# Supplementary material for: Driving tert -butyl axial: the surprising cyclopropyl effect
Source: Royal Society of Chemistry journal article supplement (doi:10.1039/d4sc05470a), 2024-01-01

## Driving *tert*-Butyl Axial: The Surprising Cyclopropyl Effect

Anthony R. Izzotti, James L. Gleason

### Table of Contents

|                                                     |                  |
|-----------------------------------------------------|------------------|
| <b>1. General information</b>                       | <b>S2</b>        |
| <b>2. Preparation of Compounds</b>                  | <b>S3-S22</b>    |
| <b>3. Single-Crystal X-Ray Data</b>                 | <b>S23-S45</b>   |
| <b>4. Supplementary References</b>                  | <b>S46</b>       |
| <b>5. Characterization Data: NMR Spectra</b>        | <b>S47-S113</b>  |
| <b>6. A-value assessment by Low Temperature NMR</b> | <b>S113-S185</b> |

## 1. General information

The following supporting information contains representative experimental procedures for the isolation and characterization all new compounds. All reactions were performed in standard glassware under argon unless otherwise noted. THF and DCM were distilled from sodium/benzophenone and calcium hydride respectively. All deuterated solvents were purchased from Sigma Aldrich and used as received, except for  $\text{CDCl}_3$  which was stored over activated 4 Å molecular sieves. Chromatographic separations were performed on standard 230-400 mesh silica gel, unless otherwise noted. Rotary evaporation was always performed at 40 °C. DCM was used to azeotrope residual ethyl acetate following chromatography as appropriate. Unless otherwise noted, all products were colourless oils.

NMR spectra for characterization of stable products were recorded at ambient temperature using Bruker AVIIIHD 500 MHz or VNMRS 500 MHz NMR spectrometers. Low temperature (< -10°C) experiments were recorded on a Bruker AVIIIHD 400 MHz. All NMR chemical shifts are reported in ppm ( $\delta$ ) units with residual solvent peaks used for reference. NMR data is reported using the following abbreviations: s, singlet; br s, broad singlet; d, doublet; t, triplet; q, quartet; dd, doublet of doublets; m, multiplet, etc. Unless otherwise stated, spectra were acquired at 25 °C.

## Preparation of Spirocyclic 6-membered compounds

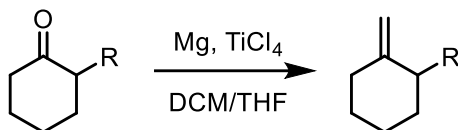

**General Procedure A<sup>1</sup>:** To acid-washed magnesium strips (8 eq.) in dry DCM (2 ml/mmol ketone) under argon is added neat TiCl<sub>4</sub> (2 eq.). The mixture is cooled to 0 °C and a solution of ketone (1 eq.) in 3:2 DCM/THF (5 ml/mmol) is added dropwise by cannula over 30 minutes. The reaction is stirred 1 hr at room temperature (though it can be left for up to 24 hrs with no negative consequence). Dilute with DCM (5 ml/mmol), cool to 0 °C and quench with sat. Na<sub>2</sub>CO<sub>3</sub> (2 ml/mmol) dropwise. Stir 10 minutes then add Na<sub>2</sub>SO<sub>4</sub> until the solution becomes translucent (the black sludge should adsorb to the Na<sub>2</sub>SO<sub>4</sub>, greatly simplifying workup). Filter through Celite, dry further with MgSO<sub>4</sub> filter through cotton and evaporate solvent. A silica plug sufficed to purify all compounds made .

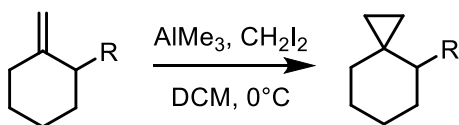

**General Procedure B<sup>2</sup>:** To a solution of olefin (1 eq.) and methylene iodide (1.2 eq.) in dry DCM (2 ml/mmol) at 0 °C is added trimethyl aluminum (1.3 eq., 2M in hexanes). The solution is stirred for 4 hrs, (can be left up for up to 24 hrs, even at RT, with no negative consequence), then cooled to 0 °C. Standard Fieser workup (dilute with Et<sub>2</sub>O, slowly add 0.4 ml 3M NaOH/ mmol AlMe<sub>3</sub>, then 0.4 ml H<sub>2</sub>O / mmol AlMe<sub>3</sub>, then 1 ml H<sub>2</sub>O/ mmol AlMe<sub>3</sub>. Warm to room temperature and add MgSO<sub>4</sub> until solution is clear. **Note: Much more caution must be taken quenching this reaction than with DIBAL.** The mixture is filtered, and solvent evaporated, chromatograph as necessary.

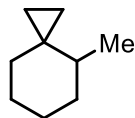

Compound **S1**: Prepared according to general procedure B from known olefin, with modification to the isolation procedure due to the volatility of this product. A Hickman distillation was performed following chromatography in pentane to remove residual hexanes and pentane. **Crude Yield**: 205 mg (38%). On distilling, much of the product was lost, leaving only about 5 mg.

**<sup>1</sup>H NMR** (800 MHz, *d*<sub>6</sub>-Acetone) δ 1.59 – 1.50 (overlapping peaks, 3H), 1.42 (m, 2H), 1.36 – 1.29 (m, 1H), 1.22 (overlapping peaks, 3H), 0.72 (d, *J* = 6.6 Hz, 3H), 0.26 (dt, *J* = 9.0, 4.5 Hz, 1H), 0.20 (dt, *J* = 9.2, 4.6 Hz, 1H), 0.05 (ddd, *J* = 9.0, 5.2, 3.8 Hz, 1H), 0.00 (ddd, *J* = 9.1, 5.2, 3.9 Hz, 1H).

**<sup>13</sup>C NMR** (201 MHz, CDCl<sub>3</sub>) δ 35.83, 32.74, 25.54, 23.24, 22.38, 22.08, 15.34, 11.04, 8.44.

**FTIR** (film, cm<sup>-1</sup>): 2957, 2921, 2852, 1460, 1445, 1375, 1008.

**HRMS** (APCI) for C<sub>9</sub>H<sub>15</sub> [M-H]<sup>+</sup>: Calculated: 123.1168 Found: 123.1174

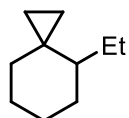

Compound **S2**: Prepared according to general procedure B from known olefin. **Yield**: 71 mg (37 %).

**<sup>1</sup>H NMR** (500 MHz, *d*<sub>6</sub>-acetone) δ 1.65-1.25 (overlapping signals, 9H, see HSQC for distinct shifts), 0.86 (t, *J* = 7.5 Hz, 3H), 0.85, (overlapping, 1 H), 0.80 (m, 1H) 0.27 (second order- apparent q, 2H), 0.15 (overlapping second order dd, 2H).

**<sup>13</sup>C NMR** (126 MHz, CDCl<sub>3</sub>) δ 43.8, 32.5, 28.3, 25.5, 22.5, 22.3, 21.9, 12.0, 11.6, 10.6.

**FTIR** (film, cm<sup>-1</sup>): 2958, 2922, 2852, 1459, 1444

**HRMS** (APCI) for C<sub>10</sub>H<sub>17</sub> [M-H]<sup>+</sup>: Calculated: 137.1325 Found: 137.1326

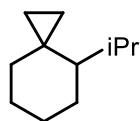

Compound **S3**: Prepared according to general procedure B from known olefin. **Yield**: 93 mg (66%).

**<sup>1</sup>H NMR** (500 MHz, CDCl<sub>3</sub>) δ <sup>1</sup>H NMR (500 MHz, acetone) δ 2.01 (m, 1H), 1.87 – 1.75 (m, 2H), 1.67 – 1.59 (m, 1H), 1.55 (tdd, *J* = 12.7, 5.4, 3.9 Hz, 1H), 1.48 – 1.43 (overlapping peaks, 3H), 1.00 (d, *J* = 6.7 Hz, 3H), 0.88 (d, *J* = 6.6 Hz, 4H), 0.57 (dtd, *J* = 13.5, 2.9, 1.4 Hz, 1H), 0.49 (ddd, *J* = 9.5, 5.6, 4.3 Hz, 1H), 0.38 – 0.30 (m, 2H), 0.12 (ddd, *J* = 9.2, 5.5, 3.9 Hz, 1H), 0.04 (dddd, *J* = 9.3, 5.6, 3.9, 1.9 Hz, 1H).

**<sup>13</sup>C NMR** (126 MHz, CDCl<sub>3</sub>) δ 49.30, 31.30, 27.56, 26.94, 25.43, 21.22, 21.12, 20.42, 14.27, 10.49.

**FTIR** (film, cm<sup>-1</sup>): 2926, 2855, 1447

**HRMS** (APCI) for C<sub>11</sub>H<sub>19</sub> [M-H]<sup>+</sup>: Calculated: 151.1481 Found: 151.1479

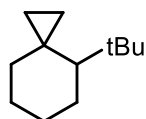

Compound **S4**: Prepared according to general procedure B from known olefin. Yield: 111 mg (73%) **<sup>1</sup>H NMR** (500 MHz, CDCl<sub>3</sub>) δ 1.98 (tdd, *J* = 13.4, 3.7, 2.0 Hz, 1H), 1.93 – 1.87 (m, 1H), 1.69 – 1.62 (m, 3H), 1.58 – 1.46 (m, 2H), 1.14 – 1.02 (m, 9H), 0.73 – 0.66 (m, 1H), 0.65 – 0.59 (m, 1H), 0.57 – 0.50 (m, 1H), 0.47 – 0.39 (m, 1H), 0.12 – 0.00 (m, 2H).

**<sup>13</sup>C NMR** (126 MHz, CDCl<sub>3</sub>) 50.81, 36.09, 33.10, 31.62, 26.73, 25.39, 22.67, 21.20, 14.95, 13.46., 14.07, 13.46.

**FTIR** (film, cm<sup>-1</sup>): 2952, 2926, 1466

**HRMS** (APCI) for C<sub>12</sub>H<sub>22</sub> [M]<sup>+</sup>: Calculated: 166.1716 Found: 166.1713

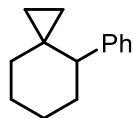

Compound **S5**: Prepared according to general procedure B from known olefin. Yield: 53 mg (72%)

**<sup>1</sup>H NMR** (500 MHz, CDCl<sub>3</sub>) δ 7.29 (m, 2H), 7.21 (m, 3H), 2.82 (dd, *J* = 9.9, 4.0 Hz, 1H), 1.98 – 1.88 (m, 2H), 1.85 (ddt, *J* = 17.2, 8.9, 4.1 Hz, 1H), 1.75 (dddd, *J* = 19.1, 16.6, 8.5, 3.6 Hz, 2H), 1.63 – 1.45 (m, 2H), 1.22 (dt, *J* = 13.4, 3.9 Hz, 1H), 0.27 – 0.19 (m, 1H), 0.19 – 0.14 (m, 1H), 0.09 (ddd, *J* = 9.2, 5.4, 4.0 Hz, 1H), 0.03 (ddd, *J* = 9.4, 5.3, 4.0 Hz, 1H).

**<sup>13</sup>C NMR** (126 MHz, CDCl<sub>3</sub>) δ 142.70, 129.07, 127.62, 125.94, 47.23, 37.28, 31.44, 26.13, 25.85, 22.59, 9.79, 7.81.

**FTIR** (film, cm<sup>-1</sup>): 3062, 3027, 2994, 2852, 1446

**HRMS** (APCI) for C<sub>14</sub>H<sub>19</sub> [M+H]<sup>+</sup>: Calculated: 187.1481 Found: 187.1480

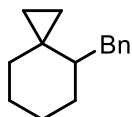

Compound **S6**: Prepared according to general procedure B from known olefin. Yield: 61 mg (88%).

**<sup>1</sup>H NMR** (500 MHz, CDCl<sub>3</sub>) δ 7.31 – 7.24 (m, 2H), 7.20 (d, *J* = 7.4 Hz, 1H), 7.18 – 7.13 (m, 2H), 2.73 (dd, *J* = 13.4, 4.7 Hz, 1H), 2.63 (dd, *J* = 13.4, 10.4 Hz, 1H), 1.81 – 1.71 (m, 1H), 1.70 – 1.58 (m, 2H), 1.55 – 1.37 (m, 4H), 1.22 (dd, *J* = 10.2, 4.8 Hz, 1H), 0.92 (apparent d [small unreadable couplings present], *J* = 11.9 Hz, 1H), 0.37 – 0.21 (overlapping signals, 4H).

**<sup>13</sup>C NMR** (126 MHz, CDCl<sub>3</sub>) δ 142.07, 129.10, 128.12, 125.52, 44.54, 36.71, 33.03, 28.17, 25.66, 22.63, 21.75, 12.65, 10.95.

**FTIR** (film, cm<sup>-1</sup>): 3064, 3026, 2993, 2923, 2852, 1454

**HRMS** (APCI) for C<sub>15</sub>H<sub>19</sub> [M-H]<sup>+</sup>: Calculated: 199.1481 Found: 199.1485.

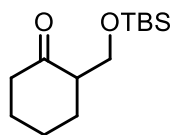

Compound **S7a**: To 2-(hydroxymethyl)cyclohexan-1-one (330 mg, 2.58 mmol) in dry DCM (6 mL) at 0 °C is added imidazole (526 mg, 3 eq.) and TBSCl (585 mg, 1.5 eq) at 0°C. The reaction is allowed to stir at room temperature for 2 hours, then quenched with aqueous sodium bicarbonate. The organic layer is washed with water and brine, dried over MgSO<sub>4</sub> and solvent removed by rotary evaporation. The crude is chromatographed (1→4% Et<sub>2</sub>O-Hexanes) to yield compound **7a** (620 mg, 99%) as a colourless oil.

<sup>1</sup>H NMR (500 MHz, CDCl<sub>3</sub>) δ 3.98 (dd, *J* = 10.4, 4.7 Hz, 1H), 3.57 (dd, *J* = 10.4, 8.0 Hz, 1H), 2.49 (m, 1H), 2.41 – 2.26 (m, 3H), 2.06 (m, 1H), 1.95 – 1.84 (m, 1H), 1.74 – 1.61 (m, 2H), 1.40 (m, 1H), 0.89 (s, 9H), 0.058 (s, 3H), 0.052 (s, 3H).

<sup>13</sup>C NMR (126 MHz, CDCl<sub>3</sub>) δ 212.29, 62.38, 52.84, 42.21, 31.01, 27.69, 25.91, 24.63, 18.30, -5.40, -5.45.

FTIR (neat, cm<sup>-1</sup>): 2929, 2857, 1707, 1251, 832, 774.

HRMS (APCI) for C<sub>13</sub>H<sub>27</sub>O<sub>2</sub>Si [M+H]<sup>+</sup>: Calculated: 243.1775 Found: 243.1775

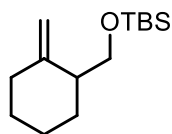

Compound **S7b**: Following general procedure A with **S7a**. **Yield:** (431 mg, 71%)

<sup>1</sup>H NMR (500 MHz, CDCl<sub>3</sub>) δ 4.69 (s, 1H), 4.56 (s, 1H), 3.79 (dd, *J* = 9.8, 5.6 Hz, 1H), 3.61 (dd, *J* = 9.8, 8.1 Hz, 1H), 2.28 – 2.15 (m, 2H), 2.11 – 2.02 (m, 1H), 1.93 – 1.82 (m, 1H), 1.76 – 1.62 (m, 3H), 1.52 – 1.42 (m, 2H), 1.38 – 1.21 (m, 3H), 0.92 (s, 9H), 0.08 (d, *J* = 1.2 Hz, 6H).

$^{13}\text{C}$  NMR (126 MHz,  $\text{CDCl}_3$ )  $\delta$  150.51, 105.94, 64.96, 45.30, 35.54, 30.50, 28.59, 25.98, 24.45, 18.38, -5.30, -5.33.

FTIR (film,  $\text{cm}^{-1}$ ): 2927, 2856, 1630 (w), 1254, 832, 773.

HRMS (ESI) for  $\text{C}_{14}\text{H}_{29}\text{OSi}$   $[\text{M}+\text{H}]^+$ : Calculated: 241.1982 Found: 241.1974

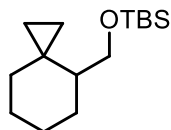

Compound **S7c**: To methylene iodide (221  $\mu\text{L}$ , 1.6 eq) in DCM (10 mL) is added diethyl zinc (2.5 mL, 2.5 mmol, 1.5 eq.) at 0  $^\circ\text{C}$ . Stir 30 minutes, then add a solution of **S7b** (400 mg, 1.67 mmol). Stir 24 hours at RT. Quench with saturated  $\text{NH}_4\text{Cl}$  (5 mL), dilute with water (25 mL). Extract with DCM. Dry over  $\text{MgSO}_4$ . Chromatograph 2%  $\text{Et}_2\text{O}$ -Hexane. Yield: 311 mg (73%). The product was a thin colourless liquid.

$^1\text{H}$  NMR (500 MHz,  $\text{CDCl}_3$ )  $\delta$  3.65 (t,  $J$  = 9.5 Hz, 1H), 3.59 (dd,  $J$  = 10.0, 5.3 Hz, 1H), 1.70 (dd,  $J$  = 13.1, 4.3 Hz, 1H), 1.61 – 1.41 (m, 6H), 1.10 (dq,  $J$  = 9.5, 4.7 Hz, 1H), 0.90 (s, 9H), 0.86 – 0.79 (m, 1H), 0.38 (ddd,  $J$  = 6.9, 4.6, 3.2 Hz, 1H), 0.31 – 0.26 (m, 1H), 0.21 – 0.11 (m, 2H), 0.05 (s, 3H), 0.05 (s, 3H).

$^{13}\text{C}$  NMR (126 MHz,  $\text{CDCl}_3$ )  $\delta$  63.51, 44.45, 33.52, 26.53, 25.99, 25.53, 21.81, 20.06, 18.33, 12.16, 10.52, -5.31, -5.36.

FTIR (film,  $\text{cm}^{-1}$ ): 2928, 2856, 1254, 834, 773.

HRMS (ESI) for  $\text{C}_{15}\text{H}_{30}\text{NaOSi}$   $[\text{M}+\text{Na}]^+$ : Calculated: 277.1958 Found: 277.1966

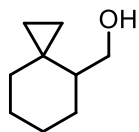

Compound **S7**: To **S7c** (100 mg, 0.39 mmol) in methanol (1 mL) is added acetyl chloride (3  $\mu\text{L}$ , 0.1 eq.). Stir 1 hr, remove volatiles. No purification was necessary. The product was a thick, colourless oil Yield: 54 mg (99%)



**<sup>1</sup>H NMR** (500 MHz, CDCl<sub>3</sub>) δ 3.74 (dd, *J* = 10.7, 6.3 Hz, 1H), 3.67 (dd, *J* = 10.7, 8.3 Hz, 1H), 1.68 – 1.57 (overlapping signals, 4H), 1.56 – 1.42 (overlapping signal, 3H), 1.33 – 1.26 (m, 1H), 1.14 (mf, 1H), 0.83 (mf, 1H), 0.42 (ddd, *J* = 8.6, 5.1, 3.4 Hz, 1H), 0.34 – 0.18 (overlapping signals, 3H).

**<sup>13</sup>C NMR** (126 MHz, CDCl<sub>3</sub>) δ 63.63, 44.57, 33.01, 26.78, 25.46, 21.70, 19.91, 11.71, 10.58.

**FTIR** (neat, cm<sup>-1</sup>): 3319 (br), 3067, 2993, 2922, 2852, 1445, 1036.

**HRMS** (ESI) for C<sub>19</sub>H<sub>16</sub>NaO [M+Na]<sup>+</sup>: Calculated: 163.1093 Found: 163.1087

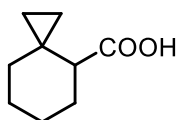

**Compound S8:** To compound **S7** (15 mg, 0.1 mmol) in acetonitrile (500 μL) was added H<sub>5</sub>IO<sub>6</sub> (1.5 eq.) and CrO<sub>3</sub> (1 mol %) in acetonitrile (prepared as a stock solution<sup>3</sup>) at 0 °C. The mixture was allowed to warm overnight. The reaction mixture was diluted with ether (5 ml), filtered through celite, and then poured into 1M HCl (5 ml). The organic layer was washed thrice with 1M HCl until the yellow colour was completely washed away. Dry over MgSO<sub>4</sub>. Chromatograph in 30% EtOAc/Hexanes and visualize with bromocresol green. The product was a thick, colourless oil. Yield: 15 mg (93%)

**<sup>1</sup>H NMR** (500 MHz, *d*<sub>6</sub>-acetone) δ 10.42 (br s, 1H), 2.08 – 2.05 (m, [overlapping with solvent], 1H), 1.94 – 1.85 (overlapping signals, 1H), 1.74 – 1.65 (overlapping signals, 2H), 1.64 – 1.54 (overlapping signals, 2H), 1.48 (overlapping signals, 2H), 1.03 (m, 1H), 0.56 (m, 1H), 0.36 (m, 1H), 0.30 (m, 1H), 0.24 (m, 1H).

**<sup>13</sup>C NMR** (126 MHz, CDCl<sub>3</sub>) δ 179.74, 52.70, 38.92, 32.93, 30.12, 28.16, 24.83, 16.83, 16.08

**FTIR** (neat, cm<sup>-1</sup>): 3400-2500 (br), 3072, 2998, 2926, 2854, 1697, 1446.

**HRMS** (ESI) for C<sub>9</sub>H<sub>13</sub>O<sub>2</sub> [M-H]<sup>-</sup>: Calculated: 153.0921 Found: 153.0921

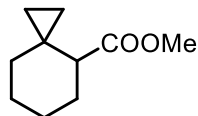

Compound **S9**: To compound **S8** (11 mg, 0.07 mmol) in dry DMF (700  $\mu$ L) was added  $K_2CO_3$  (20 mg, 0.14 mmol, 2 eq.). Methyl iodide (10  $\mu$ L, 0.16 mmol, 2.3 eq.) is added, and the mixture is stirred for 16 hrs at RT. Pour into water (10 mL), and extract with ether (4 x 1 mL). Dry over  $MgSO_4$ . Concentrate and chromatograph (5%  $Et_2O$ -Hexanes). The product was a thin colourless liquid with a pleasant, fruity aroma. **Yield**: 10 mg (85%)

$^1H$  NMR (500 MHz,  $d_6$ -acetone)  $\delta$  3.62 (s, 3H), 2.10 (t,  $J$  = 5.1 Hz, 1H), 1.88 (m, 1H), 1.73 – 1.63 (m, 2H), 1.58 (m, 1H), 1.50 m, 1H), 1.05 (d,  $J$  = 13.4 Hz, 1H), 0.57 – 0.48 (m, 1H), 0.34 – 0.22 (m, 3H).

$^{13}C$  NMR (126 MHz,  $d_6$ -acetone/  $d_3$ -acetonitrile): 174.2, 50.5, 47.8, 33.7, 27.7, 24.8, 23.0, 19.7, 11.5, 10.7. Note that mixing deuterated solvents was unintentional, no peaks were obstructed in carbon or proton spectra.

**FTIR** (film,  $cm^{-1}$ ): 2929, 2856, 1736, 1165

**HRMS** (ESI) for  $C_{10}H_{16}NaO_2$   $[M+Na]^+$ : Calculated 191.1043 Found: 191.1038

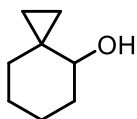

Compound **S10**: Prepared according to literature procedure.<sup>2</sup>

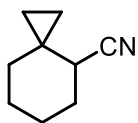

Compound **S11**: 2-spirocyclopropyl-cyclohexanone was prepared by DMP oxidation of compound **S10**, spectral data matched literature. To KOtBu (409 mg, 3.65 mmol) in dry DMSO (1.2 mL) was added TosMIC (212 mg, 1.09 mmol, ). The mixture is stirred for 15 minutes. A solution of methanol (32  $\mu$ L, 0.8 mmol) and 2-spirocyclopropyl-cyclohexanone (90 mg, 0.73 mmol) in DMSO (0.6 mL) was added. Stir overnight. Quench with water (4 mL), extract with pentane (3 x 2 mL). Wash with water. Dry over MgSO<sub>4</sub>, pass through a small plug of alumina and concentrate, leaving some pentane. This compound is very volatile, handle with care. Chromatograph in 1-5% Et<sub>2</sub>O/pentane, evaporate solvent with a stream of argon to yield a colourless oil. (54 mg, 55%).

<sup>1</sup>H NMR (500 MHz, acetone)  $\delta$  2.51 (t,  $J$  = 5.2 Hz, 1H), 1.89 – 1.78 (overlapping m, 2H), 1.73 – 1.59 (overlapping m, 4H), 1.57 – 1.47 (m, 1H), 1.18 (d,  $J$  = 13.3 Hz, 1H), 0.59 – 0.50 (m, 2H), 0.47 – 0.37 (m, 2H)

<sup>13</sup>C NMR (126 MHz, acetone)  $\delta$  121.5, 36.5, 33.5, 29.3, 25.3, 23.7, 20.7, 12.7, 11.2

FTIR (film, cm<sup>-1</sup>): 2932, 2857, 2236

HRMS (APCI) for C<sub>9</sub>H<sub>14</sub>N [M+H]<sup>+</sup>: Calculated: 136.11208 Found: 136.11240

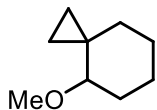

Compound **S12**: To **S10** (100 mg, 0.8 mmol) in dry DMF (4 ml) is added NaH (40 mg, 1 mmol, 1.25 eq.), stir 30 minutes. Methyl iodide (62  $\mu$ L) is added, and the mixture is stirred overnight at RT. The reaction is poured into water and extracted with pentane. Wash twice with an equal amount of water. Concentrate, chromatograph in pentane  $\rightarrow$  1% ether to yield a thin, volatile, colourless liquid. Note that removing the last bit of solvent is most easily achieved by blowing

argon into a small vial containing the compound. This proved to be far superior to careful rotary evaporation, which often lead to near complete loss of the desired product. (52 mg, 46%)

**<sup>1</sup>H NMR** (500 MHz, Acetone)  $\delta$  3.28 (s, 3H), 2.70 (d,  $J = 4.3$  Hz, 1H), 1.75 – 1.59 (m, 4H), 1.59 – 1.50 (m, 1H), 1.50 – 1.36 (m, 2H), 0.98 – 0.86 (m, 1H), 0.58 – 0.50 (m, 1H), 0.26 (td,  $J = 10.1$ , 9.1, 4.8 Hz, 2H), 0.18 – 0.09 (m, 1H).

**<sup>13</sup>C NMR** (126 MHz, Acetone)  $\delta$  81.8, 55.5, 31.9, 29.6, 24.9, 21.3, 21.2, 10.5, 8.1.

**FTIR** (film,  $\text{cm}^{-1}$ ): 2954, 2922, 2853, 1460, 1096

**HRMS** (ESI) for  $\text{C}_7\text{H}_{14}\text{NaO}$   $[\text{M}+\text{Na}]^+$ : Calculated: 163.1093 Found: 163.1085

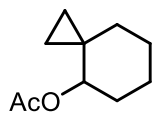

Compound **S13**: To **S10** (32mg) in dry DCM (1 mL) with triethylamine (52  $\mu\text{L}$ ) and DMAP (2 mg) is added AcCl (30  $\mu\text{L}$ , 1.5 eq.) dropwise at 0°C. Stir overnight. Pour into water, extract with DCM. Dry over  $\text{MgSO}_4$ . Chromatograph 5 $\rightarrow$ 10%  $\text{Et}_2\text{O}$ /Hexanes to yield a thin colourless oil (28.4 mg, 68%). Some ring-opening was observed, but was separated by chromatography.

**<sup>1</sup>H NMR** (500 MHz, Acetone)  $\delta$  4.35 (br s, 1H), 2.00 (s, 3H), 1.79 (dd, 12, 11.5 Hz 1H), 1.72-1.67 (overlapping m, 2H), 1.66-1.58 (overlapping m, 2H), 1.58 – 1.45 (m, 2H), 1.01 (d,  $J = 12.8$  Hz, 1H), 0.52 (ddd,  $J = 9.4, 5.3, 3.7$  Hz, 1H), 0.42 (dddd,  $J = 9.0, 5.0, 3.8, 1.3$  Hz, 1H), 0.29 (ddd,  $J = 9.2, 5.3, 3.9$  Hz, 1H), 0.24 (ddd,  $J = 8.9, 5.2, 3.7$  Hz, 1H).

**<sup>13</sup>C NMR** (126 MHz, Acetone)  $\delta$  169.5, 75.4, 31.9, 30.0, 24.5, 21.4, 21.4, 20.2, 10.0, 9.8

**FTIR** (film,  $\text{cm}^{-1}$ ): 2930, 1735, 1704, 1240.

**HRMS** (ESI) for  $\text{C}_{10}\text{H}_{16}\text{NaO}_2$   $[\text{M}+\text{Na}]^+$ : Calculated: 191.1043 Found: 191.1041

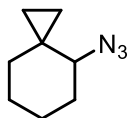

Compound **S14**: To a solution of **10** (60 mg, 0.48 mmol) in DCM (1 mL) with TMSN<sub>3</sub> (150 μL, 1.14 mmol, 2.4 eq.) at 0 °C was added TfOH (5 μL, 0.11 eq.). Stir 1 hr at 0 °C, then pour into saturated aqueous NaHCO<sub>3</sub>. Extract with DCM. Dry over MgSO<sub>4</sub>. Chromatograph 5-10% Et<sub>2</sub>O-Hexanes. **Yield**: 62 mg (87%). Note that an inseparable impurity was present, and modifying reaction temperature and time, or equivalents of acid or TMSN<sub>3</sub> did not seem to affect the ratio. As such, clean <sup>13</sup>C NMR was not obtainable.

**<sup>1</sup>H NMR** (500 MHz, CDCl<sub>3</sub>) δ 3.24 (t, *J* = 3.9 Hz, 1H), 1.83 – 1.70 (m, 3H), 1.68 – 1.57 (m, 2H), 1.56 – 1.43 (m, 2H), 0.99 (d, *J* = 13.5 Hz, 1H), 0.61 (ddd, *J* = 9.3, 5.5, 4.0 Hz, 1H), 0.42 (dddd, *J* = 9.2, 5.3, 3.8, 1.4 Hz, 1H), 0.39 – 0.32 (m, 1H), 0.29 (ddd, *J* = 8.9, 5.5, 3.8 Hz, 1H)

**FTIR** (film, cm<sup>-1</sup>): 2923, 2854, 2095.

**HRMS** (APCI) for C<sub>8</sub>H<sub>14</sub>N [M-N<sub>2</sub>+H]<sup>+</sup>: Calculated: 124.1121 Found: 124.1125 (Note that even under mild ESI conditions the loss of N<sub>2</sub> was detected.)

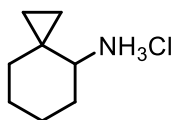

Compound **S15**: To a solution of **S11** (45 mg, 0.3 mmol) in dry THF (3 mL) at 0 °C was added LAH (30 mg, 0.8 mmol). Stir 2 hrs at RT, then work up with a standard Fieser workup. Rinse solids thoroughly with ether. To the filtrate is added a saturated solution of HCl in ether. The filtrate is then evaporated and recrystallized in DCM/Et<sub>2</sub>O to yield pure amine hydrochloride **Yield**: 37.5 mg (78%). The hydrochloride could be neutralized with aqueous hydroxide after being suspended in DCM. Note that the free amine is quite volatile, and loss of yield is likely as the DCM is evaporated.

**<sup>1</sup>H NMR** (500 MHz, CDCl<sub>3</sub>) δ 8.33 (s, 3H), 2.80 (t, *J* = 3.7 Hz, 1H), 2.15 – 2.01 (m, 2H), 1.91 – 1.79 (m, 2H), 1.75 (m, 1H), 1.65 (m, 1H), 1.52 – 1.42 (m, 1H), 0.97 (m, 1H), 0.93 – 0.85 (m, 1H), 0.57 (m, 1H), 0.44 (overlapping m, 2H).

**<sup>13</sup>C NMR** (126 MHz, CDCl<sub>3</sub>) δ 56.12, 31.14, 29.00, 24.56, 20.42, 16.47, 12.53, 10.79

**FTIR** (film, cm<sup>-1</sup>): 3335 (br), 2924, 2854, 1445.

**HRMS** (APCI) for C<sub>8</sub>H<sub>16</sub>N [M+H]<sup>+</sup>: Calculated: 126.1277 Found: 126.1278

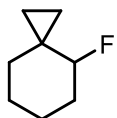

**Compound S16:** To a solution of **S10** (60 mg, 0.48 mmol) in DCM (1 mL) at 0°C was added DAST (100 μL, 0.75 mmol, 1.5 eq). Stir overnight at room temperature, then pour into saturated aqueous NaHCO<sub>3</sub>. Extract with DCM. Dry over MgSO<sub>4</sub>. Chromatograph in pentane. Note that to obtain a solution containing minimal solvent, very significant losses of desired compound resulted. Likewise, a sufficient amount for <sup>13</sup>C NMR could not be obtained. In lieu we provide <sup>19</sup>F NMR which showed a single peak.

**<sup>1</sup>H NMR** (500 MHz, *d*<sub>6</sub>-acetone) δ 3.03 (d, *J* = 55.9 Hz, 1H), 1.75 – 1.36 (m, 7H), 1.10 (d, *J* = 18.5 Hz, 1H), 0.59 – 0.46 (m, 1H), 0.41 (s, 1H), 0.14 (dtd, *J* = 19.8, 9.4, 8.9, 5.3 Hz, 2H).

**<sup>19</sup>F NMR**(376.7 MHz, *d*<sub>6</sub>-acetone, -78 °C): -126.39

**FTIR** (film, cm<sup>-1</sup>): 2919, 2856.

**HRMS** (APCI) for C<sub>8</sub>H<sub>12</sub>F [M-H]<sup>+</sup>: Calculated: 127.0918 Found: 127.0923

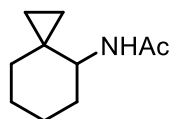

Compound **S17**: To a solution of **S10** (31 mg) in MeCN (1 mL) with H<sub>2</sub>O (50  $\mu$ L) was added TfOH (20  $\mu$ L, 1 eq.). The solution was stirred and heated at 60 °C for 14 hours, then poured into saturated aqueous NaHCO<sub>3</sub>. Extract with DCM. Dry over MgSO<sub>4</sub>. Chromatograph 1:1 Hexanes:EtOAc. A ring opened product co-eluted with the desired product, but the desired product could be selectively crystallized out by dissolving in a minimal volume of DCM, diluting with hexanes until slightly cloudy, then boiling just until the solution clarified. The solution was capped until cooled to room temperature, then allowed to slowly evaporate until white crystals formed. The crystals were filtered and washed with 5% DCM in hexanes to yield the product as white crystals. **Yield:** 21 mg (48%).

**<sup>1</sup>H NMR** (500 MHz, Acetone)  $\delta$  6.81 (s, 1H), 3.63 (s, 1H), 1.82 (s, 3H), 1.64 (m, 2H), 1.48 (overlapping m, 5H), 1.26 (br s, 1H), 0.46 (dt,  $J = 9.4, 4.6$  Hz, 1H), 0.36 (dt,  $J = 9.2, 4.7$  Hz, 1H), 0.15 (ddd,  $J = 9.2, 5.3, 4.0$  Hz, 1H), 0.07 (ddd,  $J = 9.2, 5.3, 4.1$  Hz, 1H).

**<sup>13</sup>C NMR** (126 MHz, *d*<sub>6</sub>-acetone)  $\delta$  169.3, 51.5, 34.4, 32.1, 25.7, 24.1, 23.0, 22.8, 11.0, 9.0.

**FTIR** (film, cm<sup>-1</sup>): 3304 (sharp), 3075, 2997, 2922, 2850, 1636, 1543 .

**HRMS** (ESI) for C<sub>10</sub>H<sub>17</sub>NNaO [M+Na]<sup>+</sup>: Calculated: 190.1202 Found: 190.1204

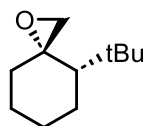

Compound **S18**: To a suspension of trimethylsulfonium iodide (1.6g, 8 mmol, 2 eq.) in THF (25 mL) at -10 °C is added nBuLi (3.1 mL, 2.5 M in hexanes, 1.9 eq.) dropwise. Stir 1 hour. A solution

of 2-tertbutyl-cyclohexanone (616 mg, 4 mmol, 1 eq.) in THF (3 mL) is then added via cannula. Stir 3 hrs at RT. The reaction is quenched with NH<sub>4</sub>Cl (1 ml/mmol base), diluted with water, and extracted with ether. The organic layer was washed with brine, then dried over MgSO<sub>4</sub>. The solvent is removed, and the crude oil is chromatograph in 5% ether to yield pure **15** as a thin oil. **Yield:** 604 mg (90%) Note that this reaction yielded only one detectable diastereomer.

**<sup>1</sup>H NMR** (500 MHz, CDCl<sub>3</sub>) δ 2.75 (d, *J* = 5.1 Hz, 1H), 2.47 (d, *J* = 5.0 Hz, 1H), 1.89 – 1.79 (m, 2H), 1.76 (mf, 1H), 1.72 – 1.64 (m, 2H), 1.55 (m, 1H), 1.46 (m, 1H), 1.32 (m, 1H), 1.29 – 1.22 (m, 1H), 1.00 (s, 9H).

**<sup>13</sup>C NMR** (126 MHz, CDCl<sub>3</sub>) δ 61.85, 55.03, 49.68, 34.32, 33.98, 30.31, 27.03, 25.44, 23.87.

**FTIR** (film, cm<sup>-1</sup>): 2932, 2864, 1469, 1446, 1365

**HRMS** (APCI) for C<sub>11</sub>H<sub>21</sub>O [M+H]<sup>+</sup>: Calculated: 169.15869 Found: 169.15840

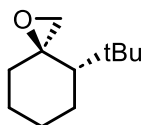

**Compound S19:** To a solution of 1-(tert-butyl)-2-methylenecyclohexane (616 mg, 4 mmol) in DCM (16 mL) was added mCPBA (<70% purity, 1.0 g, 1.4 eq.). The solution is stirred overnight. Pentane is added to triturate byproducts, the solution is filtered through silica, then concentrated to yield a 10:1 diastereomeric mixture of **S16** : **S15**. The isomers could be separated by chromatography in 2-5% Et<sub>2</sub>O: Hexanes with ample silica. Combined yield: 499 mg (74%).

**<sup>1</sup>H NMR** (500 MHz, CDCl<sub>3</sub>) δ 2.87 (d, *J* = 4.5 Hz, 1H), 2.68 (d, *J* = 4.6 Hz, 1H), 1.90 – 1.79 (m, 3H), 1.75 – 1.60 (m, 3H), 1.54 (mz, 1H), 1.22 (dt, *J* = 13.3, 4.2 Hz, 1H), 1.11 (td, *J* = 4.7, 1.4 Hz, 1H), 1.02 (s, 9H).

**<sup>13</sup>C NMR** (126 MHz, CDCl<sub>3</sub>) δ 60.60, 55.72, 50.02, 34.09, 32.56, 30.55, 25.69, 24.01, 22.57.

**FTIR** (film, cm<sup>-1</sup>): 2936, 2865, 1470, 1365.

**HRMS** (APCI) for C<sub>11</sub>H<sub>21</sub>O [M+H]<sup>+</sup>: Calculated: 169.15869 Found: 169.15845



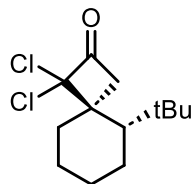

Compound **S20a**: To a solution of 1-(tert-butyl)-2-methylenecyclohexane (250 mg, 1.64 mmol) in Et<sub>2</sub>O (4 mL) with Zinc dust (131 mg, 2 mmol, 1.2 eq) is added trichloroacetyl chloride (222  $\mu$ L, 2 mmol, 1.2 eq.). Stir 2 hours at room temperature. Filter through a small pad of silica, and concentrate solution. Typically, chromatography was not required, but 5% Et<sub>2</sub>O-Hexanes is what can be used if impurities are present. Only one diastereomer was detectable in the crude. **Yield:** 361 mg (84%) of a pale yellow oil.

<sup>1</sup>H NMR (500 MHz, CDCl<sub>3</sub>) 3.81 (d, *J* = 16.5 Hz, 1H), 2.65 (d, *J* = 16.5 Hz, 1H), 2.52 – 2.43 (m, 1H), 2.17 – 2.06 (m, 3H), 1.83 – 1.77 (m, 1H), 1.70 – 1.64 (m, 1H), 1.58 (m, 2H), 1.53 – 1.45 (m, 1H), 1.14 (s, 9H).

<sup>13</sup>C NMR (126 MHz, CDCl<sub>3</sub>)  $\delta$  194.27, 94.24, 53.40, 49.87, 43.89, 34.63, 32.73, 32.68, 27.00, 22.18, 19.52

FTIR (film, cm<sup>-1</sup>): 2960, 2926, 2870, 1806, 1463.

HRMS (APCI) for C<sub>13</sub>H<sub>21</sub>OCl<sub>2</sub> [M+H]<sup>+</sup>: Calculated: 263.0964 Found: 263.0960. Isotope patterns were consistent with 2 chlorine atoms

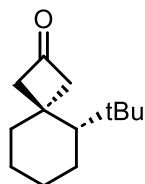

Compound **S20**: To a solution of **S20a** (350 mg, 1.33 mmol) in acetic acid (5 mL) was added Zinc dust (533 mg, >5 eq.), the mixture was heated to 60°C. Stir 2 hours, or until the solution becomes translucent. The mixture is cooled and slowly added to an aqueous solution of sodium carbonate

(50 mL). Extract with DCM. Wash with NaHCO<sub>3</sub> twice. Concentrate and chromatograph (5% Et<sub>2</sub>O-Hexanes) Yield: 293 mg (92 %)

<sup>1</sup>H NMR (500 MHz, CDCl<sub>3</sub>) δ 3.28 (dt, *J* = 17.2, 2.9 Hz, 1H), 3.24 – 3.16 (d, 17.2 Hz 1H), 2.74 (ddd, *J* = 17.3, 6.2, 2.5 Hz, 1H), 2.63 (ddd, *J* = 17.2, 6.2, 2.5 Hz, 1H), 1.88 – 1.76 (m, 1H), 1.71 – 1.62 (m, 2H), 1.59 – 1.49 (m, 5H), 1.39 (mf, 1H), 1.08 (s, 9H).<sup>1</sup>

<sup>13</sup>C NMR (126 MHz, CDCl<sub>3</sub>) δ 209.45, 59.65, 54.99, 51.74, 38.60, 35.62, 35.46, 31.99, 26.72, 24.21, 23.63.

FTIR (film, cm<sup>-1</sup>): 2927, 2860, 1783.

HRMS (APCI) for C<sub>13</sub>H<sub>21</sub>O [M+H]<sup>+</sup>: Calculated: 195.1741 Found: 195.1743

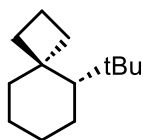

Compound **S21**: To a solution of **S20** (30 mg, 0.15 mmol) in Diethylene glycol (300 μL) was added anhydrous hydrazine (30 μL, 6 eq.), then KOH (25 mg, 3 eq.). Heat to 200 °C for 3 hours. The mixture is cooled and poured into an excess of 0.1M HCl. Extract thrice with pentane. Wash twice with 1 M HCl. Concentrate and chromatograph (pentane) **Yield**: 22 mg (81 %)

<sup>1</sup>H NMR (500 MHz, CDCl<sub>3</sub>) δ 2.37 – 2.28 (m, 1H), 2.03 – 1.96 (m, 1H), 1.91 – 1.79 (m, 3H), 1.77 – 1.70 (m, 1H), 1.69 – 1.61 (m, 1H), 1.58 (m, 1H), 1.53 m, 3H), 1.46 (m, 2H), 1.29 – 1.24 (m, 2H), 1.04 (s, 9H).

<sup>13</sup>C NMR (126 MHz, CDCl<sub>3</sub>) δ 58.51, 50.08, 40.22, 40.15, 39.81, 36.97, 36.83, 29.61, 28.68, 27.42, 20.91.

FTIR (film, cm<sup>-1</sup>): 2925, 2858, 1463, 1446.

HRMS (ESI) for C<sub>13</sub>H<sub>23</sub> [M-H]<sup>+</sup>: Calculated: 179.1794 Found: 179.1796

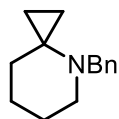

Compound **S22**: Prepared according to literature procedure<sup>4</sup>. Characterization data was consistent. The product was a pale yellow oil that would discolour to a light pink over time, no notable difference was observed by NMR despite this.

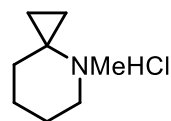

Compound **S23**: To  $\text{Ti}(\text{O}i\text{Pr})_4$  (1.33 mL, 4.4 mmol) in dry THF (20 mL) at  $-78\text{ }^\circ\text{C}$  is added EtMgBr (3.33 mL, 10 mmol) dropwise. Stir 10 minutes. N-Me-valerolactam (450 mg) is added in THF (5 mL), and the solution is heated to reflux under argon for 24 hours. The solution is cooled to RT then quenched with 3M NaOH. NaOH pellets are added, and the mixture is stirred until the colour becomes light yellow or green. The mixture is distilled until about most of the THF has distilled. To the distillate is added sat. HCl in  $\text{Et}_2\text{O}$ , a white solid precipitates out. The volatiles are removed and the crude solid is recrystallized. The free base could be isolated by dissolving in DCM and shaking with 3M NaOH. The free base is quite volatile, evaporate cautiously.

**Yield:** 169 mg (34 %)

**$^1\text{H}$  NMR** (500 MHz,  $\text{CDCl}_3$ )  $\delta$  2.79 – 2.73 (m, 2H), 2.32 (s, 3H), 1.68 – 1.59 (m, 3H), 1.48 (m, 2H), 1.35 (dd,  $J = 6.3, 3.2$  Hz, 4H), 0.48 (q,  $J = 4.0$  Hz, 2H), 0.27 – 0.23 (m, 2H).

**$^{13}\text{C}$  NMR** (126 MHz,  $d_6$ -acetone)  $\delta$  51.3, 44.5, 35.9, 27.0, 21.9, 18.0, 11.5, 10.6.

**FTIR** (film,  $\text{cm}^{-1}$ ): 2926, 2854, 1457, 1446.

**HRMS** (ESI) for  $\text{C}_8\text{H}_{16}\text{N}$   $[\text{M}+\text{H}]^+$ : Calculated: 126.1277 Found: 126.1277

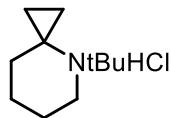

Compound **S24**: Following the same reaction conditions as **S20**. Following quenching, the reaction is extracted with Et<sub>2</sub>O. Dry over MgSO<sub>4</sub> and precipitate with sat. HCl in Et<sub>2</sub>O, remove volatiles to yield an off-white solid **Yield**: 202 mg (50 %)

**Crystallization conditions**: The initially obtained solid was dissolved in toluene, and allowed to slowly evaporate until rectangular prisms grew.

**<sup>1</sup>H NMR** (500 MHz, CDCl<sub>3</sub>) δ 10.46 (s, 1H), 3.63 (dd, *J* = 13.6, 3.9 Hz, 1H), 3.48 (tt, *J* = 14.1, 4.2 Hz, 1H), 2.46 (dddd, 15.0, 12.6, 4.0, 2.6 Hz, 1H), 2.36 – 2.26 (m, 1H), 2.06 – 1.96 (m, 1H), 1.95 – 1.77 (overlapping H, 4H), 1.71 (s, 9H), 1.04 (dt, *J* = 10.0, 6.6 Hz, 1zH), 0.93 – 0.85 (br d, 15.4Hz, 1H), 0.46 (ddd, *J* = 9.9, 6.9, 5.5 Hz, 1H).

**<sup>13</sup>C NMR** (126 MHz, CDCl<sub>3</sub>) <sup>13</sup>C NMR (126 MHz, CDCl<sub>3</sub>) δ 68.1, 48.5, 43.8, 30.4, 29.5, 21.5, 20.6, 16.5, 11.4.

**FTIR** (solid, cm<sup>-1</sup>): 3390, 2952, 2556, 1177

**HRMS** (ESI) for C<sub>11</sub>H<sub>22</sub>N [M+H]<sup>+</sup>: Calculated: 168.1747 Found: 168.1747

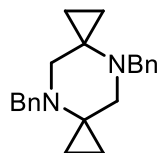

Compound **S25**: To Ti(OiPr)<sub>4</sub> (150 μL) in dry THF (5 mL) at 0°C is added EtMgBr ( ) over 15 minutes. 1,4-dibenzylpiperazine-2,5-dione (100mg, 0.33 mmol) dissolved in THF (2 mL) is added. Stir overnight at RT. Note that attempts to promote double cyclopropanation by heating to 60°C yielded nearly identical results. Quench with 3M NaOH and saturated rochelle's salt solution and water (5 mL each), stir 30 minutes. Dilute further with water until the aqueous phase is clear.

Extract with ether. Dry over MgSO<sub>4</sub>. Chromatograph 5→60% EtOAc/Hexanes. This compound elutes in 5% EtOAc, which after solvent removal yields a white powder. Yield (7mg, 7%)

**Crystallization conditions:** The white powder obtained from the column was nearly dissolved in toluene, then heated until full dissolution occurred. The vial was sealed and allowed to recrystallize overnight, yielding small colourless prisms.

**<sup>1</sup>H NMR:** δ 7.32 (s, 4H), 7.24 (s, 1H), 4.09 (s, 2H), 3.06-2.46 (br s, 2H), 0.75 (s, 2H), 0.45 (s, 2H).

**<sup>13</sup>C NMR** (126 MHz, cdcl<sub>3</sub>) δ 140.3, 128.4, 128.2, 126.7, 54.2, 49.1, 37.8, 12.4.

**FTIR** (film, cm<sup>-1</sup>): 3062, 3028, 2944, 2849

**HRMS** (ESI) for C<sub>22</sub>H<sub>27</sub>N<sub>2</sub> [M+H]<sup>+</sup>: Calculated: 319.2169 Found: 319.2173

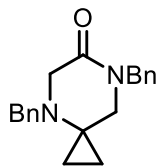

Compound **S26**: Isolated as the major product from the reaction above. Yield (49 mg, 49%).

**<sup>1</sup>H NMR:** δ 7.40 – 7.34 (m, 2H), 7.34 – 7.29 (m, 5H), 7.29 – 7.24 (m, 3H), 4.68 (s, 2H), 3.83 (s, 2H), 3.45 (s, 2H), 3.22 (s, 2H), 0.87 – 0.79 (m, 2H), 0.56 – 0.47 (m, 2H).

**<sup>13</sup>C NMR** (126 MHz, cdcl<sub>3</sub>) δ 168.6, 138.1, 136.8, 128.8, 128.7, 128.4, 127.9, 127.6, 127.3, 56.2, 53.0, 49.5, 48.6, 39.1, 13.7

**FTIR** (film, cm<sup>-1</sup>): 3028, 2915, 1642

**HRMS** (ESI) for C<sub>20</sub>H<sub>22</sub>N<sub>2</sub>NaO [M+Na]<sup>+</sup>: Calculated: 329.1624 Found: 329.1630

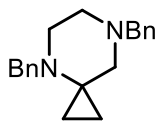

Compound **S27**: To **S26** in dry THF(3 mL) is added LAH (20 mg, 0.5 mmol) at RT. Heat to 50 °C overnight. Standard Fieser workup. The filtrate was concentrated to ~1 ml, then acidified with sat. HCl in Et<sub>2</sub>O, causing a white solid to crash out. The solid was broken up to a fine powder, and the solvent was decanted. The solid washed with ether three times, leaving pure **S24** x 2HCl. The solid is dissolved in DCM, washed with 3M NaOH, then dried and the solvent is removed, leaving high purity **S26** as a colourless oil (37 mg, 84%).

**Crystallization conditions:** No SCXRD quality crystals were obtained using HCl or TFA in a large variety of solvents. Addition of exactly 2 equivalents of pTsOH hydrate to the compound in acetonitrile followed by slow evaporation yielded very thin, white needles, which were washed with acetonitrile, then recrystallized, which yielded higher quality crystals.

**<sup>1</sup>H NMR** (500 MHz, CDCl<sub>3</sub>) δ 7.39 – 7.21 (m, 10H), 3.83 (s, 2H), 3.56 (s, 2H), 2.89 (s, 2H), 2.52 (t, *J* = 5.1 Hz, 2H), 2.29 (s, 2H), 0.73 (s, 2H), 0.47 (s, 2H).

**<sup>13</sup>C NMR** (126 MHz, CDCl<sub>3</sub>) δ 134.9, 133.0, 123.9, 123.4, 123.0, 123.0, 121.8, 121.5, 58.3, 49.9, 48.4, 42.6, 41.7, 37.2, 8.3 (broad).

**FTIR** (film, cm<sup>-1</sup>): 3026, 2924, 2802

**HRMS** (ESI) for C<sub>20</sub>H<sub>25</sub>N<sub>2</sub> [M+H]<sup>+</sup>: Calculated: 293.2012 Found: 293.2003

## 2. Single-Crystal X-Ray Data

Single crystal X-ray diffraction (SCXRD) data were measured on a Bruker D8 Venture diffractometer equipped with a Photon 200 area detector, and *I $\mu$ S* microfocus X-ray source (Bruker AXS, CuK $\alpha$  source). All measurements were carried out at room temperature for all structures. All crystals were coated with a thin layer of amorphous oil to decrease crystal deterioration, structural disorder, or any related thermal motion effects and to improve the accuracy of the structural results. Structure solution was carried out using the SHELXTL package from Bruker.<sup>6</sup> The parameters were refined for all data by full-matrix-least-squares or F2 using SHELXL.<sup>7</sup>

All of the non-hydrogen atoms were refined with anisotropic thermal parameters. All hydrogen atom thermal parameters were constrained to ride on the carrier atom. Structure **S27 x 2TsOH x H<sub>2</sub>O** was found to have two disordered units. The first in one of the tosylates, in which the oxygen atoms were split into two groups by a rotation. Another disorder is found around the water solvate which is forming hydrogen bonding between two tosylates. Both disorders were successfully modelled.

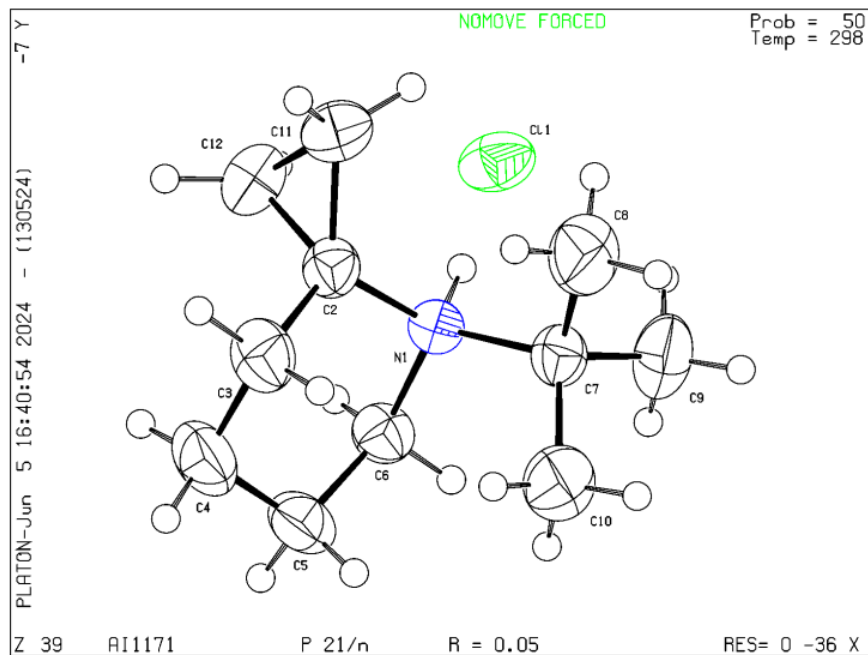

**Table 1 Crystal data and structure refinement for S24**

|                   |                   |
|-------------------|-------------------|
| Empirical formula | $C_{11}H_{22}ClN$ |
| Formula weight    | 203.74            |
| Temperature/K     | 298(2)            |
| Crystal system    | monoclinic        |
| Space group       | $P2_1/n$          |
| a/Å               | 8.2410(3)         |
| b/Å               | 15.6585(7)        |
| c/Å               | 9.0543(4)         |
| $\alpha$ /°       | 90                |



|                                               |                                                               |
|-----------------------------------------------|---------------------------------------------------------------|
| $\beta/^\circ$                                | 92.0640(10)                                                   |
| $\gamma/^\circ$                               | 90                                                            |
| Volume/ $\text{\AA}^3$                        | 1167.62(8)                                                    |
| Z                                             | 4                                                             |
| $\rho_{\text{calc}}/\text{g}/\text{cm}^3$     | 1.159                                                         |
| $\mu/\text{mm}^{-1}$                          | 2.541                                                         |
| F(000)                                        | 448.0                                                         |
| Crystal size/ $\text{mm}^3$                   | $0.796 \times 0.264 \times 0.214$                             |
| Radiation                                     | CuK $\alpha$ ( $\lambda = 1.54178$ )                          |
| $2\Theta$ range for data collection/ $^\circ$ | 12.142 to 145.196                                             |
| Index ranges                                  | $-7 \leq h \leq 10, -19 \leq k \leq 19, -11 \leq l \leq 11$   |
| Reflections collected                         | 18713                                                         |
| Independent reflections                       | 2268 [ $R_{\text{int}} = 0.0414, R_{\text{sigma}} = 0.0254$ ] |
| Data/restraints/parameters                    | 2268/0/119                                                    |
| Goodness-of-fit on $F^2$                      | 1.094                                                         |
| Final R indexes [ $I \geq 2\sigma(I)$ ]       | $R_1 = 0.0461, wR_2 = 0.1321$                                 |
| Final R indexes [all data]                    | $R_1 = 0.0478, wR_2 = 0.1348$                                 |
| Largest diff. peak/hole / $e \text{\AA}^{-3}$ | 0.31/-0.18                                                    |

**Table 2 Fractional Atomic Coordinates ( $\times 10^4$ ) and Equivalent Isotropic Displacement Parameters ( $\text{\AA}^2 \times 10^3$ ) for Al1171.  $U_{eq}$  is defined as 1/3 of the trace of the orthogonalised  $U_{ij}$  tensor.**

| Atom | $x$        | $y$        | $z$        | $U(eq)$ |
|------|------------|------------|------------|---------|
| Cl1  | 2640.3(5)  | 6086.8(3)  | 3073.4(4)  | 56.1(2) |
| N1   | 3128.3(14) | 6128.5(7)  | 6539.6(14) | 36.0(3) |
| C2   | 1502.9(18) | 6240.9(10) | 7201.7(18) | 42.6(4) |
| C5   | 3425(2)    | 4812.4(11) | 8200(2)    | 56.8(5) |
| C4   | 1820(3)    | 5012.2(13) | 8897(2)    | 66.6(5) |
| C3   | 1449(2)    | 5961.6(12) | 8788(2)    | 55.9(5) |
| C8   | 3802(3)    | 7654.9(12) | 7161(3)    | 77.1(7) |
| C7   | 4512.7(18) | 6774.9(9)  | 6970.3(17) | 43.4(4) |
| C6   | 3580.7(19) | 5193.8(9)  | 6670.0(17) | 44.1(4) |
| C9   | 5672(2)    | 6783.8(15) | 5693(2)    | 67.5(5) |
| C10  | 5500(3)    | 6514.1(15) | 8358(2)    | 68.4(6) |
| C11  | 387(2)     | 6909.3(12) | 6571(2)    | 59.6(5) |
| C12  | 82(2)      | 5988.3(12) | 6202(2)    | 58.2(5) |

**Table 3 Anisotropic Displacement Parameters ( $\text{\AA}^2 \times 10^3$ ) for S24. The Anisotropic displacement factor exponent takes the form:  $-2\pi^2[h^2a^{*2}U_{11}+2hka^*b^*U_{12}+\dots]$ .**

| Atom | $U_{11}$ | $U_{22}$ | $U_{33}$ | $U_{23}$ | $U_{13}$  | $U_{12}$  |
|------|----------|----------|----------|----------|-----------|-----------|
| Cl1  | 51.6(3)  | 75.6(4)  | 40.7(3)  | 0.42(15) | -4.45(18) | 13.11(17) |

**Table 3 Anisotropic Displacement Parameters ( $\text{\AA}^2 \times 10^3$ ) for S24. The Anisotropic displacement factor exponent takes the form:  $-2\pi^2[h^2a^{*2}U_{11}+2hka^*b^*U_{12}+\dots]$ .**

| Atom | $U_{11}$ | $U_{22}$ | $U_{33}$ | $U_{23}$ | $U_{13}$ | $U_{12}$  |
|------|----------|----------|----------|----------|----------|-----------|
| N1   | 38.2(6)  | 35.8(6)  | 34.1(6)  | -0.9(4)  | 1.1(5)   | 1.0(4)    |
| C2   | 40.4(8)  | 42.1(7)  | 45.8(8)  | -0.8(6)  | 6.7(6)   | 1.2(6)    |
| C5   | 65.9(11) | 42.3(8)  | 62.3(11) | 13.4(7)  | 3.6(8)   | 3.6(7)    |
| C4   | 76.1(12) | 62.5(11) | 62.3(11) | 20.1(9)  | 17.6(9)  | -4.1(9)   |
| C3   | 61.4(10) | 60.5(10) | 46.9(9)  | 0.9(7)   | 17.8(8)  | -0.4(8)   |
| C8   | 66.3(12) | 40.0(9)  | 125(2)   | -7.2(10) | 2.0(12)  | -7.3(8)   |
| C7   | 43.1(8)  | 40.1(7)  | 46.9(8)  | -1.6(6)  | 0.1(6)   | -5.7(6)   |
| C6   | 49.3(8)  | 34.8(7)  | 48.3(8)  | -3.4(6)  | 3.5(6)   | 3.6(6)    |
| C9   | 52.0(10) | 87.9(14) | 63.3(11) | -2.2(10) | 10.1(8)  | -20.1(9)  |
| C10  | 68.7(12) | 76.4(13) | 58.8(11) | -0.1(9)  | -17.0(9) | -18.7(10) |
| C11  | 47.7(9)  | 58.1(10) | 73.0(12) | 3.7(8)   | 3.2(8)   | 13.2(7)   |
| C12  | 41.7(9)  | 66.8(11) | 66.0(12) | -5.0(8)  | 1.4(8)   | -3.5(7)   |

**Table 4 Bond Lengths for S24**

| Atom | Atom | Length/ $\text{\AA}$ | Atom | Atom | Length/ $\text{\AA}$ |
|------|------|----------------------|------|------|----------------------|
| N1   | C2   | 1.497(2)             | C5   | C6   | 1.519(2)             |
| N1   | C7   | 1.5640(18)           | C4   | C3   | 1.520(3)             |
| N1   | C6   | 1.5139(17)           | C8   | C7   | 1.509(2)             |

**Table 4 Bond Lengths for S24**

| Atom Atom Length/Å |     |          | Atom Atom Length/Å |     |          |
|--------------------|-----|----------|--------------------|-----|----------|
| C2                 | C3  | 1.503(2) | C7                 | C9  | 1.526(2) |
| C2                 | C11 | 1.493(2) | C7                 | C10 | 1.528(2) |
| C2                 | C12 | 1.507(2) | C11                | C12 | 1.500(3) |
| C5                 | C4  | 1.518(3) |                    |     |          |

**Table 5 Bond Angles for S24**

| Atom Atom Atom Angle/° |    |     |            | Atom Atom Atom Angle/° |     |     |            |
|------------------------|----|-----|------------|------------------------|-----|-----|------------|
| C2                     | N1 | C7  | 118.63(11) | C2                     | C3  | C4  | 109.50(15) |
| C2                     | N1 | C6  | 107.68(11) | C8                     | C7  | N1  | 109.68(13) |
| C6                     | N1 | C7  | 115.52(11) | C8                     | C7  | C9  | 109.52(16) |
| N1                     | C2 | C3  | 113.95(14) | C8                     | C7  | C10 | 110.32(17) |
| N1                     | C2 | C12 | 114.57(14) | C9                     | C7  | N1  | 106.73(13) |
| C3                     | C2 | C12 | 116.62(15) | C9                     | C7  | C10 | 107.24(15) |
| C11                    | C2 | N1  | 118.47(14) | C10                    | C7  | N1  | 113.21(13) |
| C11                    | C2 | C3  | 122.02(14) | N1                     | C6  | C5  | 115.01(12) |
| C11                    | C2 | C12 | 59.98(12)  | C2                     | C11 | C12 | 60.48(12)  |
| C4                     | C5 | C6  | 113.66(15) | C11                    | C12 | C2  | 59.54(11)  |
| C5                     | C4 | C3  | 110.54(14) |                        |     |     |            |

**Table 6 Hydrogen Atom Coordinates ( $\text{\AA}\times 10^4$ ) and Isotropic Displacement Parameters ( $\text{\AA}^2\times 10^3$ ) for Al1171.**

| Atom | $x$     | $y$     | $z$     | $U(\text{eq})$ |
|------|---------|---------|---------|----------------|
| H1   | 2973.9  | 6202    | 5468.06 | 54             |
| H5A  | 3546.61 | 4197.54 | 8135.4  | 68             |
| H5AB | 4303.07 | 5027.04 | 8839.68 | 68             |
| H4A  | 1871.13 | 4840.87 | 9927.09 | 80             |
| H4AB | 957.33  | 4690.67 | 8397.12 | 80             |
| H3A  | 380.92  | 6074.18 | 9160.83 | 67             |
| H3AB | 2240.03 | 6281.06 | 9383.19 | 67             |
| H8A  | 4648.93 | 8045.72 | 7460.87 | 116            |
| H8B  | 2998.56 | 7637.01 | 7901.5  | 116            |
| H8C  | 3307.53 | 7841.63 | 6240.23 | 116            |
| H6A  | 4694.08 | 5125.81 | 6377.46 | 53             |
| H6AB | 2895.4  | 4870.92 | 5978.7  | 53             |
| H9A  | 6146.67 | 6228.12 | 5590.95 | 101            |
| H9B  | 6513.61 | 7196.37 | 5890.11 | 101            |
| H9C  | 5083.76 | 6932.58 | 4795.29 | 101            |
| H10A | 5983.6  | 5964.78 | 8206.72 | 103            |
| H10B | 4798.78 | 6485.15 | 9181.04 | 103            |
| H10C | 6337.42 | 6928.49 | 8559.7  | 103            |

**Table 6 Hydrogen Atom Coordinates ( $\text{\AA} \times 10^4$ ) and Isotropic Displacement Parameters ( $\text{\AA}^2 \times 10^3$ ) for AI1171.**

| Atom | x       | y       | z       | U(eq) |
|------|---------|---------|---------|-------|
| H11A | 791.41  | 7274.08 | 5800.27 | 71    |
| H11B | -345.57 | 7186.57 | 7235.21 | 71    |
| H12A | 305.88  | 5797.25 | 5210.88 | 70    |
| H12B | -831.81 | 5709.69 | 6646.72 | 70    |

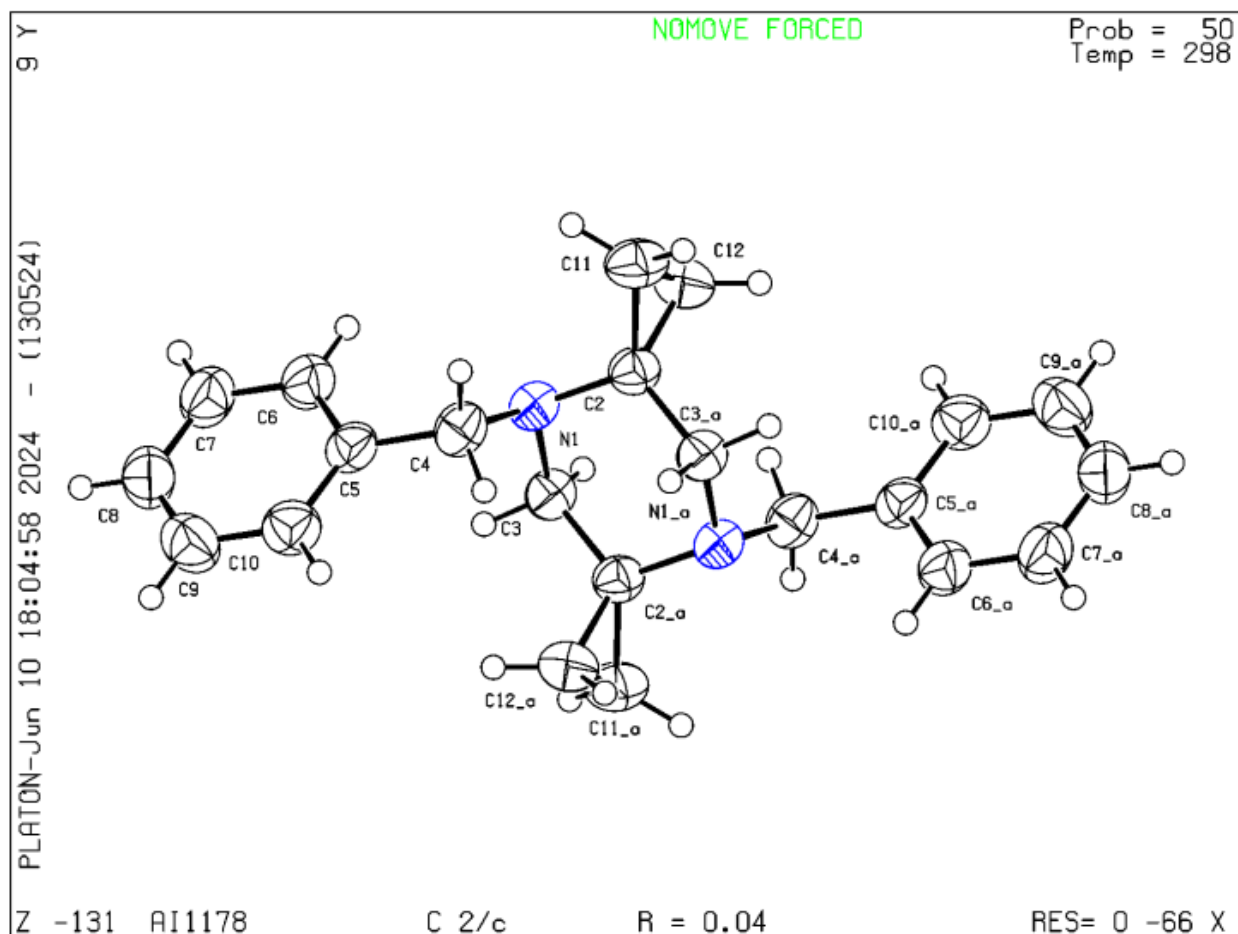

**Table 1 Crystal data and structure refinement for S25**

|                                             |                                                               |
|---------------------------------------------|---------------------------------------------------------------|
| Empirical formula                           | C <sub>22</sub> H <sub>26</sub> N <sub>2</sub>                |
| Formula weight                              | 318.45                                                        |
| Temperature/K                               | 298(2)                                                        |
| Crystal system                              | monoclinic                                                    |
| Space group                                 | C2/c                                                          |
| a/Å                                         | 16.1970(5)                                                    |
| b/Å                                         | 5.7050(2)                                                     |
| c/Å                                         | 20.8080(6)                                                    |
| α/°                                         | 90                                                            |
| β/°                                         | 110.3740(10)                                                  |
| γ/°                                         | 90                                                            |
| Volume/Å <sup>3</sup>                       | 1802.45(10)                                                   |
| Z                                           | 4                                                             |
| ρ <sub>calc</sub> /cm <sup>3</sup>          | 1.173                                                         |
| μ/mm <sup>-1</sup>                          | 0.519                                                         |
| F(000)                                      | 688.0                                                         |
| Crystal size/mm <sup>3</sup>                | 0.346 × 0.264 × 0.063                                         |
| Radiation                                   | CuKα (λ = 1.54178)                                            |
| 2θ range for data collection/°              | 12.024 to 145.32                                              |
| Index ranges                                | -20 ≤ h ≤ 17, -7 ≤ k ≤ 7, -25 ≤ l ≤ 25                        |
| Reflections collected                       | 14634                                                         |
| Independent reflections                     | 1767 [R <sub>int</sub> = 0.0455, R <sub>sigma</sub> = 0.0259] |
| Data/restraints/parameters                  | 1767/0/110                                                    |
| Goodness-of-fit on F <sup>2</sup>           | 1.037                                                         |
| Final R indexes [I >= 2σ (I)]               | R <sub>1</sub> = 0.0438, wR <sub>2</sub> = 0.1070             |
| Final R indexes [all data]                  | R <sub>1</sub> = 0.0523, wR <sub>2</sub> = 0.1165             |
| Largest diff. peak/hole / e Å <sup>-3</sup> | 0.14/-0.14                                                    |

**Table 2 Fractional Atomic Coordinates ( $\times 10^4$ ) and Equivalent Isotropic Displacement Parameters ( $\text{\AA}^2 \times 10^3$ ) for S25.  $U_{eq}$  is defined as 1/3 of the trace of the orthogonalised  $U_{ij}$  tensor.**

| Atom | x           | y           | z          | U(eq)    |
|------|-------------|-------------|------------|----------|
| N1   | 3280.4 (6)  | 2232.6 (18) | 4788.7 (5) | 41.8 (3) |
| C2   | 3337.8 (8)  | 2258 (2)    | 5501.7 (6) | 42.3 (3) |
| C3   | 2394.6 (7)  | 1433 (2)    | 4360.8 (6) | 43.2 (3) |
| C4   | 3526.2 (8)  | 4499 (2)    | 4570.4 (7) | 48.3 (4) |
| C6   | 4068.0 (9)  | 2520 (3)    | 3710.2 (8) | 55.4 (4) |
| C5   | 3620.8 (8)  | 4364 (2)    | 3874.9 (7) | 45.6 (3) |
| C8   | 3836.1 (10) | 4173 (3)    | 2605.1 (8) | 61.3 (4) |
| C7   | 4174.1 (11) | 2429 (3)    | 3080.8 (8) | 61.8 (4) |
| C10  | 3285.2 (9)  | 6107 (2)    | 3392.8 (7) | 55.5 (4) |
| C11  | 4249.3 (9)  | 2279 (3)    | 6022.3 (7) | 57.8 (4) |
| C12  | 3707.0 (9)  | 73 (3)      | 5906.2 (7) | 55.5 (4) |
| C9   | 3391.0 (10) | 6019 (3)    | 2760.6 (8) | 63.7 (4) |

**Table 3 Anisotropic Displacement Parameters ( $\text{\AA}^2 \times 10^3$ ) for S25. The Anisotropic displacement factor exponent takes the form:  $-2\pi^2[h^2a^2U_{11}+2hka*b*U_{12}+...]$ .**

| Atom | U <sub>11</sub> | U <sub>22</sub> | U <sub>33</sub> | U <sub>23</sub> | U <sub>13</sub> | U <sub>12</sub> |
|------|-----------------|-----------------|-----------------|-----------------|-----------------|-----------------|
| N1   | 38.3 (5)        | 42.8 (6)        | 45.3 (6)        | -2.9 (4)        | 15.9 (4)        | 0.2 (4)         |
| C2   | 37.9 (6)        | 44.3 (7)        | 42.4 (6)        | -2.9 (5)        | 11.1 (5)        | -0.3 (5)        |
| C3   | 42.3 (6)        | 44.4 (7)        | 43.1 (6)        | -5.8 (5)        | 14.9 (5)        | -1.9 (5)        |
| C4   | 47.3 (7)        | 45.0 (7)        | 56.1 (8)        | -3.2 (6)        | 22.3 (6)        | -2.7 (5)        |
| C6   | 55.8 (8)        | 54.2 (8)        | 62.6 (8)        | 9.5 (6)         | 28.5 (7)        | 11.3 (6)        |
| C5   | 38.7 (6)        | 45.5 (7)        | 54.8 (7)        | 1.3 (5)         | 18.9 (5)        | -1.6 (5)        |
| C8   | 61.9 (9)        | 72.3 (10)       | 53.7 (8)        | 2.6 (7)         | 25.2 (7)        | -6.6 (7)        |
| C7   | 63.7 (9)        | 63.2 (9)        | 68.6 (9)        | 2.0 (7)         | 35.8 (7)        | 9.3 (7)         |
| C10  | 55.2 (8)        | 47.5 (8)        | 64.4 (8)        | 3.8 (6)         | 21.6 (7)        | 5.7 (6)         |
| C11  | 41.2 (7)        | 65.6 (9)        | 57.0 (8)        | -4.8 (7)        | 5.0 (6)         | 1.1 (6)         |



**Table 3 Anisotropic Displacement Parameters ( $\text{\AA}^2 \times 10^3$ ) for S25. The Anisotropic displacement factor exponent takes the form:  $-2\pi^2[h^2a^2U_{11}+2hka*b*U_{12}+...]$ .**

| Atom | $U_{11}$ | $U_{22}$ | $U_{33}$ | $U_{23}$ | $U_{13}$ | $U_{12}$ |
|------|----------|----------|----------|----------|----------|----------|
| C12  | 51.3 (7) | 54.3 (8) | 55.5 (8) | 6.2 (6)  | 11.6 (6) | 7.9 (6)  |
| C9   | 69.1 (9) | 60.9 (9) | 58.3 (9) | 13.0 (7) | 18.7 (7) | 2.4 (7)  |

**Table 4 Bond Lengths for S25.**

| Atom | Atom            | Length/ $\text{\AA}$ | Atom | Atom | Length/ $\text{\AA}$ |
|------|-----------------|----------------------|------|------|----------------------|
| N1   | C2              | 1.4539 (15)          | C6   | C5   | 1.3865 (18)          |
| N1   | C3              | 1.4730 (15)          | C6   | C7   | 1.380 (2)            |
| N1   | C4              | 1.4706 (16)          | C5   | C10  | 1.3821 (19)          |
| C2   | C3 <sup>1</sup> | 1.5109 (16)          | C8   | C7   | 1.376 (2)            |
| C2   | C11             | 1.4966 (17)          | C8   | C9   | 1.377 (2)            |
| C2   | C12             | 1.5063 (18)          | C10  | C9   | 1.385 (2)            |
| C4   | C5              | 1.5094 (17)          | C11  | C12  | 1.505 (2)            |

<sup>1</sup>1/2-X,1/2-Y,1-Z

**Table 5 Bond Angles for S25.**

| Atom | Atom | Atom            | Angle/ $^\circ$ | Atom | Atom | Atom | Angle/ $^\circ$ |
|------|------|-----------------|-----------------|------|------|------|-----------------|
| C2   | N1   | C3              | 108.82 (9)      | C7   | C6   | C5   | 120.76 (13)     |
| C2   | N1   | C4              | 112.24 (9)      | C6   | C5   | C4   | 120.78 (12)     |
| C4   | N1   | C3              | 113.39 (10)     | C10  | C5   | C4   | 120.92 (12)     |
| N1   | C2   | C3 <sup>1</sup> | 115.00 (10)     | C10  | C5   | C6   | 118.28 (12)     |
| N1   | C2   | C11             | 115.79 (11)     | C7   | C8   | C9   | 119.59 (14)     |
| N1   | C2   | C12             | 115.71 (11)     | C8   | C7   | C6   | 120.39 (14)     |
| C11  | C2   | C3 <sup>1</sup> | 120.05 (11)     | C5   | C10  | C9   | 121.04 (13)     |
| C11  | C2   | C12             | 60.17 (9)       | C2   | C11  | C12  | 60.23 (8)       |
| C12  | C2   | C3 <sup>1</sup> | 119.23 (11)     | C11  | C12  | C2   | 59.60 (9)       |

**Table 5 Bond Angles for S25.**

| Atom | Atom | Atom            | Angle/°     | Atom | Atom | Atom | Angle/°     |
|------|------|-----------------|-------------|------|------|------|-------------|
| N1   | C3   | C2 <sup>1</sup> | 113.34 (10) | C8   | C9   | C10  | 119.92 (14) |
| N1   | C4   | C5              | 112.35 (10) |      |      |      |             |

<sup>1</sup>1/2-X,1/2-Y,1-Z**Table 6 Hydrogen Atom Coordinates ( $\text{\AA}\times 10^4$ ) and Isotropic Displacement Parameters ( $\text{\AA}^2\times 10^3$ ) for S25.**

| Atom | x       | y        | z       | U(eq) |
|------|---------|----------|---------|-------|
| H3A  | 2340.7  | -224.11  | 4442.57 | 52    |
| H3AB | 2327.1  | 1623.78  | 3881.91 | 52    |
| H4A  | 4079.26 | 5017.5   | 4905.34 | 58    |
| H4AB | 3080.31 | 5653.24  | 4555.94 | 58    |
| H6   | 4299.13 | 1330.07  | 4027.63 | 67    |
| H8   | 3907.71 | 4105.38  | 2181    | 74    |
| H7   | 4475.88 | 1180.89  | 2977.63 | 74    |
| H10  | 2983.59 | 7358.31  | 3494.41 | 67    |
| H11A | 4344.46 | 3134.4   | 6444.95 | 69    |
| H11B | 4739.31 | 2317.22  | 5856.1  | 69    |
| H12A | 3474.83 | -394.18  | 6258.21 | 67    |
| H12B | 3869.85 | -1211.71 | 5669.11 | 67    |
| H9   | 3161.75 | 7205.39  | 2441.67 | 76    |

58 Y

NOMOVE FORCED

Prob = 50  
Temp = 298

PLATON-Jul 31 20:22:40 2024 - (150724)

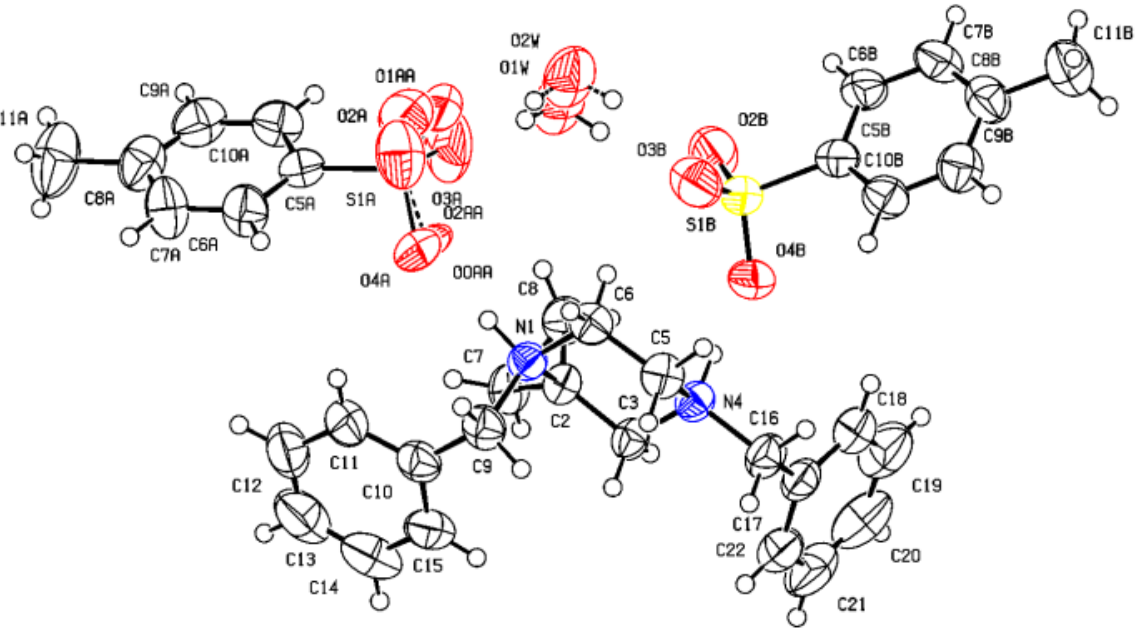

Z -127 AI11106

P 21

R = 0.05

RES= 0 117 X

**Table 1 Crystal data and structure refinement for S27 X 2TSOH X H<sub>2</sub>O.**

|                                             |                                                                              |
|---------------------------------------------|------------------------------------------------------------------------------|
| Empirical formula                           | C <sub>34</sub> H <sub>42</sub> N <sub>2</sub> O <sub>7</sub> S <sub>2</sub> |
| Formula weight                              | 654.81                                                                       |
| Temperature/K                               | 298(2)                                                                       |
| Crystal system                              | monoclinic                                                                   |
| Space group                                 | P2 <sub>1</sub>                                                              |
| a/Å                                         | 14.120(3)                                                                    |
| b/Å                                         | 9.381(2)                                                                     |
| c/Å                                         | 14.431(3)                                                                    |
| α/°                                         | 90                                                                           |
| β/°                                         | 118.580(14)                                                                  |
| γ/°                                         | 90                                                                           |
| Volume/Å <sup>3</sup>                       | 1678.5(7)                                                                    |
| Z                                           | 2                                                                            |
| ρ <sub>calc</sub> /cm <sup>3</sup>          | 1.296                                                                        |
| μ/mm <sup>-1</sup>                          | 1.847                                                                        |
| F(000)                                      | 696.0                                                                        |
| Crystal size/mm <sup>3</sup>                | 0.65 × 0.074 × 0.053                                                         |
| Radiation                                   | CuKα (λ = 1.54178)                                                           |
| 2θ range for data collection/°              | 6.976 to 144.822                                                             |
| Index ranges                                | -17 ≤ h ≤ 17, -11 ≤ k ≤ 11, -17 ≤ l ≤ 17                                     |
| Reflections collected                       | 29994                                                                        |
| Independent reflections                     | 6534 [R <sub>int</sub> = 0.1585, R <sub>sigma</sub> = 0.0952]                |
| Data/restraints/parameters                  | 6534/394/445                                                                 |
| Goodness-of-fit on F <sup>2</sup>           | 1.038                                                                        |
| Final R indexes [I ≥ 2σ (I)]                | R <sub>1</sub> = 0.0502, wR <sub>2</sub> = 0.1277                            |
| Final R indexes [all data]                  | R <sub>1</sub> = 0.0758, wR <sub>2</sub> = 0.1453                            |
| Largest diff. peak/hole / e Å <sup>-3</sup> | 0.26/-0.31                                                                   |
| Flack parameter                             | 0.038(12)                                                                    |

**Table 2 Fractional Atomic Coordinates ( $\times 10^4$ ) and Equivalent Isotropic Displacement Parameters ( $\text{\AA}^2 \times 10^3$ ) for S27 X 2TSOH X H<sub>2</sub>O.  $U_{\text{eq}}$  is defined as 1/3 of the trace of the orthogonalised  $U_{\text{ij}}$  tensor.**

| Atom | <i>x</i>    | <i>y</i>    | <i>z</i>   | $U_{\text{eq}}$ |
|------|-------------|-------------|------------|-----------------|
| N1   | 4935 (3)    | 3270 (4)    | 6951 (3)   | 44.5 (8)        |
| C2   | 3837 (3)    | 3514 (4)    | 6829 (3)   | 43.4 (9)        |
| C3   | 3037 (4)    | 2457 (5)    | 6108 (3)   | 46.1 (9)        |
| N4   | 2937 (3)    | 2546 (4)    | 5029 (3)   | 46.5 (8)        |
| C6   | 4855 (4)    | 3351 (5)    | 5879 (3)   | 51.2 (10)       |
| C5   | 4034 (4)    | 2334 (5)    | 5110 (4)   | 52.8 (10)       |
| C9   | 5506 (4)    | 1930 (5)    | 7559 (4)   | 55.6 (11)       |
| C8   | 3509 (5)    | 5027 (5)    | 6798 (4)   | 61.6 (13)       |
| C7   | 3744 (4)    | 4112 (5)    | 7738 (3)   | 57.6 (12)       |
| C10  | 5607 (4)    | 1910 (5)    | 8636 (4)   | 55.8 (11)       |
| C11  | 6427 (5)    | 2676 (6)    | 9448 (4)   | 68.4 (14)       |
| C12  | 6480 (6)    | 2766 (7)    | 10430 (4)  | 87.8 (19)       |
| C13  | 5697 (7)    | 2097 (7)    | 10591 (5)  | 97 (2)          |
| C14  | 4918 (7)    | 1309 (7)    | 9824 (5)   | 88.2 (18)       |
| C17  | 1025 (4)    | 1702 (5)    | 4141 (3)   | 55.1 (11)       |
| C16  | 2127 (4)    | 1480 (5)    | 4268 (4)   | 58.0 (11)       |
| C15  | 4875 (5)    | 1200 (6)    | 8847 (5)   | 70.3 (14)       |
| C18  | 345 (5)     | 2709 (6)    | 3436 (4)   | 69.5 (14)       |
| C19  | -673 (6)    | 2977 (8)    | 3347 (6)   | 92.0 (19)       |
| C20  | -992 (6)    | 2217 (8)    | 3962 (7)   | 97 (2)          |
| O1W  | 3767 (12)   | 9028 (10)   | 6438 (12)  | 101 (4)         |
| O2W  | 4060 (30)   | 9140 (30)   | 6110 (30)  | 101 (4)         |
| S1B  | 2557.9 (10) | 6362.0 (12) | 4061.4 (9) | 55.4 (3)        |
| S1A  | 6614.9 (11) | 6776.1 (14) | 8059.5 (9) | 63.8 (4)        |
| C21  | -346 (6)    | 1194 (8)    | 4634 (5)   | 90.2 (19)       |
| C22  | 663 (5)     | 940 (7)     | 4730 (4)   | 74.9 (16)       |

**Table 2 Fractional Atomic Coordinates ( $\times 10^4$ ) and Equivalent Isotropic Displacement Parameters ( $\text{\AA}^2 \times 10^3$ ) for S27 X 2TSOH X H<sub>2</sub>O.  $U_{\text{eq}}$  is defined as 1/3 of the trace of the orthogonalised  $U_{\text{ij}}$  tensor.**

| Atom | <i>x</i>  | <i>y</i>  | <i>z</i>  | $U(\text{eq})$ |
|------|-----------|-----------|-----------|----------------|
| O2A  | 7314 (15) | 7070 (20) | 7637 (10) | 101 (5)        |
| O3A  | 5658 (14) | 7630 (20) | 7604 (11) | 122 (6)        |
| O2B  | 2401 (4)  | 7649 (4)  | 4509 (3)  | 92.1 (15)      |
| O4A  | 6368 (16) | 5269 (13) | 8026 (8)  | 91 (4)         |
| O3B  | 3668 (3)  | 6048 (5)  | 4374 (3)  | 85.4 (13)      |
| C5A  | 7339 (4)  | 7214 (5)  | 9408 (4)  | 53.5 (11)      |
| O4B  | 2023 (3)  | 5156 (4)  | 4237 (3)  | 63.5 (9)       |
| C6A  | 8108 (4)  | 6282 (6)  | 10115 (4) | 68.9 (14)      |
| C5B  | 1904 (4)  | 6629 (5)  | 2678 (4)  | 51.0 (10)      |
| C7A  | 8700 (5)  | 6650 (8)  | 11169 (4) | 80.7 (17)      |
| C6B  | 1576 (4)  | 7967 (5)  | 2249 (4)  | 60.2 (12)      |
| C8A  | 8554 (5)  | 7933 (7)  | 11551 (5) | 74.7 (15)      |
| C7B  | 1093 (5)  | 8144 (6)  | 1173 (4)  | 67.6 (14)      |
| C9A  | 7782 (5)  | 8828 (6)  | 10836 (5) | 73.7 (15)      |
| C8B  | 917 (4)   | 7022 (6)  | 501 (4)   | 65.5 (13)      |
| C10A | 7187 (5)  | 8496 (6)  | 9783 (4)  | 65.8 (13)      |
| C9B  | 1263 (5)  | 5683 (6)  | 944 (4)   | 65.1 (13)      |
| C11A | 9232 (6)  | 8315 (12) | 12700 (5) | 113 (3)        |
| C11B | 380 (6)   | 7227 (8)  | -681 (5)  | 91 (2)         |
| C10B | 1751 (4)  | 5481 (5)  | 2020 (4)  | 58.5 (12)      |
| O0AA | 5890 (20) | 5750 (30) | 8021 (15) | 72 (6)         |
| O1AA | 6090 (20) | 8020 (20) | 7502 (18) | 95 (7)         |
| O2AA | 7404 (19) | 6290 (40) | 7762 (16) | 90 (7)         |

**Table 3 Anisotropic Displacement Parameters ( $\text{\AA}^2 \times 10^3$ ) for S27X2TSOHXH2O. The Anisotropic displacement factor exponent takes the form:  $-2\pi^2[h^2a^{*2}U_{11}+2hka^*b^*U_{12}+\dots]$ .**

| Atom | $U_{11}$  | $U_{22}$  | $U_{33}$  | $U_{23}$  | $U_{13}$  | $U_{12}$  |
|------|-----------|-----------|-----------|-----------|-----------|-----------|
| N1   | 42.3 (19) | 41.2 (18) | 47.9 (18) | 0.6 (14)  | 19.9 (15) | 1.1 (15)  |
| C2   | 40 (2)    | 44 (2)    | 46 (2)    | -5.8 (16) | 20.9 (17) | 2.3 (17)  |
| C3   | 45 (2)    | 52 (2)    | 42 (2)    | -7.8 (17) | 21.3 (17) | -5.3 (18) |
| N4   | 49 (2)    | 44.7 (19) | 46.4 (18) | -7.5 (14) | 23.7 (16) | -3.4 (15) |
| C6   | 49 (3)    | 55 (3)    | 55 (2)    | 2.5 (19)  | 29 (2)    | 3 (2)     |
| C5   | 54 (3)    | 57 (3)    | 54 (2)    | -6.0 (19) | 31 (2)    | 4 (2)     |
| C9   | 54 (3)    | 50 (2)    | 58 (2)    | 4 (2)     | 22 (2)    | 12 (2)    |
| C8   | 69 (3)    | 46 (3)    | 62 (3)    | -7 (2)    | 25 (2)    | 12 (2)    |
| C7   | 60 (3)    | 65 (3)    | 47 (2)    | -9 (2)    | 25 (2)    | 6 (2)     |
| C10  | 59 (3)    | 46 (2)    | 58 (2)    | 10 (2)    | 24 (2)    | 11 (2)    |
| C11  | 67 (3)    | 63 (3)    | 58 (3)    | 10 (2)    | 17 (2)    | 5 (3)     |
| C12  | 108 (5)   | 78 (4)    | 50 (3)    | 2 (3)     | 16 (3)    | 6 (4)     |
| C13  | 144 (7)   | 83 (5)    | 69 (4)    | 18 (3)    | 55 (4)    | 18 (4)    |
| C14  | 120 (5)   | 72 (4)    | 91 (4)    | 28 (3)    | 66 (4)    | 15 (4)    |
| C17  | 54 (3)    | 56 (3)    | 50 (2)    | -13 (2)   | 21.0 (19) | -16 (2)   |
| C16  | 63 (3)    | 54 (3)    | 52 (2)    | -15 (2)   | 24 (2)    | -11 (2)   |
| C15  | 78 (4)    | 56 (3)    | 76 (3)    | 15 (3)    | 36 (3)    | -2 (3)    |
| C18  | 58 (3)    | 74 (3)    | 63 (3)    | -2 (2)    | 18 (2)    | -15 (3)   |
| C19  | 62 (4)    | 85 (5)    | 111 (5)   | -13 (4)   | 27 (3)    | -9 (3)    |
| C20  | 71 (4)    | 92 (5)    | 131 (6)   | -39 (4)   | 52 (4)    | -27 (3)   |
| O1W  | 103 (7)   | 62 (3)    | 99 (7)    | -22 (4)   | 17 (4)    | 11 (4)    |
| O2W  | 103 (7)   | 62 (3)    | 99 (7)    | -22 (4)   | 17 (4)    | 11 (4)    |
| S1B  | 56.5 (7)  | 48.3 (6)  | 55.2 (6)  | 4.8 (4)   | 21.6 (5)  | -4.5 (5)  |
| S1A  | 69.6 (8)  | 60.4 (8)  | 51.9 (6)  | 0.1 (5)   | 21.5 (6)  | -11.7 (6) |
| C21  | 84 (4)    | 112 (5)   | 88 (4)    | -34 (4)   | 52 (3)    | -50 (4)   |
| C22  | 77 (4)    | 77 (4)    | 65 (3)    | -9 (3)    | 29 (3)    | -30 (3)   |
| O2A  | 126 (8)   | 125 (10)  | 71 (5)    | -19 (6)   | 62 (5)    | -56 (7)   |
| O3A  | 82 (8)    | 116 (10)  | 98 (6)    | 0 (7)     | -14 (6)   | 36 (7)    |

**Table 3 Anisotropic Displacement Parameters ( $\text{\AA}^2 \times 10^3$ ) for S27X2TSOHXH2O. The Anisotropic displacement factor exponent takes the form:  $-2\pi^2[h^2a^{*2}U_{11}+2hka^*b^*U_{12}+\dots]$ .**

| Atom | $U_{11}$ | $U_{22}$ | $U_{33}$ | $U_{23}$  | $U_{13}$  | $U_{12}$  |
|------|----------|----------|----------|-----------|-----------|-----------|
| O2B  | 133 (4)  | 58 (2)   | 63 (2)   | -6.9 (18) | 29 (2)    | 5 (2)     |
| O4A  | 103 (9)  | 56 (5)   | 76 (4)   | -4 (4)    | 13 (5)    | -32 (5)   |
| O3B  | 46 (2)   | 109 (3)  | 91 (3)   | 38 (2)    | 24.4 (18) | 2 (2)     |
| C5A  | 54 (3)   | 48 (3)   | 63 (3)   | -0.3 (19) | 32 (2)    | -5 (2)    |
| O4B  | 64 (2)   | 63 (2)   | 64 (2)   | 9.9 (16)  | 32.0 (17) | -9.5 (17) |
| C6A  | 67 (3)   | 60 (3)   | 67 (3)   | -3 (2)    | 22 (2)    | 16 (3)    |
| C5B  | 49 (2)   | 45 (2)   | 61 (2)   | 6.2 (19)  | 27.7 (19) | 0.5 (19)  |
| C7A  | 64 (3)   | 105 (5)  | 58 (3)   | 0 (3)     | 17 (2)    | 19 (3)    |
| C6B  | 72 (3)   | 45 (3)   | 63 (3)   | 0 (2)     | 32 (3)    | -2 (2)    |
| C8A  | 70 (4)   | 98 (4)   | 65 (3)   | -23 (3)   | 40 (3)    | -18 (3)   |
| C7B  | 78 (4)   | 56 (3)   | 67 (3)   | 18 (2)    | 33 (3)    | 7 (3)     |
| C9A  | 90 (4)   | 68 (3)   | 80 (3)   | -20 (3)   | 55 (3)    | -12 (3)   |
| C8B  | 63 (3)   | 79 (3)   | 56 (3)   | 12 (2)    | 30 (2)    | 3 (3)     |
| C10A | 74 (4)   | 58 (3)   | 73 (3)   | 0 (2)     | 42 (3)    | 5 (3)     |
| C9B  | 68 (4)   | 70 (3)   | 60 (3)   | -6 (2)    | 33 (2)    | 0 (3)     |
| C11A | 92 (5)   | 171 (7)  | 73 (4)   | -43 (4)   | 37 (4)    | -20 (5)   |
| C11B | 97 (5)   | 108 (5)  | 60 (3)   | 10 (3)    | 30 (3)    | -2 (4)    |
| C10B | 62 (3)   | 48 (3)   | 64 (3)   | 4 (2)     | 30 (2)    | 8 (2)     |
| O0AA | 73 (11)  | 59 (10)  | 79 (8)   | -13 (7)   | 34 (8)    | -37 (8)   |
| O1AA | 83 (12)  | 69 (9)   | 77 (8)   | 10 (6)    | -6 (9)    | -20 (7)   |
| O2AA | 86 (10)  | 135 (18) | 59 (8)   | -14 (11)  | 43 (7)    | 13 (11)   |

**Table 4 Bond Lengths for S27X2TSOHXH2O.**

| Atom | Atom | Length/ $\text{\AA}$ | Atom | Atom | Length/ $\text{\AA}$ |
|------|------|----------------------|------|------|----------------------|
| N1   | C2   | 1.493 (5)            | S1B  | O3B  | 1.439 (4)            |
| N1   | C6   | 1.497 (5)            | S1B  | O4B  | 1.448 (3)            |
| N1   | C9   | 1.524 (6)            | S1B  | C5B  | 1.771 (5)            |



**Table 4 Bond Lengths for S27X2TSOHXH2O.**

| Atom | Atom | Length/Å   | Atom | Atom | Length/Å   |
|------|------|------------|------|------|------------|
| C2   | C3   | 1.489 (6)  | S1A  | O2A  | 1.413 (12) |
| C2   | C8   | 1.487 (6)  | S1A  | O3A  | 1.429 (10) |
| C2   | C7   | 1.488 (6)  | S1A  | O4A  | 1.451 (9)  |
| C3   | N4   | 1.497 (5)  | S1A  | C5A  | 1.760 (5)  |
| N4   | C5   | 1.510 (6)  | S1A  | O0AA | 1.392 (15) |
| N4   | C16  | 1.520 (5)  | S1A  | O1AA | 1.41 (2)   |
| C6   | C5   | 1.502 (6)  | S1A  | O2AA | 1.446 (19) |
| C9   | C10  | 1.491 (7)  | C21  | C22  | 1.385 (9)  |
| C8   | C7   | 1.502 (7)  | C5A  | C6A  | 1.388 (7)  |
| C10  | C11  | 1.389 (7)  | C5A  | C10A | 1.377 (7)  |
| C10  | C15  | 1.381 (7)  | C6A  | C7A  | 1.384 (7)  |
| C11  | C12  | 1.386 (8)  | C5B  | C6B  | 1.378 (7)  |
| C12  | C13  | 1.383 (10) | C5B  | C10B | 1.384 (7)  |
| C13  | C14  | 1.348 (10) | C7A  | C8A  | 1.380 (9)  |
| C14  | C15  | 1.386 (8)  | C6B  | C7B  | 1.374 (7)  |
| C17  | C16  | 1.493 (7)  | C8A  | C9A  | 1.372 (9)  |
| C17  | C18  | 1.384 (8)  | C8A  | C11A | 1.508 (8)  |
| C17  | C22  | 1.381 (7)  | C7B  | C8B  | 1.371 (8)  |
| C18  | C19  | 1.403 (9)  | C9A  | C10A | 1.375 (8)  |
| C19  | C20  | 1.371 (11) | C8B  | C9B  | 1.388 (8)  |
| C20  | C21  | 1.359 (10) | C8B  | C11B | 1.512 (7)  |
| S1B  | O2B  | 1.436 (4)  | C9B  | C10B | 1.377 (7)  |

**Table 5 Bond Angles for S27X2TSOHXH2O.**

| Atom | Atom | Atom | Angle/°   | Atom | Atom | Atom | Angle/°   |
|------|------|------|-----------|------|------|------|-----------|
| C2   | N1   | C6   | 108.0 (3) | O3B  | S1B  | C5B  | 106.6 (2) |
| C2   | N1   | C9   | 115.3 (3) | O4B  | S1B  | C5B  | 105.8 (2) |
| C6   | N1   | C9   | 113.3 (3) | O2A  | S1A  | O3A  | 113.3 (8) |

**Table 5 Bond Angles for S27X2TSOHXH2O.**

| Atom | Atom | Atom | Angle/°   | Atom | Atom | Atom | Angle/°    |
|------|------|------|-----------|------|------|------|------------|
| C3   | C2   | N1   | 112.2 (3) | O2A  | S1A  | O4A  | 112.4 (7)  |
| C8   | C2   | N1   | 116.1 (4) | O2A  | S1A  | C5A  | 106.0 (5)  |
| C8   | C2   | C3   | 119.5 (4) | O3A  | S1A  | O4A  | 111.6 (7)  |
| C8   | C2   | C7   | 60.7 (3)  | O3A  | S1A  | C5A  | 107.4 (6)  |
| C7   | C2   | N1   | 118.6 (4) | O4A  | S1A  | C5A  | 105.5 (4)  |
| C7   | C2   | C3   | 120.7 (4) | O0AA | S1A  | C5A  | 103.5 (8)  |
| C2   | C3   | N4   | 110.7 (3) | O0AA | S1A  | O1AA | 111.9 (11) |
| C3   | N4   | C5   | 109.2 (3) | O0AA | S1A  | O2AA | 115.4 (12) |
| C3   | N4   | C16  | 112.3 (3) | O1AA | S1A  | C5A  | 107.9 (10) |
| C5   | N4   | C16  | 111.0 (3) | O1AA | S1A  | O2AA | 111.1 (14) |
| N1   | C6   | C5   | 112.4 (4) | O2AA | S1A  | C5A  | 106.2 (9)  |
| C6   | C5   | N4   | 112.0 (4) | C20  | C21  | C22  | 120.0 (7)  |
| C10  | C9   | N1   | 111.8 (4) | C17  | C22  | C21  | 121.0 (6)  |
| C2   | C8   | C7   | 59.7 (3)  | C6A  | C5A  | S1A  | 120.1 (4)  |
| C2   | C7   | C8   | 59.6 (3)  | C10A | C5A  | S1A  | 121.4 (4)  |
| C11  | C10  | C9   | 119.9 (5) | C10A | C5A  | C6A  | 118.4 (5)  |
| C15  | C10  | C9   | 121.8 (5) | C7A  | C6A  | C5A  | 120.0 (5)  |
| C15  | C10  | C11  | 118.2 (5) | C6B  | C5B  | S1B  | 121.2 (4)  |
| C12  | C11  | C10  | 120.7 (6) | C6B  | C5B  | C10B | 119.4 (4)  |
| C13  | C12  | C11  | 119.2 (6) | C10B | C5B  | S1B  | 119.3 (3)  |
| C14  | C13  | C12  | 121.0 (6) | C8A  | C7A  | C6A  | 122.0 (6)  |
| C13  | C14  | C15  | 119.8 (7) | C7B  | C6B  | C5B  | 119.8 (5)  |
| C18  | C17  | C16  | 120.1 (5) | C7A  | C8A  | C11A | 120.6 (7)  |
| C22  | C17  | C16  | 121.5 (5) | C9A  | C8A  | C7A  | 116.8 (5)  |
| C22  | C17  | C18  | 118.4 (5) | C9A  | C8A  | C11A | 122.6 (6)  |
| C17  | C16  | N4   | 112.1 (4) | C8B  | C7B  | C6B  | 122.0 (5)  |
| C10  | C15  | C14  | 121.1 (6) | C8A  | C9A  | C10A | 122.5 (5)  |
| C17  | C18  | C19  | 120.6 (6) | C7B  | C8B  | C9B  | 117.7 (4)  |
| C20  | C19  | C18  | 119.1 (7) | C7B  | C8B  | C11B | 121.6 (5)  |

**Table 5 Bond Angles for S27X2TSOHXH2O.**

| Atom Atom Atom | Angle/°   | Atom Atom Atom | Angle/°   |
|----------------|-----------|----------------|-----------|
| C21 C20 C19    | 120.9 (7) | C9B C8B C11B   | 120.7 (6) |
| O2B S1B O3B    | 114.2 (3) | C9A C10A C5A   | 120.3 (5) |
| O2B S1B O4B    | 111.9 (3) | C10B C9B C8B   | 121.3 (5) |
| O2B S1B C5B    | 106.2 (2) | C9B C10B C5B   | 119.8 (5) |
| O3B S1B O4B    | 111.5 (2) |                |           |

**Table 6 Hydrogen Atom Coordinates ( $\text{\AA}\times 10^4$ ) and Isotropic Displacement Parameters ( $\text{\AA}^2\times 10^3$ ) for S27X2TSOHXH2O.**

| Atom | x       | y       | z        | U(eq) |
|------|---------|---------|----------|-------|
| H1   | 5379.83 | 4079.96 | 7354.63  | 53    |
| H3A  | 2340.75 | 2640.23 | 6064.16  | 55    |
| H3B  | 3262.74 | 1504.62 | 6388.52  | 55    |
| H4   | 2686.3  | 3505.95 | 4752.65  | 56    |
| H6A  | 5554.17 | 3139.16 | 5938.59  | 61    |
| H6B  | 4661.88 | 4315.49 | 5611.19  | 61    |
| H5A  | 4272.09 | 1363.55 | 5332.66  | 63    |
| H5B  | 3980.33 | 2469.31 | 4420.2   | 63    |
| H9A  | 5104.56 | 1097.84 | 7171.33  | 67    |
| H9B  | 6218.81 | 1881.73 | 7618.22  | 67    |
| H8A  | 2762.24 | 5272.72 | 6325.48  | 74    |
| H8B  | 4028.12 | 5759.57 | 6880.28  | 74    |
| H7A  | 4404.74 | 4292.66 | 8386.64  | 69    |
| H7B  | 3138.78 | 3805.78 | 7831.8   | 69    |
| H11  | 6944.8  | 3132.28 | 9331     | 82    |
| H12  | 7034.27 | 3270.19 | 10974.41 | 105   |
| H13  | 5709.38 | 2192.76 | 11238.03 | 116   |
| H14  | 4410.02 | 840.65  | 9950.63  | 106   |
| H16A | 2098.26 | 1569.91 | 3584.96  | 70    |

**Table 6 Hydrogen Atom Coordinates ( $\text{\AA}\times 10^4$ ) and Isotropic Displacement Parameters ( $\text{\AA}^2\times 10^3$ ) for S27X2TSOHXH2O.**

| Atom | <i>x</i> | <i>y</i> | <i>z</i> | U(eq) |
|------|----------|----------|----------|-------|
| H16B | 2367.18  | 521.59   | 4525.35  | 70    |
| H15  | 4344.76  | 638.89   | 8325.31  | 84    |
| H18  | 564.56   | 3213.08  | 3016.9   | 83    |
| H19  | -1125.5  | 3660.32  | 2876.86  | 110   |
| H20  | -1658.45 | 2404.81  | 3918.33  | 116   |
| H1WA | 4336.22  | 8542.28  | 6794.52  | 152   |
| H1WB | 3334.58  | 8451.64  | 5974.37  | 152   |
| H2WA | 4554.64  | 8595.48  | 6540.99  | 152   |
| H2WB | 3665.7   | 8596.32  | 5591.74  | 152   |
| H21  | -581.25  | 665.55   | 5030.49  | 108   |
| H22  | 1103.94  | 244.87   | 5196.64  | 90    |
| H6AA | 8224.97  | 5409.23  | 9880.64  | 83    |
| H7AA | 9212.51  | 6013.26  | 11633.36 | 97    |
| H6BA | 1680.41  | 8747.52  | 2684.83  | 72    |
| H7BA | 880.32   | 9053.07  | 893      | 81    |
| H9AA | 7656.03  | 9692.98  | 11073.26 | 88    |
| H10A | 6679.7   | 9140.08  | 9322.05  | 79    |
| H9BA | 1162.46  | 4906.38  | 505.89   | 78    |
| H11A | 9173.63  | 9318.76  | 12791.27 | 169   |
| H11B | 9971.93  | 8076.17  | 12925.77 | 169   |
| H11C | 8982.31  | 7792.83  | 13113.07 | 169   |
| H11D | -280.16  | 6692     | -1007.89 | 137   |
| H11E | 852.65   | 6899     | -940.93  | 137   |
| H11F | 225.12   | 8219.79  | -844.46  | 137   |
| H10B | 1977.23  | 4575.41  | 2302.23  | 70    |

**Table 7 Atomic Occupancy for S27 X 2TSOH X H<sub>2</sub>O.**

| <b>Atom</b> | <b>Occupancy</b> | <b>Atom</b> | <b>Occupancy</b> | <b>Atom</b> | <b>Occupancy</b> |
|-------------|------------------|-------------|------------------|-------------|------------------|
| O1W         | 0.74 (3)         | H1WA        | 0.74 (3)         | H1WB        | 0.74 (3)         |
| O2W         | 0.26 (3)         | H2WA        | 0.26 (3)         | H2WB        | 0.26 (3)         |
| O2A         | 0.66 (3)         | O3A         | 0.66 (3)         | O4A         | 0.66 (3)         |
| O0AA        | 0.34 (3)         | O1AA        | 0.34 (3)         | O2AA        | 0.34 (3)         |

### 3. Supplemental Information References

1. *Org. Lett.*, **2004**, 6, 26, 4961-4963
2. *Angew. Chem. Int. Ed.* **2020**, 59, 11339 – 11344
3. *Tet. Lett.* **1998**, 39, 5323-5326
4. *Angew. Chem. Int. Ed.* **2015**, 54, 11826–11829
5. *Tet. Lett.* **2001**, 42, 7015–7018
6. Sheldrick, G. M., SHELXT - Integrated space-group and crystal-structure determination. *Acta Cryst. Sect. A* **2015**, A71, 3-8. 6.
7. Sheldrick, G. M. "Crystal structure refinement with SHELXL." *Acta Cryst Sect. C: Structural Chemistry* 71, 1, **2015**, 3-8

#### 4. Characterization Data: NMR Spectra

Compound **S1**  $^1\text{H}$  NMR (800 MHz,  $d_6$ -Acetone)

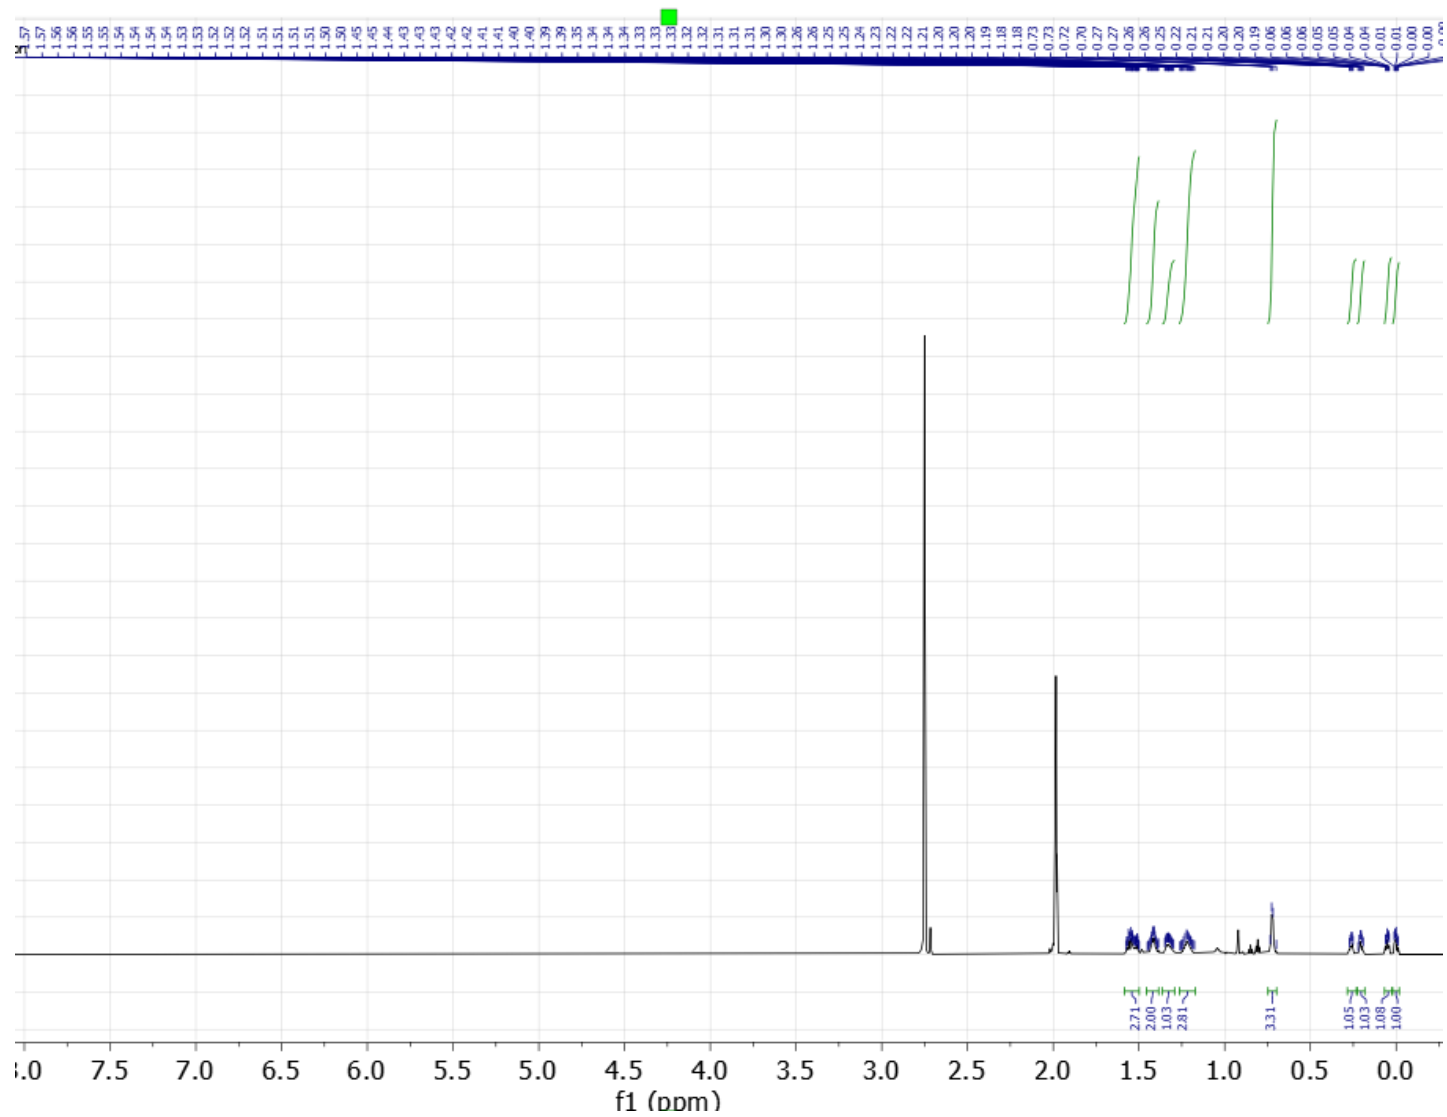

Compound **S1**  $^{13}\text{C}$  NMR (201 MHz,  $d_6$ -Acetone)

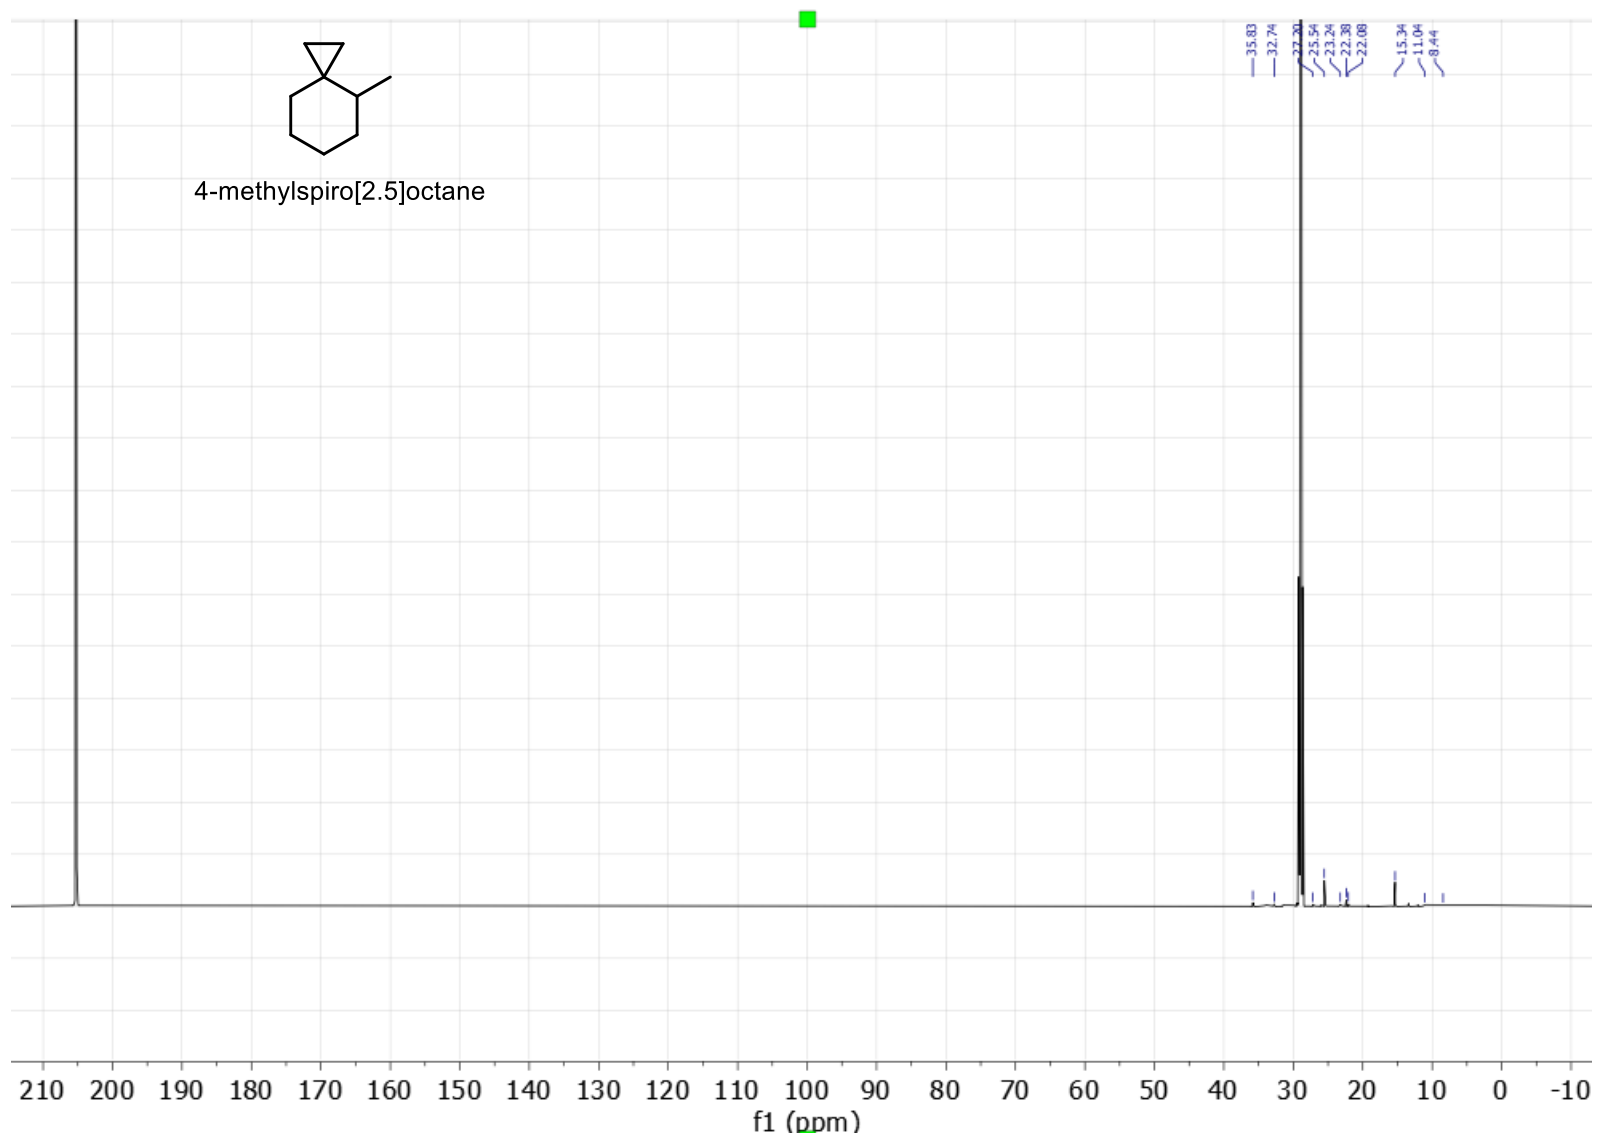



Compound S2  $^1\text{H}$  NMR (500 MHz,  $d_6$ -Acetone)

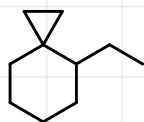

4-ethylspiro[2.5]octane

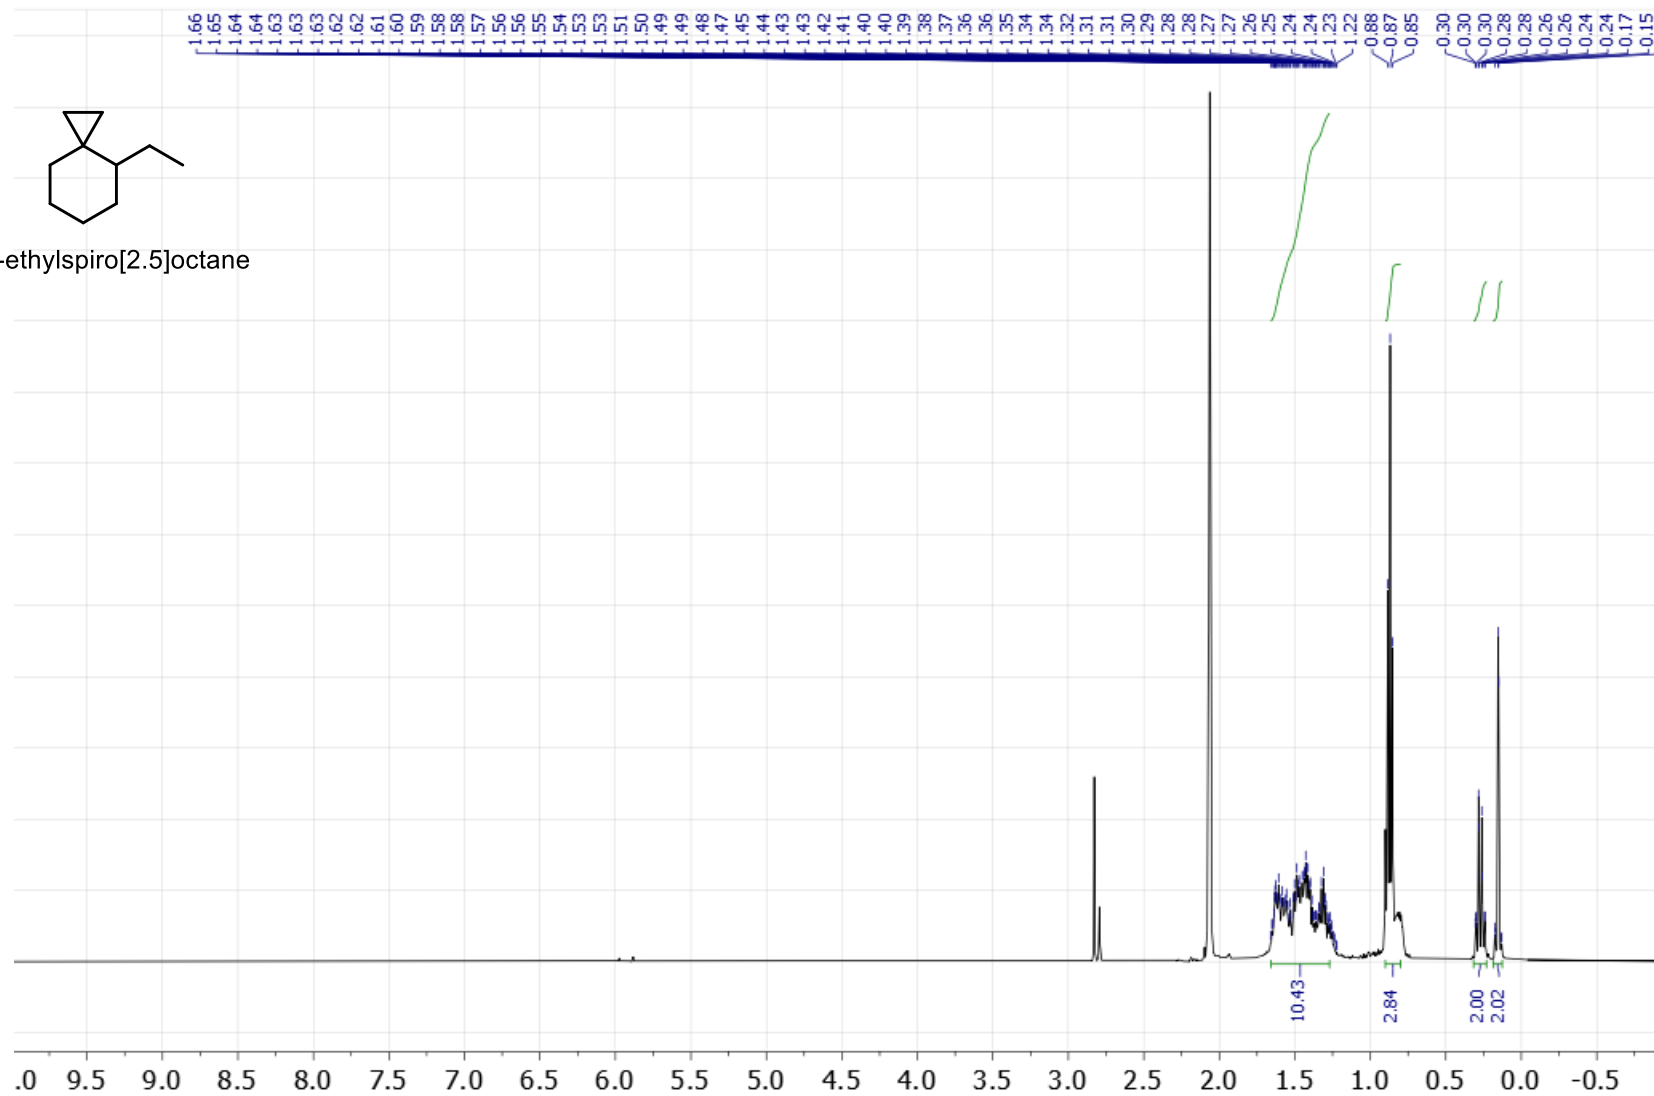

Compound S2  $^{13}\text{C}$  NMR (126 MHz,  $d_6$ -Acetone)

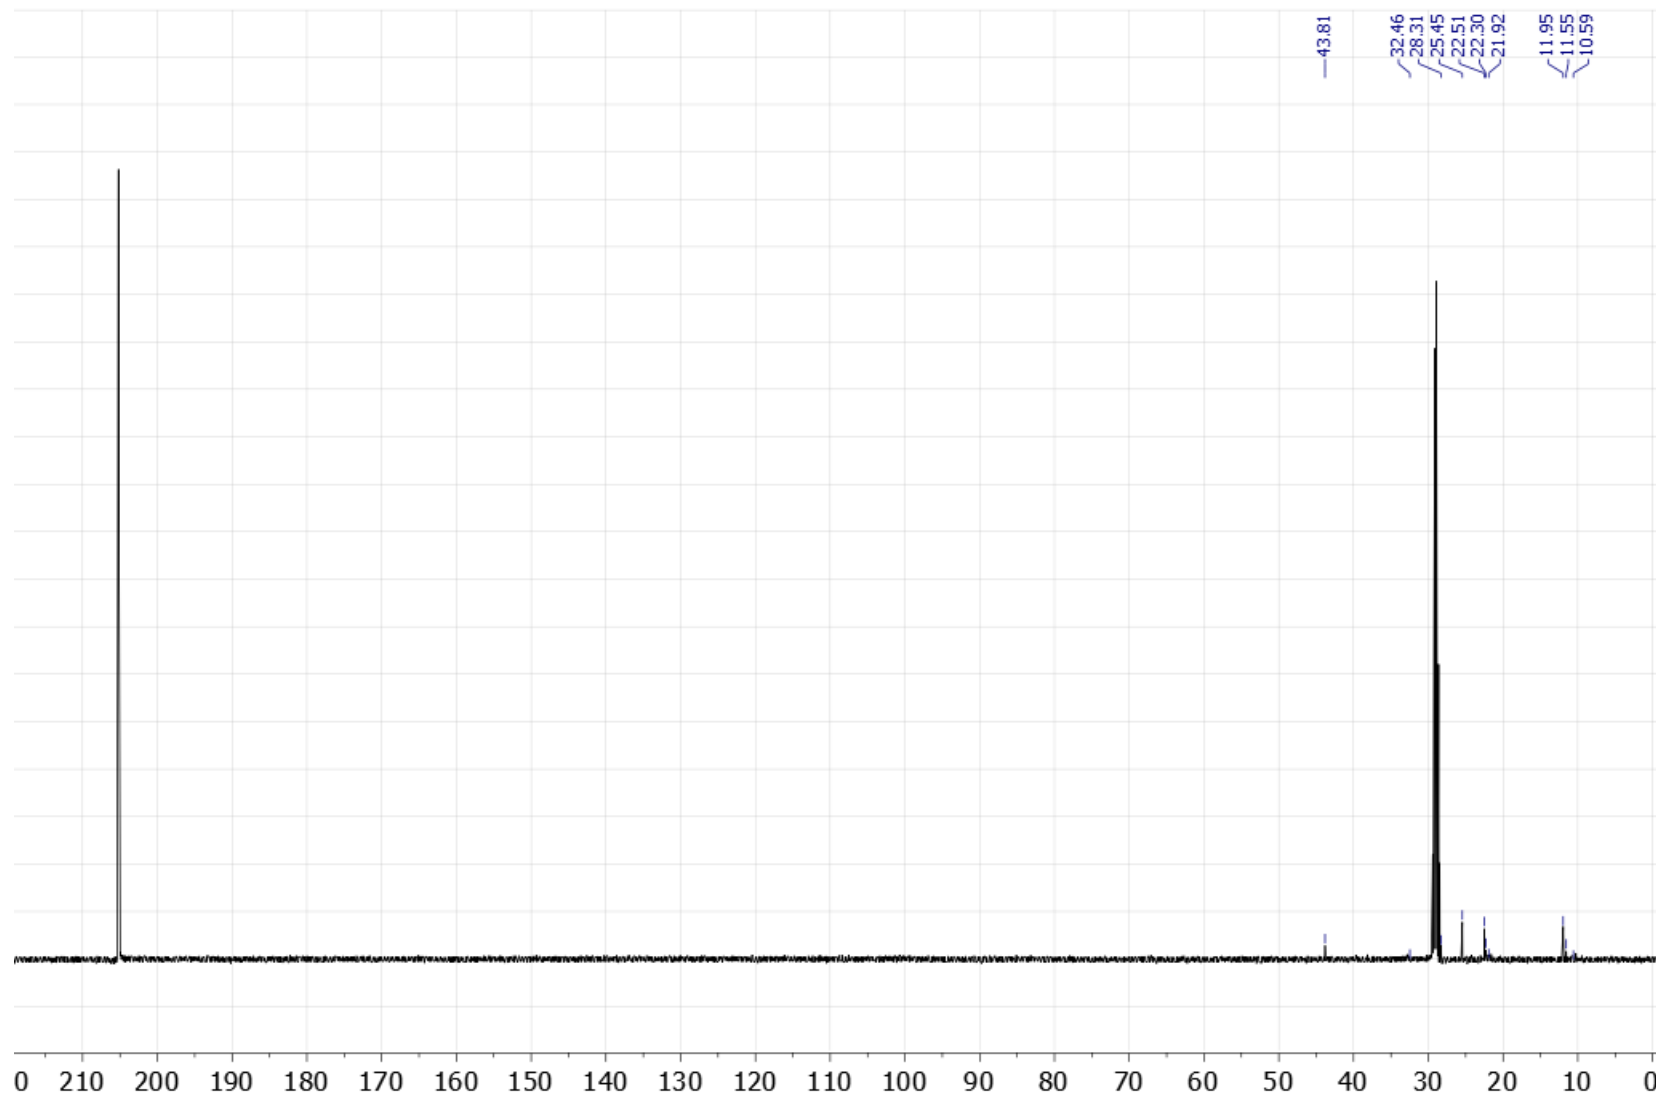

Compound S2 HSQC (500 MHz,  $d_6$ -Acetone)

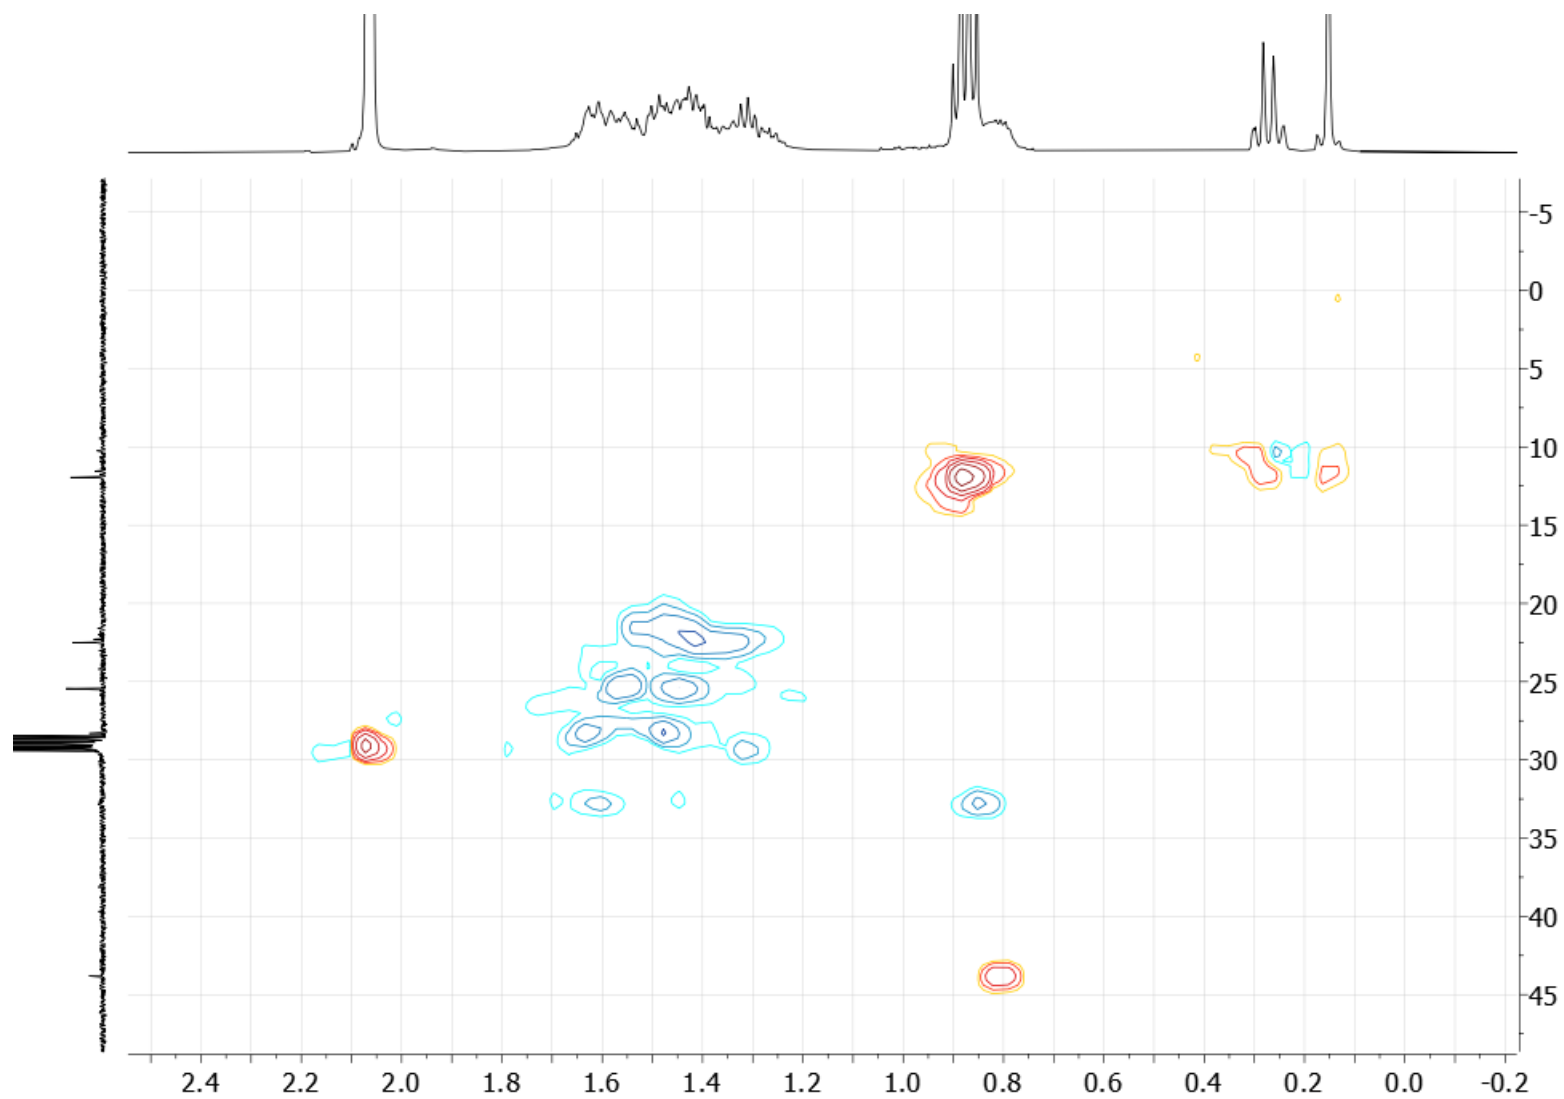

Compound **S3**  $^1\text{H}$  NMR (500 MHz,  $d_6$ -Acetone)

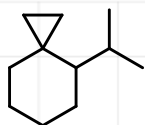

4-isopropylspiro[2.5]octane

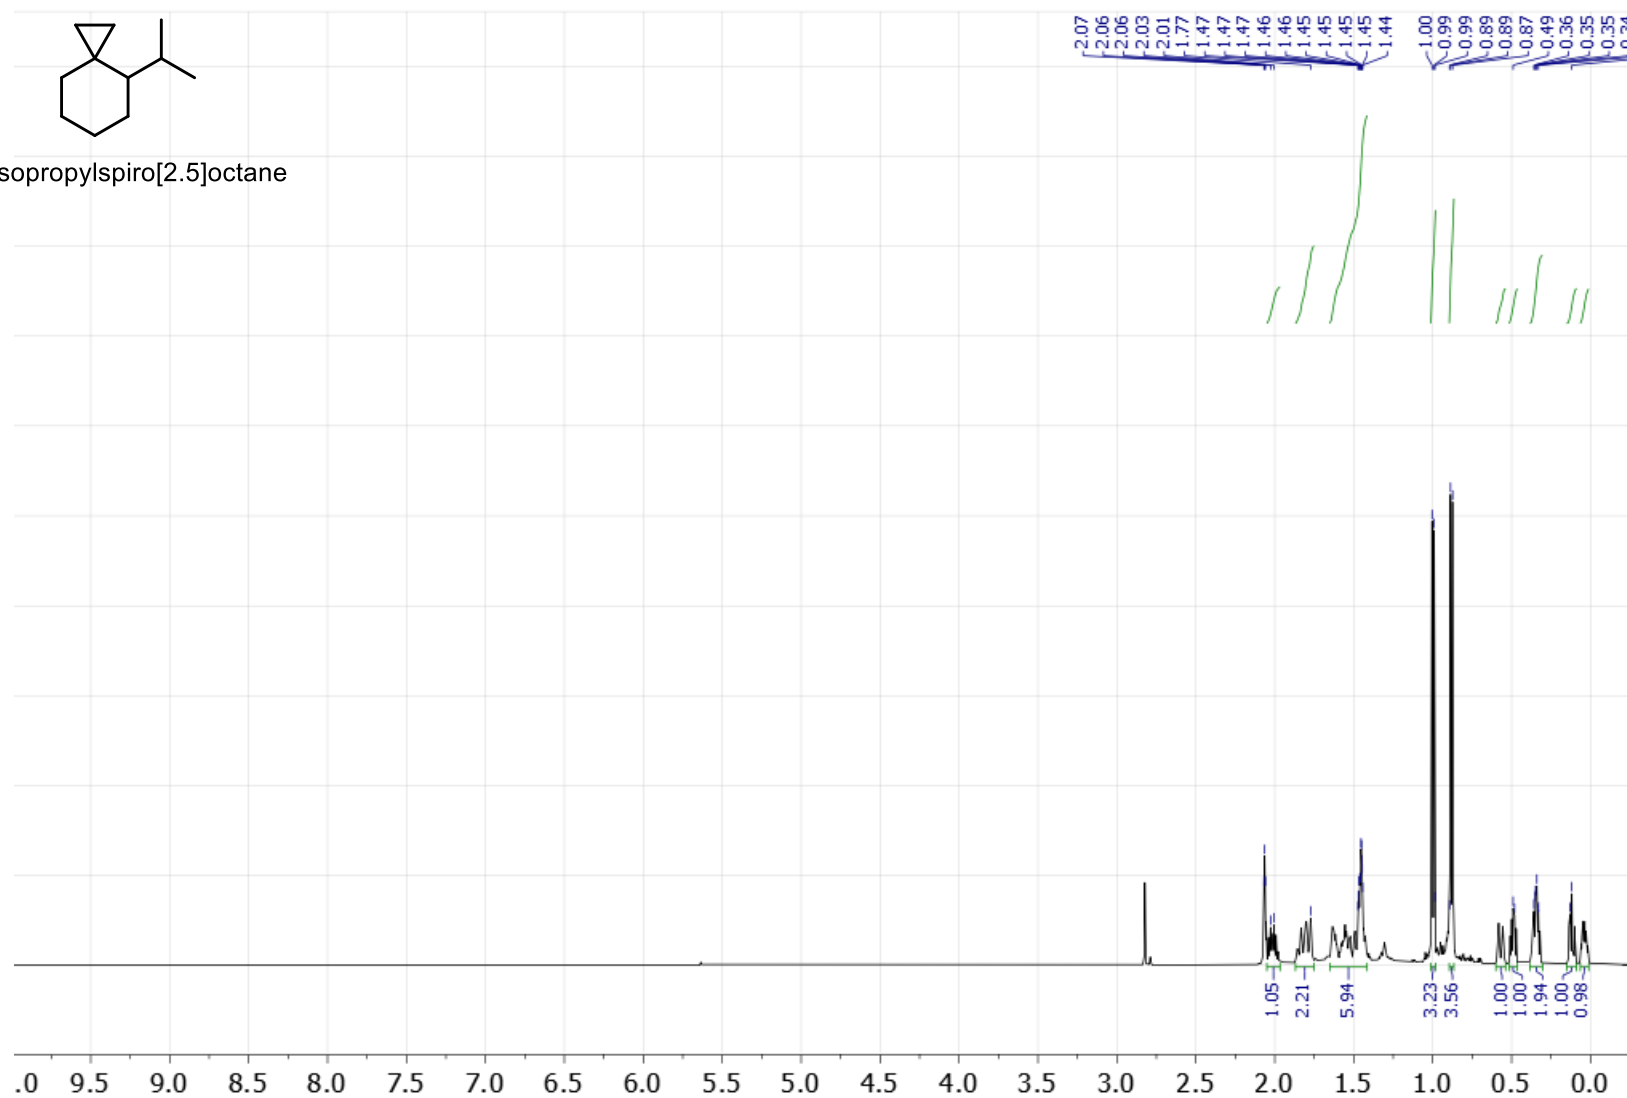

Compound **S3**  $^{13}\text{C}$  NMR (126 MHz,  $d_6$ -Acetone)

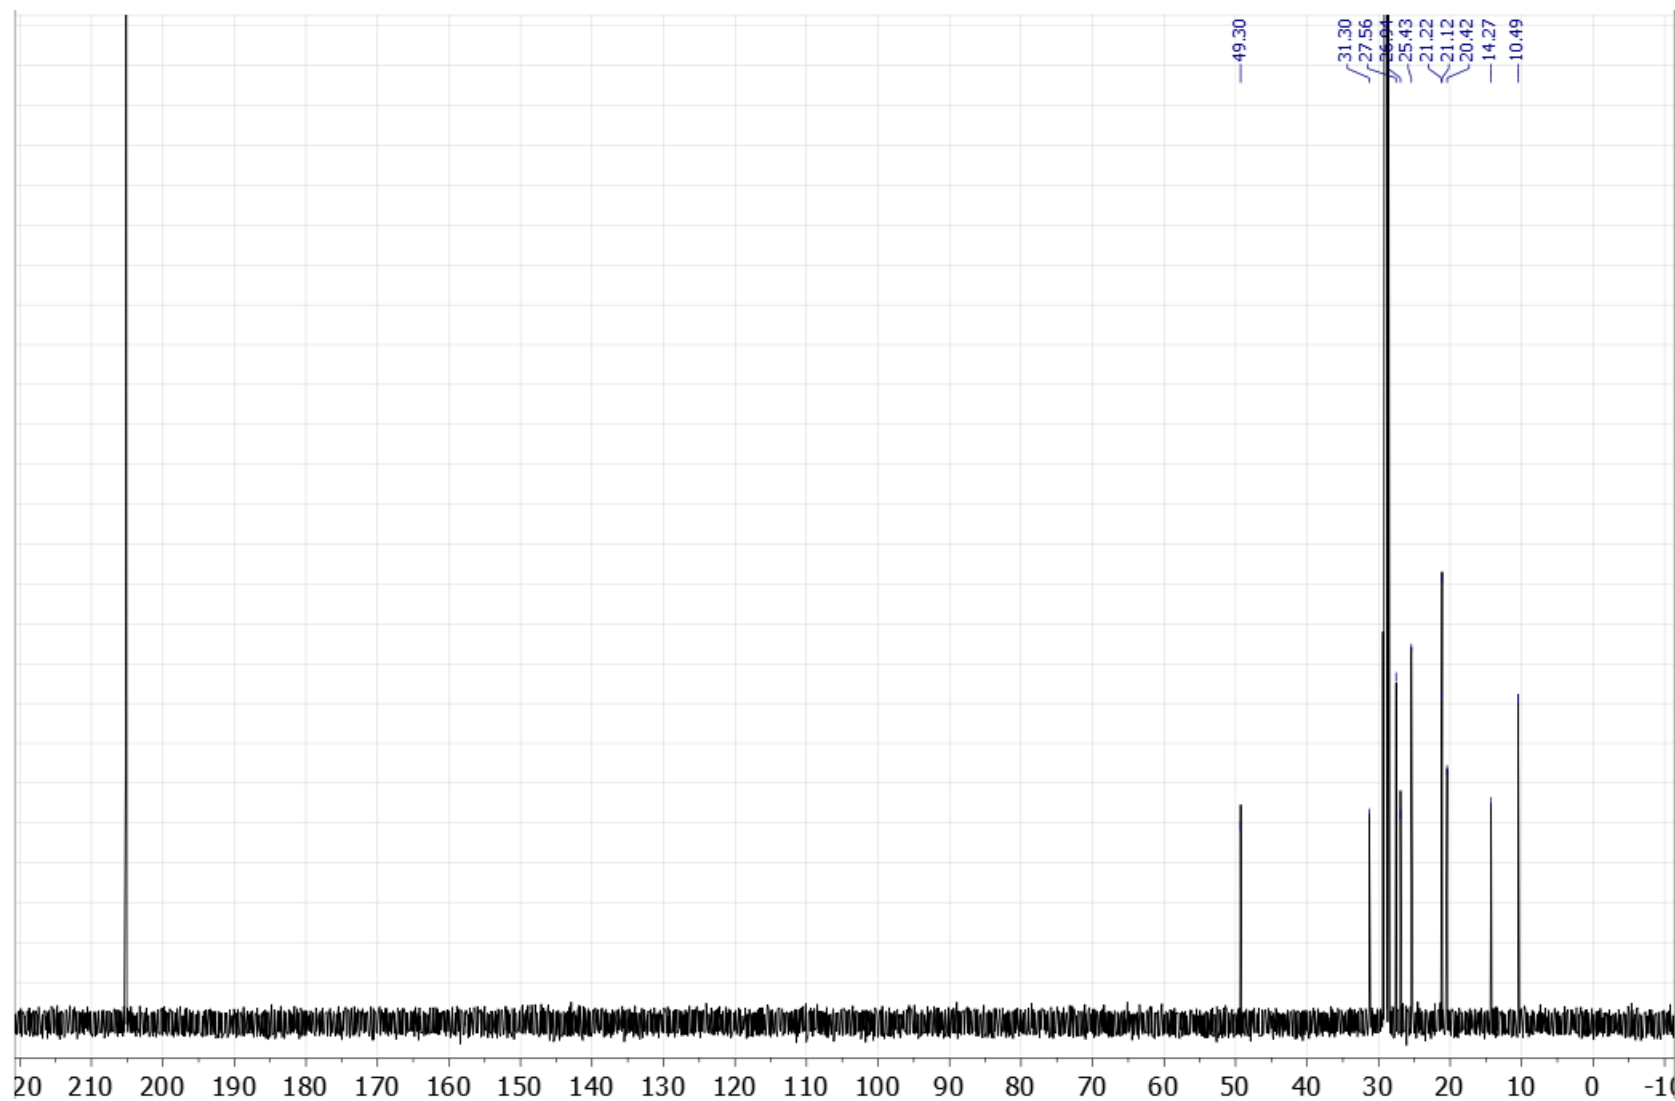

Compound S3 HSQC (500 MHz,  $d_6$ -Acetone)

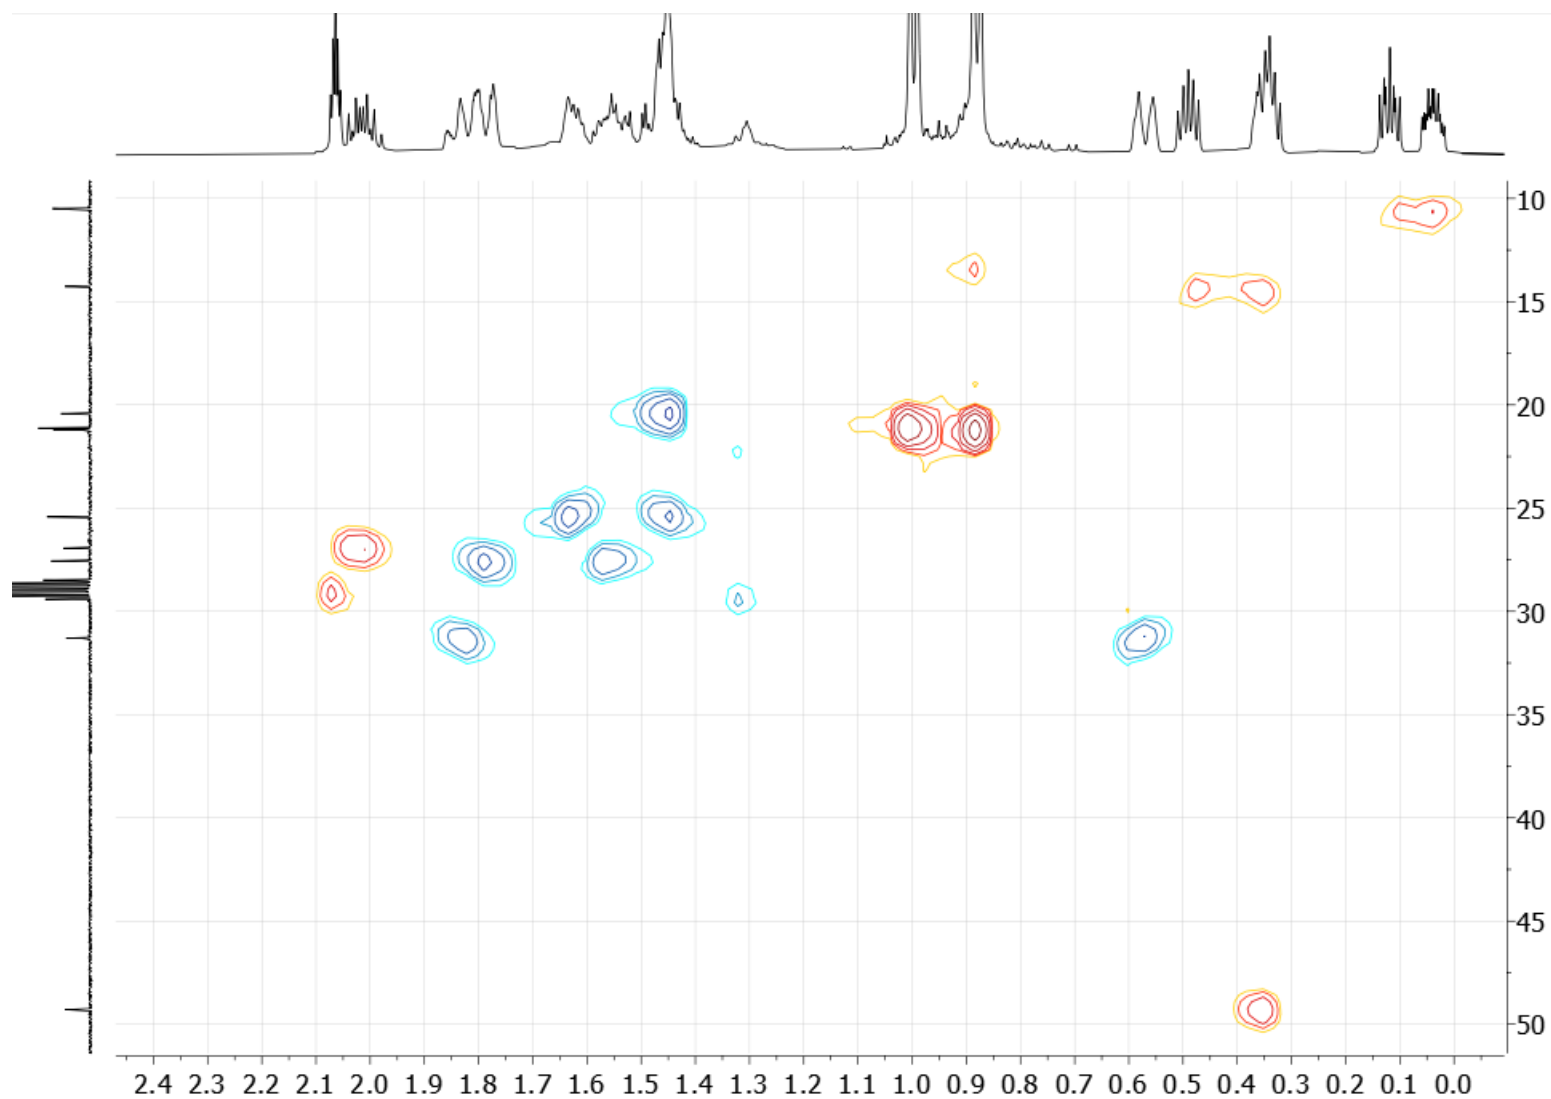

Compound S4  $^1\text{H}$  NMR (500 MHz,  $\text{CDCl}_3$ )

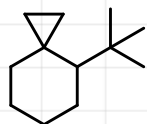

4-(*tert*-butyl)spiro[2.5]octane

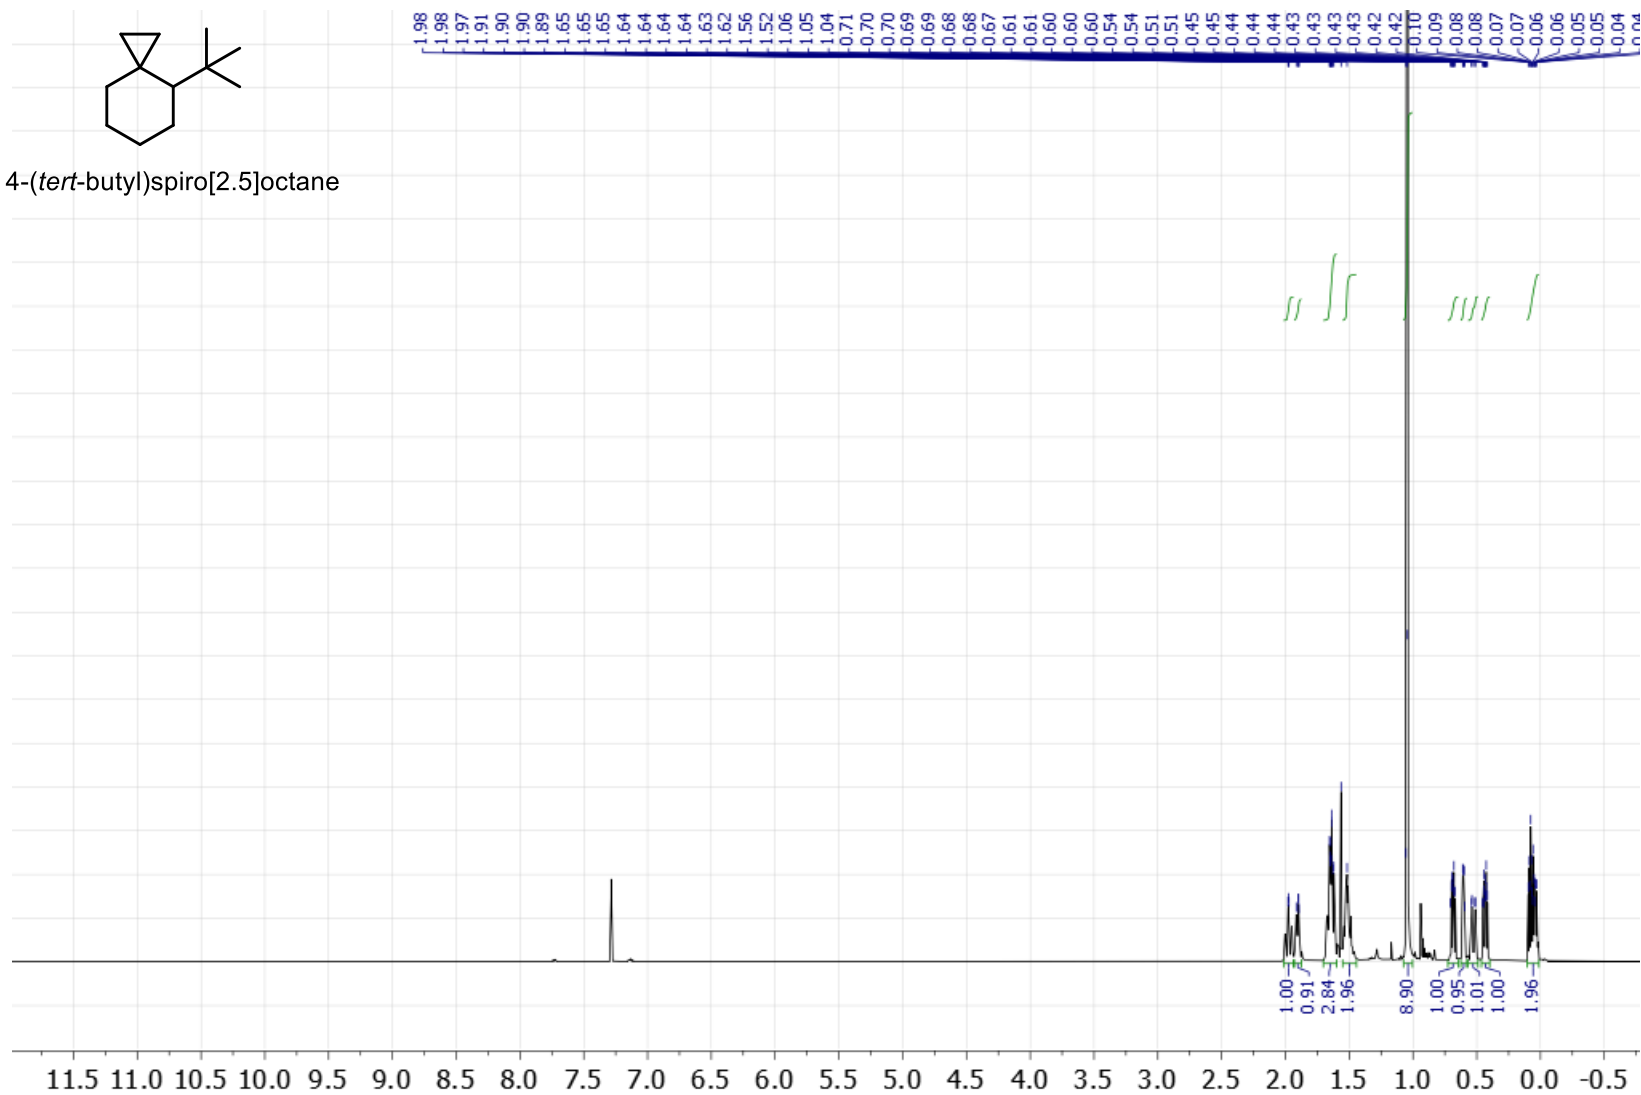

Compound **S4**  $^{13}\text{C}$  NMR (126 MHz,  $\text{CDCl}_3$ )

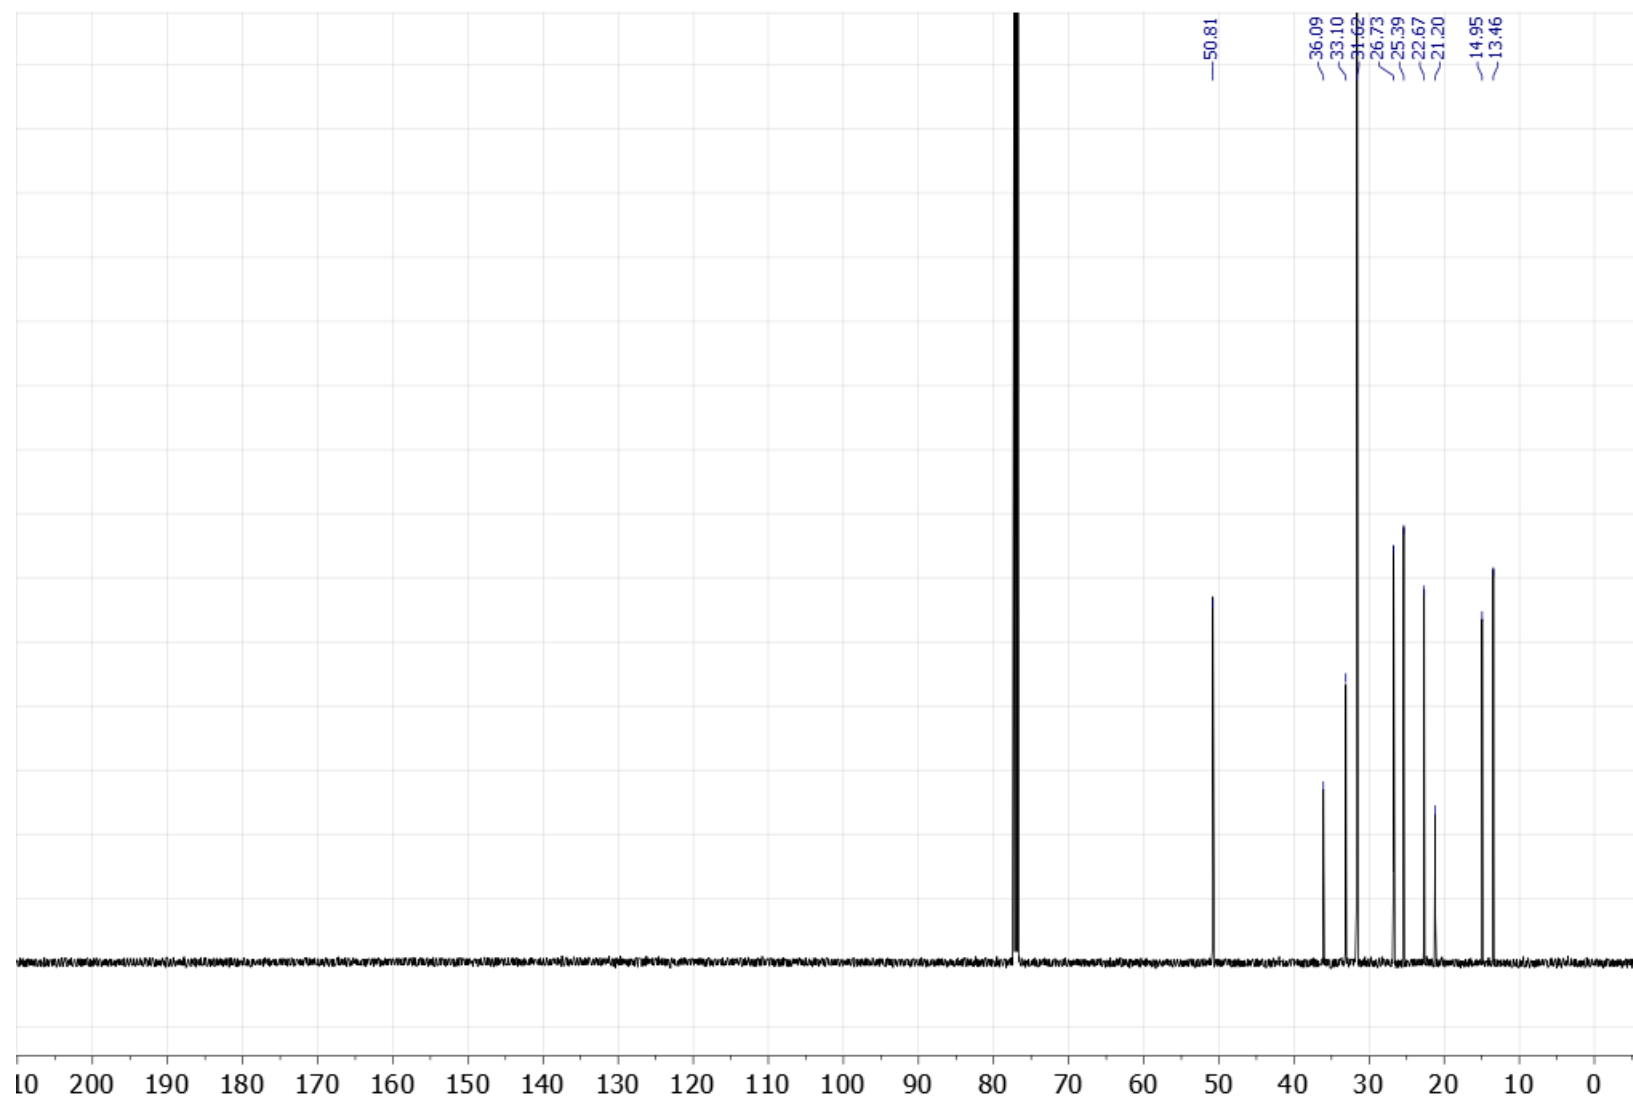



Compound **S5**  $^1\text{H}$  NMR (500 MHz,  $\text{CDCl}_3$ )

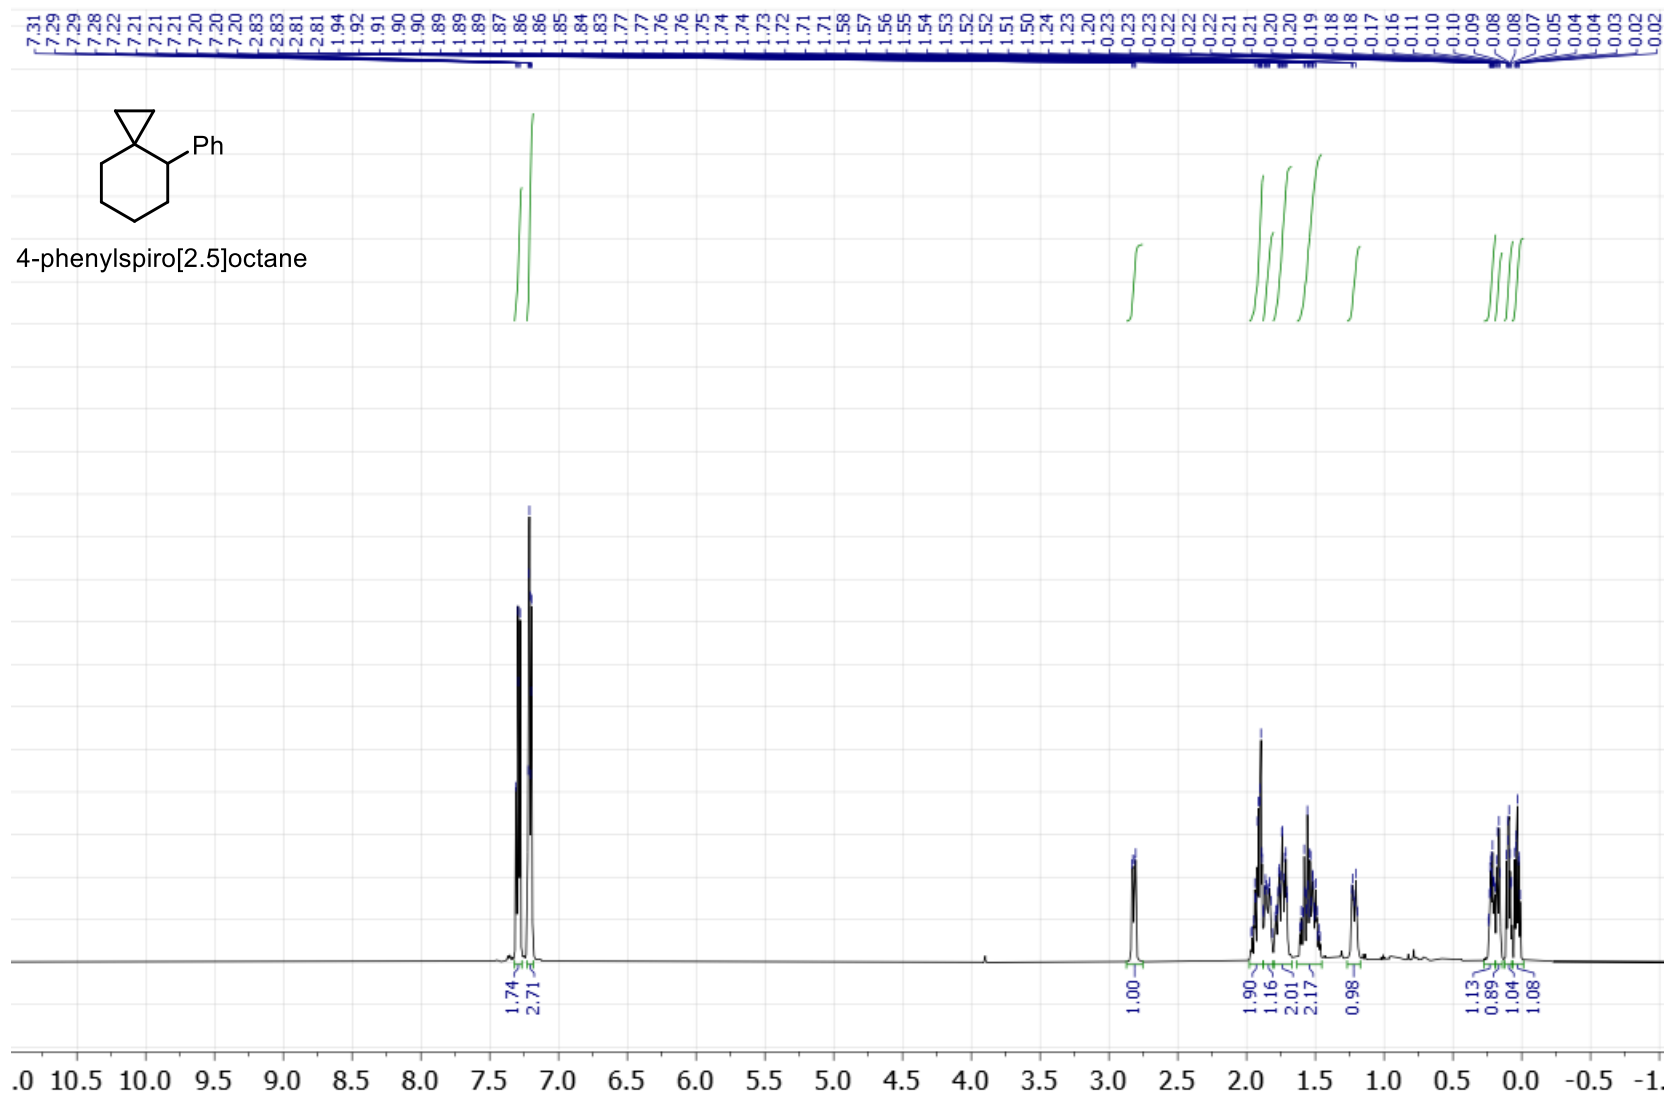

Compound **S5**  $^{13}\text{C}$  NMR (126 MHz,  $\text{CDCl}_3$ )

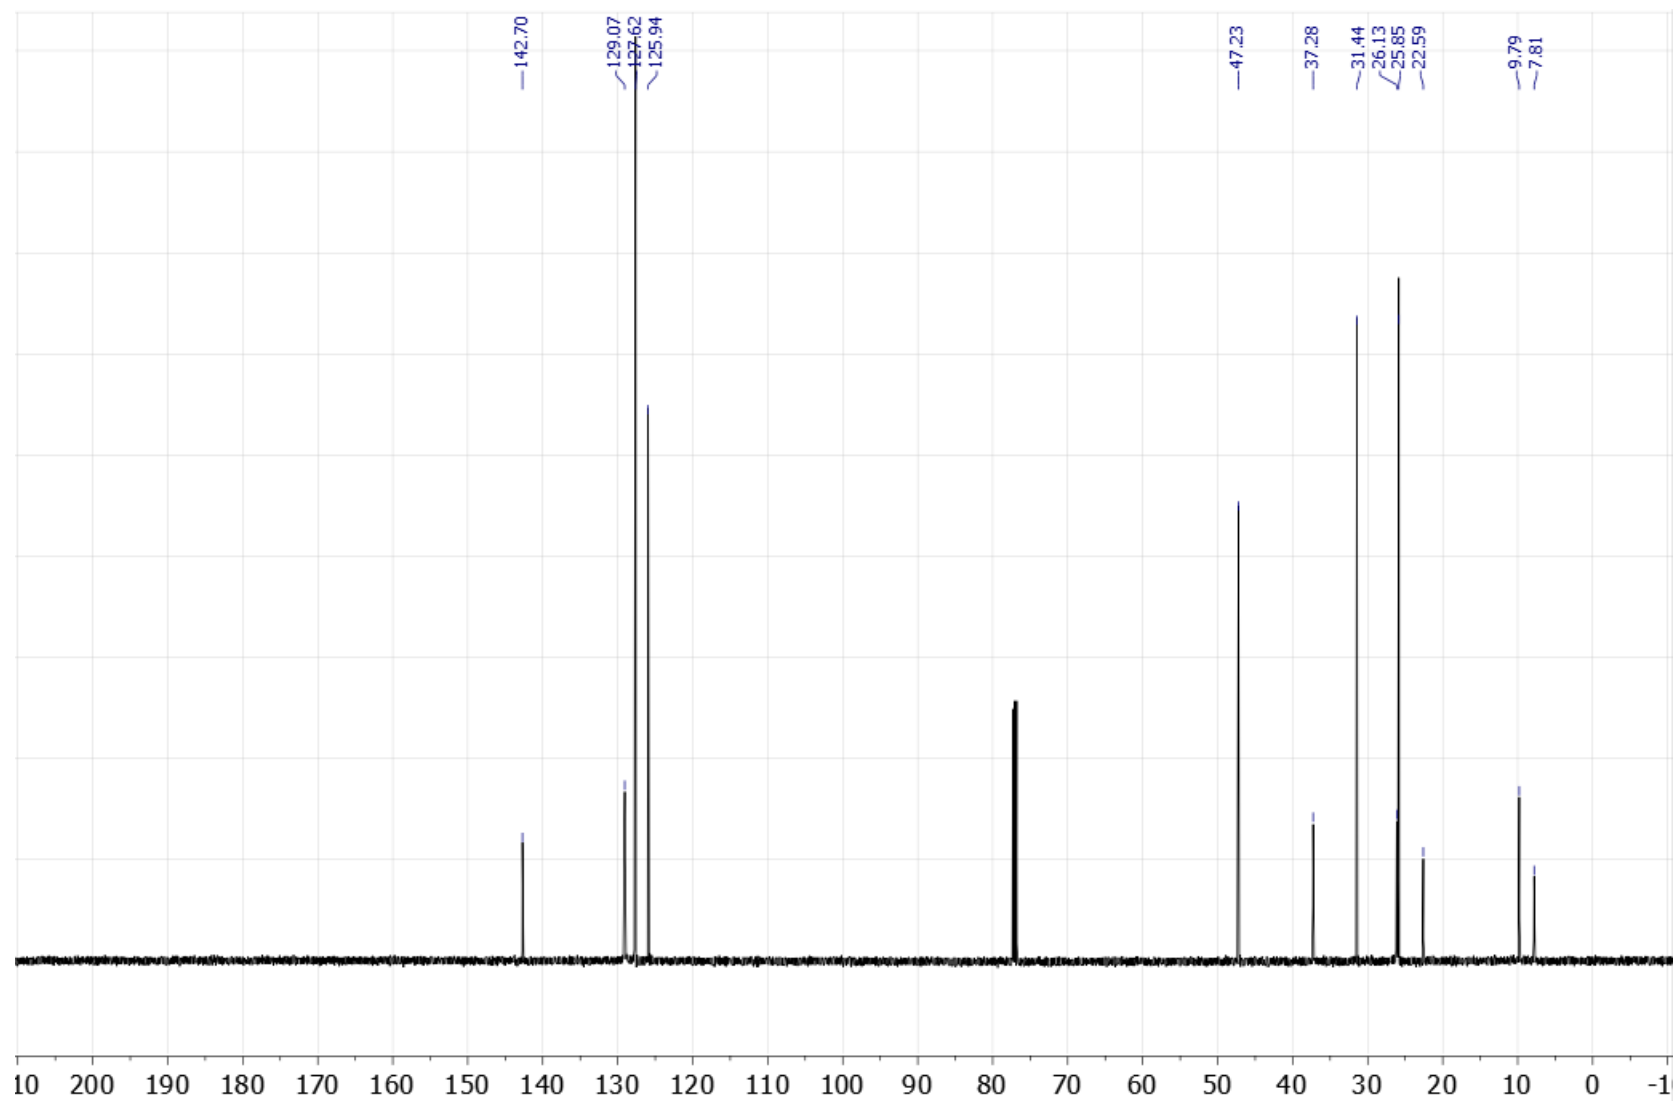

Compound **S6**  $^1\text{H}$  NMR (500 MHz,  $\text{CDCl}_3$ )

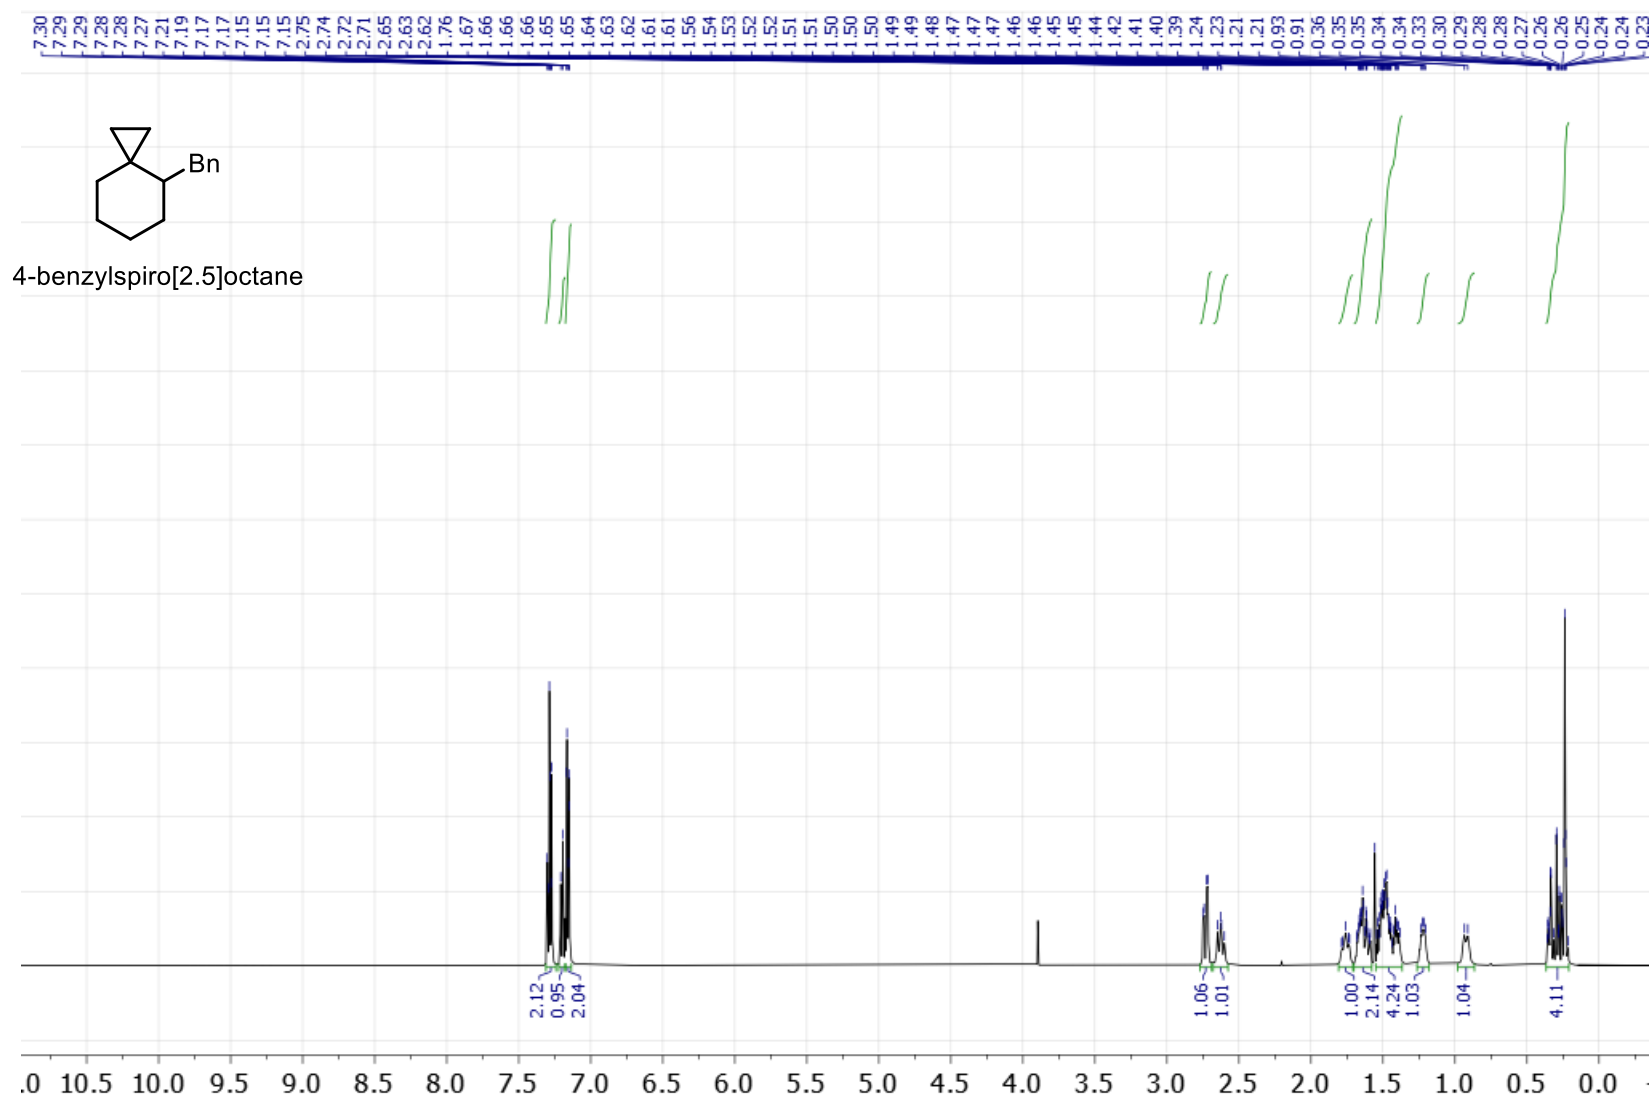

Compound **S6**  $^{13}\text{C}$  NMR (126 MHz,  $\text{CDCl}_3$ )

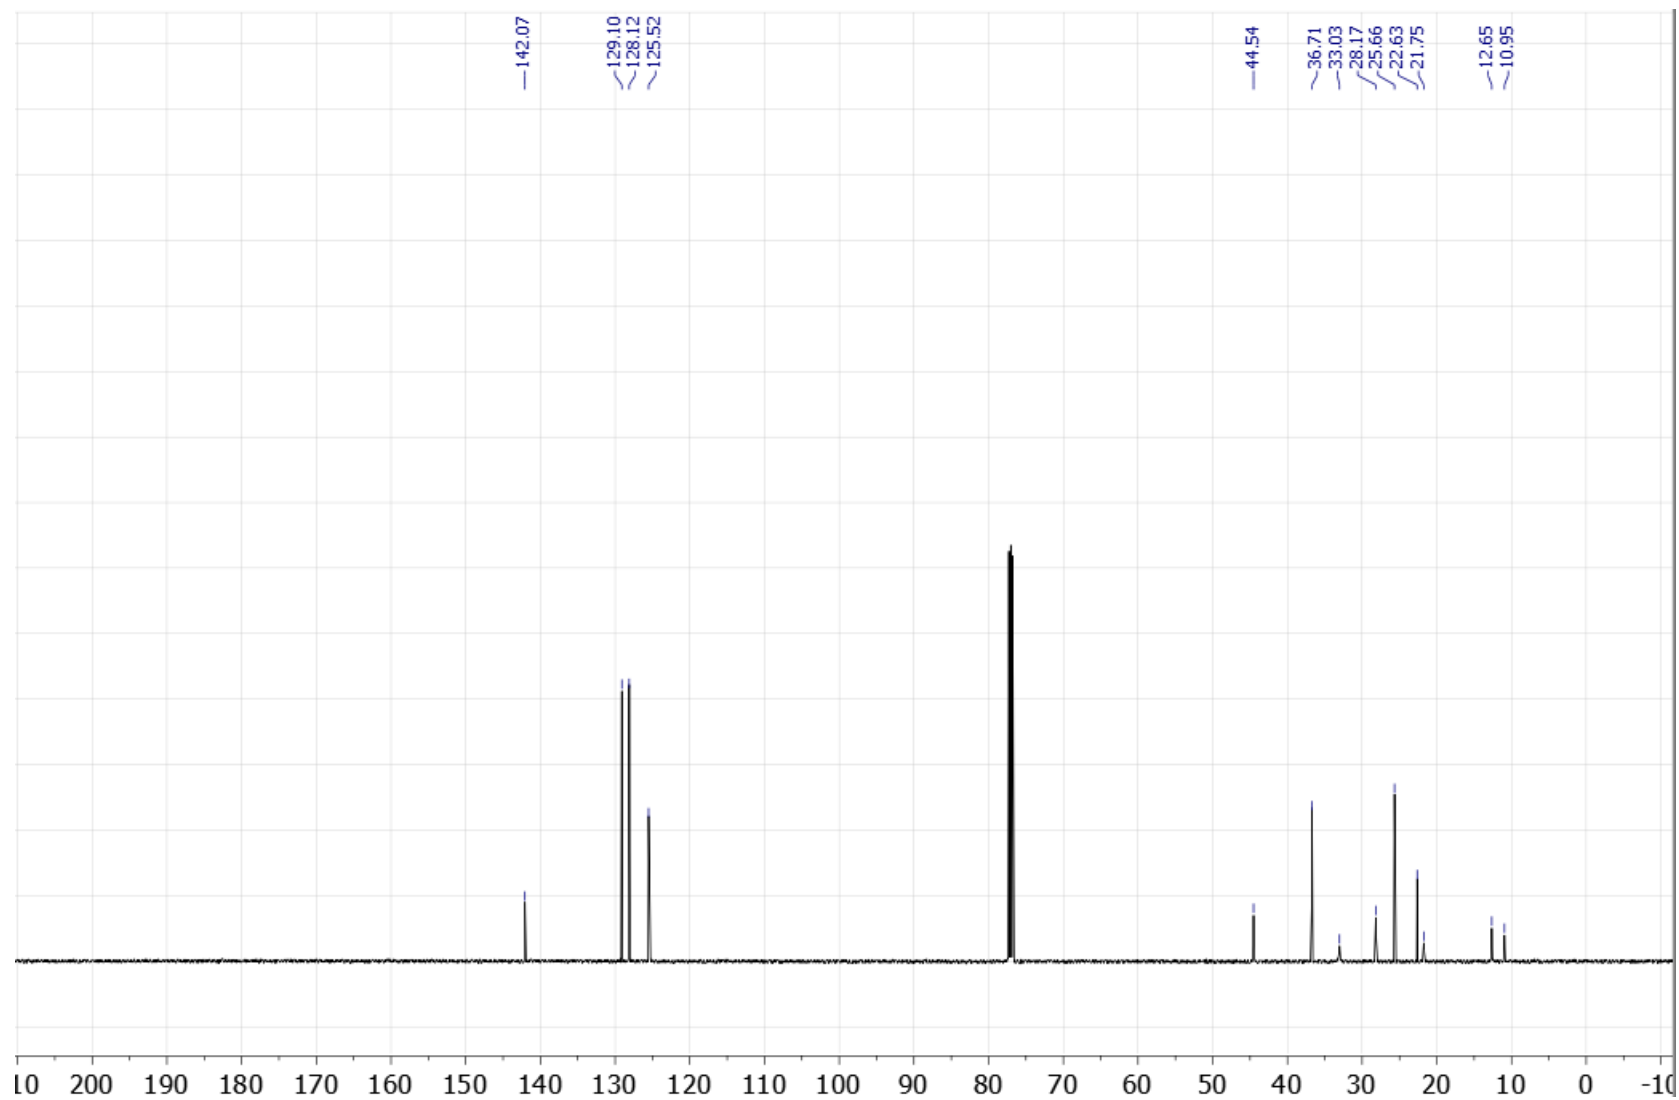

Compound **S7a**  $^1\text{H}$  NMR (500 MHz,  $\text{CDCl}_3$ )

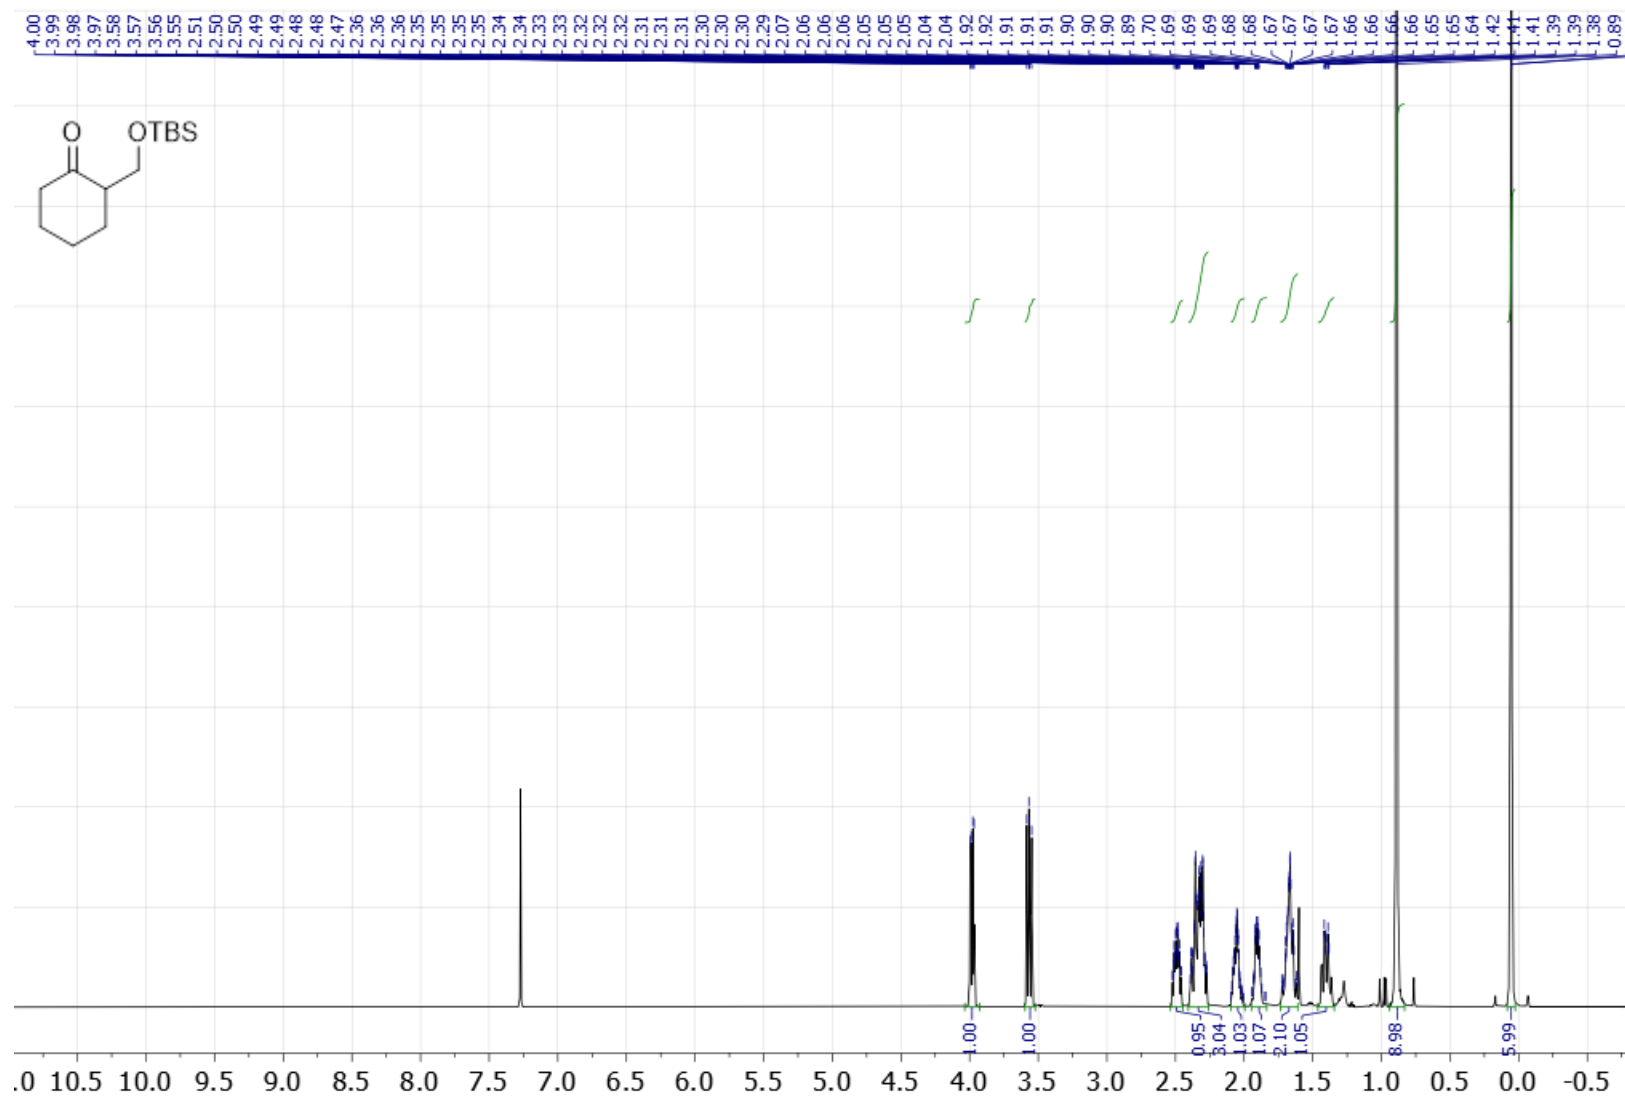

Compound **S7a**  $^{13}\text{C}$  NMR (126 MHz,  $\text{CDCl}_3$ )

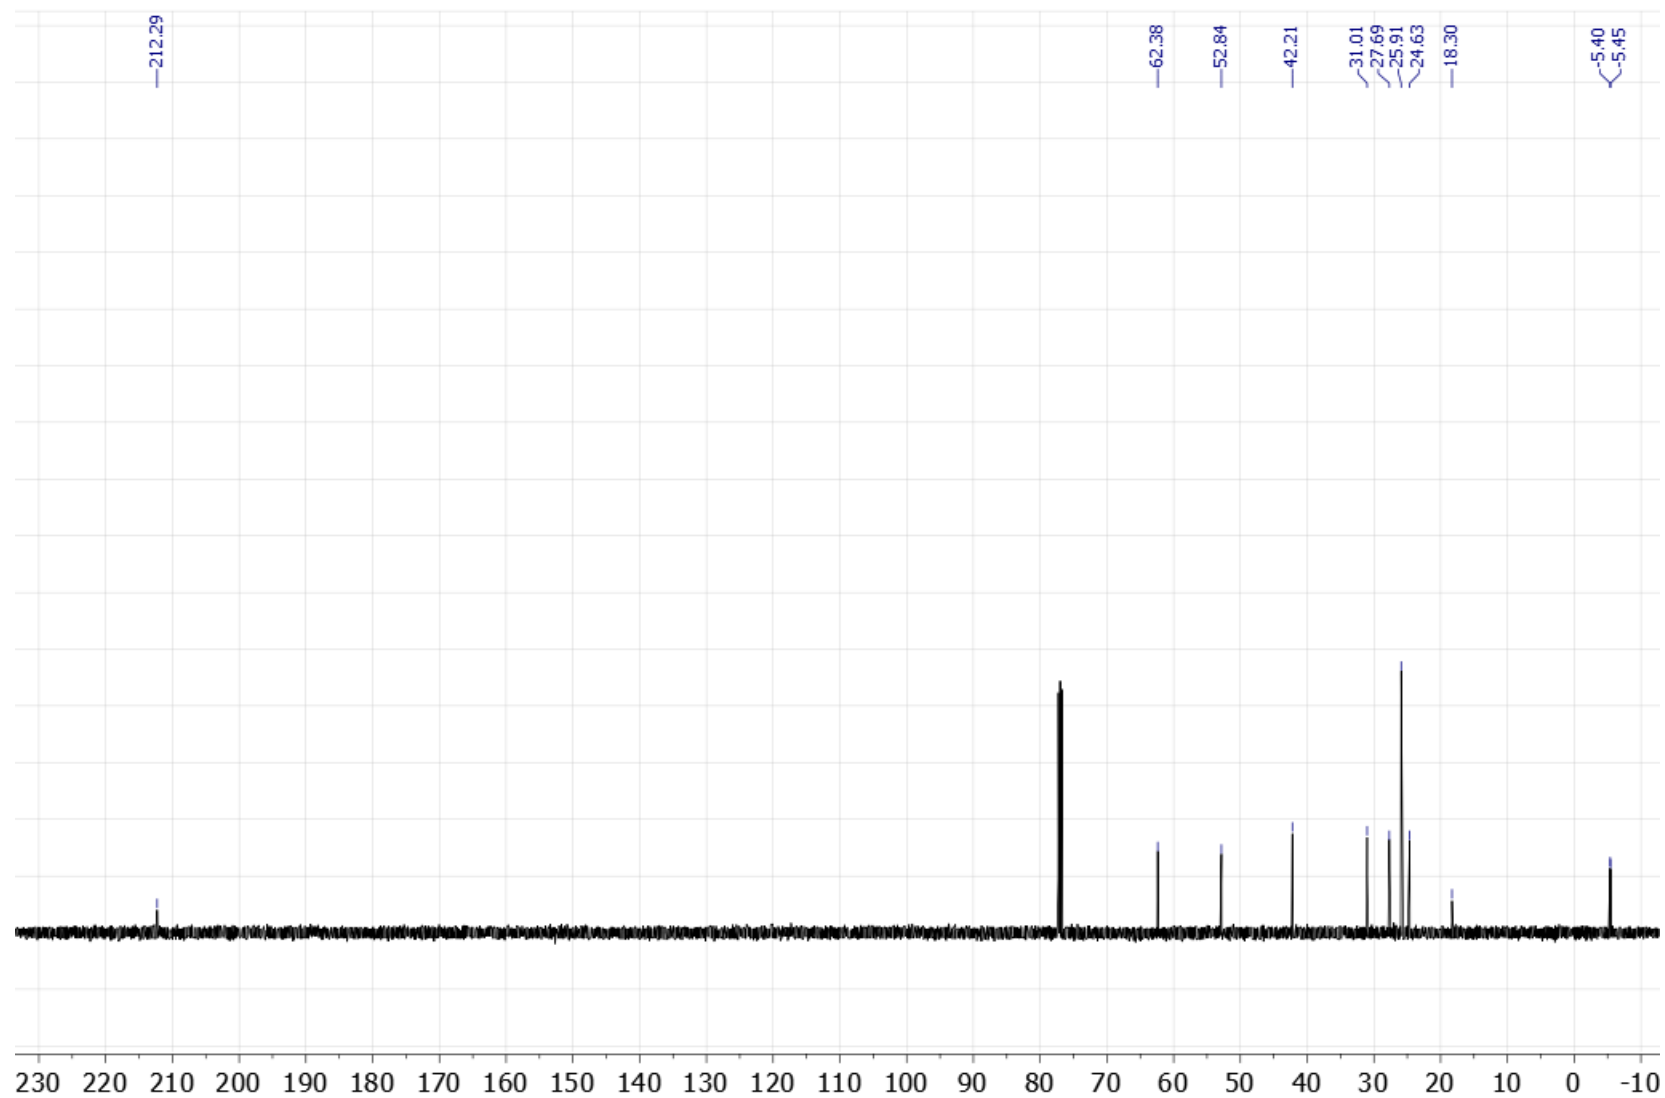

Compound **S7b**  $^1\text{H}$  NMR (500 MHz,  $\text{CDCl}_3$ )

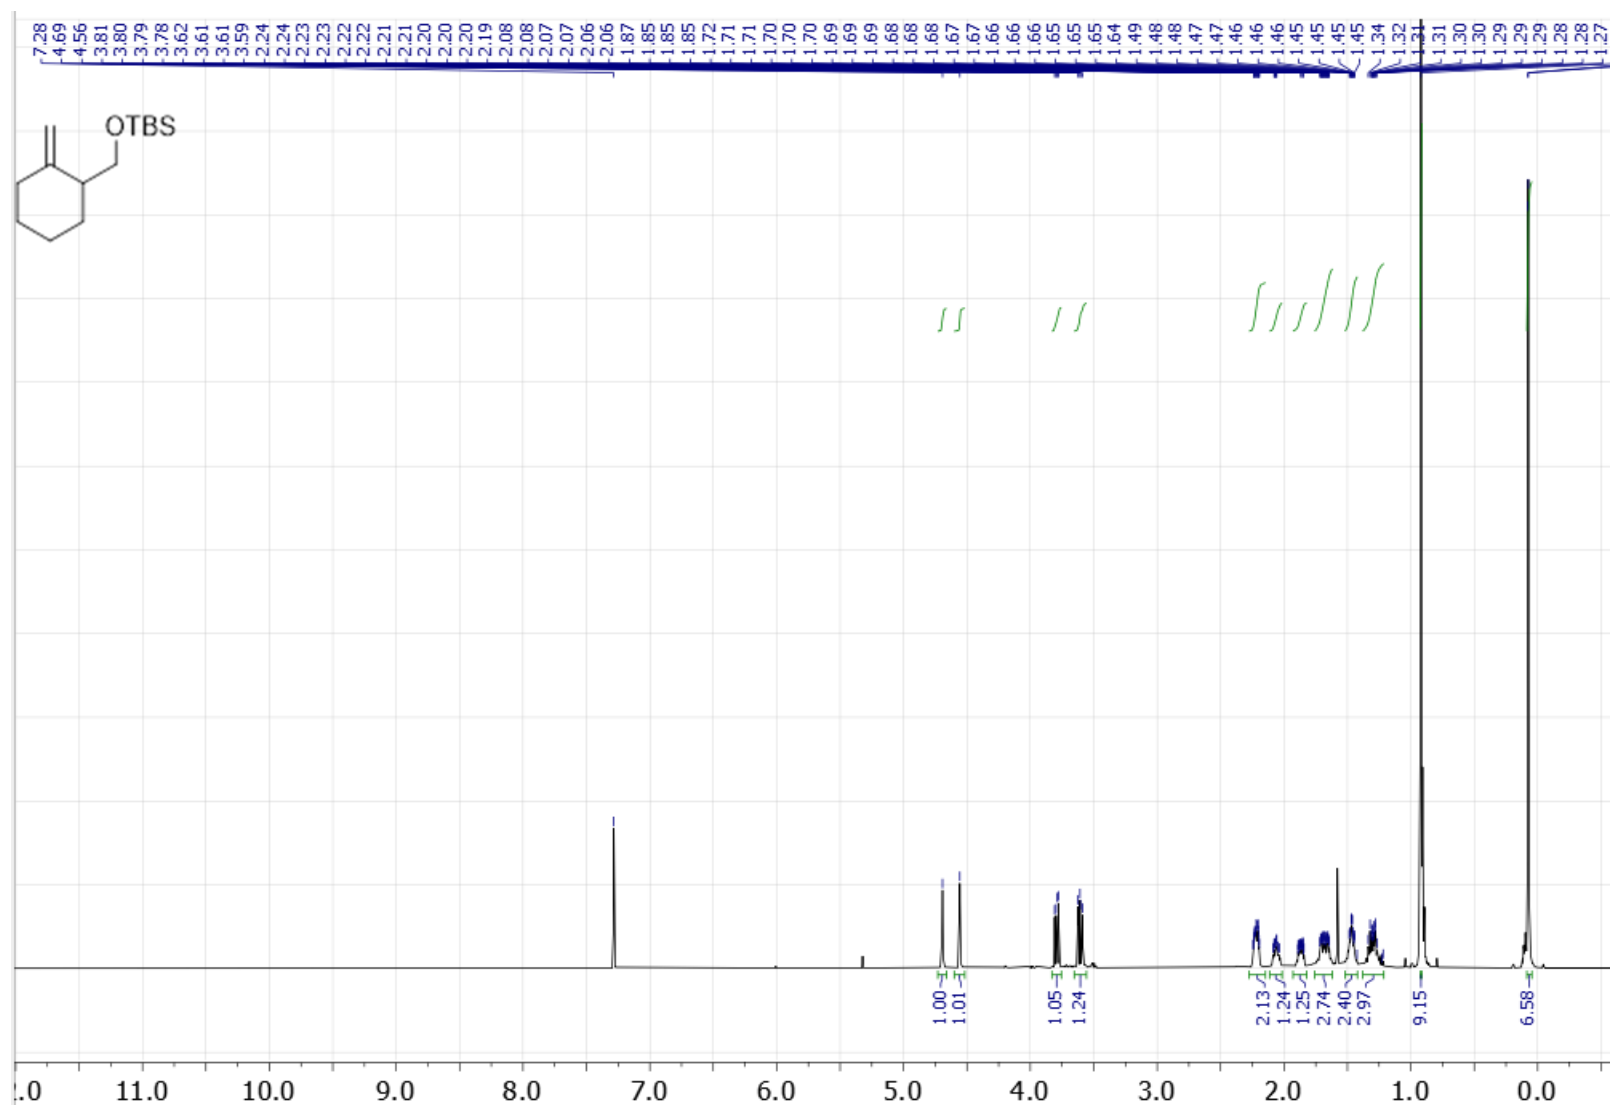

Compound **S7b**  $^{13}\text{C}$  NMR (126 MHz,  $\text{CDCl}_3$ )

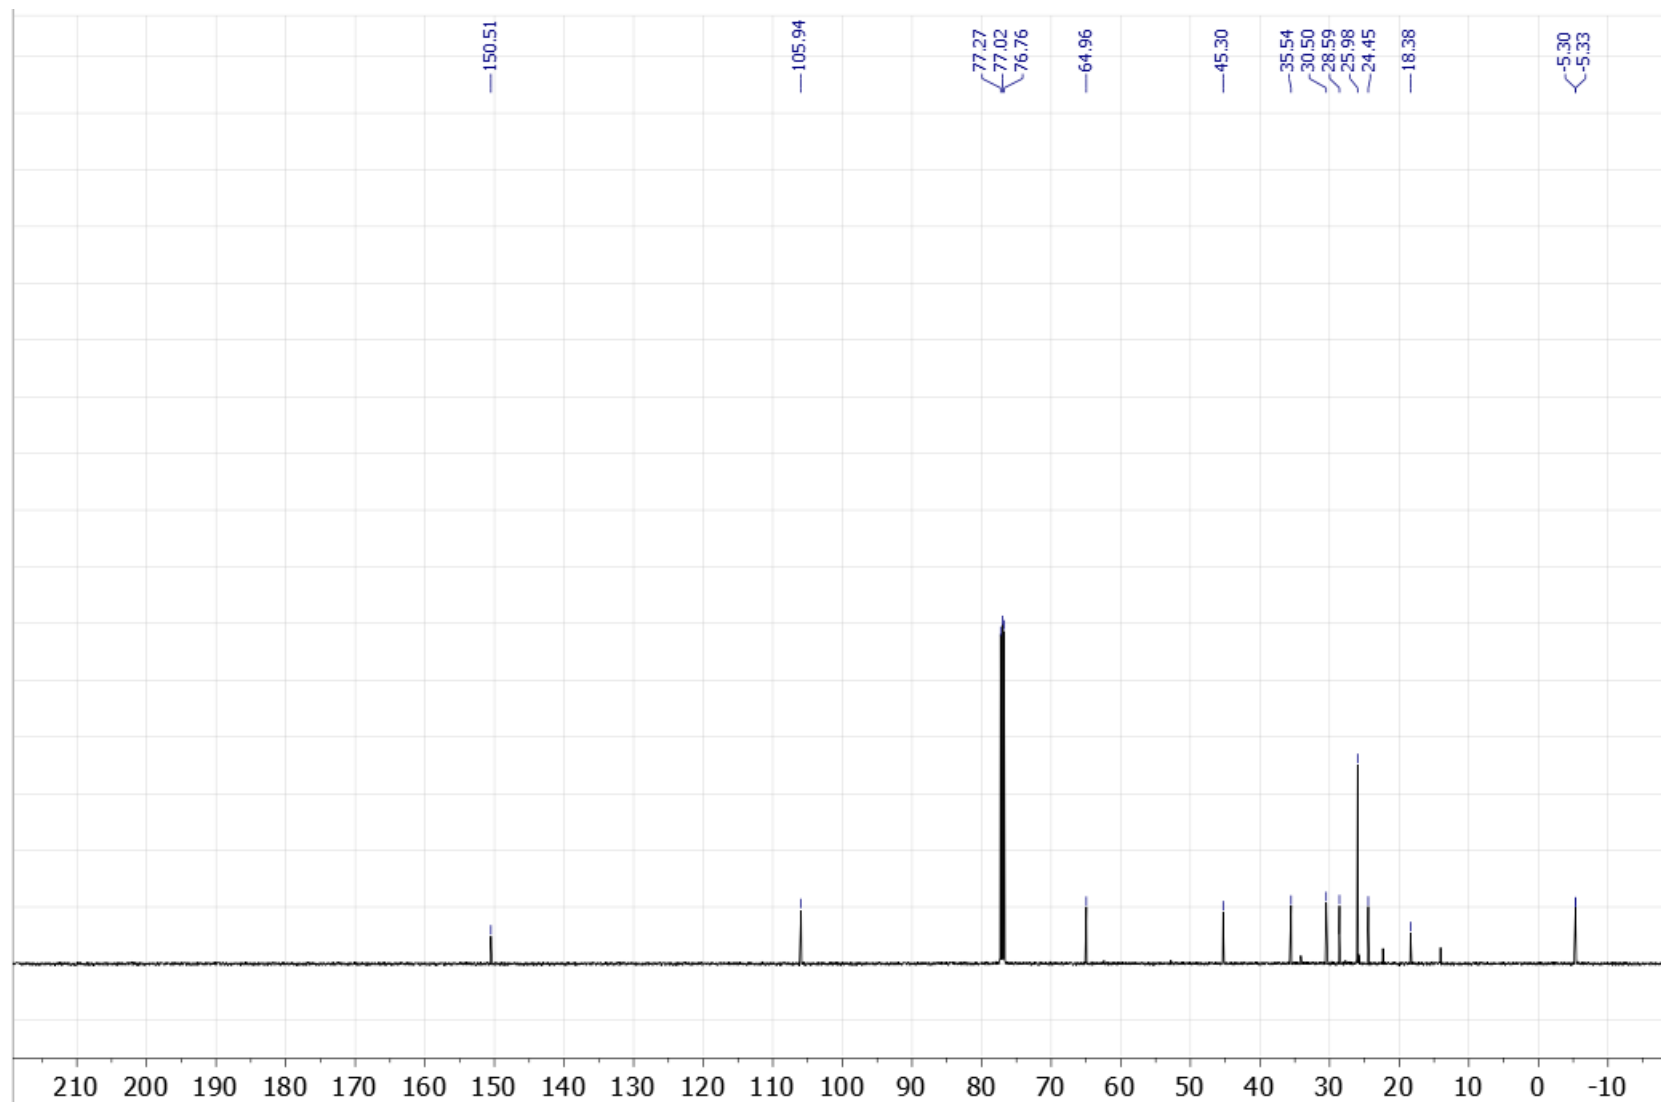



Compound 7c  $^1\text{H}$  NMR (500 MHz,  $\text{CDCl}_3$ )

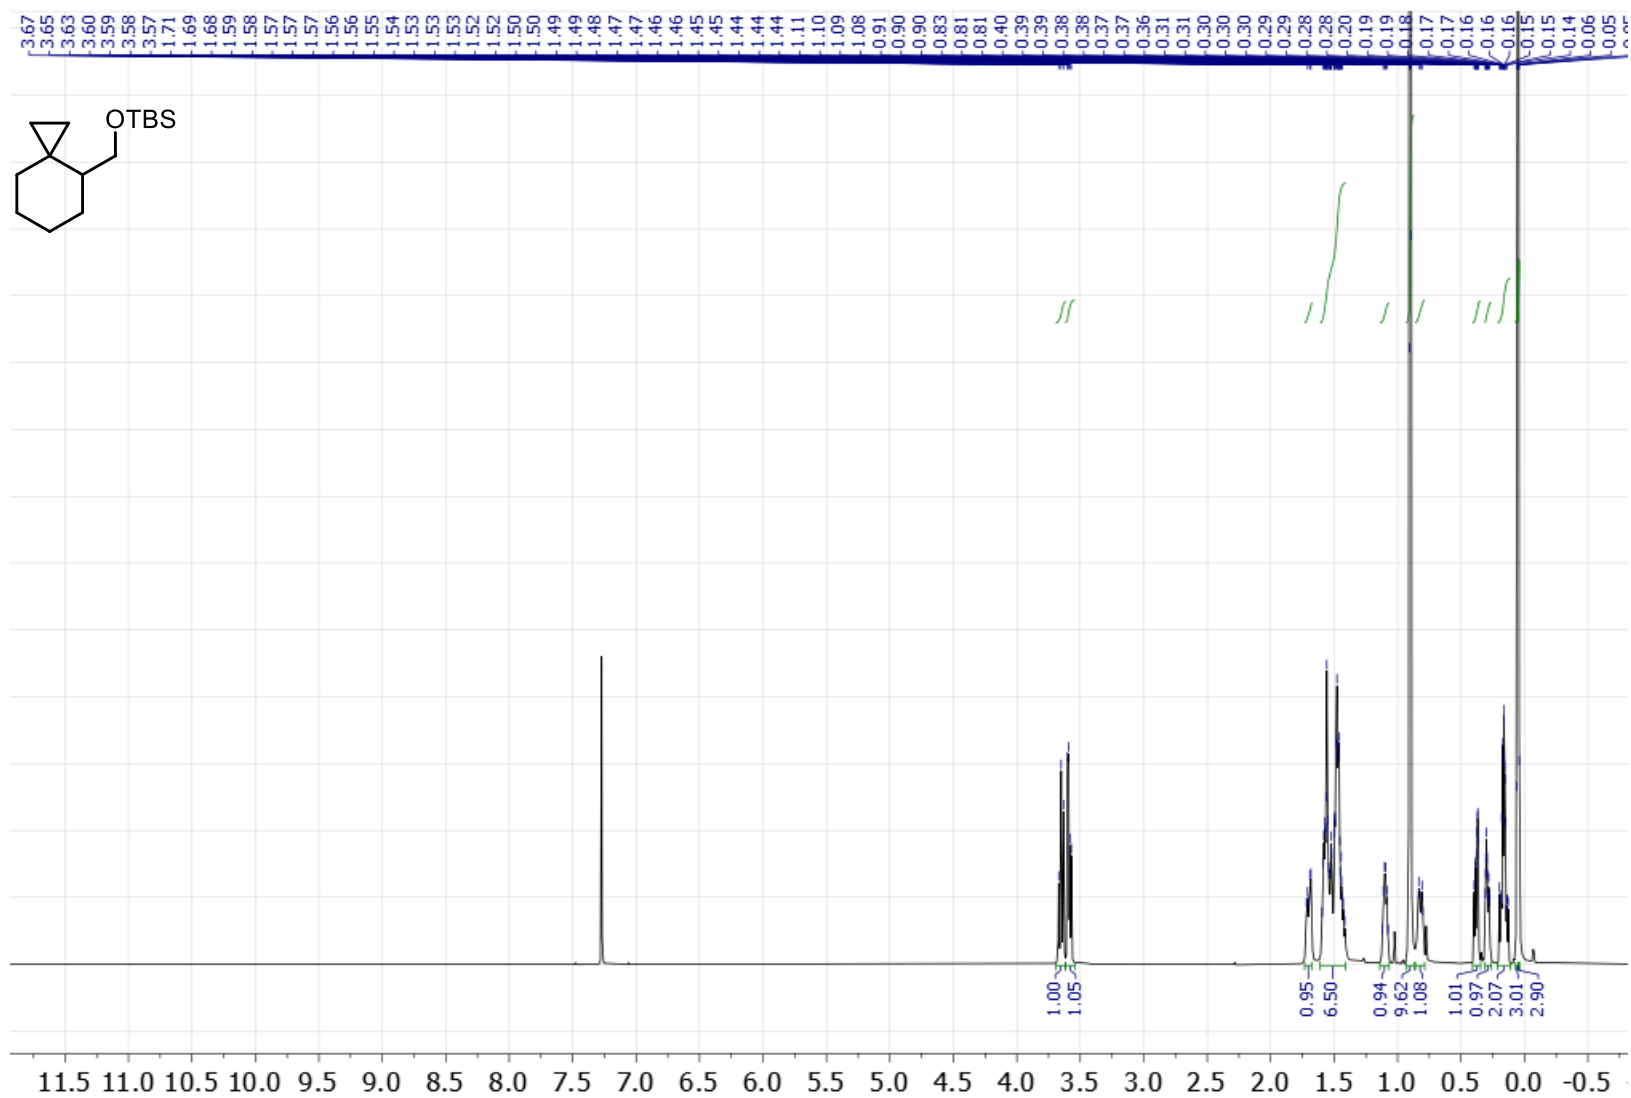

Compound 7c  $^{13}\text{C}$  NMR (126 MHz,  $\text{CDCl}_3$ )

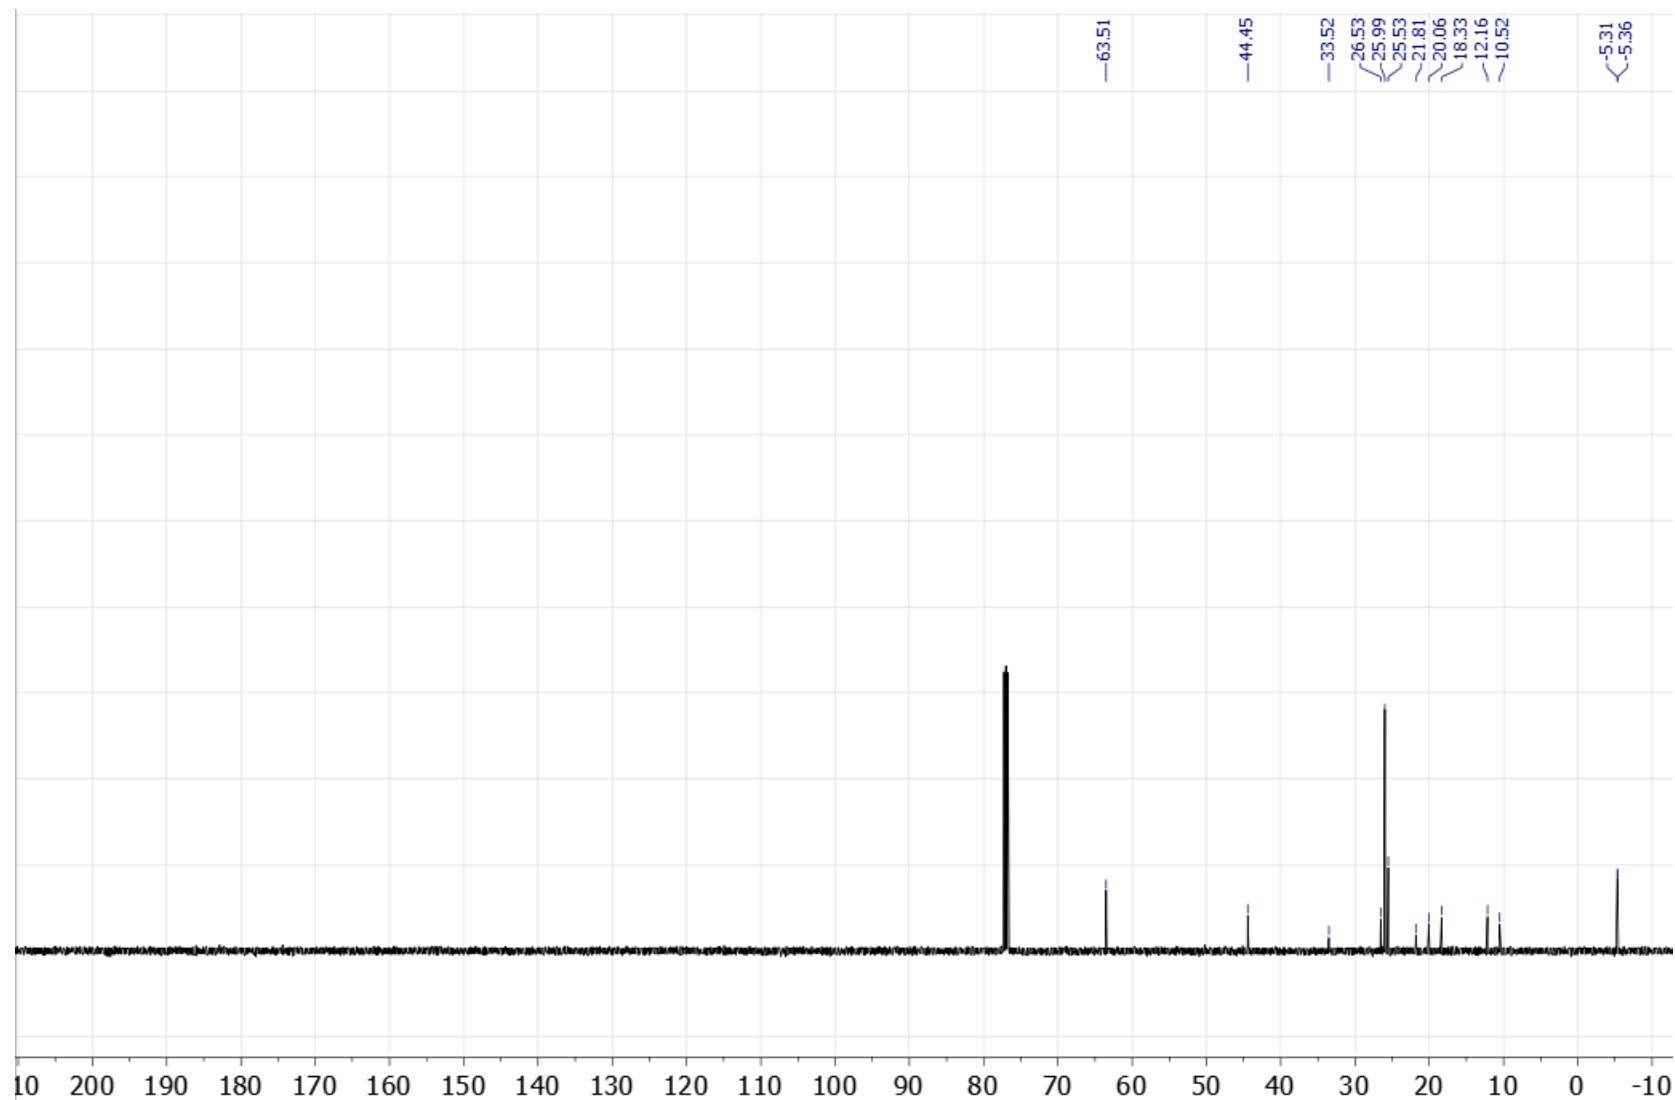

Compound 7  $^1\text{H}$  NMR (500 MHz,  $\text{CDCl}_3$ )

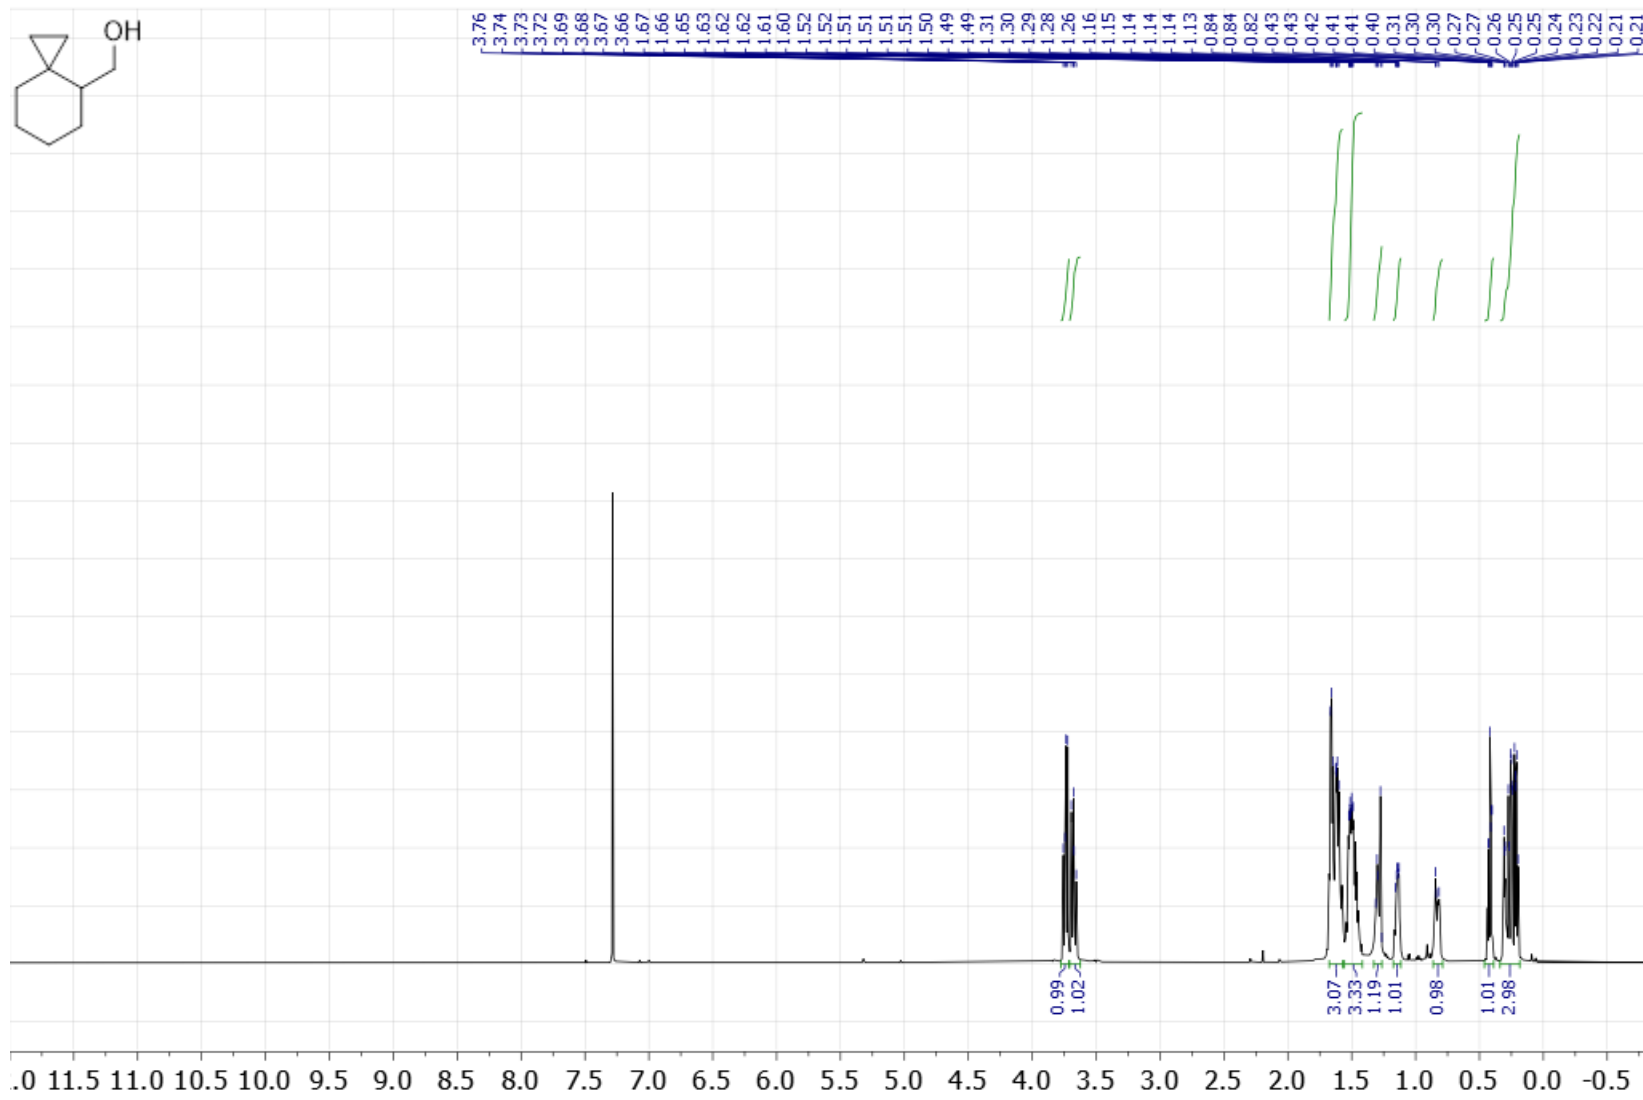

Compound 7  $^{13}\text{C}$  NMR (126 MHz,  $\text{CDCl}_3$ )

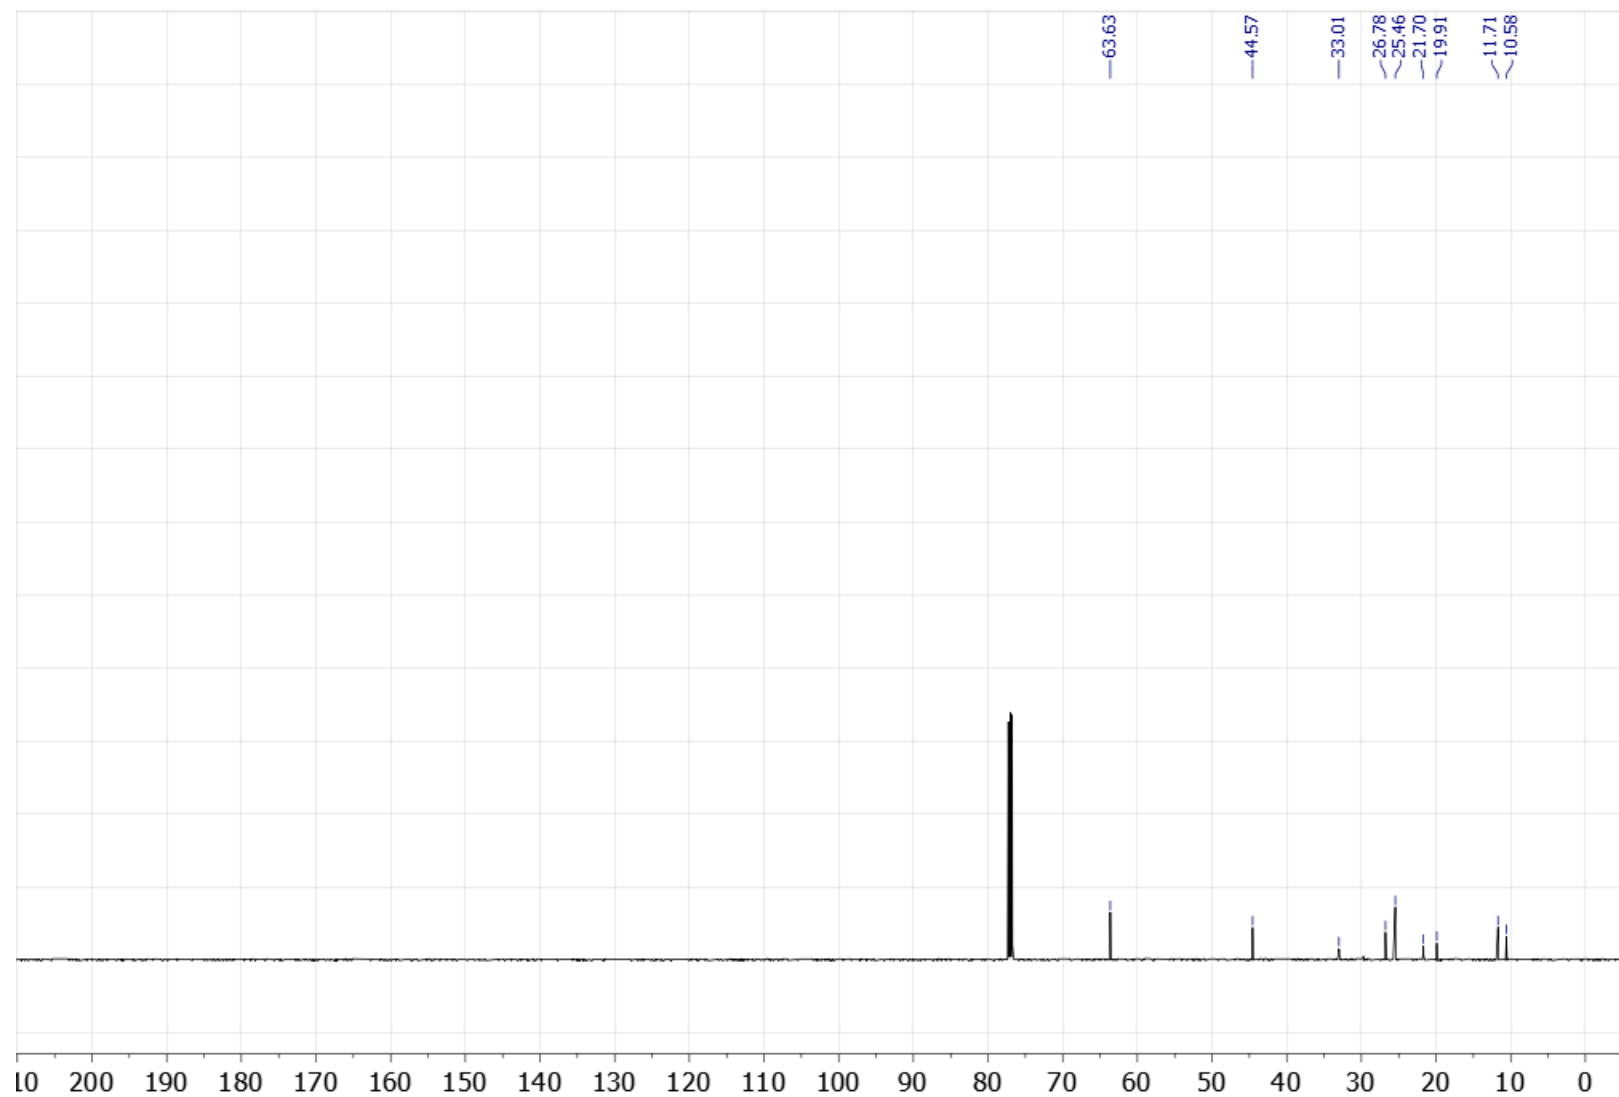

Compound 8  $^1\text{H}$  NMR (500 MHz,  $d_6$ -Acetone)

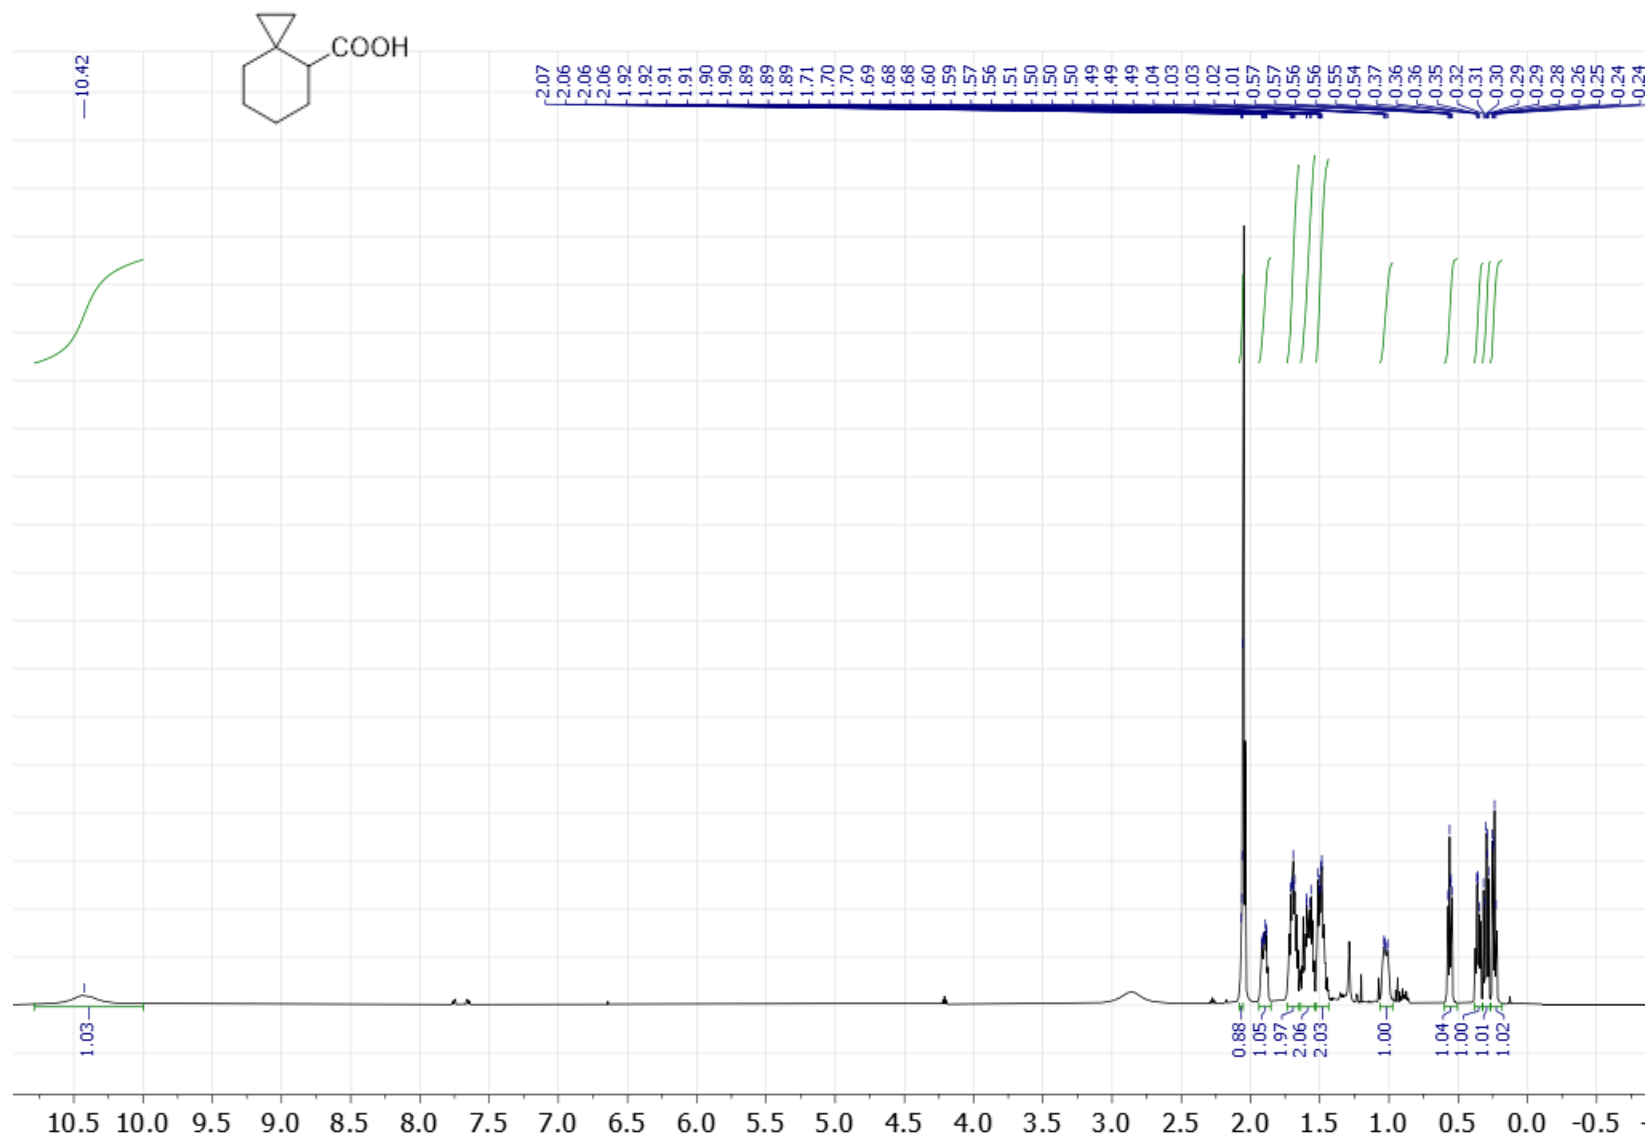

Compound 8  $^{13}\text{C}$  NMR (500 MHz,  $d_6$ -Acetone)

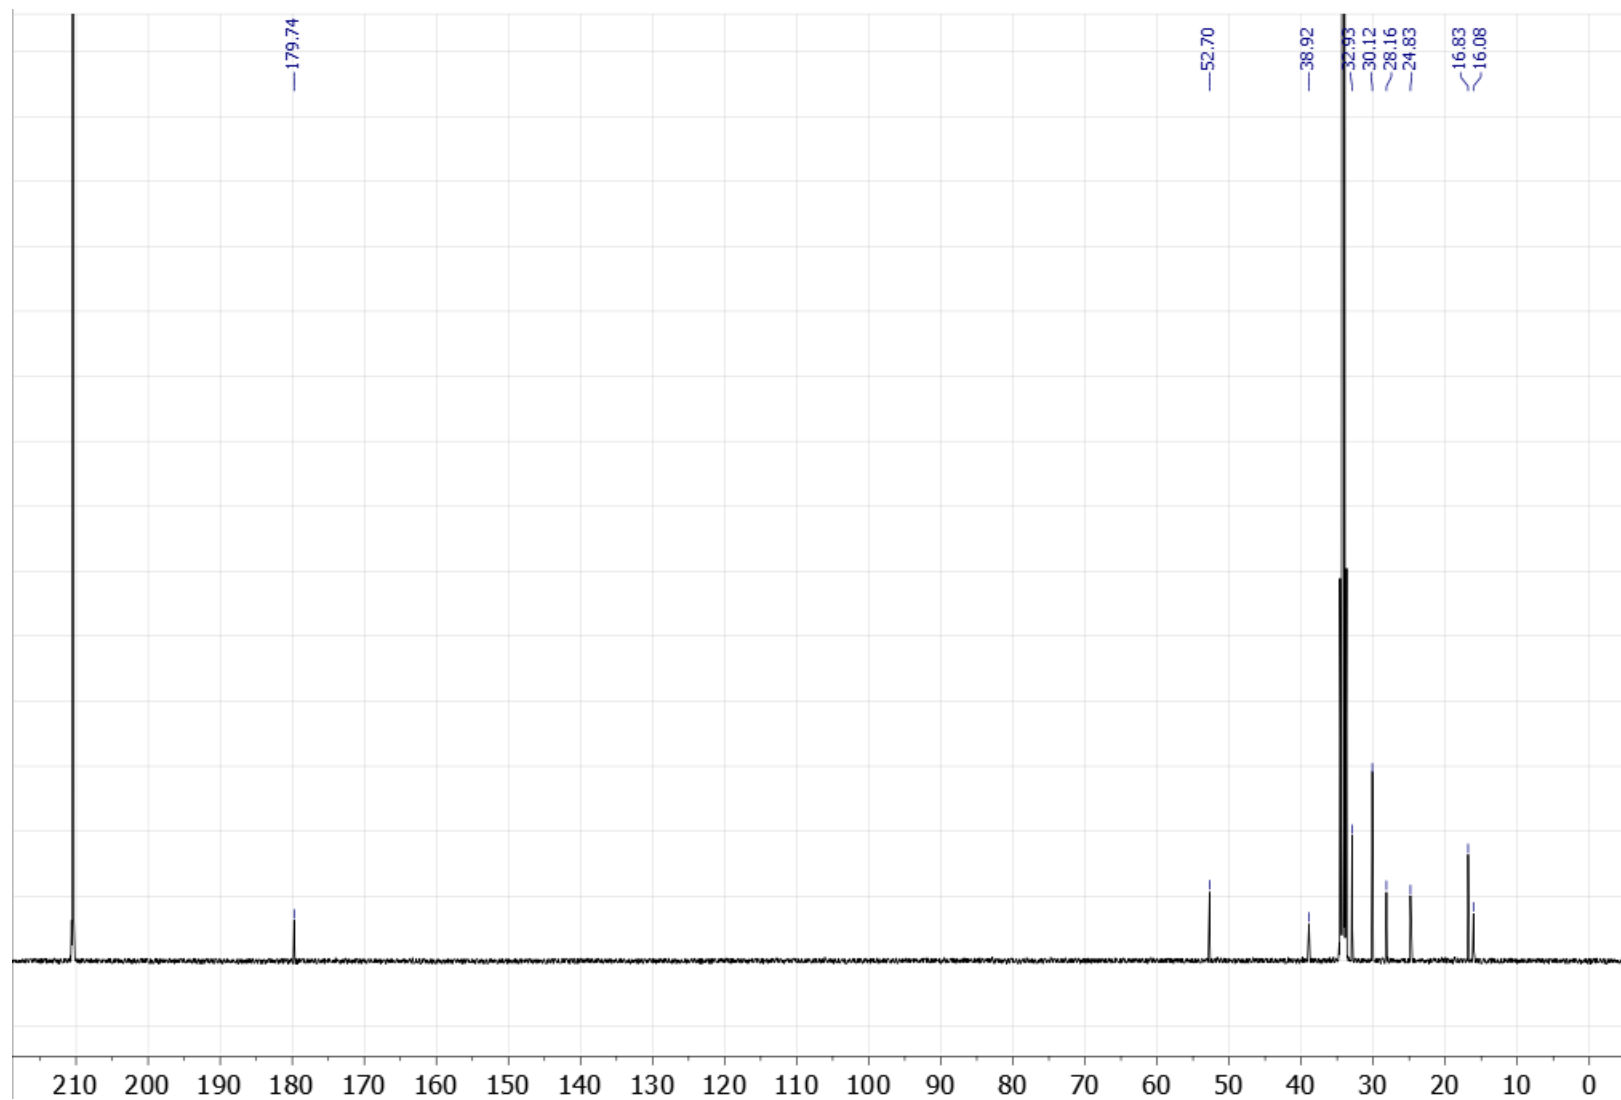

Compound 9  $^1\text{H}$  NMR (126 MHz,  $d_6$ -Acetone)

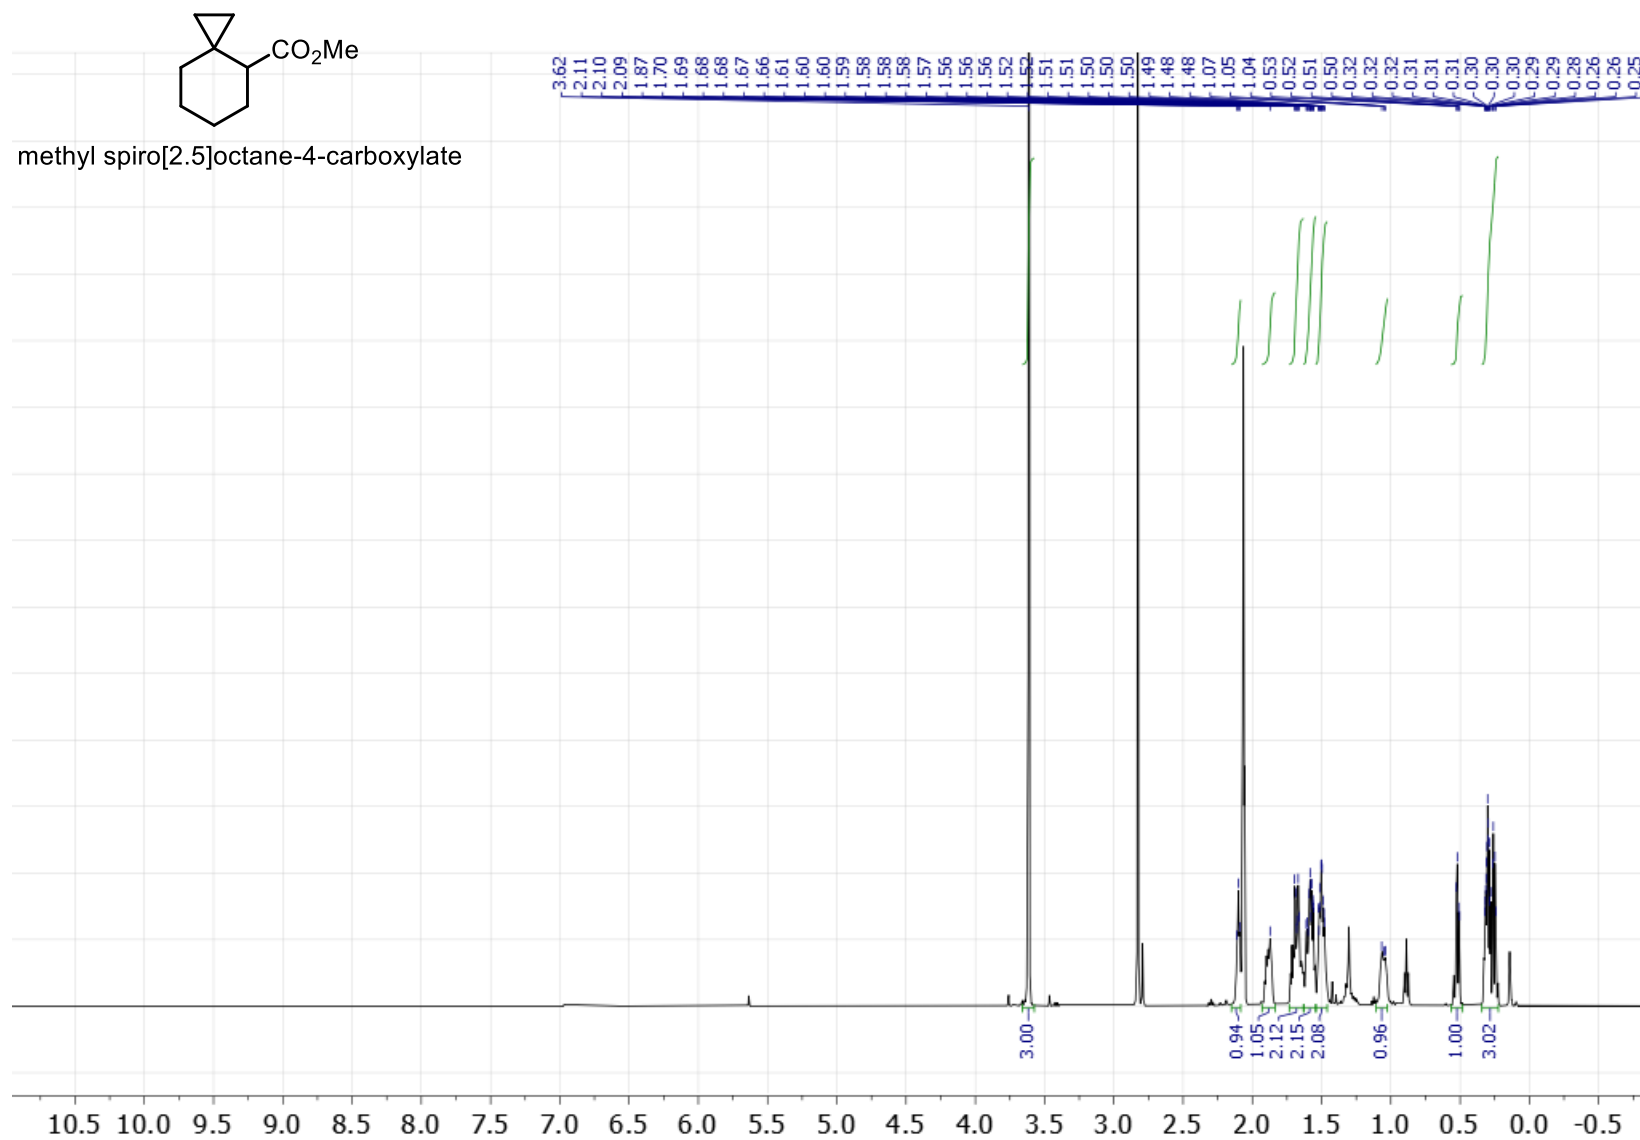

Compound **S9**  $^{13}\text{C}$  NMR (500 MHz,  $d_6$ -Acetone/  $d_3$ -acetonitrile))

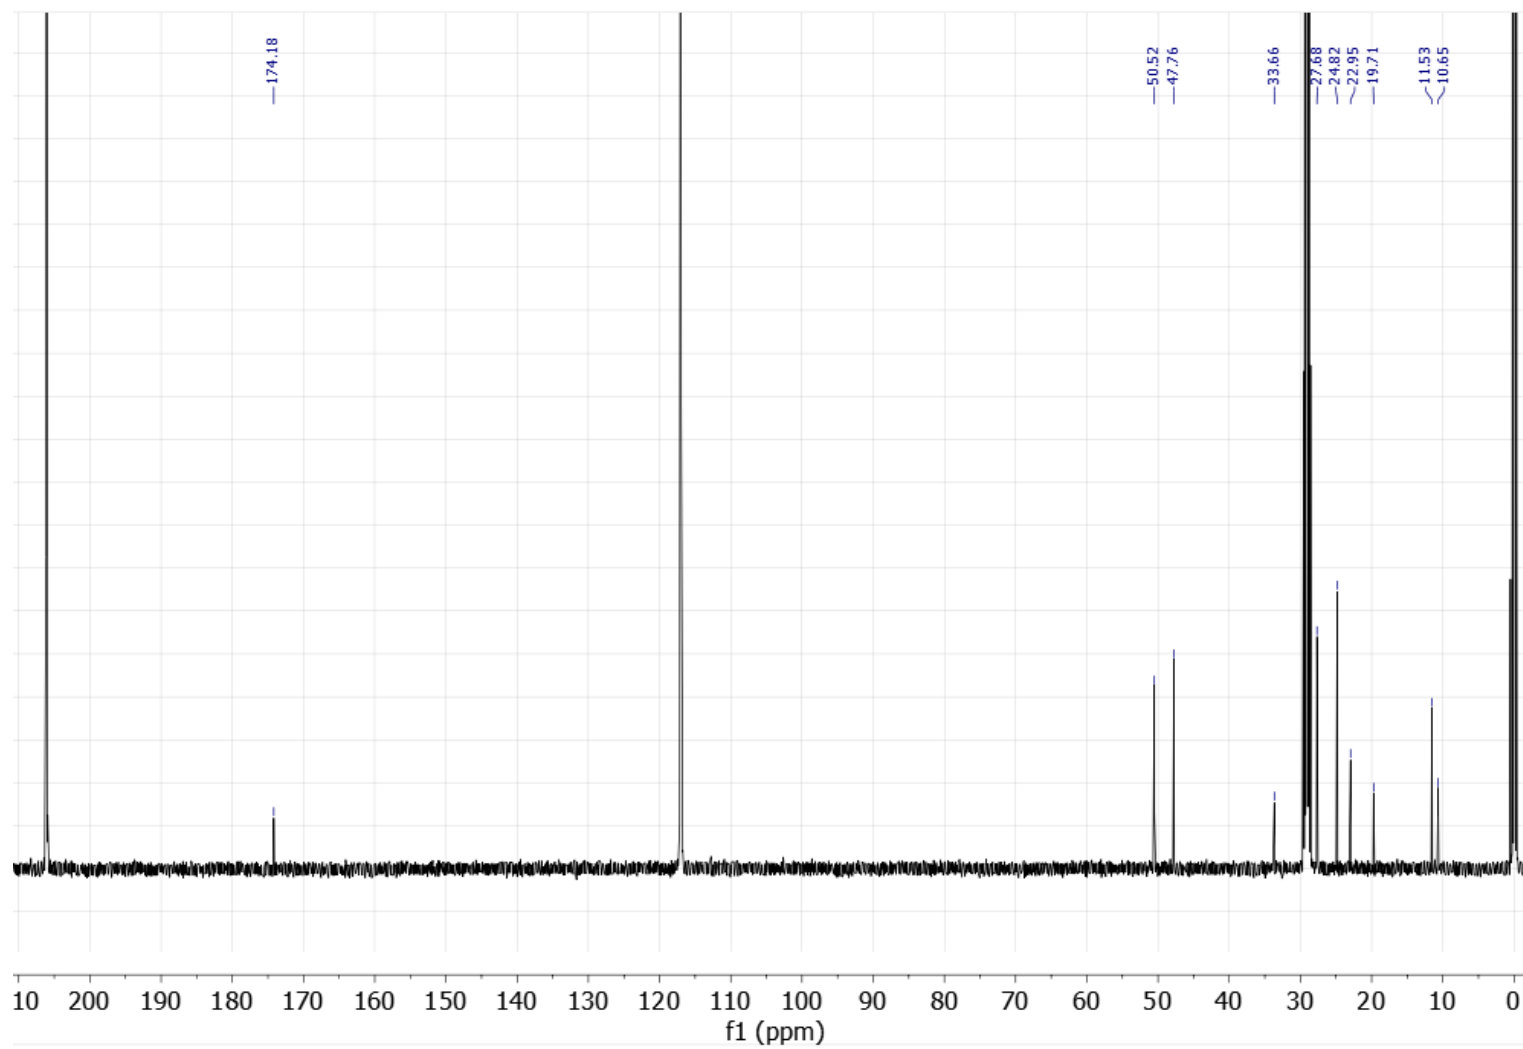



Compound **S10**  $^1\text{H}$  NMR (500 MHz,  $d_6$ -Acetone [previously reported in chloroform])

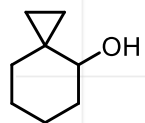

spiro[2.5]octan-4-ol

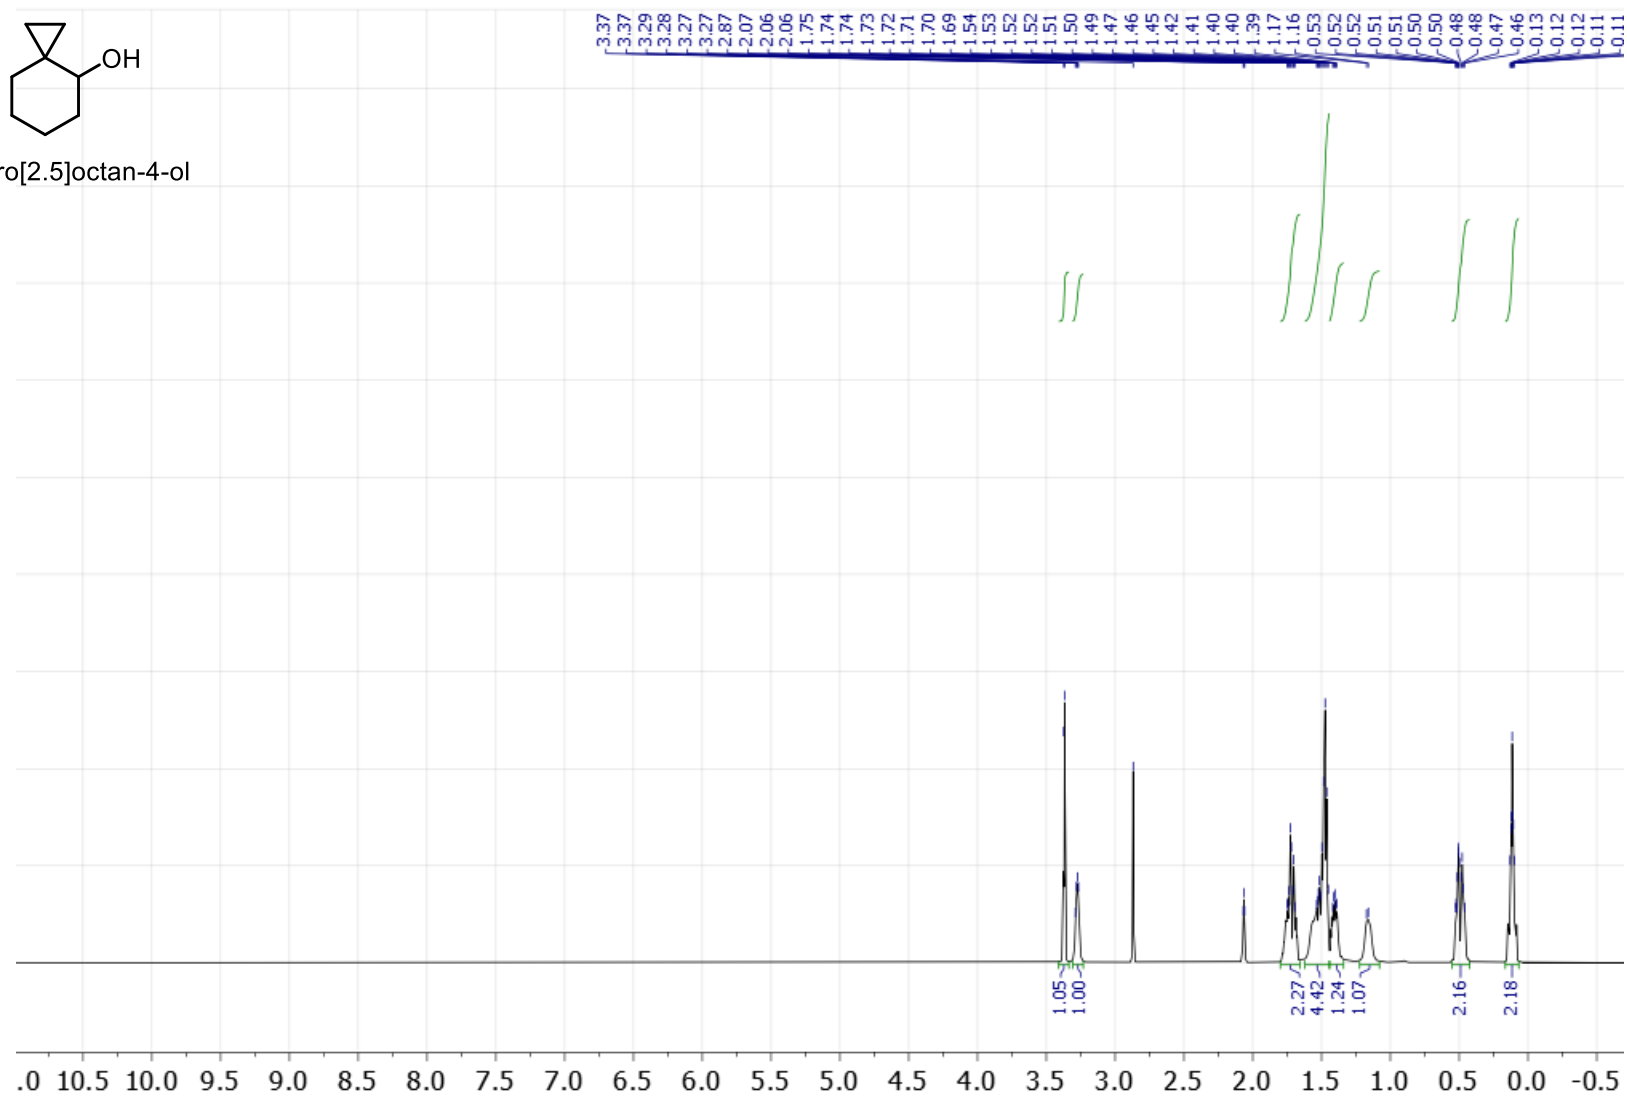

Compound **S11**  $^1\text{H}$  NMR (500 MHz,  $d_6$ -acetone)

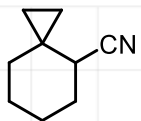

spiro[2.5]octane-4-carbonitrile

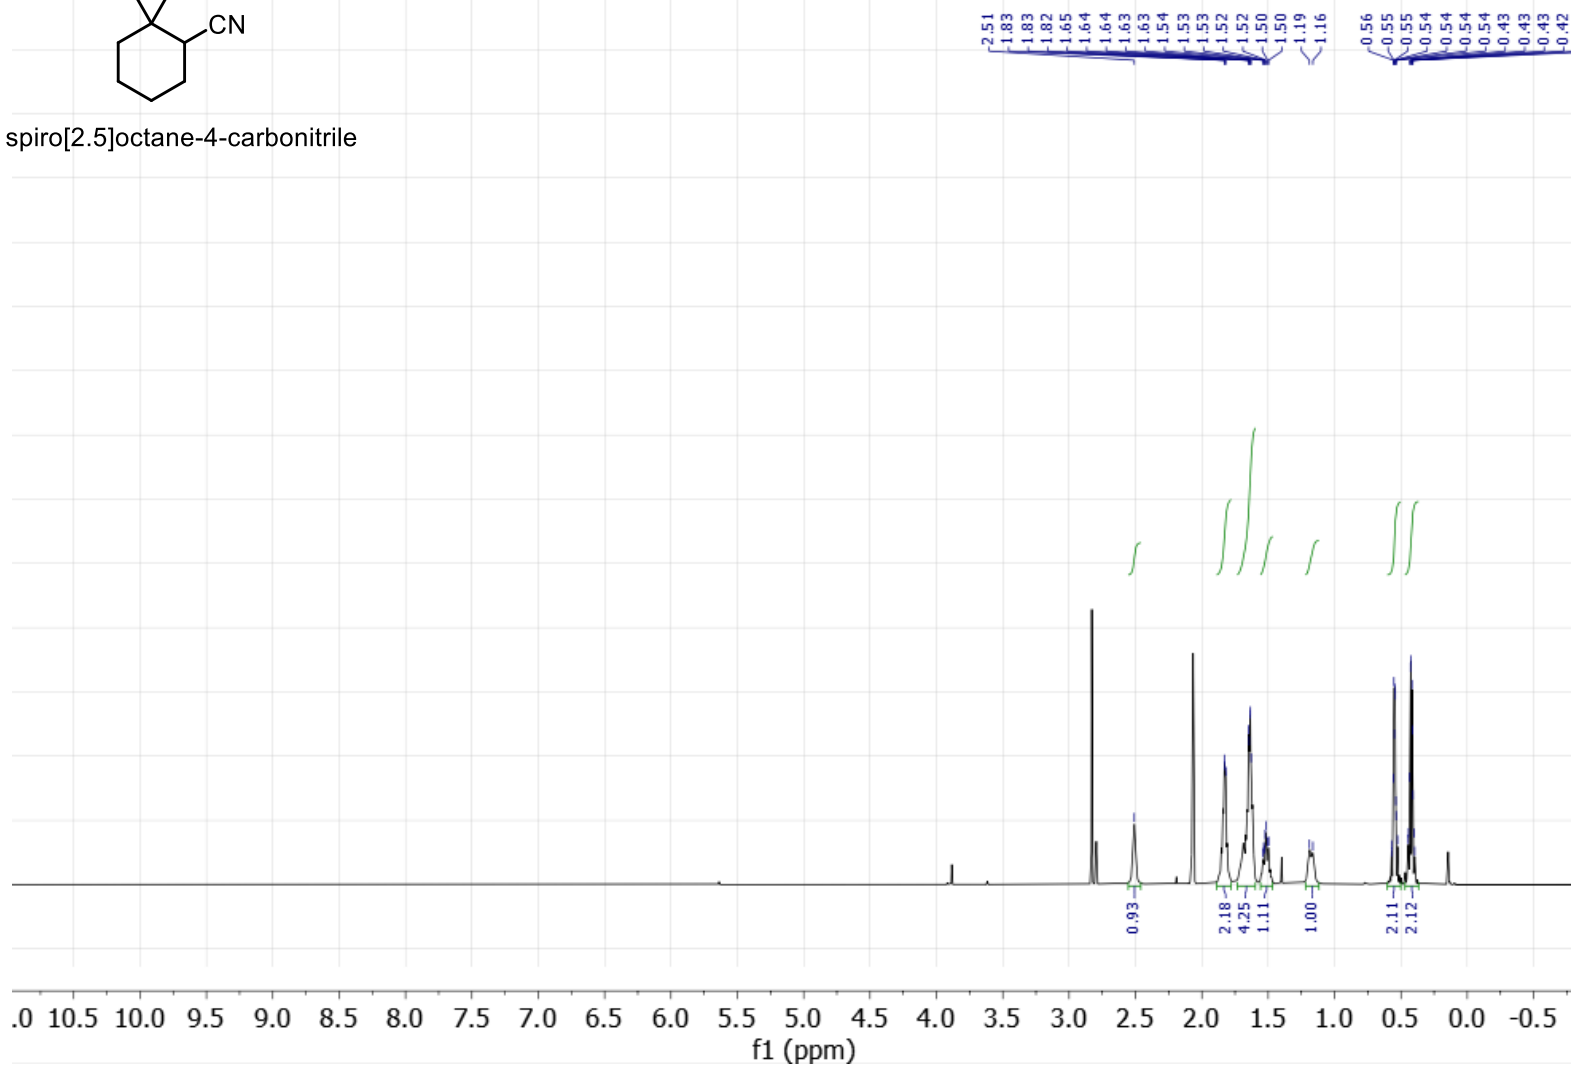

Compound **S11**  $^{13}\text{C}$  NMR (126 MHz,  $d_6$ -acetone)

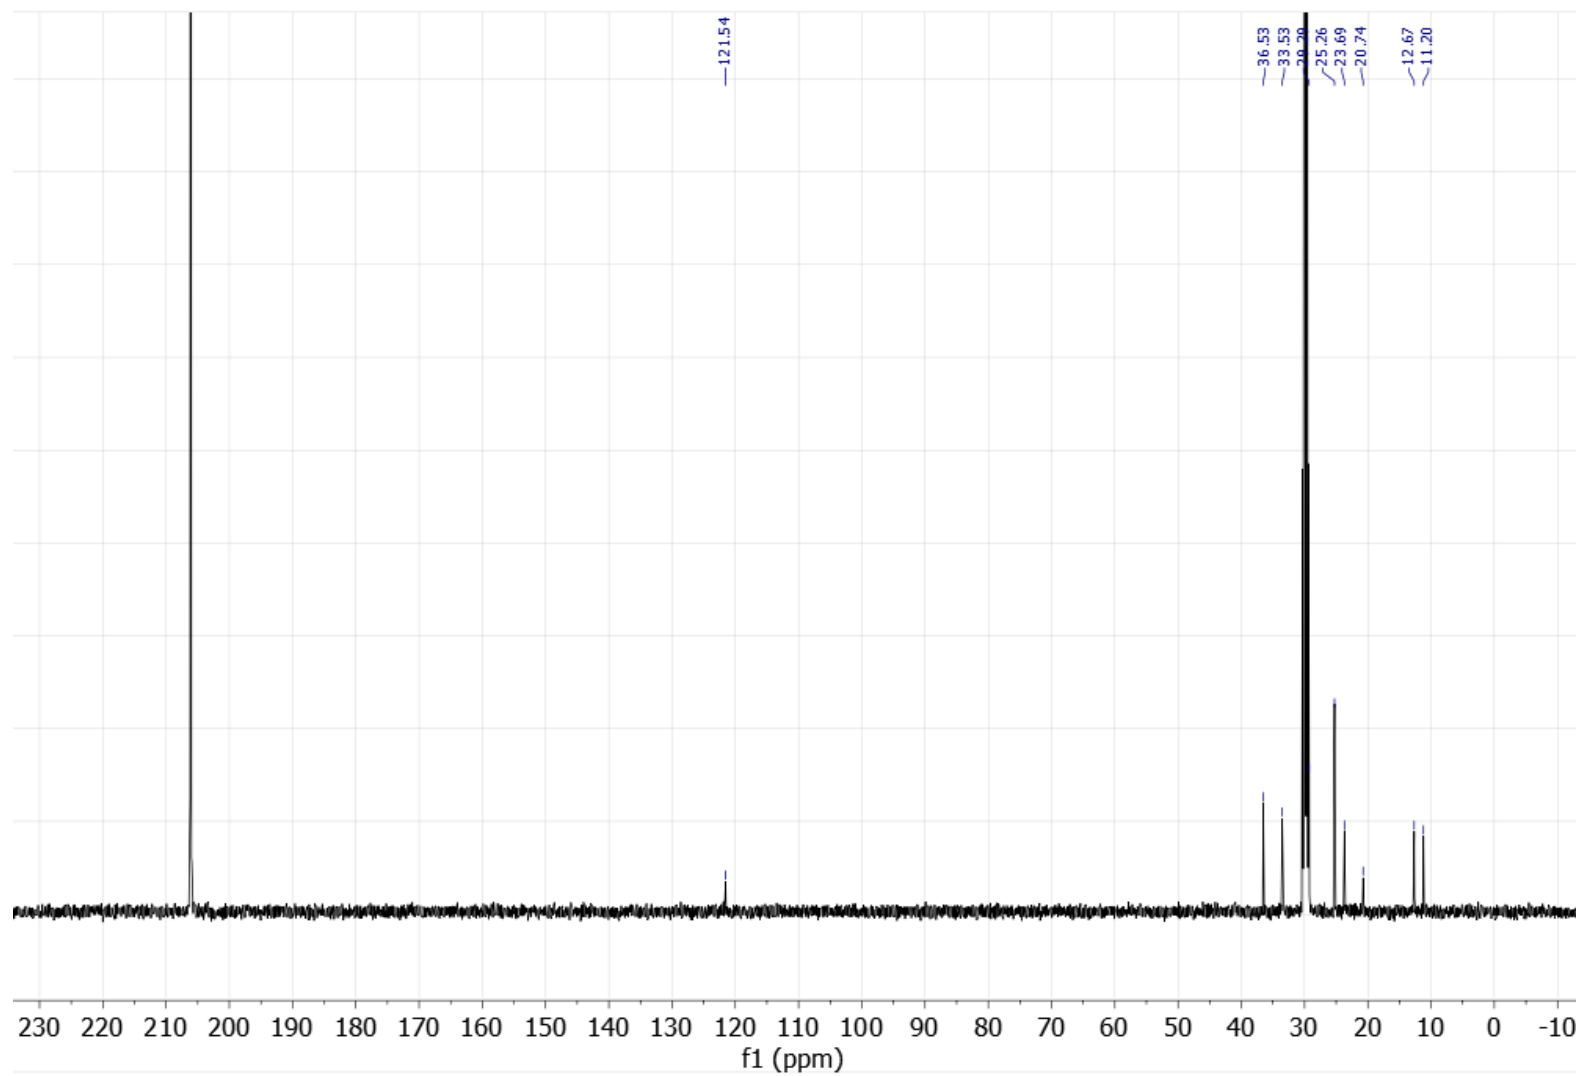

Compound **S12**  $^1\text{H}$  NMR (500 MHz,  $d_6$ -acetone)

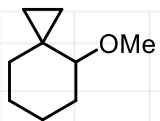

4-methoxyspiro[2.5]octane

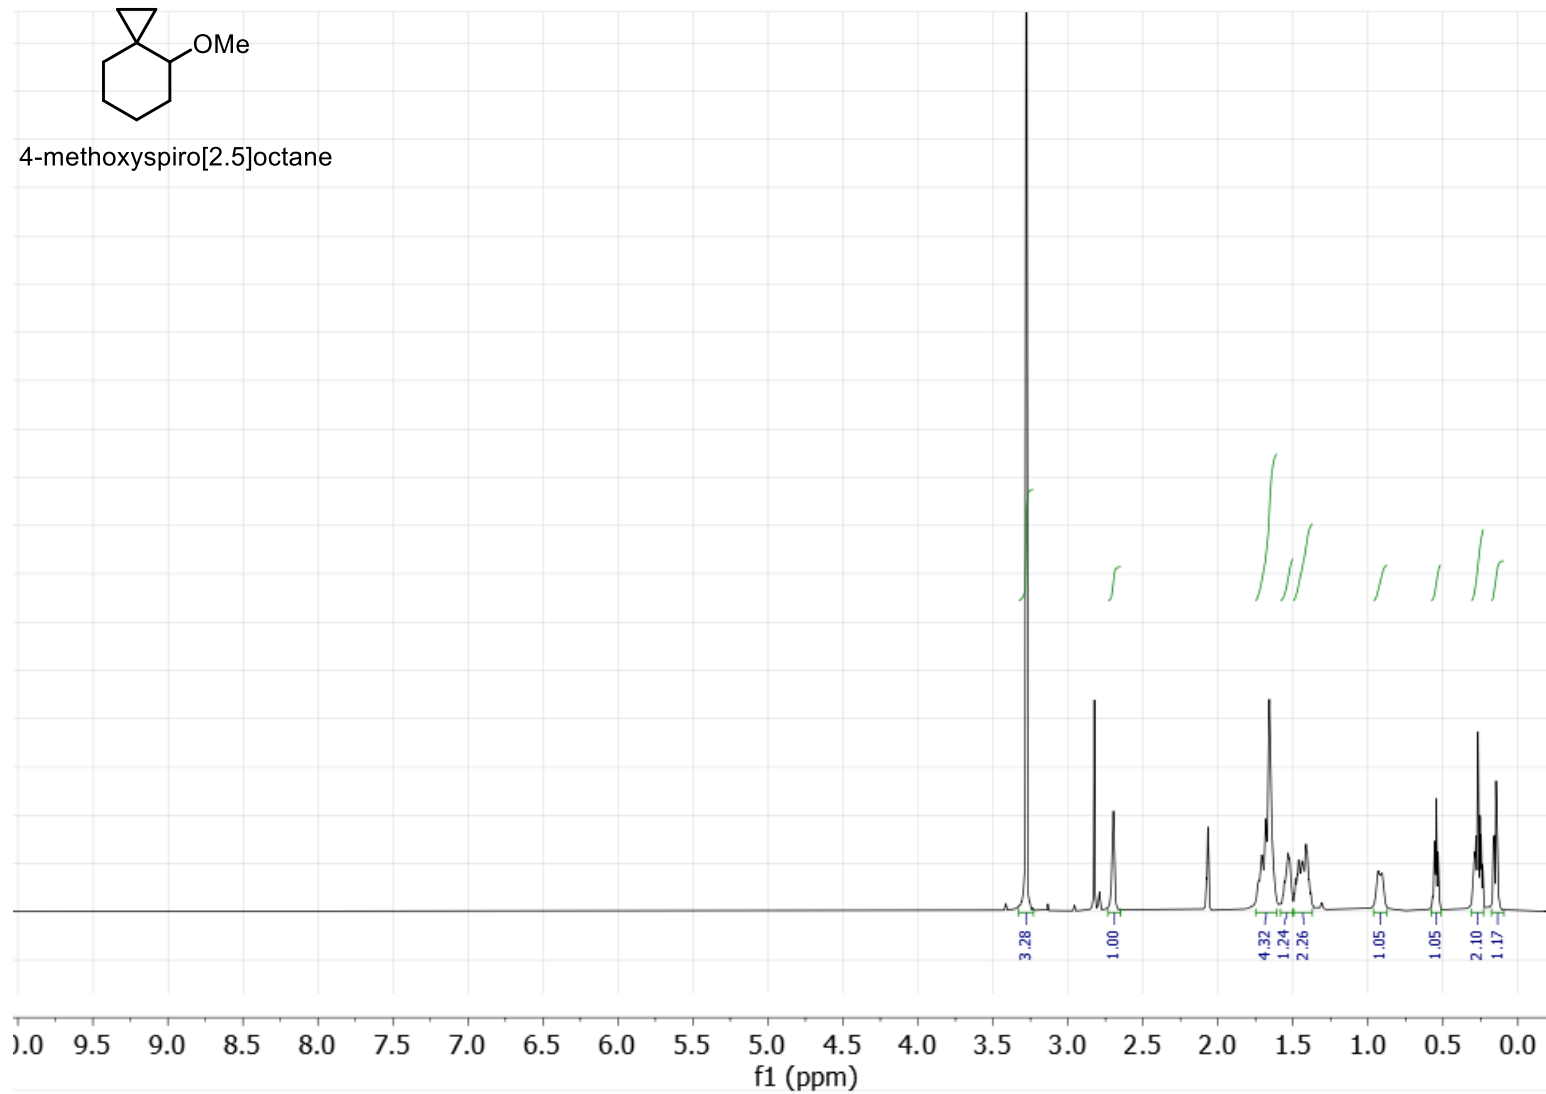

Compound **S12**  $^{13}\text{C}$  NMR (126 MHz,  $d_6$ -acetone)

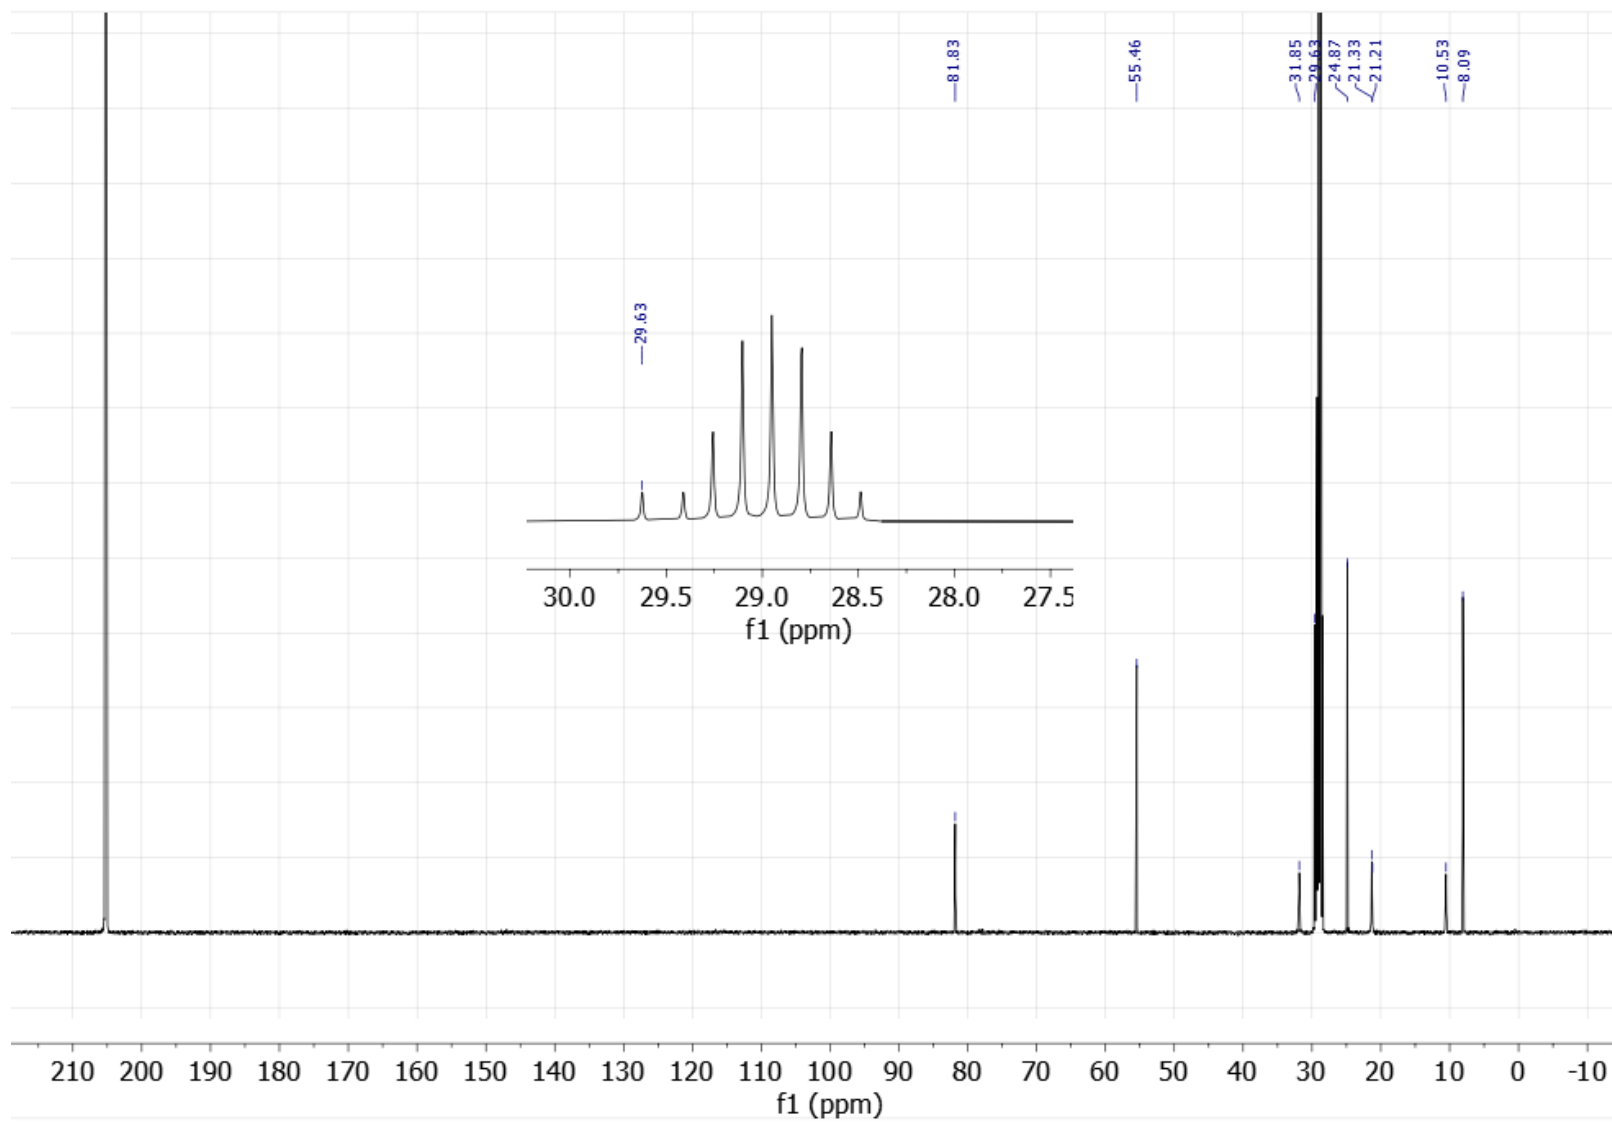

Compound **S13**  $^1\text{H}$  NMR (500 MHz,  $d_6$ -acetone)

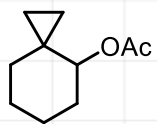

spiro[2.5]octan-4-yl acetate

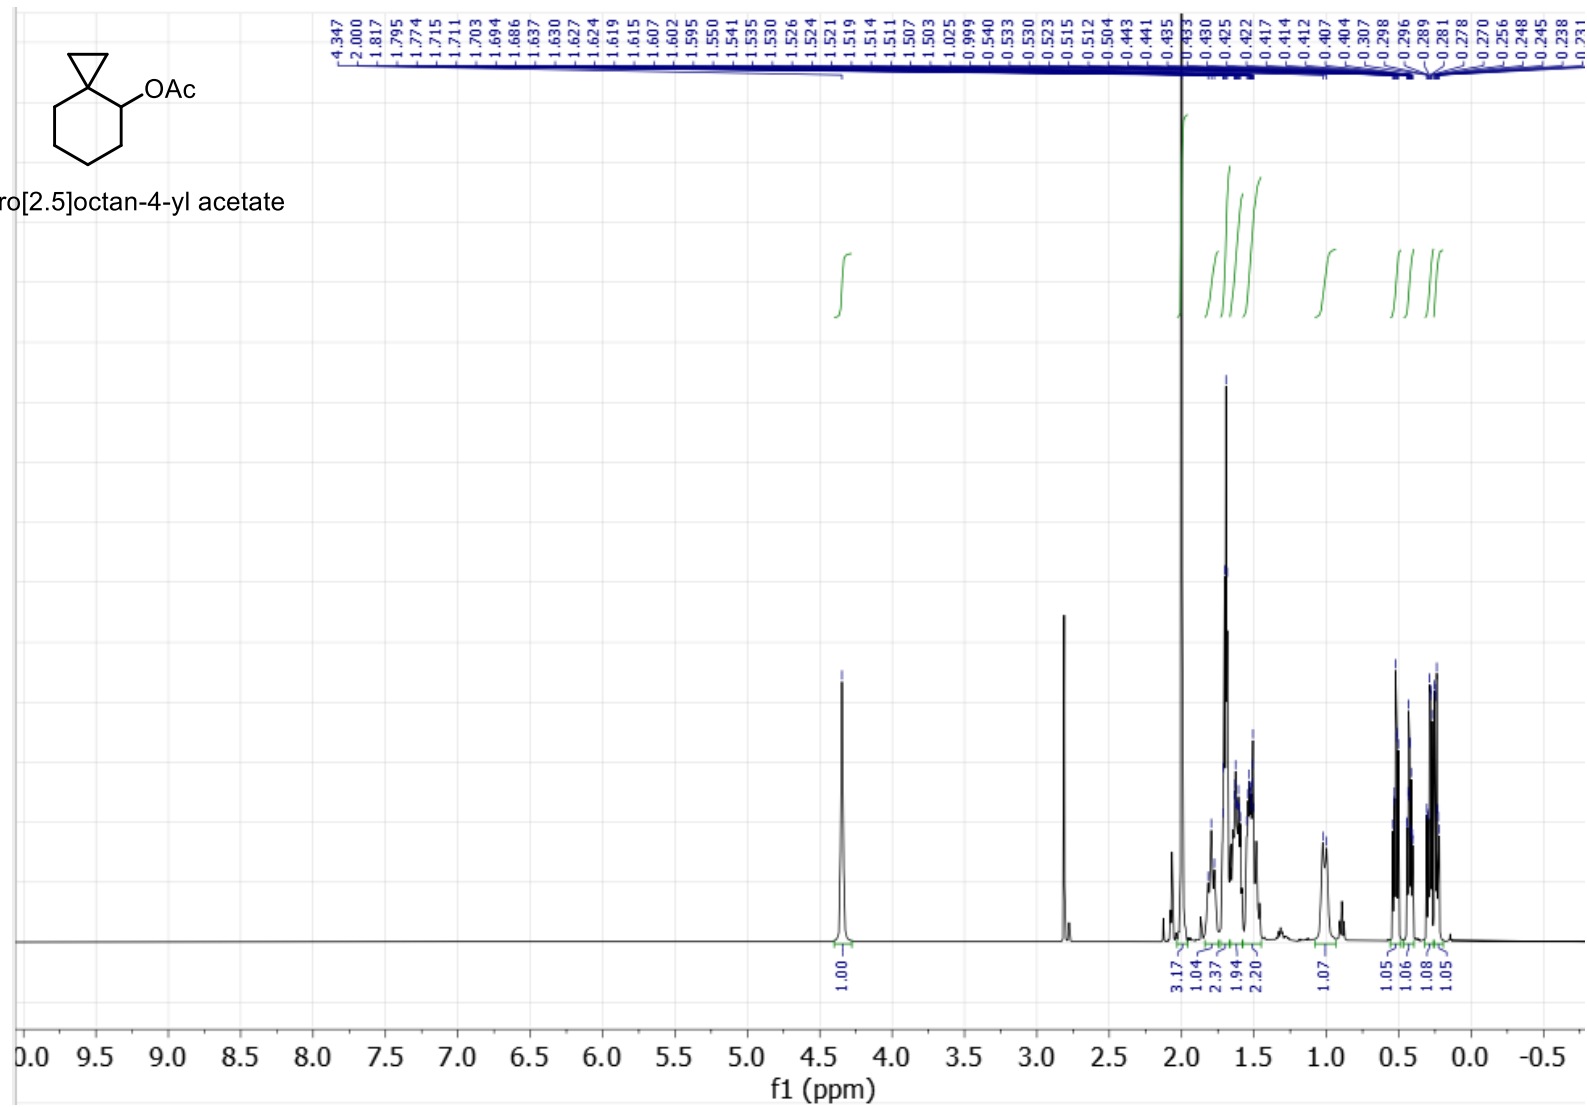

Compound **S13**  $^{13}\text{C}$  NMR (126 MHz,  $d_6$ -acetone)

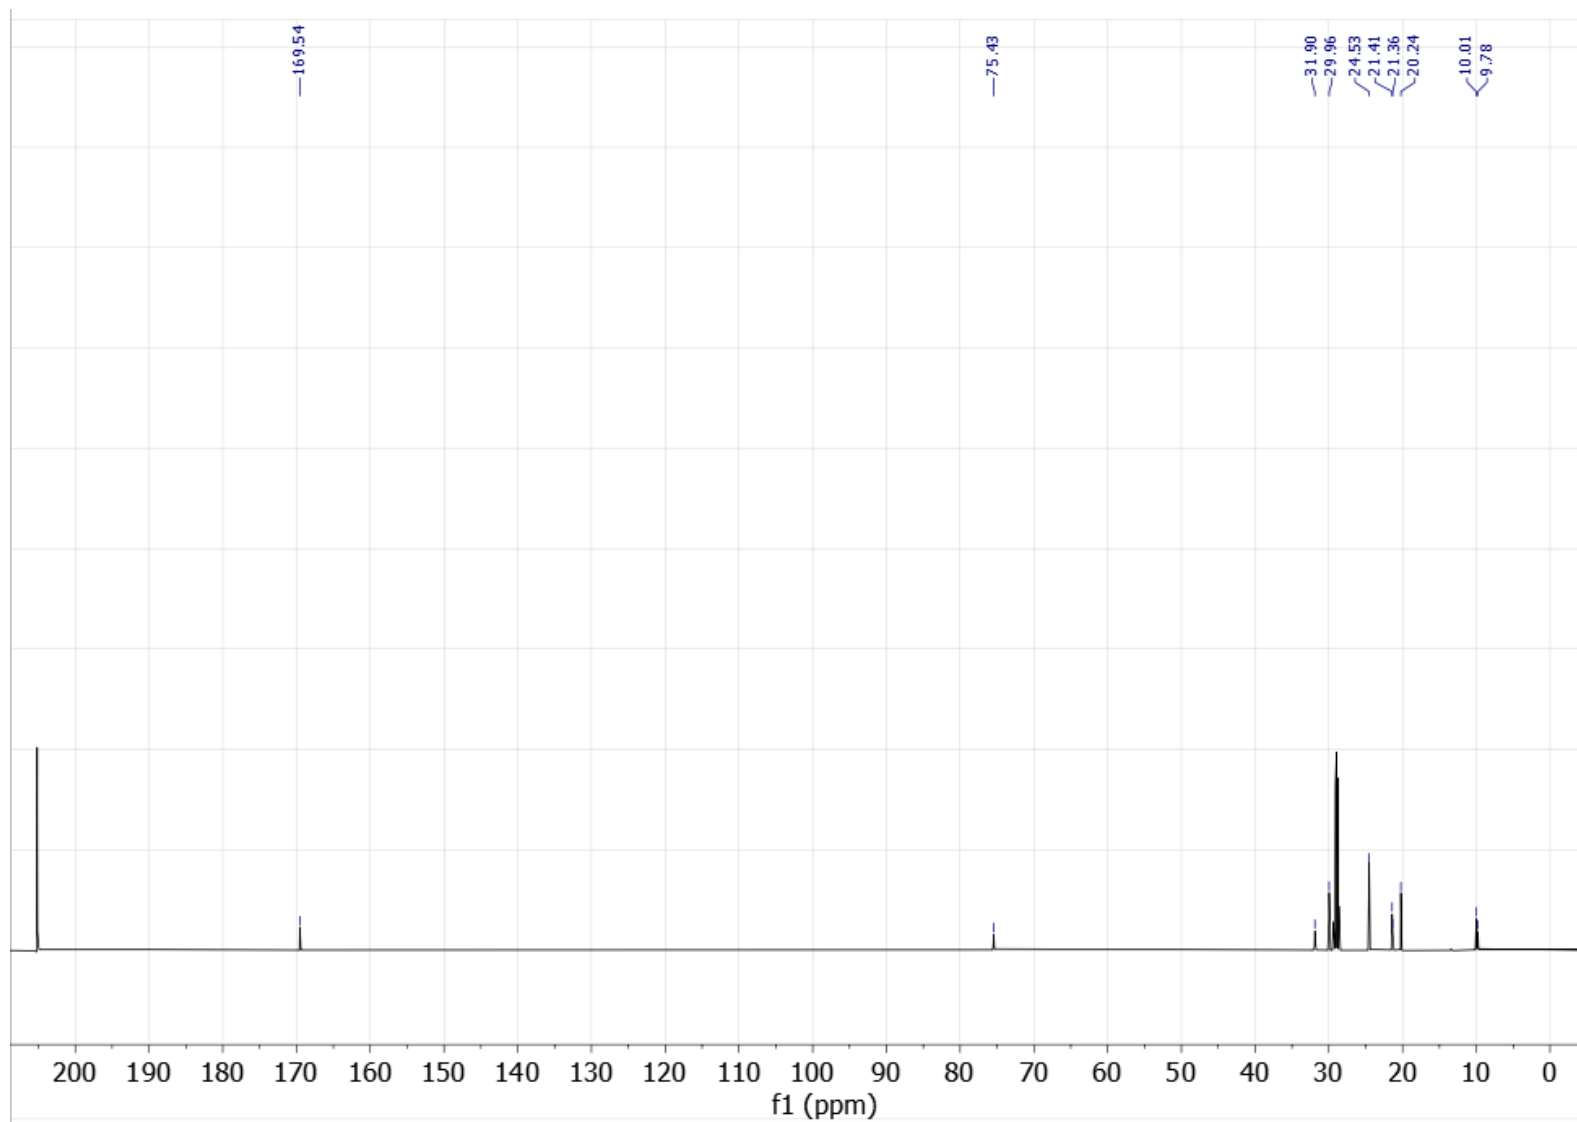

Compound **S14**  $^1\text{H}$  NMR (126 MHz,  $\text{CDCl}_3$ )

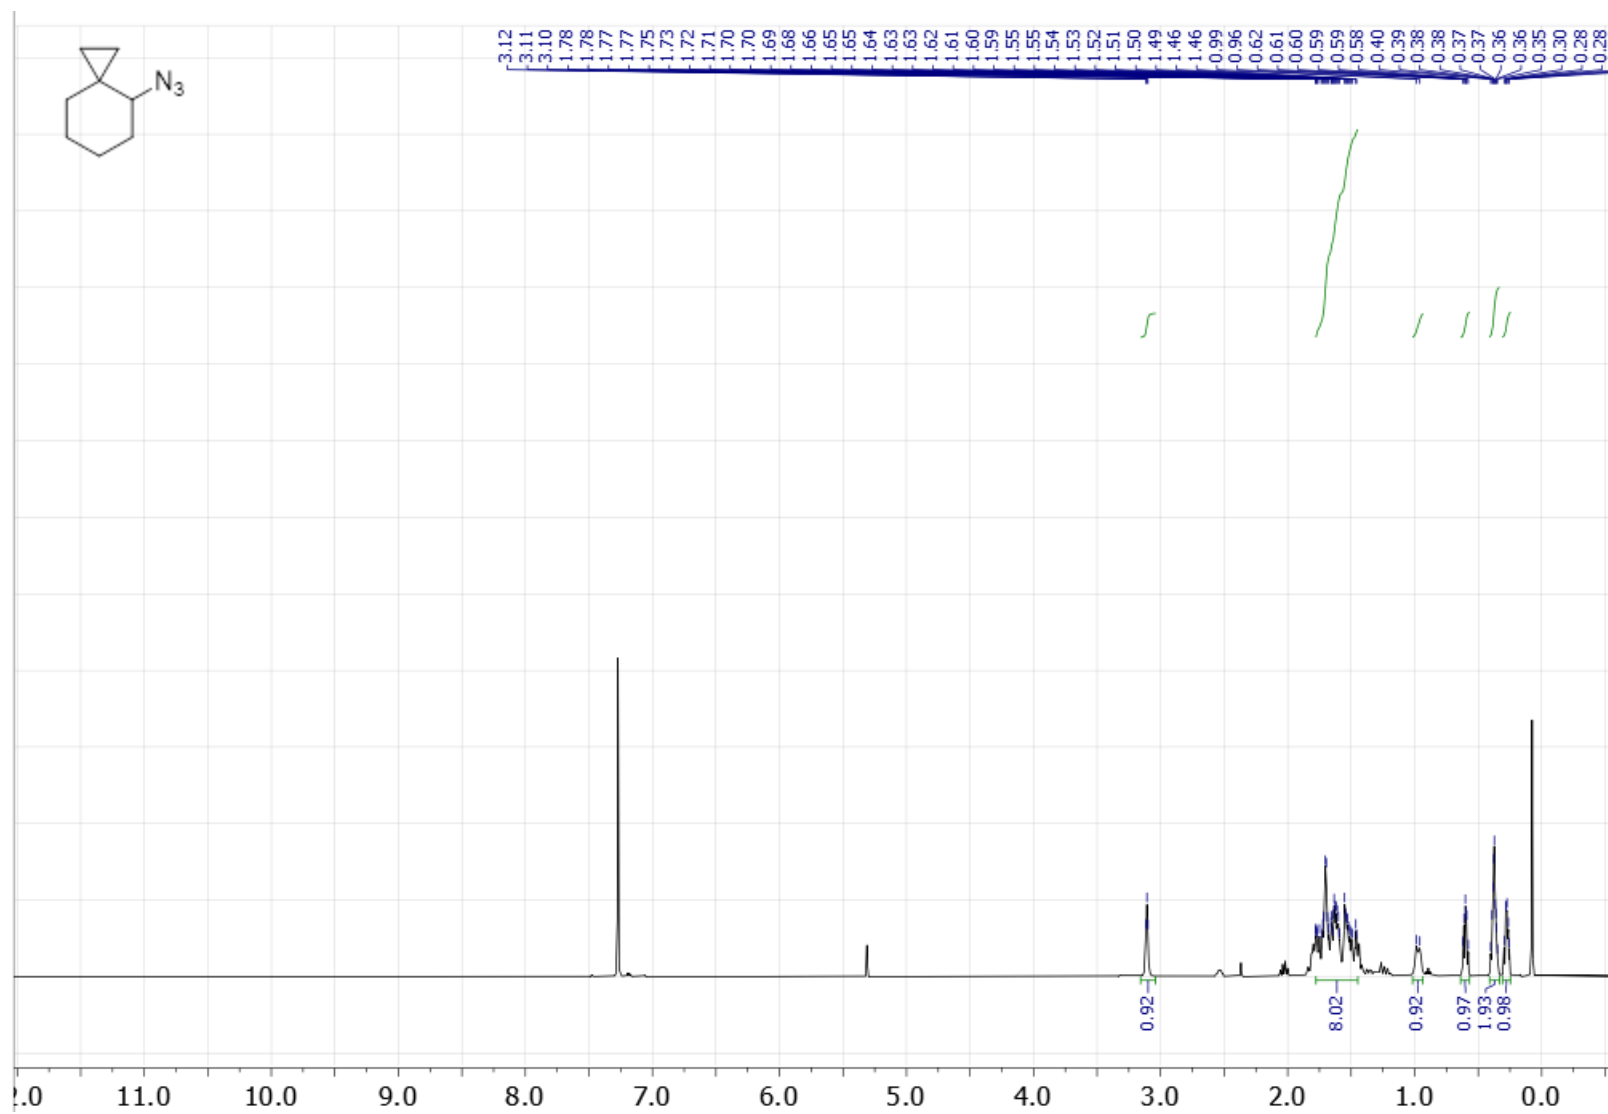



Compound **S15-neutral**  $^1\text{H}$  NMR (500 MHz,  $d_2$ -DCM)

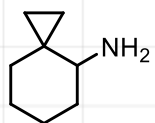

spiro[2.5]octan-4-amine

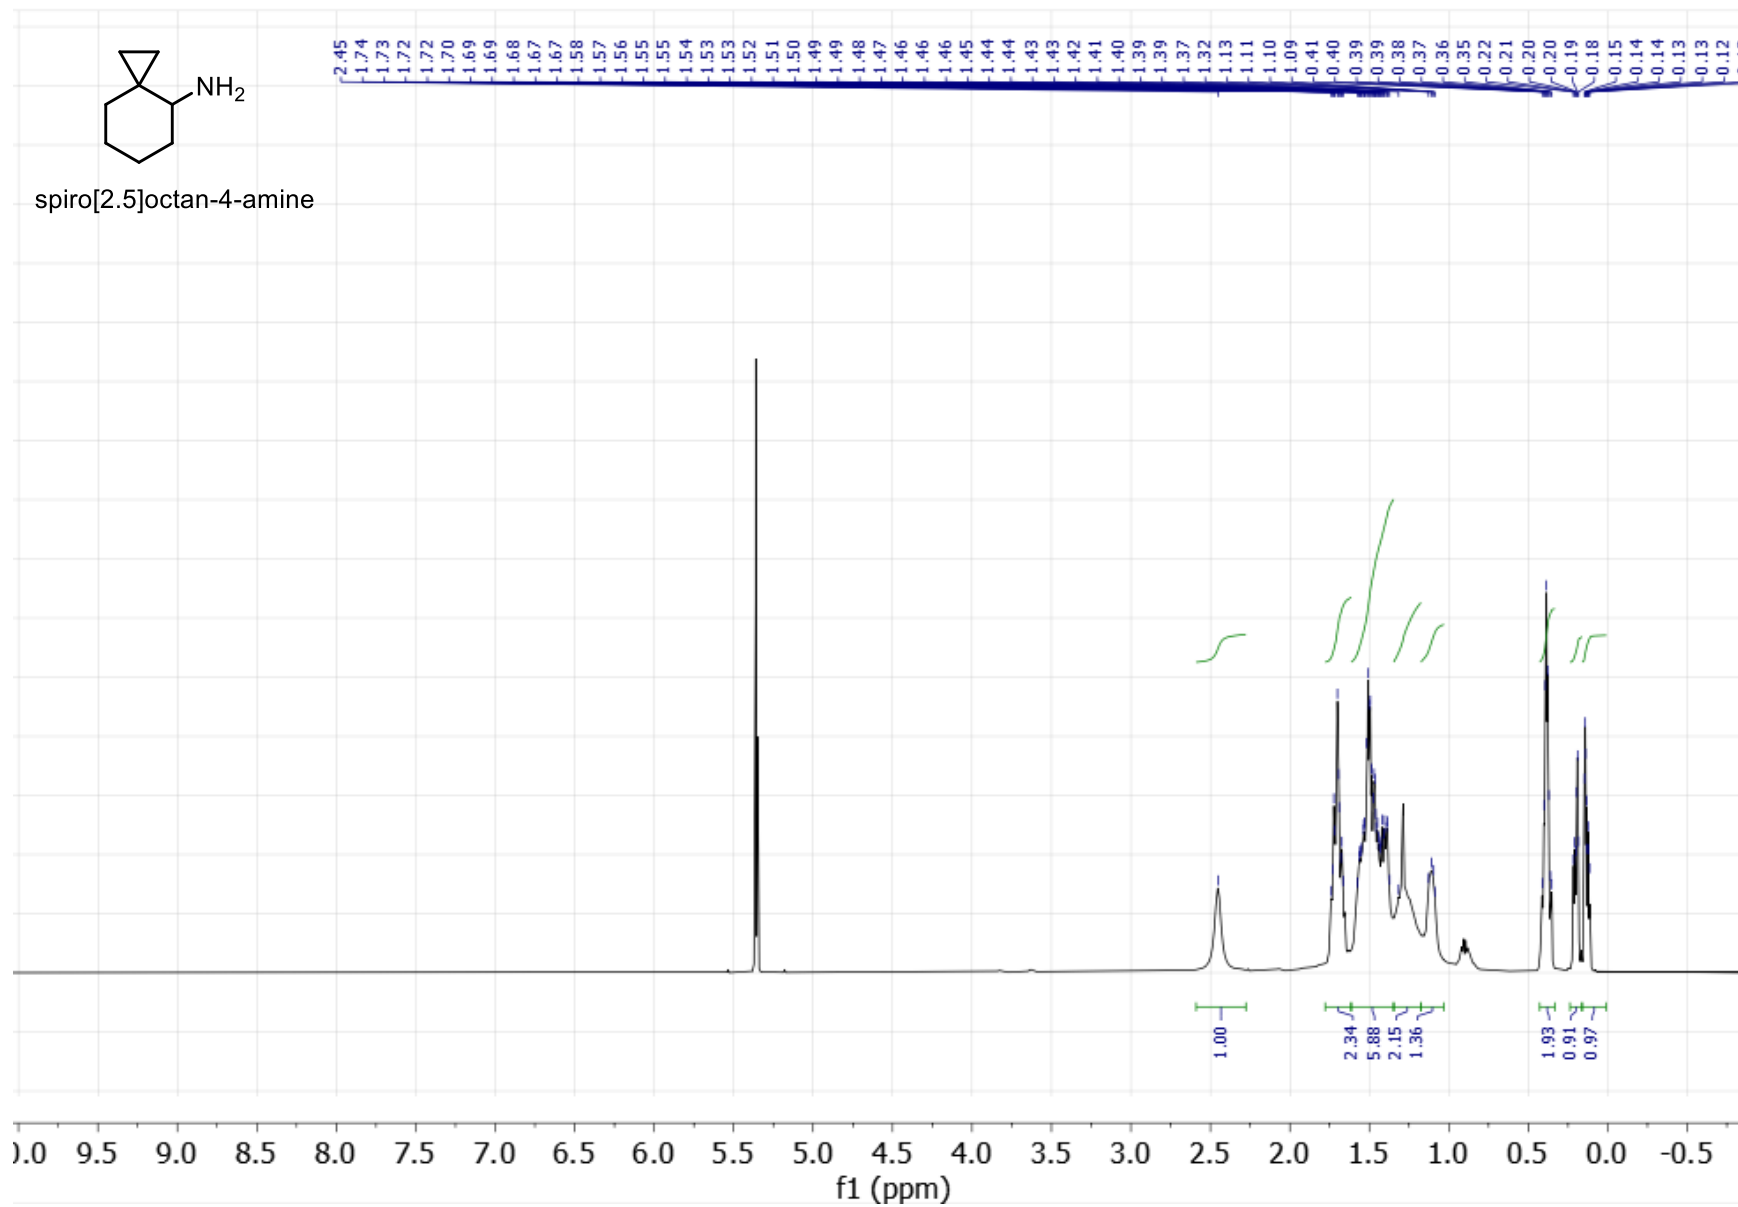

Compound **S15-HCl**  $^1\text{H}$  NMR (500 MHz,  $\text{CDCl}_3$ )

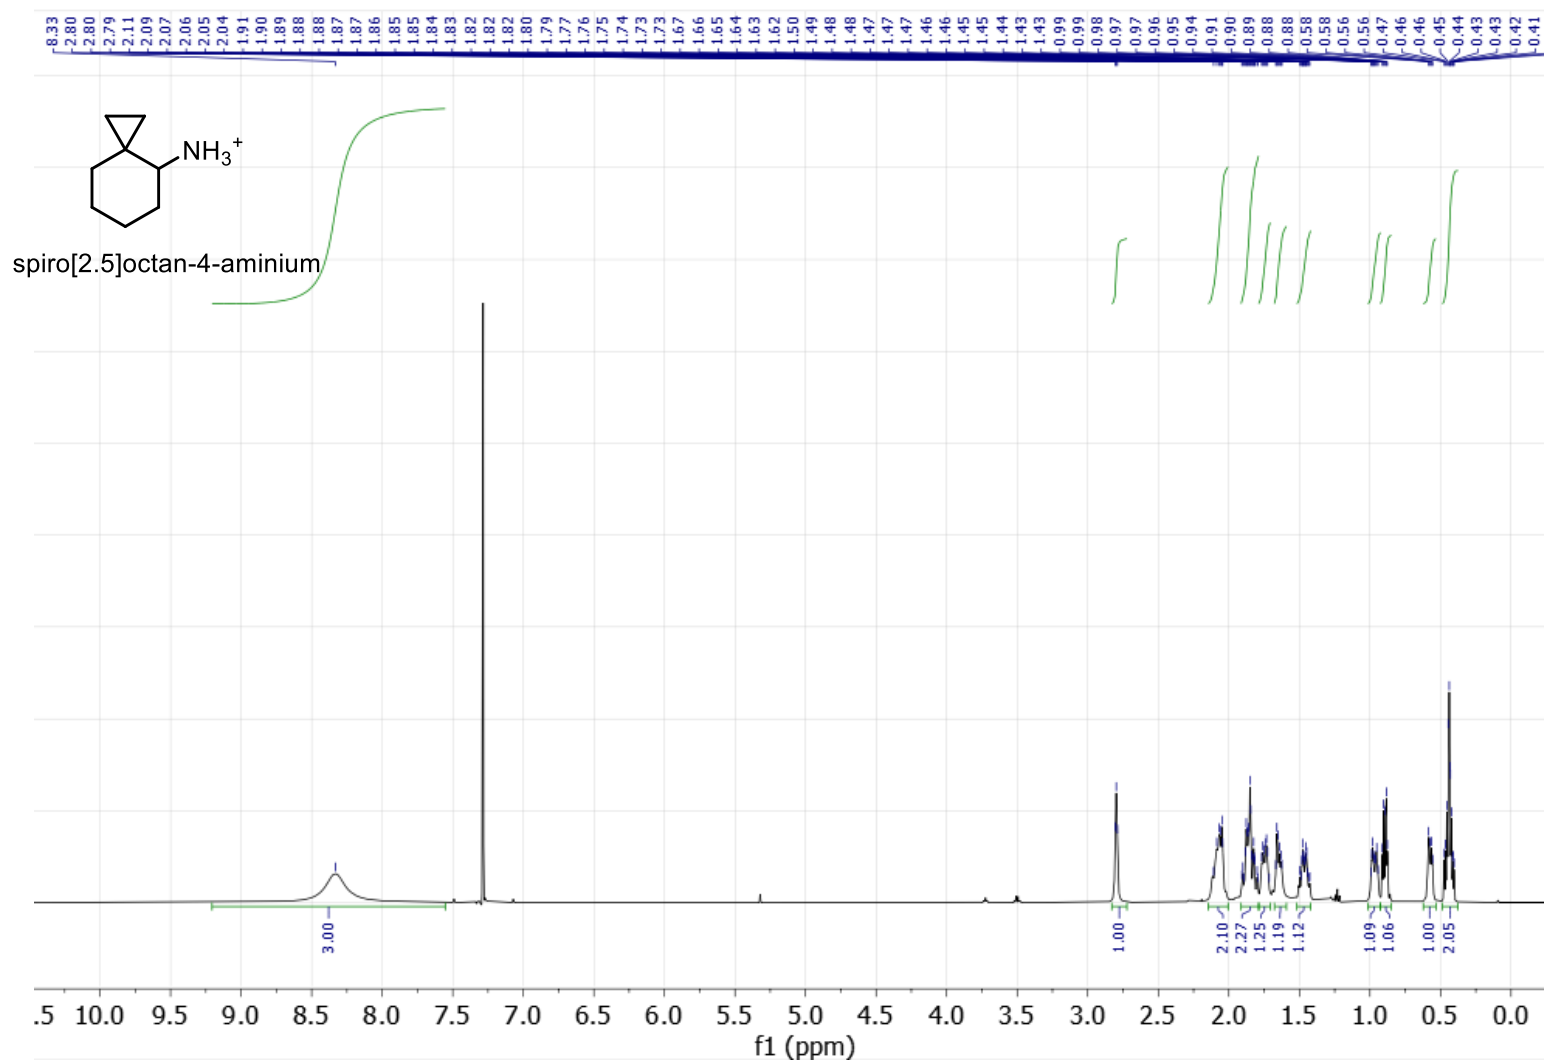

Compound **S15-HCl**  $^1\text{H}$  NMR (126 MHz,  $\text{CDCl}_3$ )

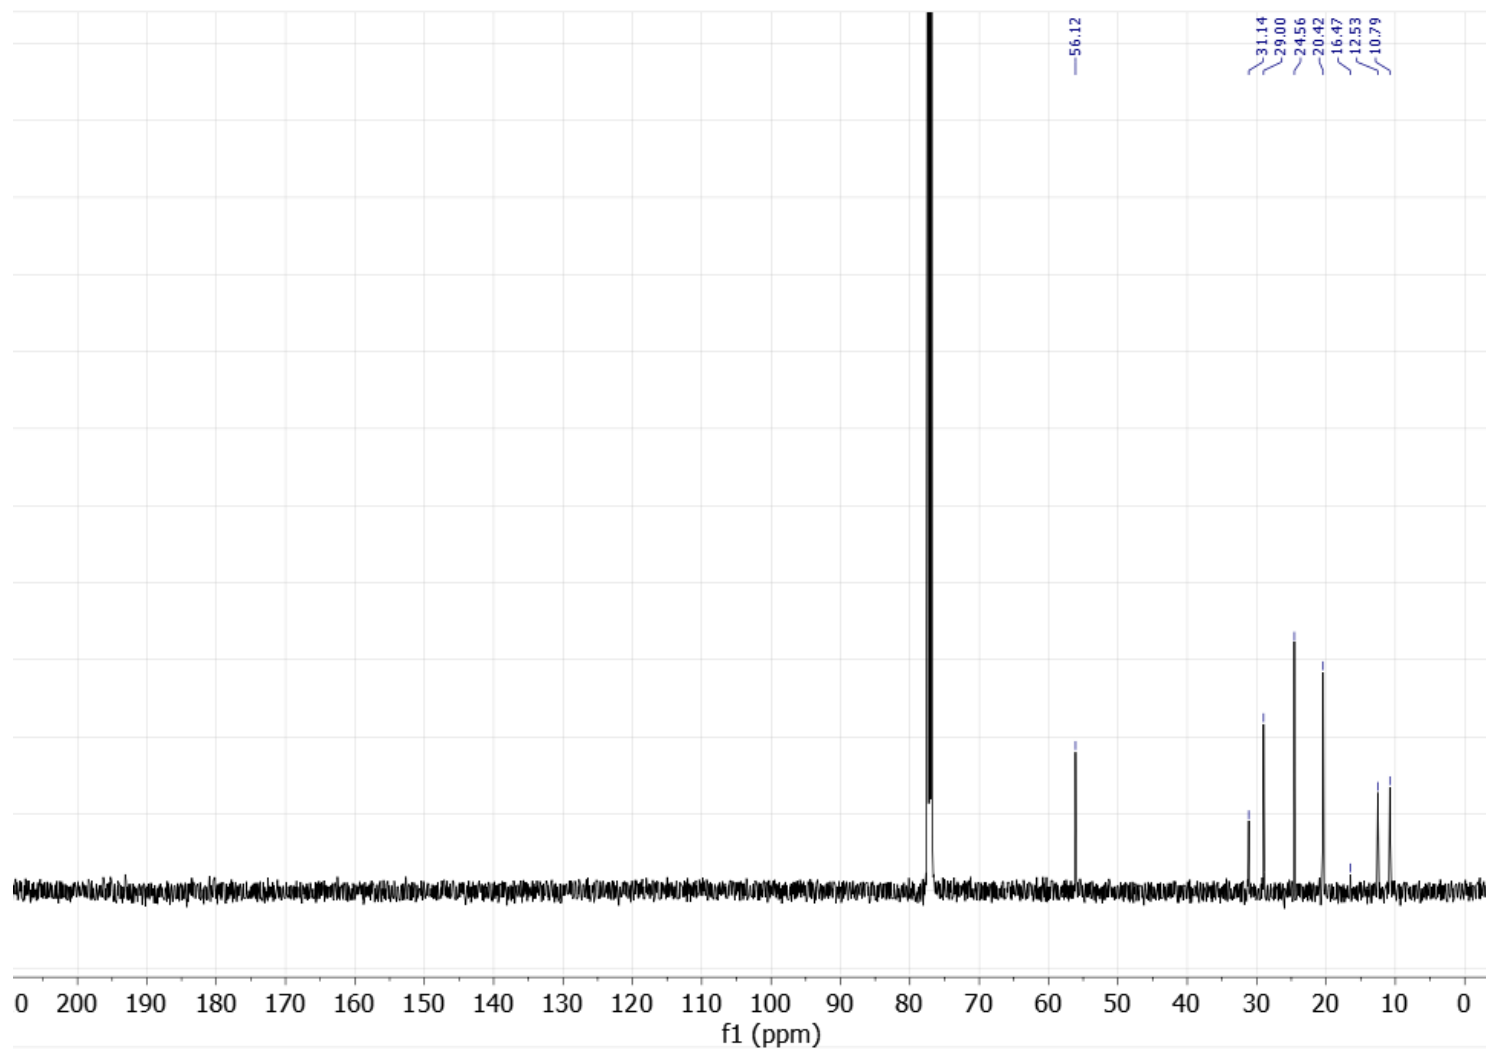

Compound 16 **crude**  $^1\text{H}$  NMR (500 MHz,  $d_6$ -Acetone)

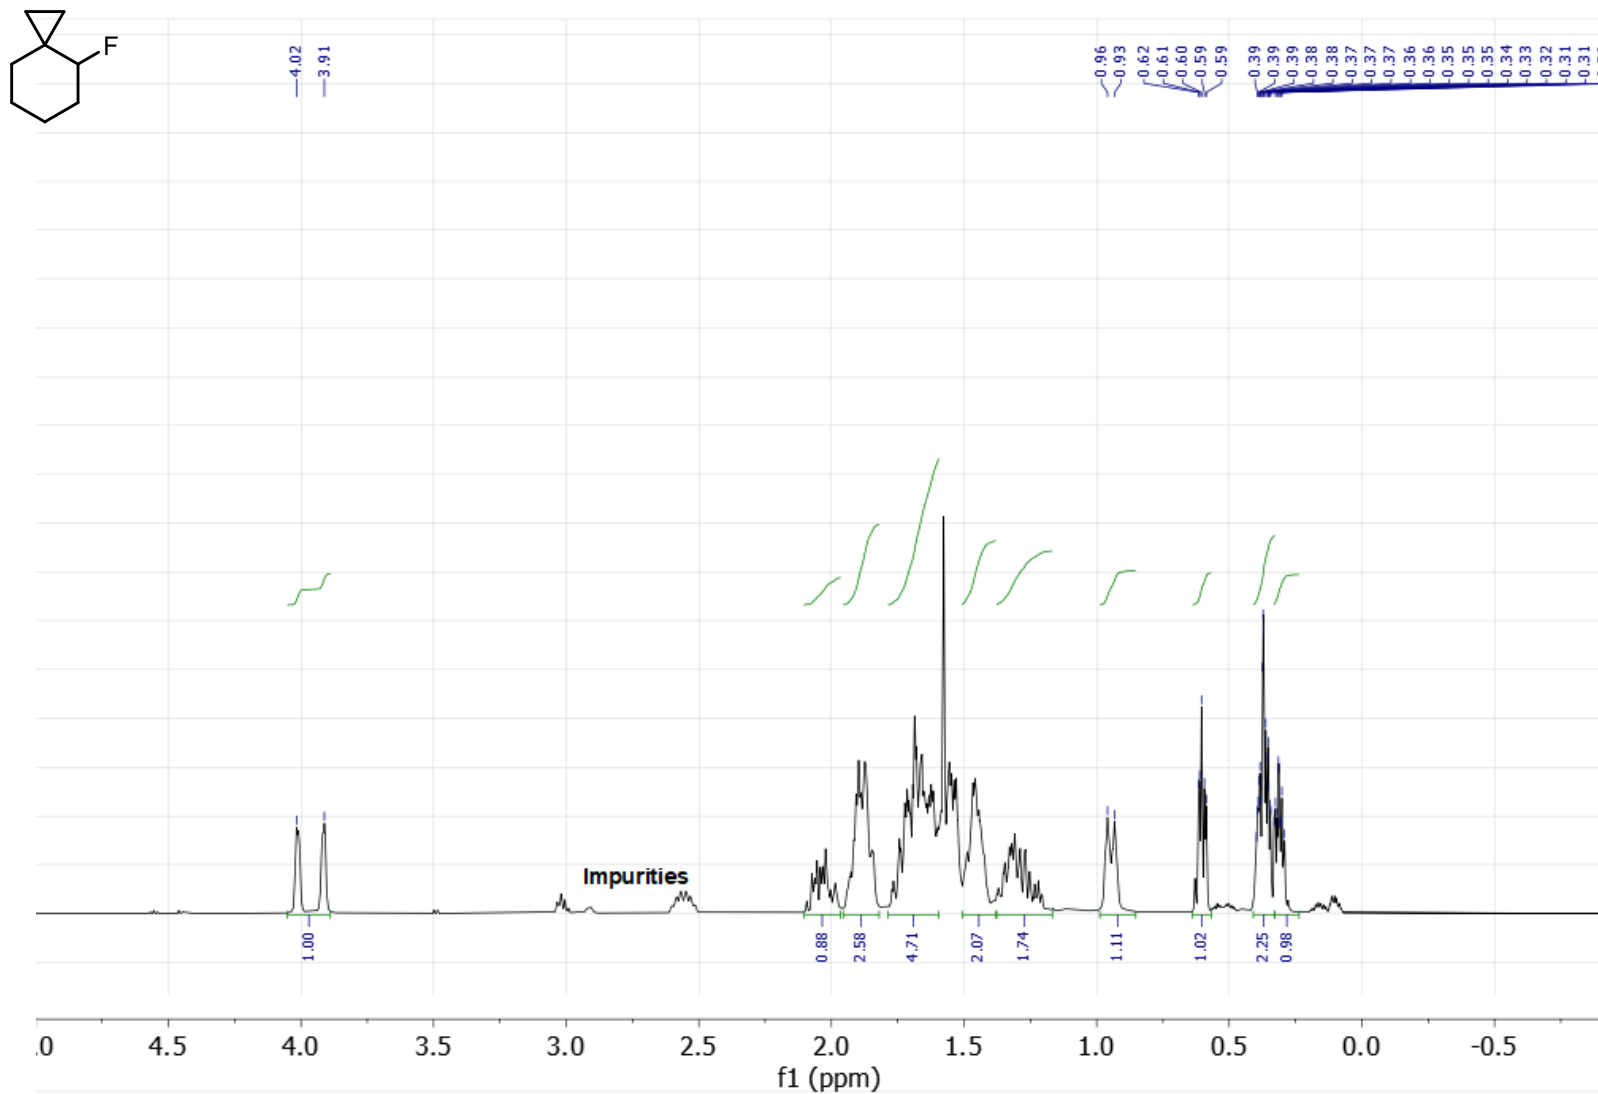

Compound **S17**  $^1\text{H}$  NMR (500 MHz,  $\text{CDCl}_3$ )

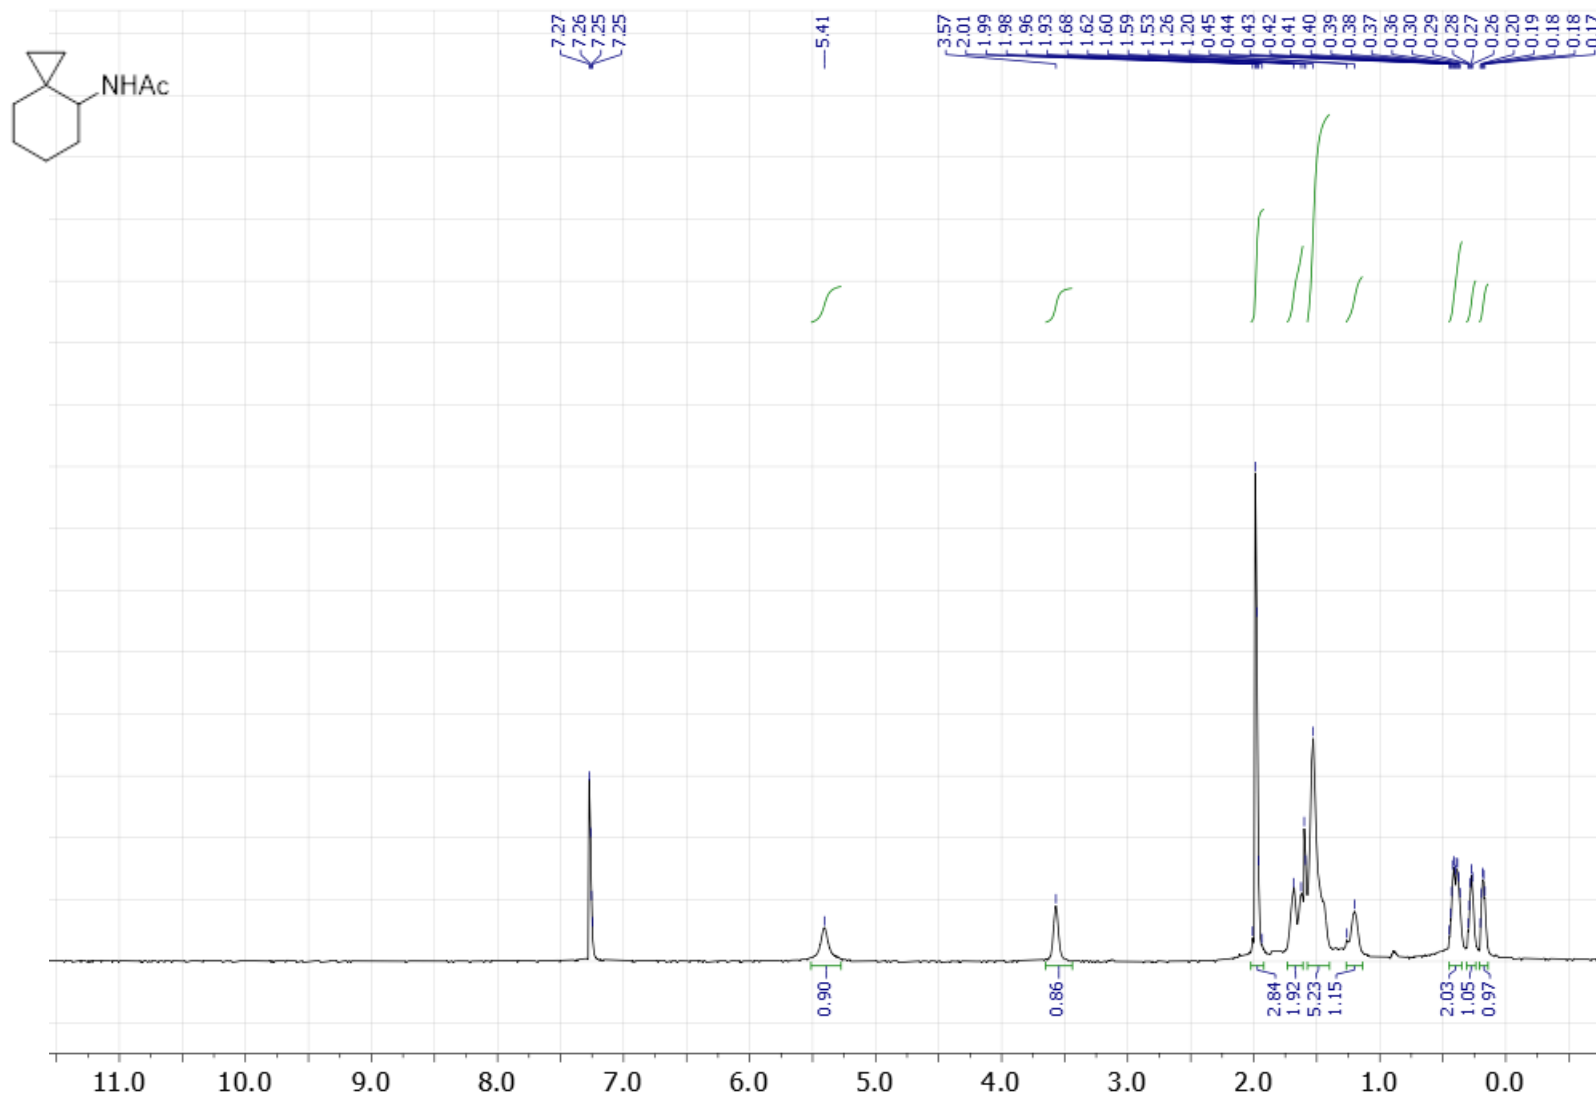

Compound **S17**  $^1\text{H}$  NMR (500 MHz,  $d_6$ -Acetone)

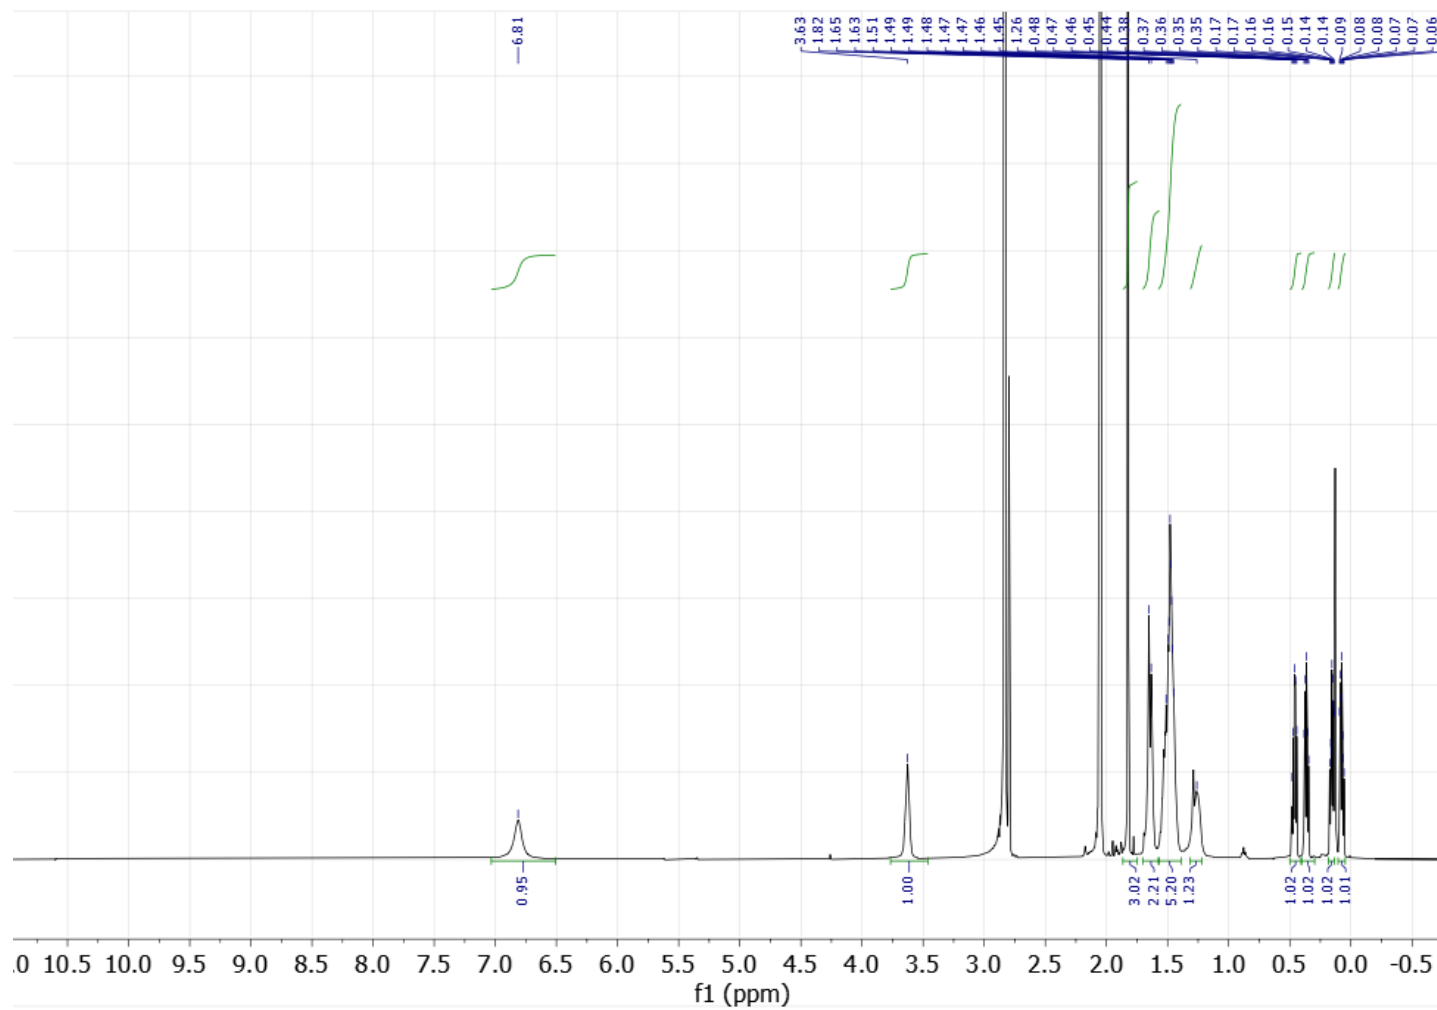

Compound **S17**  $^{13}\text{C}$  NMR (126 MHz,  $d_6$ -Acetone)

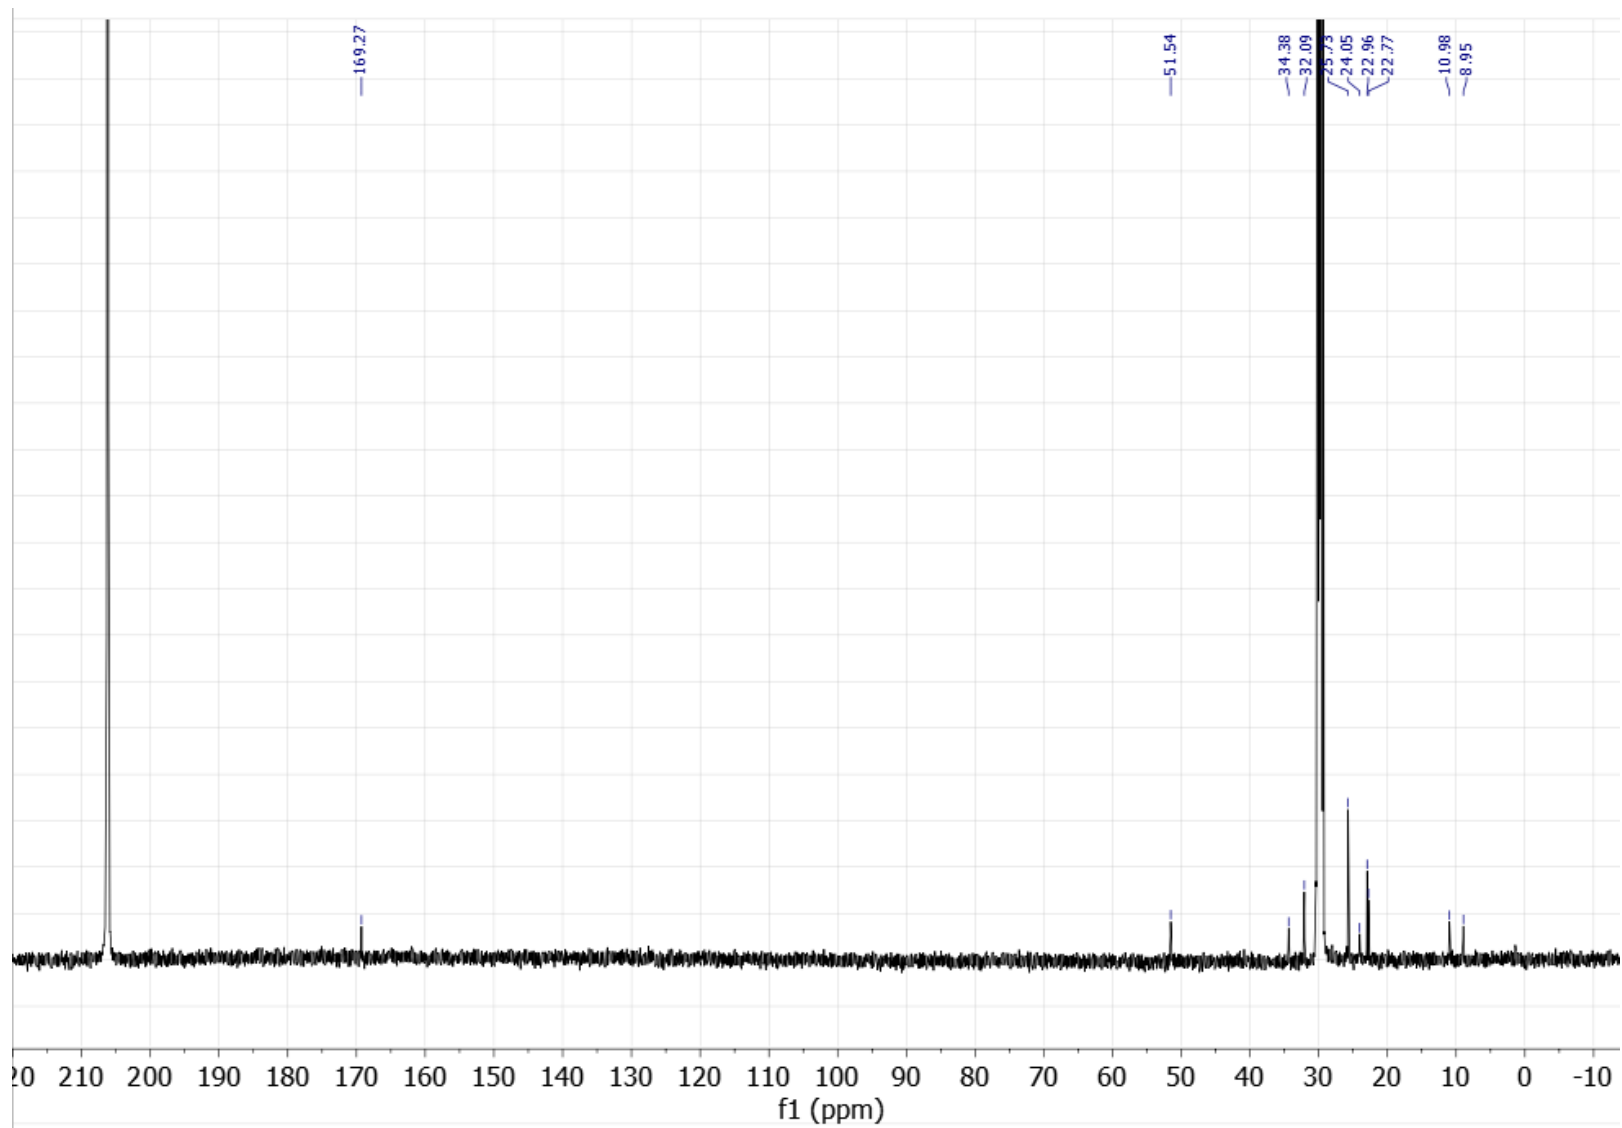

Compound S17 HSQC (126 MHz,  $d_6$ -Acetone)

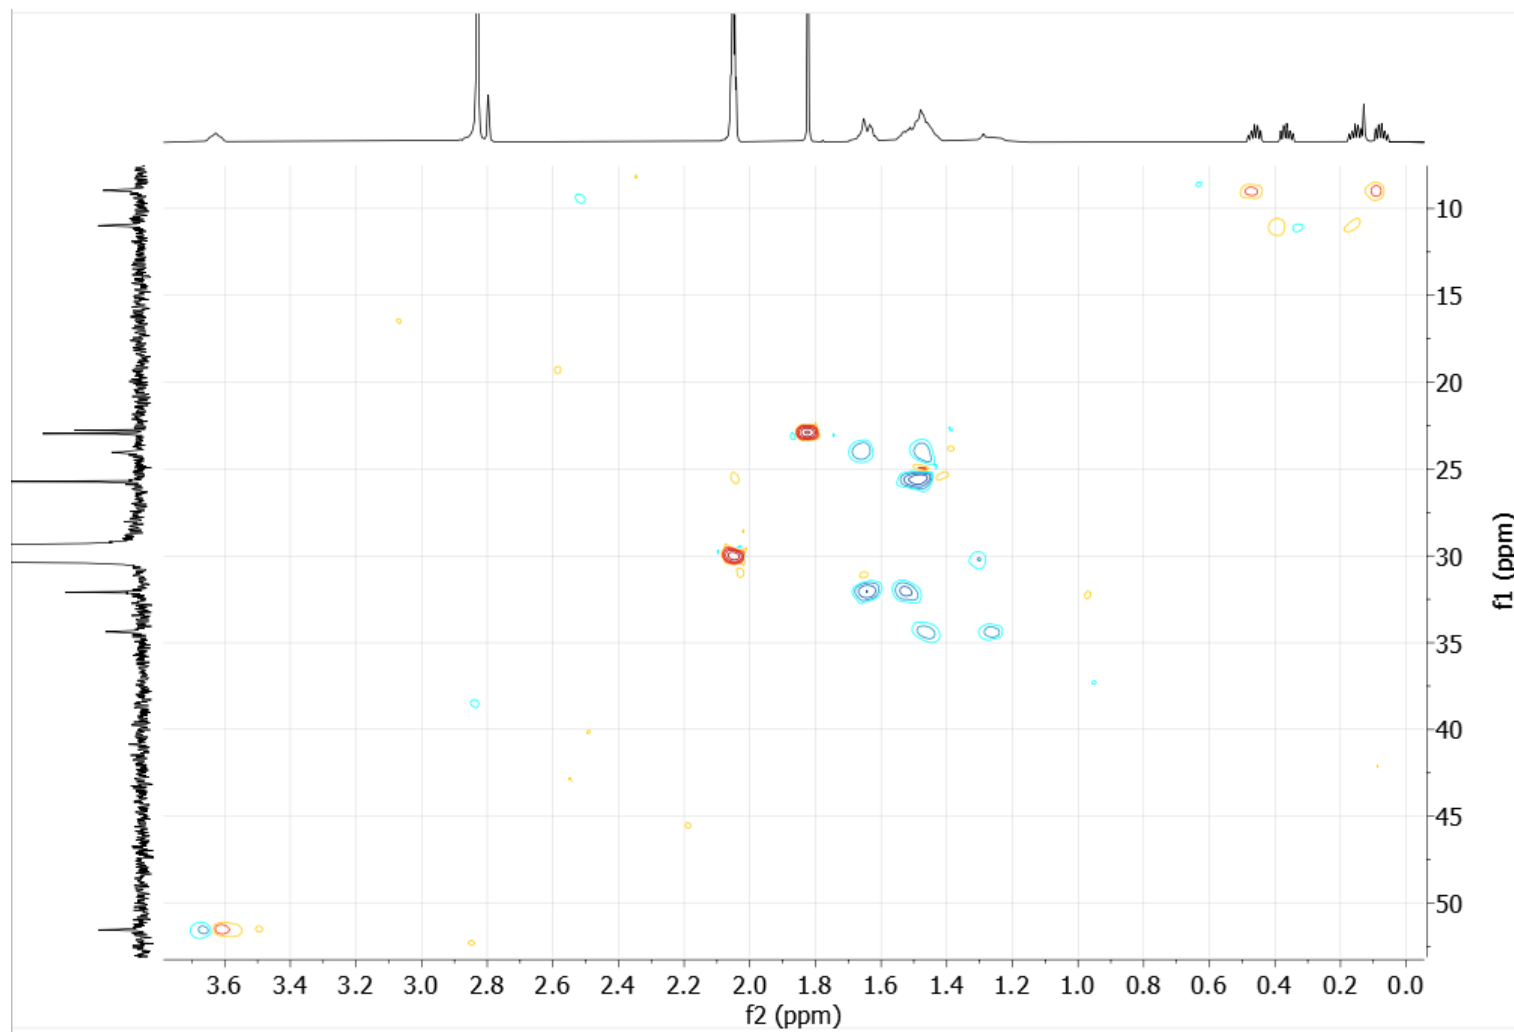



Compound **S18**  $^1\text{H}$  NMR (500 MHz,  $\text{CDCl}_3$ )

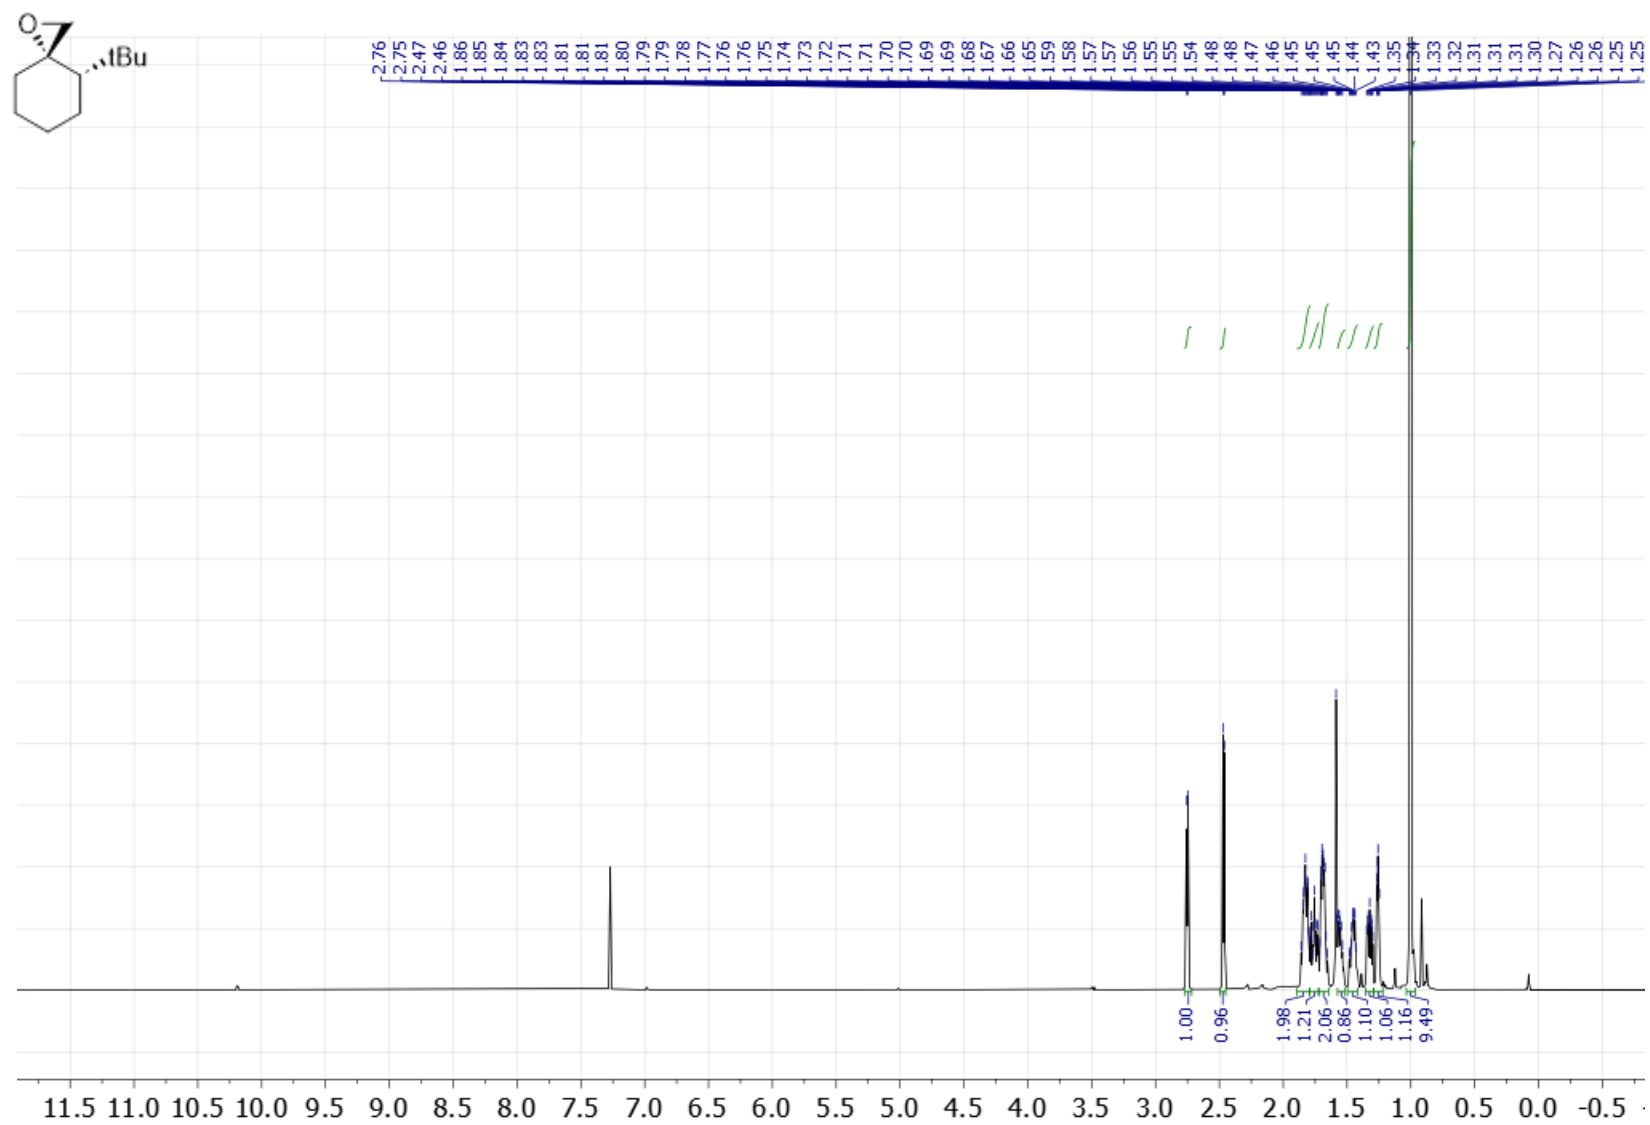

Compound **S18**  $^{13}\text{C}$  NMR (126 MHz,  $\text{CDCl}_3$ )

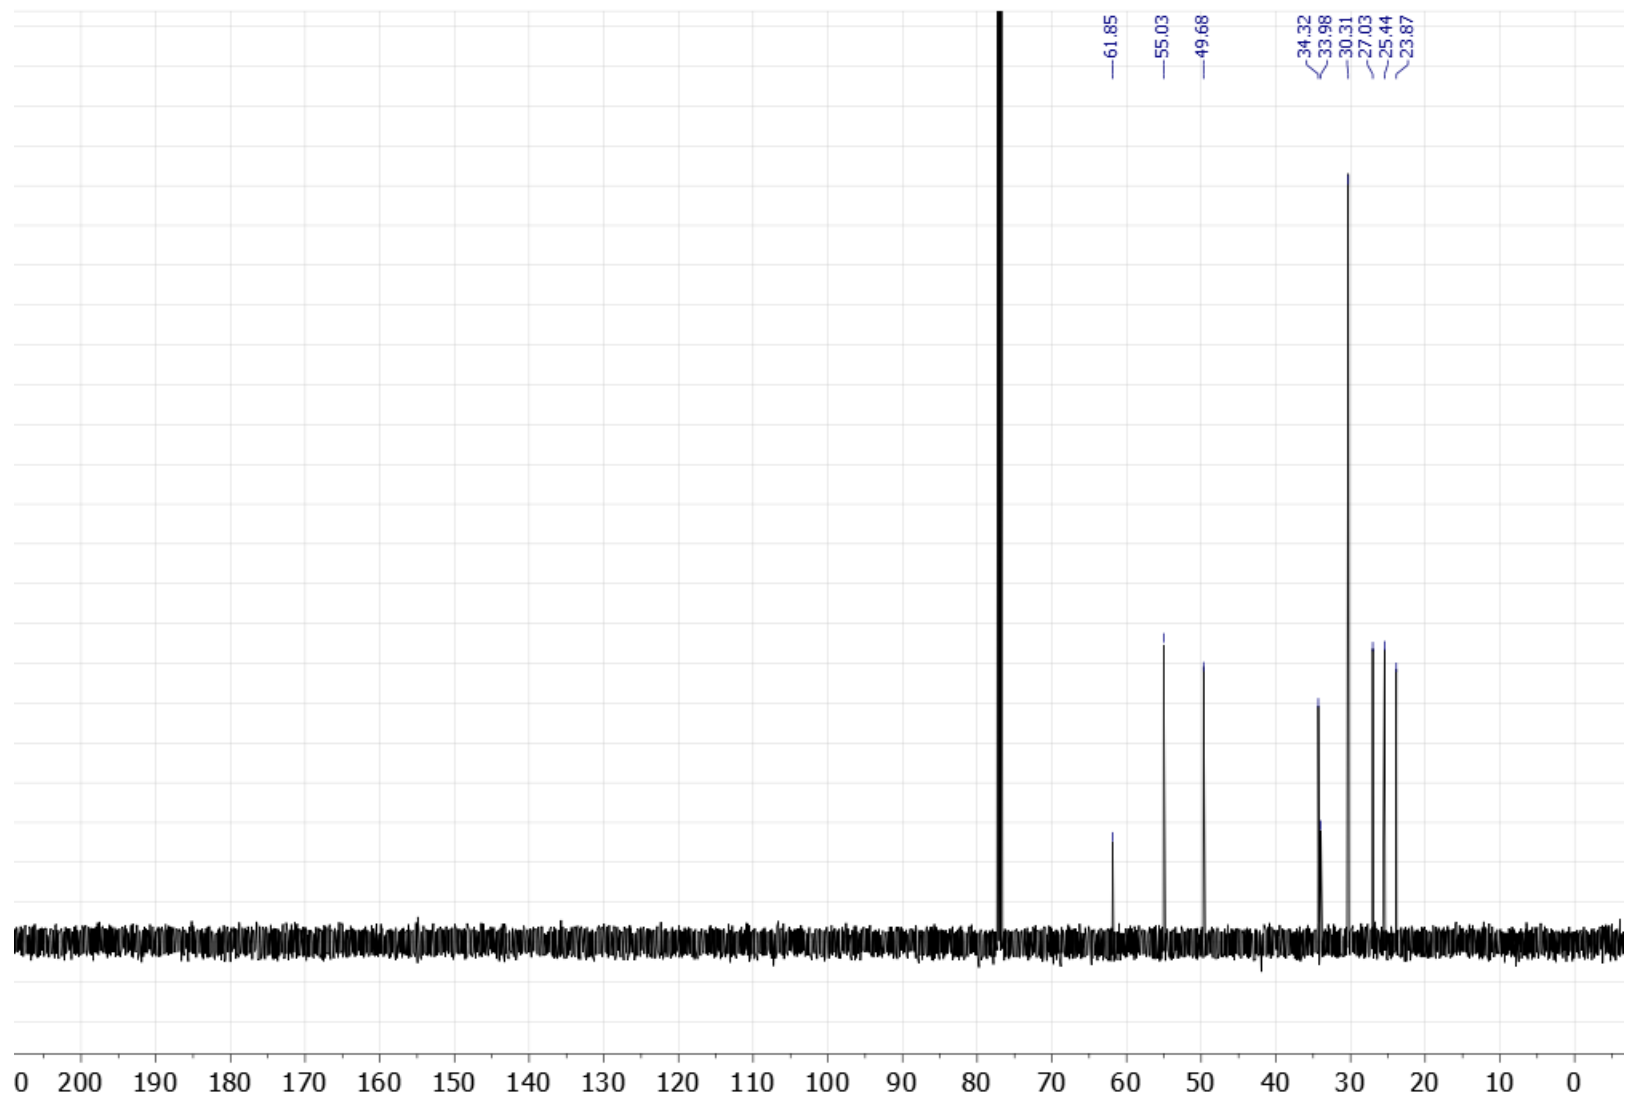

Compound **S19**  $^1\text{H}$  NMR (500 MHz,  $\text{CDCl}_3$ )

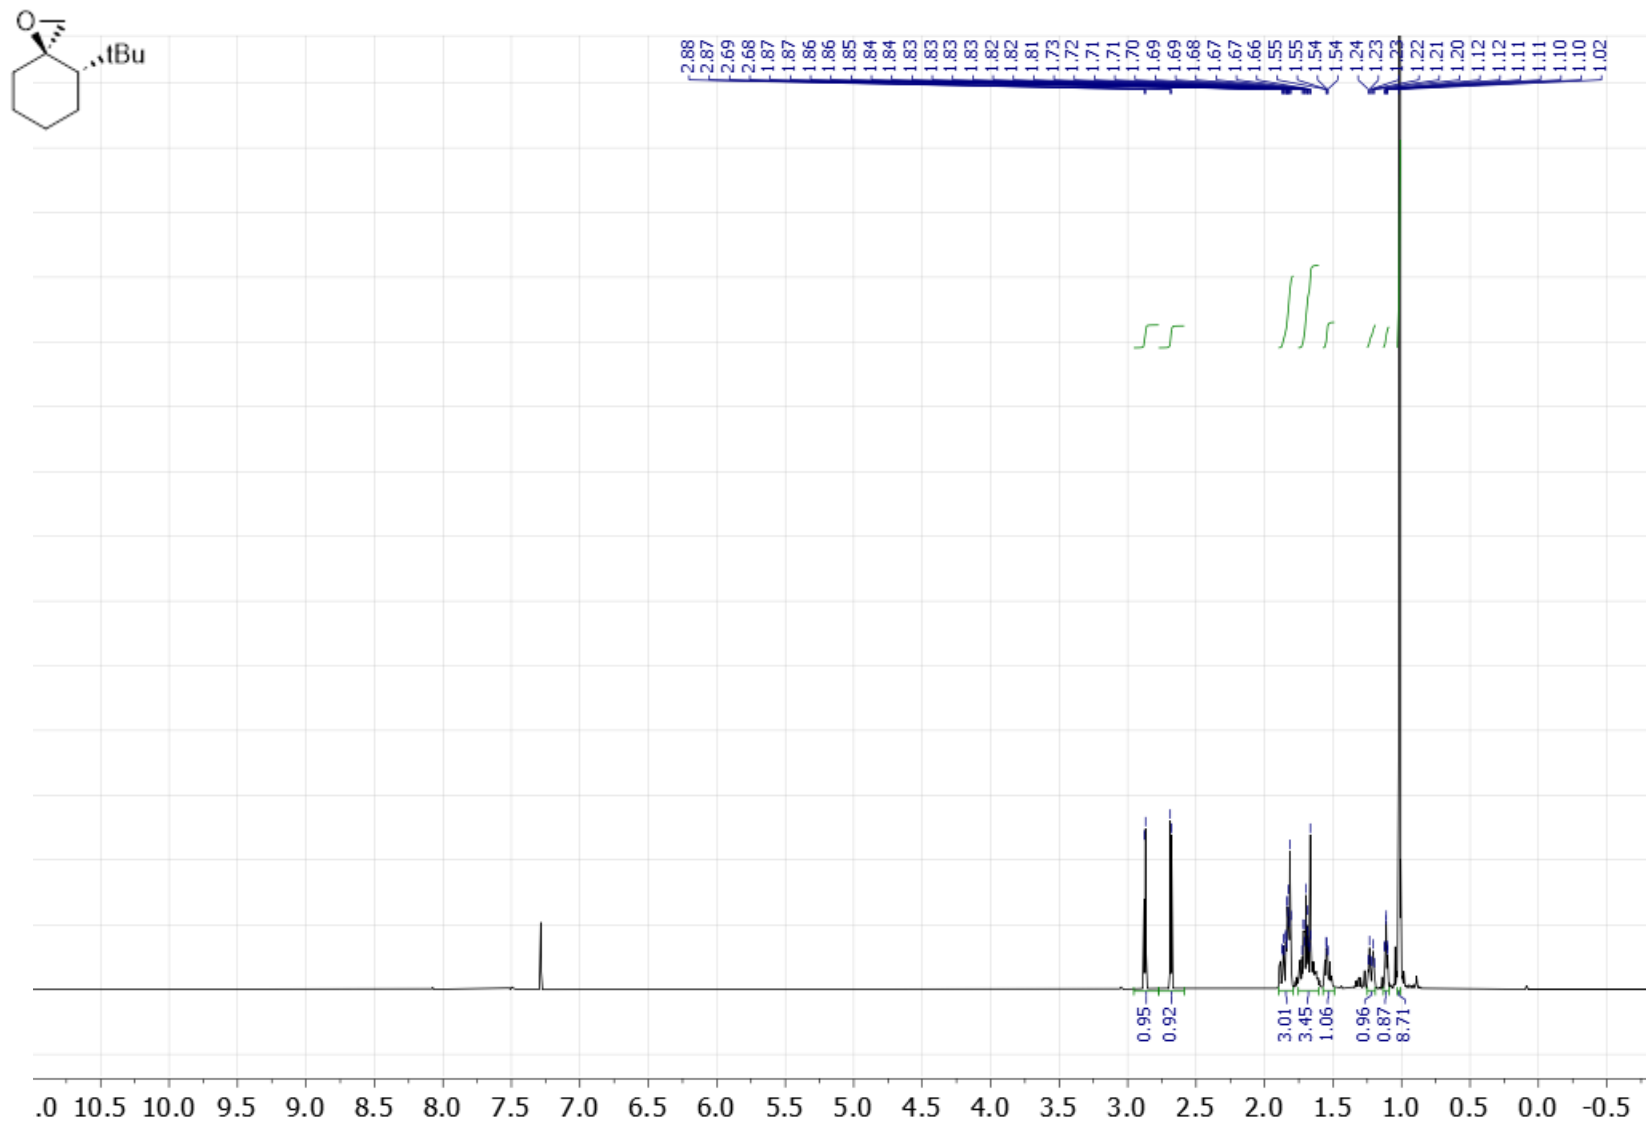

Compound **S19**  $^{13}\text{C}$  NMR (126 MHz,  $\text{CDCl}_3$ )

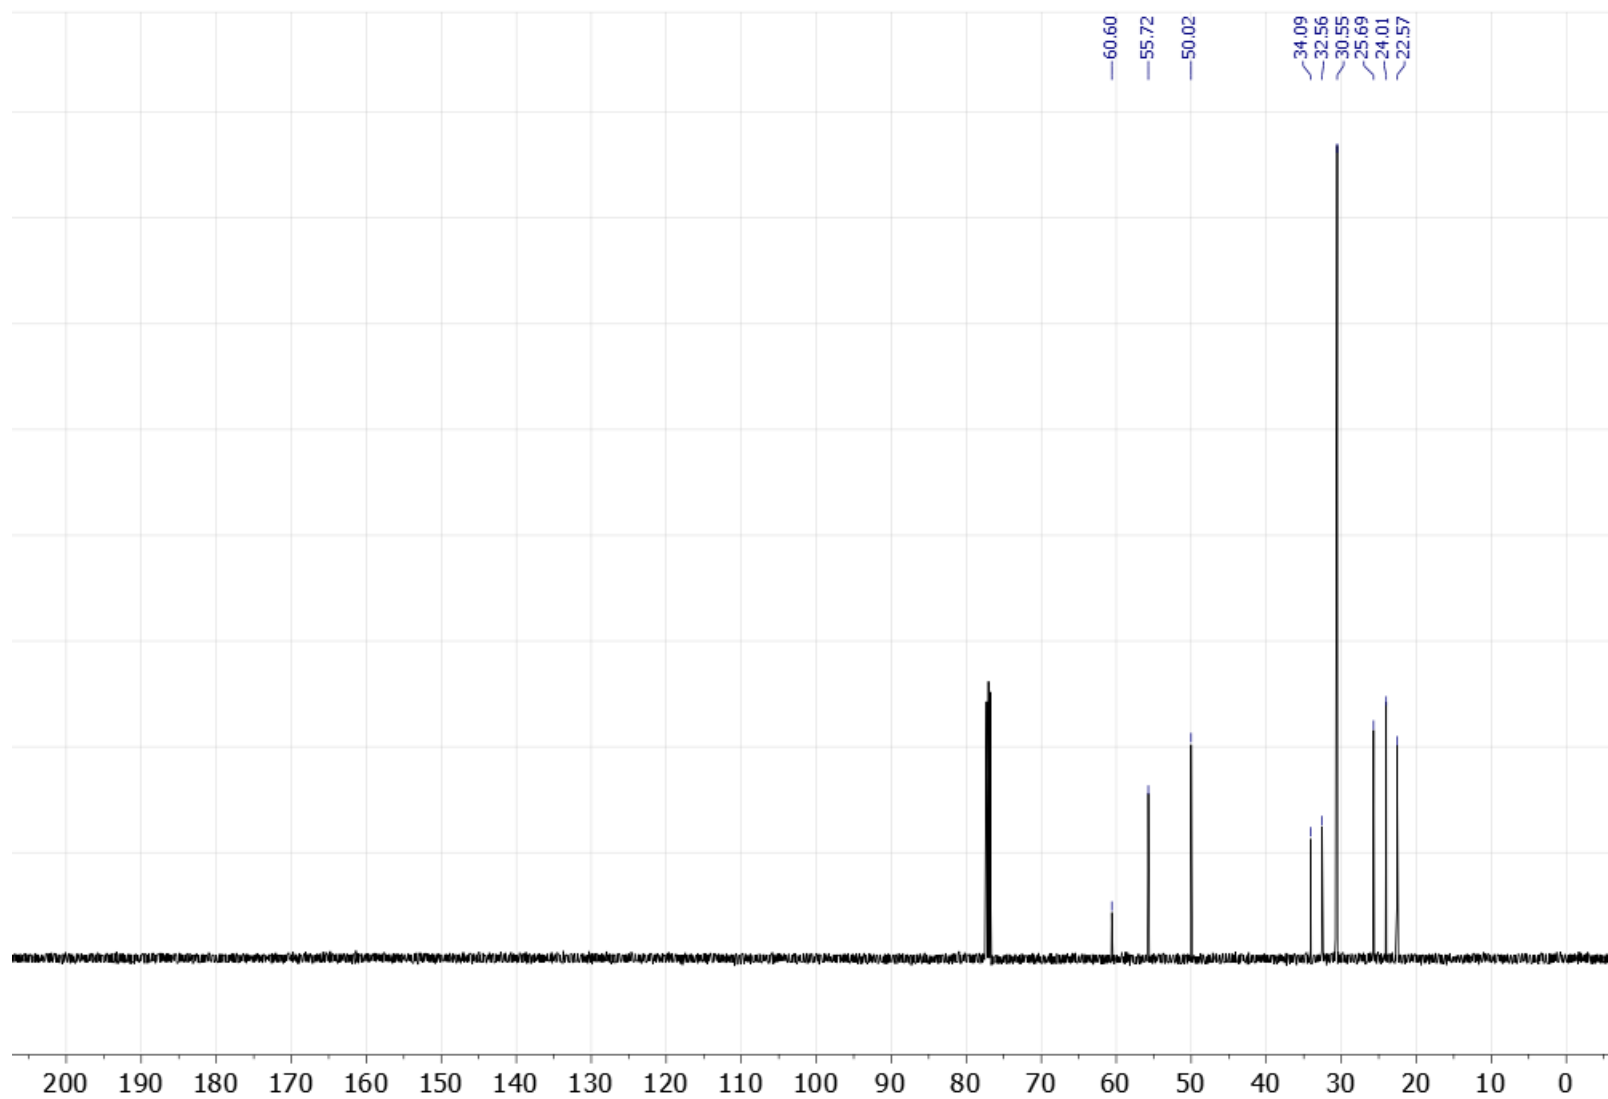

Compound **S20a**  $^1\text{H}$  NMR (500 MHz,  $\text{CDCl}_3$ )

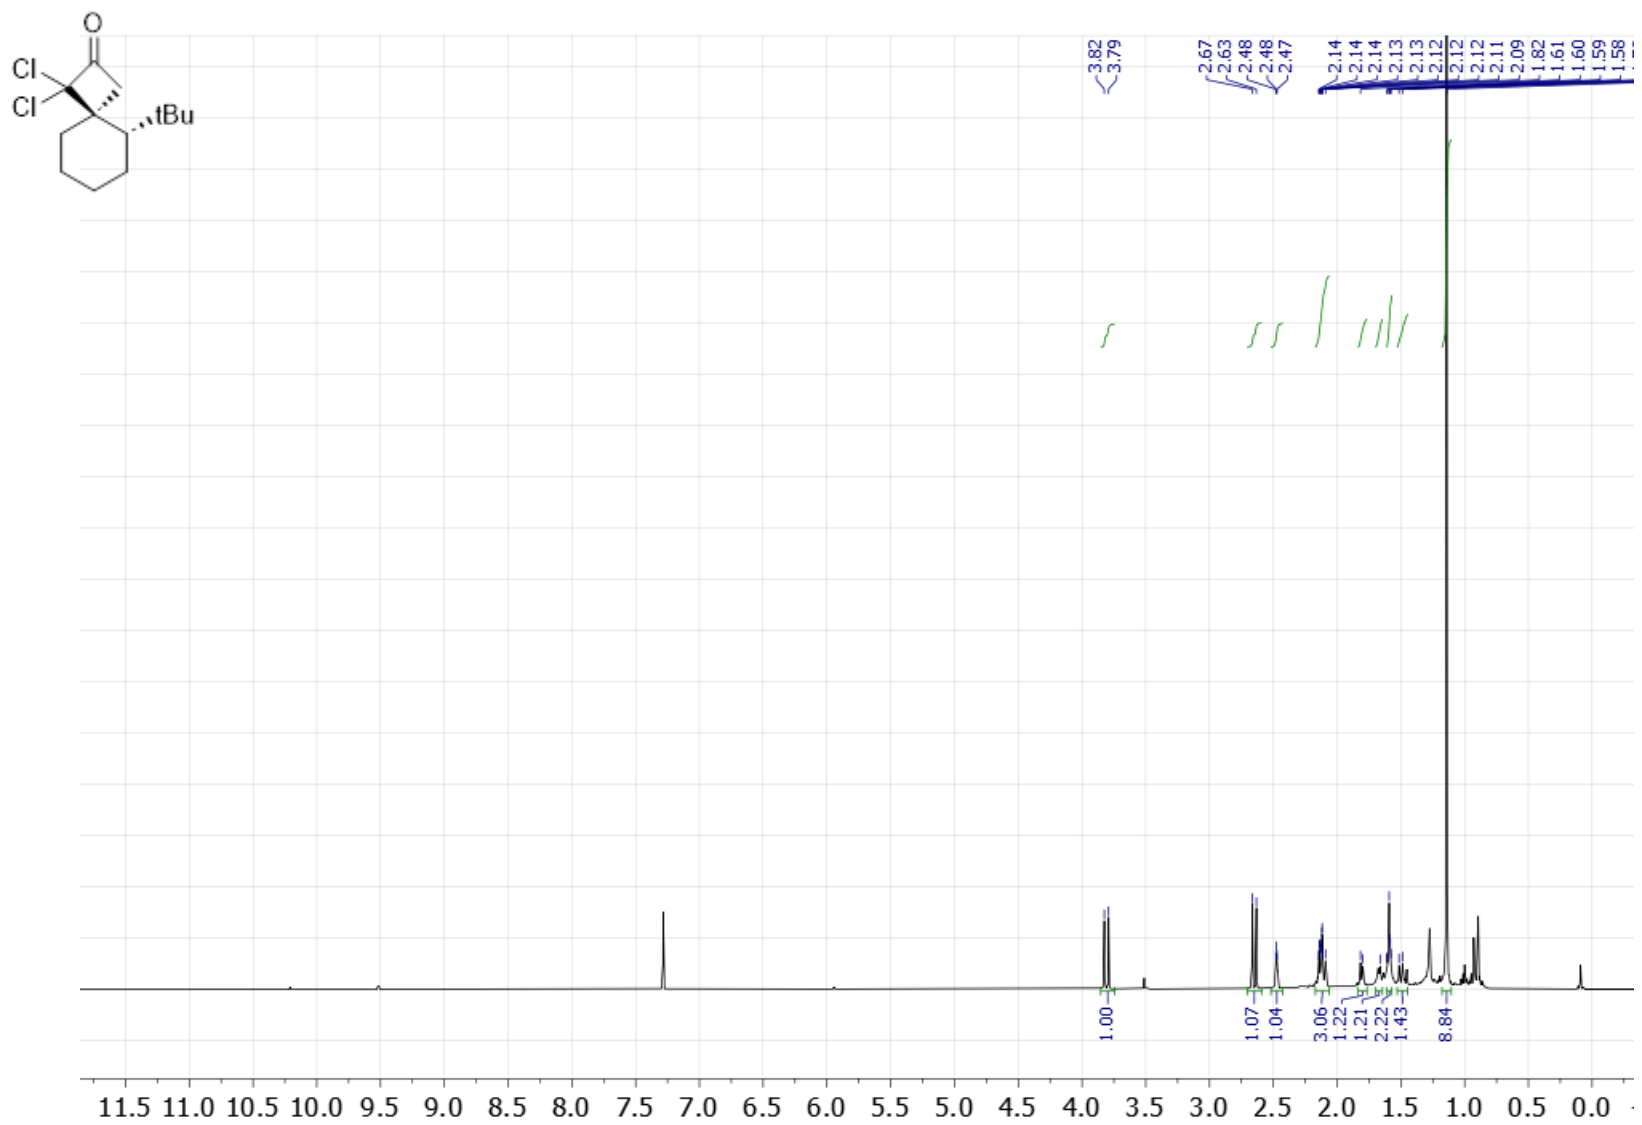

Compound **S20a**  $^{13}\text{C}$  NMR (126 MHz,  $\text{CDCl}_3$ )

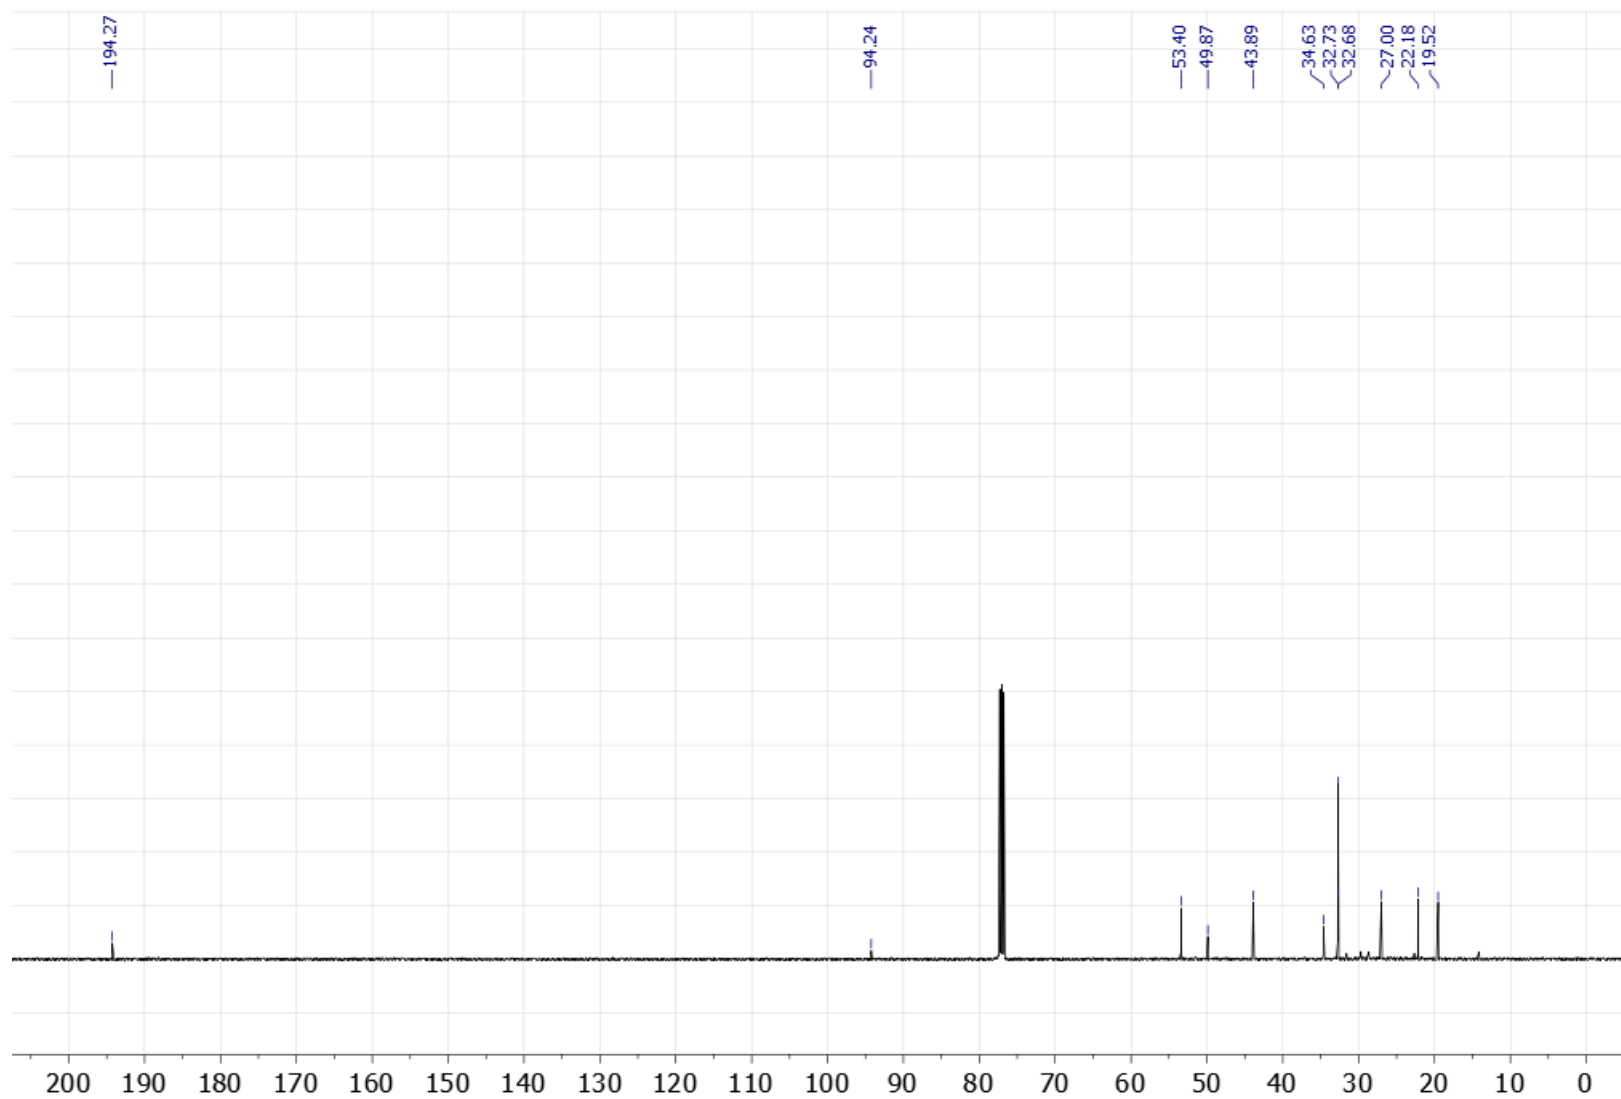

Compound **S20**  $^1\text{H}$  NMR (500 MHz,  $\text{CDCl}_3$ )

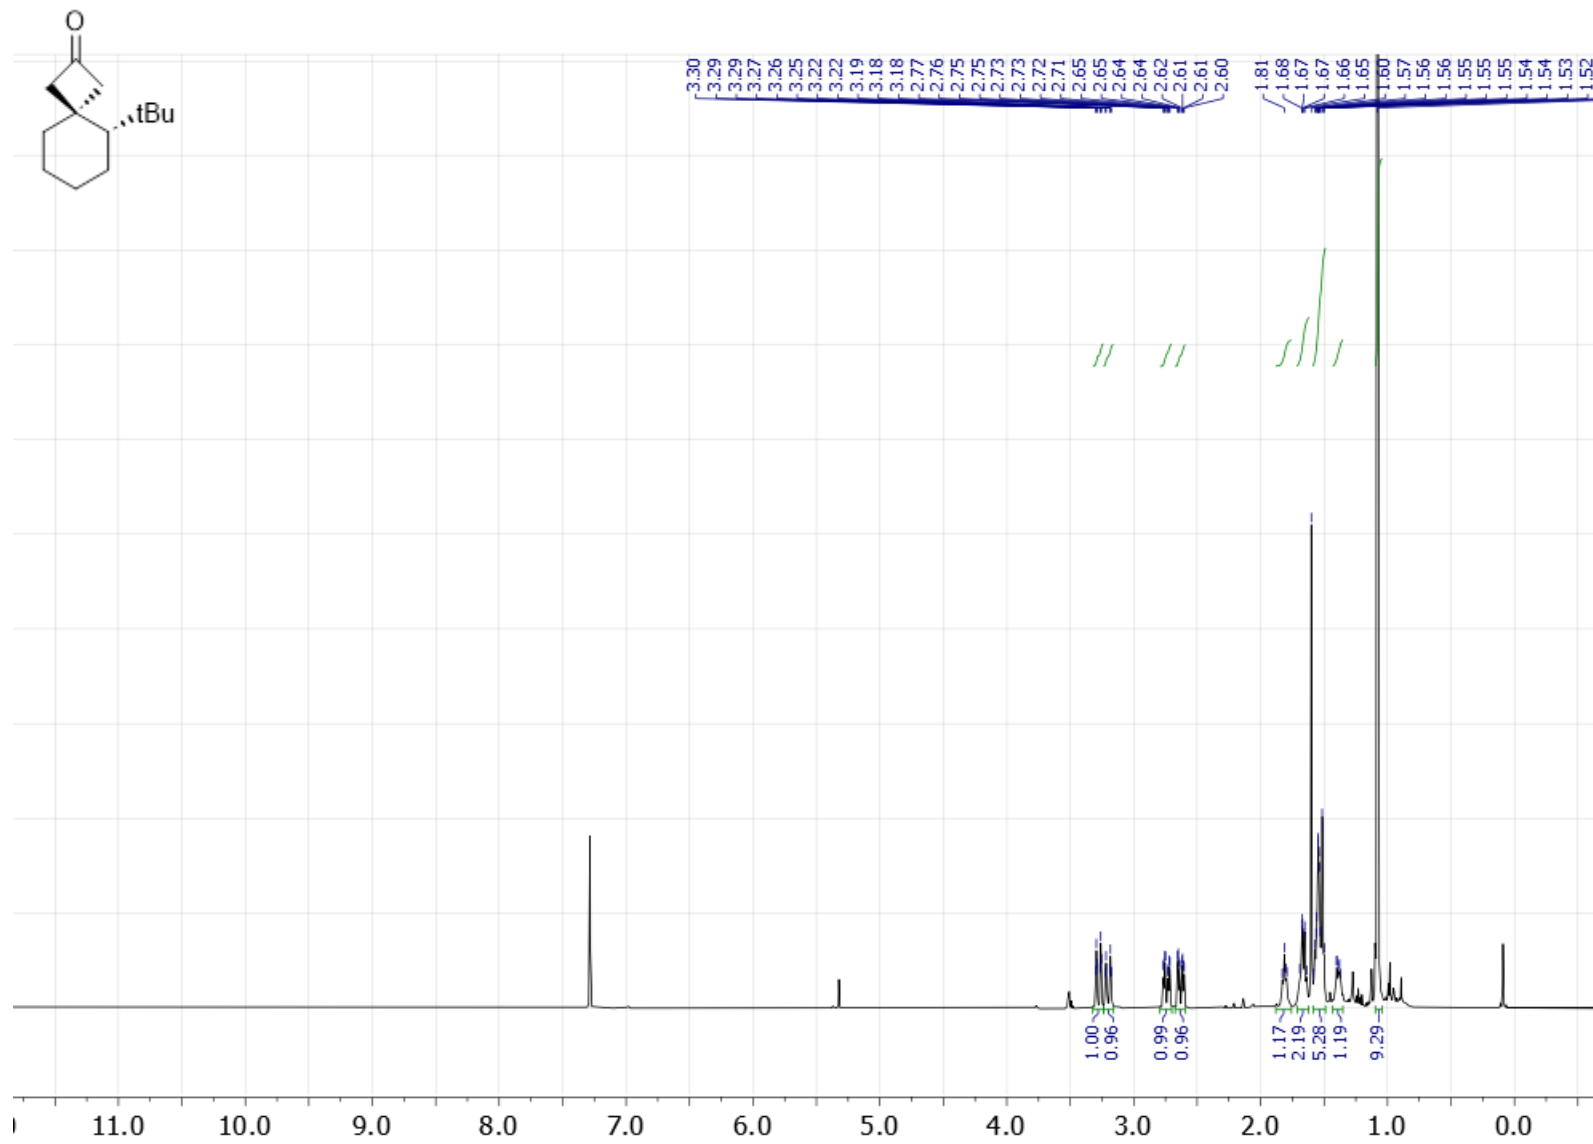

Compound **S20**  $^{13}\text{C}$  NMR (126 MHz,  $\text{CDCl}_3$ )

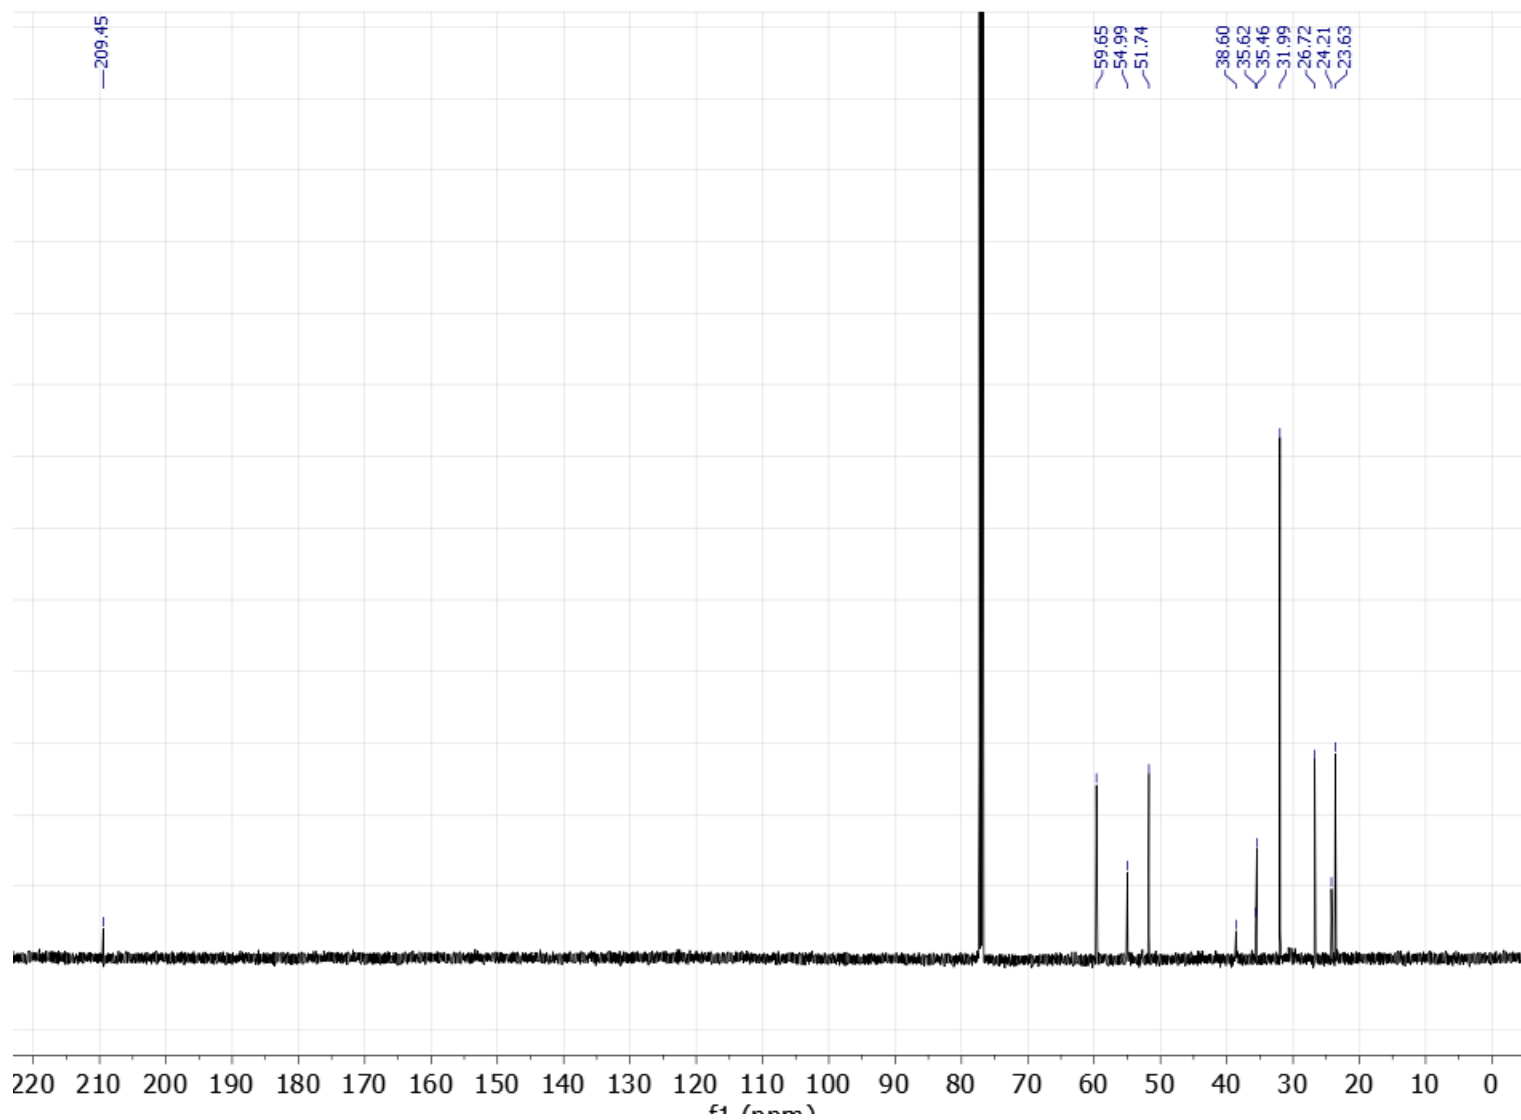



Compound **S21**  $^1\text{H}$  NMR (500 MHz,  $d_6$ -Acetone)

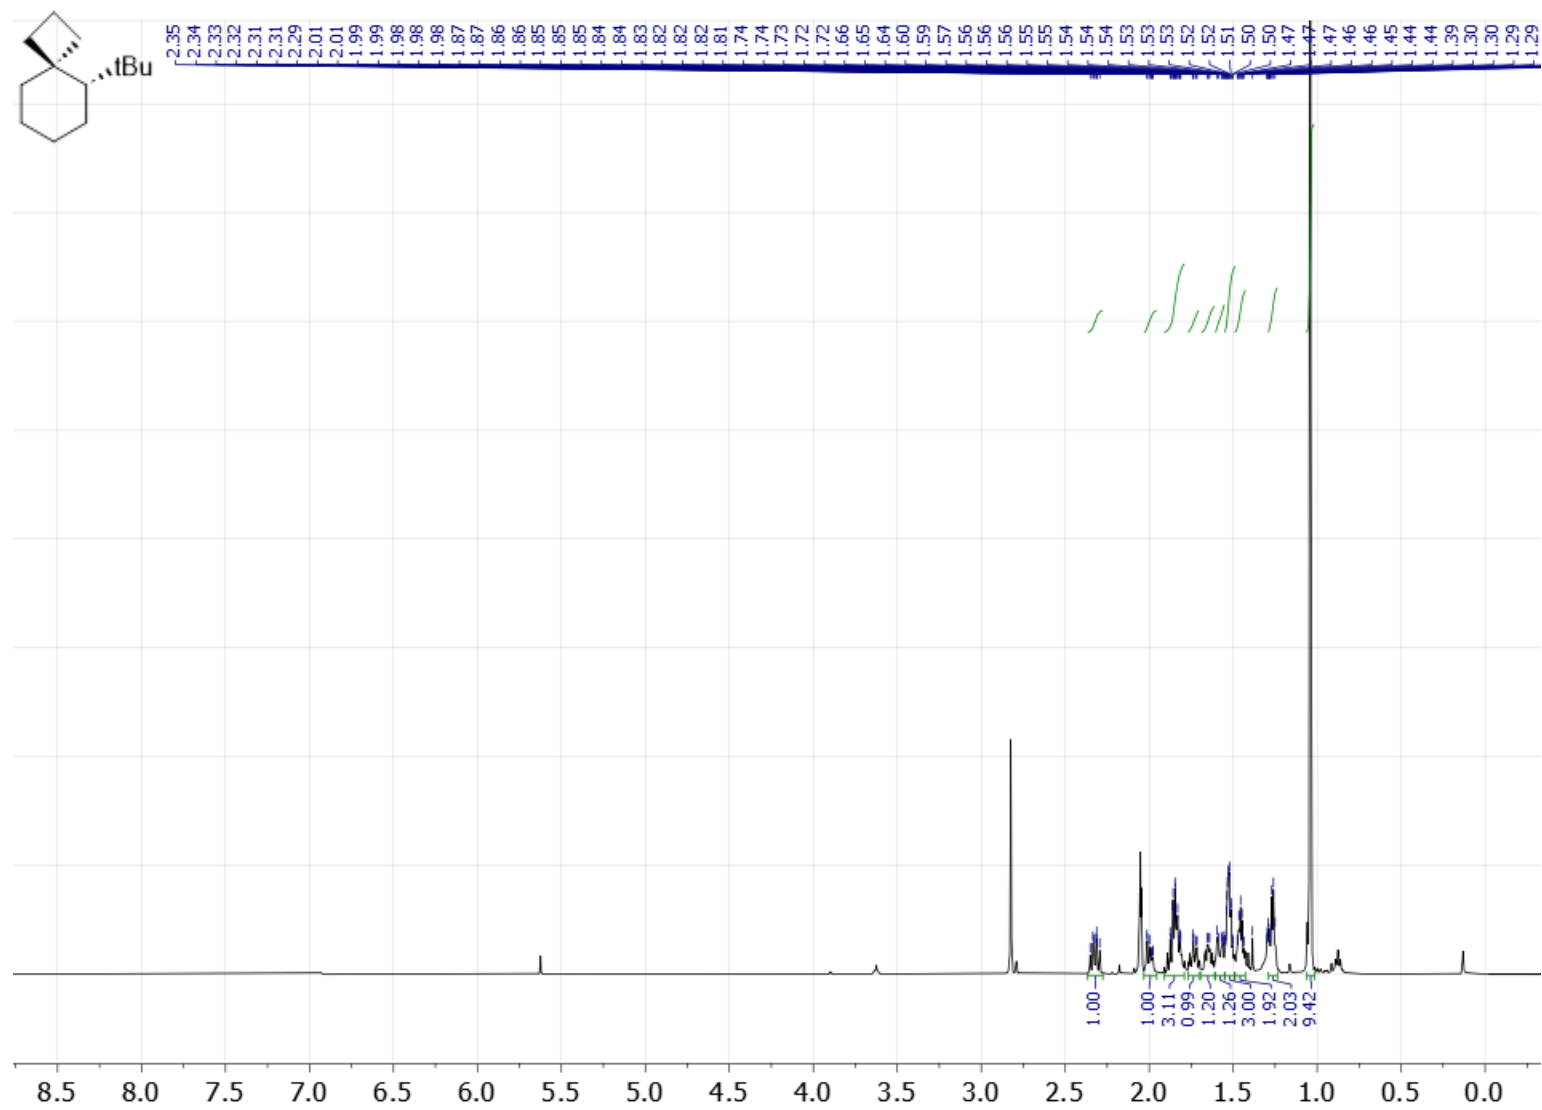

Compound **S21**  $^{13}\text{C}$  NMR (126 MHz,  $d_6$ -Acetone)

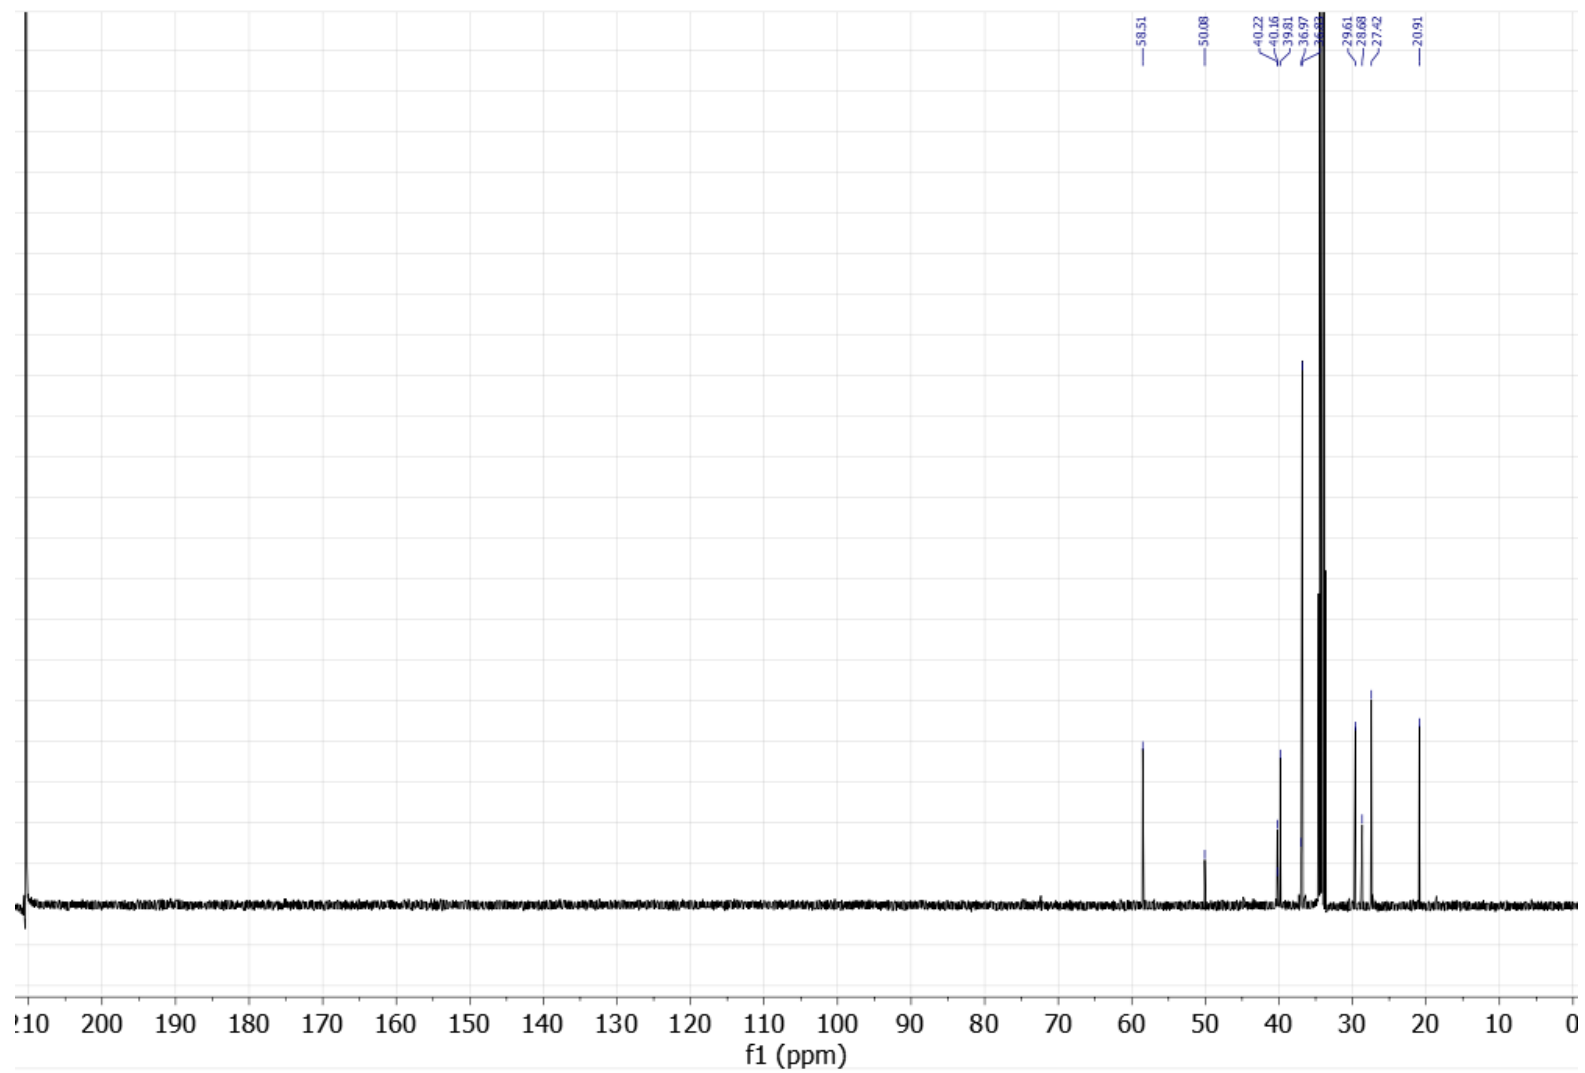

Compound **S23**-neutral  $^1\text{H}$  NMR (500 MHz,  $d_6$ -Acetone)

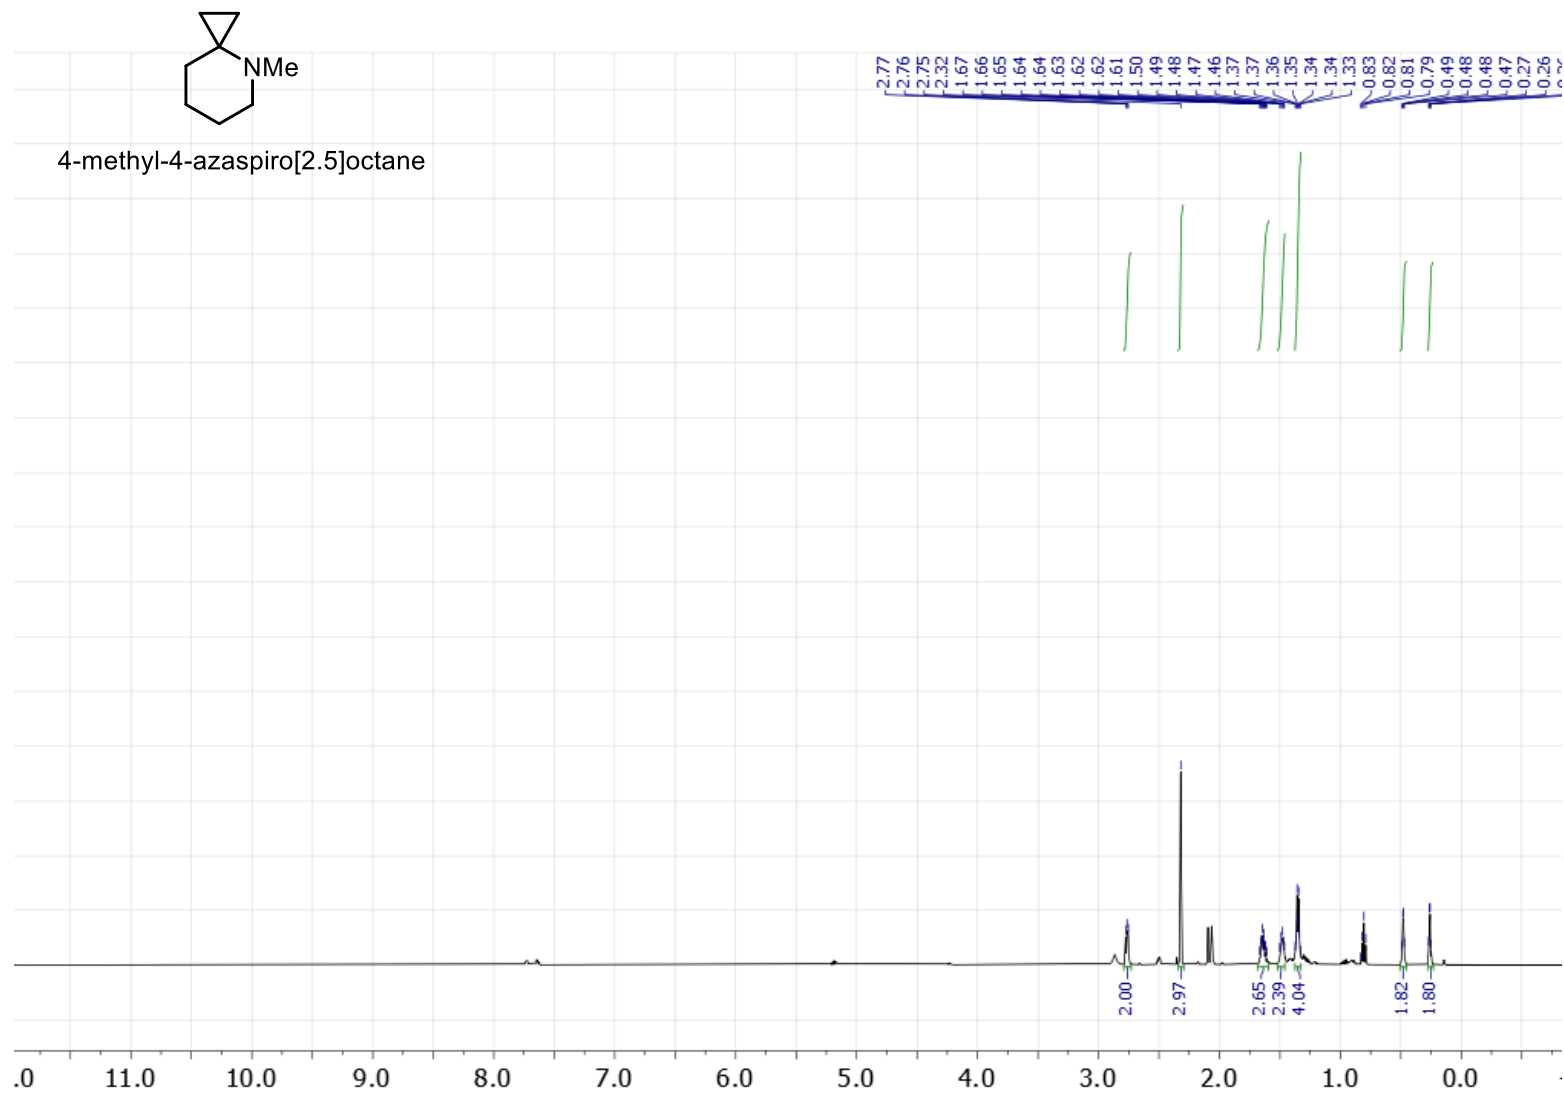

Compound **S23**-HCl  $^1\text{H}$  NMR (500 MHz,  $d_6$ -Acetone)

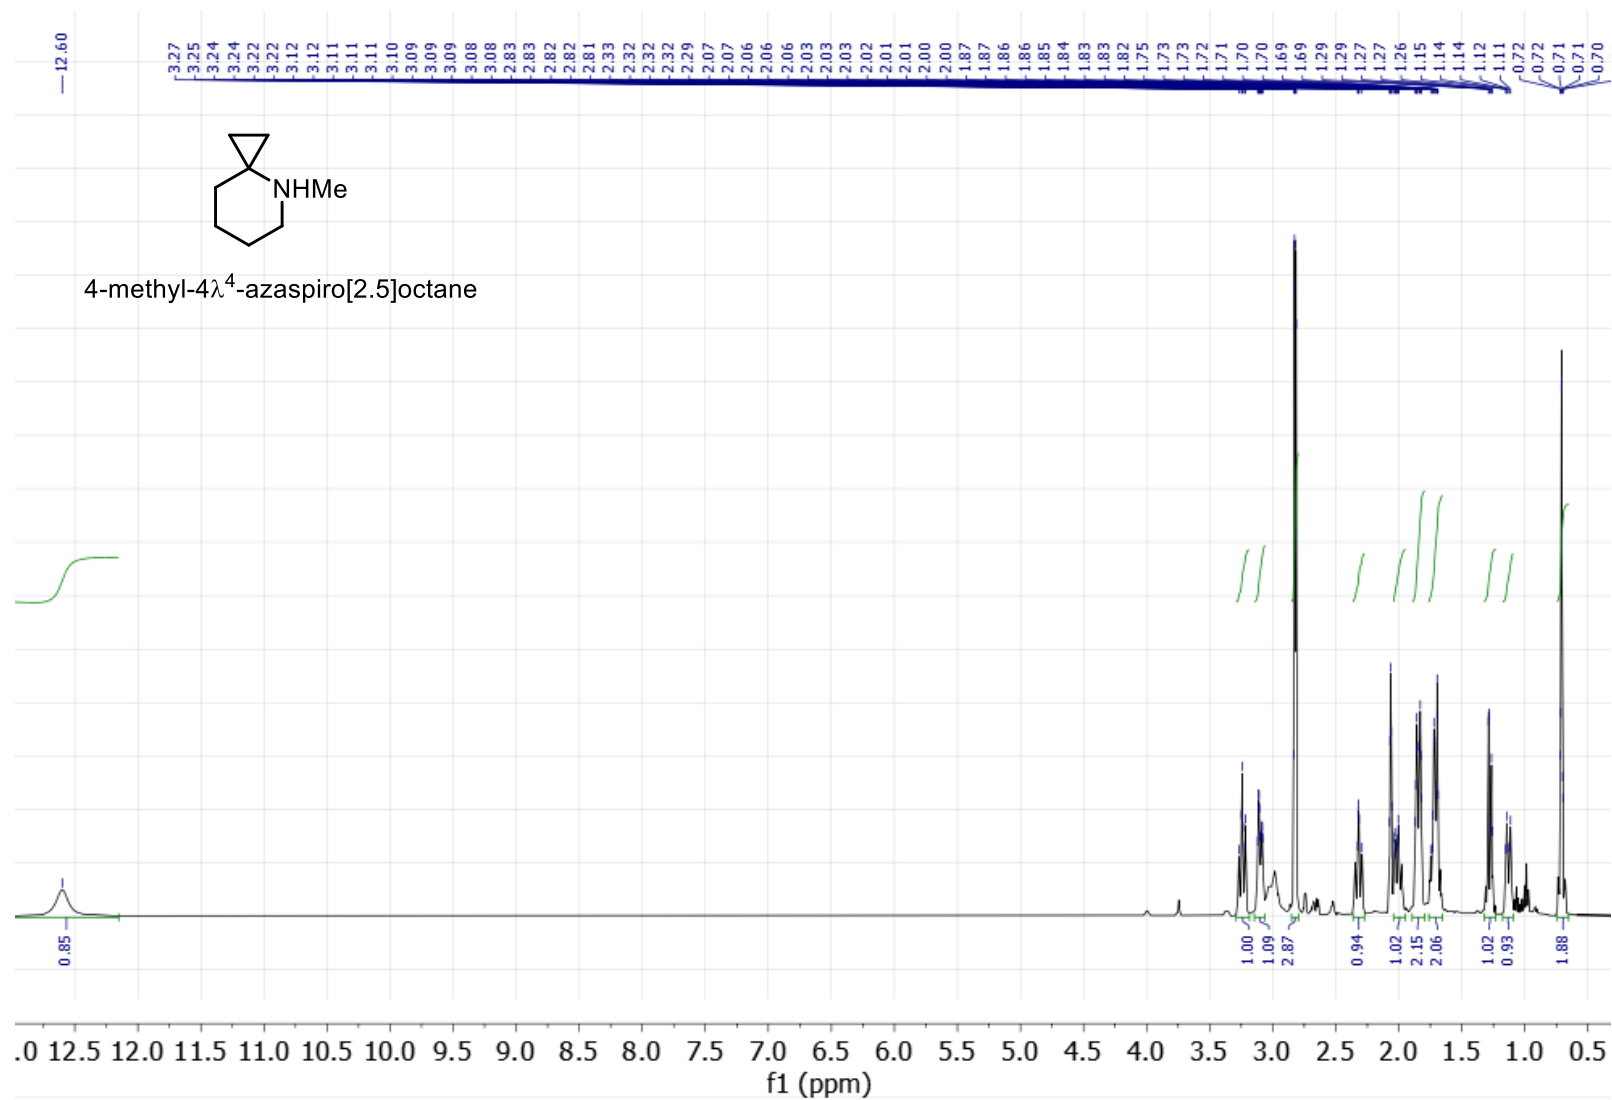

Compound **S23-HCl**  $^{13}\text{C}$  NMR (126 MHz,  $d_6$ -Acetone)

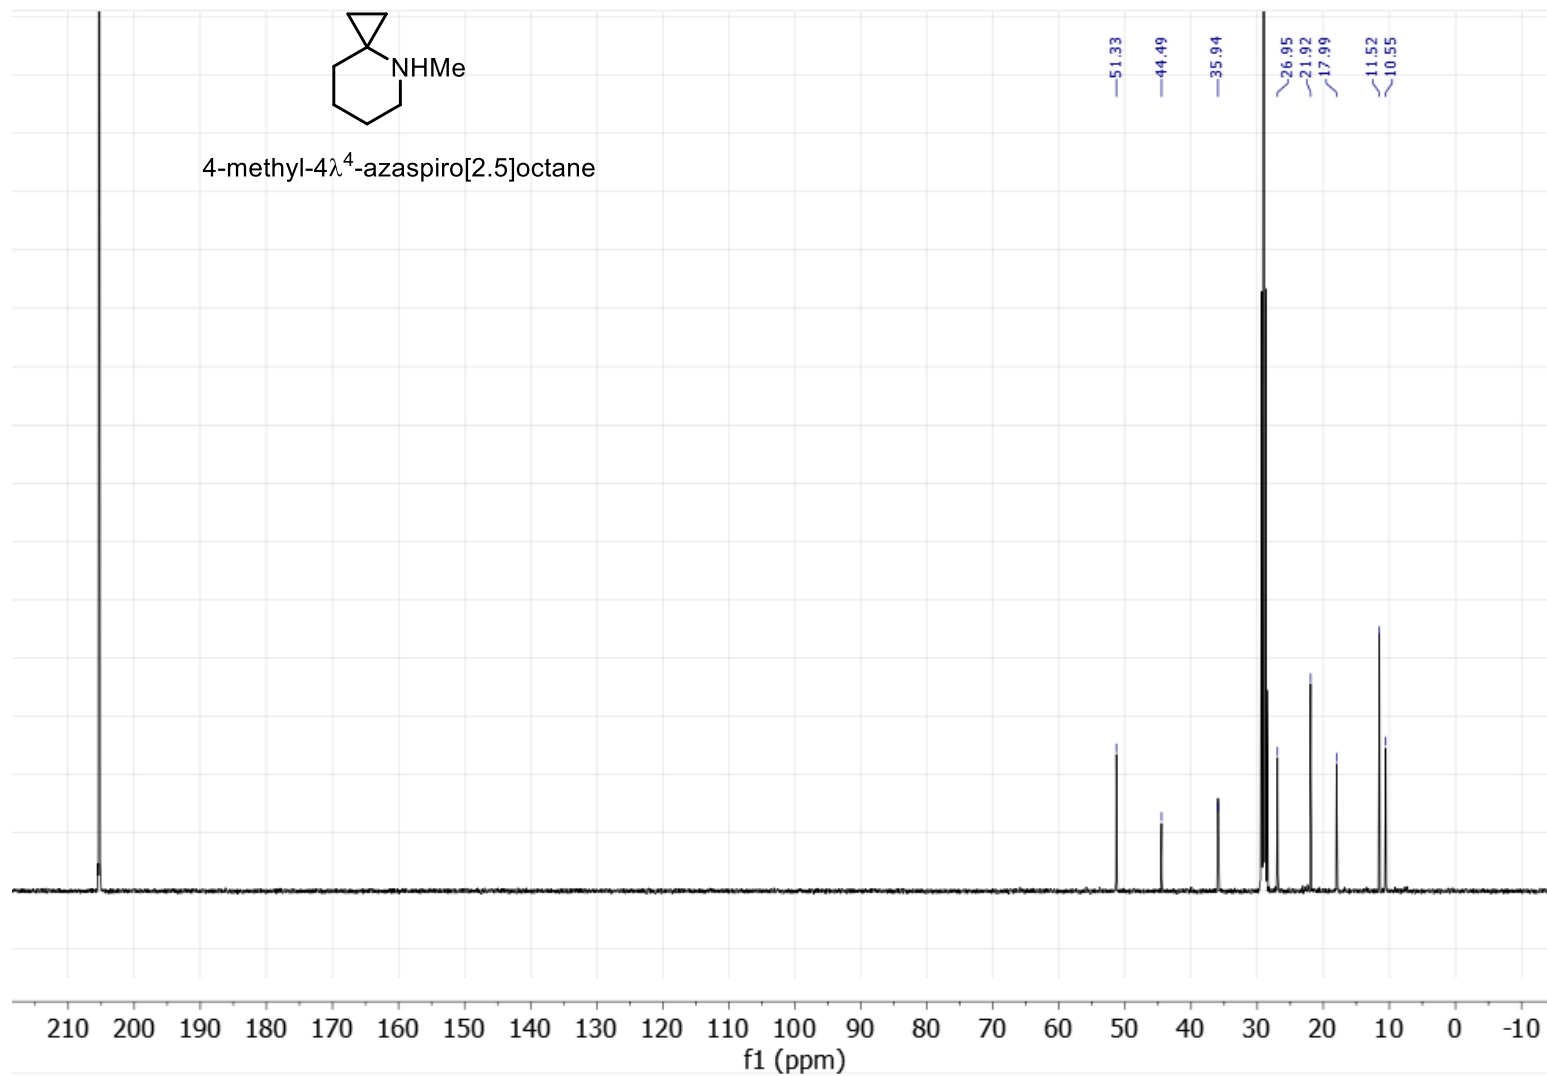

Compound **S24**  $^1\text{H}$  NMR (500 MHz,  $\text{CDCl}_3$ )

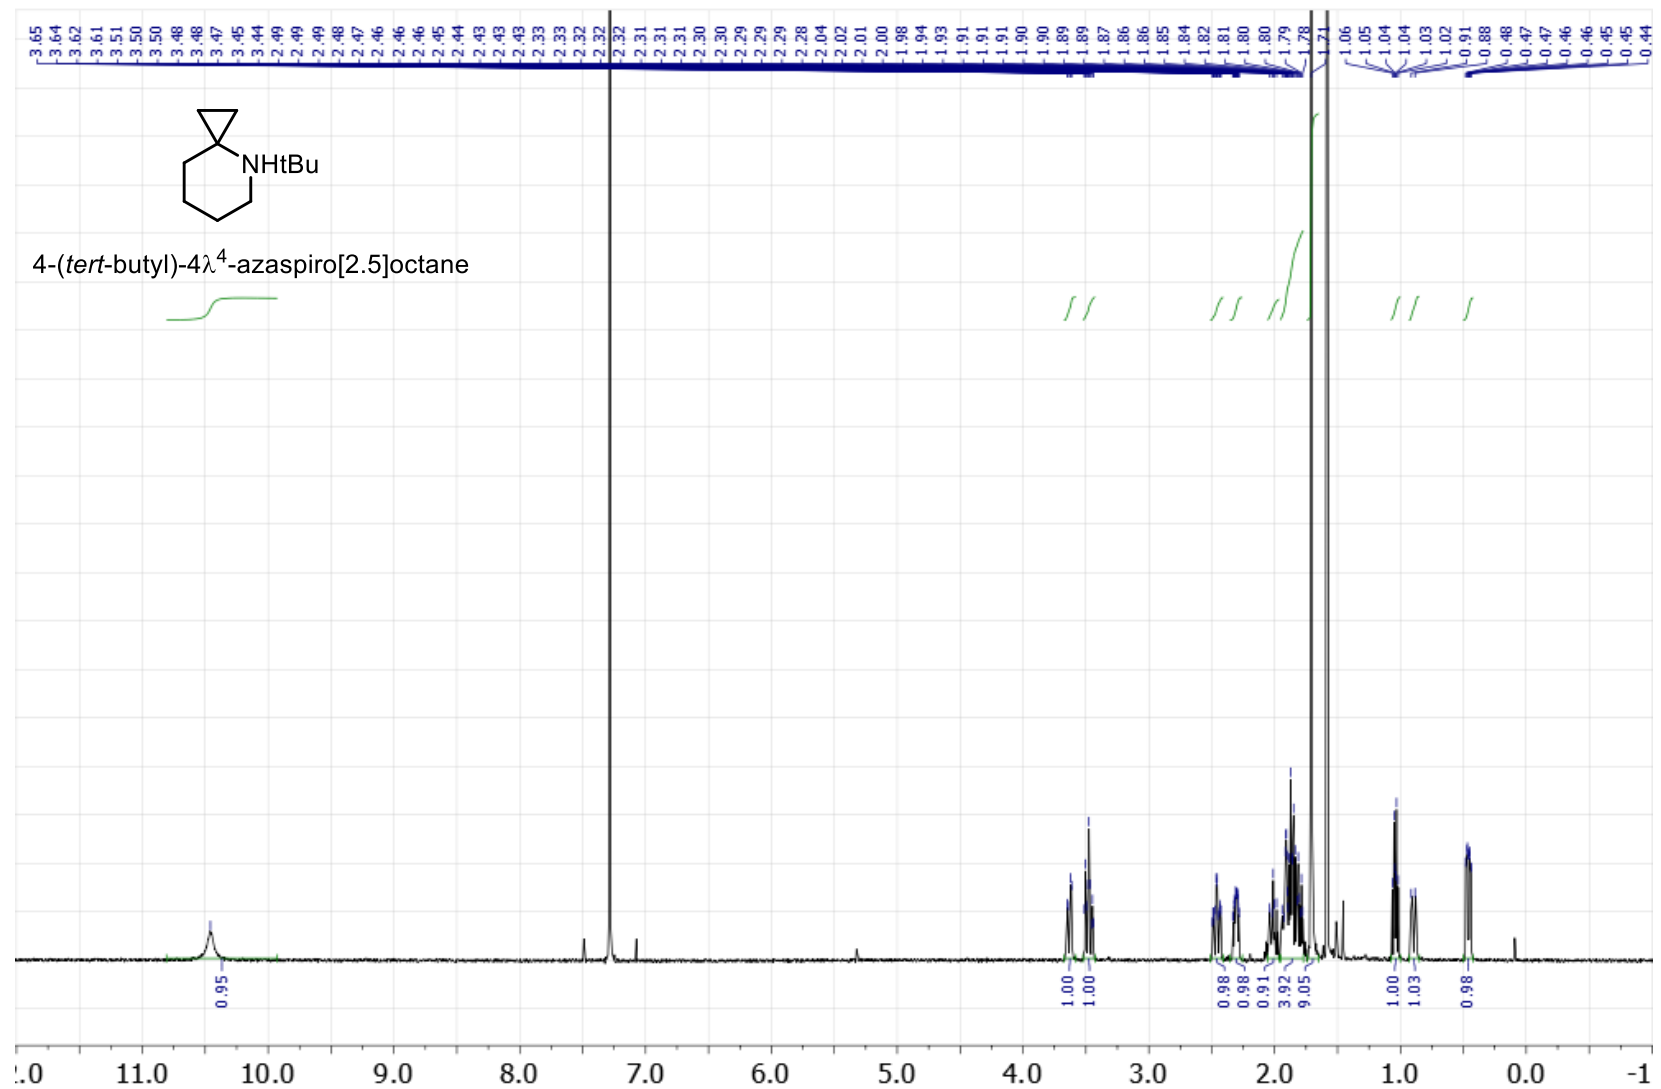

Compound S24 <sup>13</sup>C NMR (126 MHz, CDCl<sub>3</sub>)

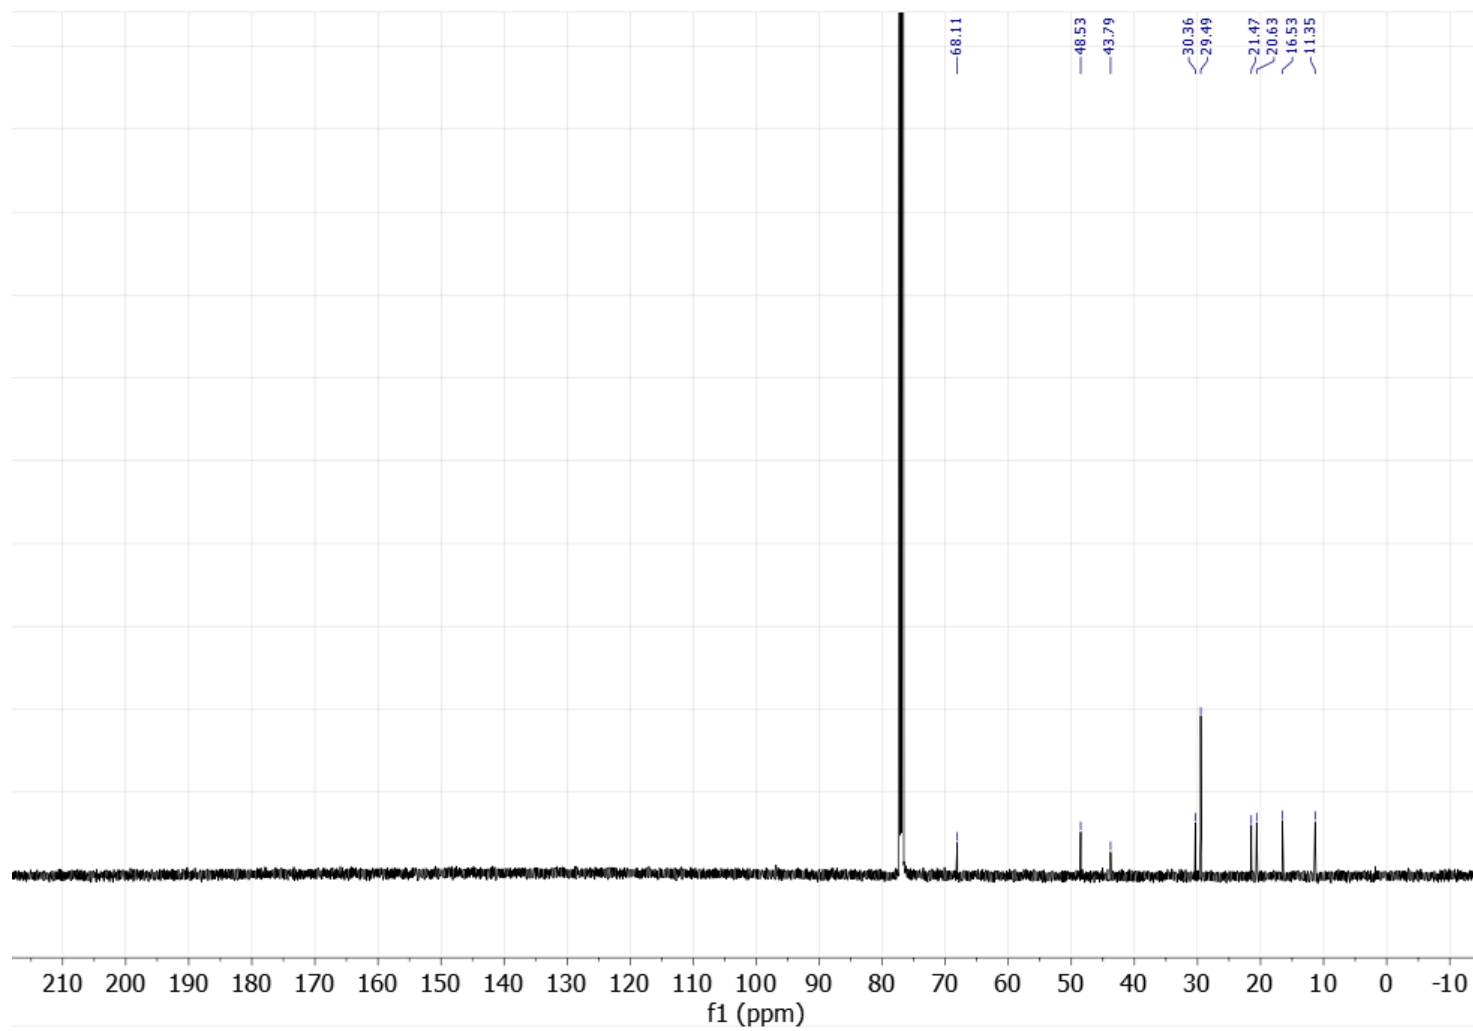

Compound S24 HSQC (CDCl<sub>3</sub>)

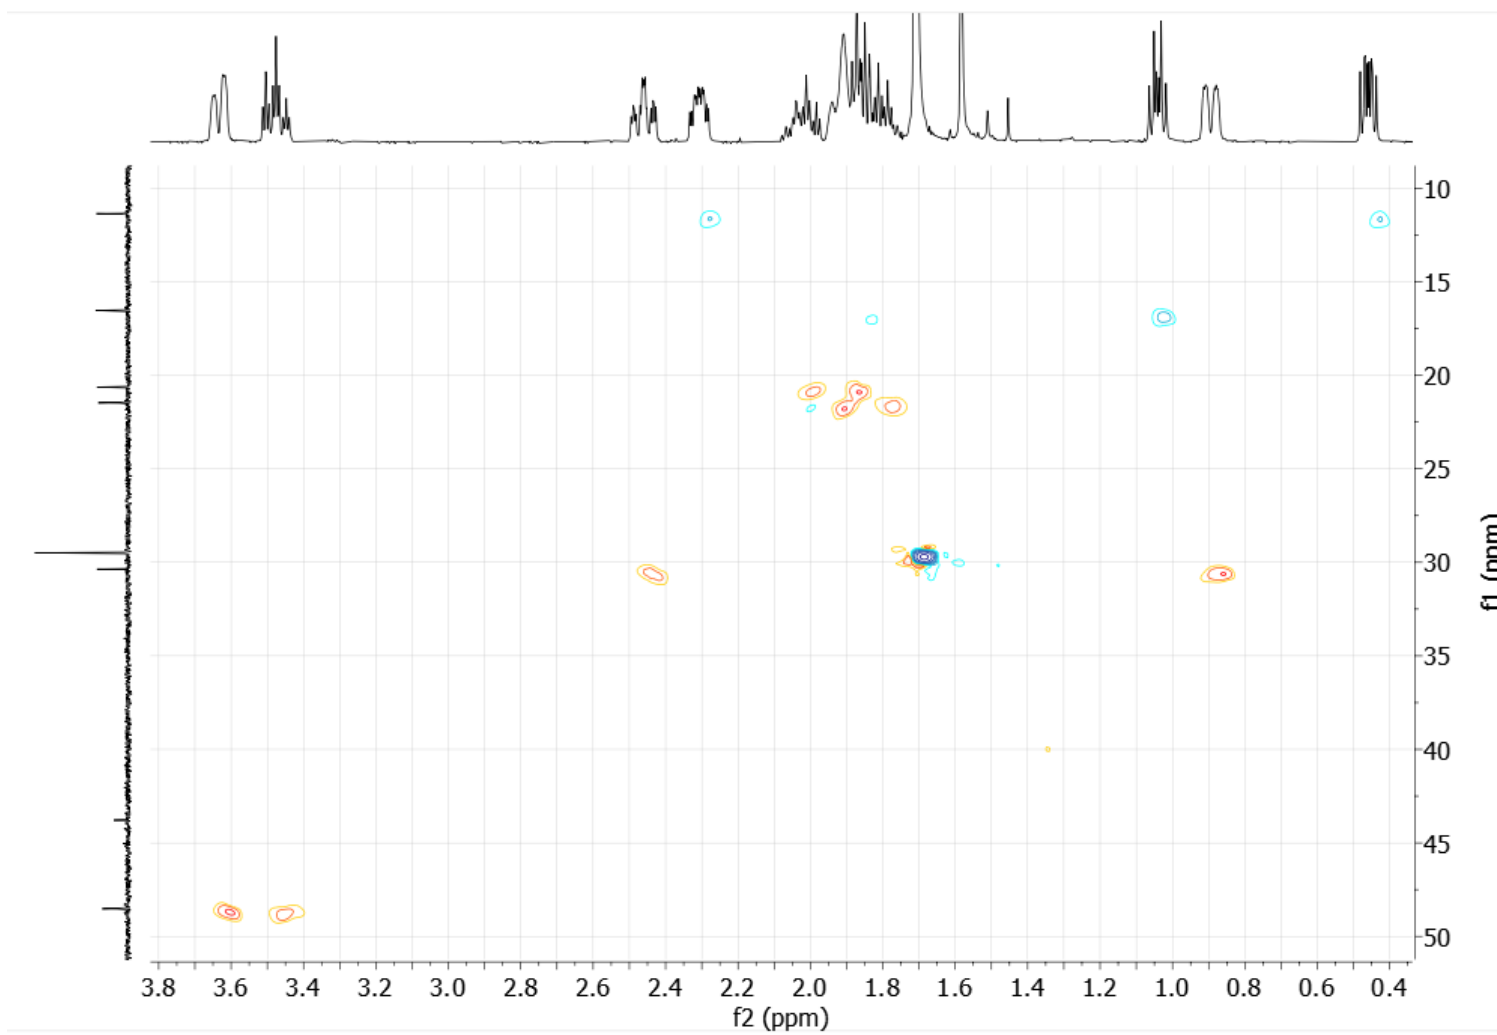



Compound **S24 1D** NOE (irradiation at 2.45 ppm, axial proton adjacent to cyclopropane)

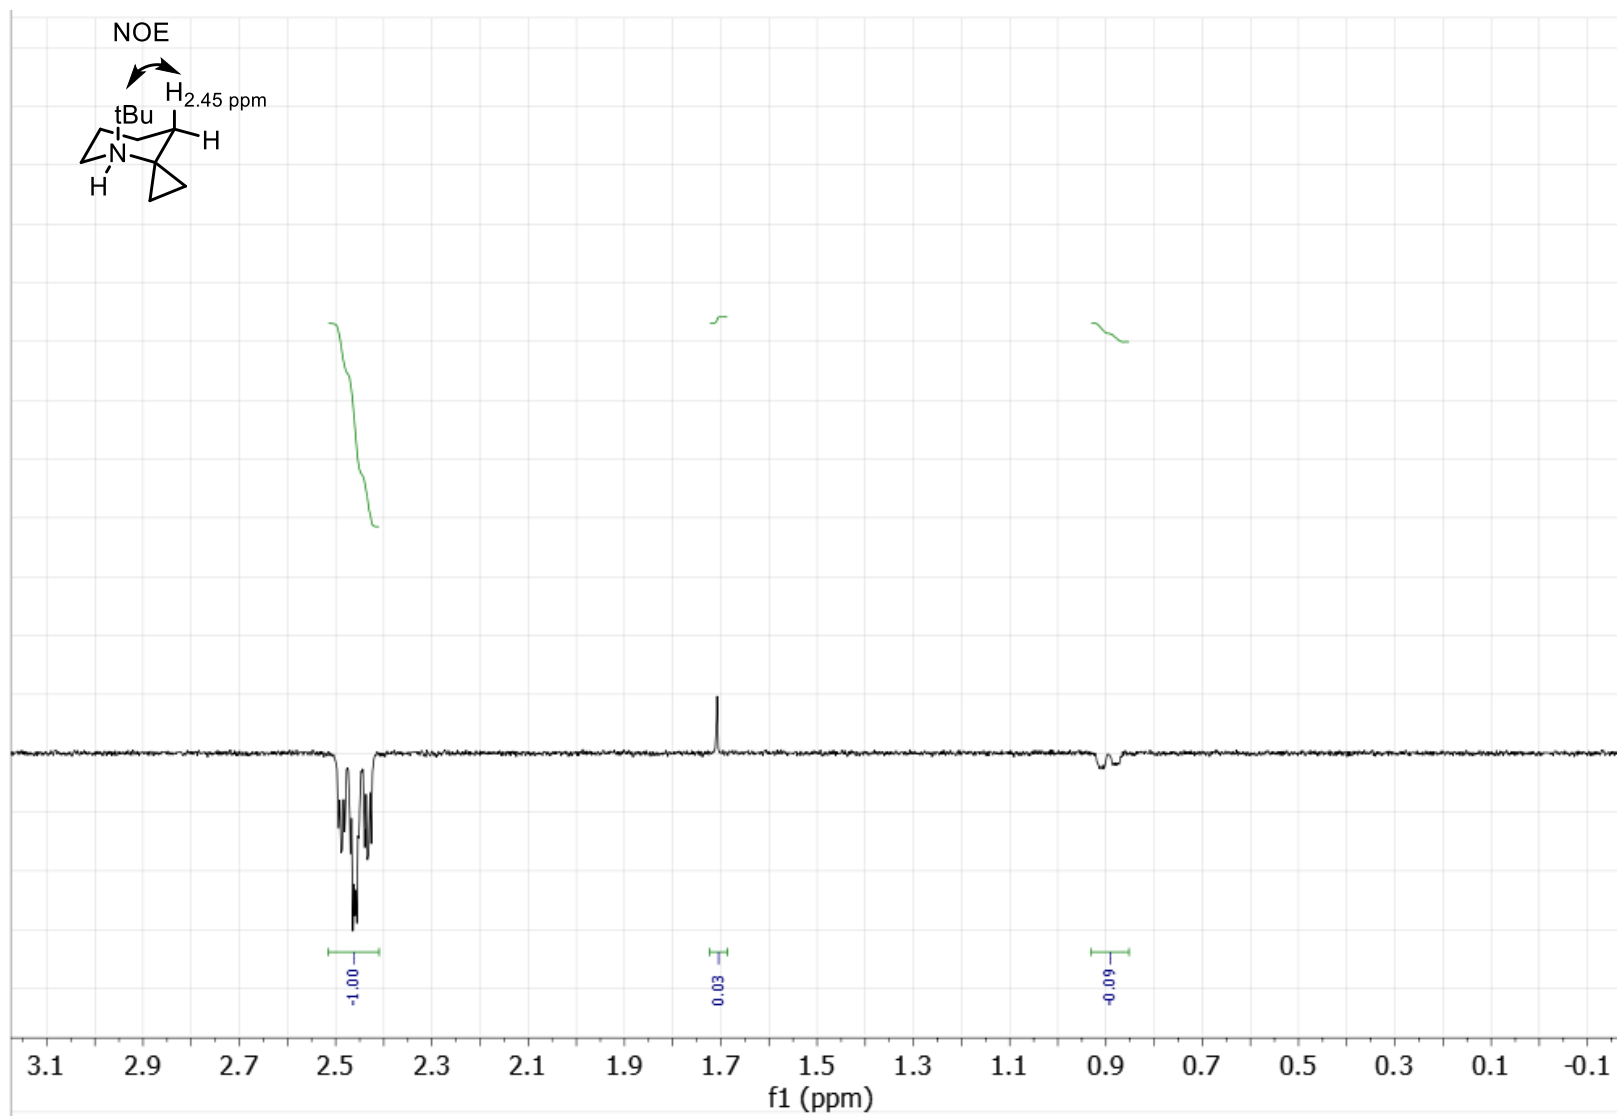

Compound **S25**  $^1\text{H}$  NMR (500 MHz,  $\text{CDCl}_3$ )

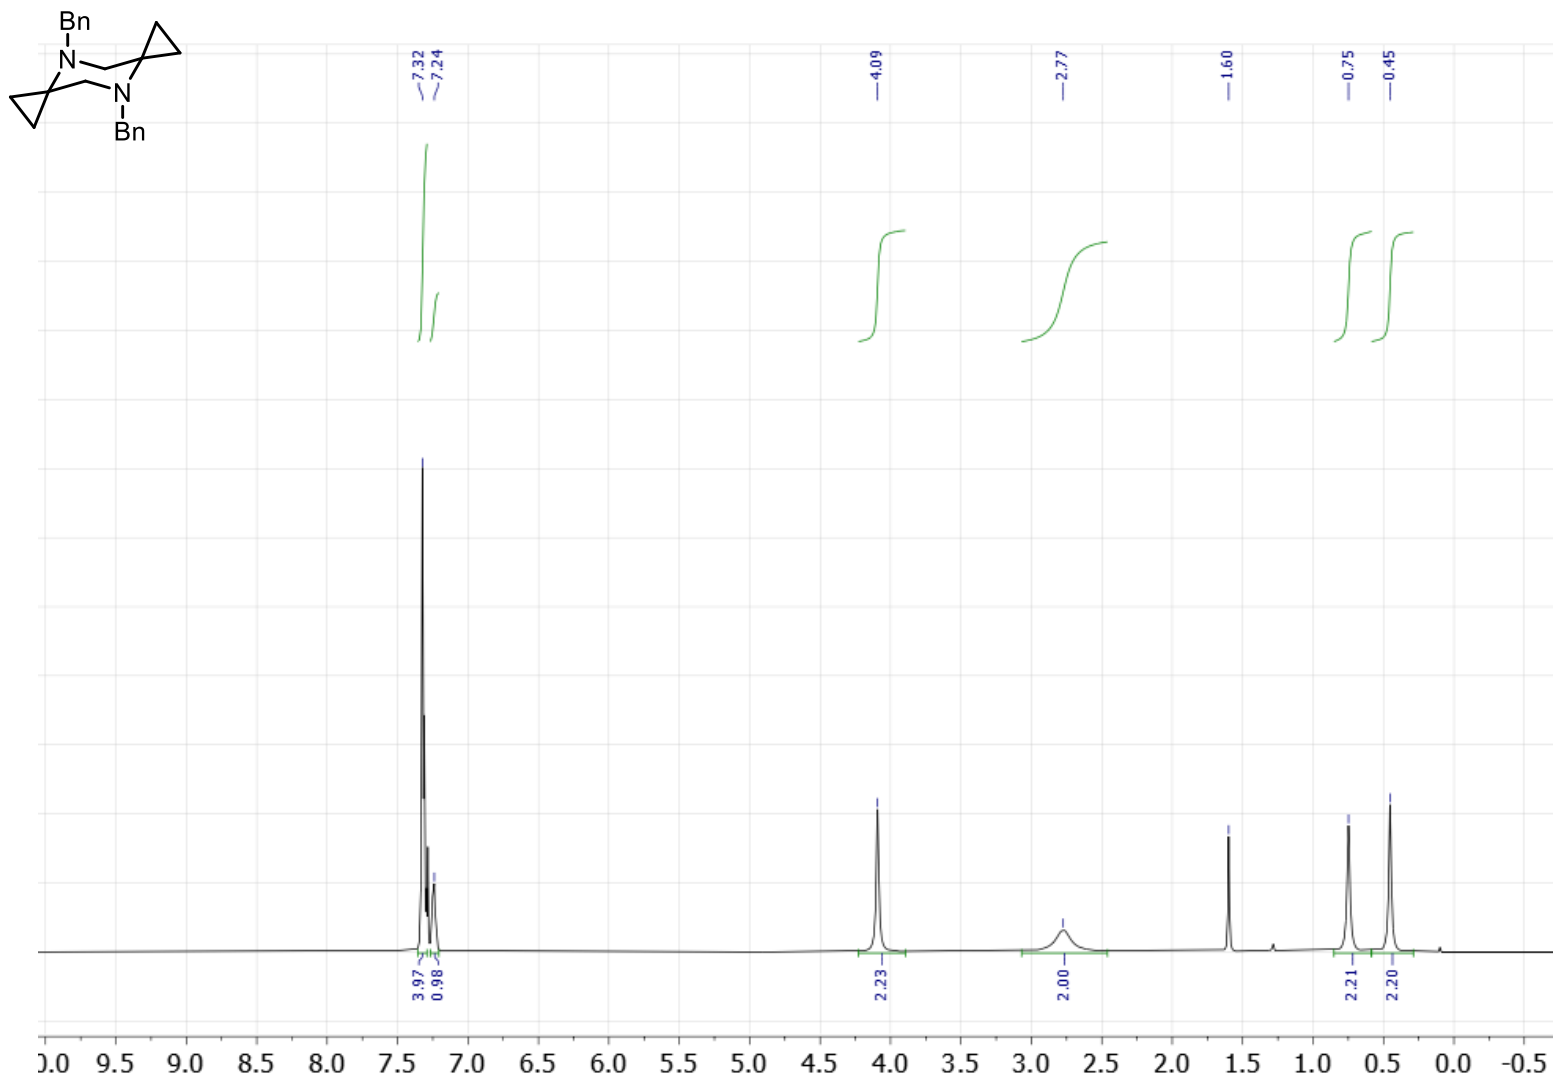

Compound **S25**  $^{13}\text{C}$  NMR (126 MHz,  $\text{CDCl}_3$ ) with zoom of broad peak at 12.35 ppm

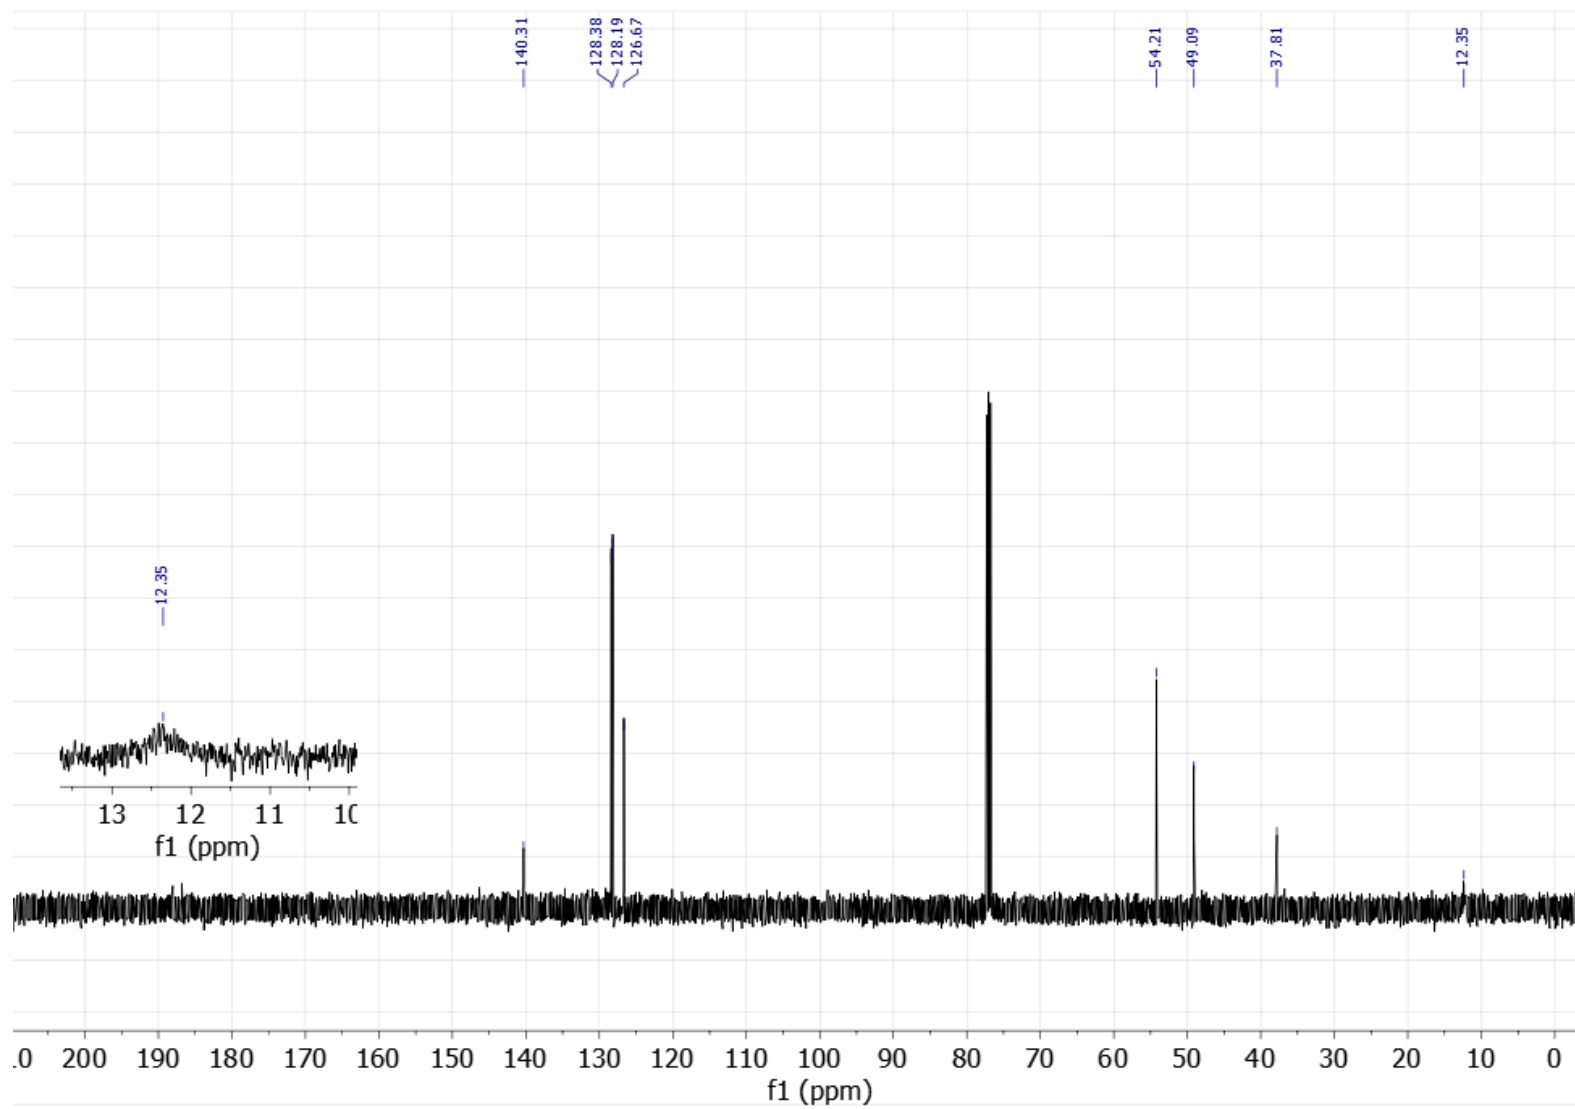

Compound **S26**  $^1\text{H}$  NMR (500 MHz,  $\text{CDCl}_3$ )

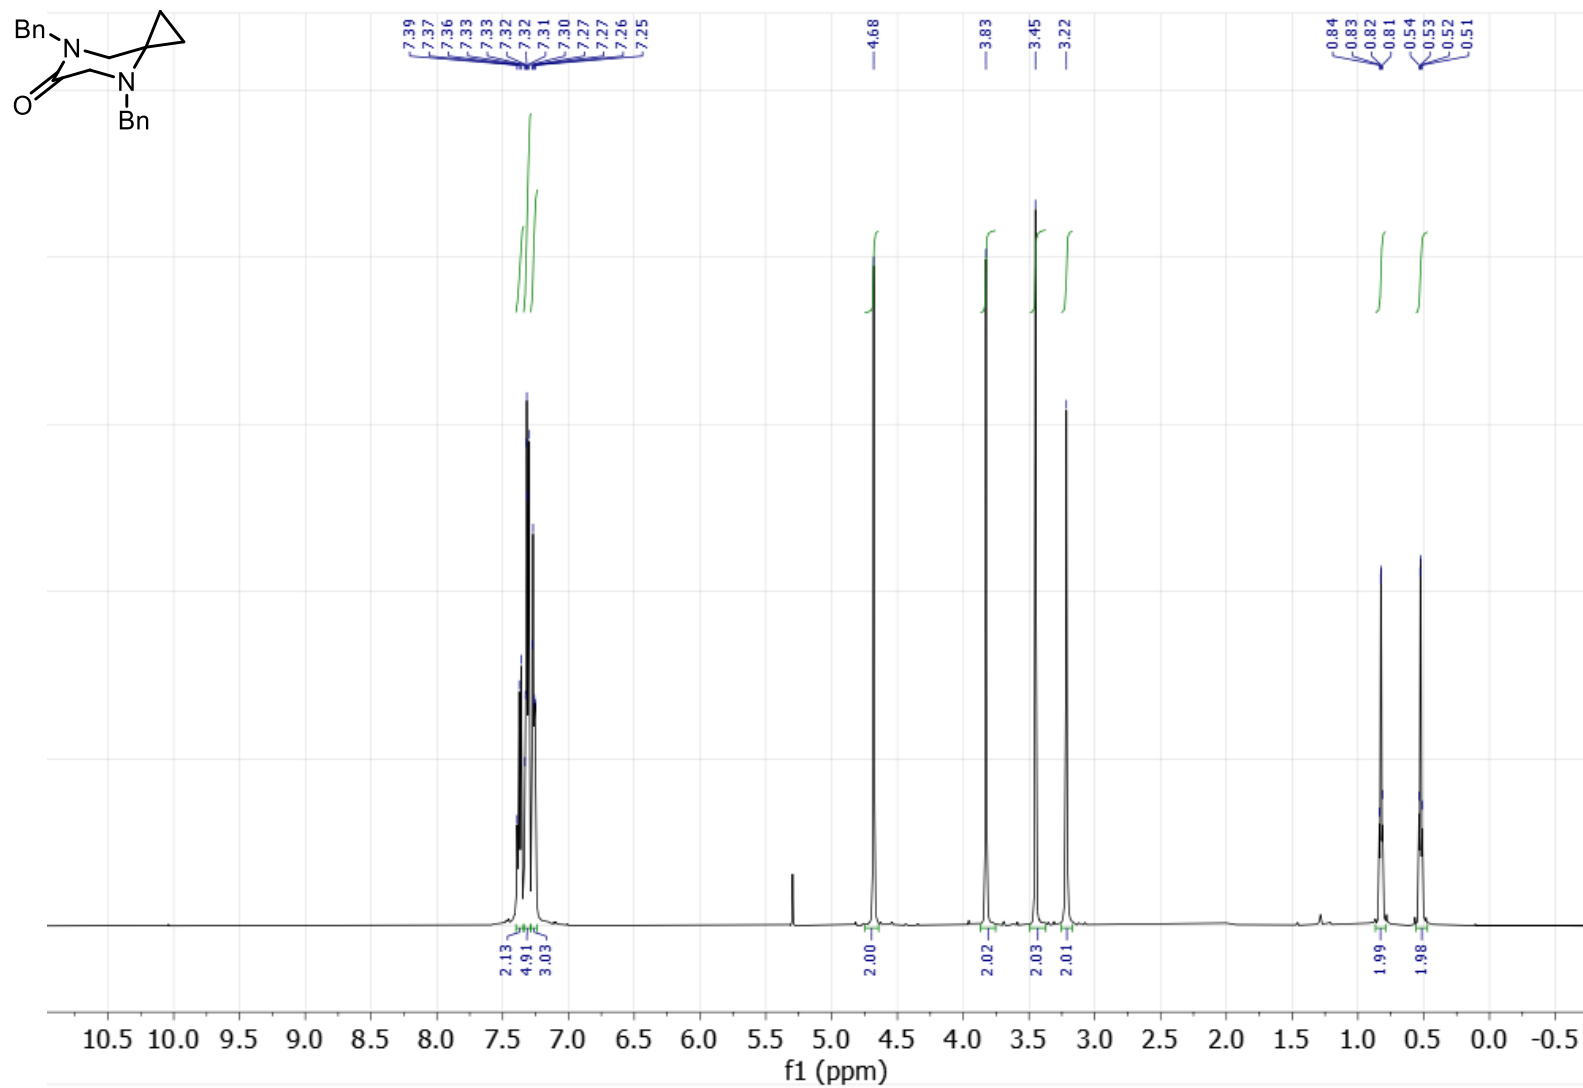

Compound S26 <sup>13</sup>C NMR (126 MHz, CDCl<sub>3</sub>)

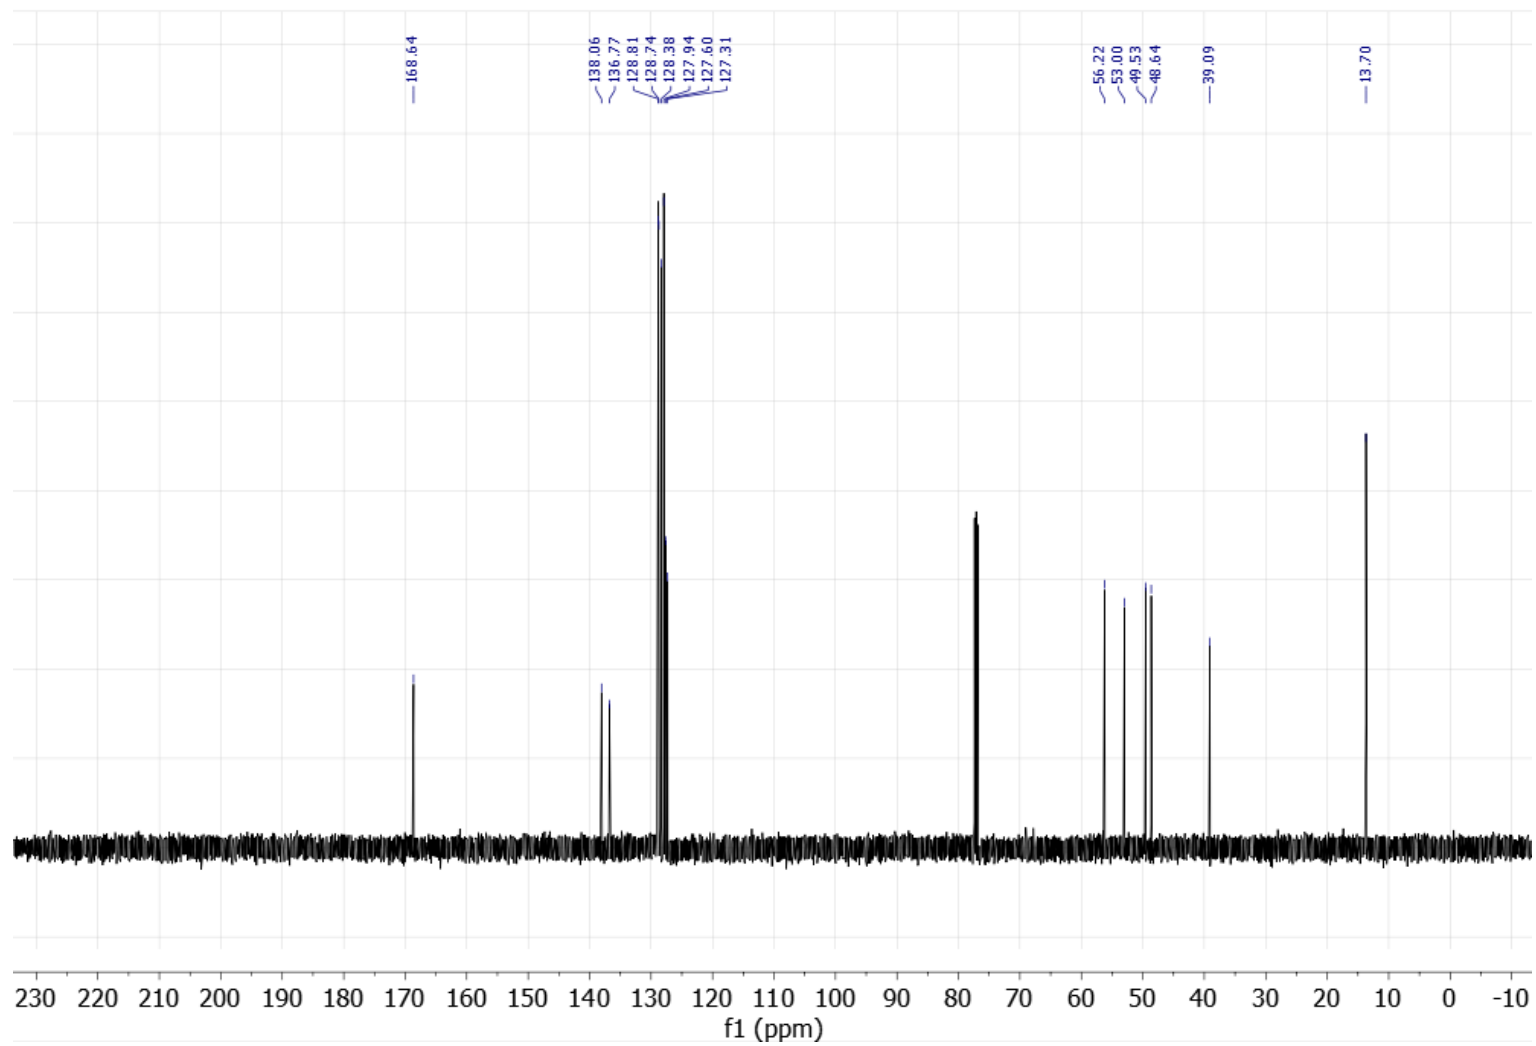

Compound S27  $^1\text{H}$  NMR (500 MHz,  $\text{CDCl}_3$ )

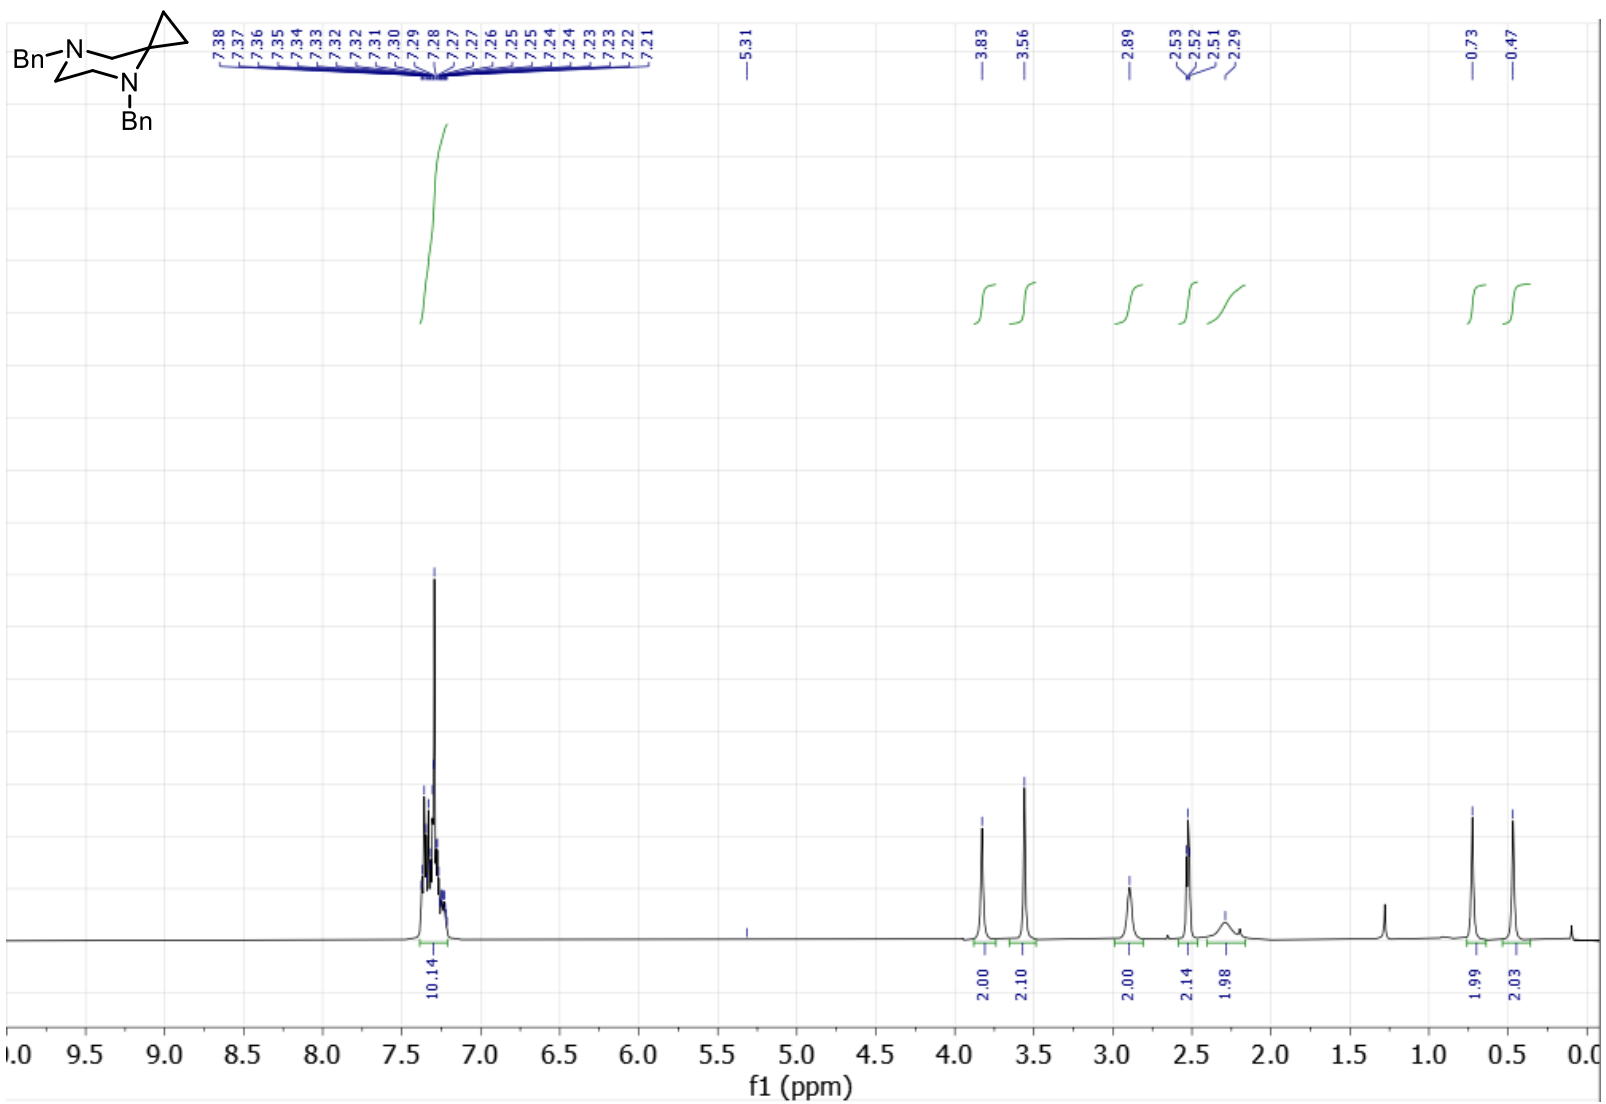

Compound S27  $^{13}\text{C}$  NMR (126 MHz,  $\text{CDCl}_3$ ) with zoom of slightly broad peak at 8.27 ppm

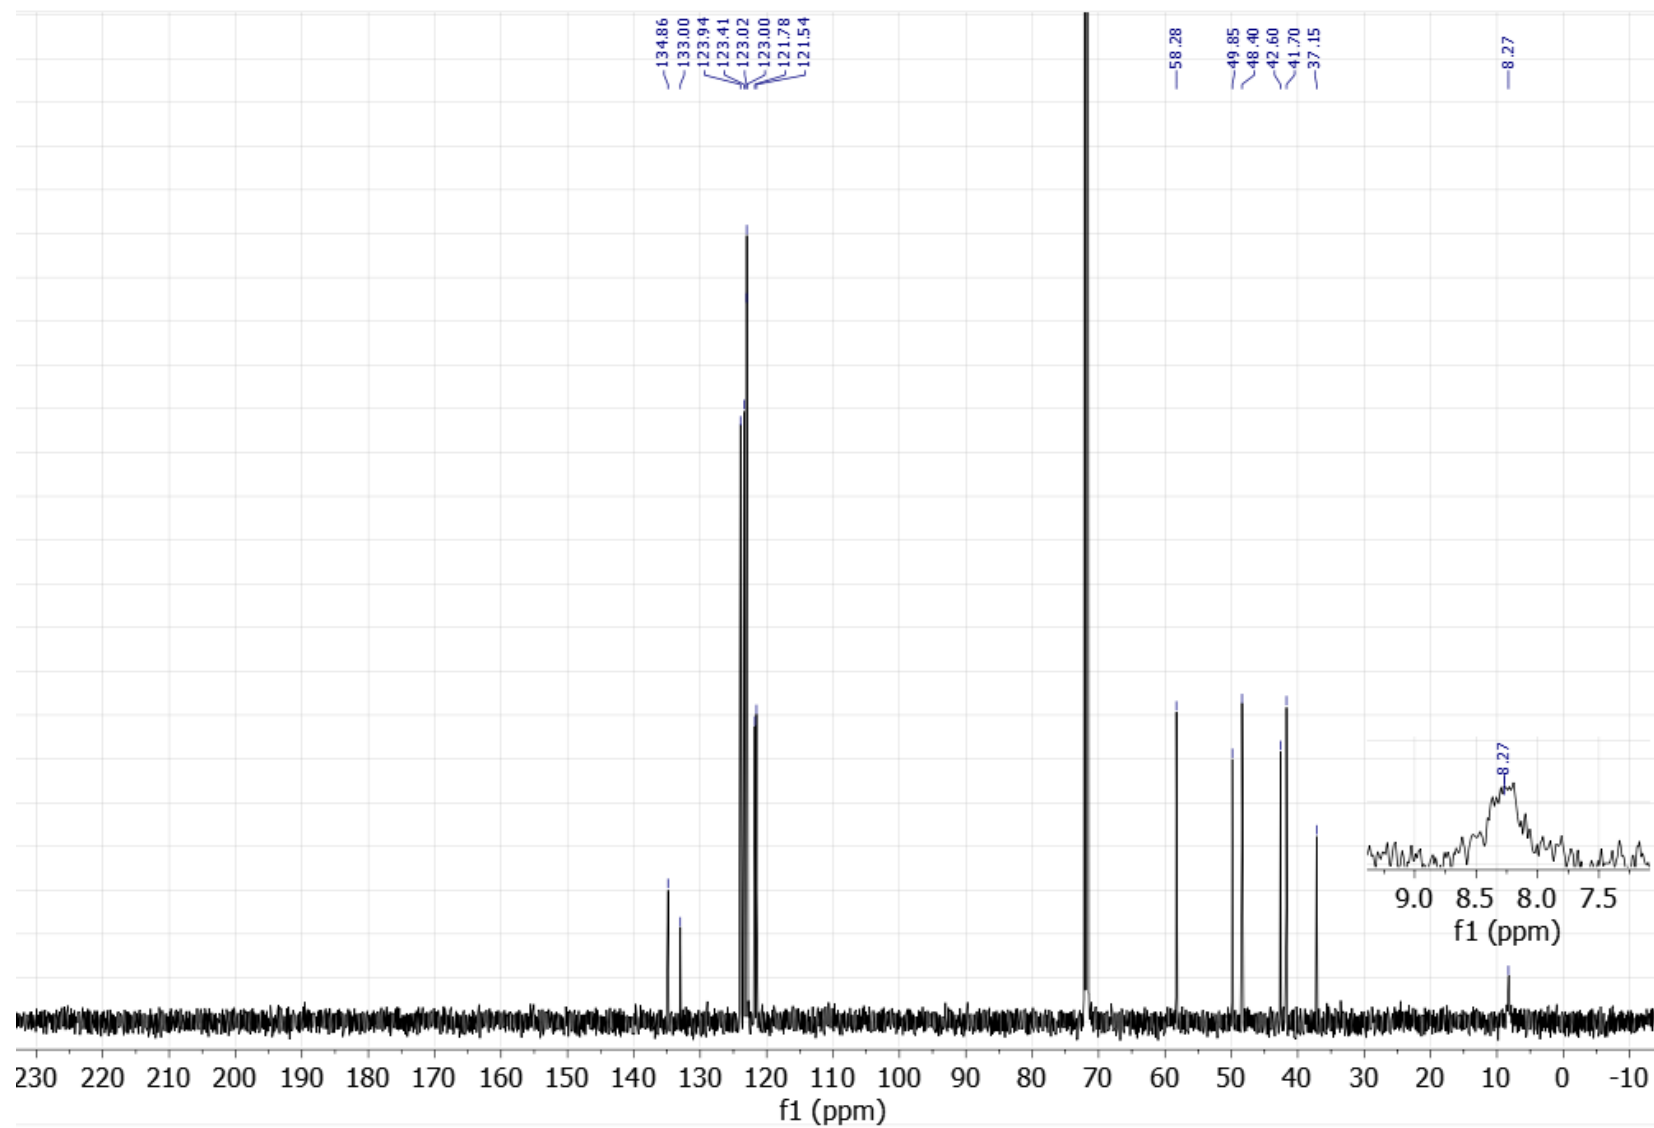

Compound **S27** x 2TsOH  $^1\text{H}$  NMR (500 MHz,  $\text{CD}_3\text{CN}$ )

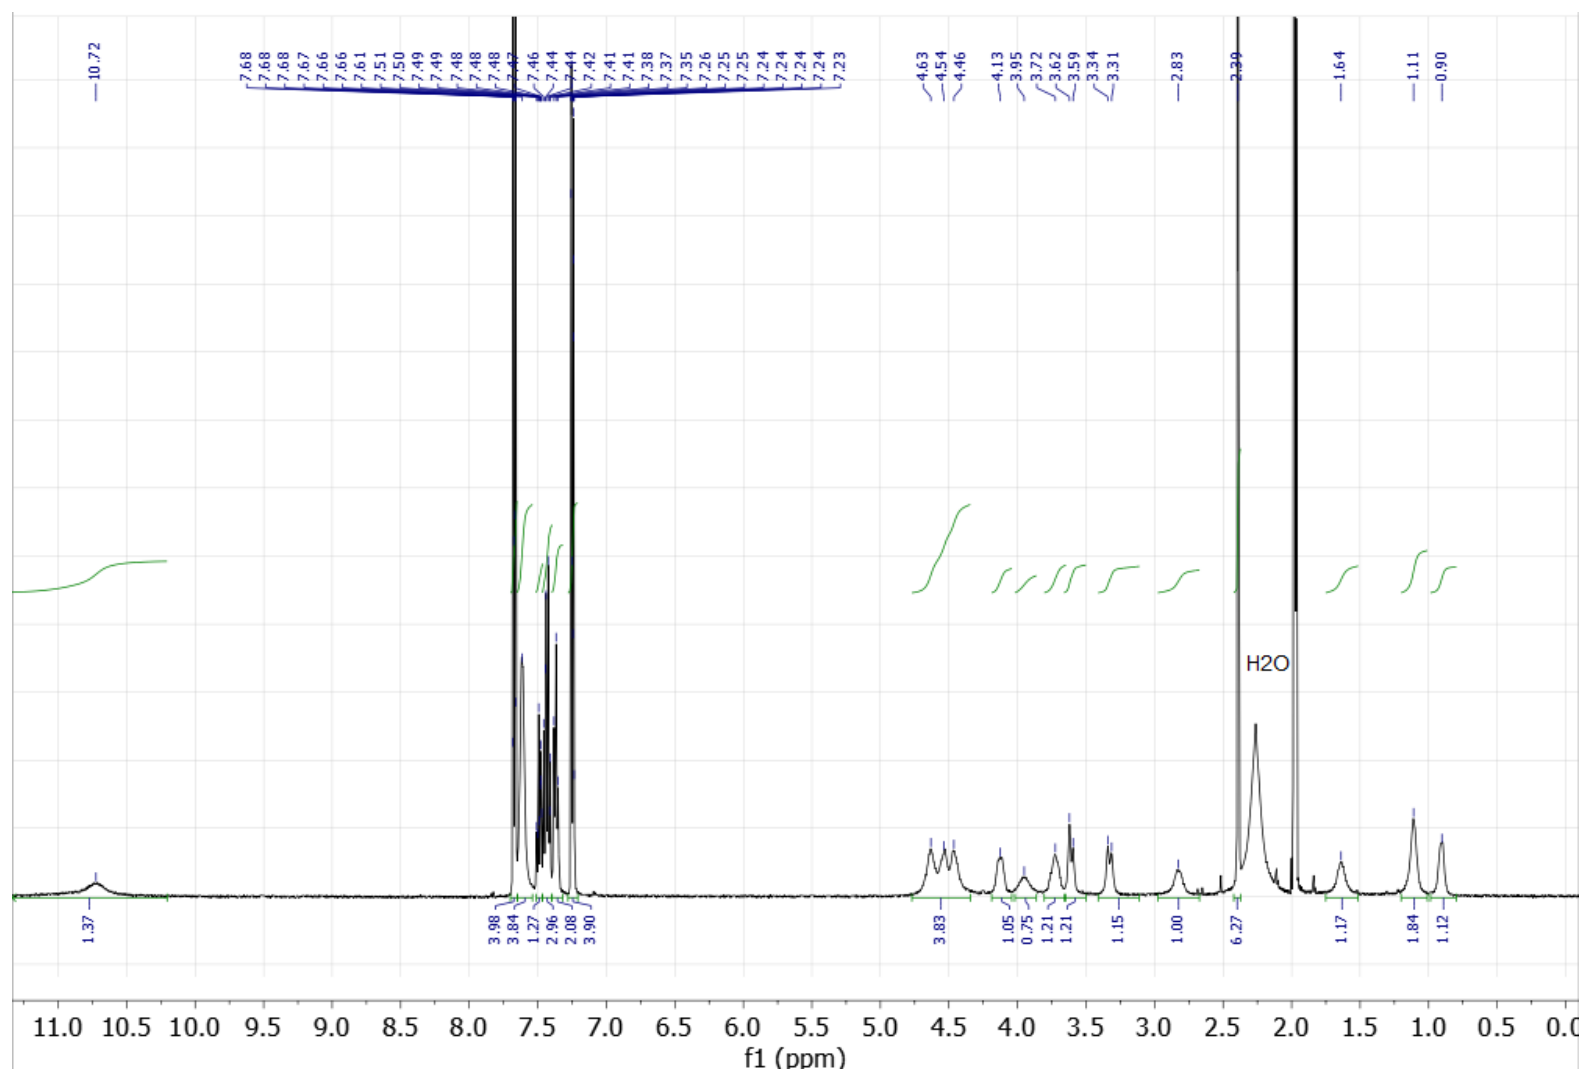

S112



## 5. Low-temperature NMR

Compound S1  $^1\text{H}$  NMR (400 MHz,  $d_6$ -Acetone,  $-78\text{ }^\circ\text{C}$ )

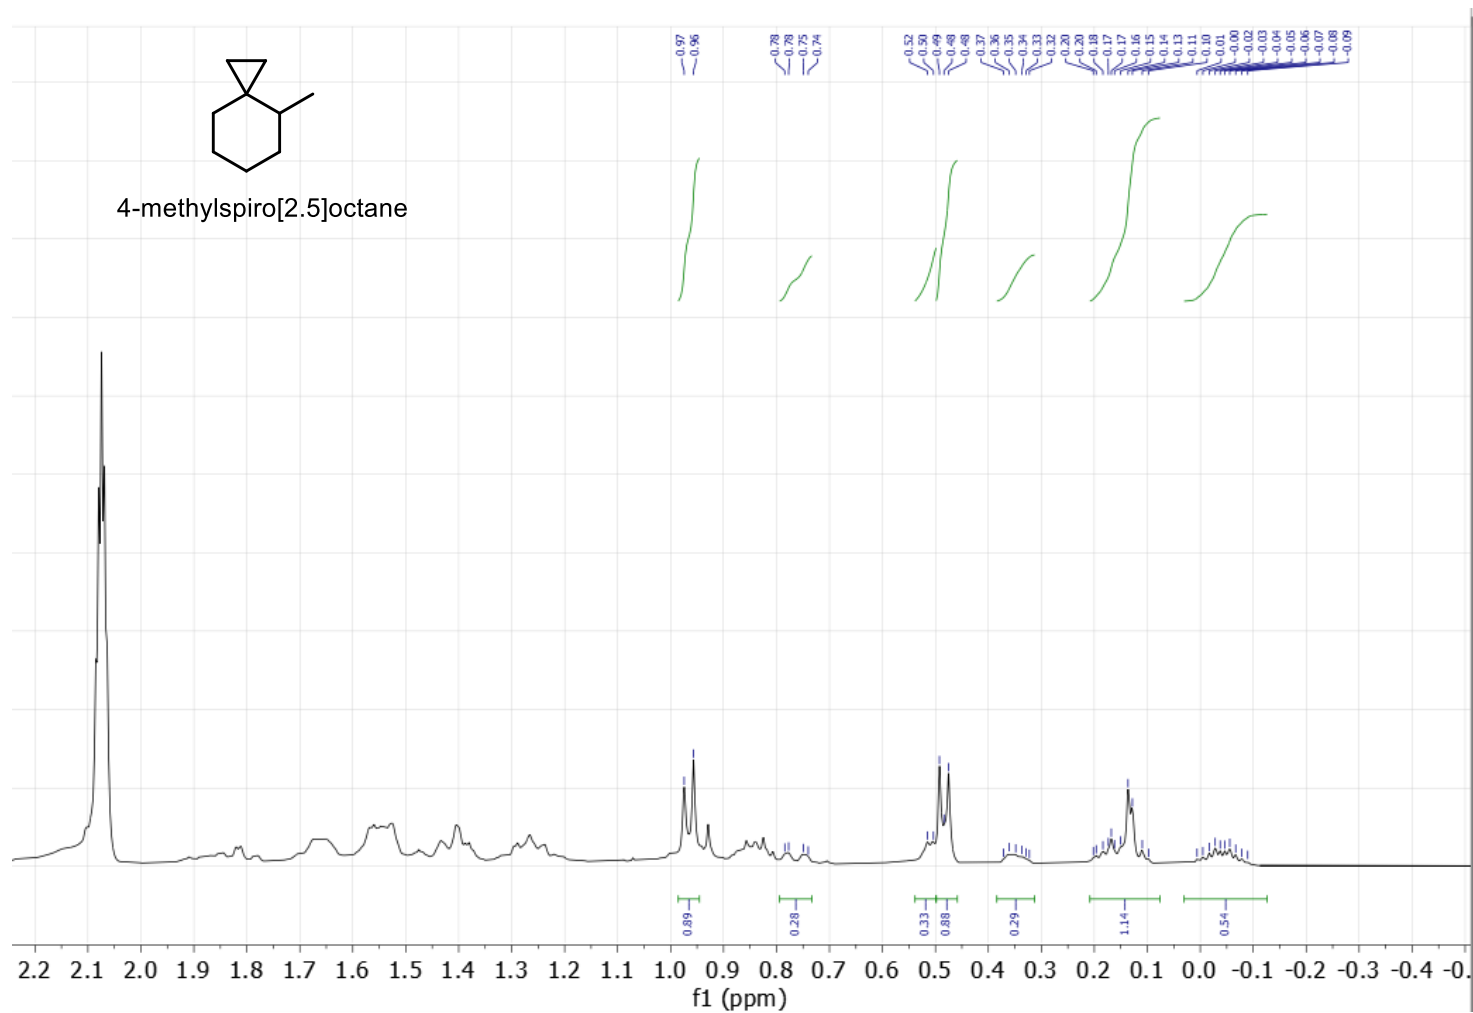

Compound **S1** HSQC (400 MHz, *d*<sub>6</sub>-Acetone, -78 °C)

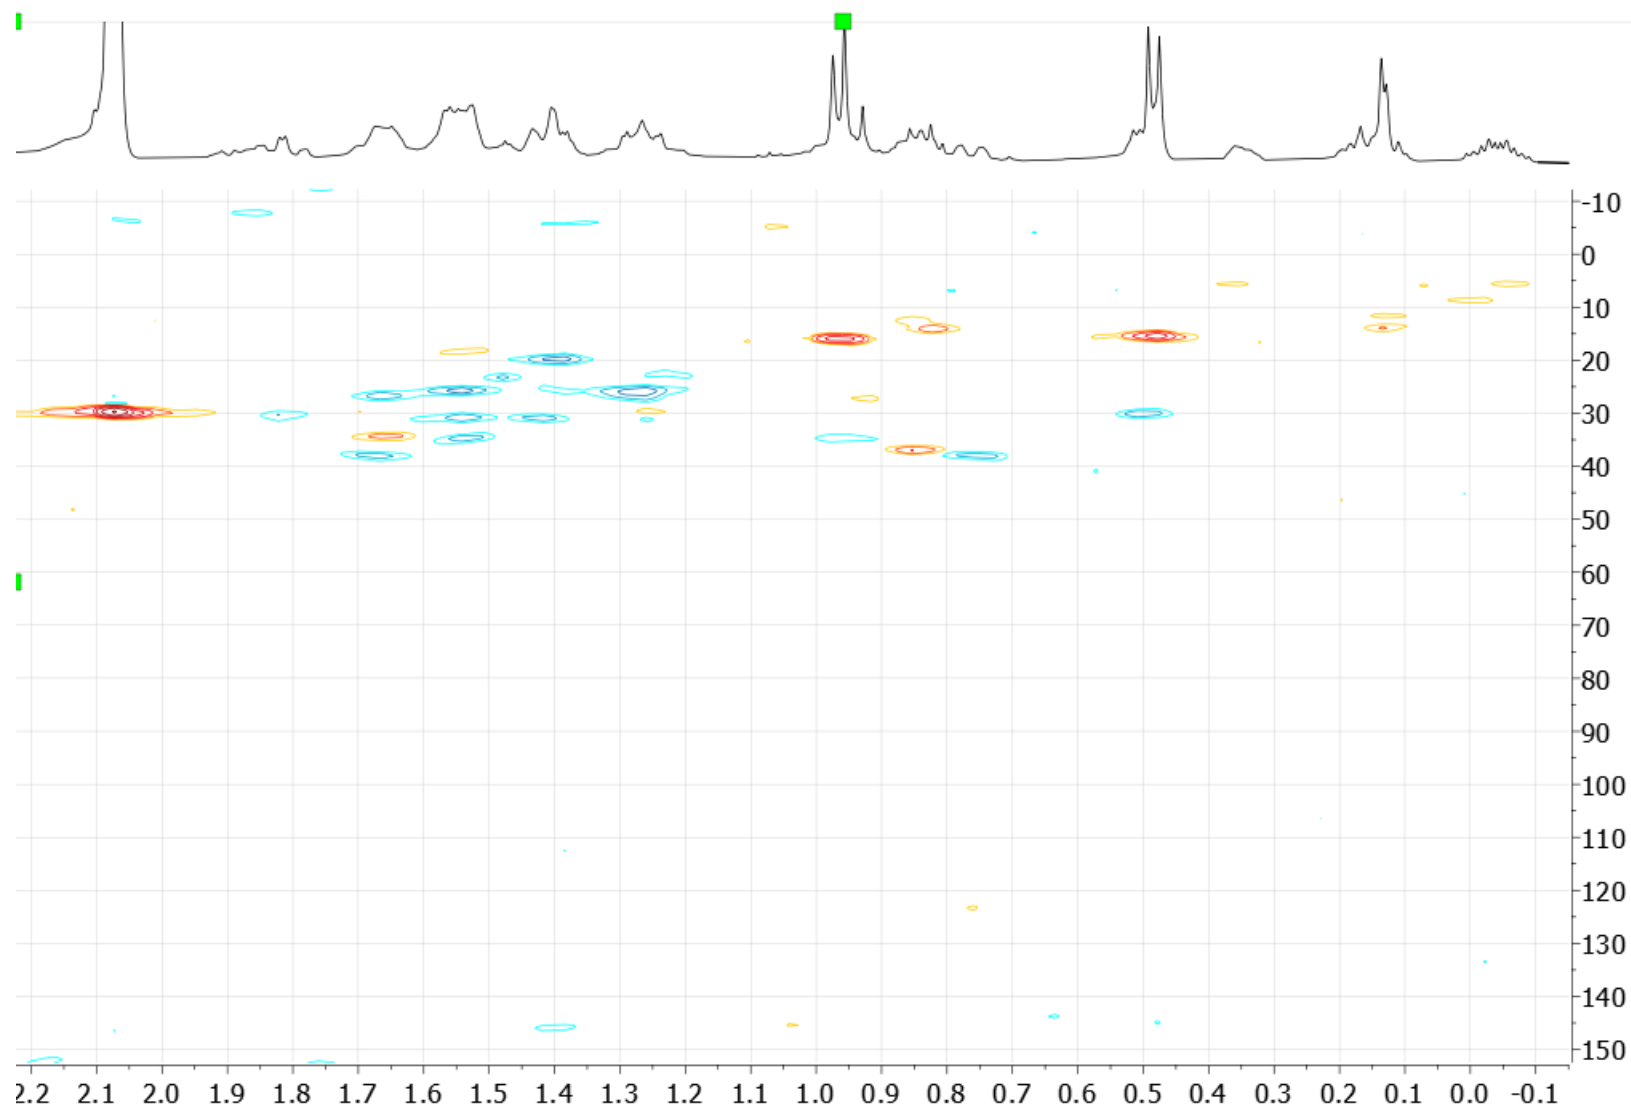

Compound S2  $^1\text{H}$  NMR (400 MHz,  $d_6$ -Acetone,  $-78\text{ }^\circ\text{C}$ )

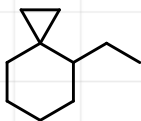

4-ethylspiro[2.5]octane

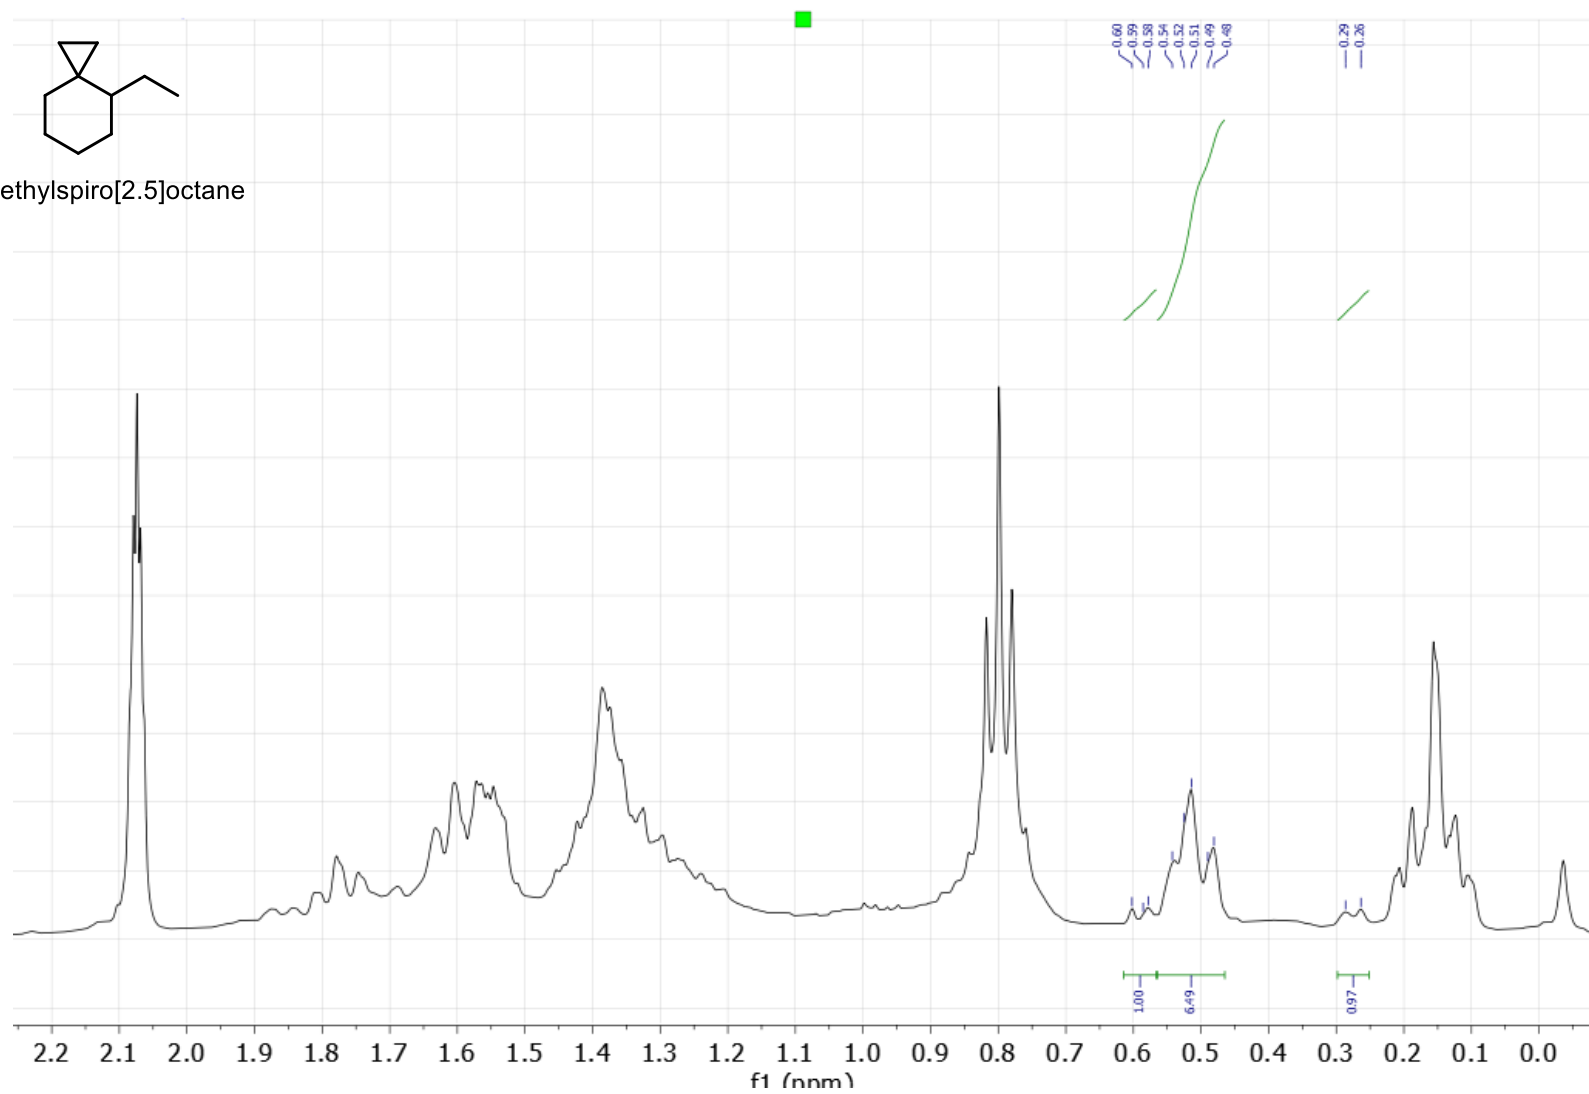

Compound **S2** HSQC (400 MHz, *d*<sub>6</sub>-Acetone, -78 °C)

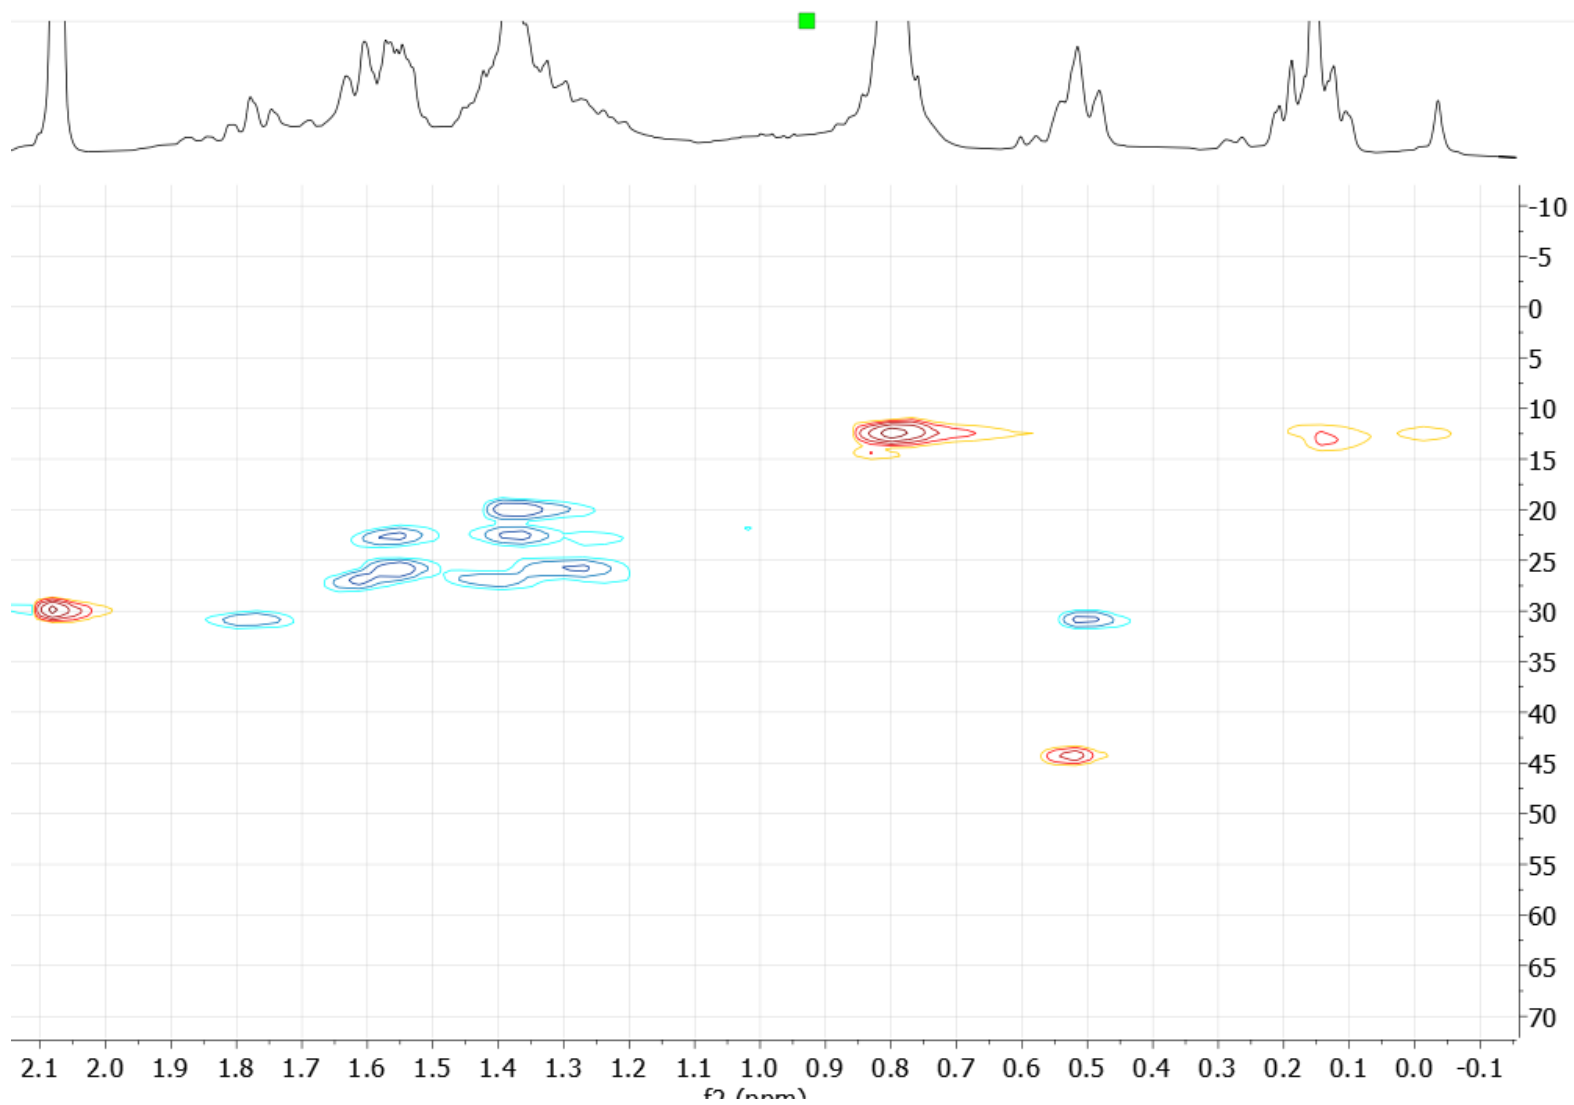

Compound **S3**  $^1\text{H}$  NMR (400 MHz,  $d_6$ -Acetone,  $-78\text{ }^\circ\text{C}$ )

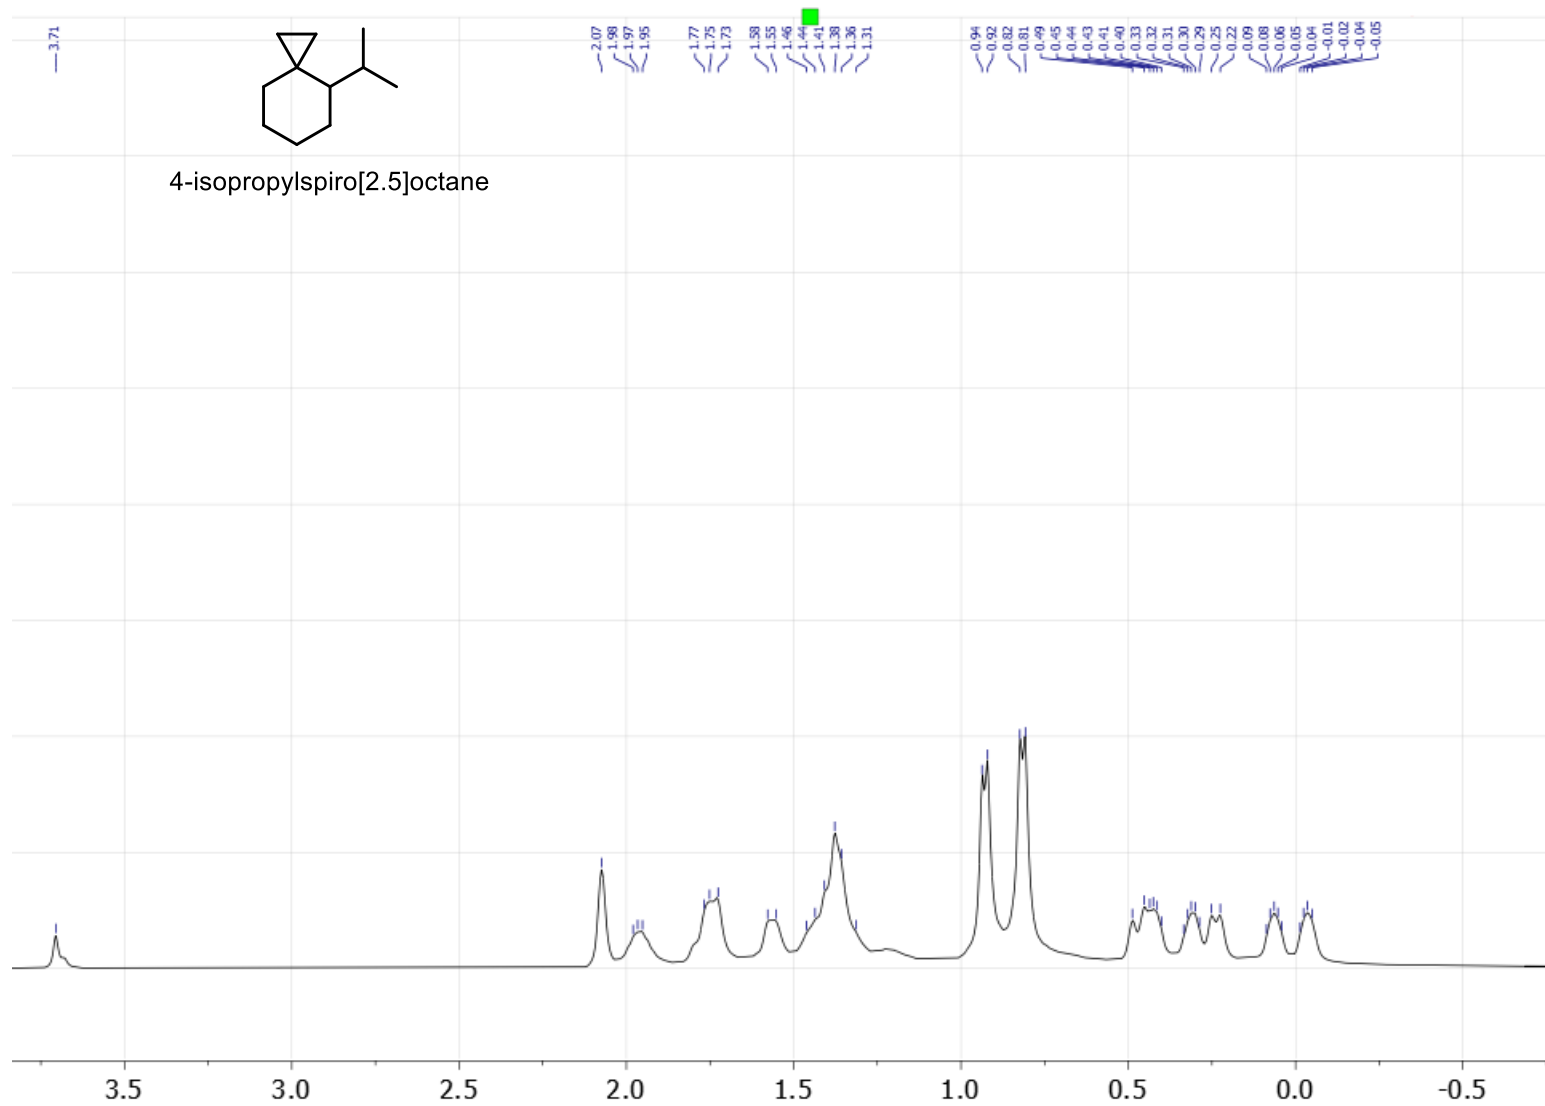

Compound **S3** HSQC (400 MHz, *d*<sub>6</sub>-Acetone, -78 °C)

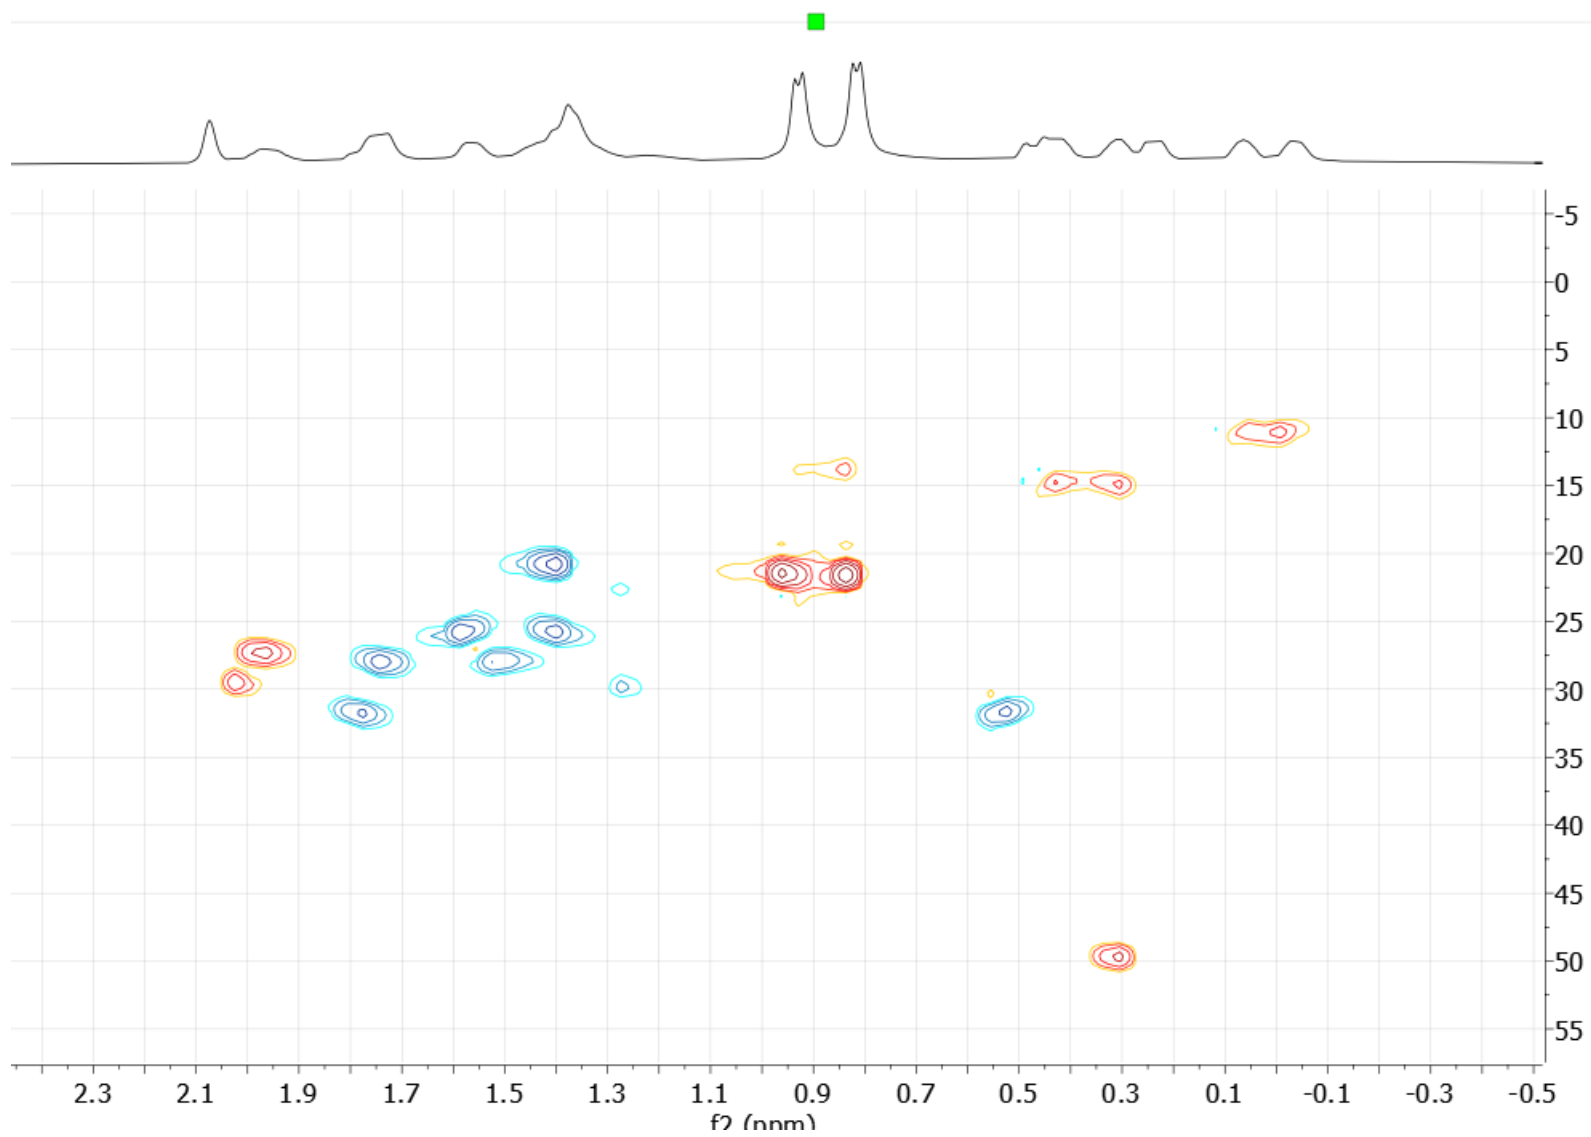

Compound S4  $^1\text{H}$  NMR (400 MHz,  $d_6$ -Acetone,  $-78\text{ }^\circ\text{C}$ )

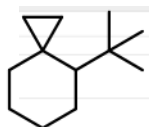

4-(*tert*-butyl)spiro[2.5]octane

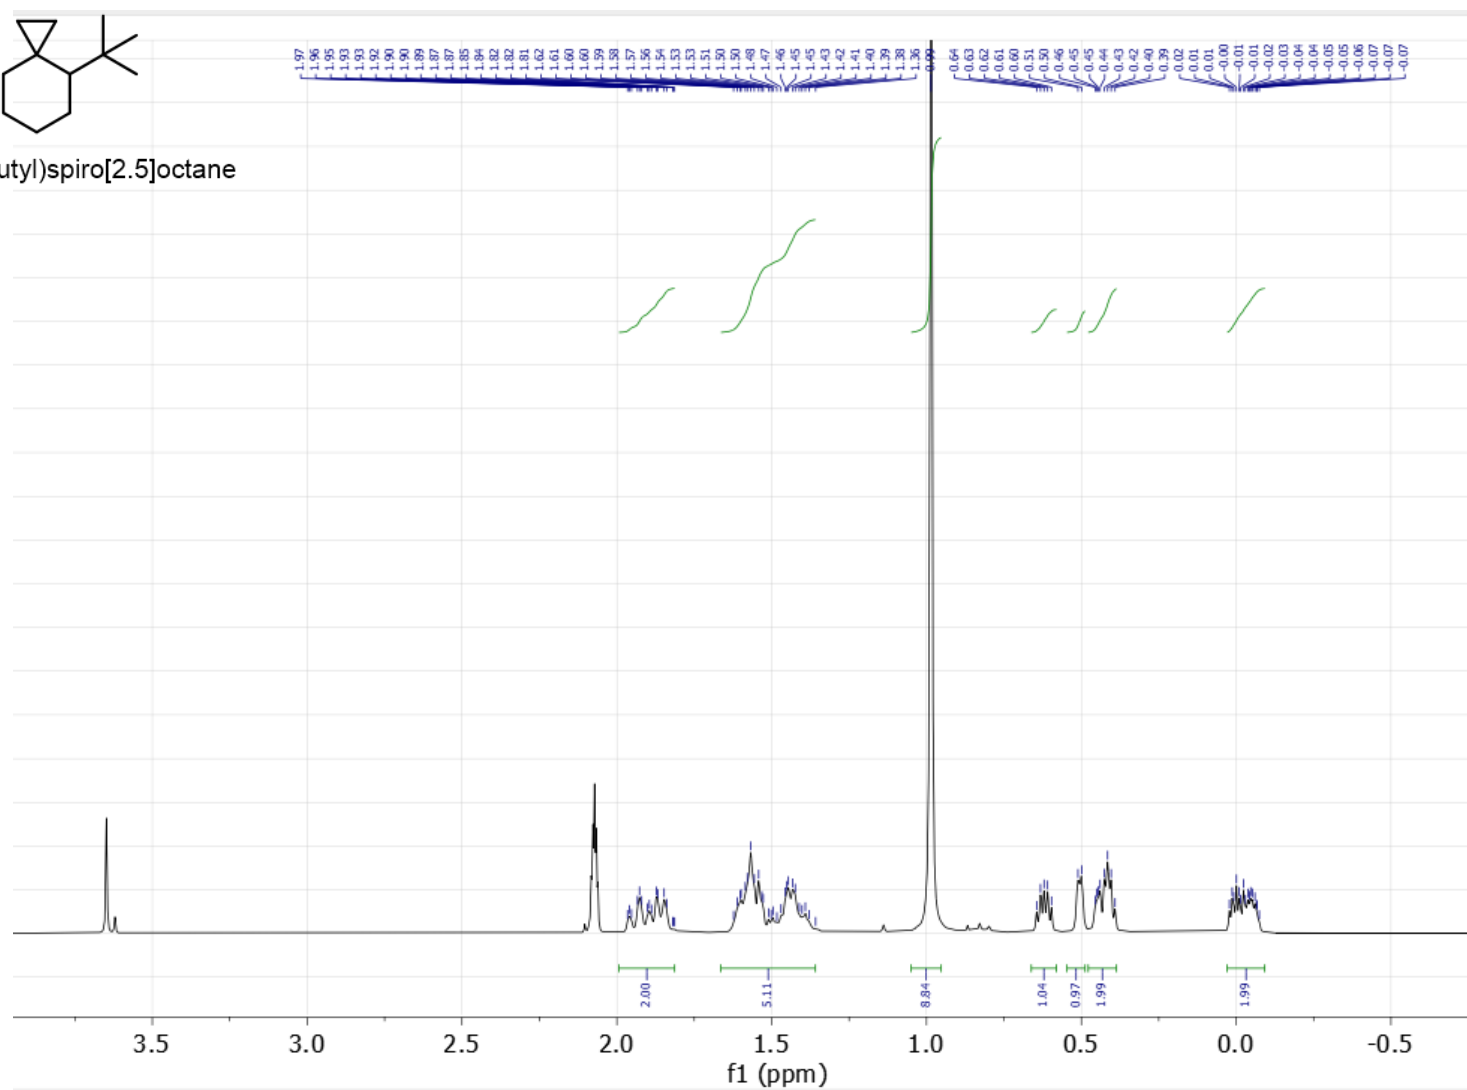

Compound **S5**  $^1\text{H}$  NMR (400 MHz,  $d_6$ -Acetone,  $-78\text{ }^\circ\text{C}$ )

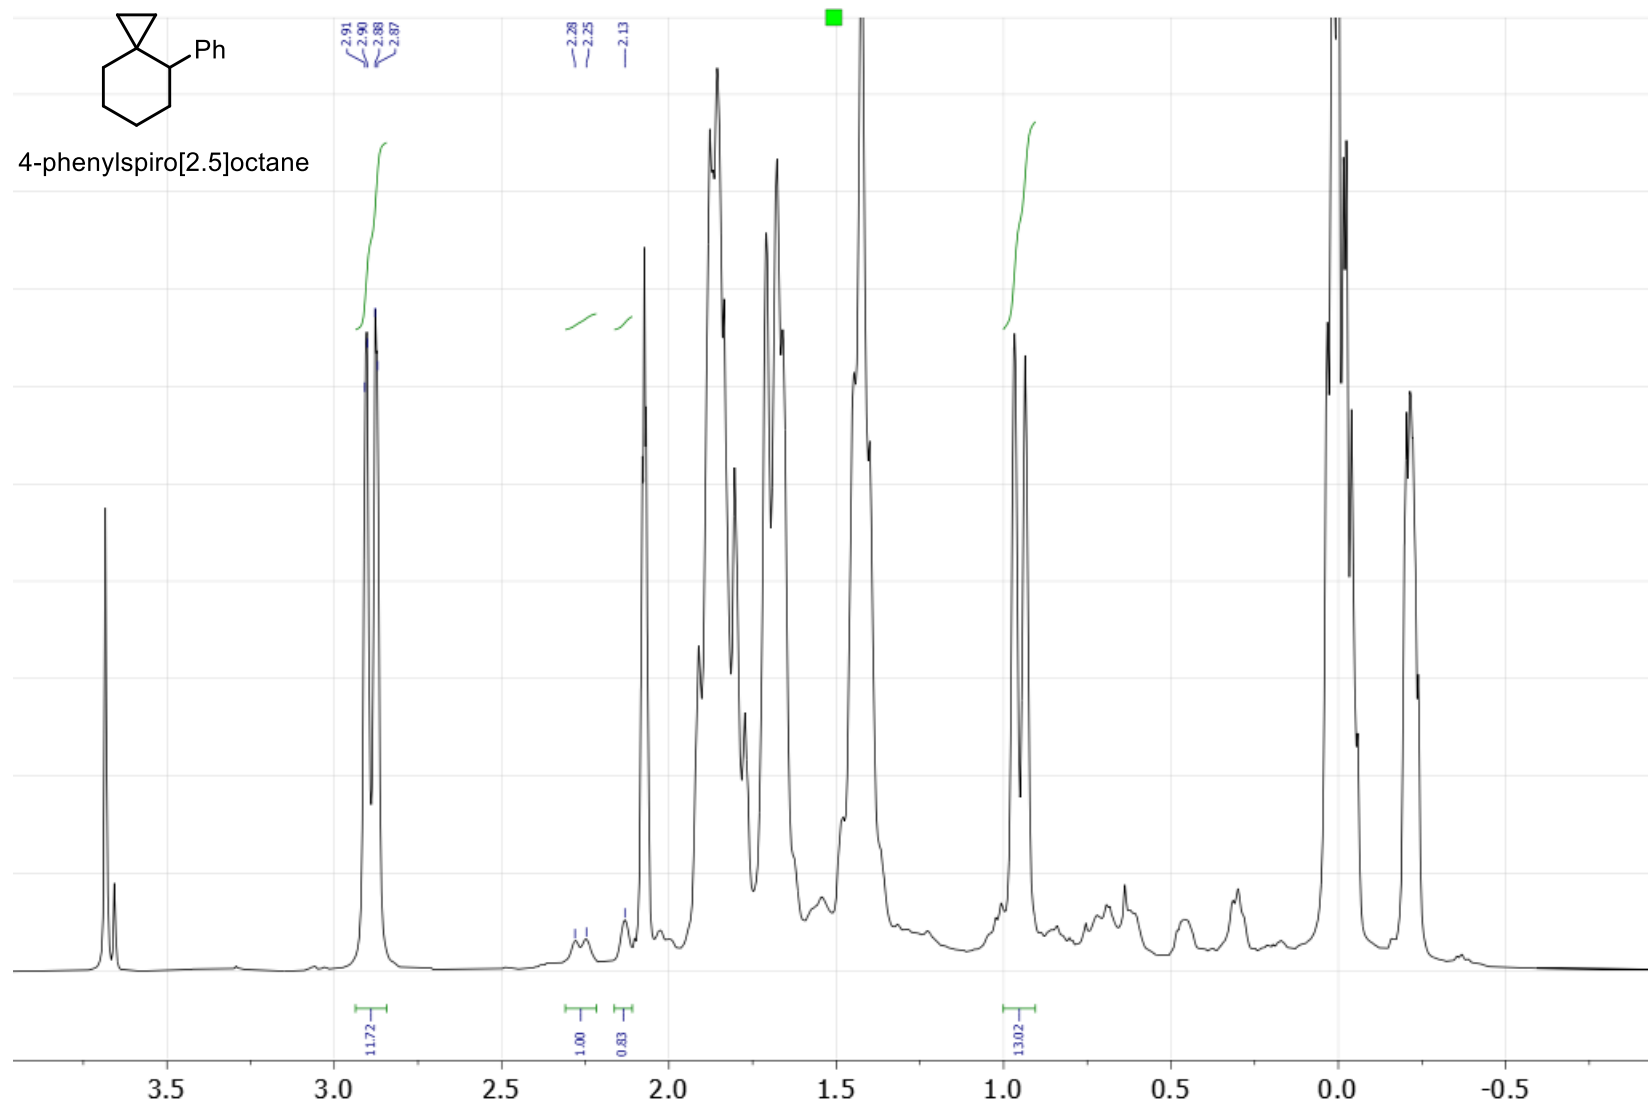



Compound **S5** HSQC (400 MHz, *d*<sub>6</sub>-Acetone, -78 °C)

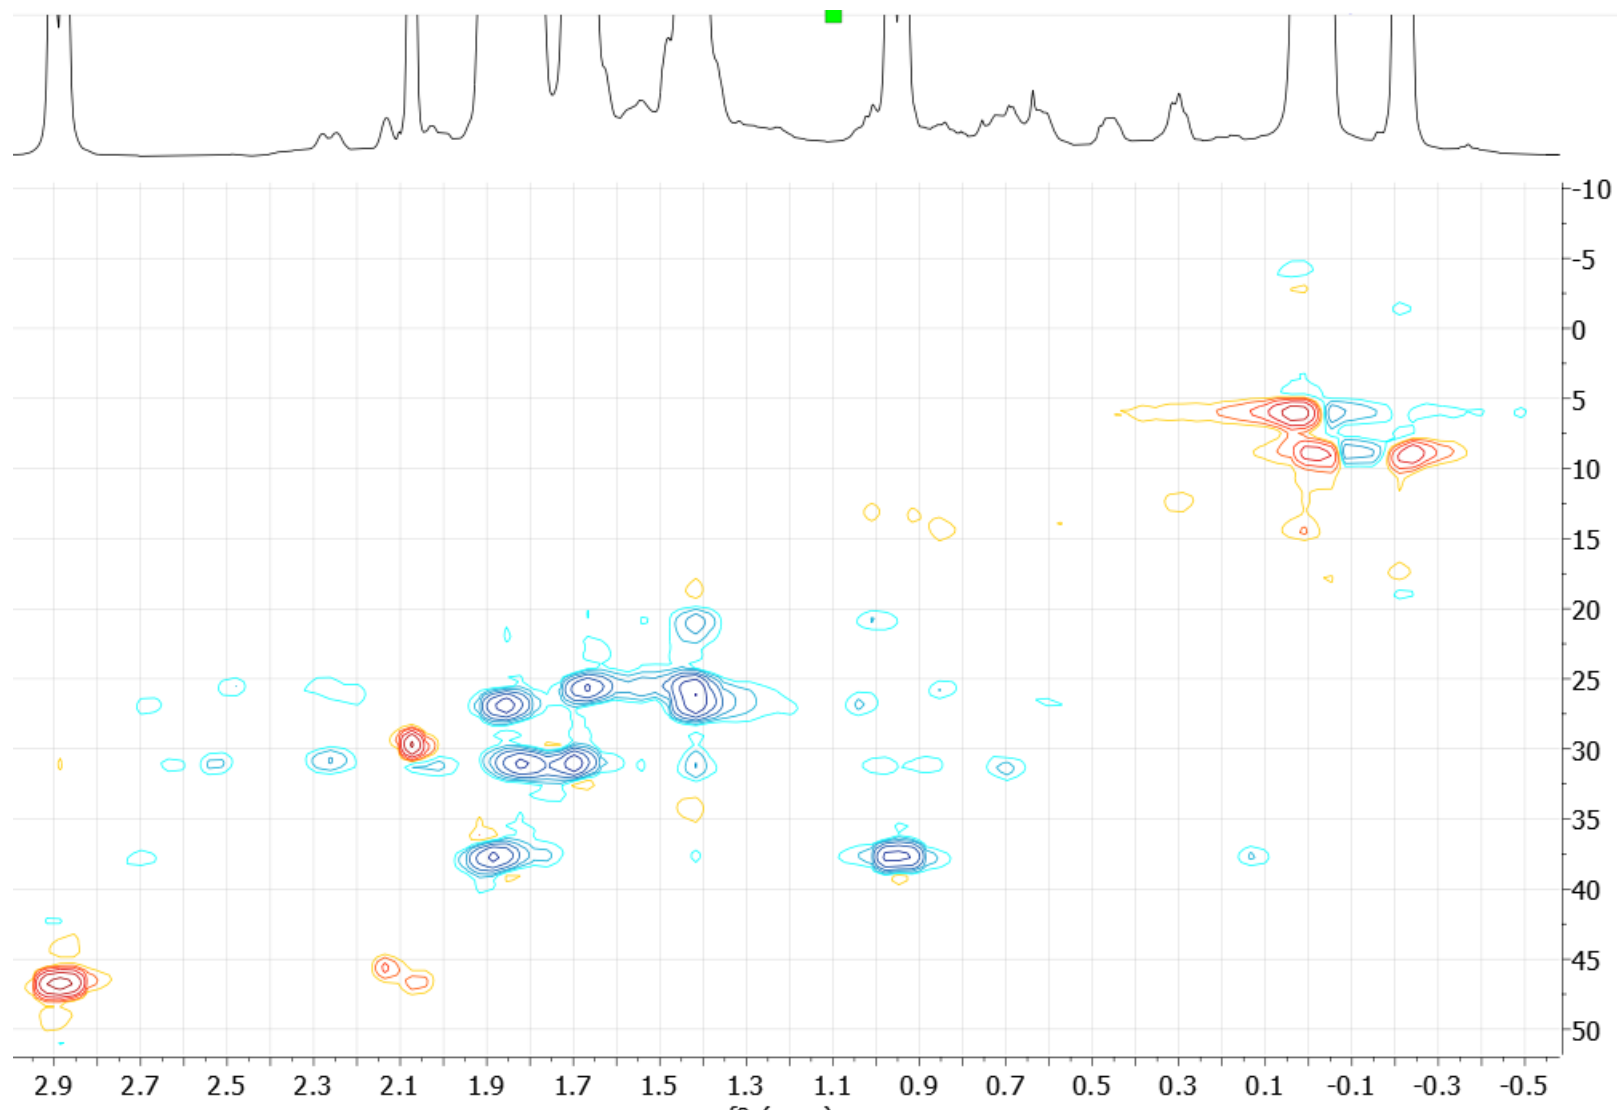

Compound **S5 1D NOE** (irradiation at 2.89 ppm, 400 MHz, *d*<sub>6</sub>-Acetone, -78 °C)

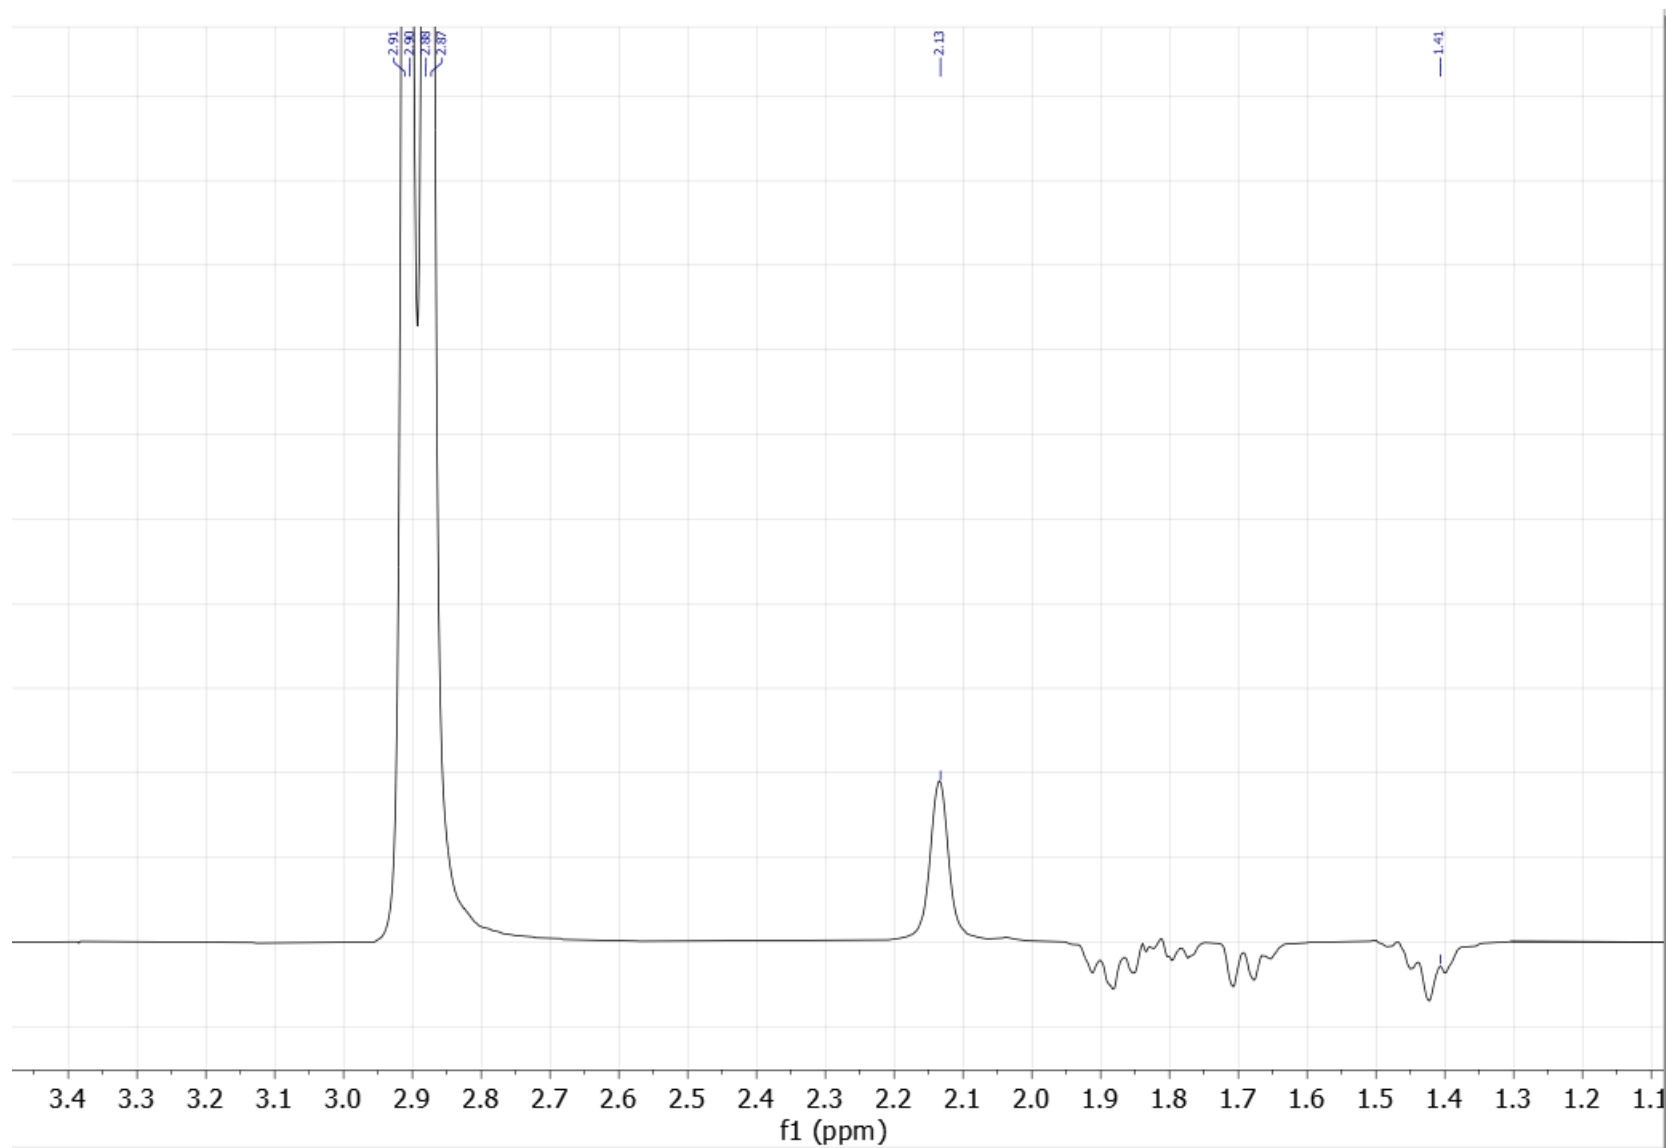

Compound **S5 1D NOE** (irradiation at 2.13 ppm, 400 MHz, *d*<sub>6</sub>-Acetone, -78 °C)

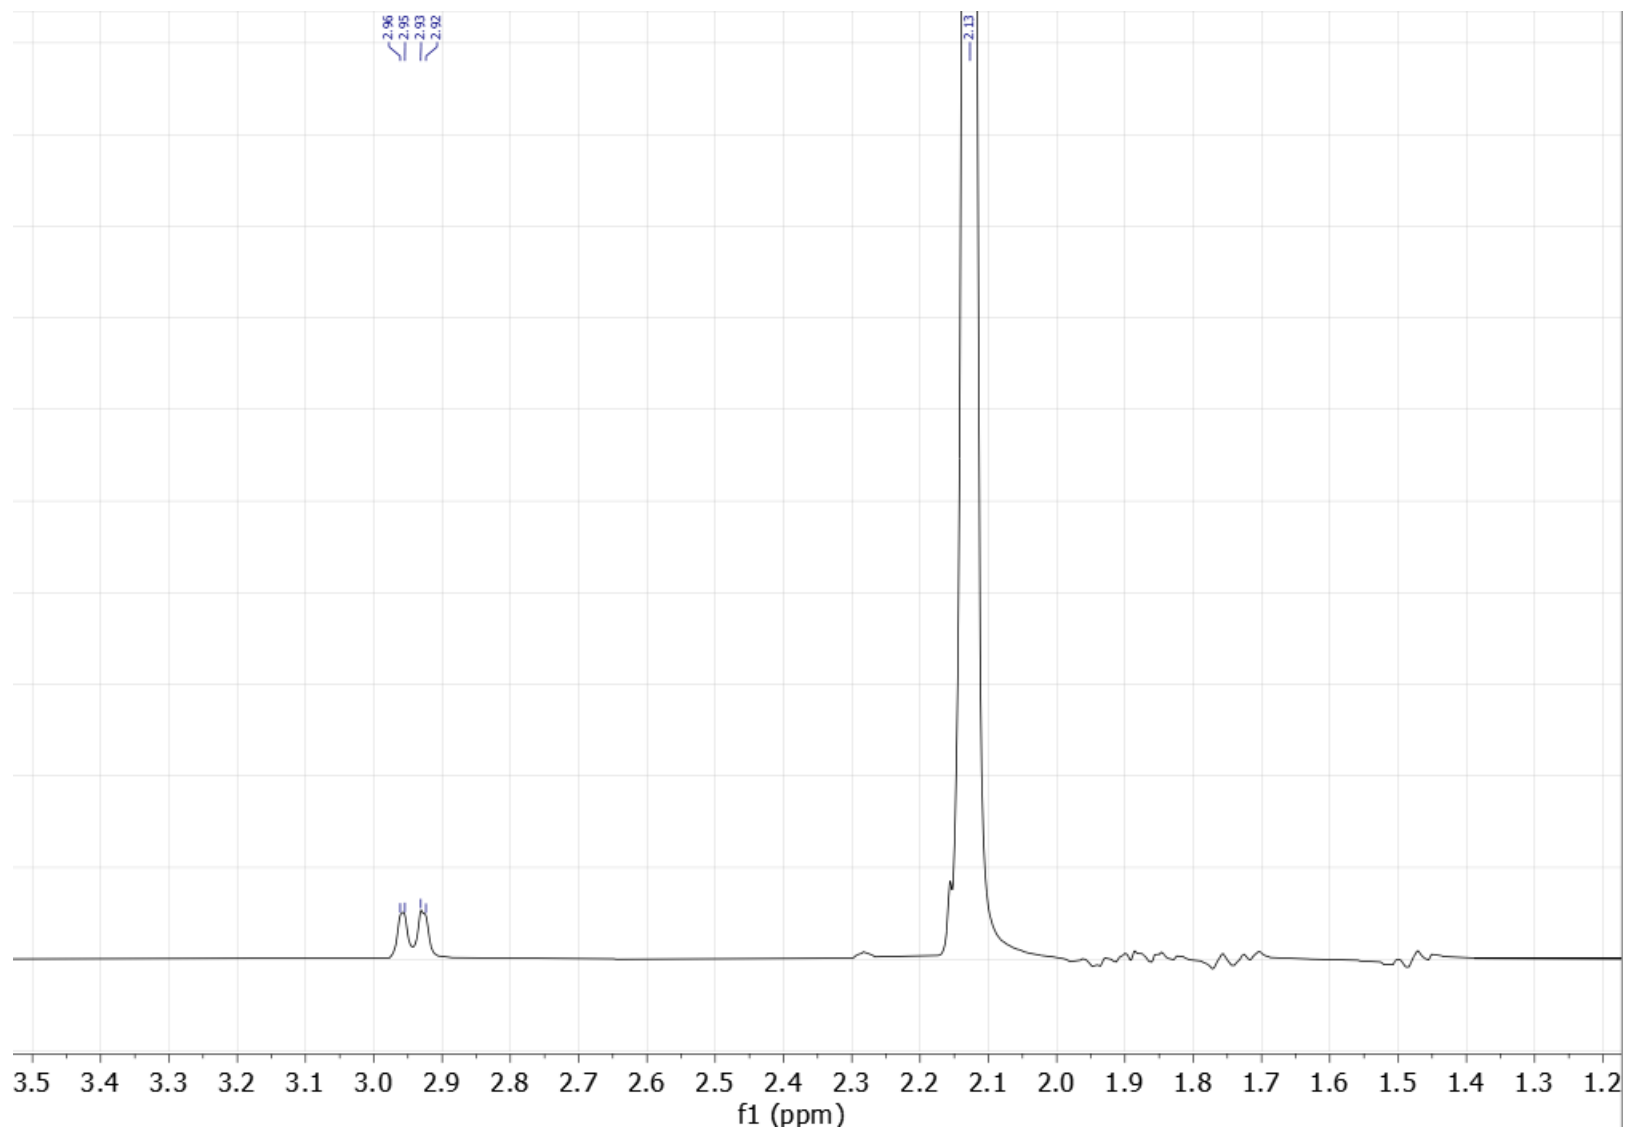

Compound S6  $^1\text{H}$  NMR (400 MHz,  $d_6$ -Acetone,  $-78\text{ }^\circ\text{C}$ )

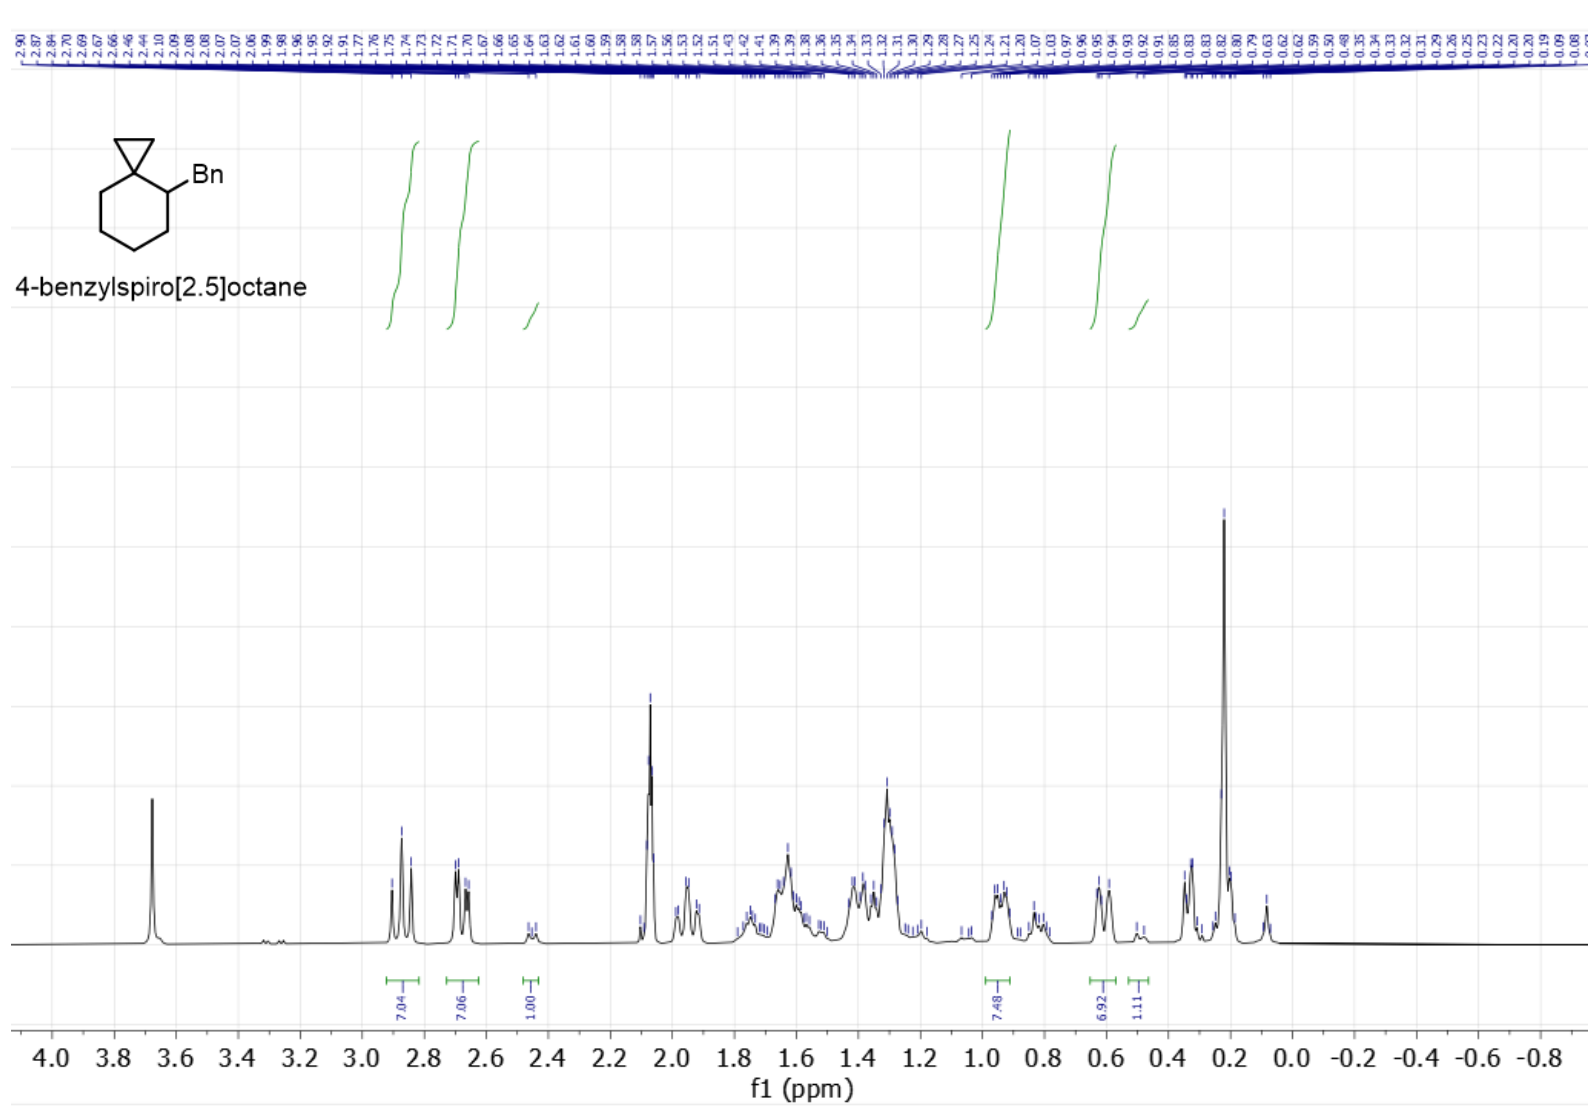

Compound **S6** HSQC (400 MHz, *d*<sub>6</sub>-Acetone, -78 °C)

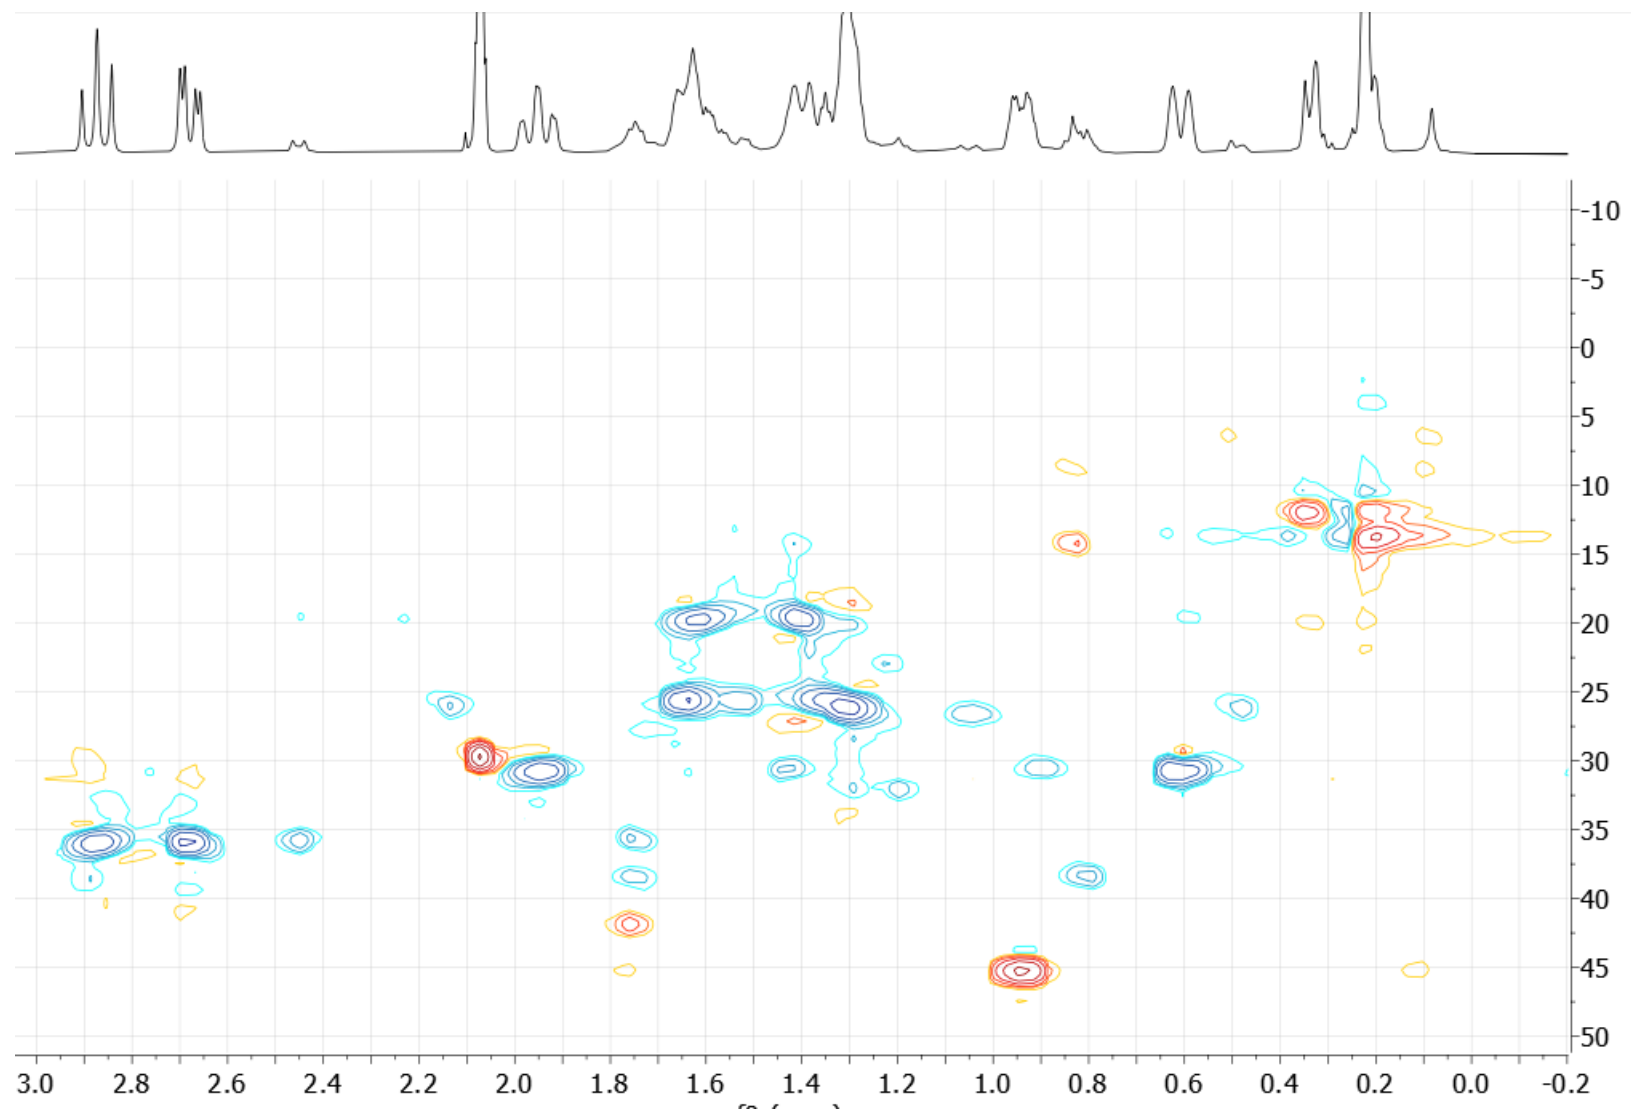

Compound **S6 1D NOE** (irradiation at 0.94 ppm, 400 MHz, *d*<sub>6</sub>-Acetone, -78 °C)

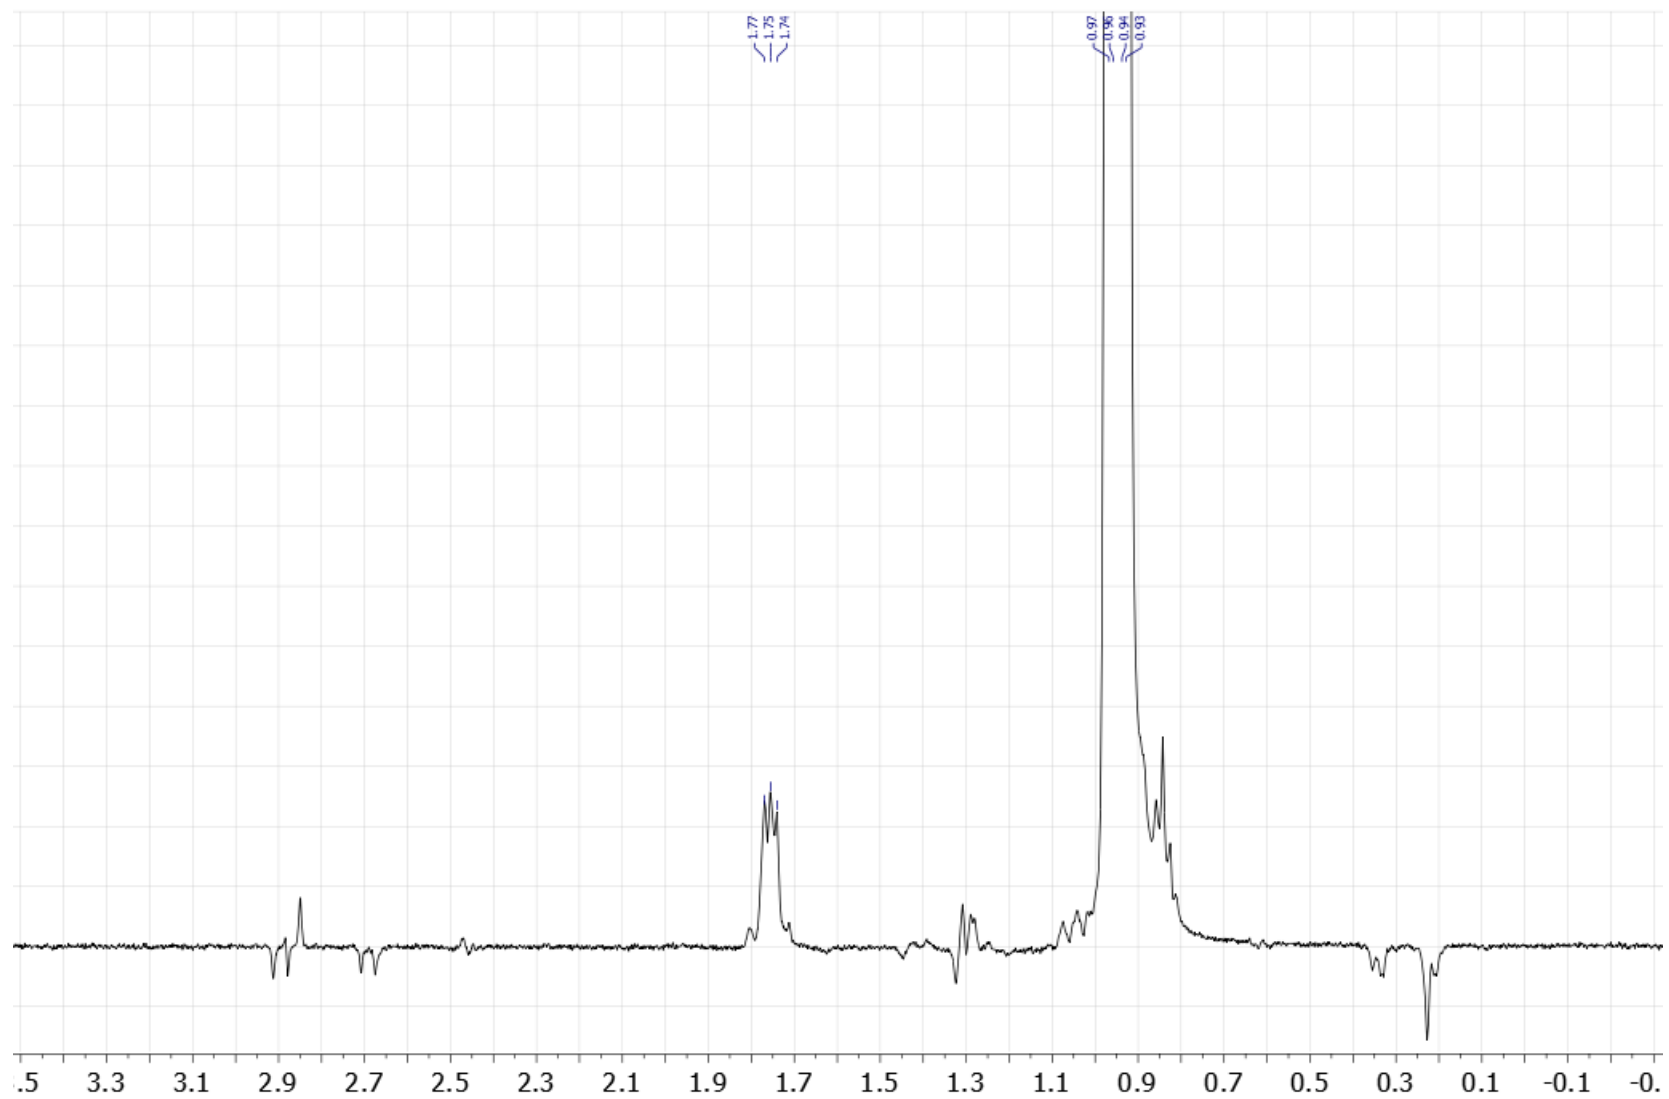

Compound S7  $^1\text{H}$  NMR (400 MHz,  $d_6$ -Acetone,  $-78\text{ }^\circ\text{C}$ )

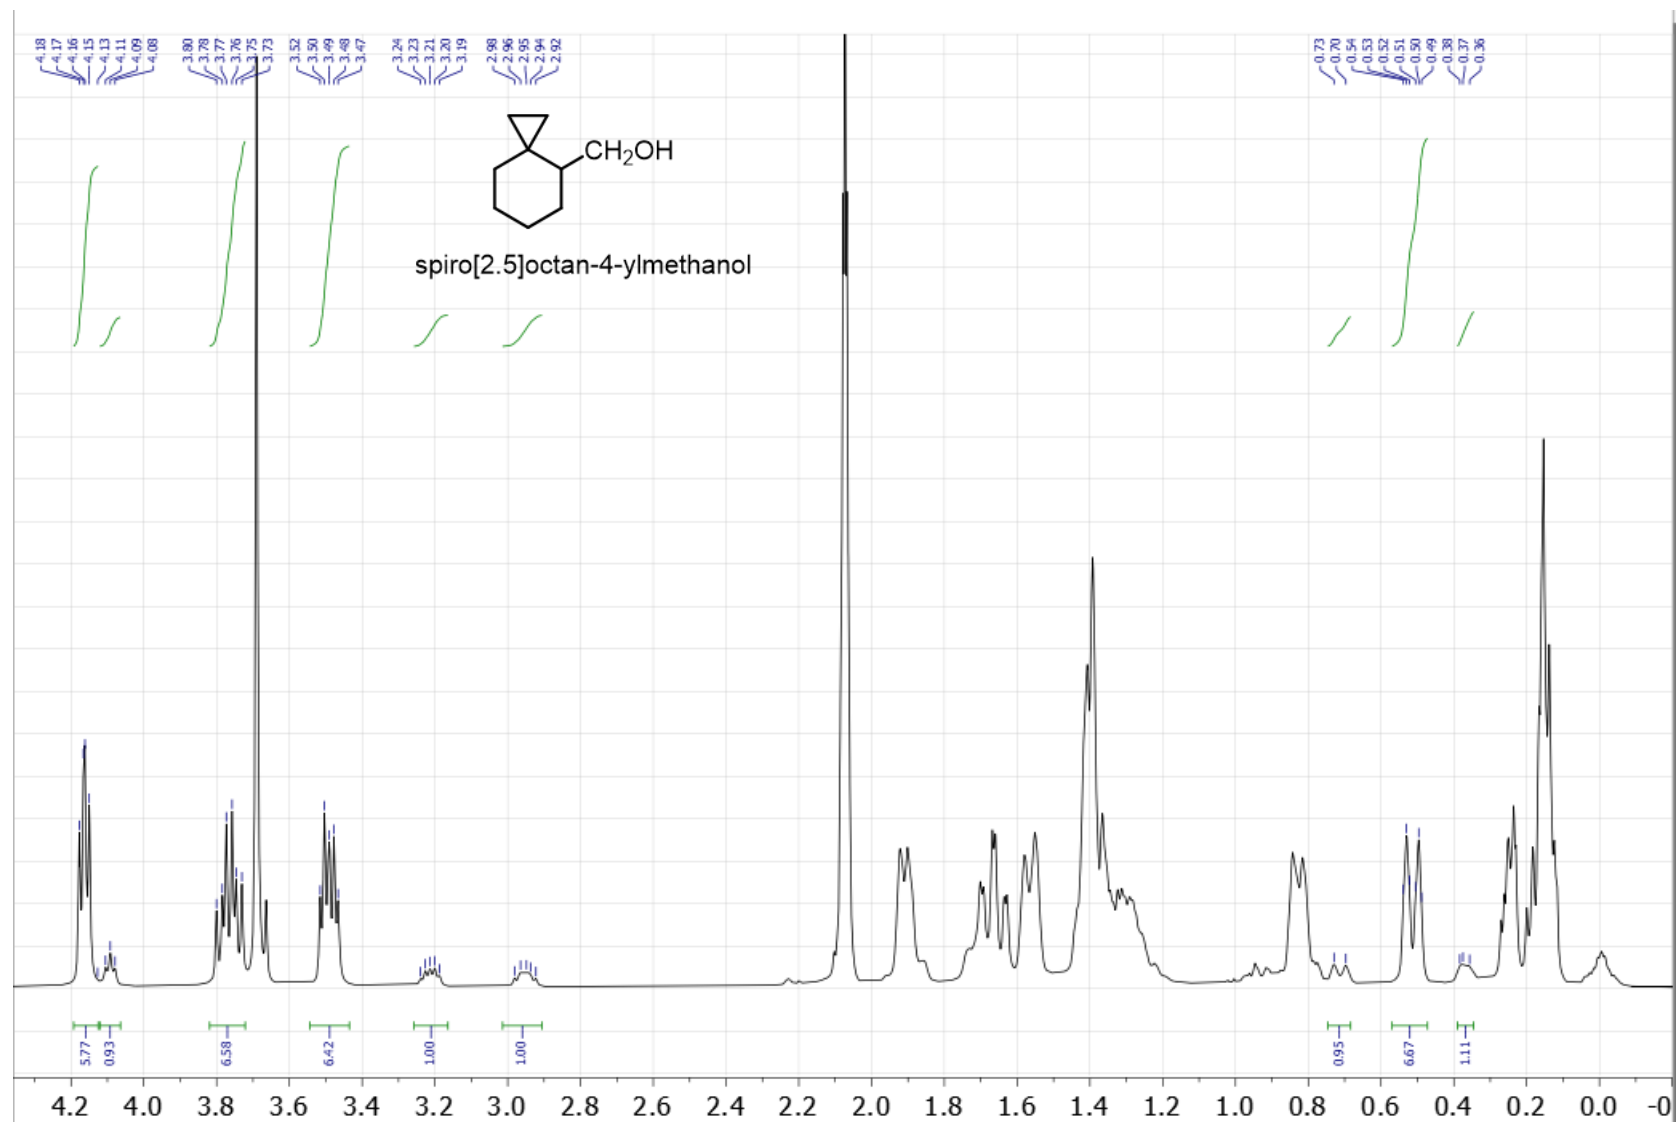

Compound **S7 1D NOE** (irradiation at 3.48 ppm, 400 MHz, *d*<sub>6</sub>-Acetone, -78 °C)

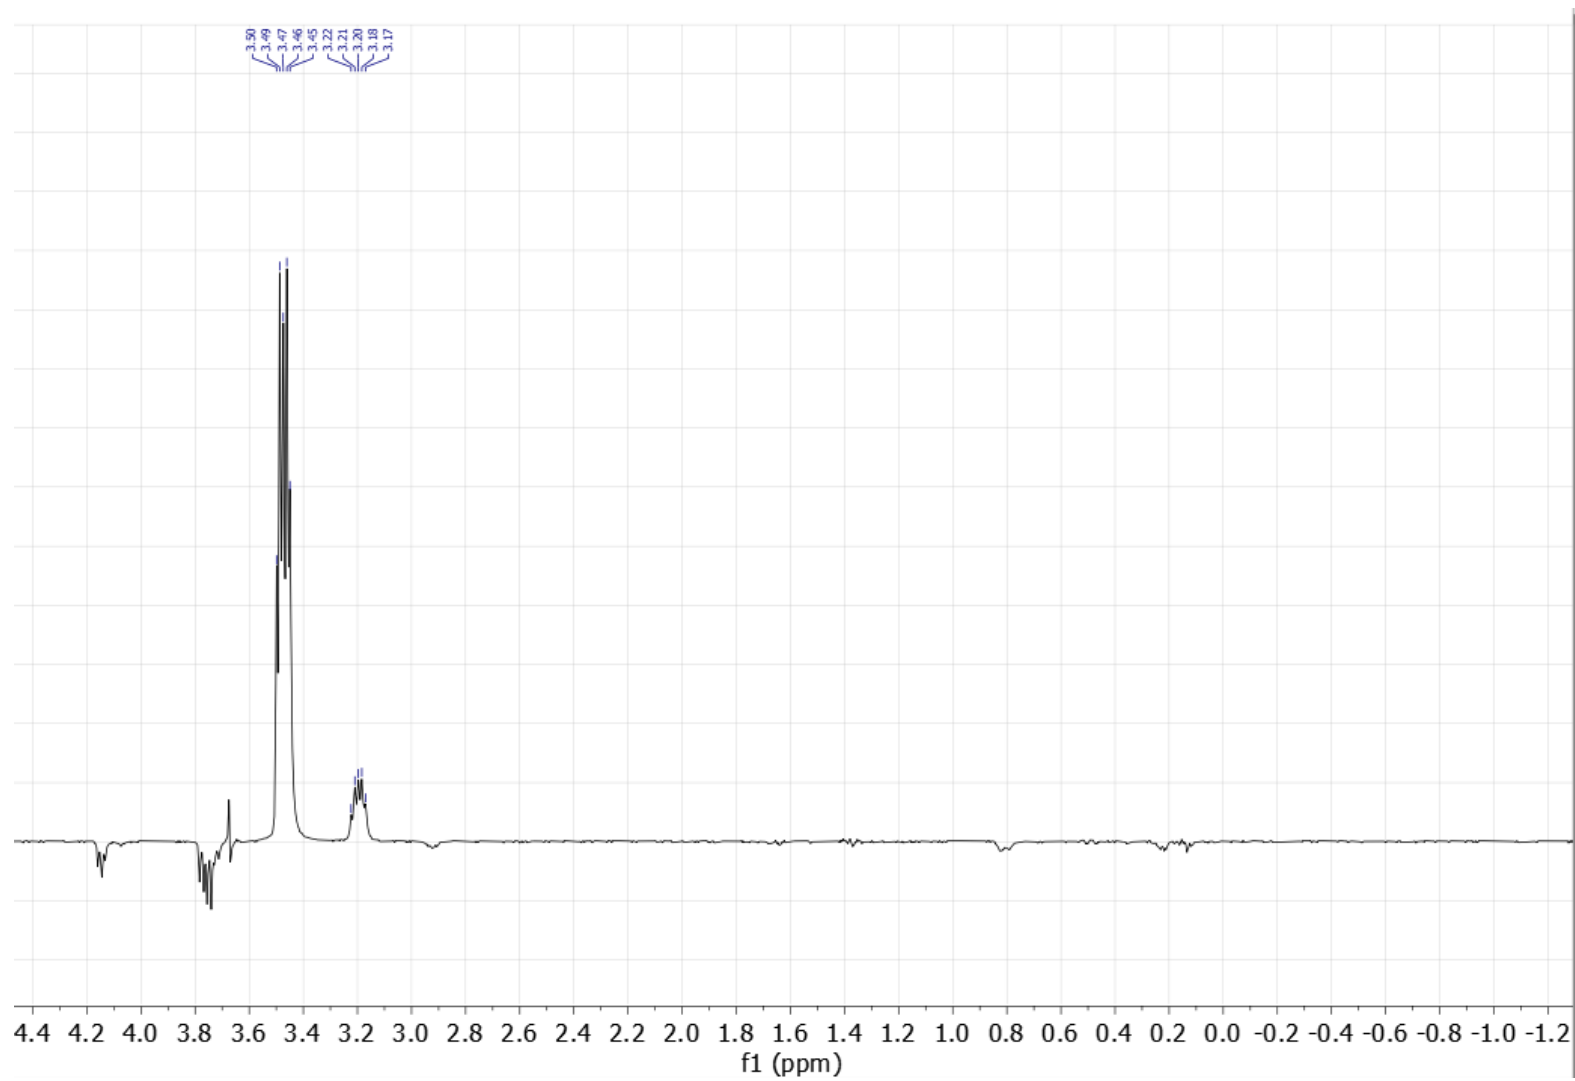



Compound **S8**  $^1\text{H}$  NMR (400 MHz,  $d_6$ -Acetone,  $-78\text{ }^\circ\text{C}$ )

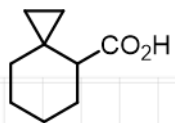

spiro[2.5]octane-4-carboxylic acid

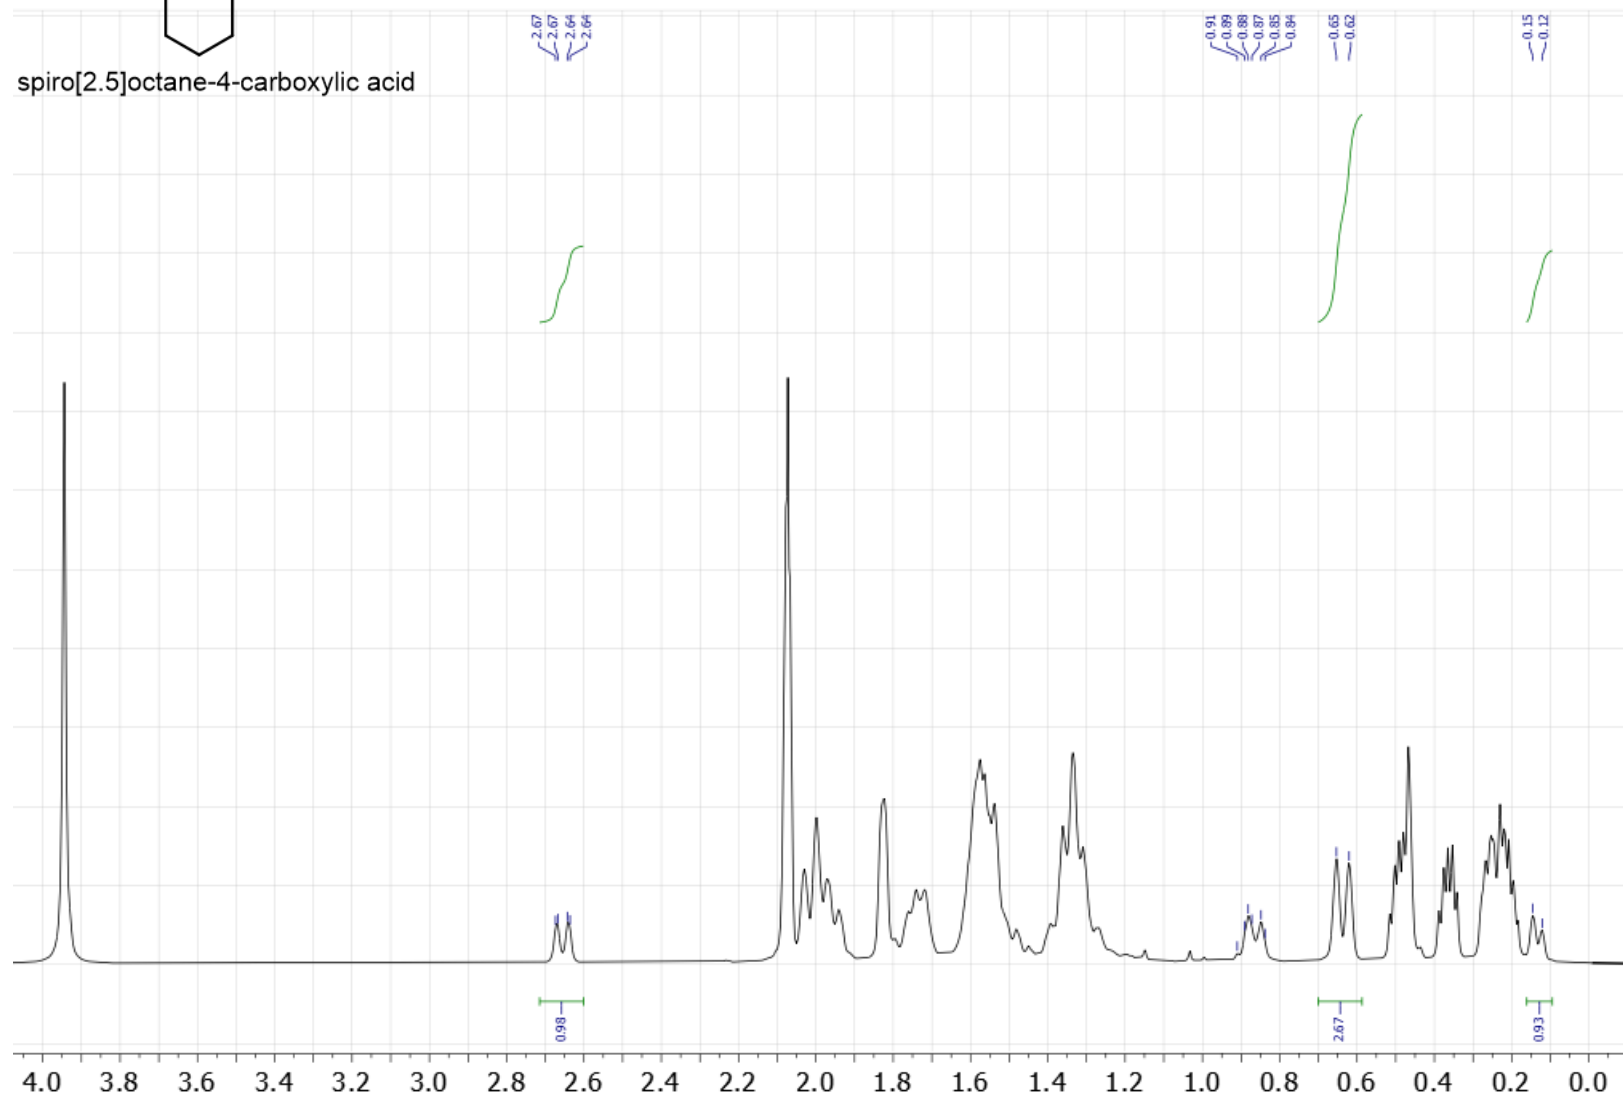

Compound **S8** HSQC (400 MHz, *d*<sub>6</sub>-Acetone, -78 °C)

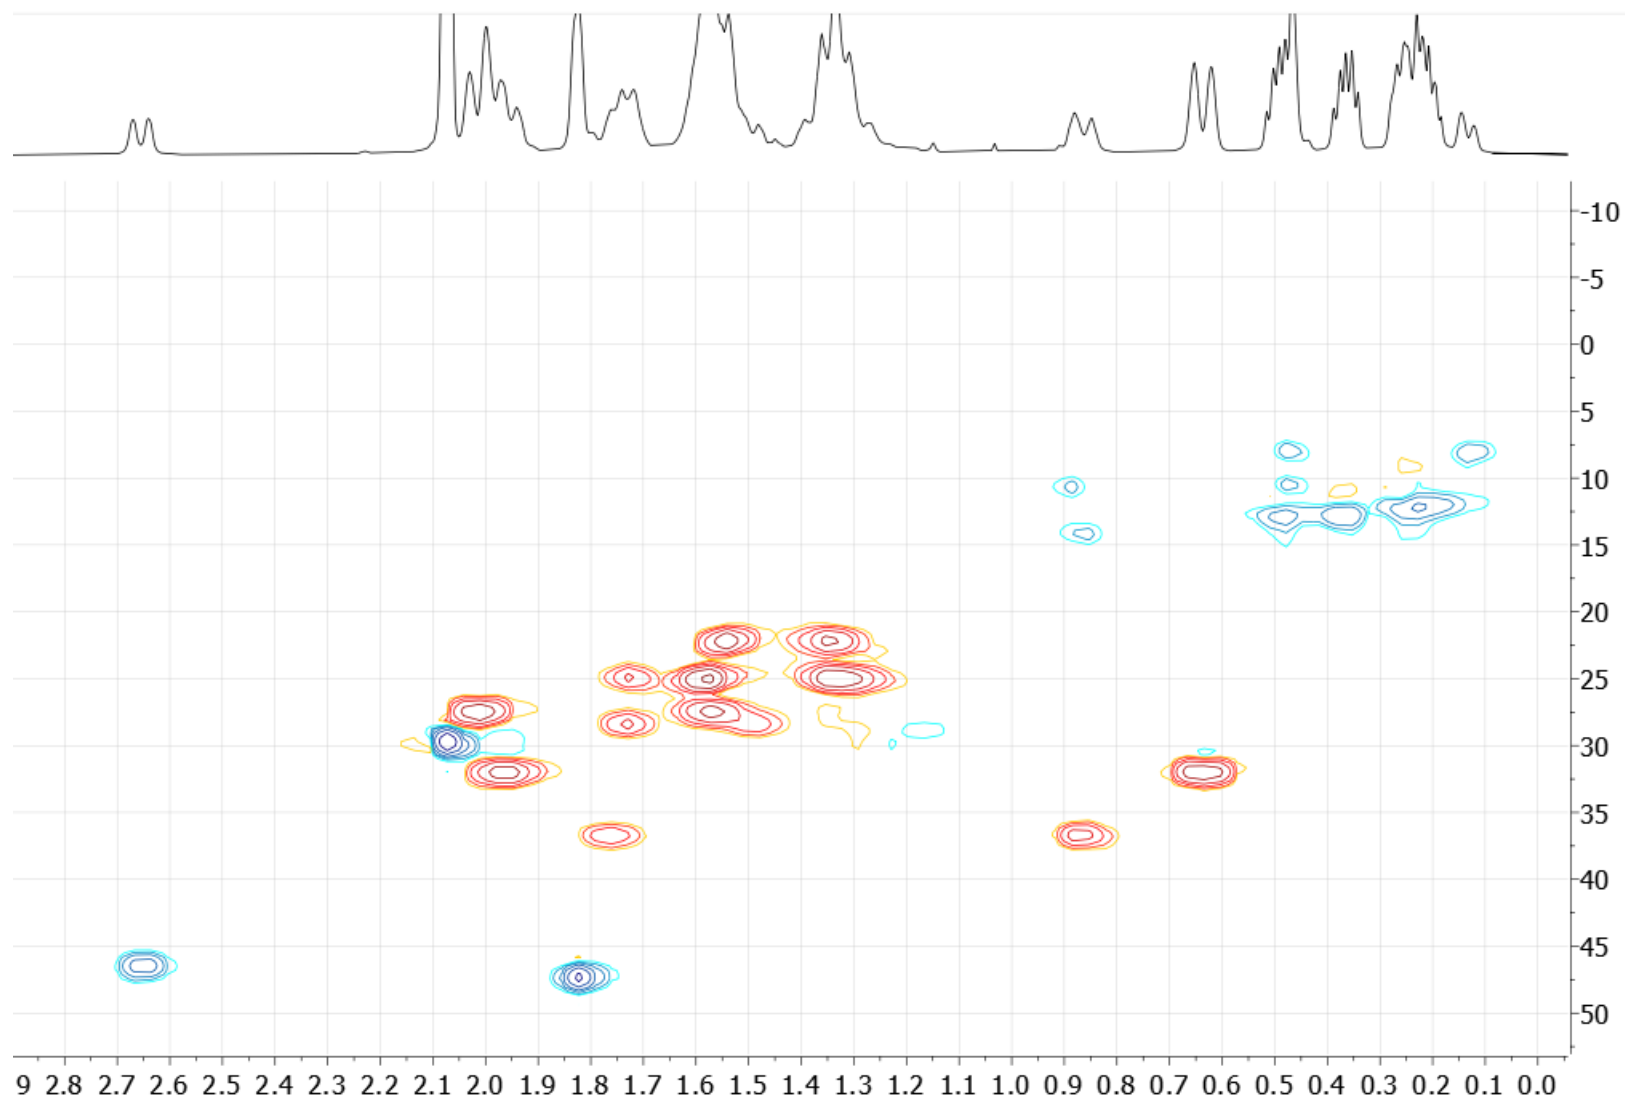

Compound **S8 1D NOE** (irradiation at 2.655 ppm, 400 MHz, *d*<sub>6</sub>-Acetone, -78 °C)

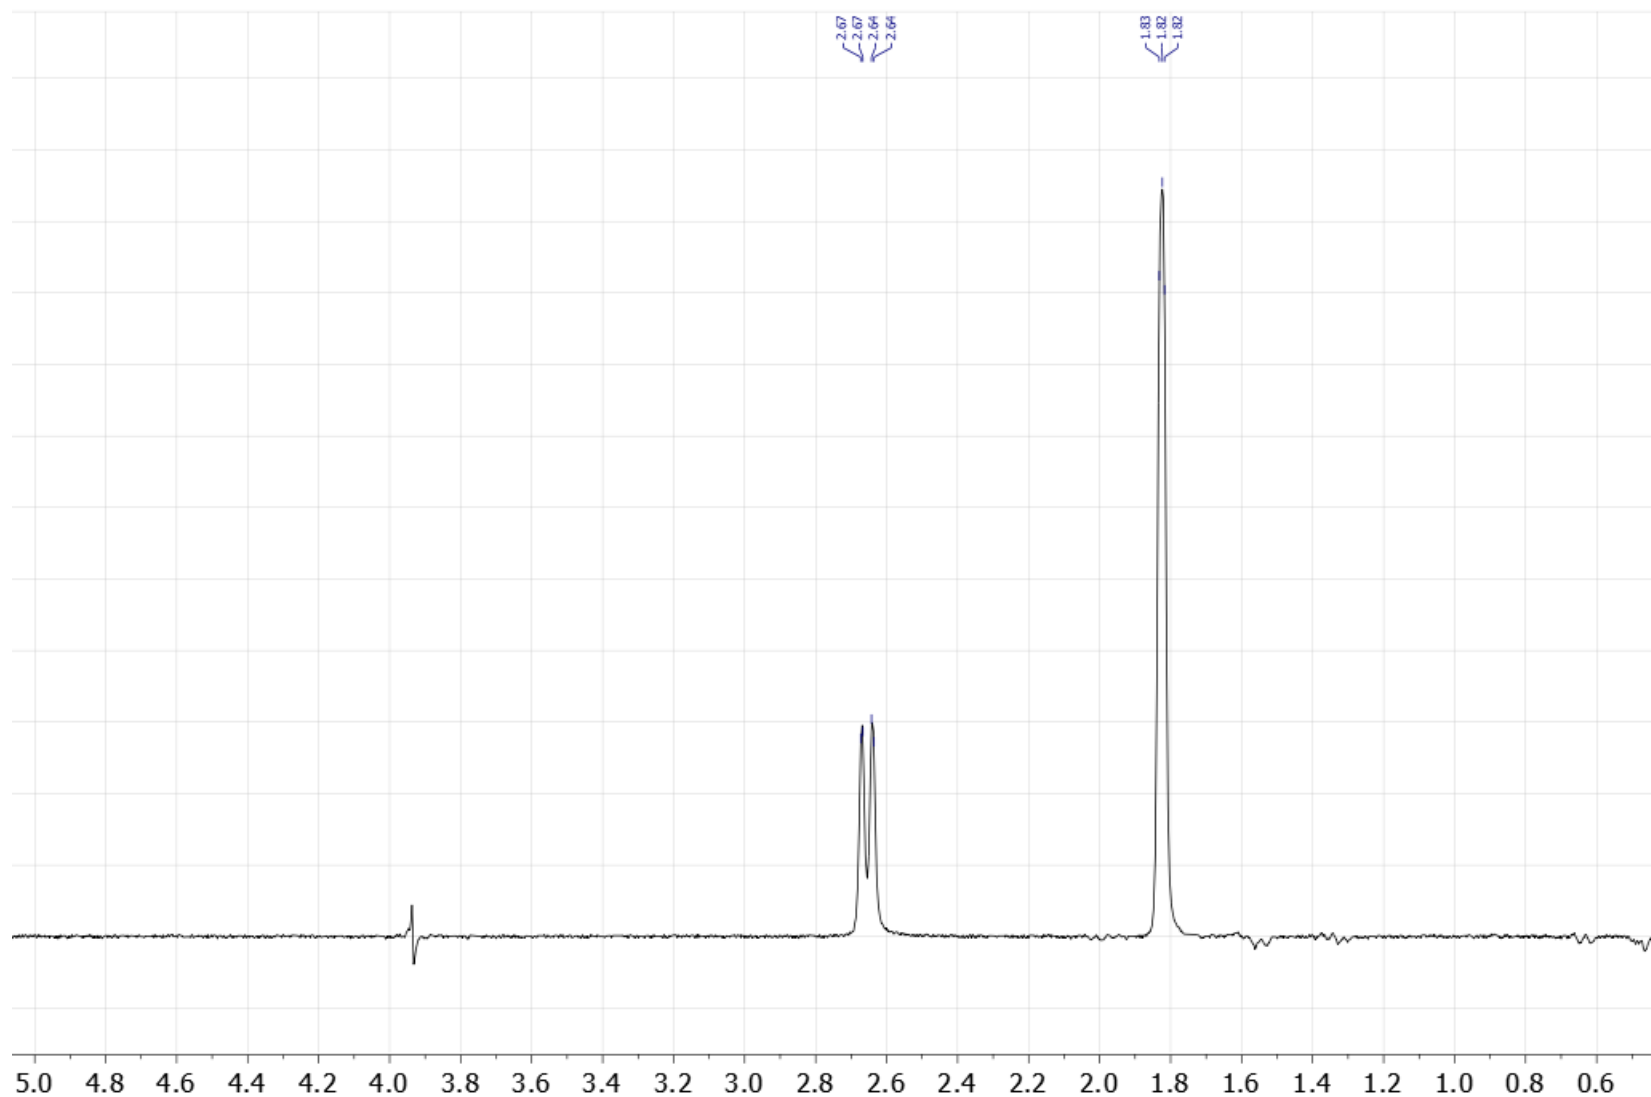

S131

Compound **S9**  $^1\text{H}$  NMR (400 MHz,  $d_6$ -Acetone,  $-78\text{ }^\circ\text{C}$ )

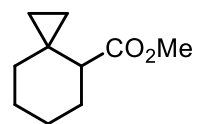

methyl spiro[2.5]octane-4-carboxylate

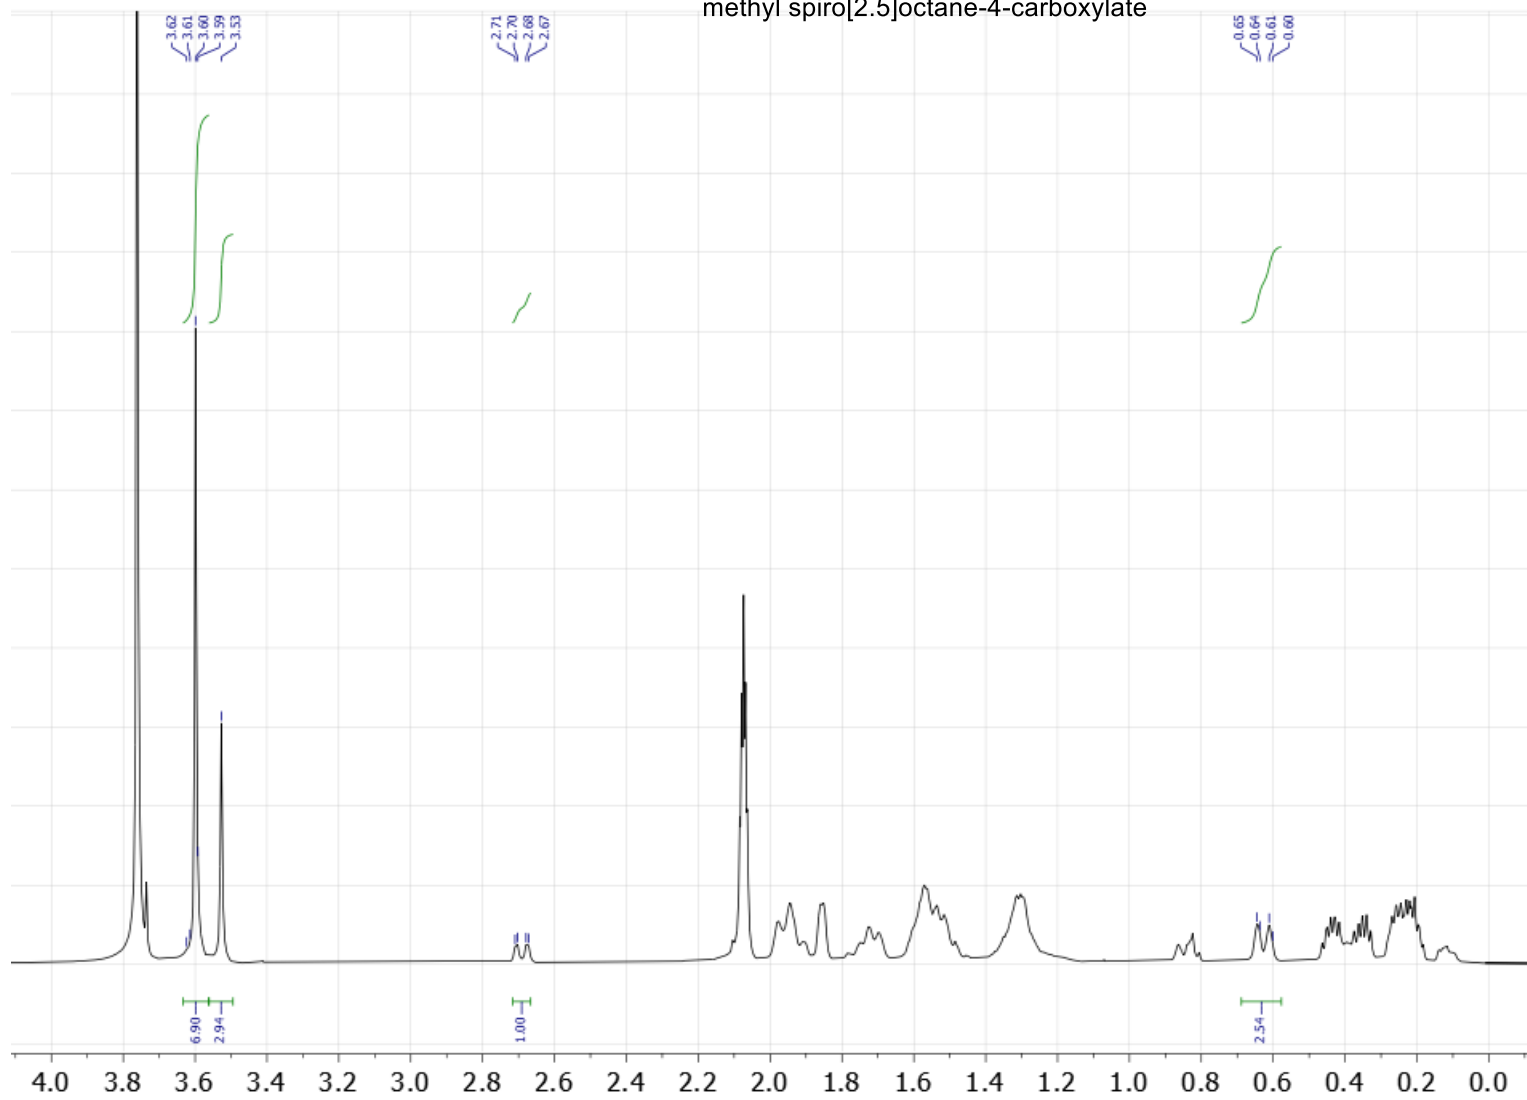

Compound **S9** HSQC (400 MHz, *d*<sub>6</sub>-Acetone, -78 °C)

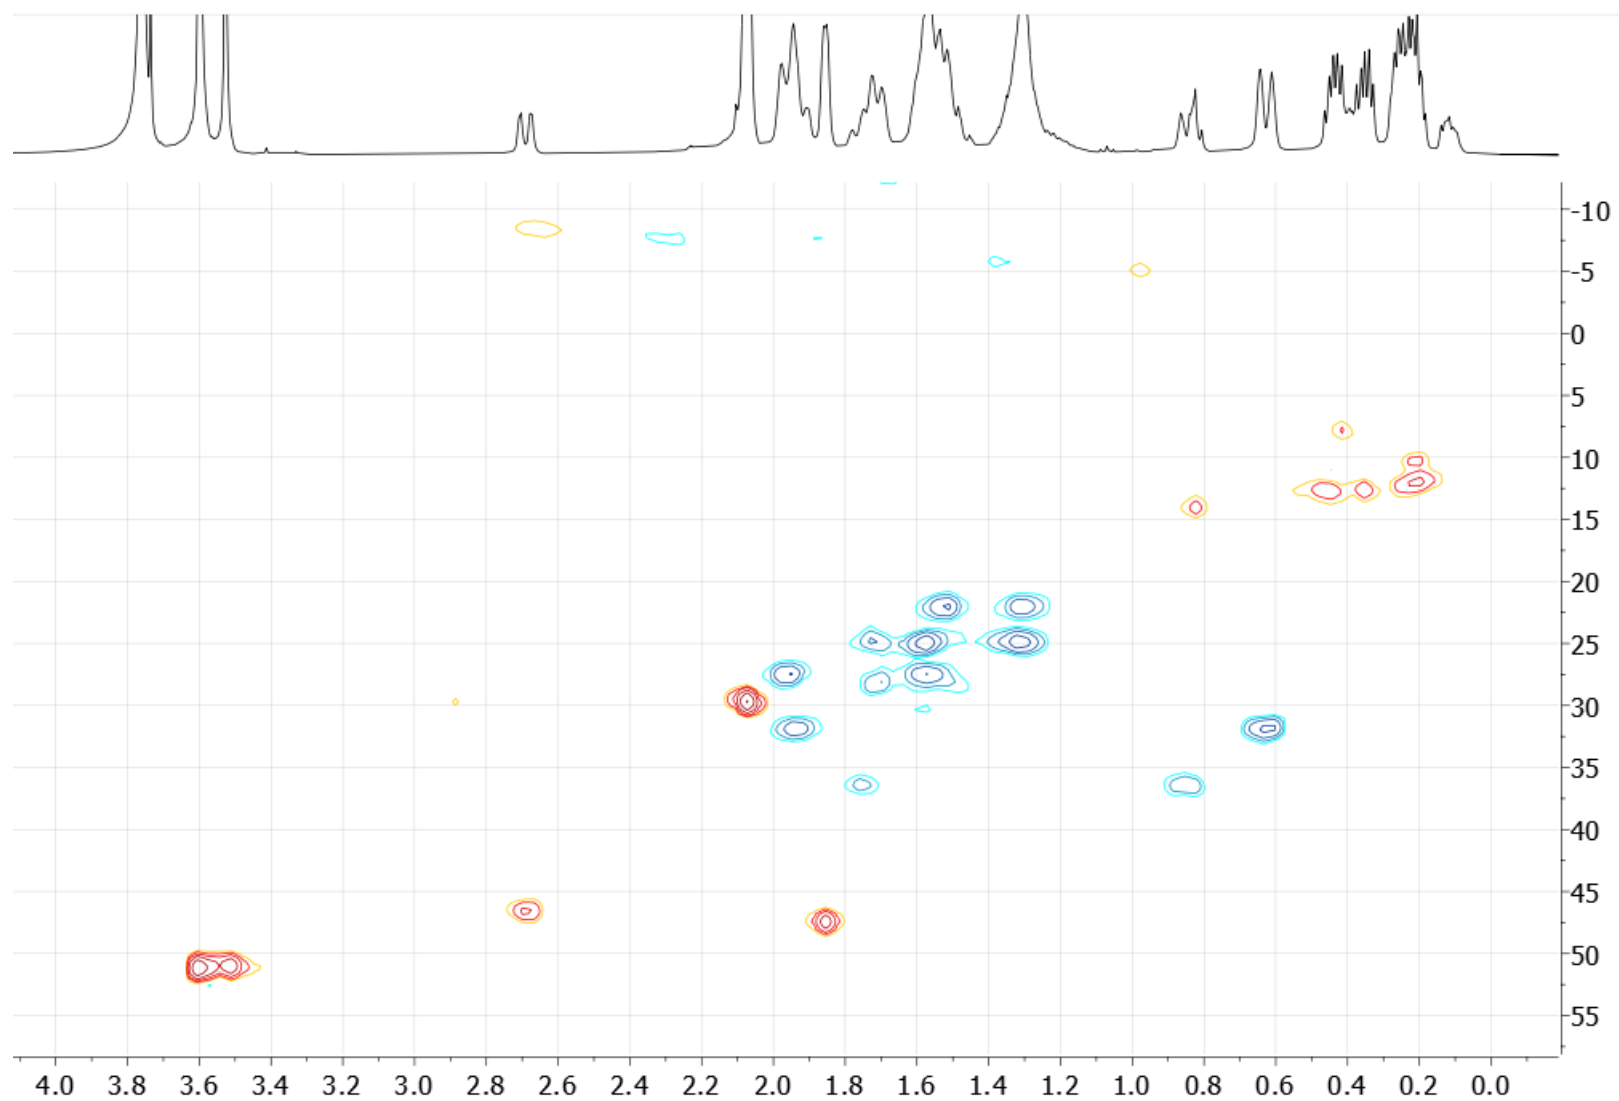

Compound **S9 1D NOE** (irradiation at 2.69 ppm, 400 MHz, *d*<sub>6</sub>-Acetone, -78 °C)

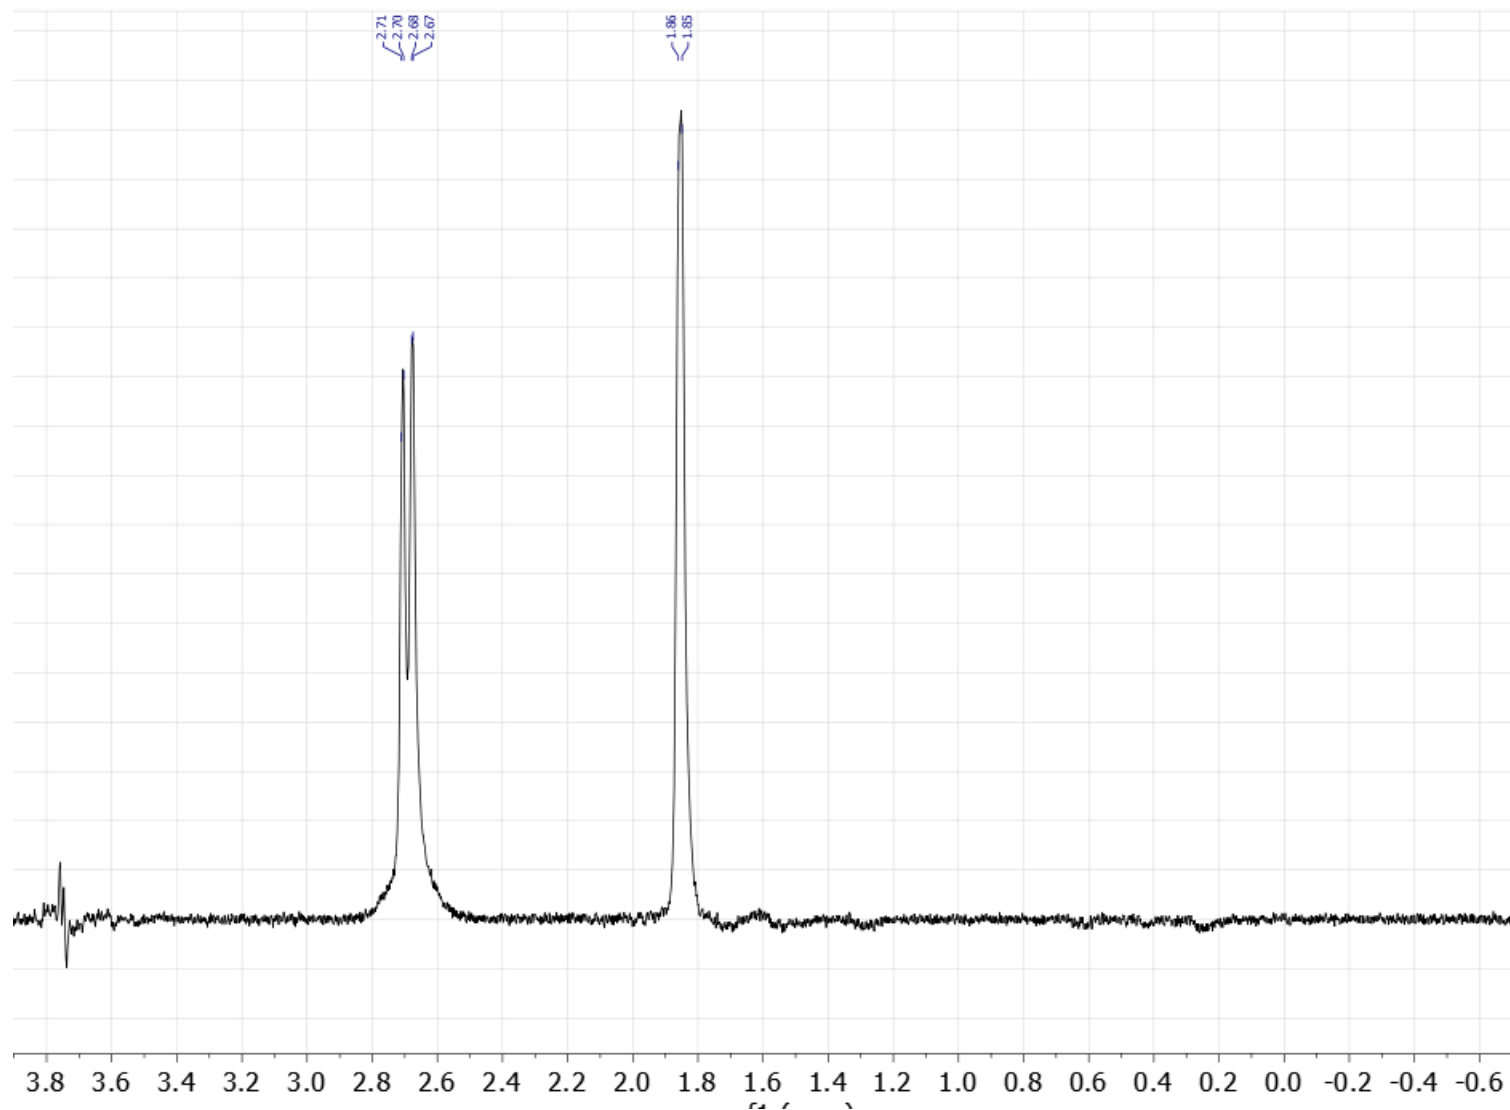

Compound **S10**  $^1\text{H}$  NMR (400 MHz,  $d_6$ -Acetone,  $-78\text{ }^\circ\text{C}$ )

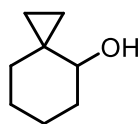

spiro[2.5]octan-4-ol

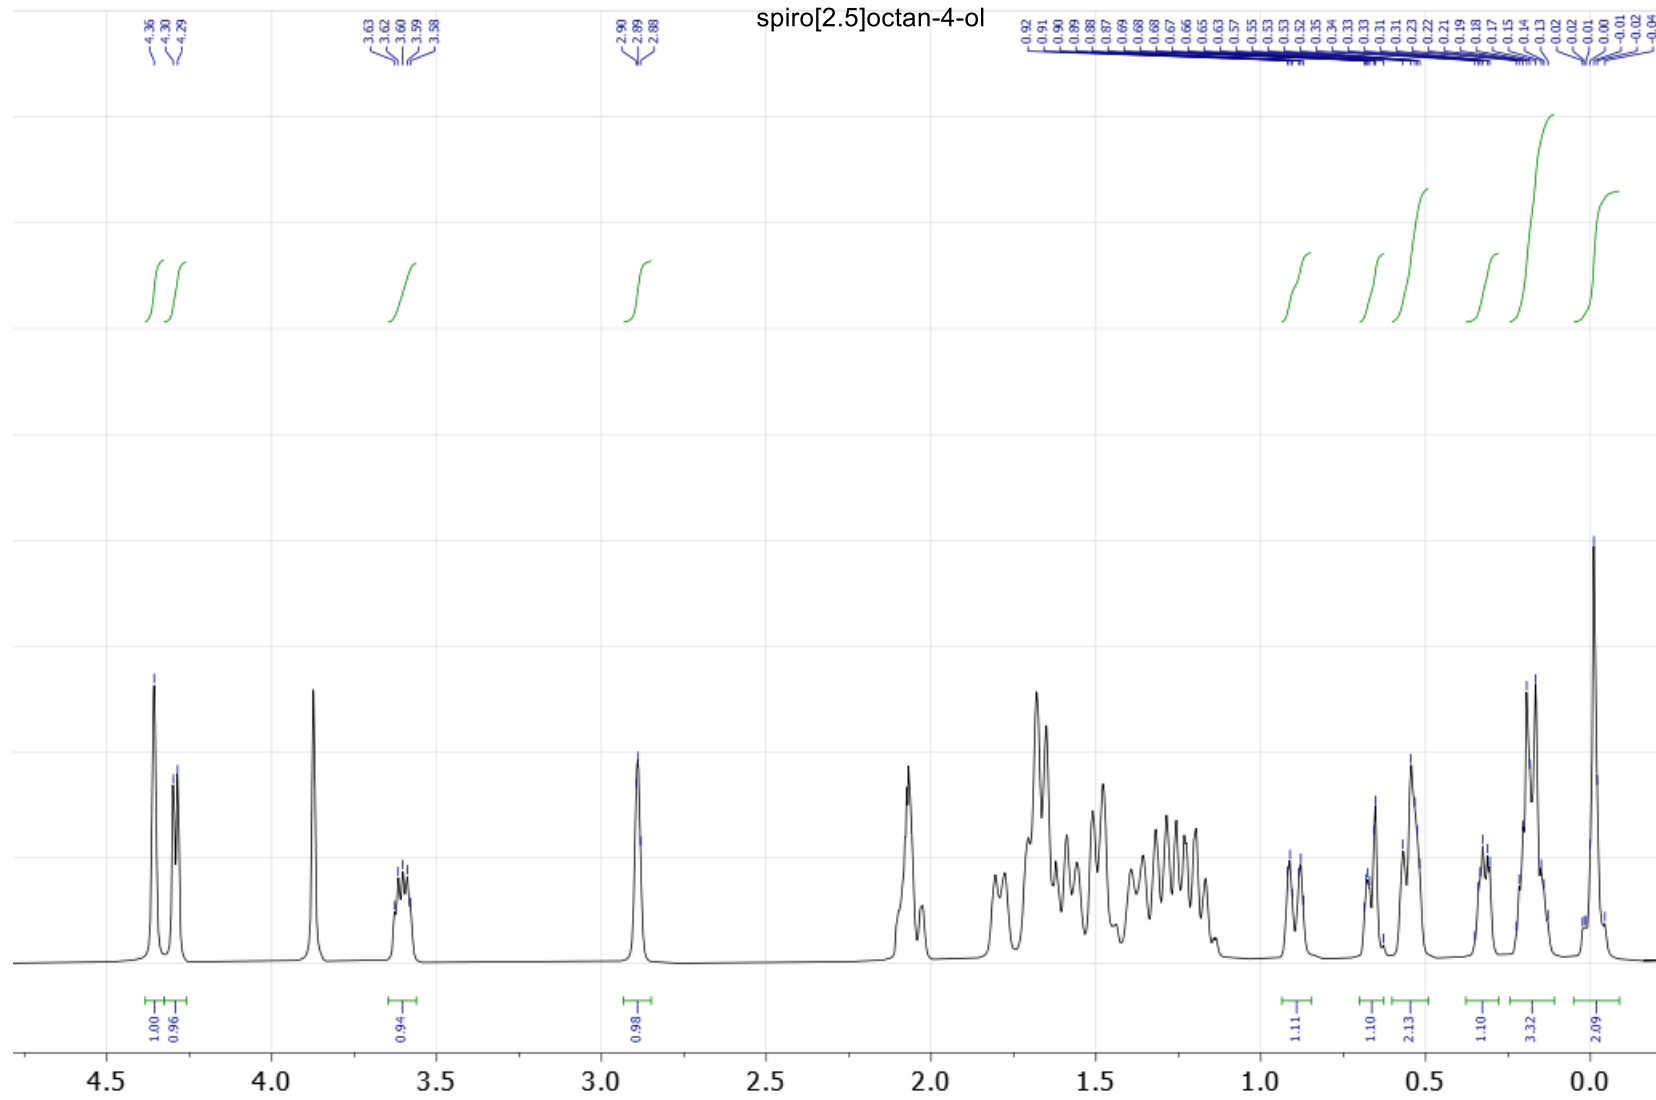

Compound **S10** HSQC (400 MHz, *d*<sub>6</sub>-Acetone, -78 °C)

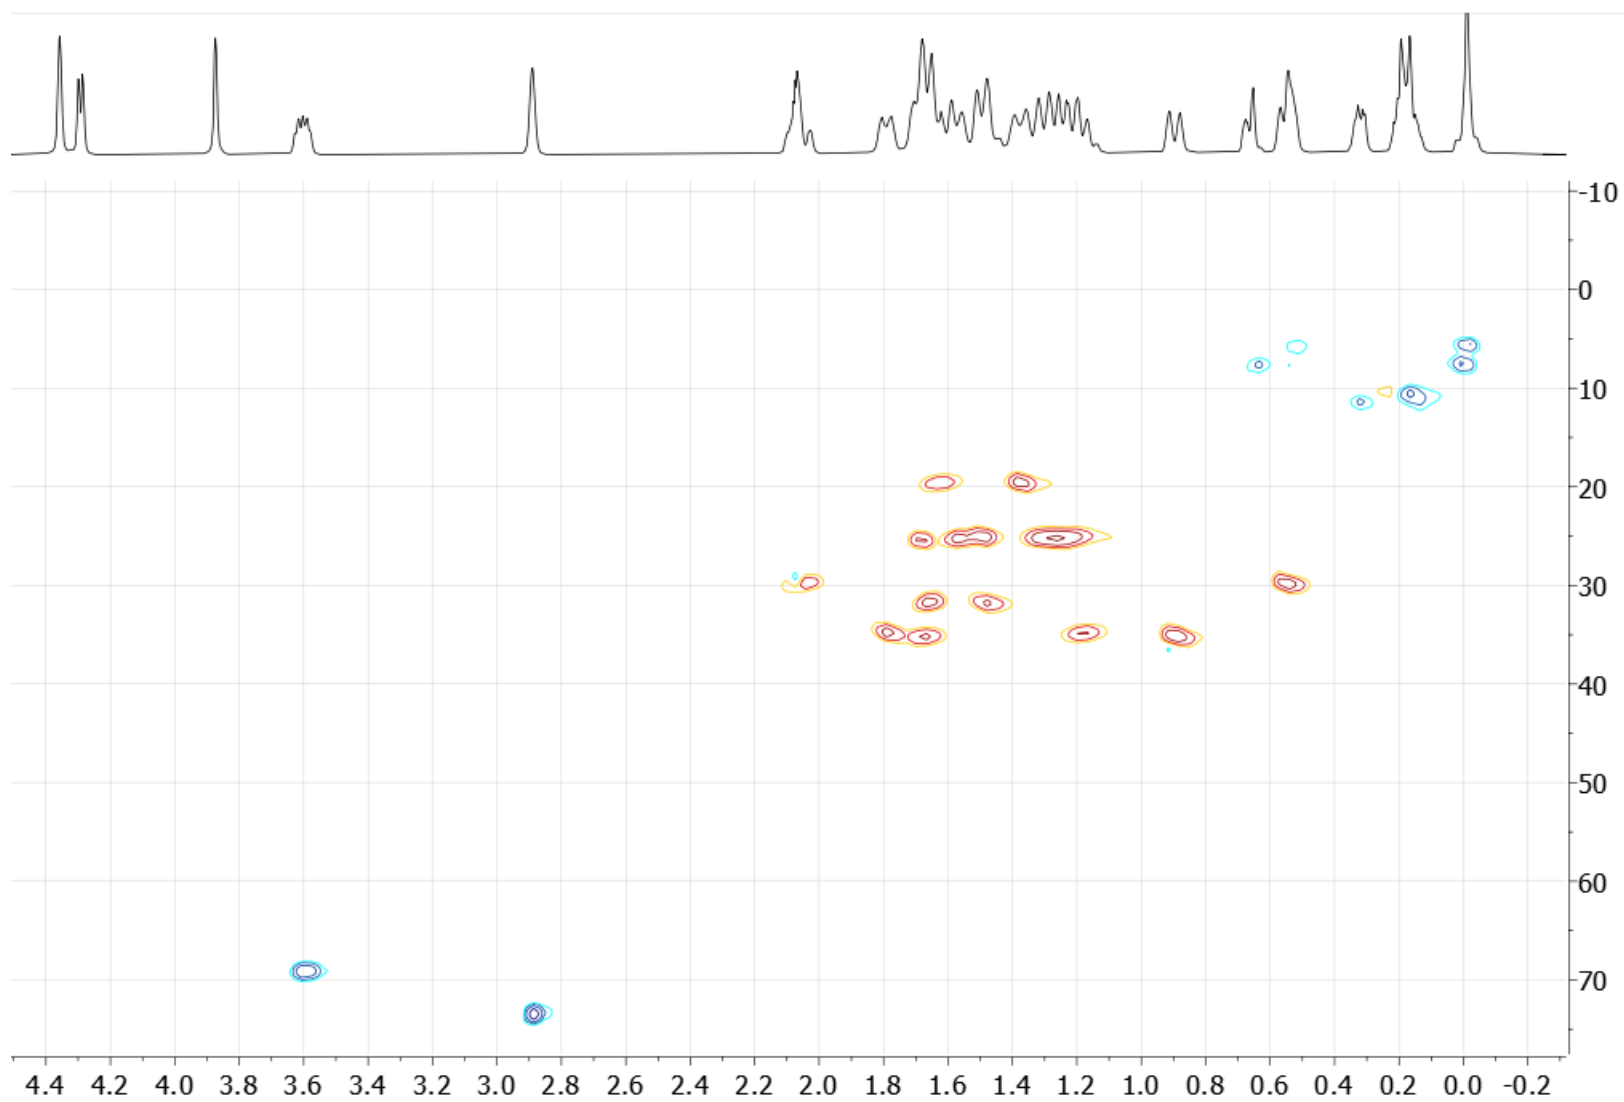



Compound **S10 1D NOE** (irradiation at 2.89 ppm, 400 MHz, *d*<sub>6</sub>-Acetone, -78 °C)

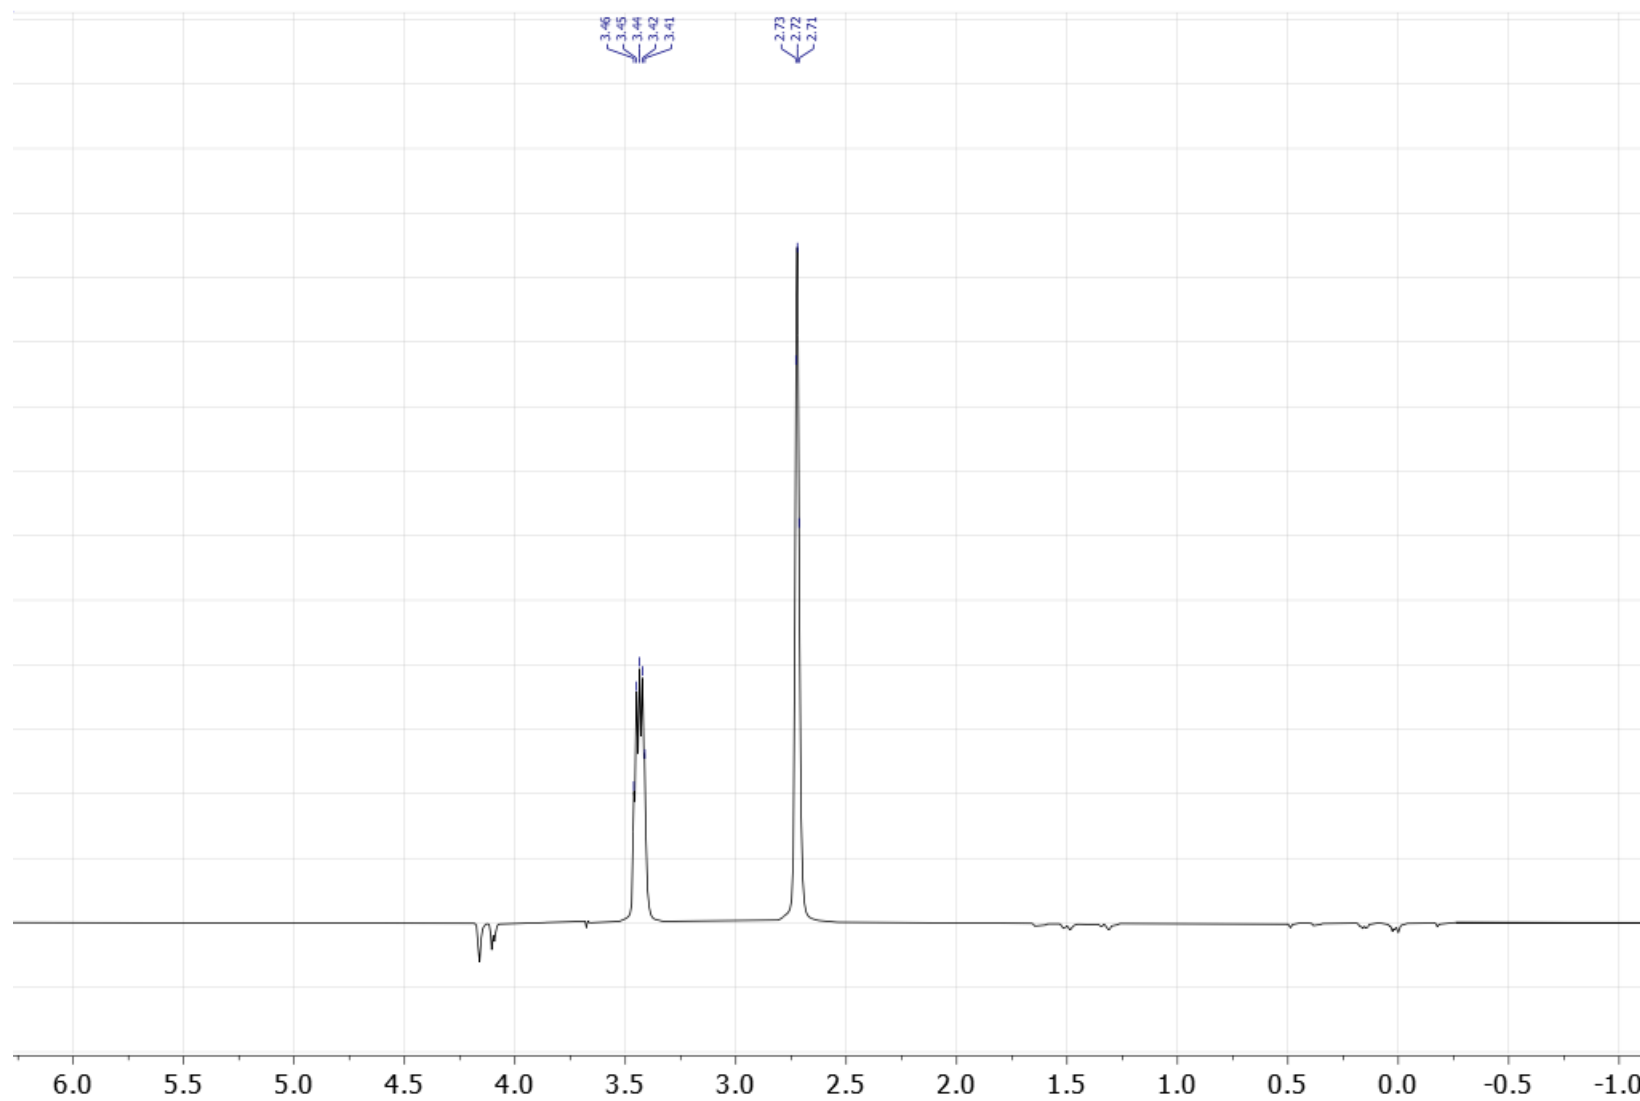

Compound **S11**  $^1\text{H}$  NMR (400 MHz,  $d_6$ -Acetone,  $-78\text{ }^\circ\text{C}$ )

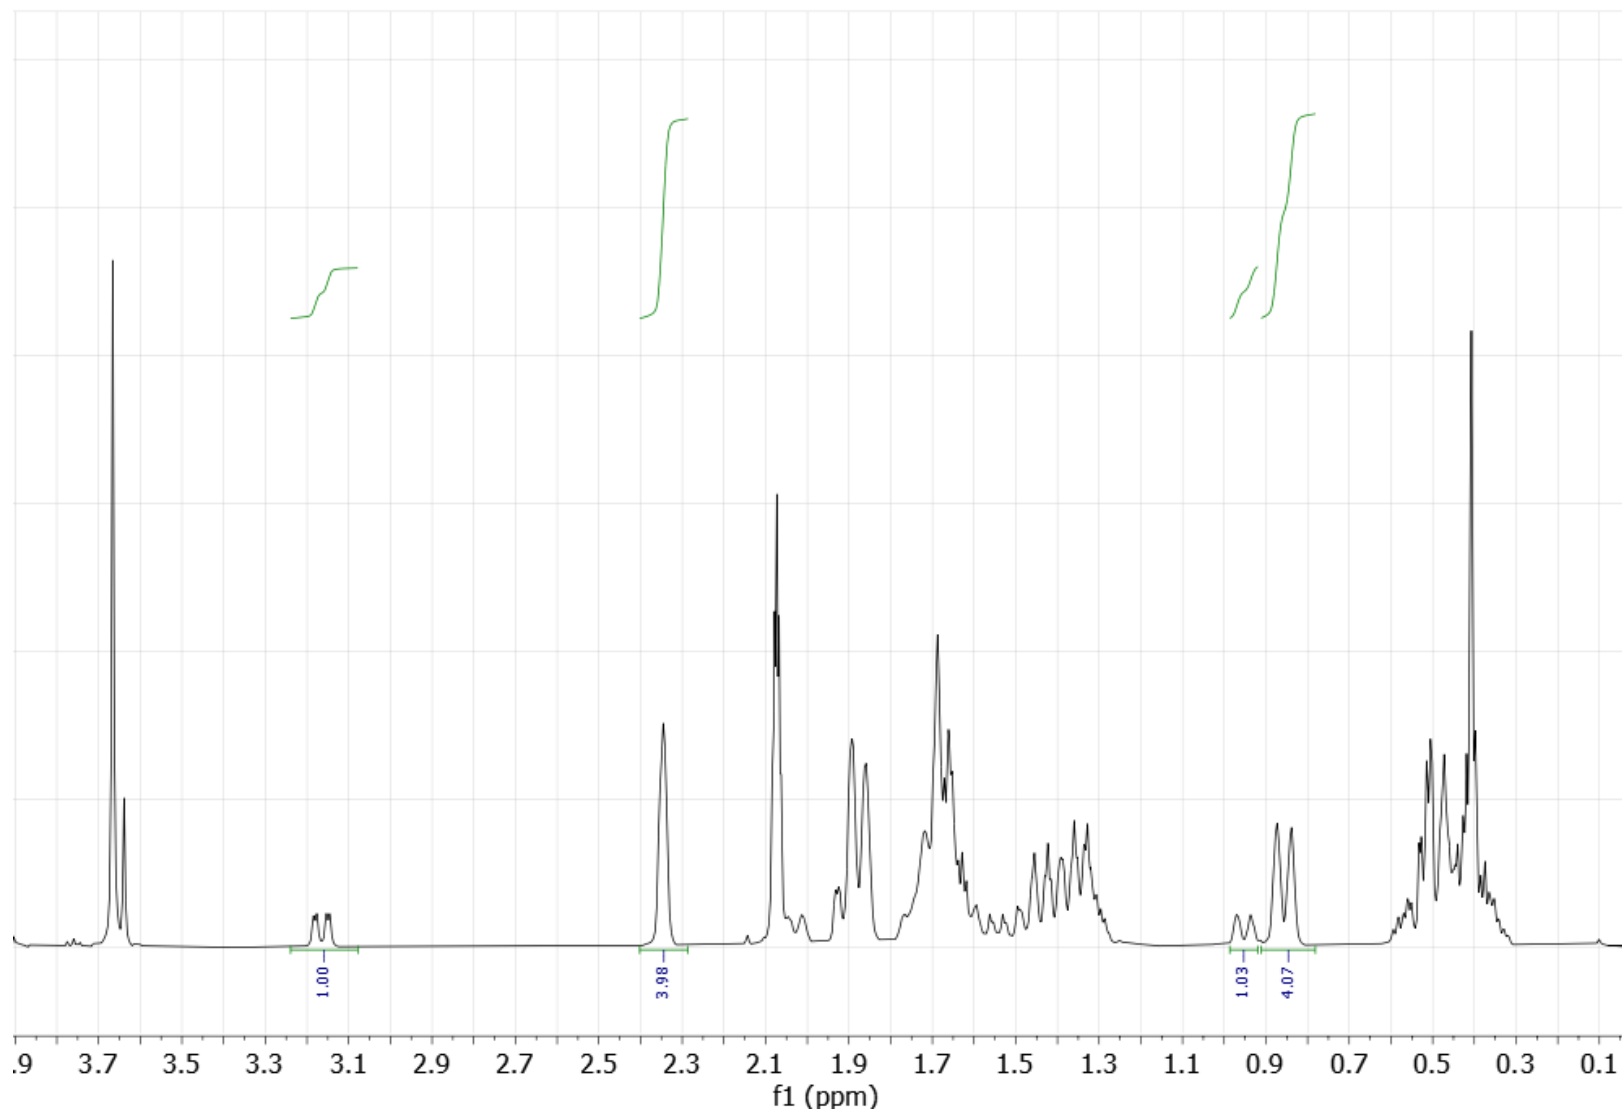

Compound **S11** COSY ( $d_6$ -Acetone,  $-78\text{ }^\circ\text{C}$ )

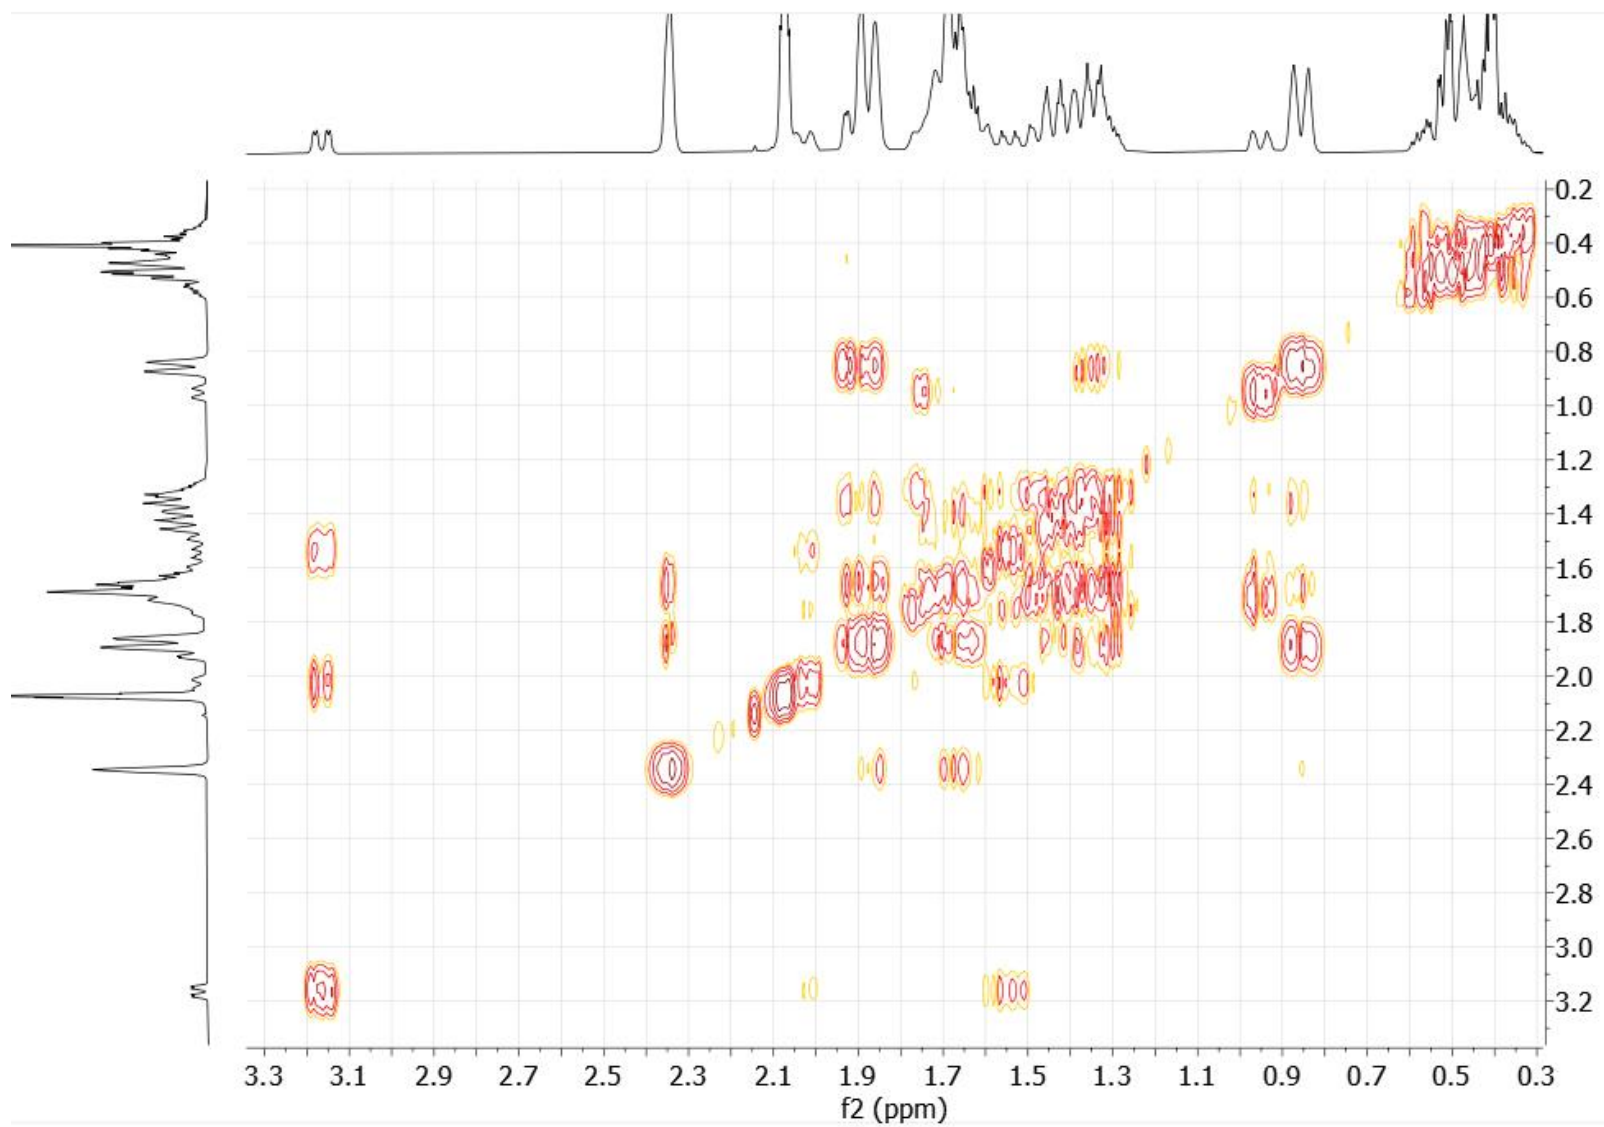

Compound **S11 1D-NOE** ( $d_6$ -Acetone,  $-78\text{ }^\circ\text{C}$ , irradiation at 3.167 ppm)

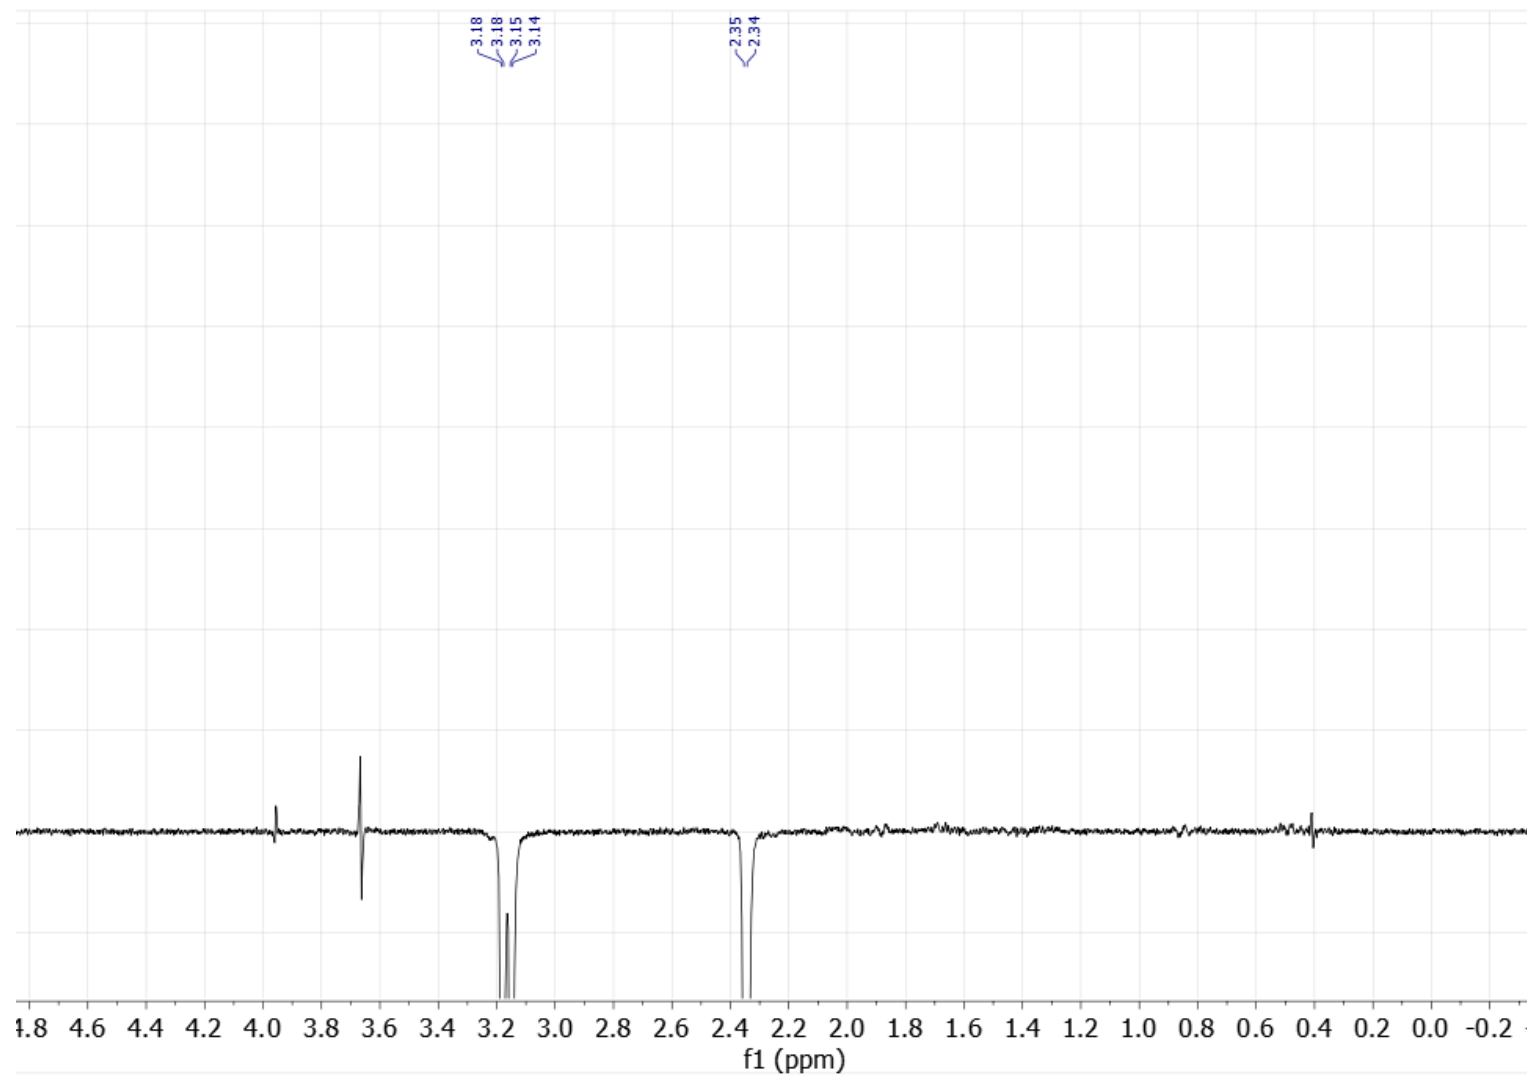

Compound **S12**  $^1\text{H}$  NMR (400 MHz,  $d_6$ -Acetone,  $-78\text{ }^\circ\text{C}$ )

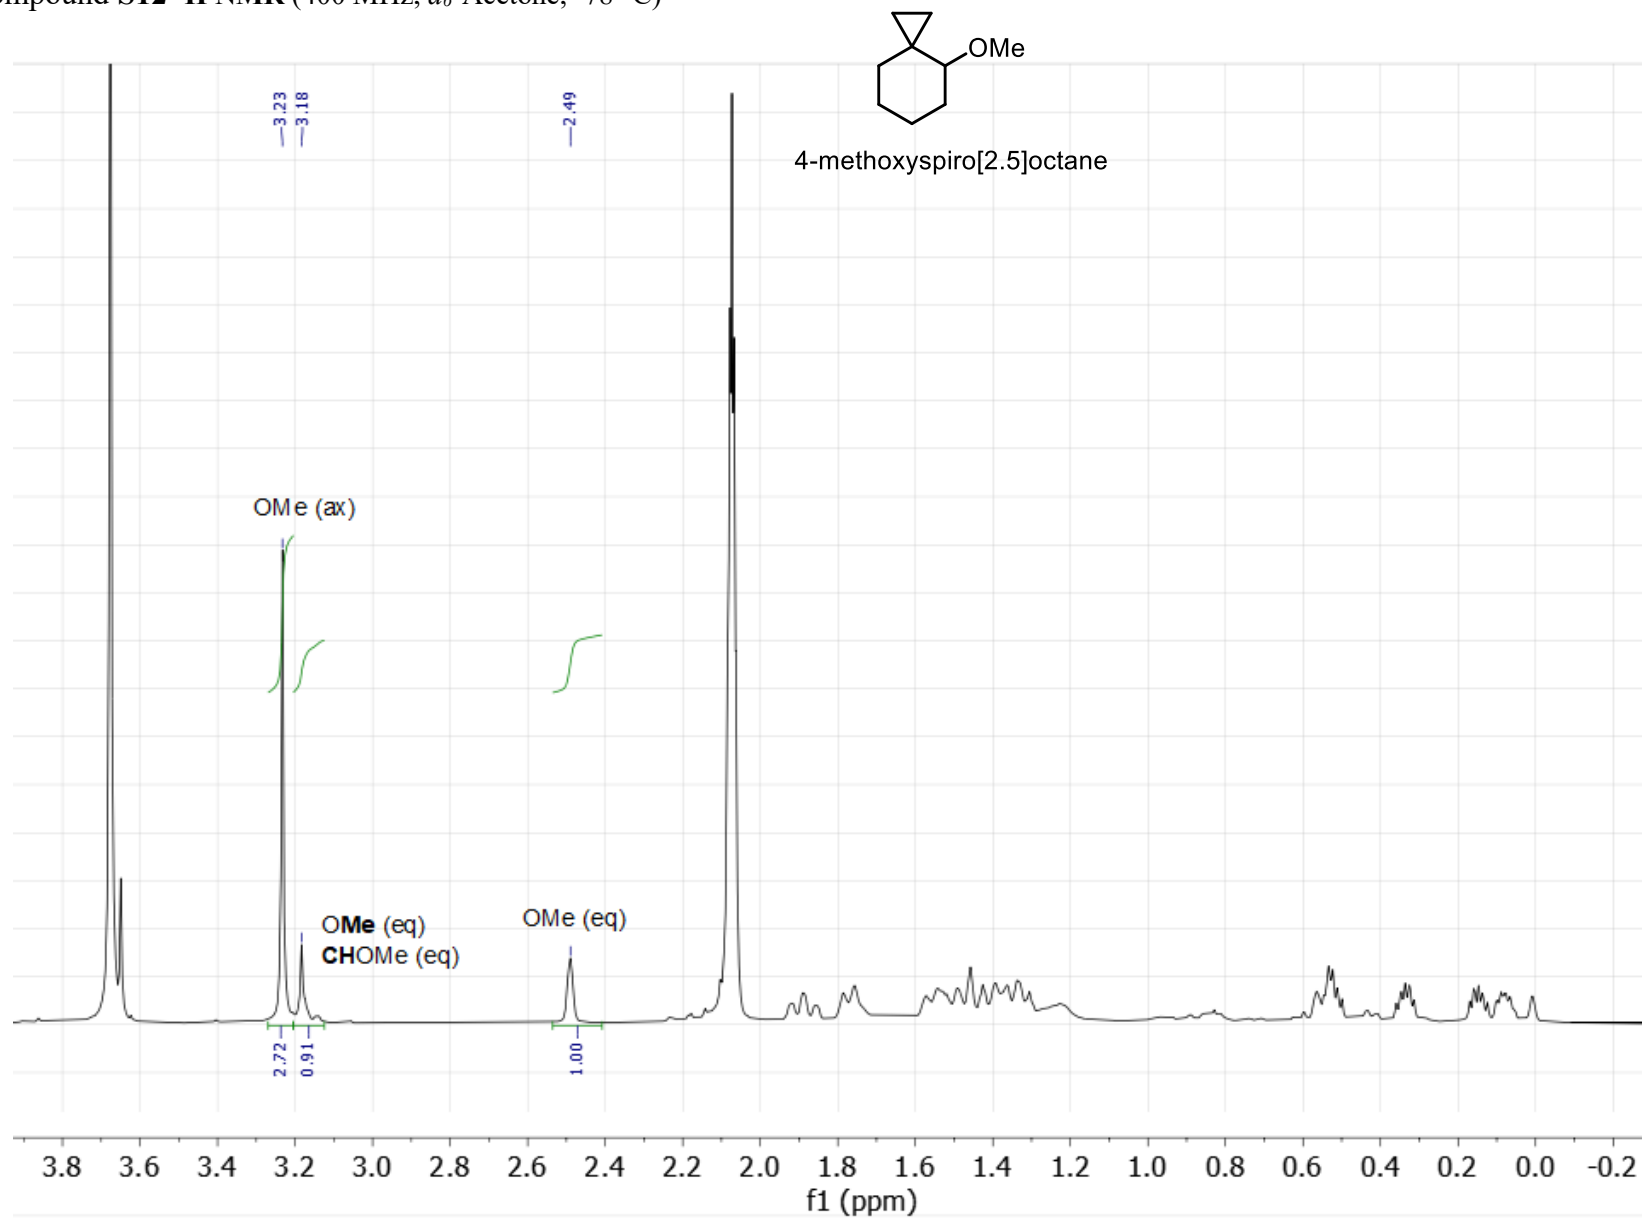

Compound **S12 1D-NOE** (400 MHz, *d*<sub>6</sub>-Acetone, -78 °C, irradiation at 2.5 ppm)

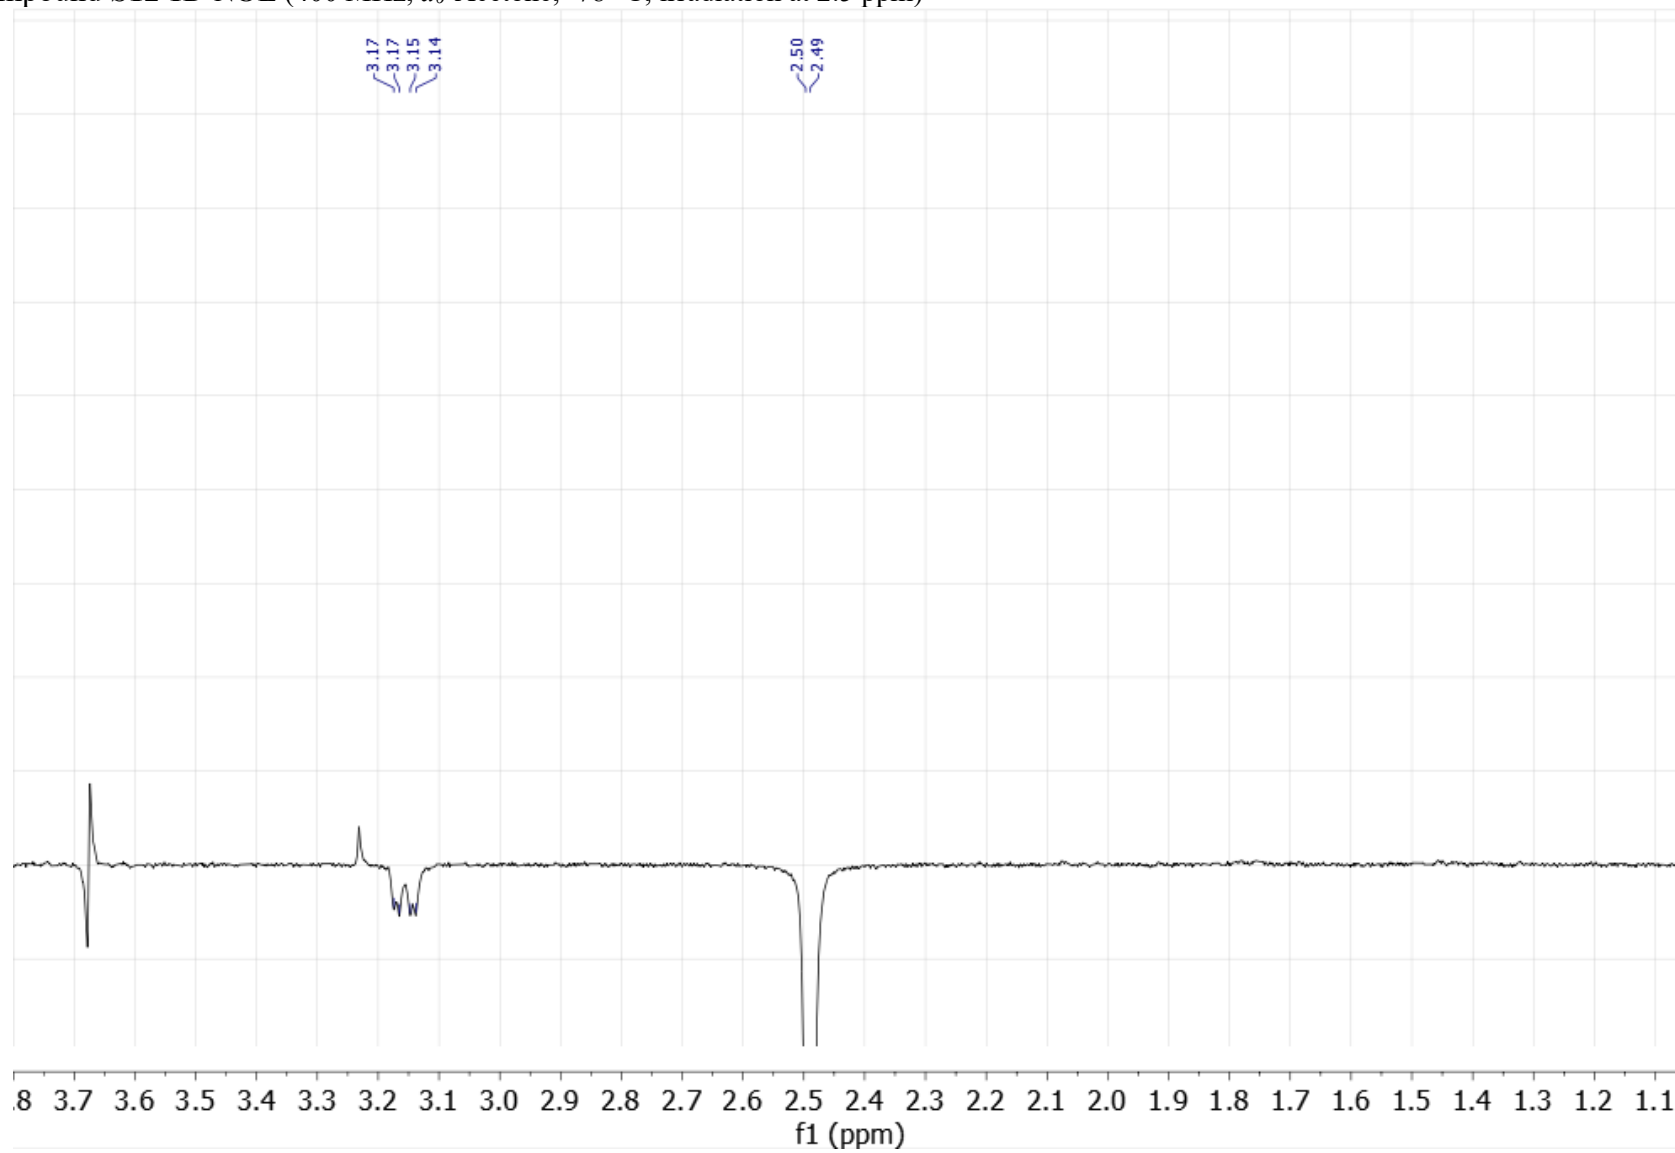

Compound **S13**  $^1\text{H}$  NMR (400 MHz,  $d_6$ -Acetone,  $-78\text{ }^\circ\text{C}$ )

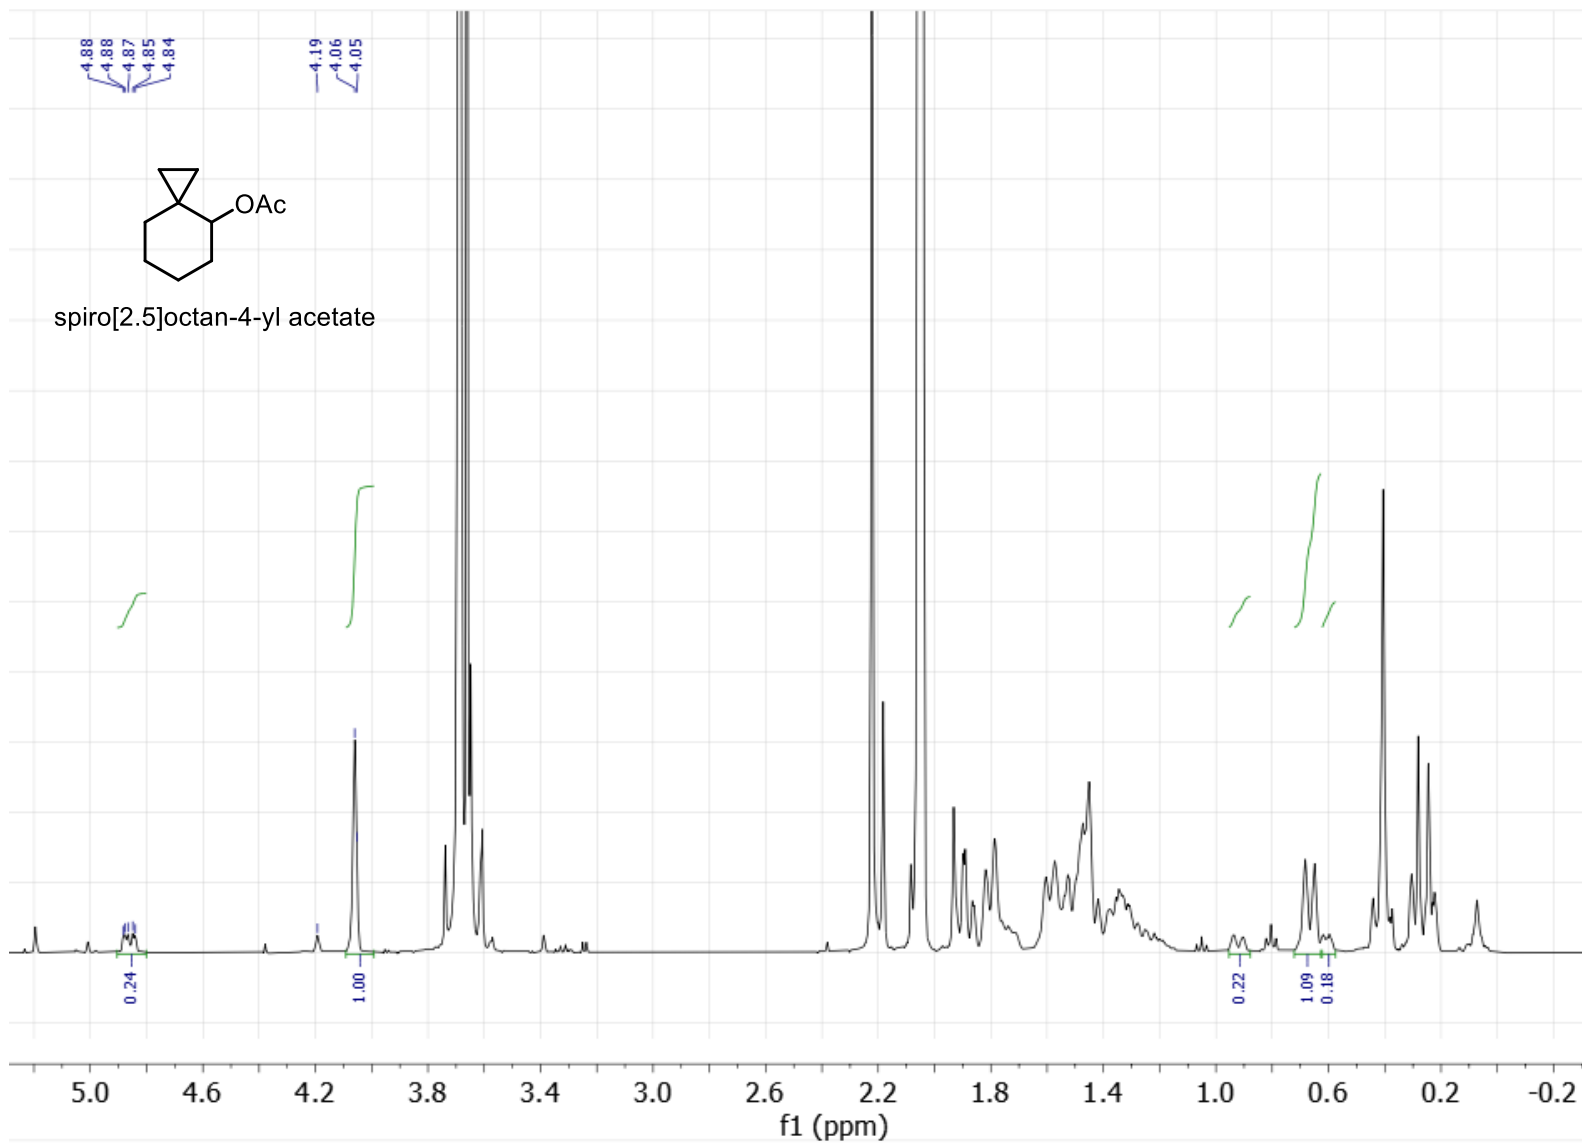

Compound **S13 1D-NOE** (400 MHz, *d*<sub>6</sub>-Acetone, -78 °C, irradiation at 4.07 ppm)

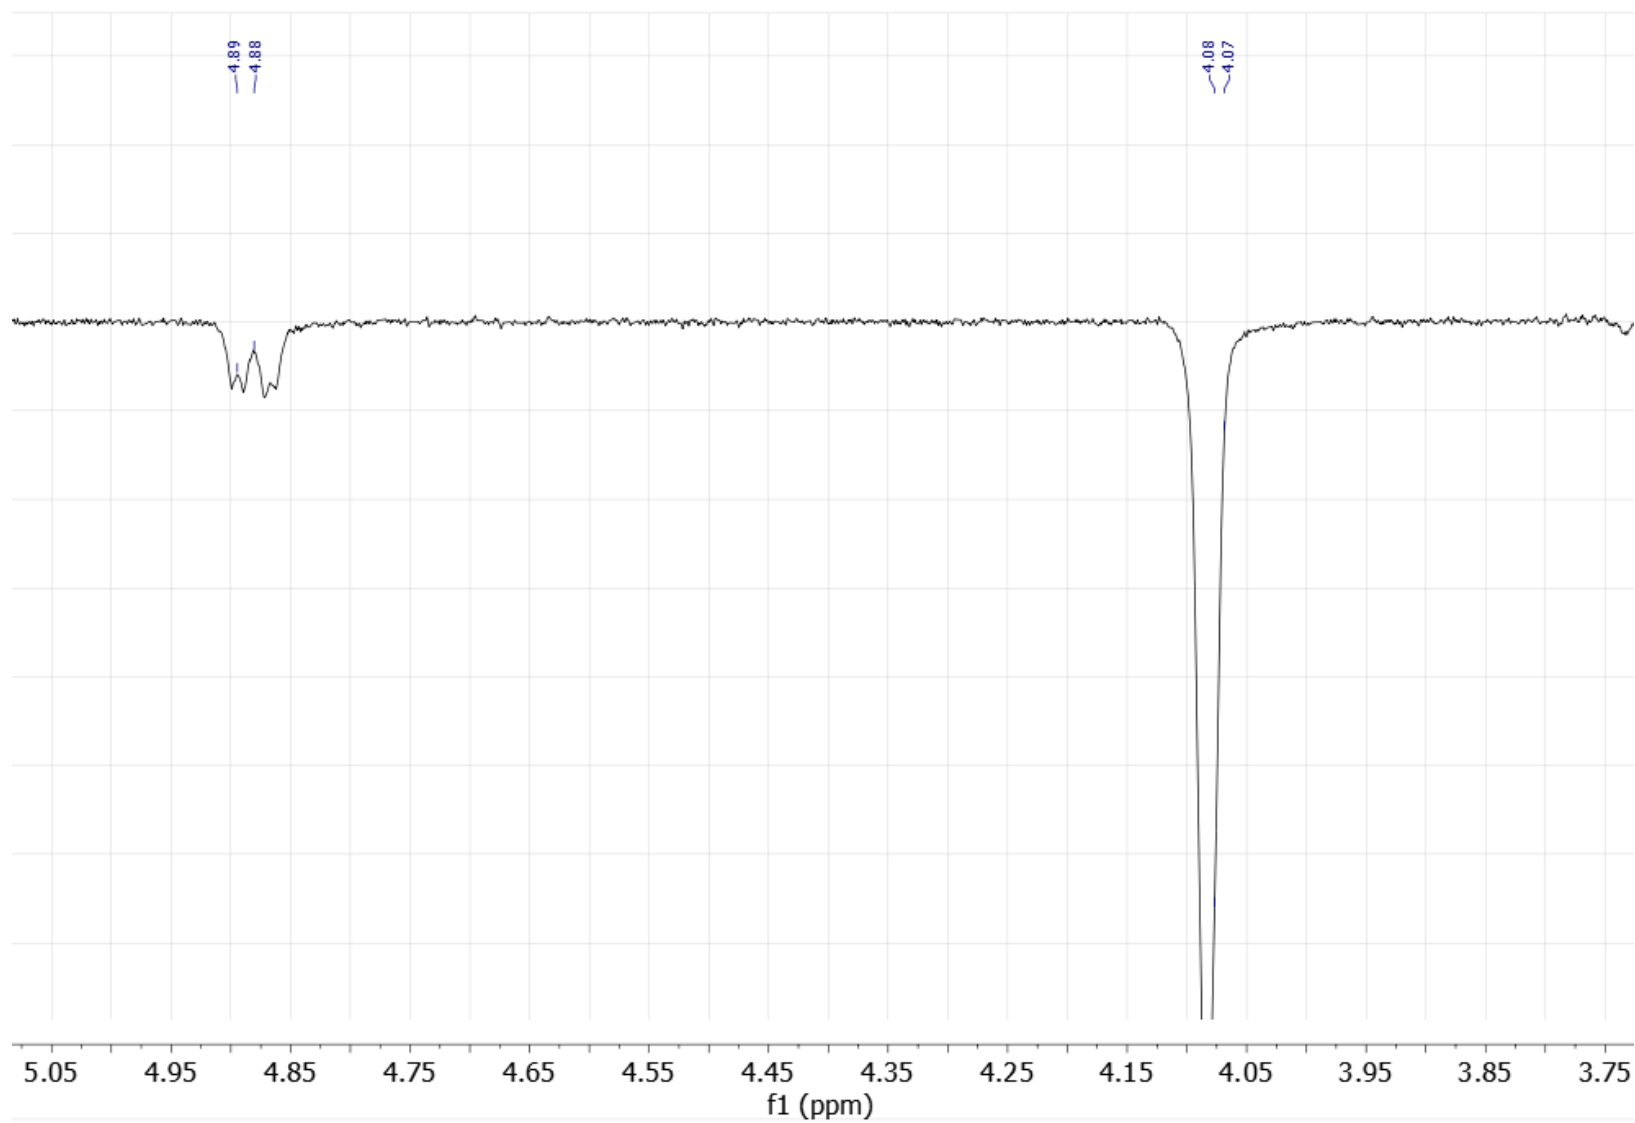



Compound **S14**  $^1\text{H}$  NMR (400 MHz,  $d_6$ -Acetone,  $-78\text{ }^\circ\text{C}$ )

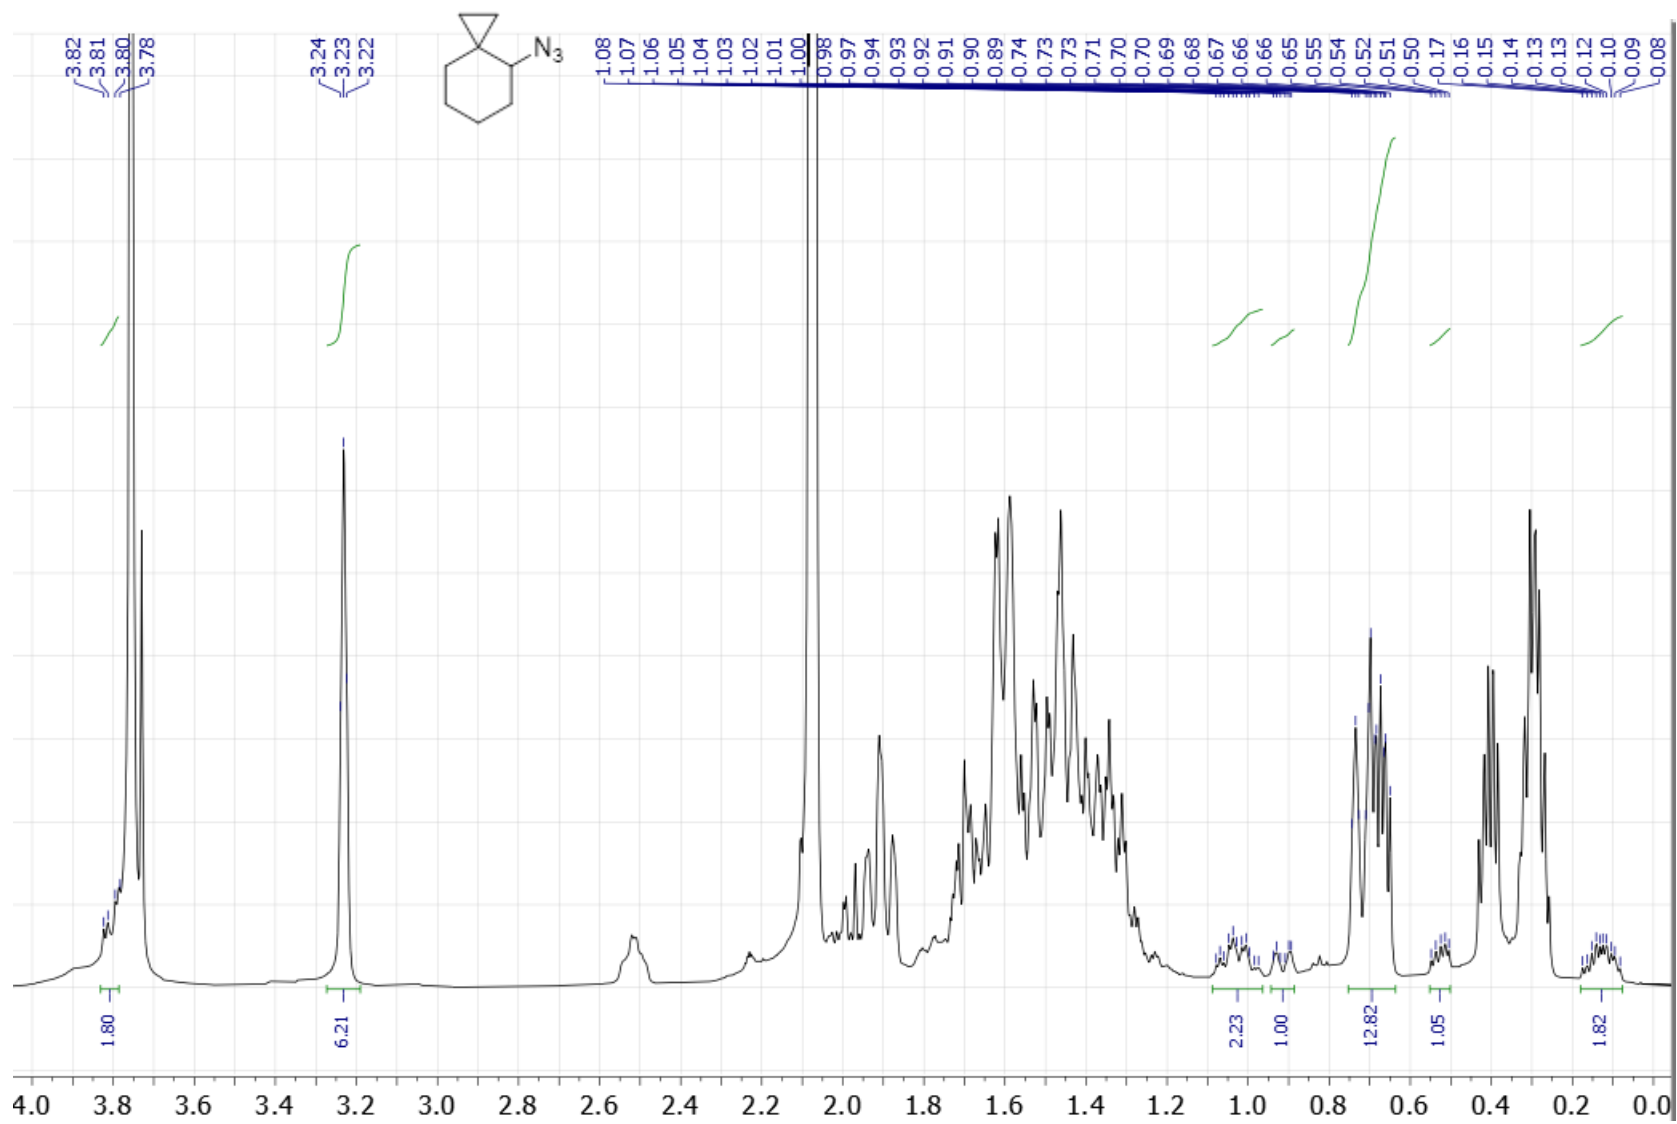

S145

Compound **S14** HSQC (400 MHz, *d*<sub>6</sub>-Acetone, -78 °C)

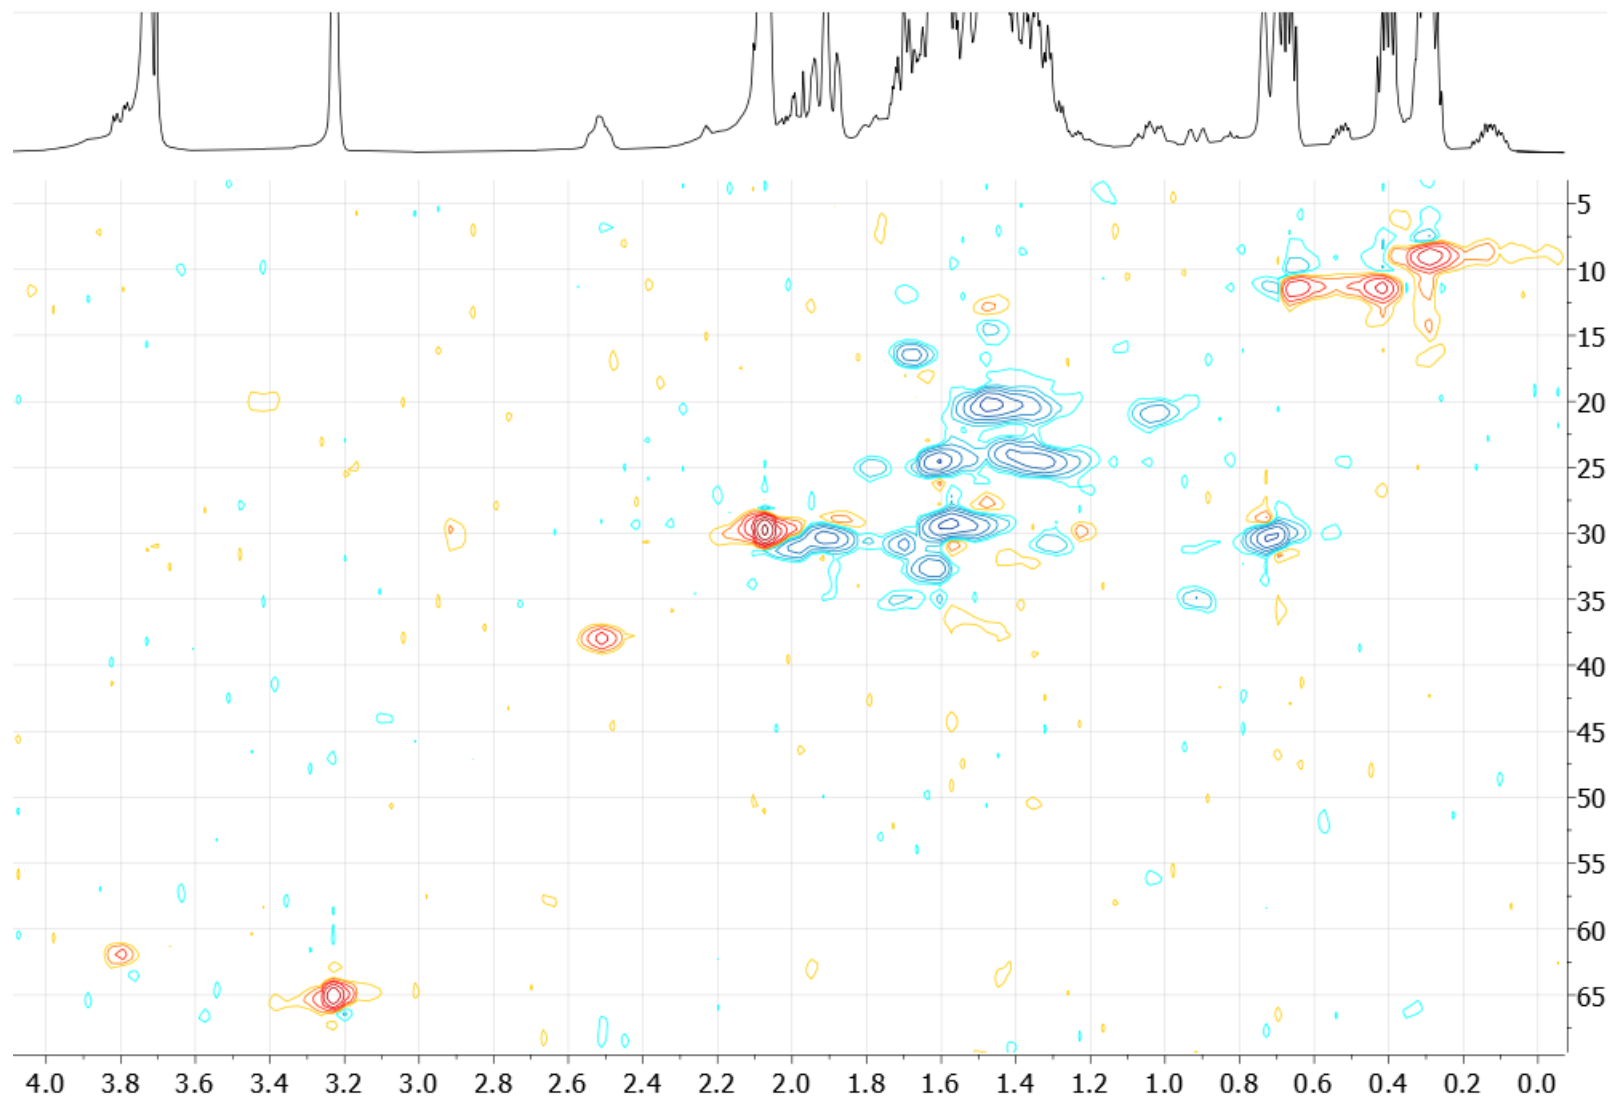

Compound **S14 1D NOE** (irradiation at 3.24 ppm, 400 MHz, *d*<sub>6</sub>-Acetone, -78 °C)

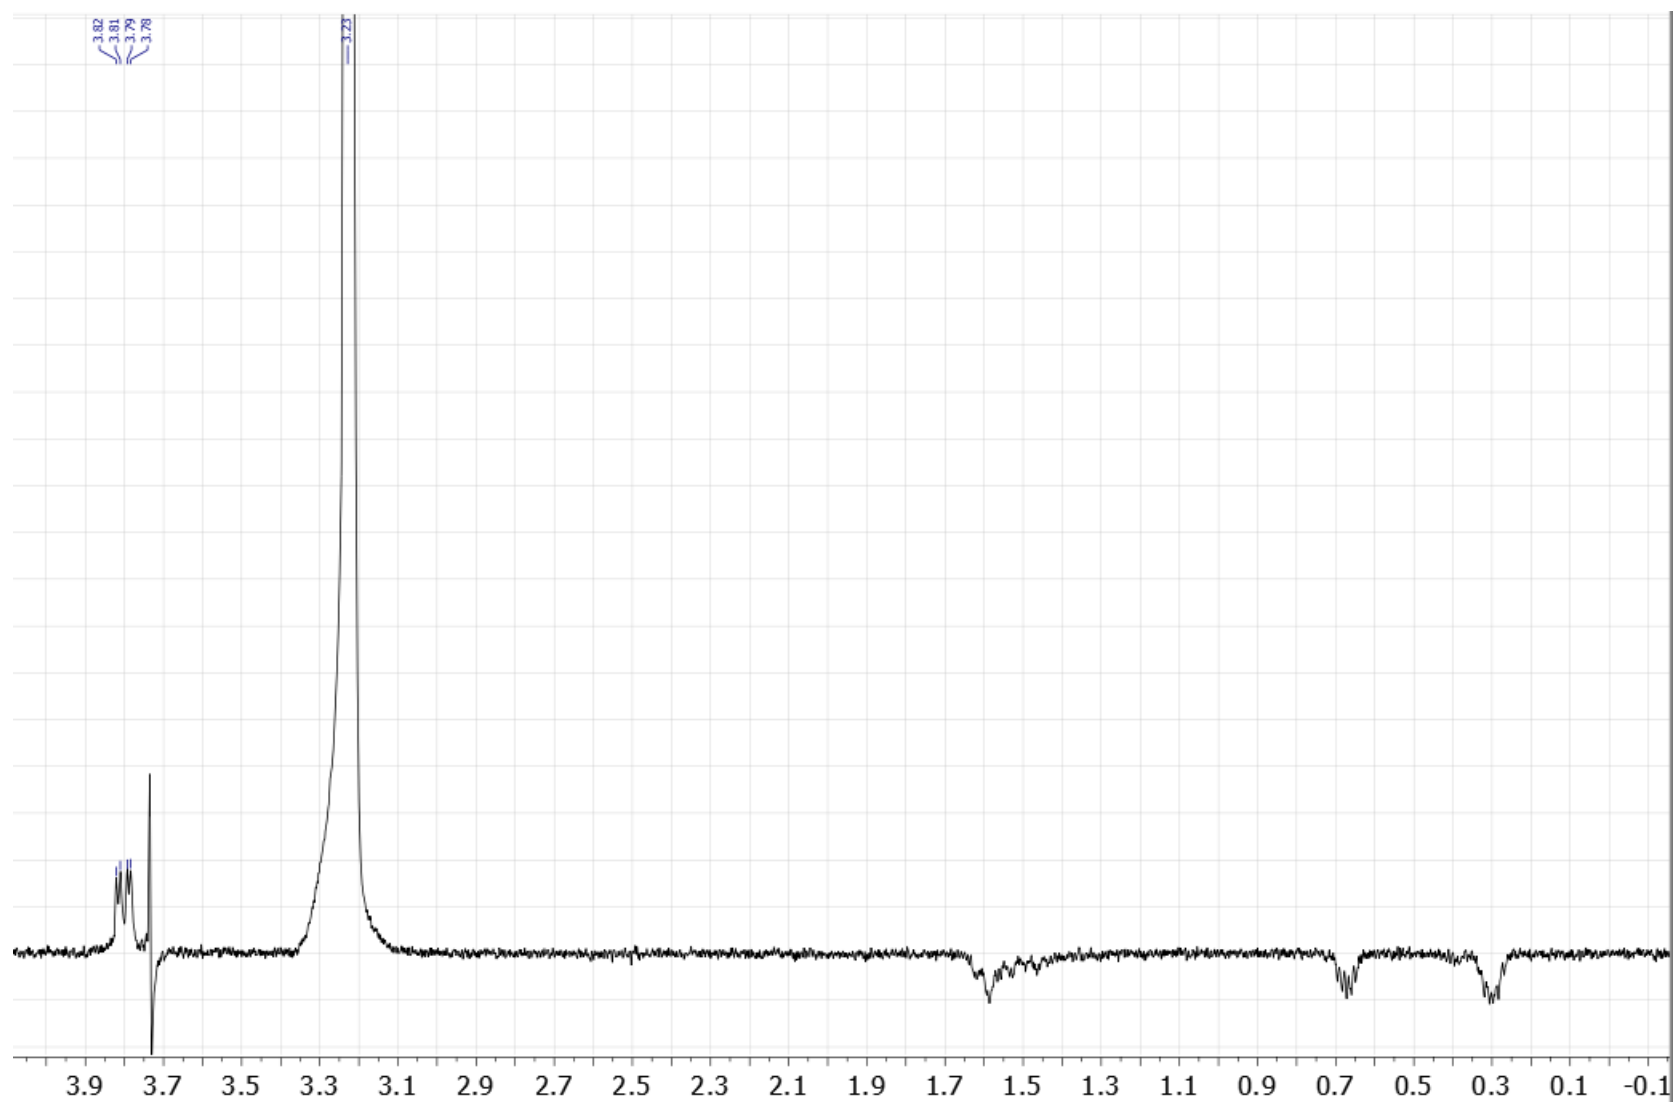

Compound **S14 1D NOE** (irradiation at 0.40 ppm, 400 MHz, *d*<sub>6</sub>-Acetone, -78 °C)

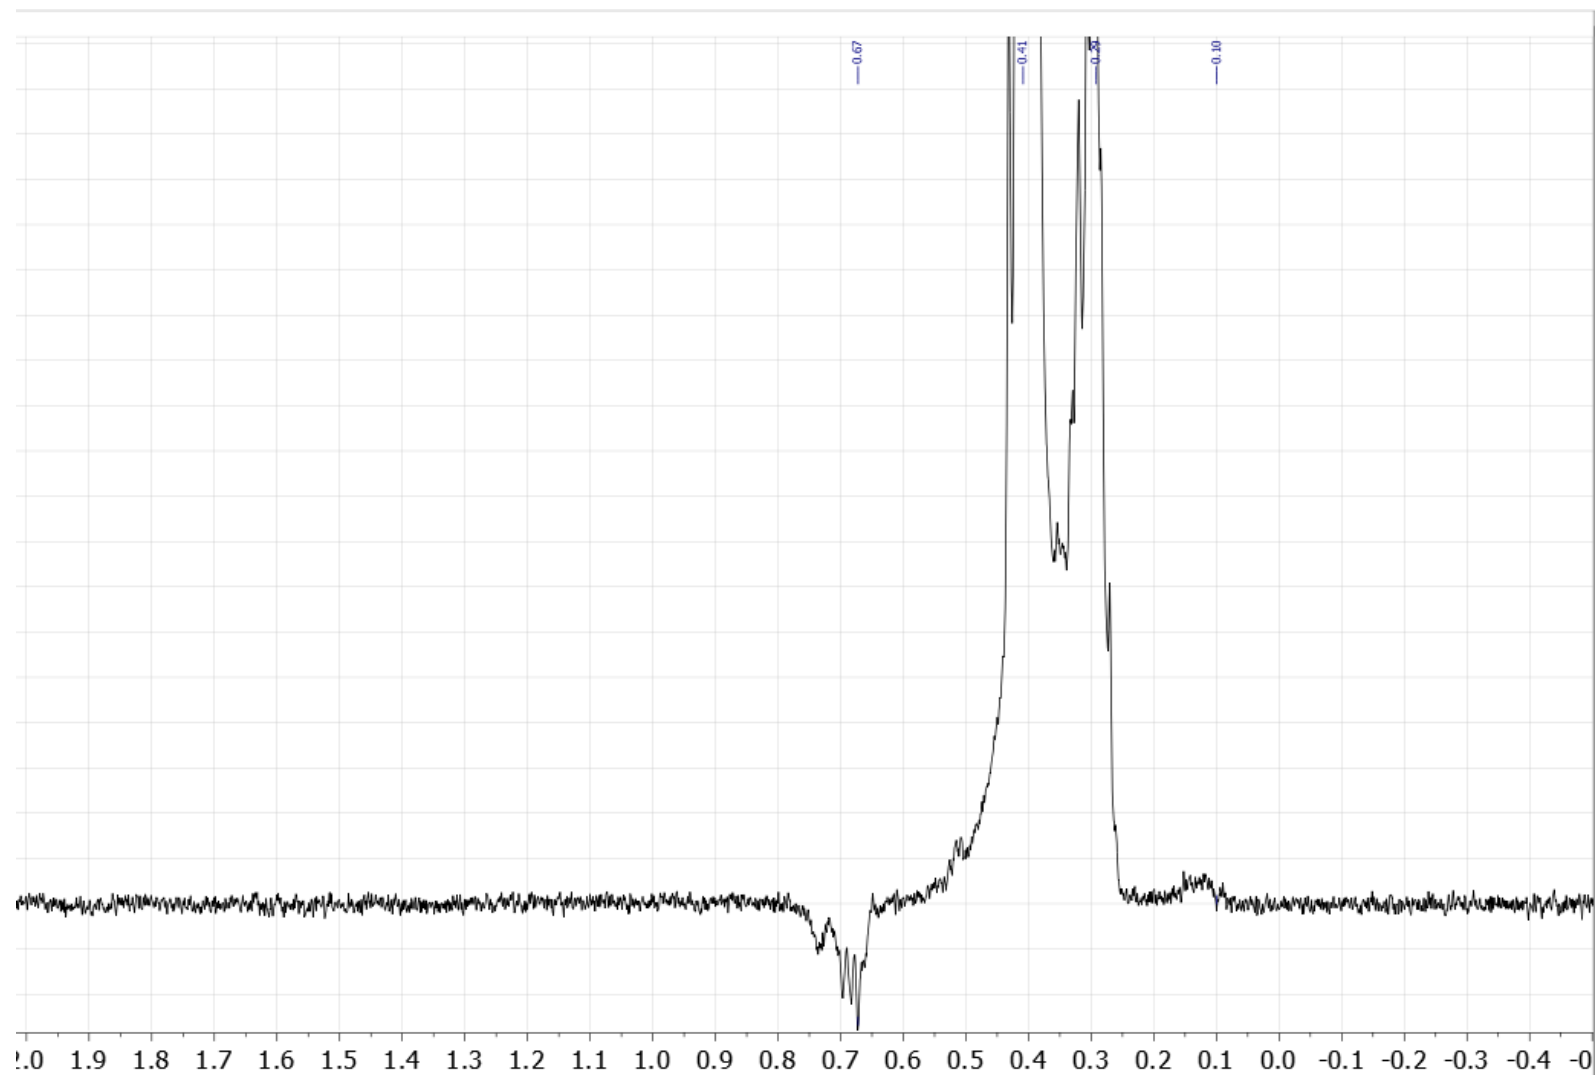

Compound **S15-HCl**  $^1\text{H}$  NMR (400 MHz,  $d_2$ -DCM,  $-78\text{ }^\circ\text{C}$ )

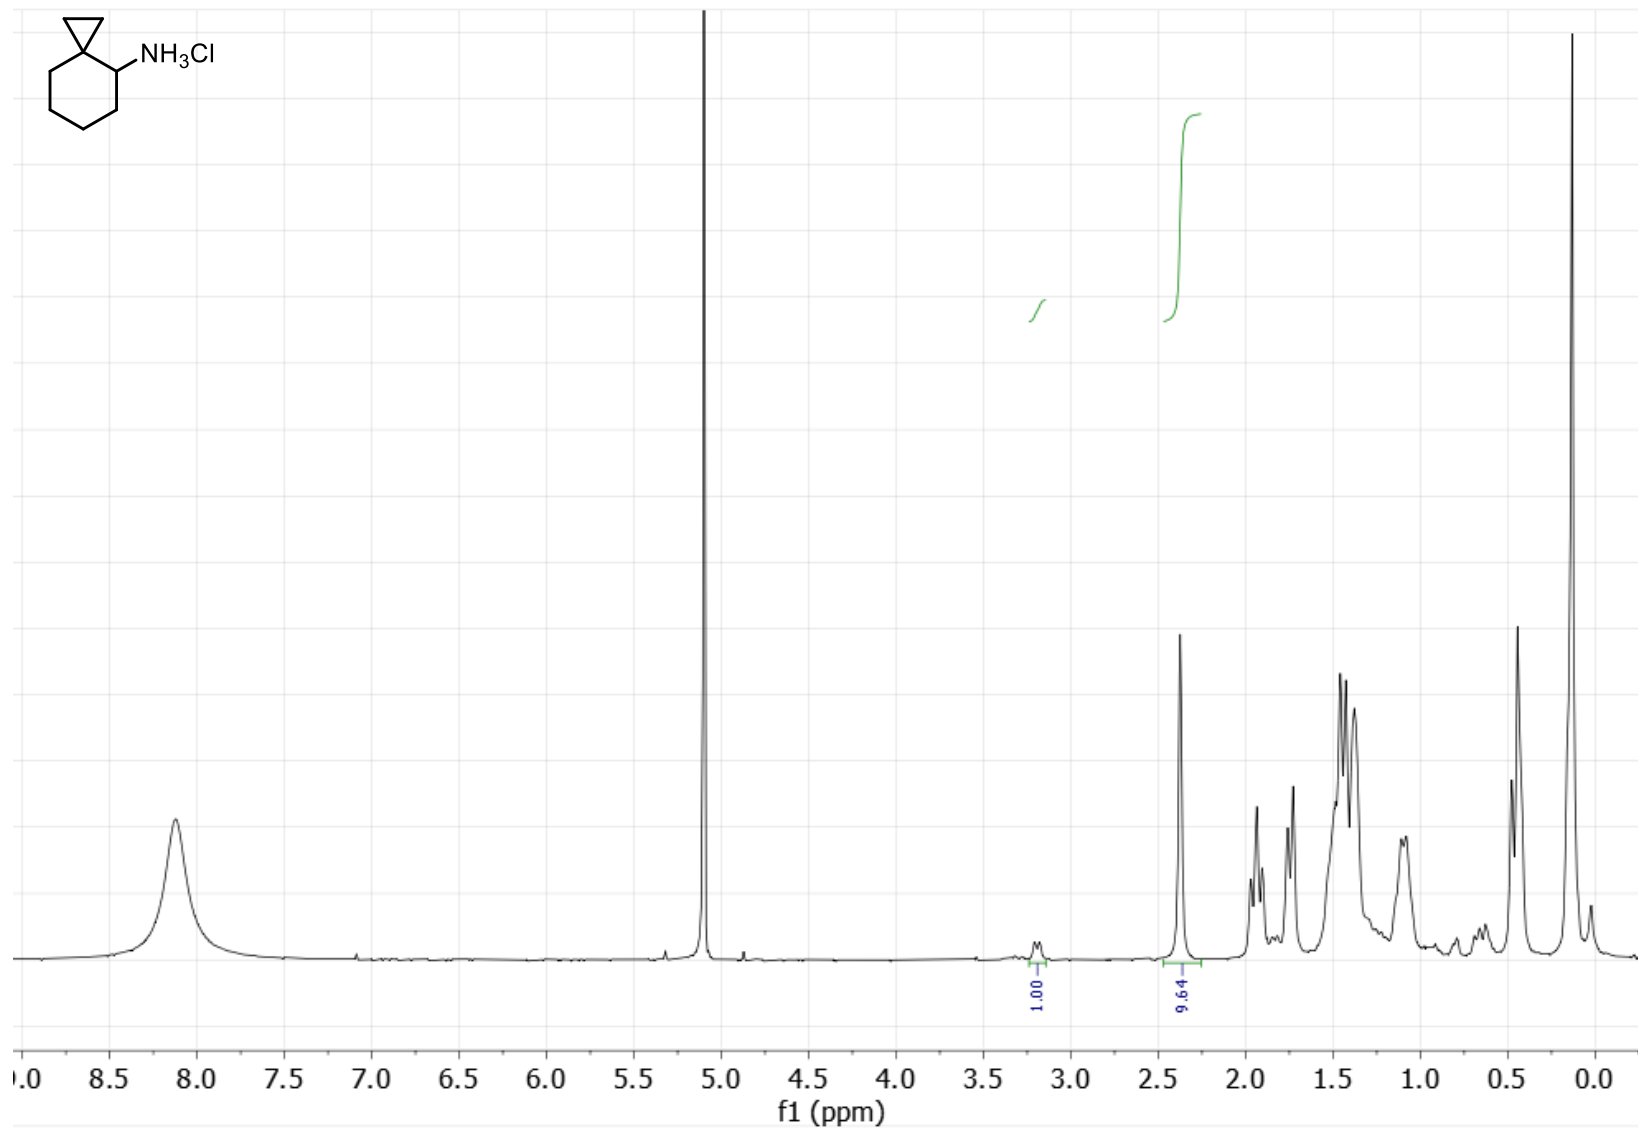

Compound **S15-HCl 1D-NOE** (400 MHz,  $d_2$ -DCM, -78 °C, irradiation at 2.64 ppm)

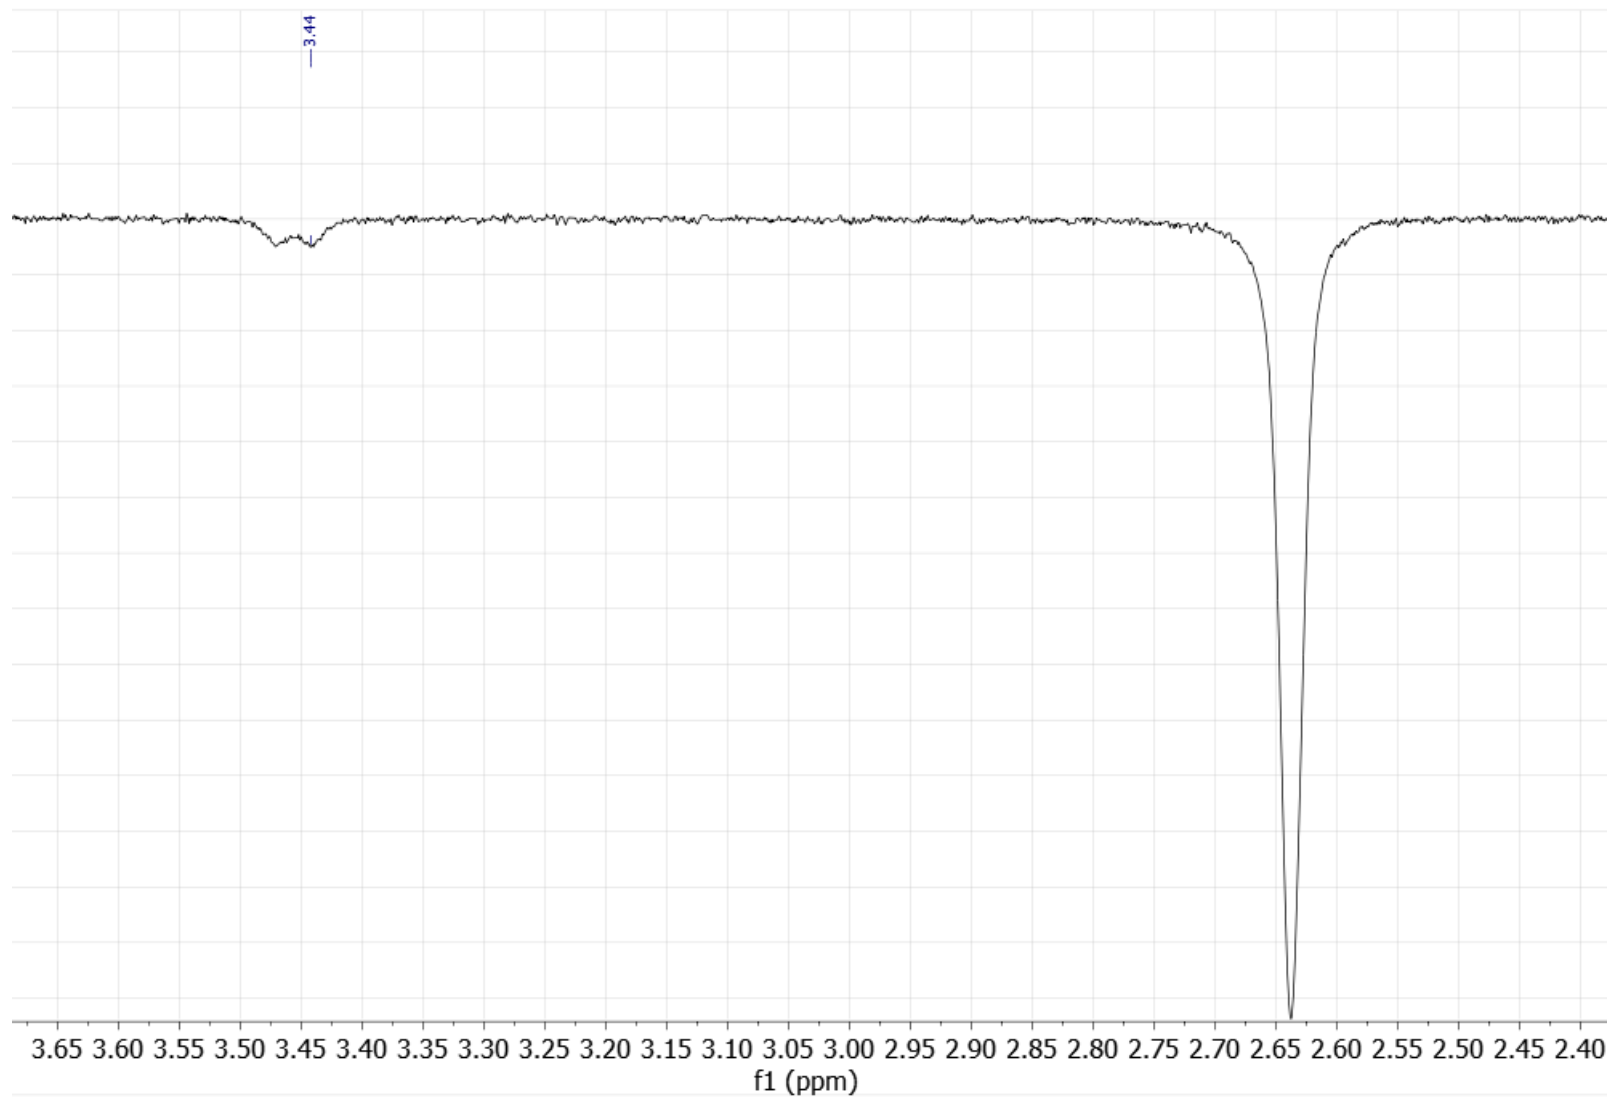

S150

Compound **S15-neutral**  $^1\text{H}$  NMR (400 MHz,  $d_2$ -DCM,  $-78\text{ }^\circ\text{C}$ )

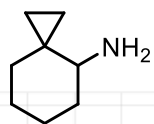

spiro[2.5]octan-4-amine

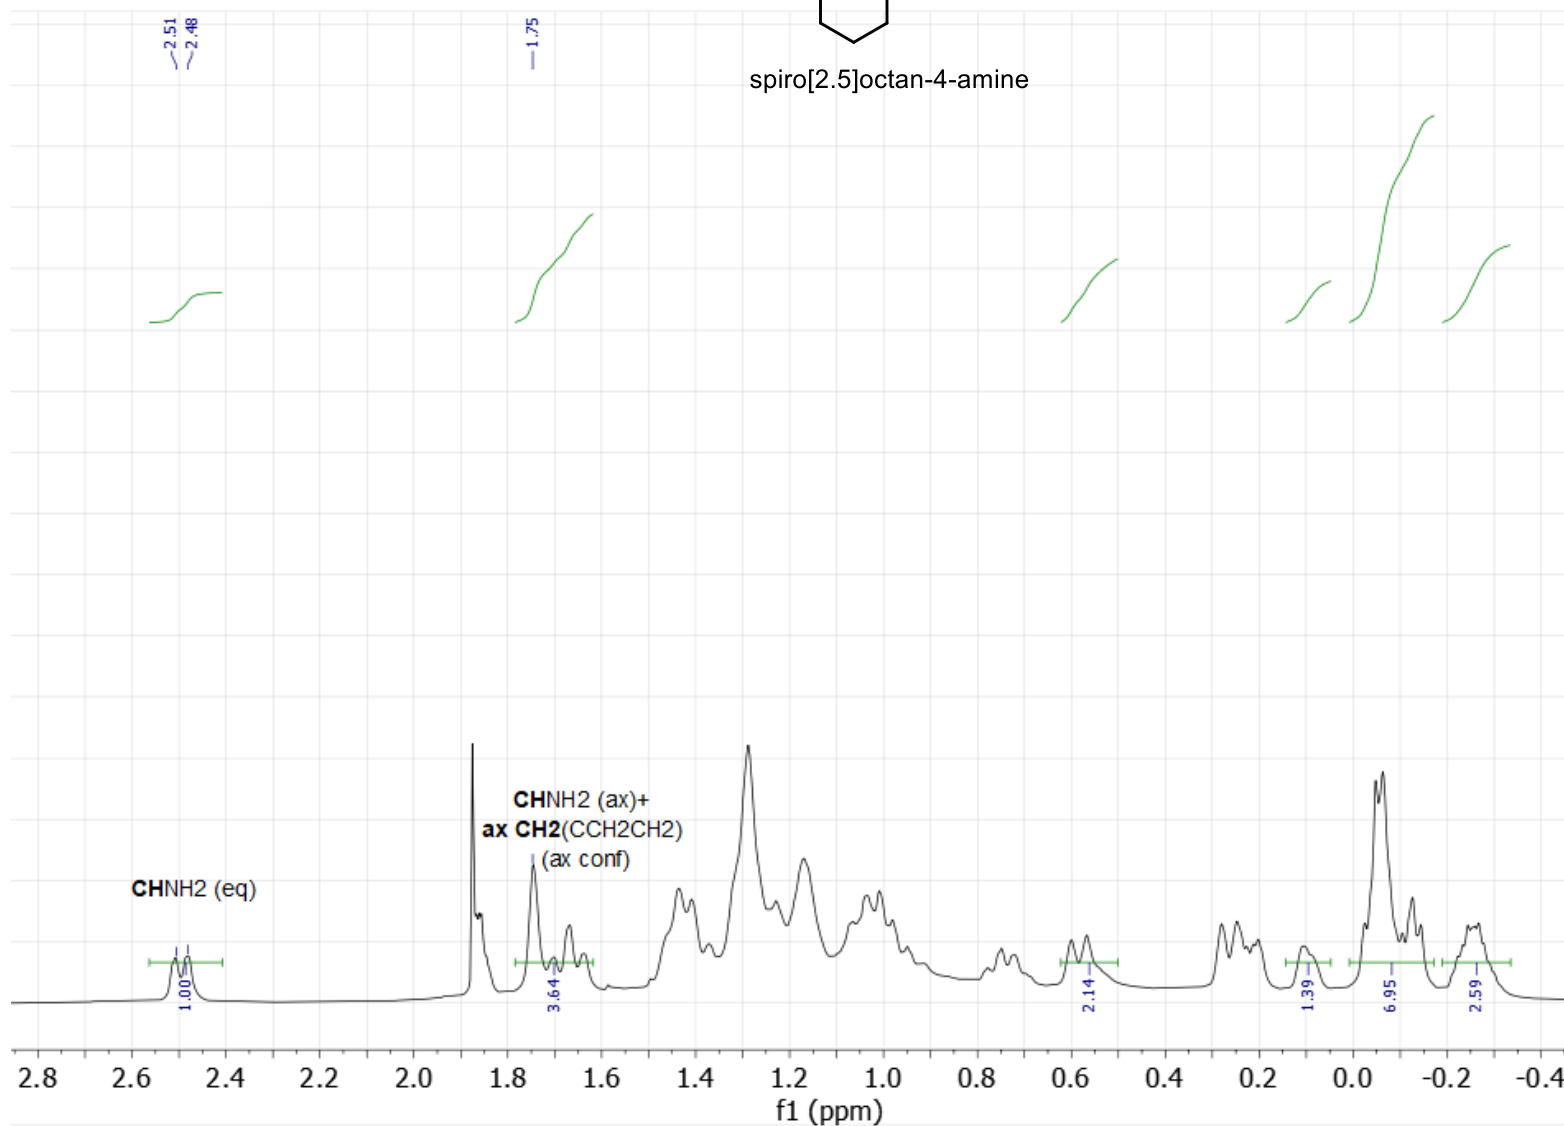

Compound **S15-neutral** COSY (400 MHz, *d*<sub>2</sub>-DCM, -78 °C)



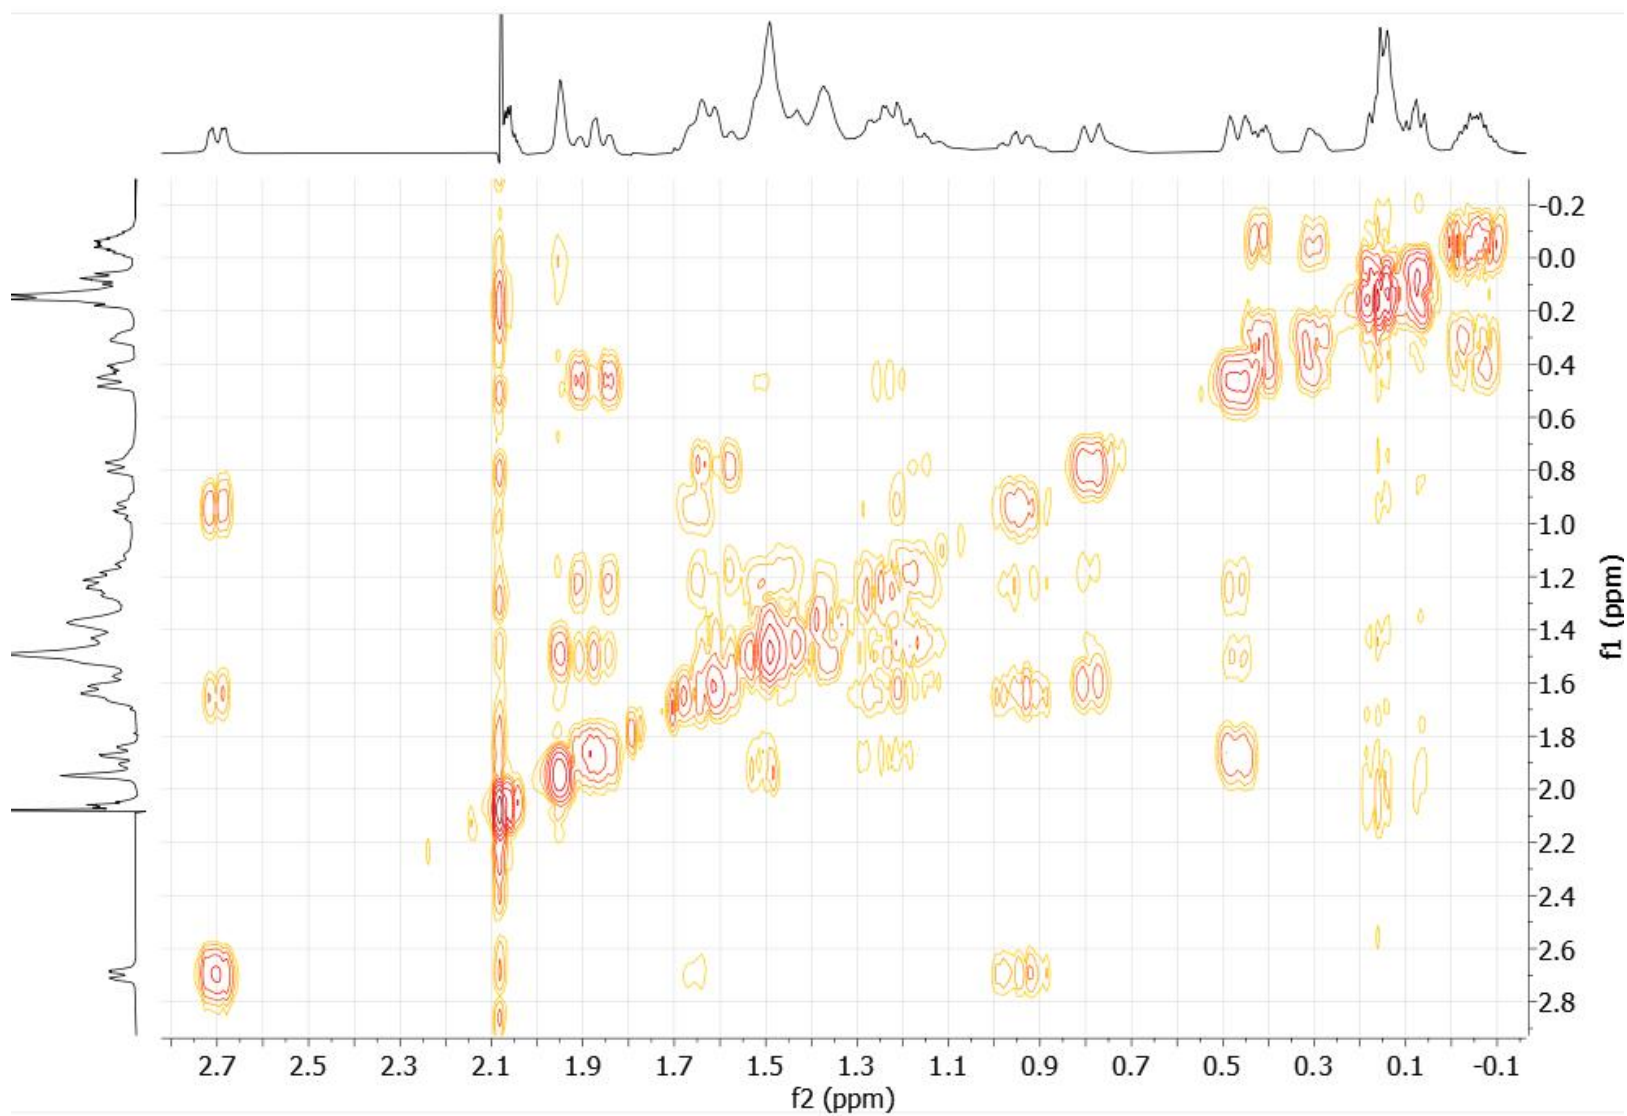

Compound **S15-neutral 1D-NOE** (400 MHz,  $d_2$ -DCM, -78 °C, irradiation at 2.46 ppm)

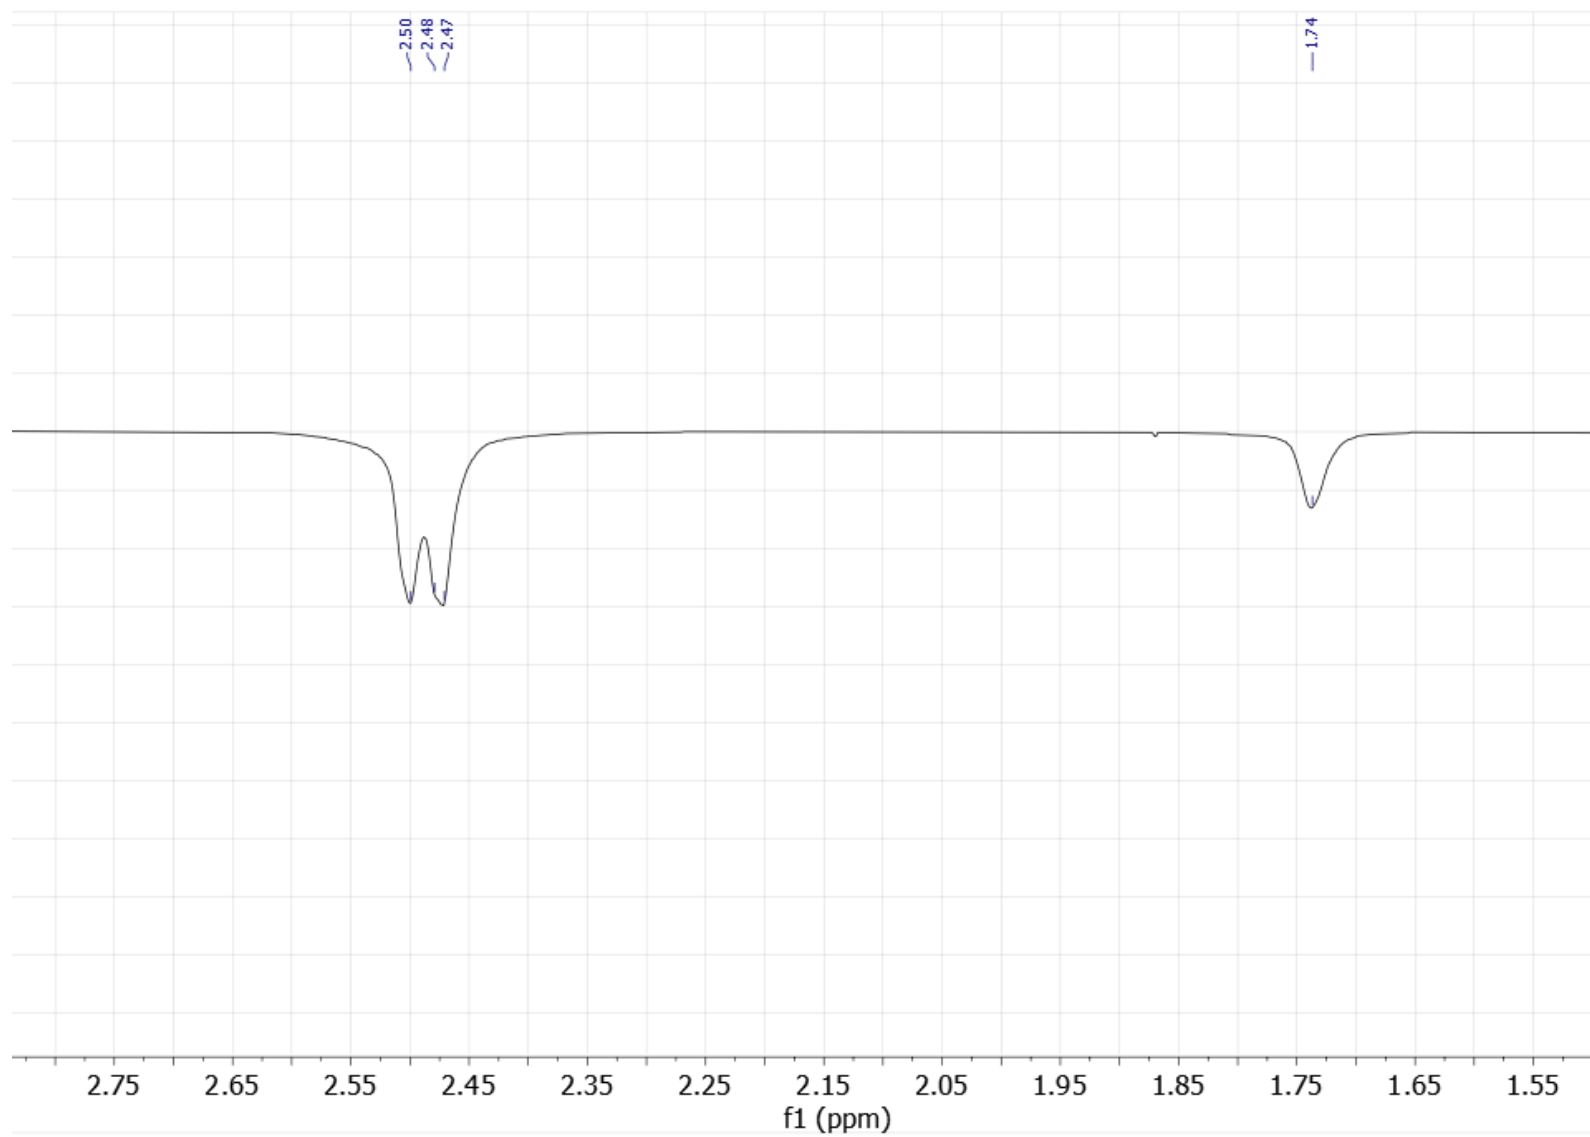

S154

Compound **S16**  $^1\text{H}$  NMR (400 MHz,  $d_6$ -Acetone,  $-78\text{ }^\circ\text{C}$ )

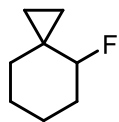

4-fluorospiro[2.5]octane

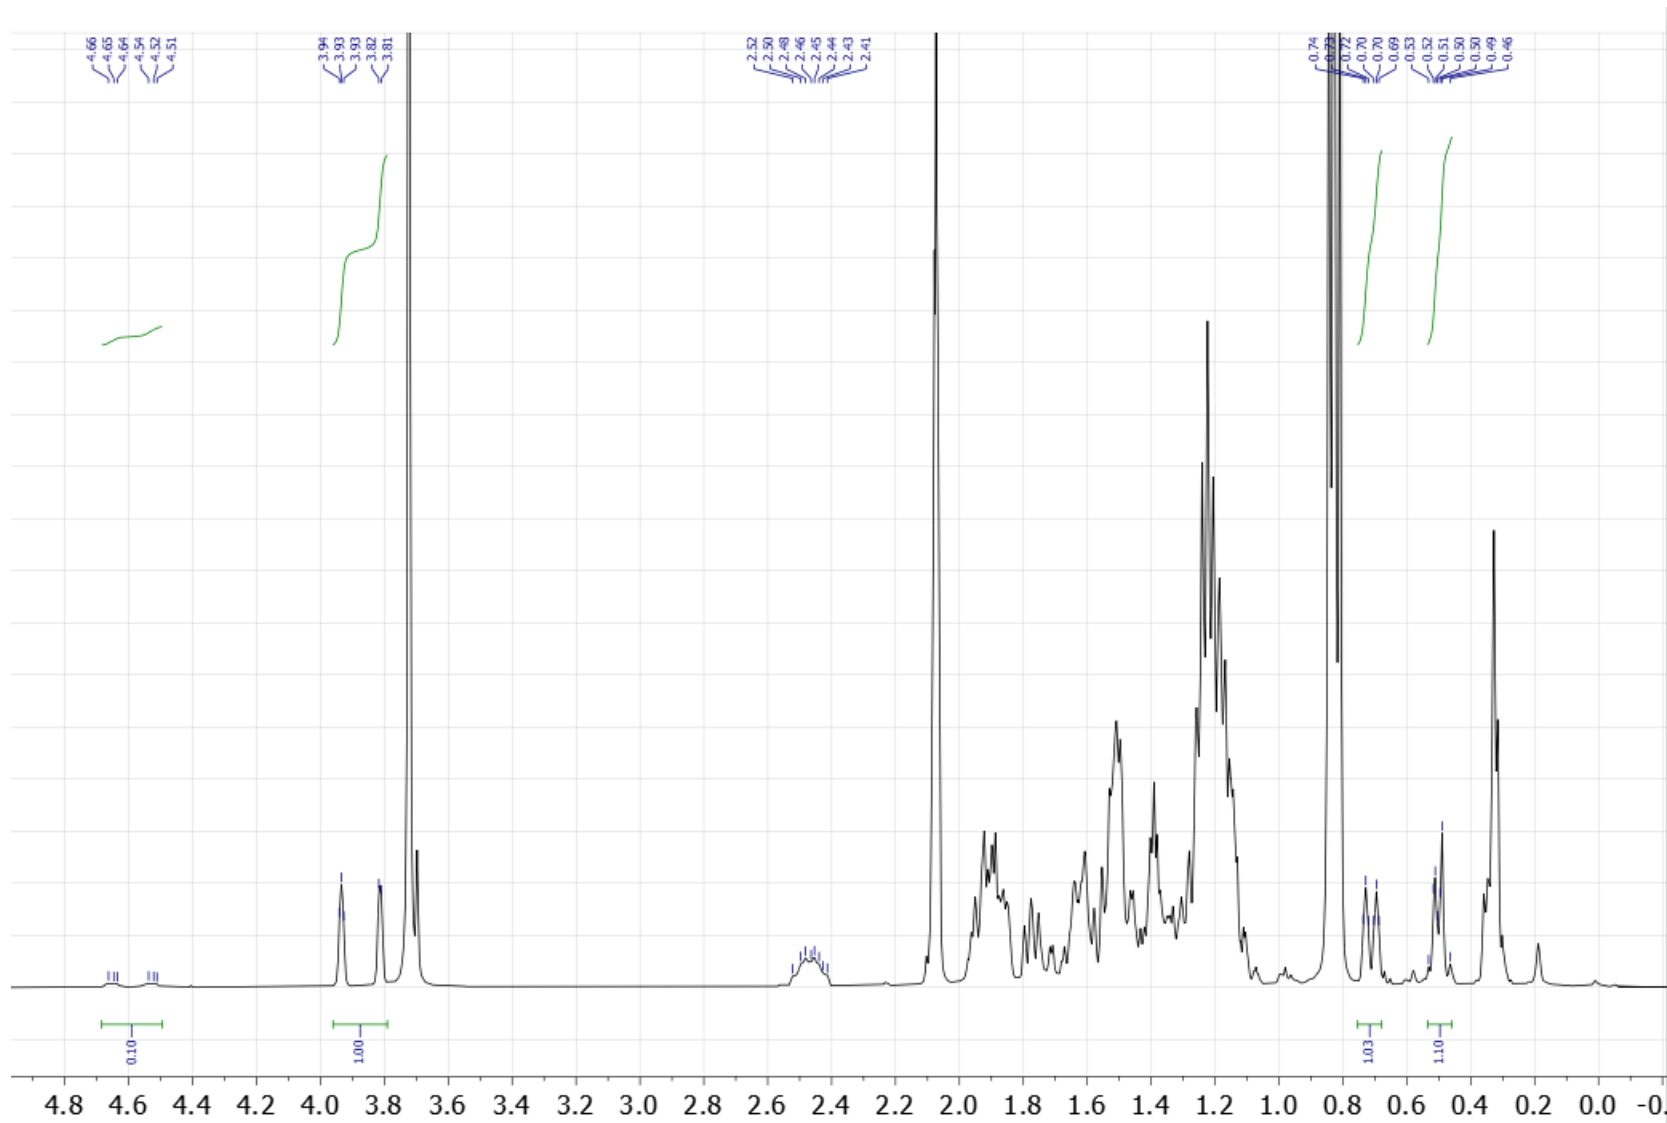

Compound **S16**  $^{19}\text{F}$  NMR (376.7 MHz,  $d_6$ -Acetone,  $-78\text{ }^\circ\text{C}$ ), with zoom of peak multiplicity

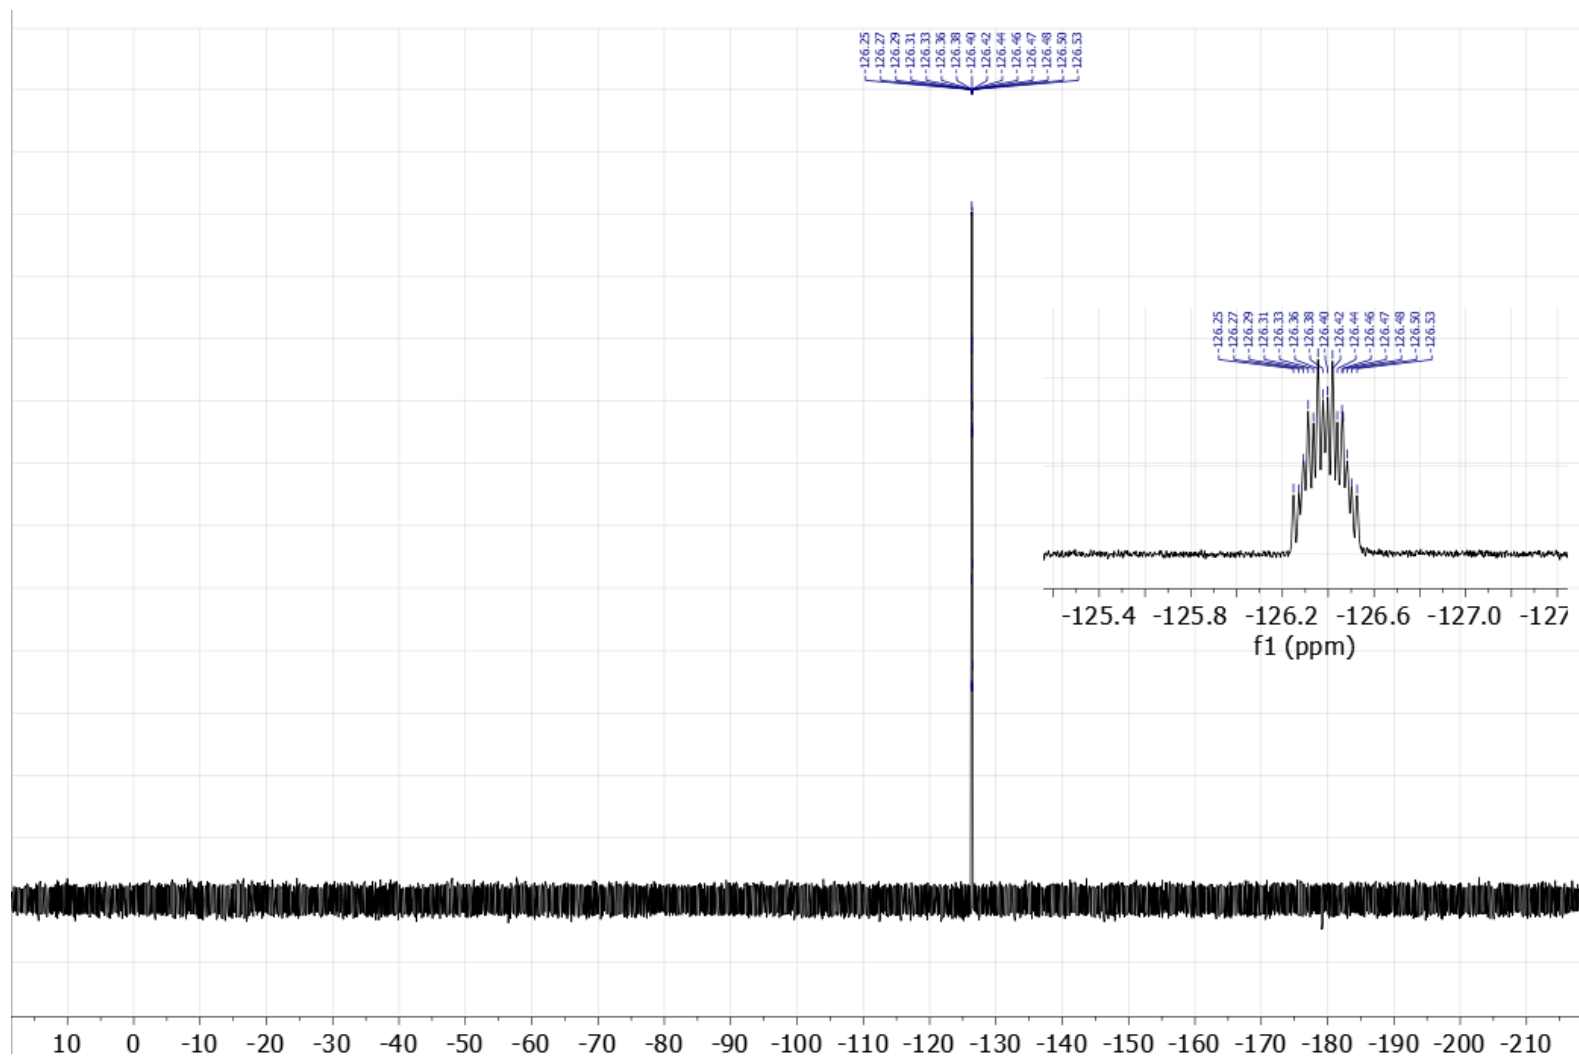

Compound **S16 1D NOE** (irradiation at 3.48 ppm, 400 MHz, *d*<sub>6</sub>-Acetone, -78 °C)

\*Note that irradiating the left peak of such a doublet yields the corresponding left peak of the conformer's doublet

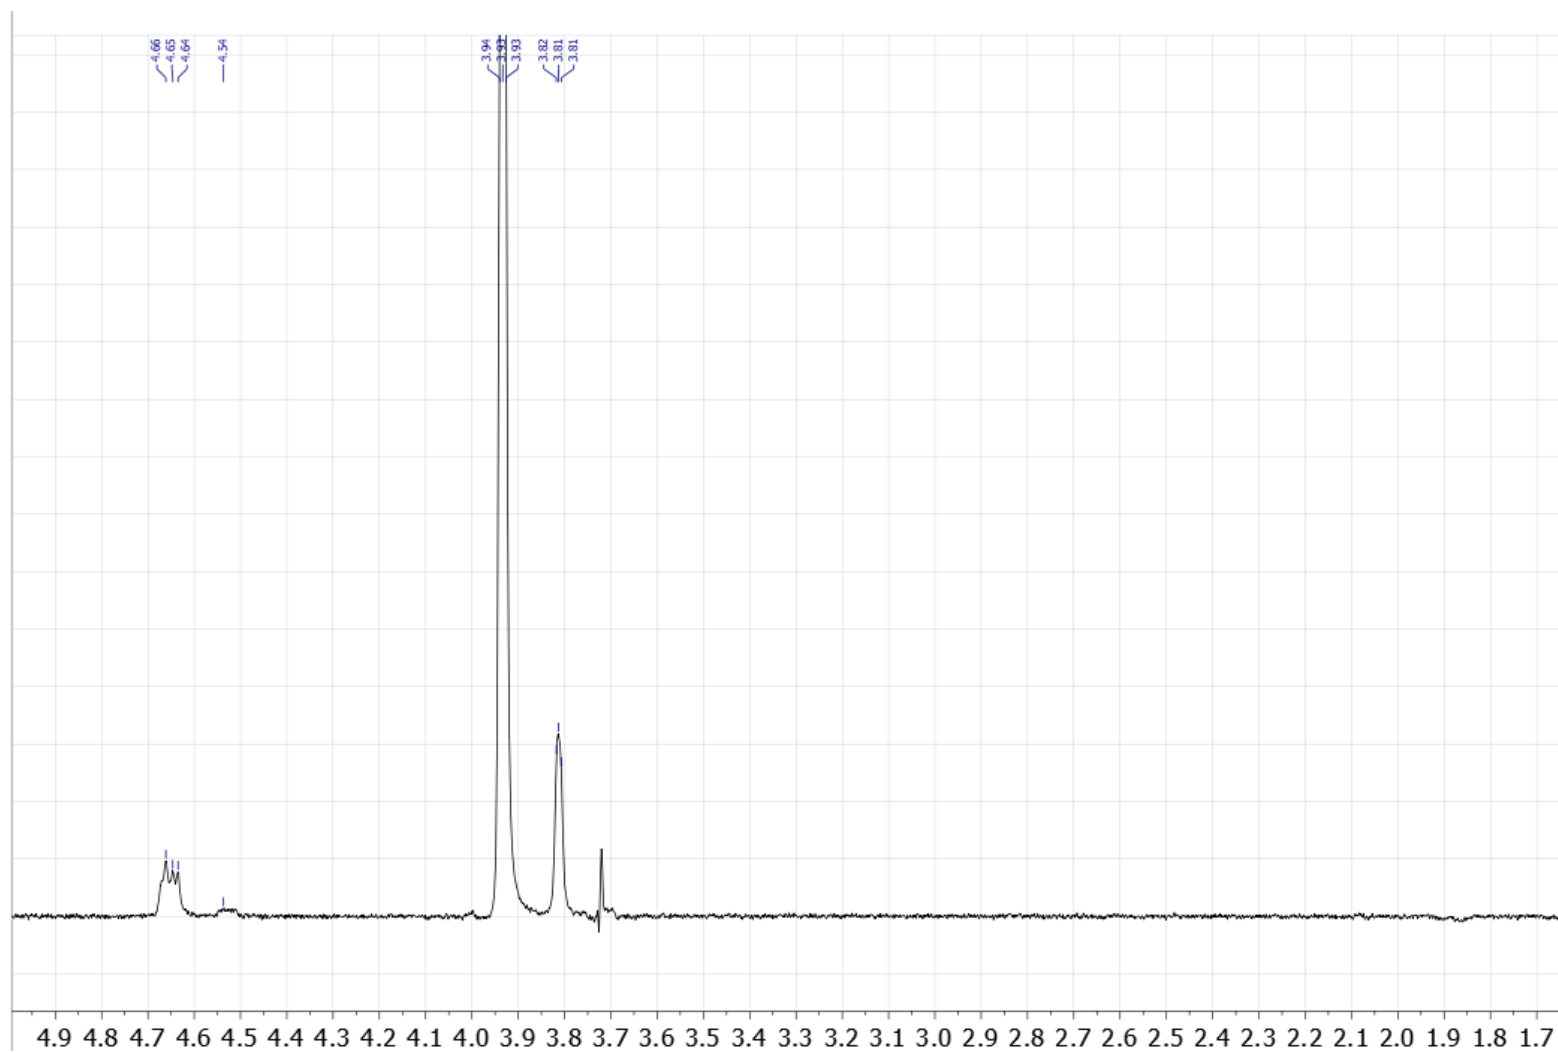

Compound **S17**  $^1\text{H}$  NMR (400 MHz,  $d_6$ -Acetone,  $-78\text{ }^\circ\text{C}$ )

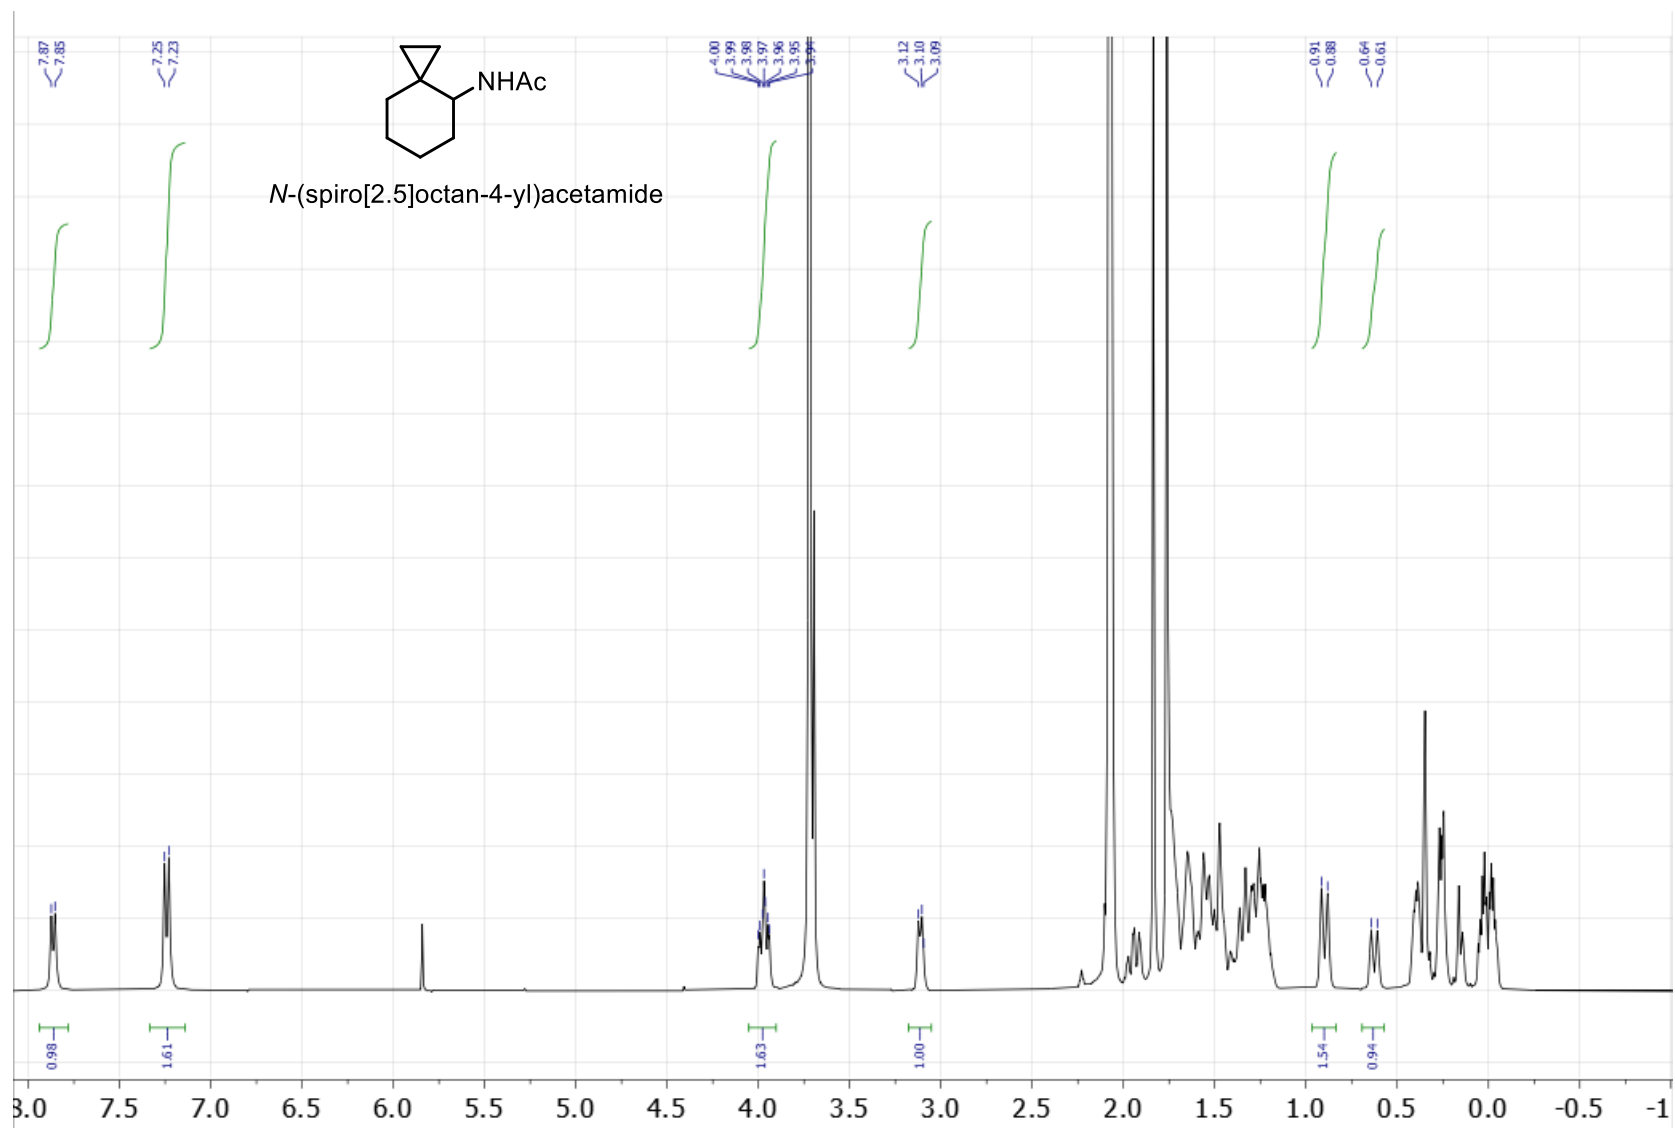

Compound **S17 1D NOE** (irradiation at 3.96 ppm, 400 MHz, *d*<sub>6</sub>-Acetone, -78 °C)

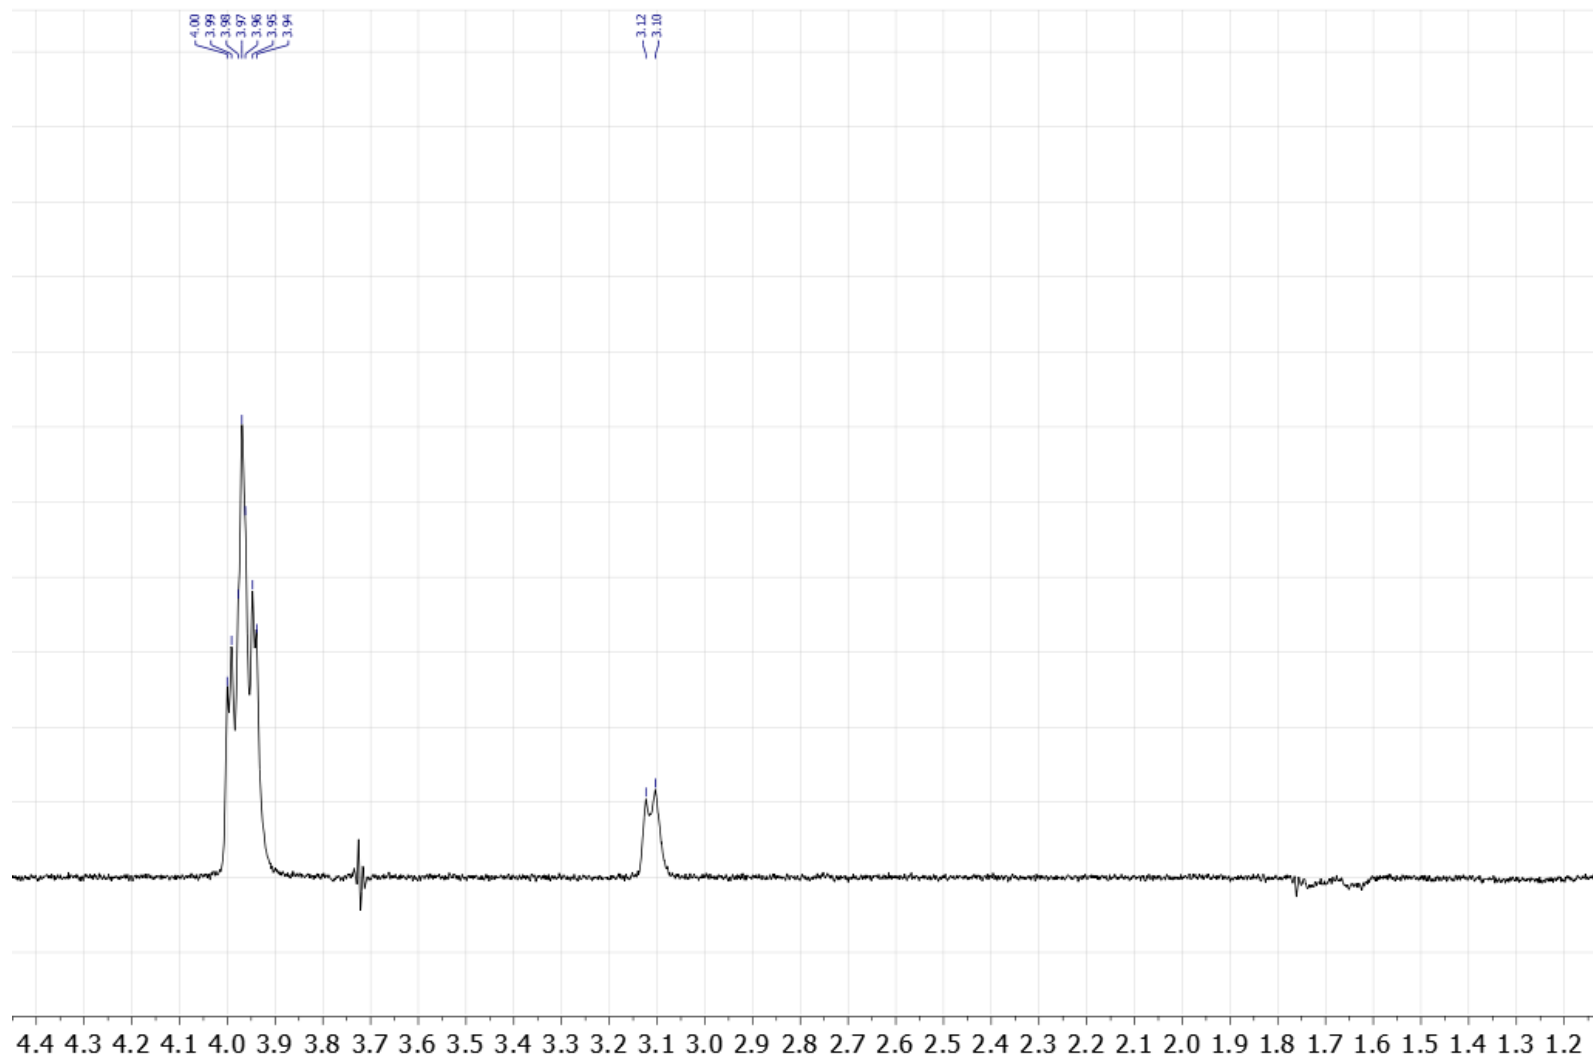



Compound **S17**  $^1\text{H}$  NMR (400 MHz,  $d_8$ -Toluene,  $-78\text{ }^\circ\text{C}$ )

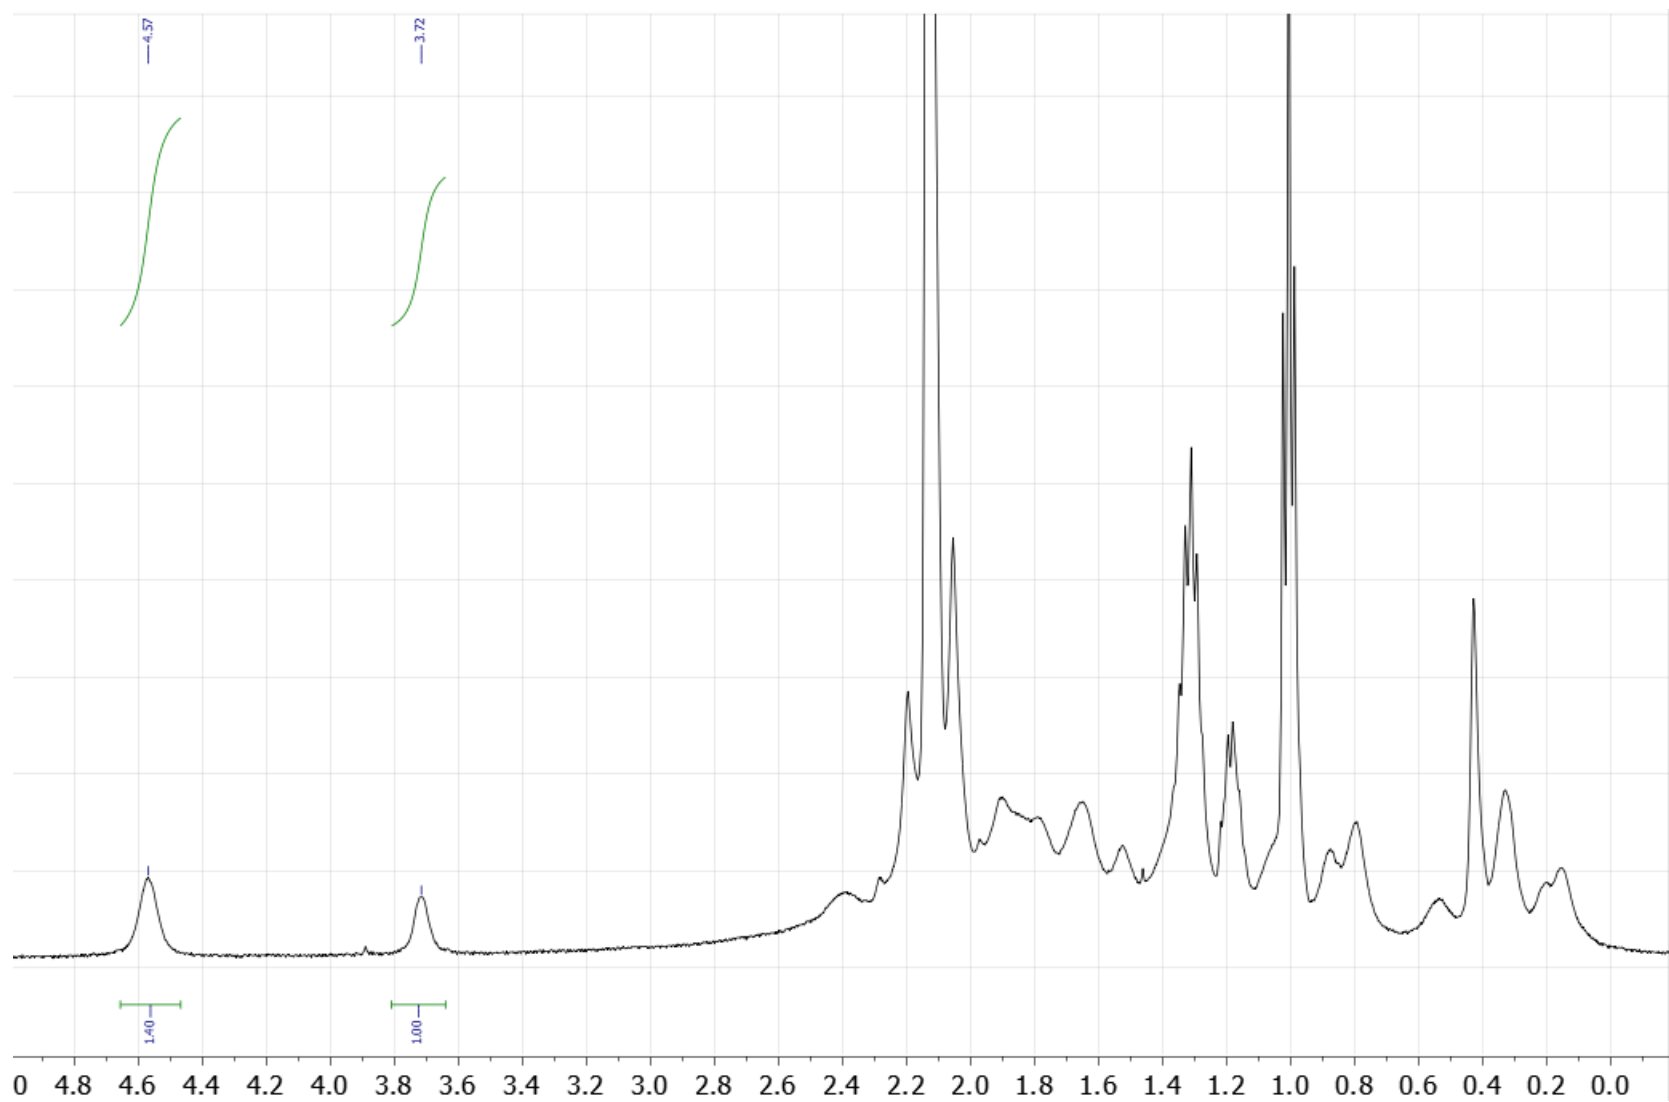

Compound **S18**  $^1\text{H}$  NMR (400 MHz,  $d_6$ -Acetone,  $-78\text{ }^\circ\text{C}$ )

**\*Note: Peaks not resolved at  $-78$**

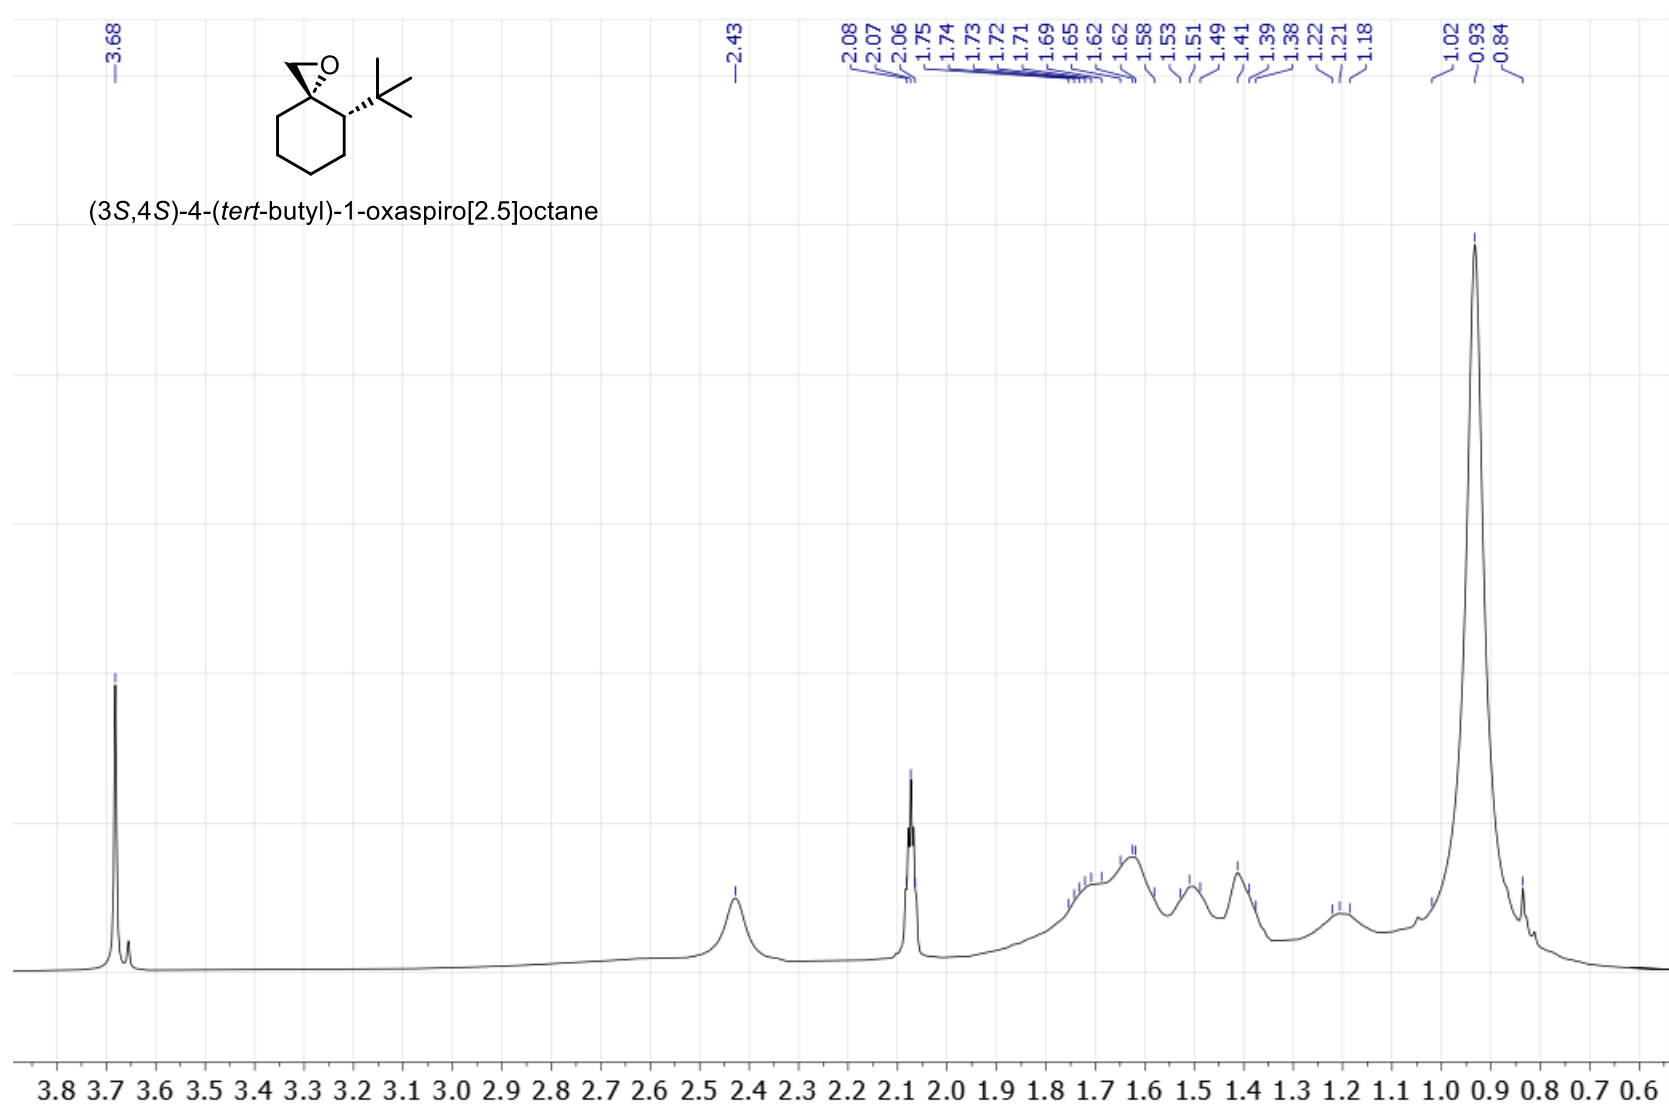

Compound **S18**  $^1\text{H}$  NMR (400 MHz,  $d_6$ -Acetone, **-98 °C**)

**Note: Peaks now resolved at -98 °C**

Rationale for assignment: The notable difference between major and minor conformations that we can see clearly from the spectrum is the difference in chemical shift for the epoxide methylene. The major conformer has overlapping methylenes with effectively identical shift, while the minor has a large difference. We would expect a large difference in shift for the equatorial tert-butyl methylenes, as the syn-proton will be close to the tert-butyl, and the anti-proton will be close to the equatorial proton on the other side of the ring. Conversely, the methylenes in the axial tert-butyl conformation are both closest to equatorial protons. NOES were unsuccessful at this temperature.

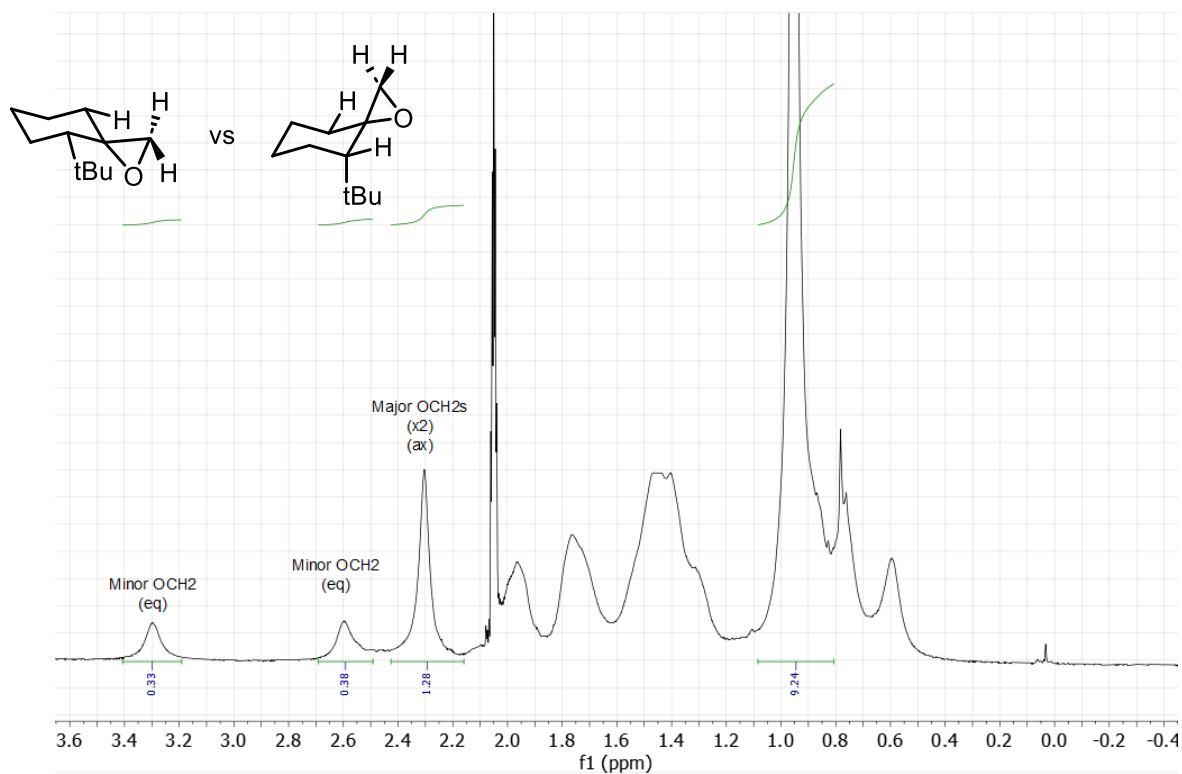

Compound **S18** HSQC (400 MHz,  $d_6$ -Acetone,  $-98\text{ }^\circ\text{C}$ )

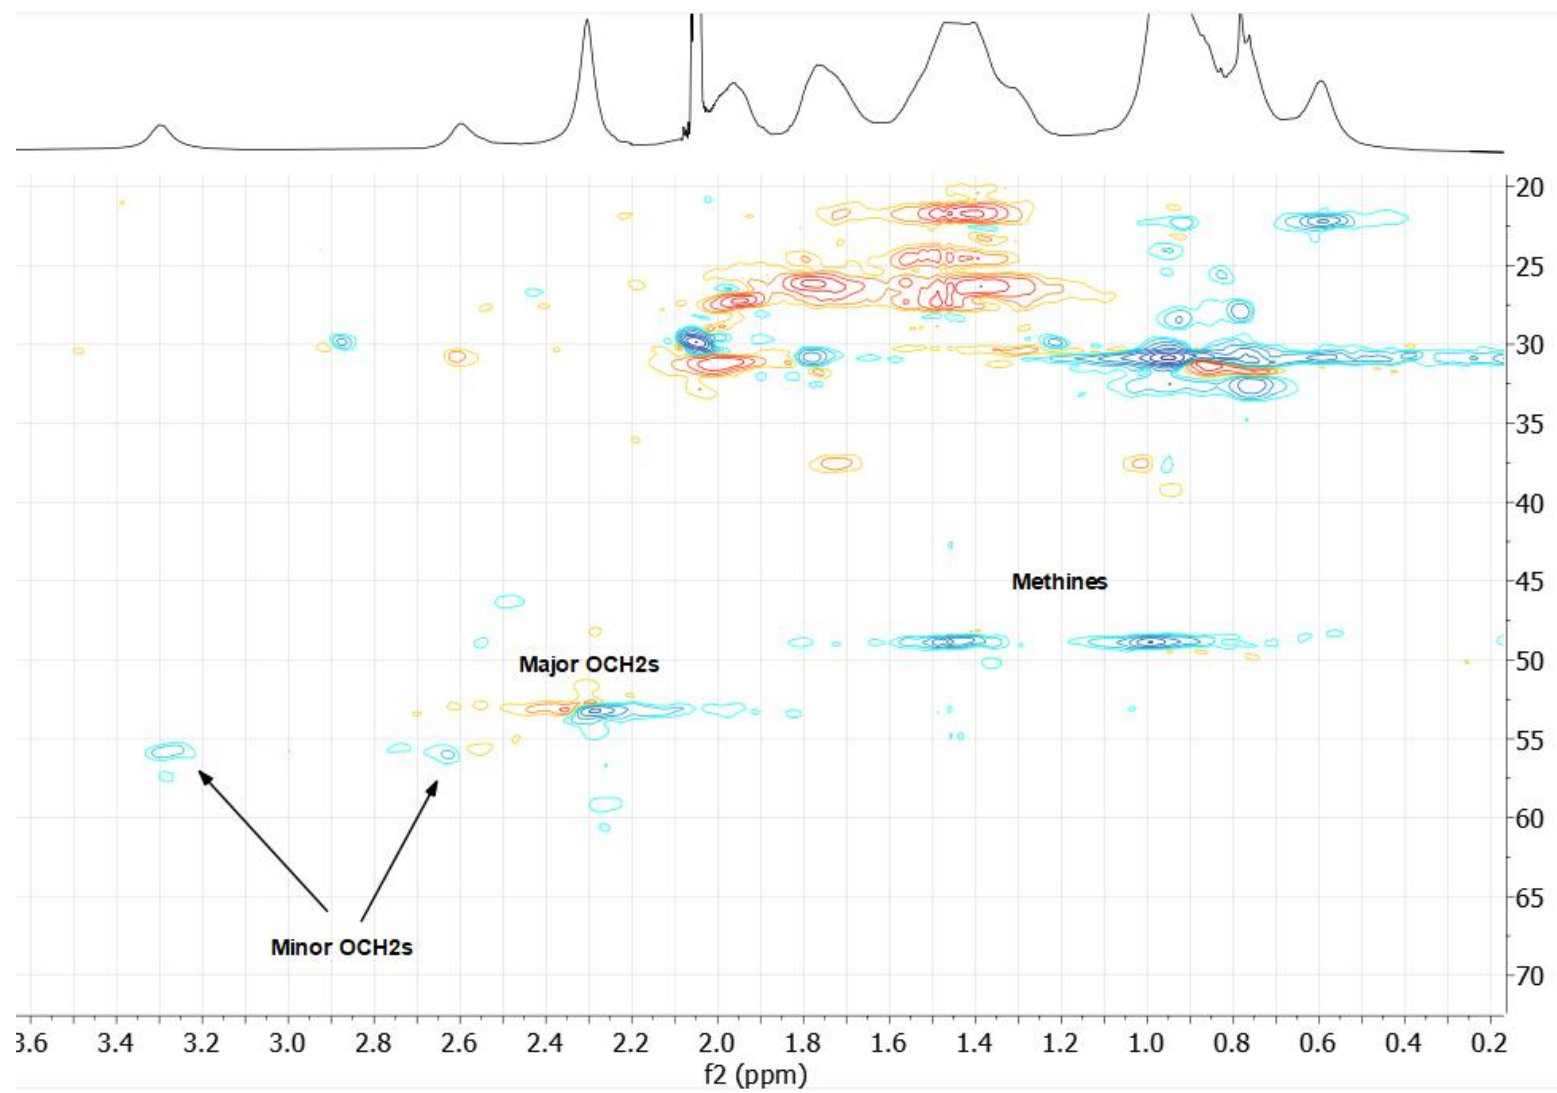

Compound **S19**  $^1\text{H}$  NMR (400 MHz,  $d_6$ -Acetone,  $-78\text{ }^\circ\text{C}$ )

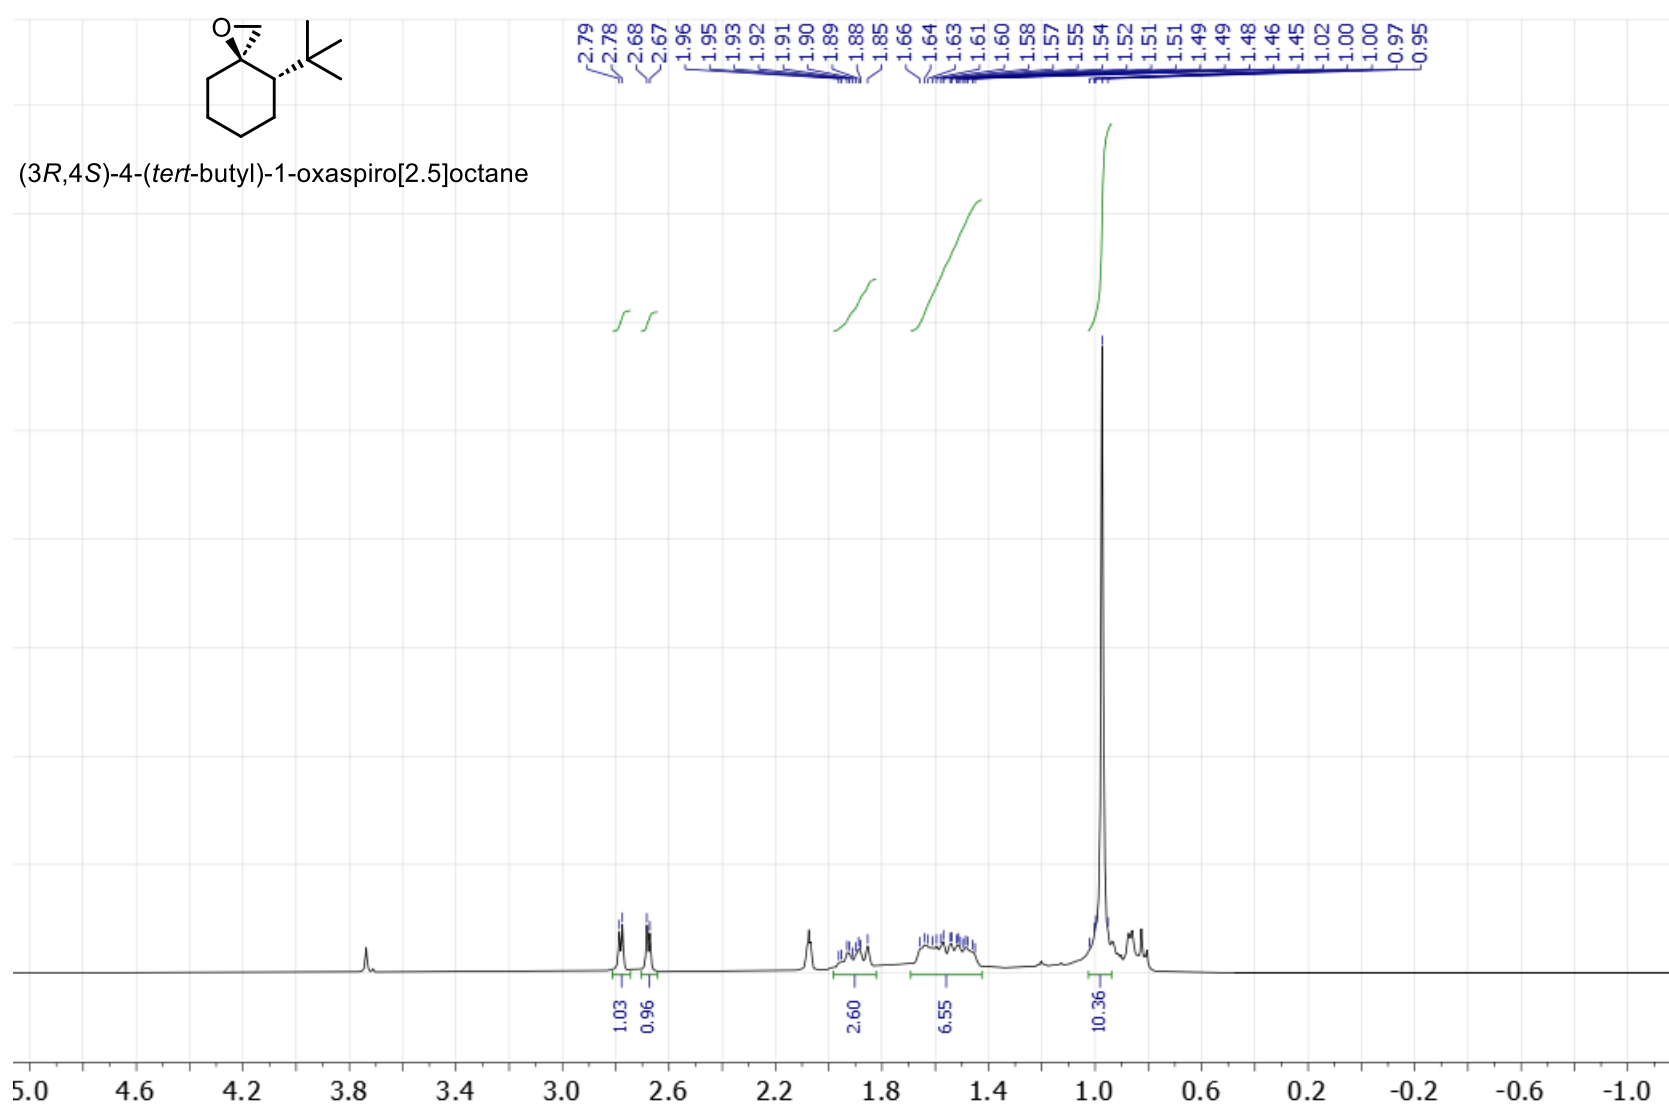

Compound **20**  $^1\text{H}$  NMR (400 MHz,  $d_6$ -Acetone,  $-78\text{ }^\circ\text{C}$ )

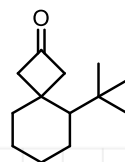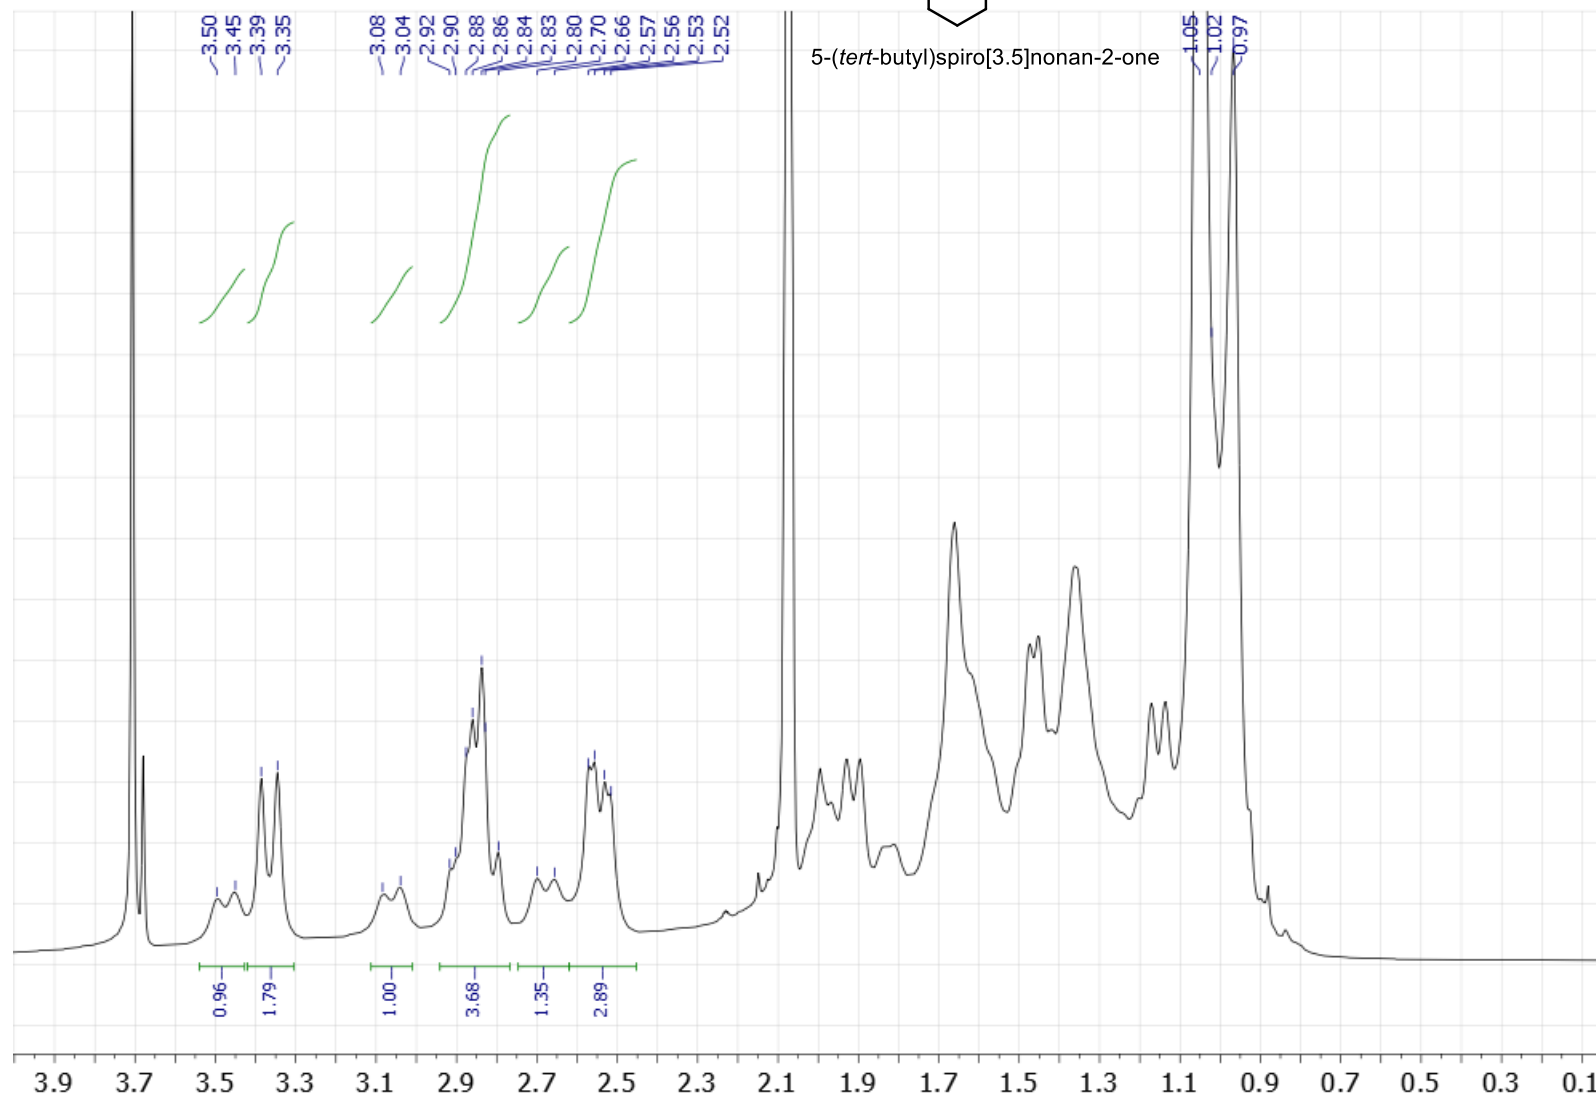

In this case we could reliably measure the ratio of conformers, but were unable to obtain conclusive NOE data. Predictions using NMR were successful at assigning the conformers as the predictions for both conformers were accurate

Chemical shift analysis method:

Shifts calculated using GIAO method at the B3LYP/6-311+G(2d,p) level with SCRF=acetone, referenced to TMS. Shifts were estimated using a Boltzmann distribution of all chair conformers.

Table 1: Predicted (NMR GIAO) vs. observed NMR peaks for compound **S20**

|                 |                                                                                   |          |                                                                                     |          |
|-----------------|-----------------------------------------------------------------------------------|----------|-------------------------------------------------------------------------------------|----------|
|                 | 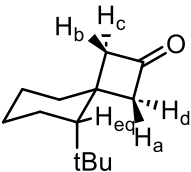 |          |  |          |
|                 | Predicted                                                                         | Observed | Predicted                                                                           | Observed |
| H <sub>ax</sub> | 1.52 ppm                                                                          | 1.64 ppm | H <sub>eq</sub>                                                                     | 1.34 ppm |
| H <sub>a</sub>  | 3.39 ppm                                                                          | 3.38 ppm | H <sub>a</sub>                                                                      | 3.63 ppm |
| H <sub>b</sub>  | 2.72 ppm                                                                          | 2.75 ppm | H <sub>b</sub>                                                                      | 3.19 ppm |
| H <sub>c</sub>  | 2.92 ppm                                                                          | 2.85 ppm | H <sub>c</sub>                                                                      | 2.63 ppm |
| H <sub>d</sub>  | 2.46 ppm                                                                          | 2.52 ppm | H <sub>d</sub>                                                                      | 2.43 ppm |
|                 |                                                                                   |          |                                                                                     | 2.51 ppm |

Compound **S20** HSQC (400 MHz, *d*<sub>6</sub>-Acetone, -78 °C)

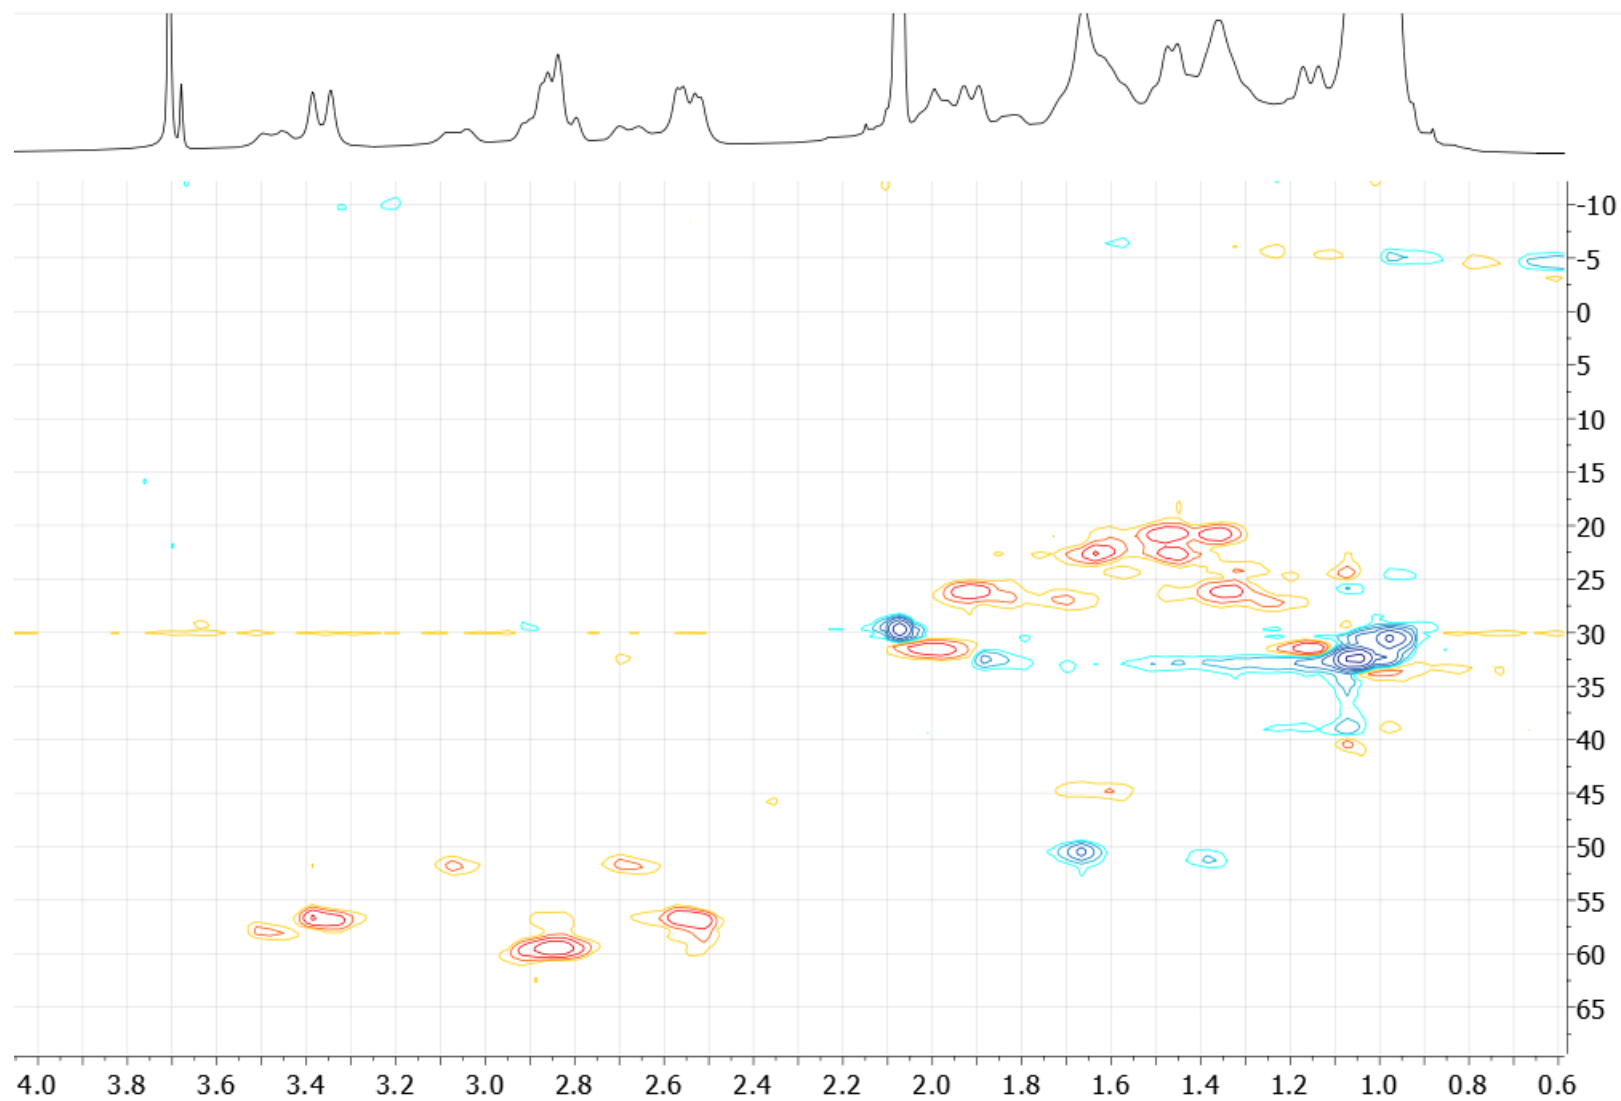



Compound **S20 1D** NOE (irradiation at 3.36 ppm, 400 MHz, *d*<sub>6</sub>-Acetone, -78 °C)

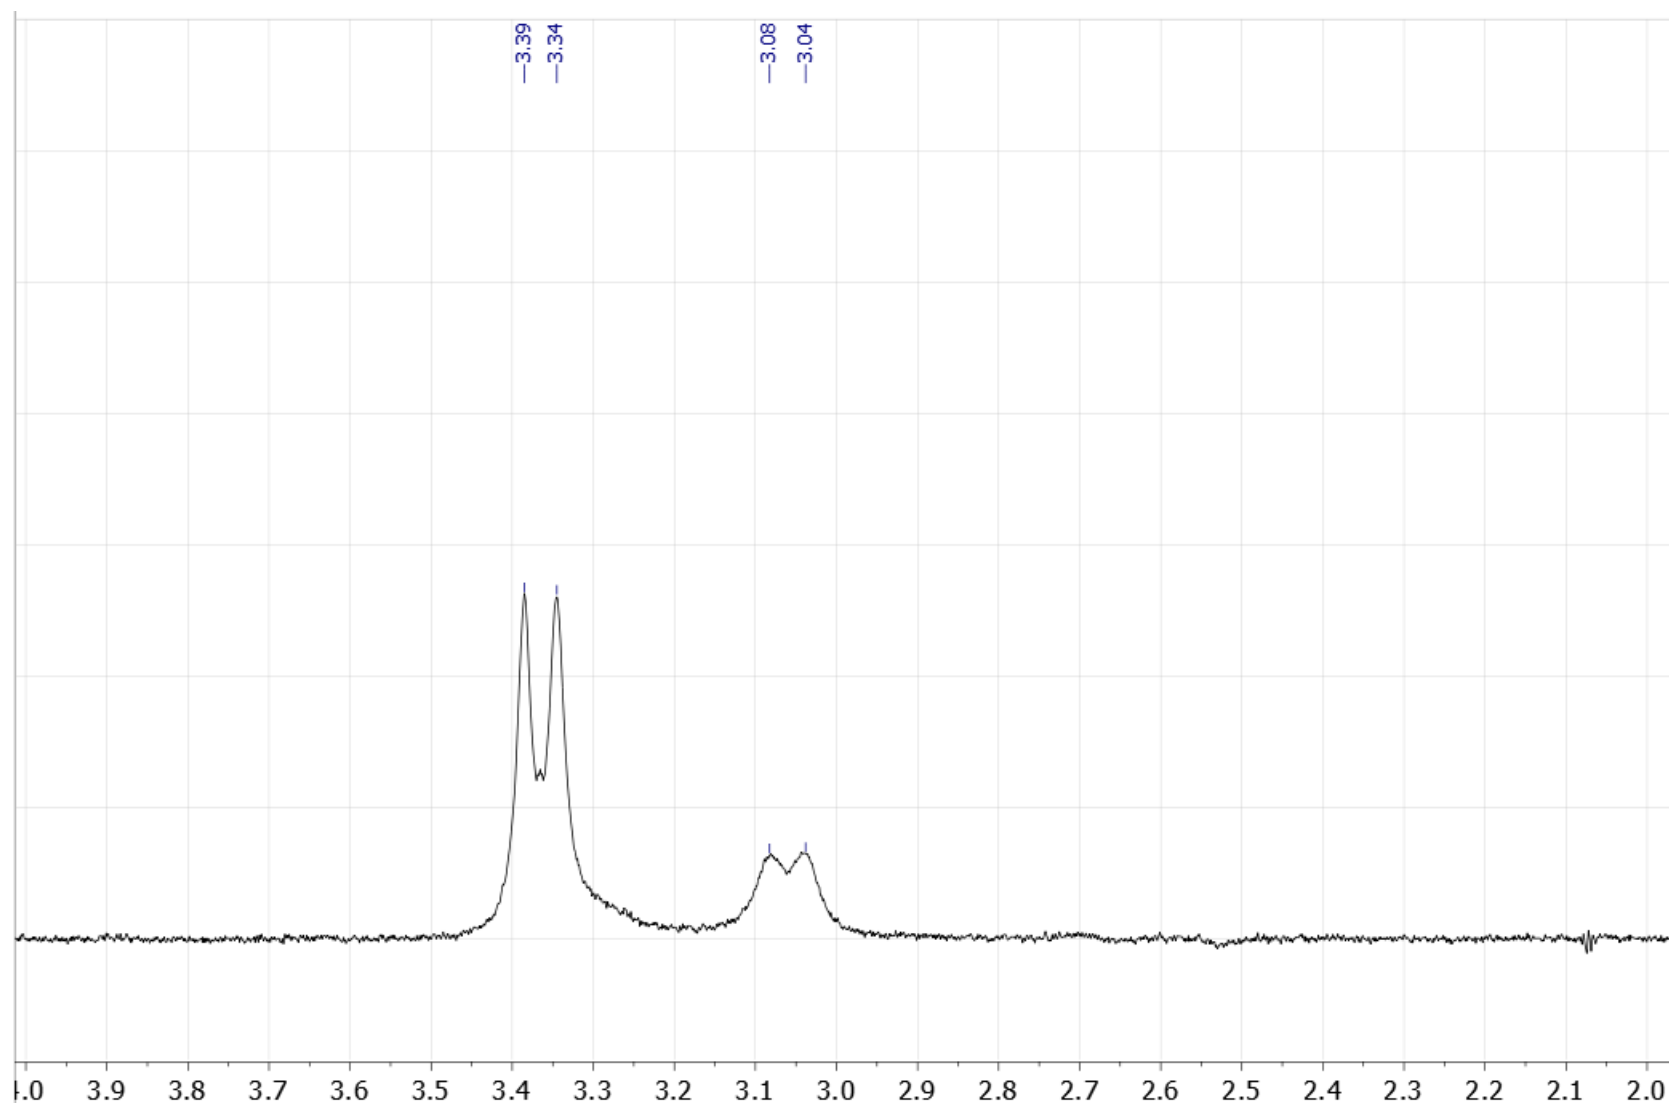

Compound **S21**  $^1\text{H}$  NMR (400 MHz,  $d_6$ -Acetone,  $-78\text{ }^\circ\text{C}$ )

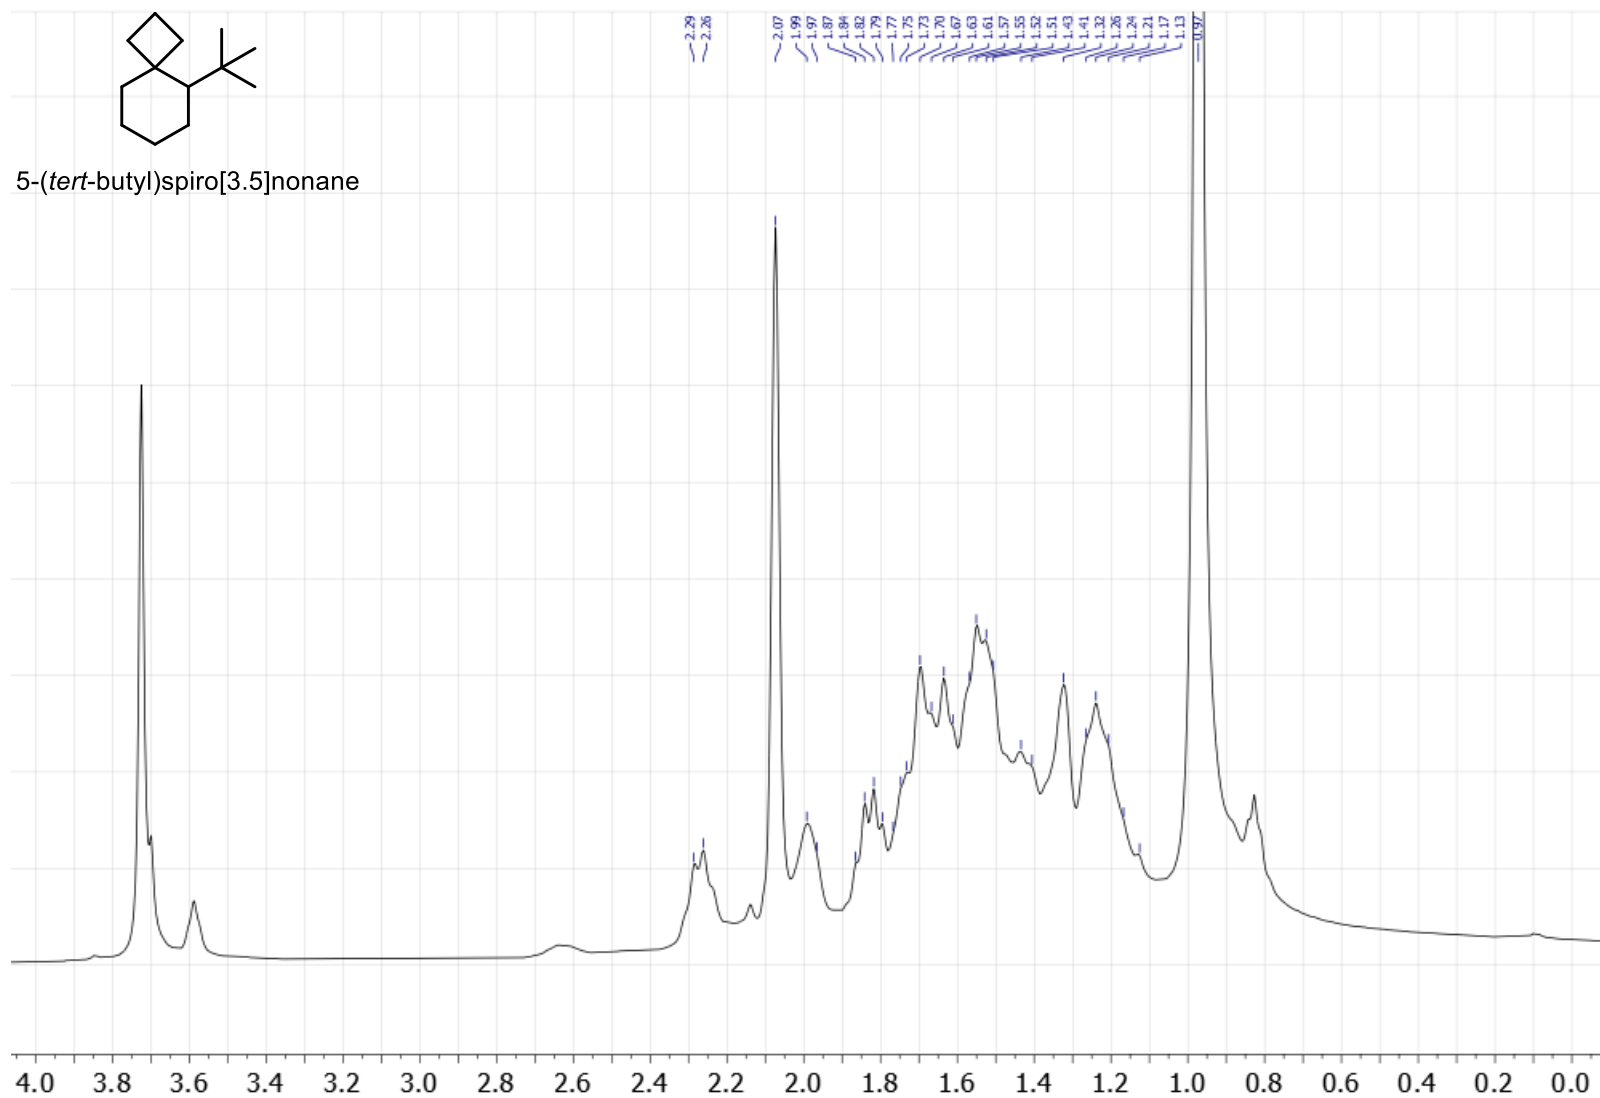

Compound **S21** HSQC (400 MHz, *d*<sub>6</sub>-Acetone, -78 °C)

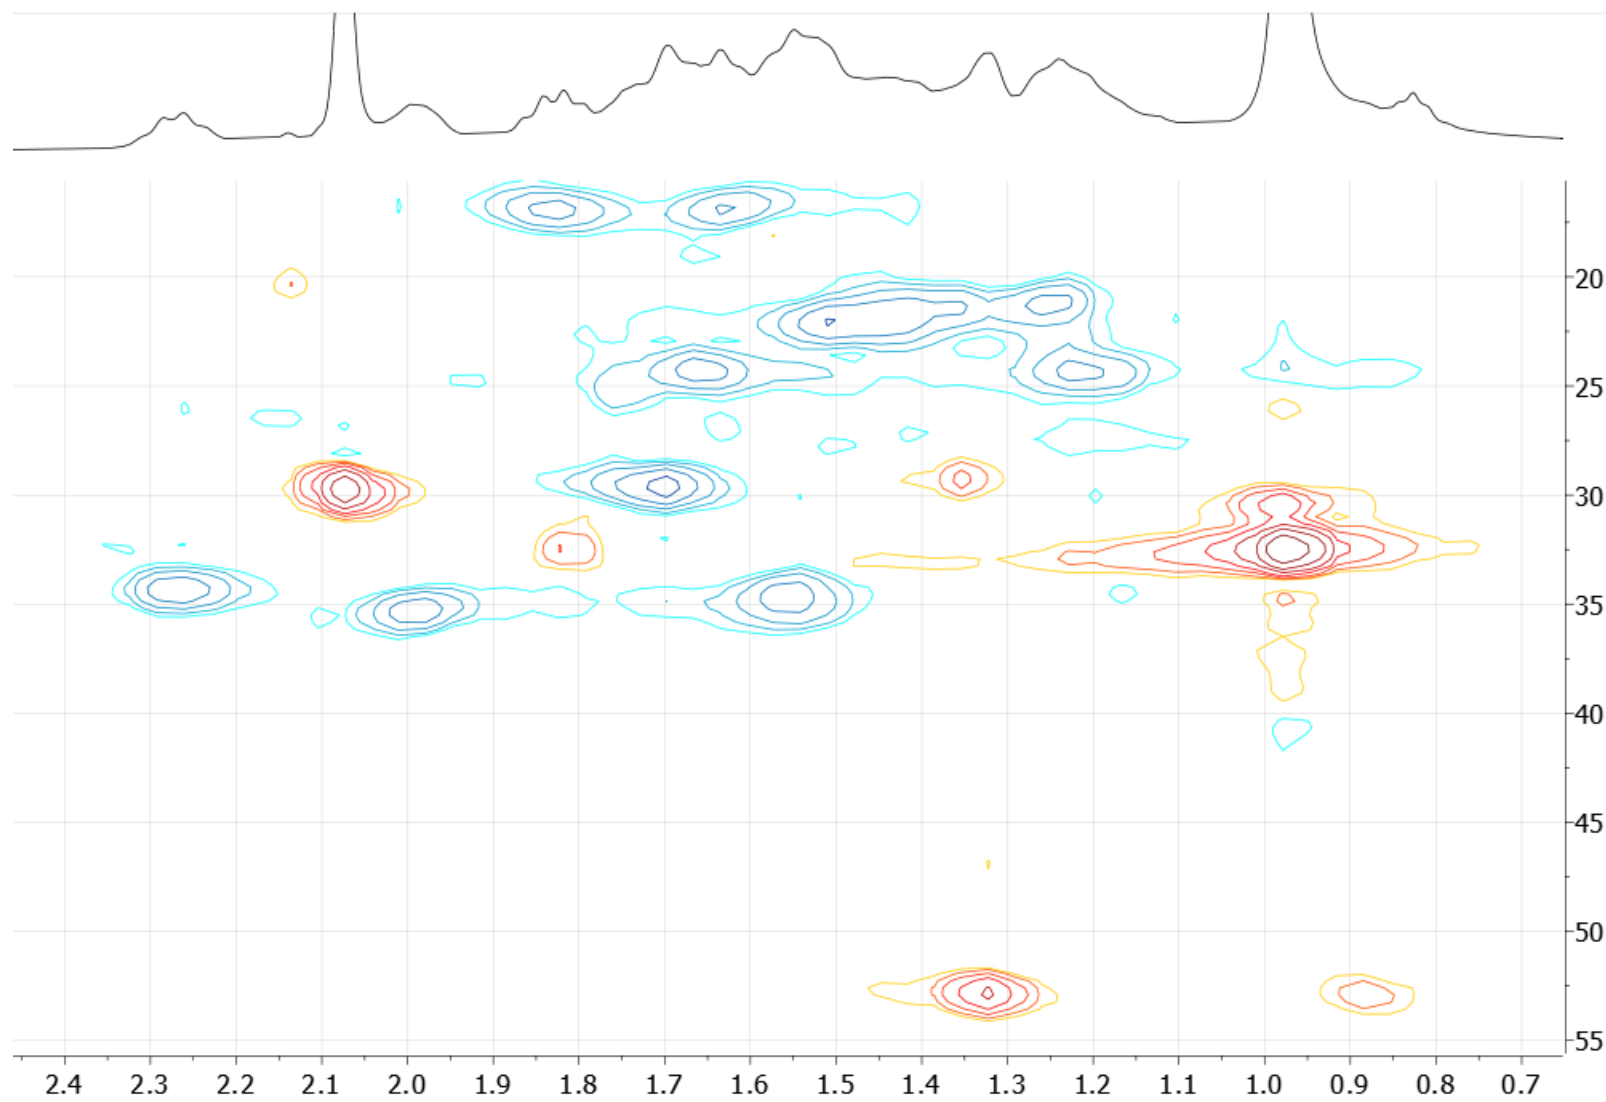

S171

Although we could not quantify the ratio, we were able to assign overlapped methine signals using NMR prediction (see computational SI for details). The predicted vs observed are shown below in table 2.

*Table 2: Predicted vs observed chemical shifts of compound S21 at -78 °C*

|                                                                                   |                                                                                     |
|-----------------------------------------------------------------------------------|-------------------------------------------------------------------------------------|
| 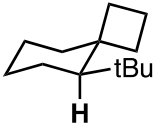 |  |
| Predicted: 1.25 ppm<br>Observed: 1.32 ppm                                         | 0.83 ppm<br>0.88 ppm                                                                |

Compound S22  $^1\text{H}$  NMR (400 MHz,  $d_6$ -Acetone,  $-78\text{ }^\circ\text{C}$ )

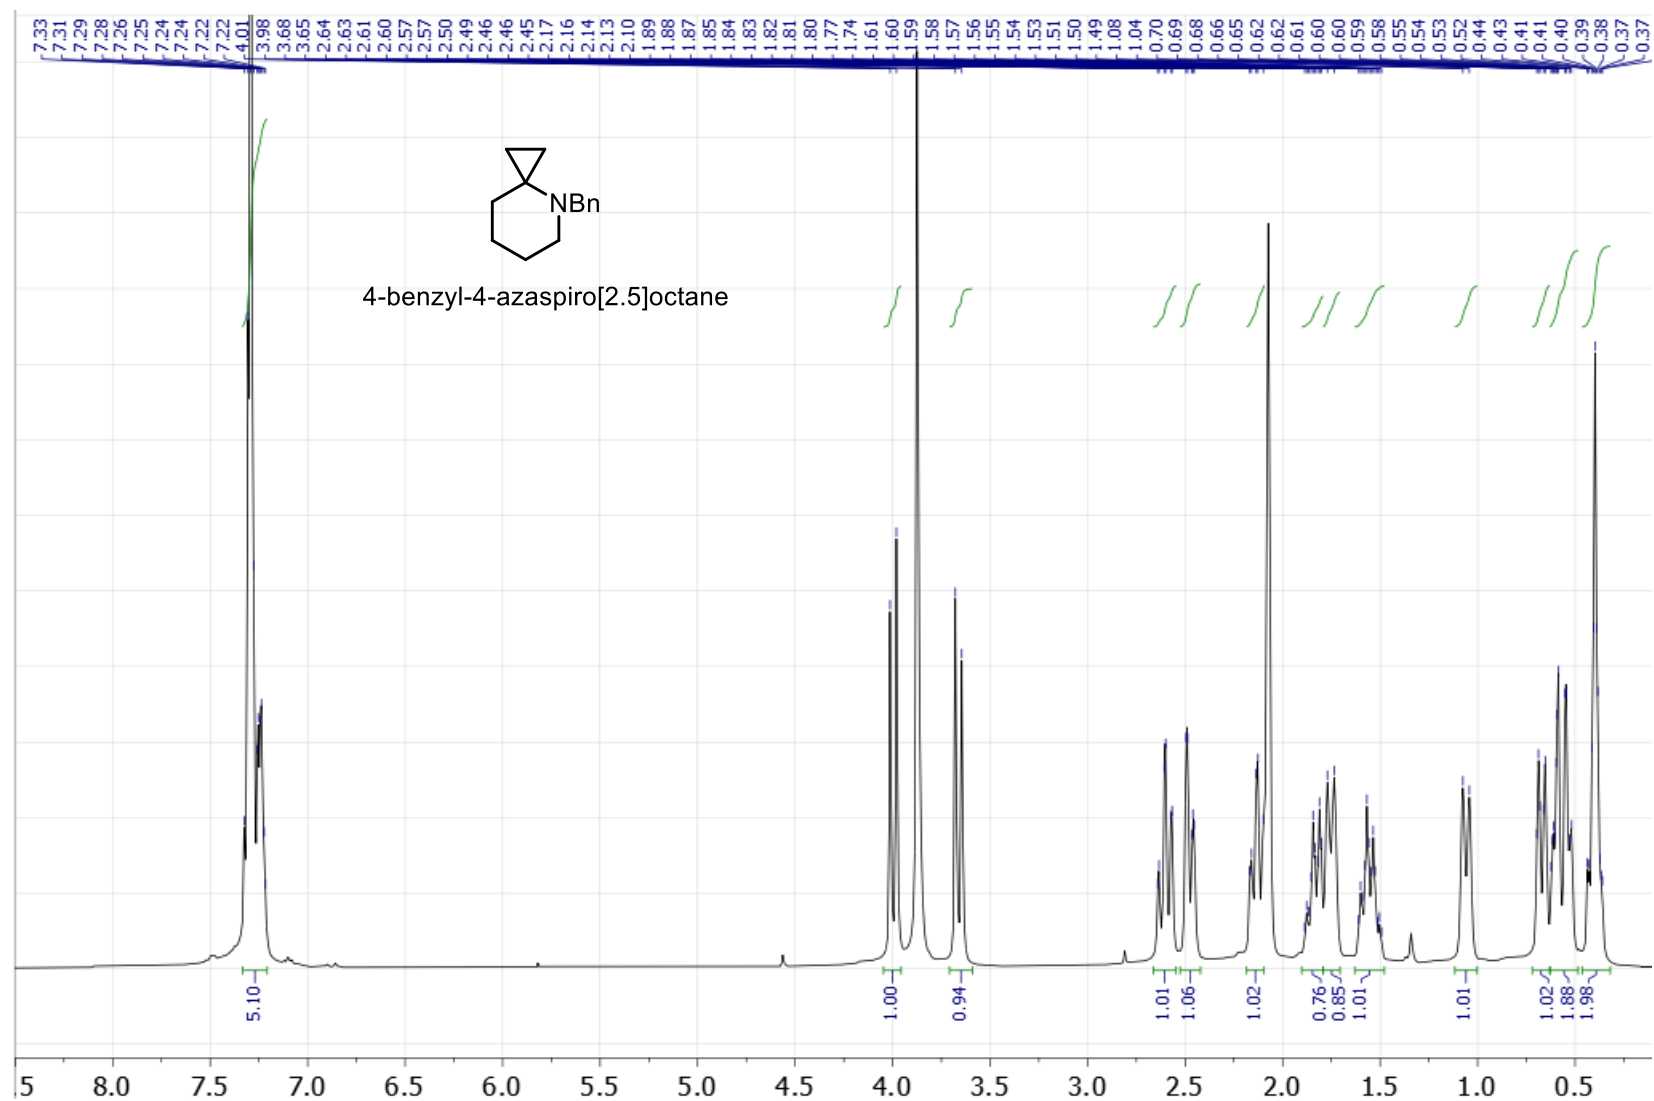

Compound **S22** HSQC (400 MHz, *d*<sub>6</sub>-Acetone, -78 °C)

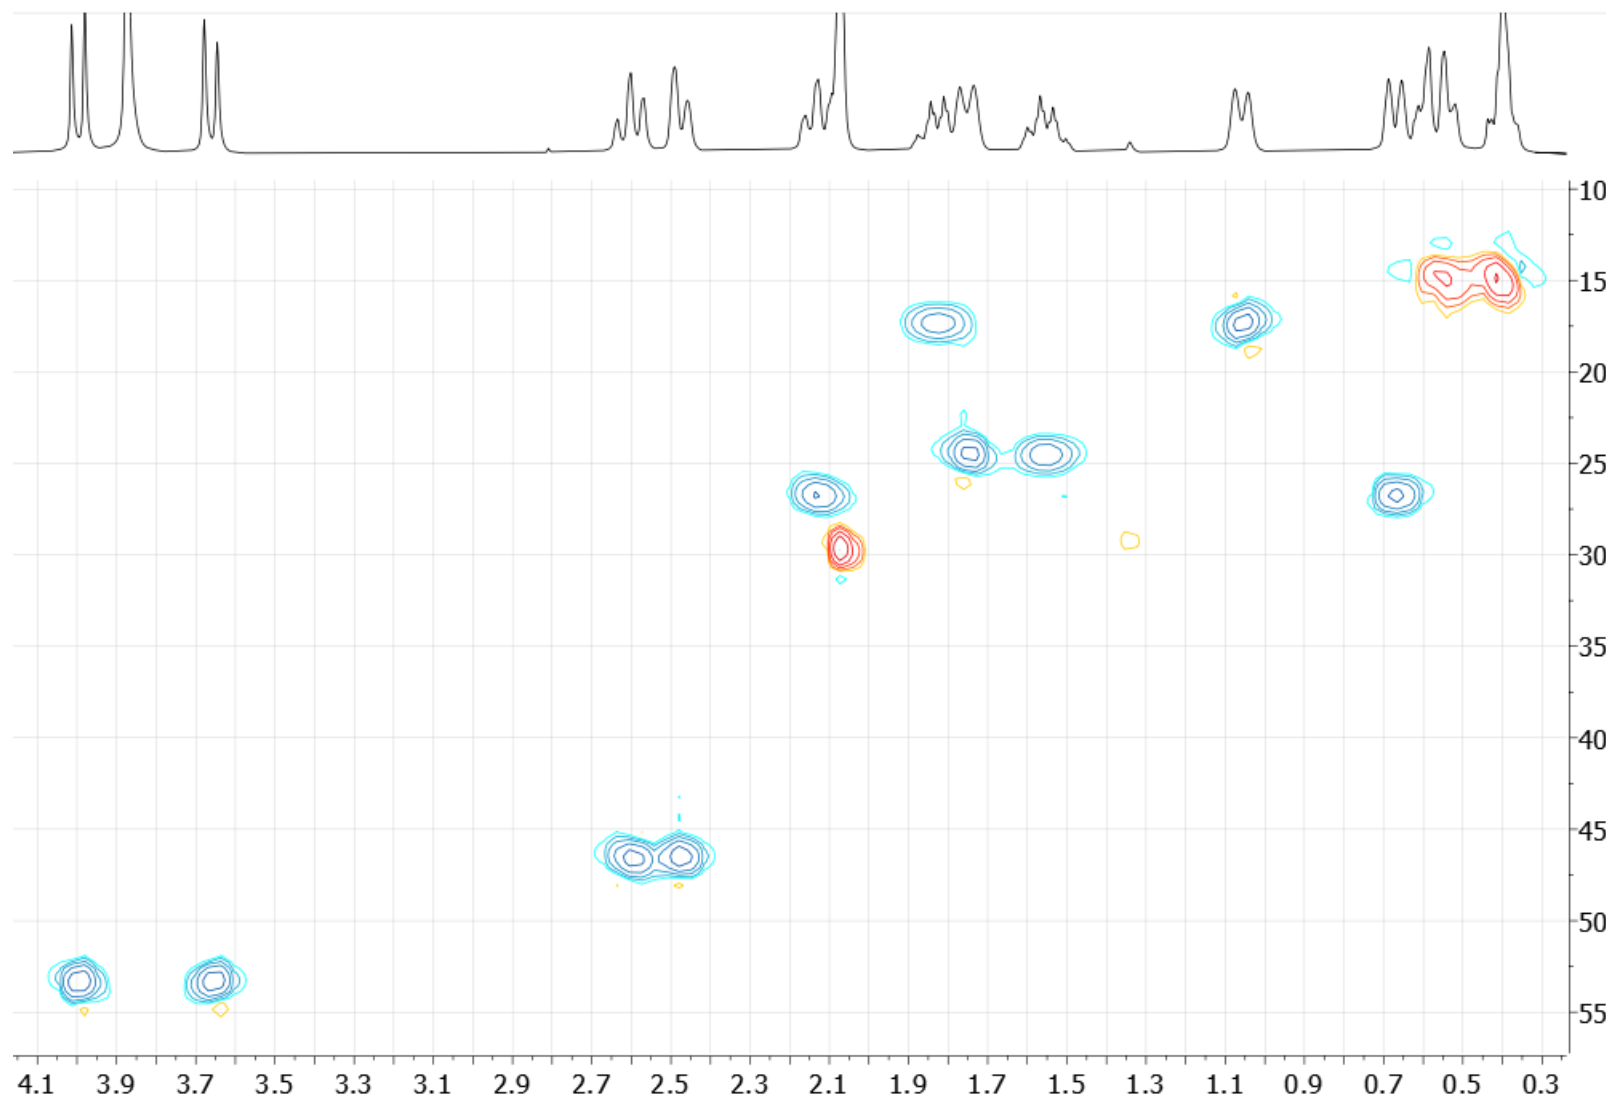

Compound **S22** COSY (400 MHz,  $d_6$ -Acetone, -78 °C)

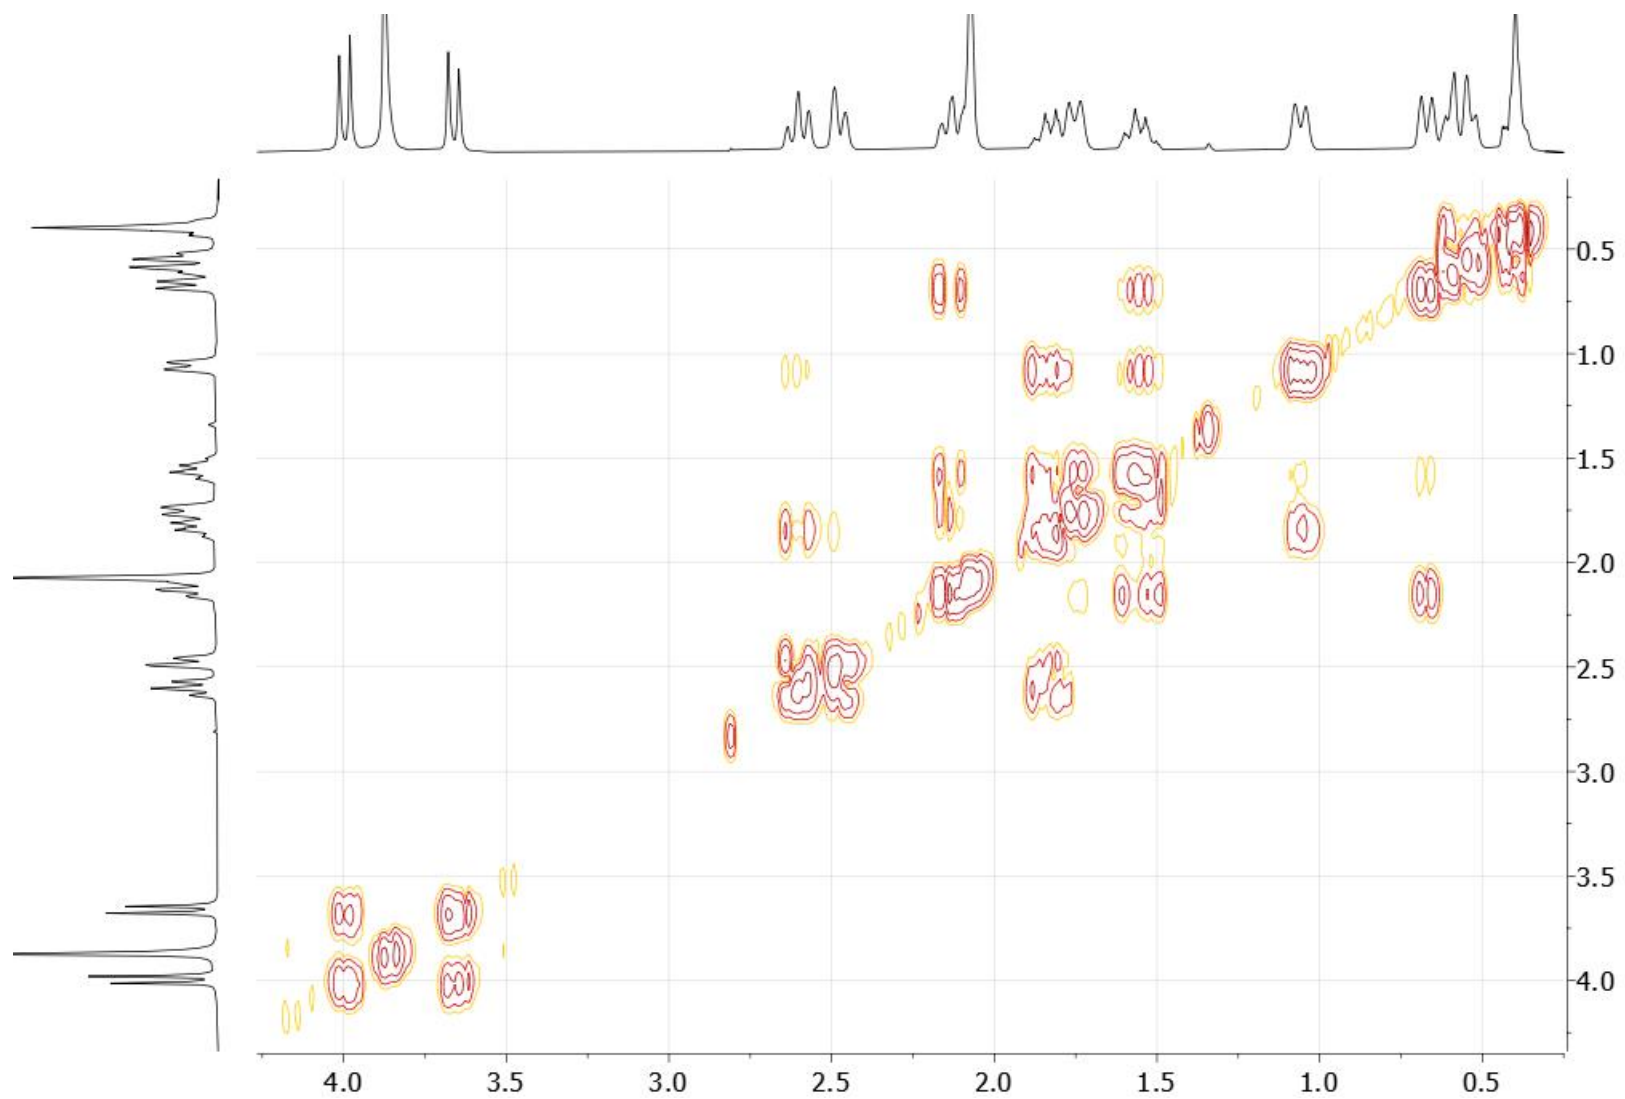

Compound **S22 1D NOE** (irradiation at 3.67 ppm, 400 MHz, *d*<sub>6</sub>-Acetone, -78 °C)

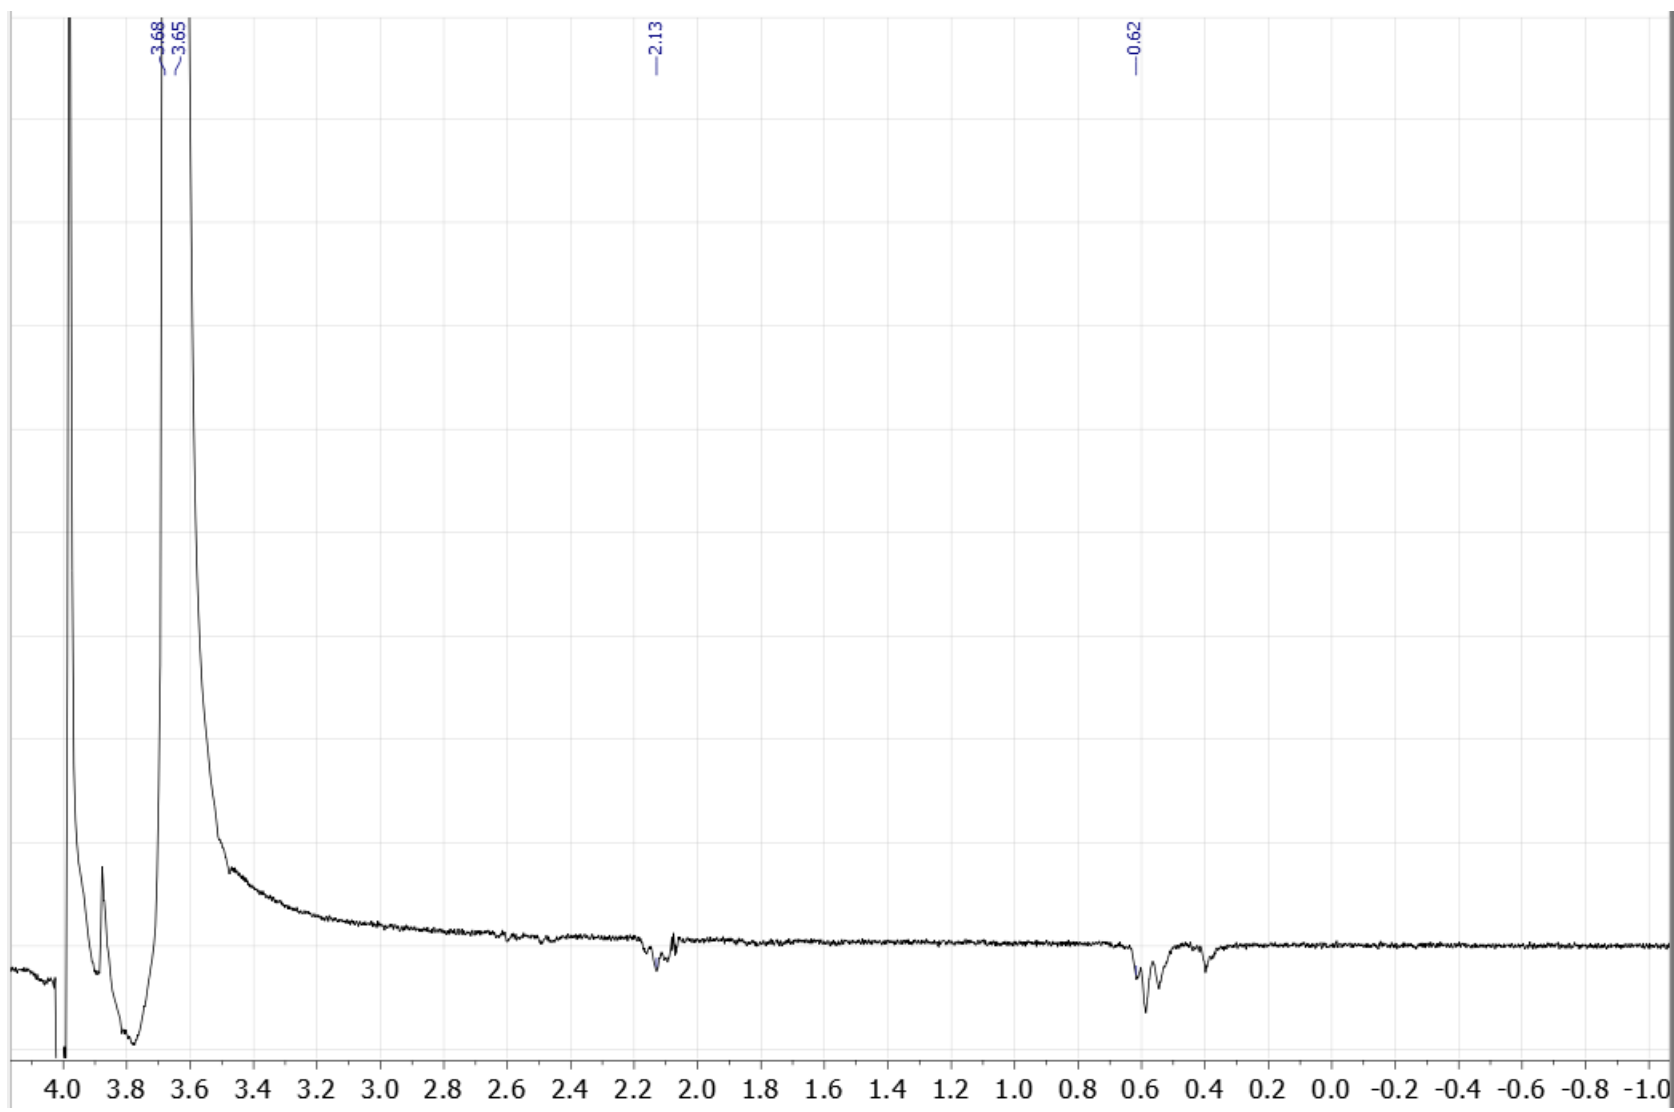



Compound **S22 1D NOE** (irradiation at 3.97 ppm, 400 MHz, *d*<sub>6</sub>-Acetone, -78 °C)

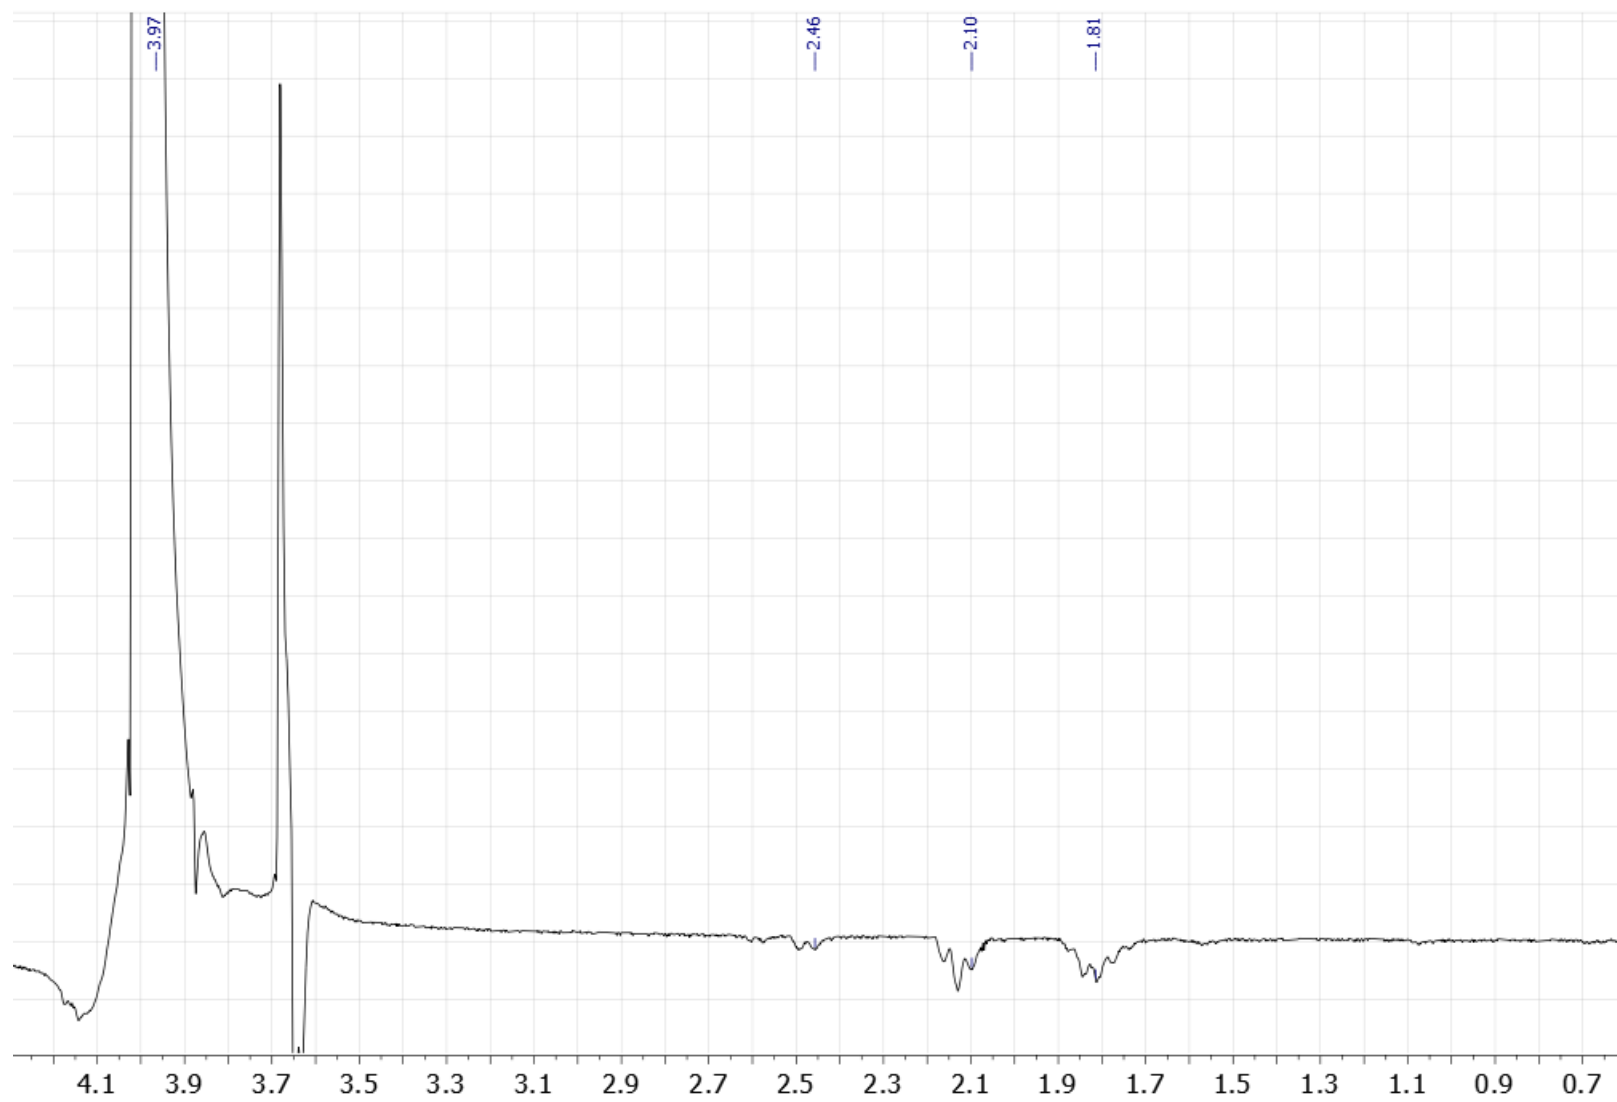

Compound **S23**  $^1\text{H}$  NMR (400 MHz,  $d_6$ -Acetone,  $-78\text{ }^\circ\text{C}$ )

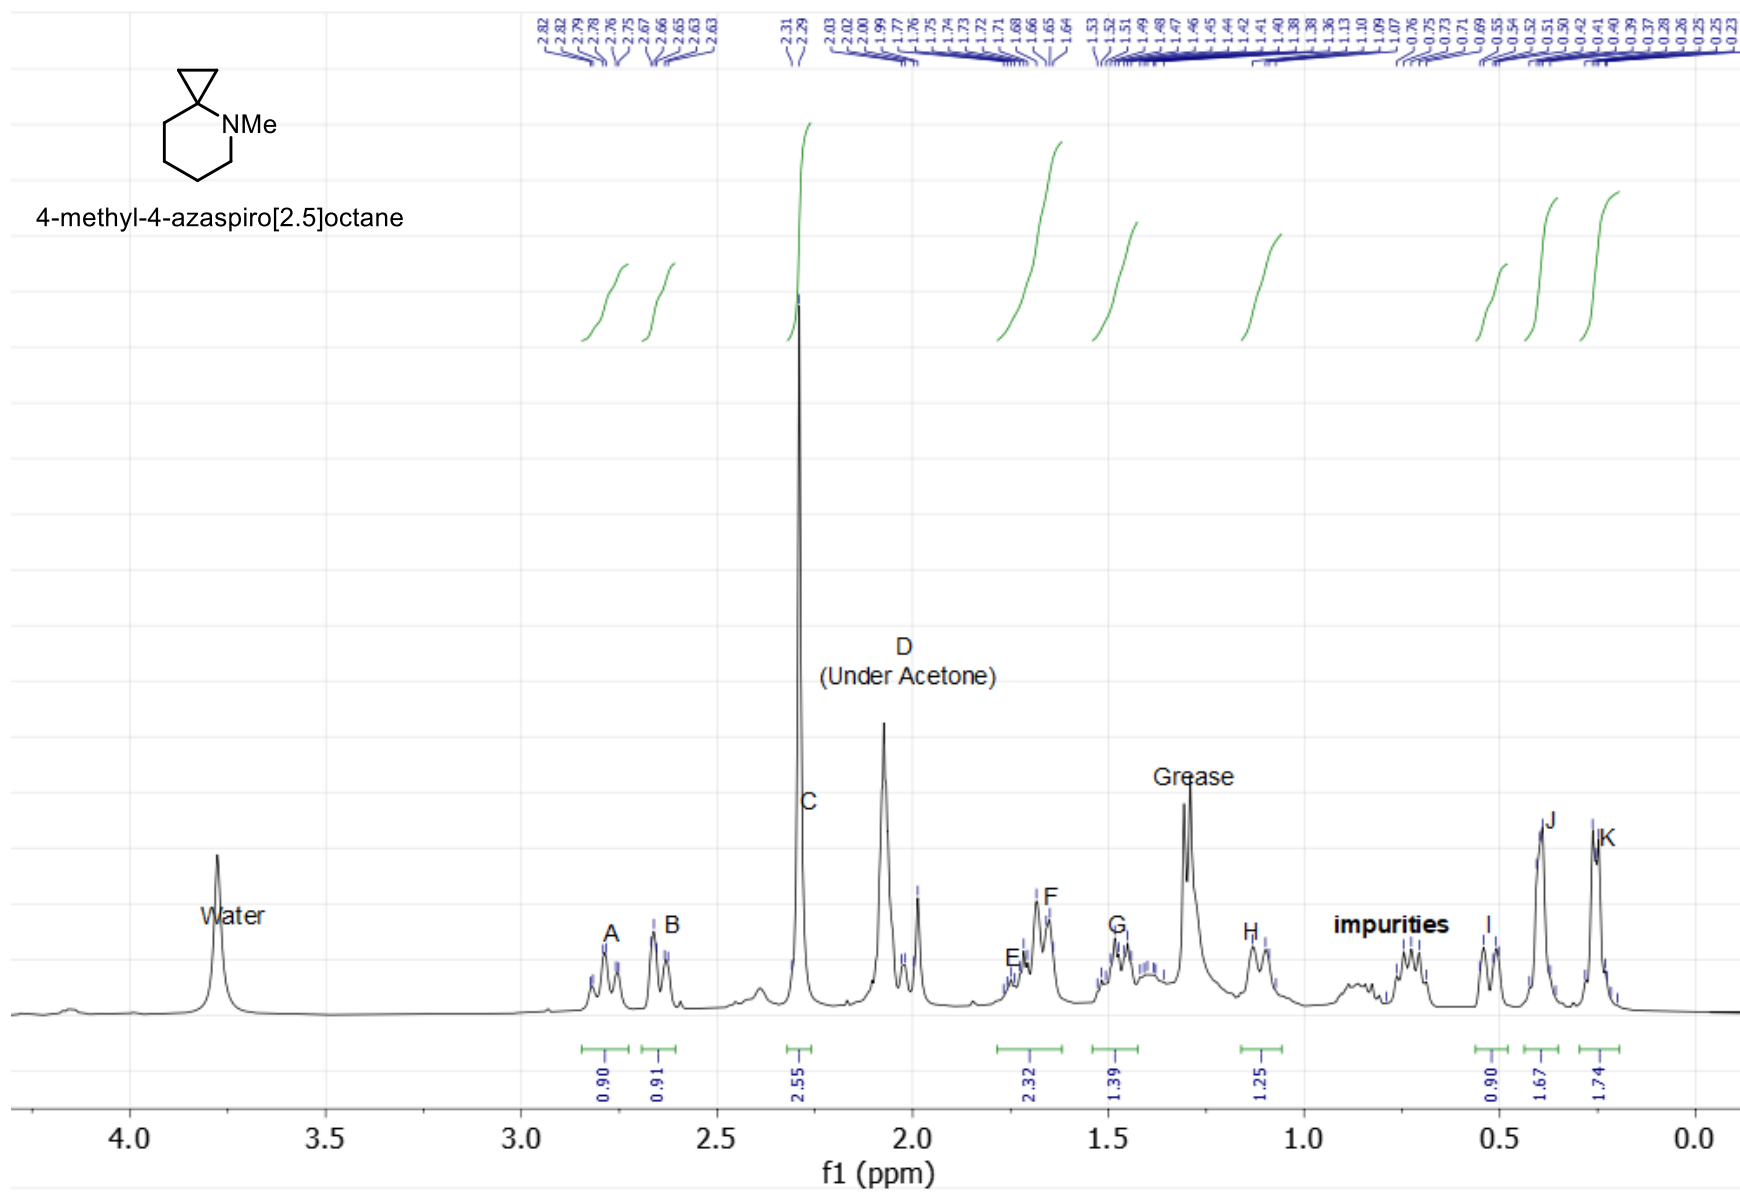

Compound **S23** COSY (400 MHz, *d*<sub>6</sub>-Acetone, -78 °C)

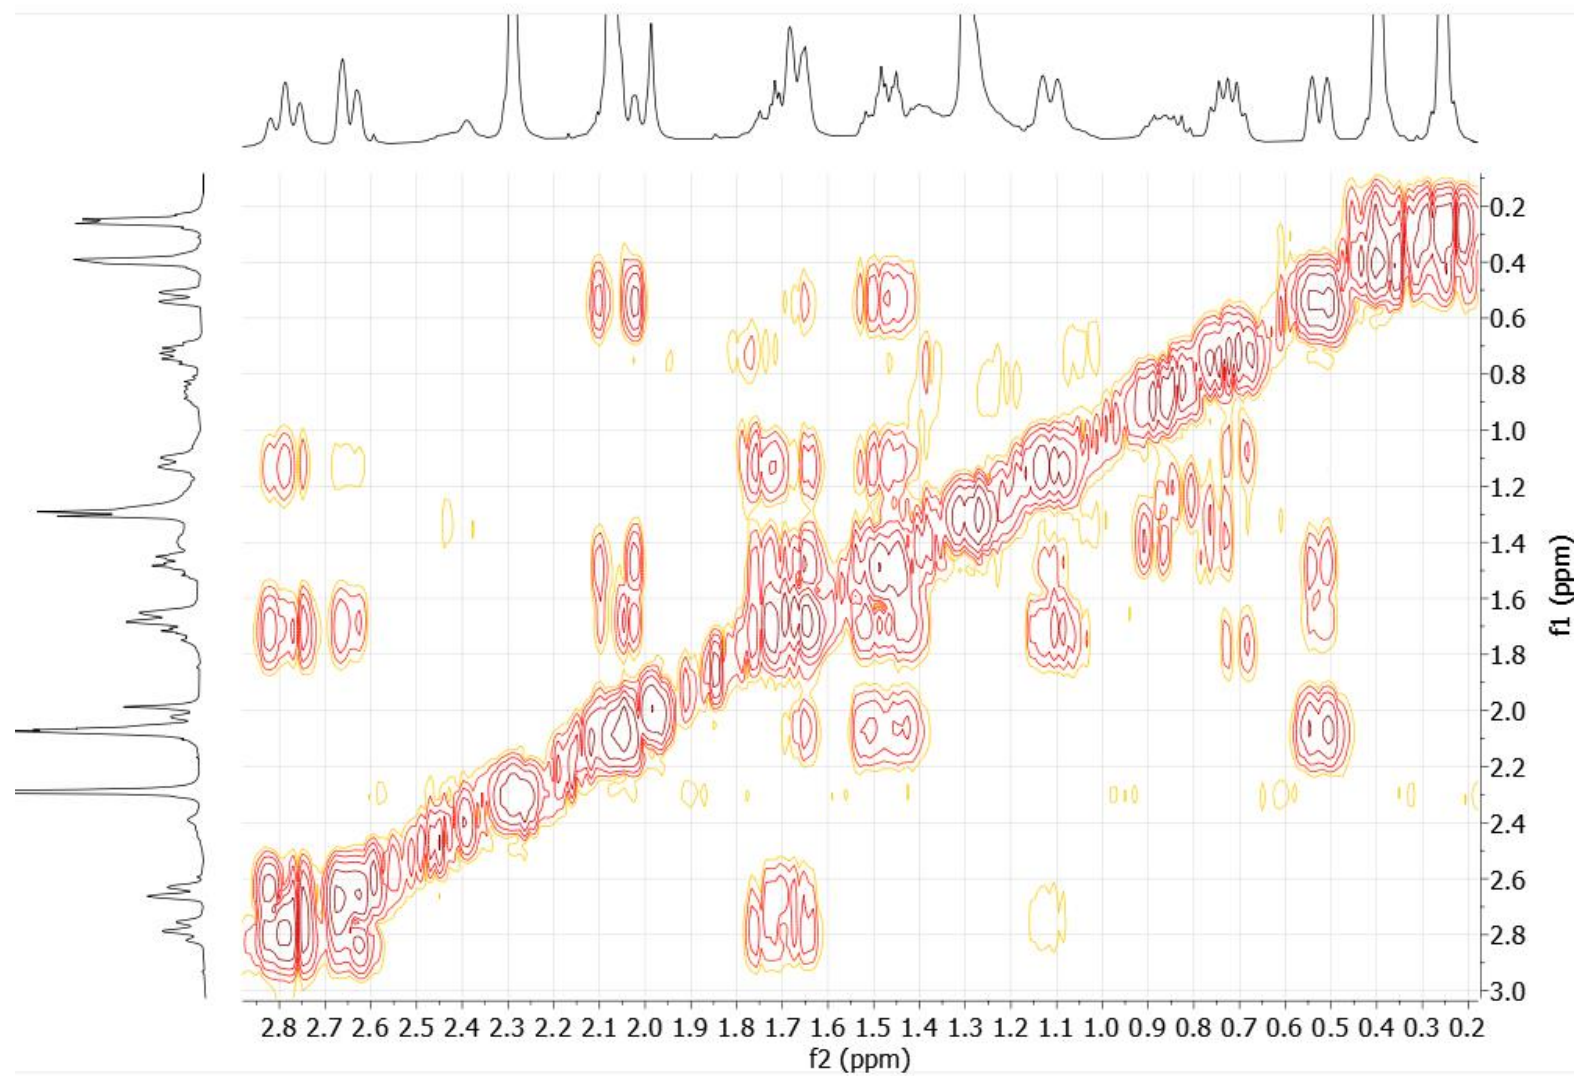

Compound **S23 1D NOE** (400 MHz, *d*<sub>6</sub>-Acetone, -78 °C)

NOE data was very weak though two of the expected correlations were observed similar to in the case of **S22**. However, a lack of complementary evidence led us to support the axial assignment by DFT NMR prediction (see table 3 on the following page)

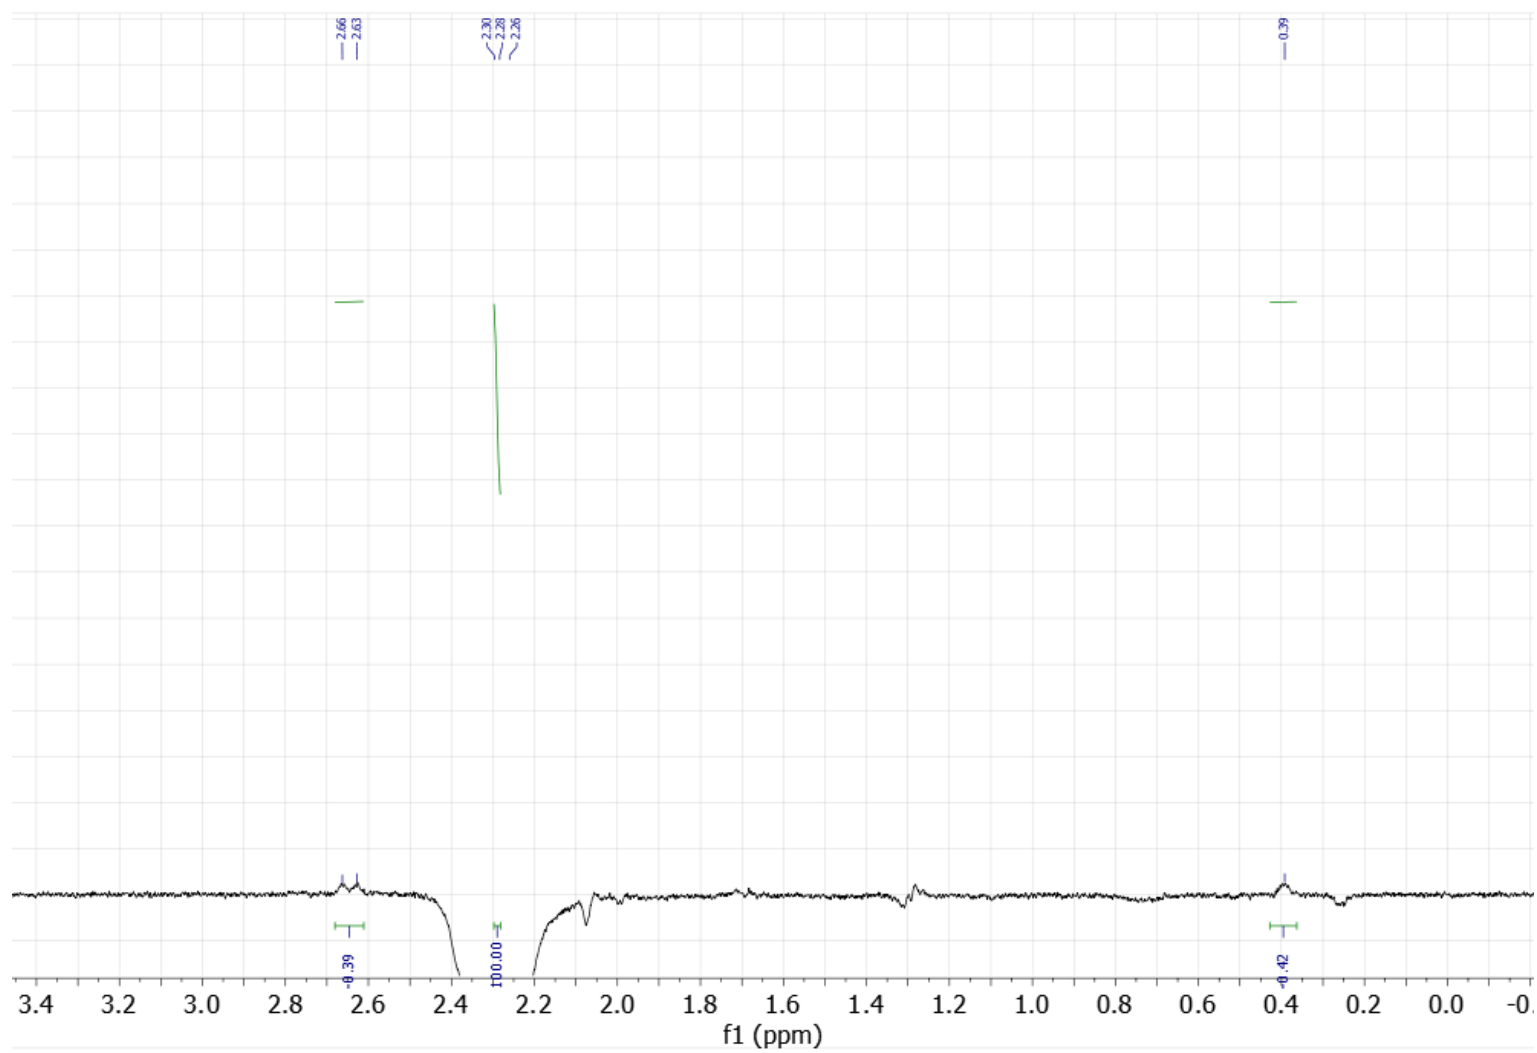

Table 3: Comparison of experimental vs. predicted chemical shifts for axial and equatorial conformations for **S23**

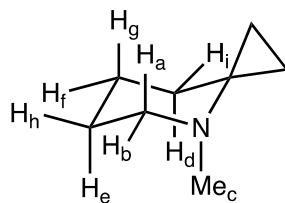

|   | Observed | Predicted Axial | Predicted Equatorial |
|---|----------|-----------------|----------------------|
| a | 2.79     | 3.04            | 2.22                 |
| b | 2.65     | 2.77            | 2.60                 |
| c | 2.29     | 2.45            | 1.95                 |
| d | 2.07     | 2.20            | 1.90                 |
| e | 1.73     | 1.85            | 1.60                 |
| f | 1.67     | 1.70            | 1.60                 |
| g | 1.48     | 1.60            | 1.41                 |
| h | 1.11     | 1.02            | 1.60                 |
| i | 0.53     | 0.48            | 0.81                 |

Compound **S25**  $^1\text{H}$  NMR (400 MHz,  $d_6$ -Acetone,  $-78\text{ }^\circ\text{C}$ )

**NOE experiments were conducted but inconclusive.**

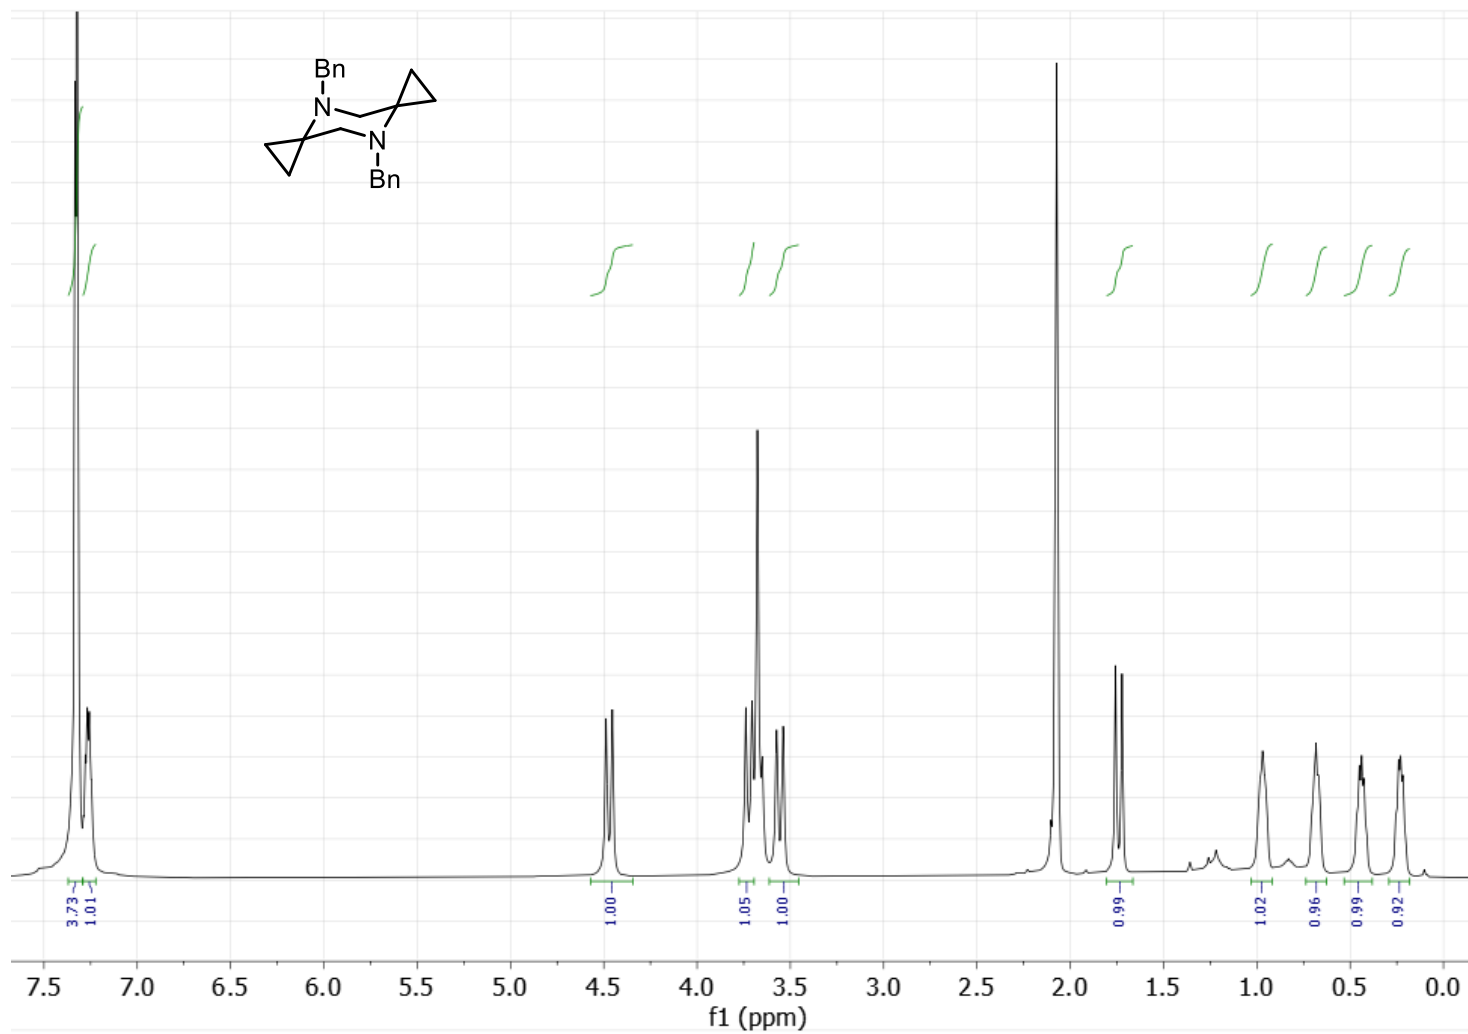

Compound **S25** COSY (400 MHz, *d*<sub>6</sub>-Acetone, -78 °C)

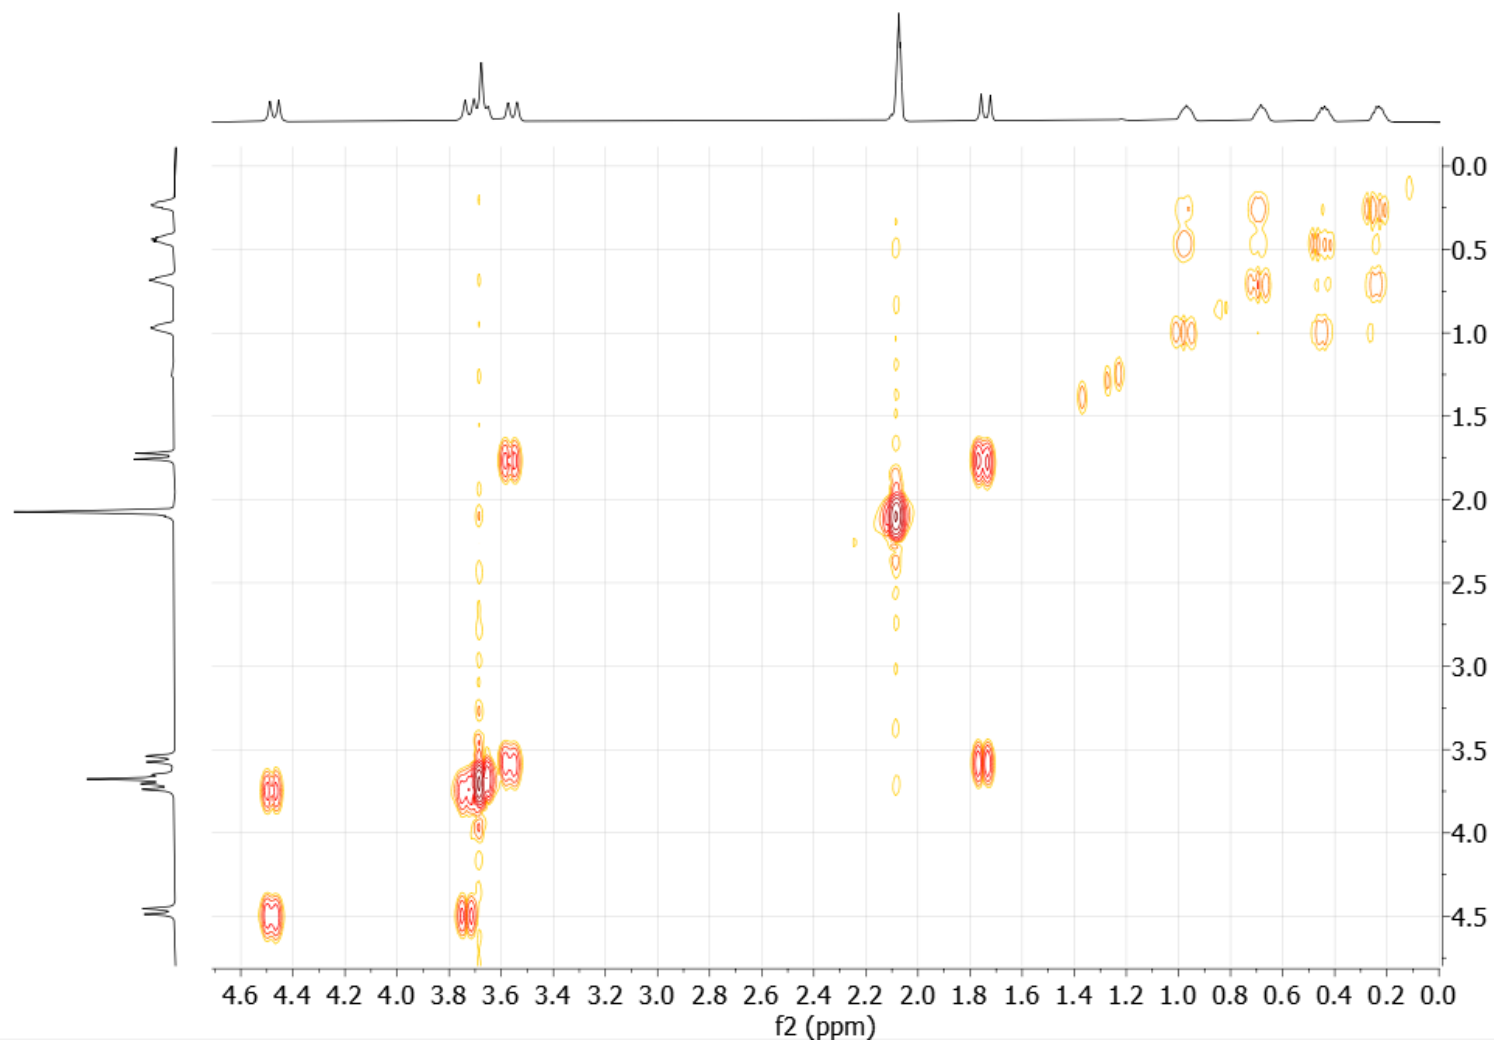

Compound **S26**  $^1\text{H}$  NMR (400 MHz,  $d_6$ -Acetone,  $-78\text{ }^\circ\text{C}$ )

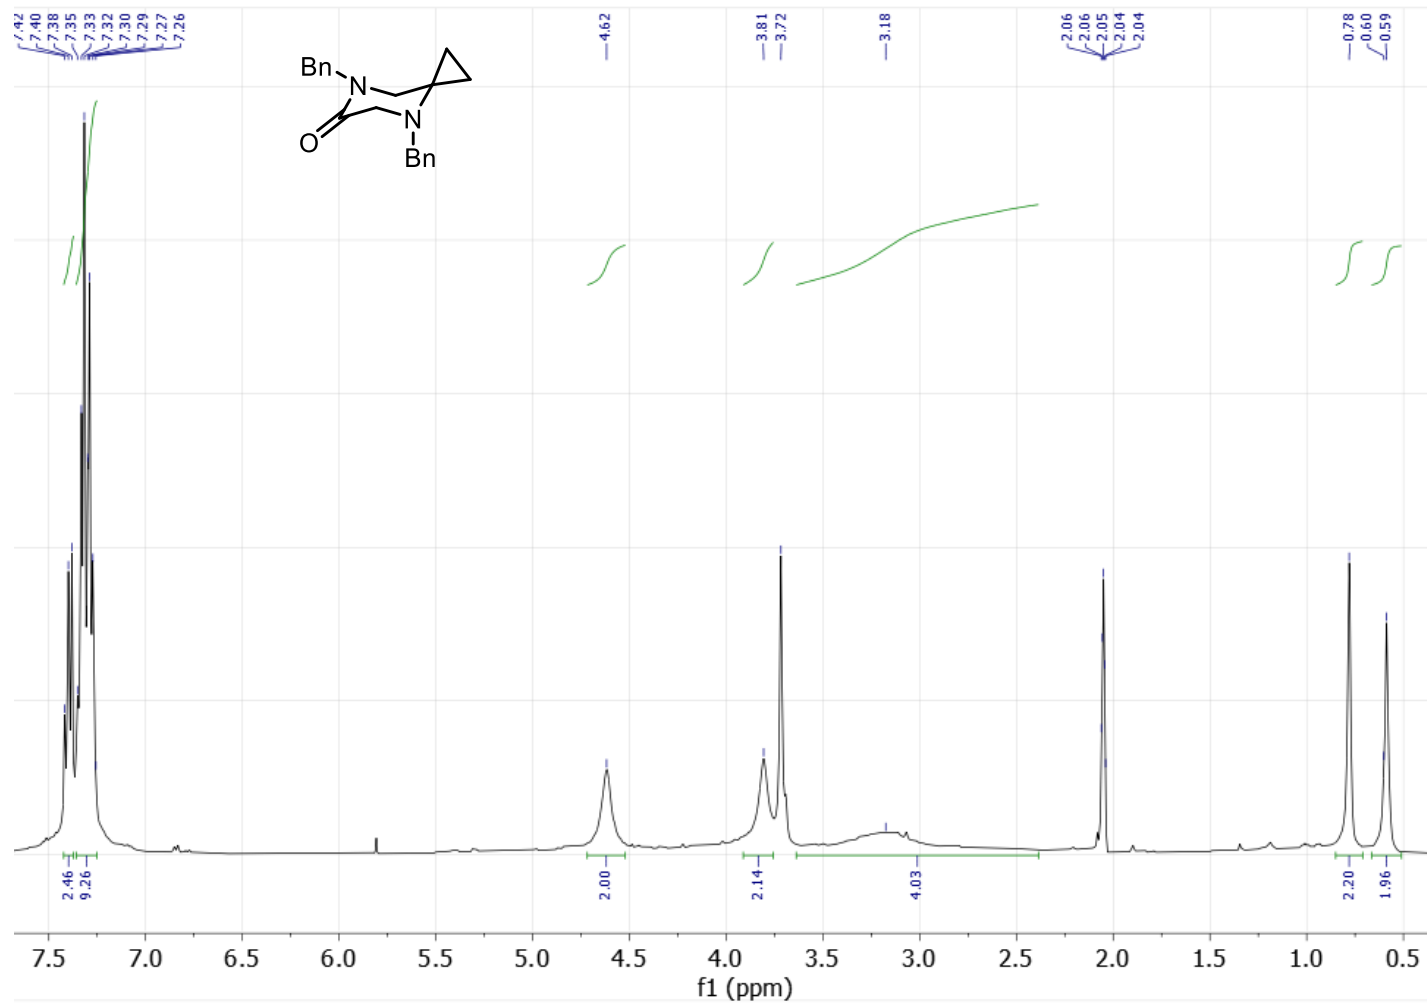



Compound **S27**  $^1\text{H}$  NMR (400 MHz,  $d_6$ -Acetone,  $-78\text{ }^\circ\text{C}$ )

NOE experiments were inconclusive, though they did not reveal any hidden conformers by exchange.

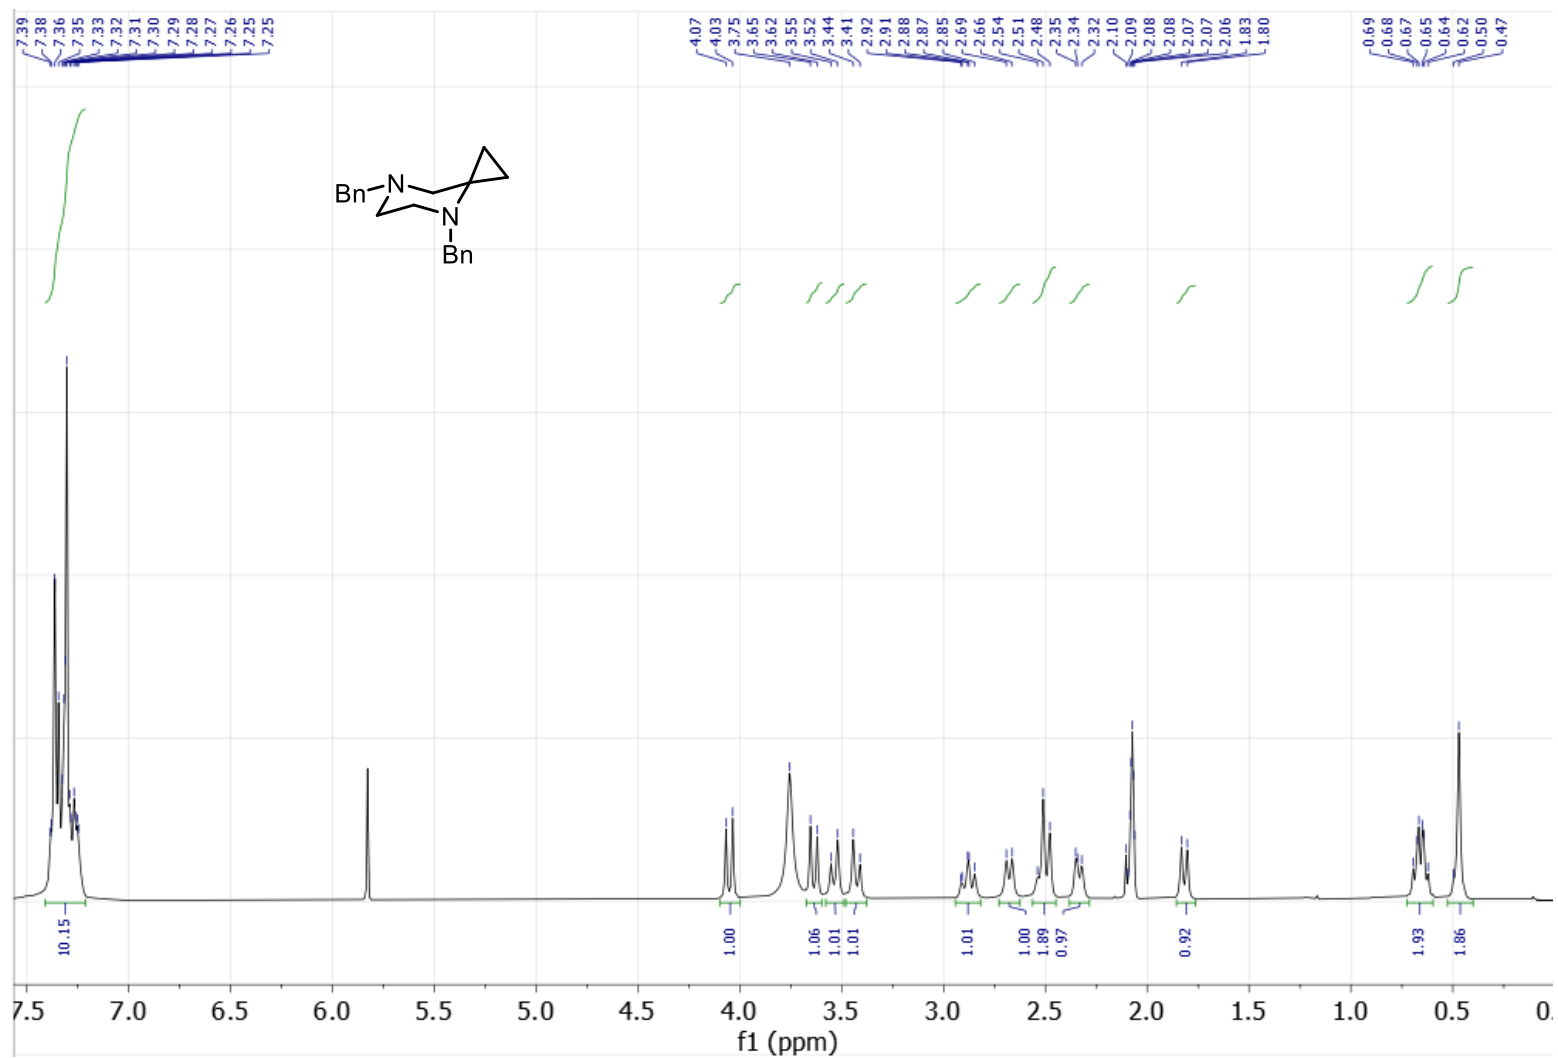

Supplement: d4sc05470a2.pdf [file d4sc05470a2.pdf]
