# Supplementary material for: Driving tert -butyl axial: the surprising cyclopropyl effect
Source: Royal Society of Chemistry journal article supplement (doi:10.1039/d4sc05470a), 2024-01-01
Supplement: d4sc05470a1.pdf [file d4sc05470a1.pdf]

## Driving *tert*-Butyl Axial: The Surprising Cyclopropyl Effect

Anthony R. Izzotti and James L. Gleason

### Table of Contents

|                                       |                |
|---------------------------------------|----------------|
| <b>Computational Data Methods</b>     | <b>2</b>       |
| <b>Benchmarking</b>                   | <b>3</b>       |
| <b>NMR Calculation Summary Tables</b> | <b>4</b>       |
| <b>Cyclohexane Compounds</b>          | <b>5-349</b>   |
| <b>Acyclic Compounds</b>              | <b>350-355</b> |
| <b>Nitrogen Heterocycles</b>          | <b>355-369</b> |
| <b>Butane Models</b>                  | <b>369-371</b> |

## Computational Data Methods

All DFT calculations were conducted using Gaussian 16, Revision B.01, primarily on the Digital Research Alliance of Canada Cluster.<sup>1</sup> Structure optimizations and frequency calculations were all performed at the M06-2X/6-311++G(2d,2p) level with the default integration grid and using acetone solvation (except where noted) using the SMD model.

All stationary points were confirmed to have zero negative eigenvalues. Thermal free energies were converted to 1 M standard state using the correction of Truhlar: (free energies prior to correction are listed below).<sup>2</sup>

Conformational analysis for appropriate side chains was conducted either by examining all possible staggered conformations or through use of rotational scans using modified redundant coordinates to identify likely stable structures, which were then minimized.

A-values were calculated using a Boltzmann population analysis of all identified stable conformations using GoodVibes<sup>3</sup>.

Shifts were calculated using the GIAO method at the B3LYP/6-311+G(2d,p) level with SCRF=acetone, referenced to TMS, as implemented in Gaussian and GaussView.<sup>4</sup> Shifts were estimated using a Boltzmann distribution of all chair conformers.

NBO-STERIC calculations were performed as implemented in Gaussian. Energies were the total disjoint NLMO steric exchange energy from pairwise sum, as this best represents steric contacts.<sup>5</sup>

### References:

1. Gaussian 16, Revision B.01, M. J. Frisch, G. W. Trucks, H. B. Schlegel, G. E. Scuseria, M. A. Robb, J. R. Cheeseman, G. Scalmani, V. Barone, G. A. Petersson, H. Nakatsuji, X. Li, M. Caricato, A. V. Marenich, J. Bloino, B. G. Janesko, R. Gomperts, B. Mennucci, H. P. Hratchian, J. V. Ortiz, A. F. Izmaylov, J. L. Sonnenberg, D. Williams-Young, F. Ding, F. Lipparini, F. Egidi, J. Goings, B. Peng, A. Petrone, T. Henderson, D. Ranasinghe, V. G. Zakrzewski, J. Gao, N. Rega, G. Zheng, W. Liang, M. Hada, M. Ehara, K. Toyota, R. Fukuda, J. Hasegawa, M. Ishida, T. Nakajima, Y. Honda, O. Kitao, H. Nakai, T. Vreven, K. Throssell, J. A. Montgomery, Jr., J. E. Peralta, F. Ogliaro, M. J. Bearpark, J. J. Heyd, E. N. Brothers, K. N. Kudin, V. N. Staroverov, T. A. Keith, R. Kobayashi, J. Normand, K. Raghavachari, A. P. Rendell, J. C. Burant, S. S. Iyengar, J. Tomasi, M. Cossi, J. M. Millam, M. Klene, C. Adamo, R. Cammi, J. W. Ochterski, R. L. Martin, K. Morokuma, O. Farkas, J. B. Foresman, and D. J. Fox, Gaussian, Inc., Wallingford CT, 2016
2. Zhao, Y.; Truhlar, D.G. *Phys. Chem. Chem. Phys.* **2008**, *10*, 2813-2818
3. Luchini, G.; Alegre-Requena, J. V.; Funes-Ardoiz, I.; Paton, R. S. *F1000Research*, **2020**, *9*, 291
4. Wolinski, K.; Haacke, R.; Hinton, J. F.; Pulay, P. *J. Comp. Chem.* **1997**, *18*, 816-825)
5. [https://nbo6.chem.wisc.edu/ex\\_ster.htm](https://nbo6.chem.wisc.edu/ex_ster.htm)

## Benchmarking

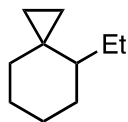

| Theory level             | A-value        |
|--------------------------|----------------|
| Experimental             | -0.46 kcal/mol |
| M06-2X/6-311++G(2d,2p)   | -0.89 kcal/mol |
| B3LYP-D3/6-311++G(2d,2p) | -0.85 kcal/mol |
| wB97XD/6-311++G(2d,2p)   | -1.01 kcal/mol |
| MP2/6-311++G(2d,2p)      | -1.07 kcal/mol |

## NMR Calculation Summaries

Table 1: Predicted NMR for spirocyclobutyl-tert-butyl hexane

|                                                                                   |                                                                                    |
|-----------------------------------------------------------------------------------|------------------------------------------------------------------------------------|
| 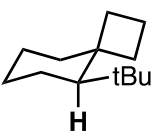 |  |
| Predicted: 1.25 ppm<br>Observed: 1.32 ppm                                         | 0.83 ppm<br>0.88 ppm                                                               |

Table 2: Predicted NMR for spirocyclobutanone-tert-butyl-hexane

|                                                                                   |                                                                                    |
|-----------------------------------------------------------------------------------|------------------------------------------------------------------------------------|
| 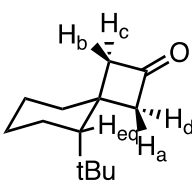 |  |
| Predicted    Observed                                                             | Predicted    Observed                                                              |
| H <sub>ax</sub> 1.52 ppm    1.64 ppm                                              | H <sub>eq</sub> 1.34 ppm    1.36 ppm                                               |
| H <sub>a</sub> 3.39 ppm    3.38 ppm                                               | H <sub>a</sub> 3.63 ppm    3.46 ppm                                                |
| H <sub>b</sub> 2.72 ppm    2.75 ppm                                               | H <sub>b</sub> 3.19 ppm    3.04 ppm                                                |
| H <sub>c</sub> 2.92 ppm    2.85 ppm                                               | H <sub>c</sub> 2.63 ppm    2.65 ppm                                                |
| H <sub>d</sub> 2.46 ppm    2.52 ppm                                               | H <sub>d</sub> 2.43 ppm    2.51 ppm                                                |

Table 3: Predicted NMR for spirocyclopropyl N-methyl piperidine

|                                                                                     |                    |                         |      |
|-------------------------------------------------------------------------------------|--------------------|-------------------------|------|
| 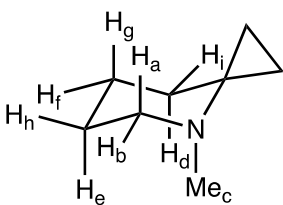 |                    |                         |      |
| Observed                                                                            | Predicted<br>Axial | Predicted<br>Equatorial |      |
| a                                                                                   | 2.79               | 3.04                    | 2.22 |
| b                                                                                   | 2.65               | 2.77                    | 2.60 |
| c                                                                                   | 2.29               | 2.45                    | 1.95 |
| d                                                                                   | 2.07               | 2.20                    | 1.90 |
| e                                                                                   | 1.73               | 1.85                    | 1.60 |
| f                                                                                   | 1.67               | 1.70                    | 1.60 |
| g                                                                                   | 1.48               | 1.60                    | 1.41 |
| h                                                                                   | 1.11               | 1.02                    | 1.60 |
| i                                                                                   | 0.53               | 0.48                    | 0.81 |

## Energy Summary and co-ordinates for DFT calculations

### Cyclohexane Compounds

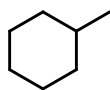

methylcyclohexane

| Conformation | Electronic Energy | Enthalpy    | Gibbs Free Energy |
|--------------|-------------------|-------------|-------------------|
| ax           | -275.140397       | -274.933337 | -274.971701       |
| eq           | -275.143008       | -274.93627  | -274.974815       |

ax

| ===== |           |           |           |
|-------|-----------|-----------|-----------|
| C     | 0.334823  | -0.597813 | 1.257164  |
| C     | -0.323549 | -1.184490 | -0.000000 |
| H     | -0.142246 | -2.262501 | -0.000000 |
| C     | 0.334823  | -0.597813 | -1.257164 |
| C     | 0.334823  | 0.932564  | -1.260544 |
| H     | 0.848624  | 1.299288  | -2.151042 |
| H     | -0.691833 | 1.304950  | -1.315608 |
| C     | 0.334823  | 0.932564  | 1.260544  |
| C     | 1.003024  | 1.482481  | 0.000000  |
| H     | 0.975260  | 2.573688  | 0.000000  |
| H     | 2.058219  | 1.189551  | 0.000000  |
| H     | 1.372008  | -0.944375 | -1.303737 |
| H     | -0.691833 | 1.304950  | 1.315608  |
| H     | 0.848624  | 1.299288  | 2.151042  |
| H     | -0.168379 | -0.978756 | -2.149014 |
| H     | -0.168379 | -0.978756 | 2.149014  |
| H     | 1.372008  | -0.944375 | 1.303737  |
| C     | -1.838934 | -0.978870 | -0.000000 |
| H     | -2.290274 | -1.435894 | -0.882655 |
| H     | -2.290274 | -1.435894 | 0.882655  |
| H     | -2.110511 | 0.077093  | -0.000000 |

eq

| ===== |           |           |           |
|-------|-----------|-----------|-----------|
| C     | -0.089893 | 0.325574  | 1.254644  |
| C     | 0.576846  | 0.895270  | -0.000000 |
| H     | 1.623198  | 0.567789  | -0.000000 |
| C     | -0.089893 | 0.325574  | -1.254644 |
| C     | -0.089893 | -1.202997 | -1.259474 |
| H     | -0.594959 | -1.577603 | -2.151659 |
| H     | 0.943687  | -1.560853 | -1.304770 |
| C     | -0.089893 | -1.202997 | 1.259474  |
| C     | -0.755091 | -1.757609 | 0.000000  |
| H     | -0.717680 | -2.848459 | 0.000000  |
| H     | -1.812524 | -1.473944 | 0.000000  |

|   |           |           |           |
|---|-----------|-----------|-----------|
| H | -1.124372 | 0.686542  | -1.292131 |
| H | 0.943687  | -1.560853 | 1.304770  |
| H | -0.594959 | -1.577603 | 2.151659  |
| H | 0.412072  | 0.709011  | -2.146233 |
| H | 0.412072  | 0.709011  | 2.146233  |
| H | -1.124372 | 0.686542  | 1.292131  |
| C | 0.544740  | 2.418903  | -0.000000 |
| H | 1.040081  | 2.826148  | 0.883311  |
| H | 1.040081  | 2.826148  | -0.883311 |
| H | -0.487553 | 2.777811  | -0.000000 |

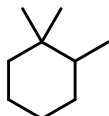

1,1,2-trimethylcyclohexane

| Conformation | Electronic Energy | Enthalpy    | Gibbs Free Energy |
|--------------|-------------------|-------------|-------------------|
| ax           | -353.754171       | -353.488235 | -353.531685       |
| eq           | -353.756151       | -353.490499 | -353.534483       |

ax

```

=====
C  0.883008   -0.275843   0.056083
C  0.114592    0.983327   0.543919
H  0.642340    1.351753   1.429993
C -1.321345    0.630322   0.967562
C -2.097589   -0.082442  -0.140618
H -3.100880   -0.331511   0.209690
H -2.220090    0.586899  -0.996970
C  0.067038   -1.014731  -1.021378
C -1.362076   -1.344550  -0.589321
H -1.894734   -1.821515  -1.414159
H -1.347130   -2.065048   0.232914
H -1.299984   -0.012993   1.850110
H  0.025260   -0.393499  -1.921120
H  0.600615   -1.928033  -1.299102
H -1.839609    1.545472   1.262336
C  0.105384    2.122882  -0.480744
H -0.538933    2.932500  -0.133072
H  1.101861    2.537267  -0.629315
H -0.267605    1.799971  -1.453620
C  1.149476   -1.208038   1.245441
H  1.678017   -2.103934   0.912285
H  1.775739   -0.706112   1.986550
H  0.236653   -1.528928   1.744645
C  2.240813    0.110922  -0.535638
H  2.817841    0.714830   0.169381
H  2.820906   -0.786492  -0.761822
H  2.133920    0.678288  -1.460562

```

NBO Steric Energy: 273.58

eq

|   |           |           |           |
|---|-----------|-----------|-----------|
| C | 0.623325  | -0.589989 | -0.020794 |
| C | 0.391580  | 0.894131  | -0.410204 |
| H | 0.304609  | 0.906109  | -1.503793 |
| C | -0.926709 | 1.441461  | 0.151168  |
| C | -2.131241 | 0.593131  | -0.247691 |
| H | -3.042658 | 0.995732  | 0.198120  |
| H | -2.258892 | 0.640383  | -1.334021 |
| C | -0.624089 | -1.403491 | -0.416540 |
| C | -1.927757 | -0.862331 | 0.165342  |
| H | -2.765533 | -1.474597 | -0.173601 |
| H | -1.908204 | -0.932111 | 1.256404  |
| H | -0.862372 | 1.491990  | 1.242711  |
| H | -0.702861 | -1.398381 | -1.509440 |
| H | -0.475242 | -2.444056 | -0.115796 |
| H | -1.057546 | 2.468424  | -0.198346 |
| C | 1.541360  | 1.822095  | -0.021206 |
| H | 2.501030  | 1.483503  | -0.411426 |
| H | 1.361144  | 2.824729  | -0.412809 |
| H | 1.627852  | 1.906072  | 1.063822  |
| C | 0.903572  | -0.751584 | 1.478226  |
| H | 0.967351  | -1.812439 | 1.730988  |
| H | 1.853874  | -0.290820 | 1.751195  |
| H | 0.126895  | -0.308642 | 2.101421  |
| C | 1.814237  | -1.161428 | -0.795805 |
| H | 2.754860  | -0.695368 | -0.501116 |
| H | 1.905470  | -2.233856 | -0.608170 |
| H | 1.684554  | -1.018644 | -1.871122 |

NBO Steric Energy: 270.86

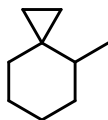

4-methylspiro[2.5]octane

| Conformation | Electronic Energy | Enthalpy    | Gibbs Free Energy |
|--------------|-------------------|-------------|-------------------|
| ax           | -352.525015       | -352.282452 | -352.324709       |
| eq           | -352.524767       | -352.28219  | -352.324561       |

ax

|   |           |           |           |
|---|-----------|-----------|-----------|
| C | -0.835669 | -0.138166 | -0.053987 |
| C | -0.018318 | 1.074267  | 0.368904  |

|   |           |           |           |
|---|-----------|-----------|-----------|
| H | -0.593301 | 1.611386  | 1.128592  |
| C | -1.778128 | -0.723412 | 0.958418  |
| C | -2.311346 | 0.031195  | -0.238258 |
| C | 1.297815  | 0.603220  | 1.006227  |
| C | 2.070652  | -0.363613 | 0.105111  |
| H | 2.397010  | 0.152727  | -0.801804 |
| H | 2.974563  | -0.698909 | 0.616560  |
| C | -0.093304 | -1.111809 | -0.947682 |
| C | 1.207768  | -1.565345 | -0.282871 |
| H | 0.965611  | -2.138214 | 0.617886  |
| H | 1.760327  | -2.231142 | -0.948013 |
| C | 0.219645  | 2.035892  | -0.796222 |
| H | 0.794583  | 1.571974  | -1.598000 |
| H | -0.728755 | 2.371431  | -1.219156 |
| H | -1.848530 | -0.240991 | 1.923869  |
| H | -1.905523 | -1.797359 | 0.970914  |
| H | -2.796009 | -0.541722 | -1.017042 |
| H | -2.731255 | 1.012469  | -0.061727 |
| H | 1.067371  | 0.093497  | 1.946743  |
| H | -0.734469 | -1.968586 | -1.164589 |
| H | 0.136447  | -0.634666 | -1.905443 |
| H | 1.917623  | 1.467902  | 1.253911  |
| H | 0.769622  | 2.916826  | -0.460541 |

NBO Steric Energy: 240.47

eq

```
=====
```

|   |           |           |           |
|---|-----------|-----------|-----------|
| C | -0.566591 | -0.531872 | -0.179370 |
| C | -0.311420 | 0.952436  | -0.431199 |
| H | -0.100645 | 1.054546  | -1.502963 |
| C | -1.355557 | -0.969825 | 1.022558  |
| C | -1.924852 | -1.137247 | -0.367585 |
| C | 0.950951  | 1.382188  | 0.327874  |
| C | 2.163426  | 0.523358  | -0.027296 |
| H | 2.409509  | 0.672812  | -1.083457 |
| H | 3.033092  | 0.842236  | 0.549977  |
| C | 0.626479  | -1.395722 | -0.545240 |
| C | 1.878500  | -0.958166 | 0.213588  |
| H | 1.724353  | -1.126299 | 1.284024  |
| H | 2.734299  | -1.565166 | -0.086858 |
| C | -1.474205 | 1.878886  | -0.093124 |
| H | -1.704257 | 1.856468  | 0.973490  |
| H | -1.210052 | 2.906290  | -0.347667 |
| H | -1.805951 | -0.218611 | 1.655135  |
| H | -1.021857 | -1.858920 | 1.540153  |
| H | -1.967285 | -2.138480 | -0.774277 |
| H | -2.750596 | -0.499110 | -0.645684 |
| H | 0.751424  | 1.304548  | 1.402634  |
| H | 0.397409  | -2.442990 | -0.337701 |
| H | 0.811060  | -1.312592 | -1.621923 |
| H | 1.159068  | 2.433880  | 0.118179  |
| H | -2.379958 | 1.627171  | -0.644305 |



NBO Steric Energy: 239.83

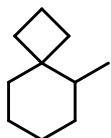

5-methylspiro[3.5]nonane

| Conformation | Electronic Energy | Enthalpy    | Gibbs Free Energy |
|--------------|-------------------|-------------|-------------------|
| ax           | -391.829805       | -391.556992 | -391.601179       |
| ax2          | -391.828400       | -391.555538 | -391.59993        |
| eq           | -391.829132       | -391.556438 | -391.601004       |
| eq2          | -391.830131       | -391.557484 | -391.601397       |

ax

|   |           |           |           |
|---|-----------|-----------|-----------|
| C | -0.457291 | 1.052677  | 0.486369  |
| H | 0.008698  | 1.614489  | 1.302204  |
| C | -1.648423 | 0.275623  | 1.063876  |
| C | -2.260691 | -0.687966 | 0.045464  |
| H | -3.077397 | -1.245469 | 0.507480  |
| H | -2.695327 | -0.125882 | -0.785353 |
| C | -0.001619 | -0.894244 | -1.062509 |
| C | -1.201748 | -1.651243 | -0.490710 |
| H | -1.630269 | -2.303899 | -1.253401 |
| H | -0.865609 | -2.297694 | 0.325441  |
| H | -1.305651 | -0.302583 | 1.928151  |
| H | -0.312651 | -0.336861 | -1.951353 |
| H | 0.767668  | -1.598779 | -1.389588 |
| H | -2.403422 | 0.975468  | 1.429475  |
| C | 0.598886  | 0.078578  | -0.044120 |
| C | 1.921698  | 0.706736  | -0.551778 |
| C | 1.433810  | -0.673458 | 1.032247  |
| C | 2.705747  | -0.390308 | 0.202107  |
| H | 2.085253  | 1.689935  | -0.107612 |
| H | 2.055348  | 0.775920  | -1.631820 |
| H | 1.440065  | -0.128094 | 1.977073  |
| H | 1.182557  | -1.715992 | 1.224909  |
| H | 3.596675  | -0.081380 | 0.744647  |
| H | 2.961713  | -1.226555 | -0.445924 |
| C | -0.890813 | 2.067332  | -0.572745 |
| H | -1.589542 | 2.789256  | -0.145958 |
| H | -0.032034 | 2.621670  | -0.955636 |
| H | -1.383405 | 1.594094  | -1.421952 |

ax2

```
=====
C  0.295582    -0.976967    -1.128475
H -0.291073    -1.807728    -1.527968
C  1.522808    -1.504678    -0.384450
C  2.326874    -0.358801     0.229146
H  3.168903    -0.751808     0.801754
H  2.750821     0.253996    -0.570839
C  0.195639     1.030144     0.406927
C  1.441488     0.499082     1.135331
H  2.011772     1.339180     1.538076
H  1.129422    -0.108175     1.989183
H  1.191396    -2.175926     0.415012
H -0.452467     1.505209     1.150949
H  2.148827    -2.095668    -1.055196
C -0.591357    -0.141756    -0.211667
C -1.971094     0.281512    -0.785063
C -1.358646    -0.947950     0.878169
C -2.635069    -0.147645     0.541053
H -2.264897    -0.368782    -1.610045
H -2.093871     1.318579    -1.092687
H -1.454435    -1.997592     0.596845
H -0.986818    -0.887867     1.900358
H -3.567879    -0.703543     0.474122
H -2.776512     0.694739     1.215976
C  0.578654     2.101566    -0.616956
H  1.101566     2.922166    -0.122328
H  1.239164     1.711377    -1.391192
H -0.298171     2.520116    -1.110672
H  0.614979    -0.375315    -1.985426
```

eq

```
=====
C -0.404810     1.091508    -0.405399
H -0.664911     1.120882    -1.471568
C -1.704281     0.899591     0.386236
C -2.444652    -0.374351    -0.011461
H -3.351369    -0.489080     0.585331
H -2.757740    -0.294980    -1.057394
C -0.235547    -1.402581    -0.620587
C -1.539250    -1.592404     0.151254
H -2.046973    -2.496833    -0.188778
H -1.317809    -1.734455     1.213206
H -1.456634     0.857214     1.453679
H -0.457760    -1.344988    -1.692019
H  0.417214    -2.268008    -0.479383
H -2.346455     1.772365     0.247413
C  0.512967    -0.126268    -0.218155
C  1.913958    -0.103131    -0.884750
C  1.223348    -0.306680     1.154967
C  2.508079    -0.720707     0.401823
H  2.284083     0.906820    -1.050123
H  2.013978    -0.673764    -1.808625
H  1.355651     0.639241     1.678268
```

|   |           |           |           |
|---|-----------|-----------|-----------|
| H | 0.790318  | -1.032514 | 1.842656  |
| H | 3.446286  | -0.303272 | 0.761062  |
| H | 2.610427  | -1.801716 | 0.329561  |
| C | 0.228000  | 2.432605  | -0.041573 |
| H | 1.156408  | 2.618678  | -0.580695 |
| H | -0.460512 | 3.243835  | -0.284203 |
| H | 0.438917  | 2.495085  | 1.027478  |

eq2

```
=====
```

|   |           |           |           |
|---|-----------|-----------|-----------|
| C | 0.643346  | -1.431547 | -0.584166 |
| H | 0.879038  | -1.349399 | -1.651657 |
| C | 1.920009  | -1.246027 | 0.232165  |
| C | 2.489568  | 0.154969  | 0.024003  |
| H | 3.378206  | 0.303341  | 0.640235  |
| H | 2.802172  | 0.262715  | -1.019562 |
| C | 0.146495  | 1.023414  | -0.454770 |
| C | 1.440024  | 1.215967  | 0.345406  |
| H | 1.837903  | 2.214861  | 0.152110  |
| H | 1.200374  | 1.175286  | 1.413986  |
| H | 1.690985  | -1.387274 | 1.293738  |
| H | 0.400382  | 1.086453  | -1.520753 |
| H | 2.656775  | -2.004710 | -0.037476 |
| C | -0.417857 | -0.392280 | -0.233693 |
| C | -1.797628 | -0.632814 | -0.902106 |
| C | -1.098742 | -0.596719 | 1.152355  |
| C | -2.484399 | -0.486158 | 0.475304  |
| H | -1.875256 | -1.647667 | -1.292997 |
| H | -2.093625 | 0.067007  | -1.683450 |
| H | -0.908858 | -1.596379 | 1.544245  |
| H | -0.871766 | 0.130975  | 1.930769  |
| H | -3.215174 | -1.248731 | 0.736820  |
| H | -2.936618 | 0.493829  | 0.613882  |
| C | -0.832653 | 2.153316  | -0.141151 |
| H | -1.747792 | 2.084477  | -0.729339 |
| H | -1.106516 | 2.156591  | 0.915936  |
| H | -0.369765 | 3.116582  | -0.362027 |
| H | 0.230557  | -2.430683 | -0.424535 |

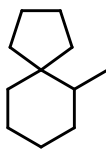

6-methylspiro[4.5]decane

| Conformation | Electronic Energy | Enthalpy    | Gibbs Free Energy |
|--------------|-------------------|-------------|-------------------|
| ax           | -431.162735       | -430.858789 | -430.905236       |
| ax2          | -431.162461       | -430.858567 | -430.904992       |
| ax3          | -431.161759       | -430.857667 | -430.903946       |
| eq           | -431.163849       | -430.860143 | -430.906292       |
| eq2          | -431.162133       | -430.858193 | -430.905006       |
| eq3          | -431.163732       | -430.859972 | -430.906078       |
| eq4          | -431.161465       | -430.857521 | -430.904334       |

ax

|   |           |           |           |
|---|-----------|-----------|-----------|
| C | -0.862788 | 0.977122  | 0.600827  |
| H | -0.514182 | 1.493254  | 1.501400  |
| C | -1.981633 | 0.009521  | 1.015455  |
| C | -2.425970 | -0.889745 | -0.139236 |
| H | -3.201657 | -1.577637 | 0.202032  |
| H | -2.871660 | -0.281971 | -0.931516 |
| C | -0.098892 | -0.730917 | -1.105649 |
| C | -1.239714 | -1.669190 | -0.705645 |
| H | -1.551162 | -2.258225 | -1.570371 |
| H | -0.887778 | -2.380831 | 0.046080  |
| H | -1.626747 | -0.620987 | 1.835707  |
| H | -0.423885 | -0.120532 | -1.953223 |
| H | 0.755761  | -1.313983 | -1.457038 |
| H | -2.830671 | 0.579817  | 1.399317  |
| C | -1.387225 | 2.050699  | -0.357299 |
| H | -2.269066 | 2.535301  | 0.066478  |
| H | -0.638302 | 2.823050  | -0.533392 |
| H | -1.672211 | 1.638985  | -1.325825 |
| C | 0.346550  | 0.203621  | 0.035908  |
| C | 1.470057  | 1.134220  | -0.451840 |
| C | 1.087480  | -0.590980 | 1.131090  |
| C | 2.743665  | 0.269988  | -0.468685 |
| H | 1.582036  | 1.951356  | 0.266948  |
| H | 1.252667  | 1.579492  | -1.423380 |
| C | 2.490831  | -0.860876 | 0.560823  |
| H | 0.576330  | -1.506243 | 1.426061  |
| H | 1.162402  | 0.040545  | 2.020499  |
| H | 2.908614  | -0.148937 | -1.461079 |
| H | 3.626996  | 0.857421  | -0.222528 |
| H | 2.524260  | -1.834506 | 0.072106  |
| H | 3.244085  | -0.876149 | 1.347232  |

ax2

```
=====
C -1.507703 -1.585483 -0.663825
C -0.324517 -0.771864 -1.189178
C -0.690546 0.976836 0.598655
H -0.192419 1.427048 1.464576
C -2.536554 -0.677505 0.008193
C -1.878942 0.149848 1.113686
H -2.610667 0.816939 1.575132
H -1.535180 -0.531180 1.896940
H -2.980175 -0.015792 -0.740602
H -3.351831 -1.271595 0.425020
H -1.967390 -2.143345 -1.481765
H -1.156395 -2.323913 0.062931
C 0.355627 0.071844 -0.094245
C 1.074427 -0.858385 0.937258
C 1.512461 0.896516 -0.709995
C 2.567438 -0.493901 0.892403
H 0.946453 -1.903635 0.650934
H 0.663361 -0.752373 1.941105
C 2.761725 0.036377 -0.527055
H 1.644309 1.822459 -0.142640
H 1.315634 1.171861 -1.747028
H 2.780359 0.307349 1.604179
H 3.213598 -1.335891 1.139246
H 3.688946 0.593549 -0.659584
H 2.762414 -0.792338 -1.239580
H 0.419324 -1.433022 -1.641757
H -0.679685 -0.109643 -1.983931
C -1.174745 2.123033 -0.294166
H -1.918398 2.722490 0.234428
H -0.356538 2.785771 -0.575428
H -1.637754 1.761373 -1.212566
```

ax3

```
=====
C -0.744658 -0.923489 1.190507
H -0.294128 -1.794846 1.672934
C -1.992128 -1.334233 0.409759
C -2.600682 -0.127095 -0.300418
H -3.474698 -0.425412 -0.882186
H -2.948285 0.593405 0.445868
C -0.291824 0.951952 -0.462525
C -1.565204 0.526465 -1.214432
H -1.993045 1.401244 -1.709118
H -1.306036 -0.182132 -2.004858
H -1.726026 -2.092347 -0.333593
H 0.437375 1.261706 -1.217033
H -2.720461 -1.790929 1.082402
C 0.318511 -0.246223 0.318302
C 1.537818 0.170272 1.157645
C 0.991541 -1.223011 -0.669971
C 2.650505 0.417901 0.133684
```

|   |           |           |           |
|---|-----------|-----------|-----------|
| H | 1.808474  | -0.676345 | 1.795499  |
| H | 1.348156  | 1.020767  | 1.811185  |
| C | 2.361919  | -0.592281 | -1.006204 |
| H | 0.396099  | -1.415774 | -1.560914 |
| H | 1.136610  | -2.181002 | -0.164386 |
| H | 2.594630  | 1.440685  | -0.241549 |
| H | 3.642708  | 0.287699  | 0.563244  |
| H | 2.334442  | -0.087108 | -1.971179 |
| H | 3.135903  | -1.355801 | -1.071468 |
| C | -0.567328 | 2.172473  | 0.421321  |
| H | -1.115723 | 2.928934  | -0.143051 |
| H | -1.163194 | 1.919342  | 1.299364  |
| H | 0.357359  | 2.632086  | 0.769715  |
| H | -1.040984 | -0.240560 | 1.993117  |

eq

```
=====
```

|   |           |           |           |
|---|-----------|-----------|-----------|
| C | 1.875905  | 0.967191  | 0.498203  |
| C | 0.599683  | 1.099248  | -0.337125 |
| H | 0.909684  | 1.195375  | -1.385291 |
| C | 0.629245  | -1.374393 | -0.719295 |
| H | 0.048554  | -2.297826 | -0.637178 |
| H | 0.860519  | -1.241912 | -1.782196 |
| C | 2.735079  | -0.204294 | 0.028765  |
| C | 1.937149  | -1.505775 | 0.060300  |
| H | 2.529974  | -2.325545 | -0.350095 |
| H | 1.722767  | -1.765745 | 1.100372  |
| H | 3.069302  | -0.010185 | -0.995444 |
| H | 3.631511  | -0.293408 | 0.645167  |
| H | 2.443512  | 1.899198  | 0.442778  |
| H | 1.603828  | 0.826829  | 1.550551  |
| C | -0.157099 | 2.373986  | 0.030232  |
| H | 0.475058  | 3.245099  | -0.151175 |
| H | -1.065401 | 2.497098  | -0.560410 |
| H | -0.436012 | 2.390227  | 1.085118  |
| C | -0.250002 | -0.193505 | -0.267482 |
| C | -0.839842 | -0.461919 | 1.148455  |
| C | -1.499403 | -0.094820 | -1.189623 |
| C | -2.307405 | -0.844207 | 0.922349  |
| H | -0.795549 | 0.439101  | 1.761901  |
| H | -0.289592 | -1.235421 | 1.683105  |
| C | -2.710154 | 0.033908  | -0.261254 |
| H | -1.594053 | -1.019071 | -1.765018 |
| H | -1.416741 | 0.722933  | -1.906576 |
| H | -2.380967 | -1.896307 | 0.634597  |
| H | -2.925718 | -0.697230 | 1.807749  |
| H | -3.643194 | -0.272910 | -0.733690 |
| H | -2.826425 | 1.067197  | 0.074595  |

eq2

```
=====
```

|   |           |          |           |
|---|-----------|----------|-----------|
| C | -0.911758 | 1.050052 | -0.354252 |
| H | -1.158386 | 1.071849 | -1.423449 |
| C | -2.139542 | 0.501065 | 0.385509  |

|   |           |           |           |
|---|-----------|-----------|-----------|
| C | -2.527880 | -0.900610 | -0.074932 |
| H | -3.387153 | -1.262373 | 0.492831  |
| H | -2.832257 | -0.860965 | -1.125791 |
| C | -0.126077 | -1.312071 | -0.669441 |
| C | -1.347680 | -1.857078 | 0.067131  |
| H | -1.605311 | -2.842643 | -0.325399 |
| H | -1.116474 | -1.992694 | 1.127321  |
| H | -1.923807 | 0.483981  | 1.459498  |
| H | -0.358887 | -1.263092 | -1.738767 |
| H | 0.712307  | -2.003933 | -0.564811 |
| H | -2.976537 | 1.189430  | 0.246170  |
| C | -0.661230 | 2.490187  | 0.094062  |
| H | 0.215891  | 2.935801  | -0.373451 |
| H | -1.521113 | 3.109333  | -0.167355 |
| H | -0.535681 | 2.552280  | 1.176294  |
| C | 0.299979  | 0.099775  | -0.214505 |
| C | 1.517298  | 0.530846  | -1.052872 |
| C | 0.919055  | 0.053940  | 1.195974  |
| C | 2.710074  | -0.248144 | -0.465897 |
| H | 1.689804  | 1.600456  | -0.932132 |
| H | 1.367469  | 0.339030  | -2.116871 |
| C | 2.312472  | -0.570993 | 0.998328  |
| H | 0.314724  | -0.494450 | 1.917855  |
| H | 1.029030  | 1.073201  | 1.570047  |
| H | 2.884639  | -1.167091 | -1.024555 |
| H | 3.628782  | 0.334031  | -0.518977 |
| H | 2.273686  | -1.649147 | 1.152527  |
| H | 3.031014  | -0.174826 | 1.714381  |

eq3

```
=====
```

|   |           |           |           |
|---|-----------|-----------|-----------|
| C | -1.881962 | -1.511115 | 0.315147  |
| C | -0.609378 | -1.465538 | -0.524719 |
| H | -0.892447 | -1.468367 | -1.582769 |
| C | -0.607831 | 1.046505  | -0.488988 |
| H | -0.857272 | 1.051741  | -1.557704 |
| C | -2.731679 | -0.274895 | 0.034794  |
| C | -1.927532 | 0.995738  | 0.293299  |
| H | -2.521661 | 1.877437  | 0.041456  |
| H | -1.705971 | 1.067175  | 1.363561  |
| H | -3.053468 | -0.293929 | -1.011384 |
| H | -3.635443 | -0.279325 | 0.646967  |
| H | -2.444054 | -2.420934 | 0.096686  |
| H | -1.625553 | -1.542626 | 1.378781  |
| C | 0.253240  | -0.220599 | -0.253527 |
| C | 0.856116  | -0.270215 | 1.182395  |
| C | 1.493797  | -0.254984 | -1.192197 |
| C | 2.350897  | 0.025247  | 1.021635  |
| H | 0.736425  | -1.277127 | 1.589765  |
| H | 0.363592  | 0.412215  | 1.874480  |
| C | 2.683010  | -0.648123 | -0.309335 |
| H | 1.675629  | 0.729336  | -1.624956 |
| H | 1.341268  | -0.945435 | -2.022542 |
| H | 2.516605  | 1.102074  | 0.937605  |

|   |           |           |           |
|---|-----------|-----------|-----------|
| H | 2.948048  | -0.341660 | 1.856469  |
| H | 3.642529  | -0.342818 | -0.726235 |
| H | 2.708251  | -1.732135 | -0.171062 |
| H | -0.000699 | -2.358488 | -0.356821 |
| C | 0.112359  | 2.355262  | -0.163485 |
| H | 1.043441  | 2.476815  | -0.715891 |
| H | -0.528764 | 3.203956  | -0.408559 |
| H | 0.343319  | 2.418405  | 0.902041  |

eq4

```

=====
C  0.885978   -1.447456   -0.537338
H  1.148006   -1.392720   -1.600143
C  2.153119   -1.258979    0.292393
C  2.752592    0.121842    0.042105
H  3.636937    0.276926    0.662917
H  3.078864    0.184649   -1.001008
C  0.424061    1.007667   -0.485118
C  1.718872    1.211616    0.311010
H  2.132225    2.193221    0.066366
H  1.484198    1.232474    1.380172
H  1.913120   -1.363863    1.355157
H  0.692993    1.026904   -1.548462
H  2.877765   -2.039309    0.052467
C -0.195022   -0.394002   -0.243968
C -1.419258   -0.635397   -1.158694
C -0.782590   -0.570473    1.174923
C -2.698198   -0.326687   -0.349679
H -1.425387   -1.683529   -1.463573
H -1.351142   -0.041256   -2.071783
C -2.250650   -0.119553    1.114530
H -0.219011   -0.034652    1.939181
H -0.739368   -1.631986    1.433292
H -3.208021    0.558765   -0.727763
H -3.404480   -1.152510   -0.427478
H -2.342096    0.928728    1.391986
H -2.868111   -0.685356    1.811566
H  0.462984   -2.440437   -0.366159
C -0.522819    2.178144   -0.227914
H -1.473837    2.067247   -0.750260
H -0.728321    2.288254    0.838287
H -0.063815    3.108124   -0.568270

```

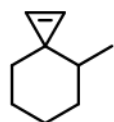

4-methylspiro[2.5]oct-1-ene

| Conformation | Electronic Energy | Enthalpy    | Gibbs Free Energy |
|--------------|-------------------|-------------|-------------------|
| ax           | -351.254596       | -351.037496 | -351.079864       |
| eq           | -351.256967       | -351.040048 | -351.082201       |



ax

```
=====
C -0.891776 -0.169449 -0.037705
C -0.079749 1.057162 0.384117
H -0.655149 1.579746 1.152024
C -1.951226 -0.708202 0.886711
C -2.386029 -0.072772 -0.150239
C 1.255137 0.618249 1.006594
C 2.042145 -0.333262 0.103666
H 2.343987 0.183752 -0.811460
H 2.960183 -0.642956 0.606153
C -0.112727 -1.132209 -0.926228
C 1.200254 -1.554829 -0.262838
H 0.974053 -2.120155 0.647141
H 1.760323 -2.220236 -0.922313
C 0.122769 2.027416 -0.781843
H 0.690232 1.575648 -1.595826
H -0.838932 2.349039 -1.186235
H -2.157897 -1.254269 1.791637
H -3.217191 0.290273 -0.730862
H 1.047386 0.106471 1.951476
H -0.731907 -2.003755 -1.143200
H 0.112357 -0.652021 -1.884333
H 1.855898 1.498849 1.246384
H 0.663869 2.916985 -0.454000
```

eq

```
=====
C -0.585312 -0.583981 -0.181831
C -0.362639 0.910786 -0.435337
H -0.144511 1.026377 -1.504495
C -1.478683 -1.041017 0.941012
C -1.954524 -1.195228 -0.249653
C 0.875744 1.380251 0.339223
C 2.117064 0.557851 -0.003168
H 2.369958 0.715290 -1.056582
H 2.971030 0.901628 0.583388
C 0.643546 -1.409327 -0.541229
C 1.873314 -0.931574 0.233658
H 1.709791 -1.104053 1.302282
H 2.752216 -1.511798 -0.053326
C -1.573236 1.767771 -0.096676
H -1.816857 1.693757 0.965974
H -1.373192 2.815728 -0.324041
H -1.600476 -1.155784 2.004751
H -2.755402 -1.530098 -0.887075
H 0.666097 1.292515 1.411556
H 0.448219 -2.463842 -0.340700
H 0.841732 -1.312138 -1.614816
H 1.056006 2.438666 0.136443
H -2.456245 1.460557 -0.659354
```

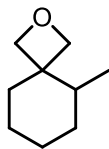

5-methyl-2-oxaspiro[3.5]nonane

| Conformation | Electronic Energy | Enthalpy    | Gibbs Free Energy |
|--------------|-------------------|-------------|-------------------|
| ax           | -427.736566       | -427.487337 | -427.531803       |
| eq           | -427.737042       | -427.487872 | -427.532074       |

ax

|   |           |           |           |
|---|-----------|-----------|-----------|
| C | -0.380042 | 1.056762  | 0.474856  |
| H | 0.137267  | 1.592185  | 1.276712  |
| C | -1.593477 | 0.339249  | 1.082057  |
| C | -2.273981 | -0.599430 | 0.083576  |
| H | -3.102395 | -1.116820 | 0.570198  |
| H | -2.704150 | -0.022087 | -0.738850 |
| C | -0.062696 | -0.914538 | -1.089840 |
| C | -1.275740 | -1.613594 | -0.475012 |
| H | -1.754999 | -2.255162 | -1.215969 |
| H | -0.939038 | -2.264568 | 0.338142  |
| H | -1.258340 | -0.250820 | 1.941618  |
| H | -0.370970 | -0.345686 | -1.971706 |
| H | 0.672488  | -1.649297 | -1.428032 |
| H | -2.304985 | 1.076358  | 1.460366  |
| C | 0.599516  | 0.025359  | -0.085247 |
| C | 1.962018  | 0.560332  | -0.553088 |
| C | 1.444873  | -0.736315 | 0.954983  |
| H | 2.163061  | 1.592782  | -0.254851 |
| H | 2.207827  | 0.425494  | -1.607831 |
| H | 1.400666  | -0.316457 | 1.963531  |
| H | 1.317378  | -1.818835 | 0.999667  |
| O | 2.672795  | -0.370337 | 0.290574  |
| C | -0.784506 | 2.088275  | -0.578999 |
| H | -1.414614 | 2.859561  | -0.133179 |
| H | 0.094097  | 2.579038  | -1.002609 |
| H | -1.341444 | 1.640415  | -1.401513 |

eq

|   |           |          |           |
|---|-----------|----------|-----------|
| C | -0.133031 | 1.034055 | -0.458981 |
| H | -0.380317 | 1.101828 | -1.525421 |
| C | -1.429250 | 1.219329 | 0.338046  |
| C | -2.473733 | 0.155447 | 0.009610  |
| H | -3.366291 | 0.302142 | 0.620167  |

|   |           |           |           |
|---|-----------|-----------|-----------|
| H | -2.779529 | 0.261344  | -1.035977 |
| C | -0.623855 | -1.434770 | -0.586518 |
| C | -1.903847 | -1.244584 | 0.224443  |
| H | -2.638148 | -2.005050 | -0.045304 |
| H | -1.677708 | -1.381303 | 1.287423  |
| H | -1.190314 | 1.172923  | 1.406978  |
| H | -0.855141 | -1.360789 | -1.654497 |
| H | -0.206239 | -2.429509 | -0.416026 |
| H | -1.828870 | 2.218074  | 0.149512  |
| C | 0.420559  | -0.383114 | -0.236252 |
| C | 1.823542  | -0.621396 | -0.816842 |
| C | 1.135848  | -0.579429 | 1.115614  |
| H | 2.214629  | 0.119185  | -1.514917 |
| H | 1.956282  | -1.622897 | -1.234432 |
| H | 1.013570  | 0.192750  | 1.875372  |
| H | 0.961254  | -1.561715 | 1.562997  |
| O | 2.433366  | -0.518100 | 0.486715  |
| C | 0.853376  | 2.152612  | -0.129422 |
| H | 1.785367  | 2.064096  | -0.686822 |
| H | 0.410286  | 3.118814  | -0.375374 |
| H | 1.096589  | 2.166009  | 0.934412  |

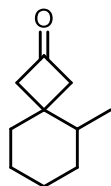

5-methylspiro[3.5]nonan-2-one

| Conformation | Electronic Energy | Enthalpy    | Gibbs Free Energy |
|--------------|-------------------|-------------|-------------------|
| ax           | -465.858517       | -465.604807 | -465.651331       |
| eq           | -465.859121       | -465.605416 | -465.651585       |
| eq2          | -465.858138       | -465.6044   | -465.651052       |

ax

|   |           |           |           |
|---|-----------|-----------|-----------|
| C | -0.810458 | 1.024636  | 0.513141  |
| H | -0.366033 | 1.597630  | 1.332975  |
| C | -1.913259 | 0.130106  | 1.096368  |
| C | -2.467761 | -0.855829 | 0.065713  |
| H | -3.219089 | -1.494379 | 0.533161  |
| H | -2.973292 | -0.312389 | -0.736621 |
| C | -0.235254 | -0.839342 | -1.110503 |
| C | -1.347378 | -1.710756 | -0.526759 |

|   |           |           |           |
|---|-----------|-----------|-----------|
| H | -1.741017 | -2.376943 | -1.296033 |
| H | -0.931680 | -2.347009 | 0.260478  |
| H | -1.499805 | -0.438106 | 1.935673  |
| H | -0.614194 | -0.289168 | -1.976260 |
| H | 0.587321  | -1.463359 | -1.472084 |
| H | -2.715329 | 0.752856  | 1.498187  |
| C | -1.362306 | 2.027979  | -0.500408 |
| C | 0.301314  | 0.154863  | -0.079643 |
| C | 1.549881  | 0.921295  | -0.609225 |
| C | 1.208322  | -0.564487 | 0.972528  |
| H | 1.632251  | 1.922372  | -0.178693 |
| H | 1.718706  | 0.963961  | -1.684597 |
| H | 1.167053  | -0.086898 | 1.954117  |
| H | 1.128461  | -1.644883 | 1.083041  |
| C | 2.397762  | -0.055524 | 0.181502  |
| O | 3.552139  | -0.382266 | 0.124731  |
| H | -1.830407 | 1.537754  | -1.353766 |
| H | -0.570863 | 2.674717  | -0.882765 |
| H | -2.114377 | 2.664319  | -0.030943 |

eq

```
=====
```

|   |           |           |           |
|---|-----------|-----------|-----------|
| C | -0.452920 | 1.029841  | 0.484537  |
| H | -0.778137 | 1.096297  | 1.529758  |
| C | -1.688643 | 1.205983  | -0.404360 |
| C | -2.745075 | 0.132099  | -0.155493 |
| H | -3.128463 | 0.234135  | 0.864586  |
| H | -3.591145 | 0.272394  | -0.830318 |
| C | -0.932252 | -1.441895 | 0.575635  |
| C | -2.149206 | -1.263155 | -0.327991 |
| H | -1.845287 | -1.399215 | -1.371192 |
| H | -2.895044 | -2.029419 | -0.111030 |
| H | -2.109918 | 2.200061  | -0.239418 |
| H | -1.243263 | -1.369830 | 1.623368  |
| H | -0.493243 | -2.432918 | 0.437887  |
| H | -1.373234 | 1.167938  | -1.453216 |
| C | 0.545257  | 2.158393  | 0.228567  |
| C | 0.131962  | -0.383363 | 0.309172  |
| C | 0.910417  | -0.566655 | -1.035766 |
| C | 1.463950  | -0.599865 | 1.089358  |
| H | 0.758259  | 0.143728  | -1.846305 |
| H | 0.819054  | -1.585642 | -1.418601 |
| H | 1.724510  | 0.082295  | 1.896727  |
| H | 1.562175  | -1.632456 | 1.432106  |
| C | 2.188855  | -0.420320 | -0.231403 |
| O | 3.322856  | -0.154150 | -0.523685 |
| H | 1.427041  | 2.090822  | 0.866418  |
| H | 0.877849  | 2.167615  | -0.811334 |
| H | 0.071935  | 3.121010  | 0.426495  |

eq2

```
=====
```

|   |           |          |          |
|---|-----------|----------|----------|
| C | -0.866978 | 1.063412 | 0.375723 |
| H | -1.187739 | 1.087315 | 1.424363 |

|   |           |           |           |
|---|-----------|-----------|-----------|
| C | -2.071977 | 0.642664  | -0.473811 |
| C | -2.619387 | -0.725147 | -0.075116 |
| H | -3.460697 | -0.996989 | -0.714806 |
| H | -2.999072 | -0.675252 | 0.950186  |
| C | -0.318233 | -1.376321 | 0.685906  |
| C | -1.524148 | -1.785414 | -0.154799 |
| H | -1.217291 | -1.906694 | -1.198082 |
| H | -1.899916 | -2.753694 | 0.179577  |
| H | -2.851533 | 1.403388  | -0.394089 |
| H | -0.607546 | -1.337808 | 1.741208  |
| H | 0.476851  | -2.123388 | 0.602643  |
| H | -1.761723 | 0.617009  | -1.525147 |
| C | -0.425253 | 2.471459  | -0.014839 |
| C | 0.233440  | -0.003273 | 0.290497  |
| C | 1.039184  | -0.097141 | -1.047222 |
| C | 1.563345  | 0.269674  | 1.057271  |
| H | 1.034963  | 0.830496  | -1.621988 |
| H | 0.848270  | -0.939891 | -1.710010 |
| H | 1.752196  | 1.326355  | 1.249589  |
| H | 1.752824  | -0.308641 | 1.961006  |
| C | 2.291560  | -0.177545 | -0.195719 |
| O | 3.411508  | -0.554783 | -0.409613 |
| H | 0.442990  | 2.813444  | 0.547890  |
| H | -0.187724 | 2.532493  | -1.078369 |
| H | -1.236240 | 3.175903  | 0.175591  |

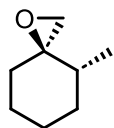

(3*R*,4*R*)-4-methyl-1-oxaspiro[2.5]octane

| Conformation | Electronic Energy | Enthalpy    | Gibbs Free Energy |
|--------------|-------------------|-------------|-------------------|
| ax           | -388.435635       | -388.216919 | -388.258903       |
| eq           | -388.436734       | -388.218062 | -388.260007       |

ax

|   |           |           |           |
|---|-----------|-----------|-----------|
| C | 0.845360  | -0.130831 | 0.078842  |
| C | 0.047473  | 1.086167  | -0.345070 |
| H | 0.642444  | 1.609686  | -1.096772 |
| C | 2.307155  | -0.069605 | 0.095799  |
| C | -1.269525 | 0.628841  | -0.990884 |
| C | -2.048671 | -0.346163 | -0.104795 |
| H | -2.953332 | -0.668168 | -0.622669 |
| H | -2.371849 | 0.155210  | 0.811389  |

|   |           |           |           |
|---|-----------|-----------|-----------|
| C | 0.107882  | -1.125302 | 0.942349  |
| C | -1.190444 | -1.558856 | 0.257332  |
| H | -1.743523 | -2.241126 | 0.903964  |
| H | -0.943043 | -2.109043 | -0.655174 |
| H | 2.862368  | -0.728108 | 0.753990  |
| H | 2.803330  | 0.853459  | -0.183110 |
| H | -1.880099 | 1.502153  | -1.228993 |
| H | 0.757054  | -1.980208 | 1.134369  |
| H | -0.121101 | -0.660731 | 1.904988  |
| H | -1.038696 | 0.130557  | -1.936764 |
| O | 1.618067  | -0.727432 | -0.972207 |
| C | -0.176242 | 2.034162  | 0.833122  |
| H | 0.775801  | 2.339190  | 1.270798  |
| H | -0.698982 | 2.931914  | 0.500652  |
| H | -0.772842 | 1.574187  | 1.620829  |

eq

```
=====
```

|   |           |           |           |
|---|-----------|-----------|-----------|
| C | -0.535359 | -0.550062 | -0.134488 |
| C | -0.344762 | 0.930075  | -0.413642 |
| H | -0.159590 | 1.013070  | -1.491225 |
| C | -1.465961 | -1.024018 | 0.897006  |
| C | 0.915255  | 1.411415  | 0.318217  |
| C | 2.146865  | 0.578542  | -0.031637 |
| H | 3.012747  | 0.937178  | 0.526973  |
| H | 2.376323  | 0.703235  | -1.094258 |
| C | 0.663118  | -1.399912 | -0.481829 |
| C | 1.905052  | -0.901912 | 0.258530  |
| H | 2.773163  | -1.496924 | -0.027226 |
| H | 1.759370  | -1.039311 | 1.334310  |
| H | -2.066760 | -0.320792 | 1.459693  |
| H | -1.270137 | -1.973627 | 1.381873  |
| H | 1.084953  | 2.463973  | 0.082843  |
| H | 0.448928  | -2.442015 | -0.242495 |
| H | 0.832065  | -1.334431 | -1.561310 |
| H | 0.731380  | 1.351110  | 1.396562  |
| O | -1.795334 | -1.115760 | -0.493432 |
| C | -1.551081 | 1.790984  | -0.062027 |
| H | -1.411476 | 2.800888  | -0.448616 |
| H | -2.468623 | 1.387088  | -0.489603 |
| H | -1.678429 | 1.865967  | 1.019150  |

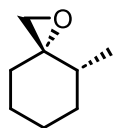

(3S,4R)-4-methyl-1-oxaspiro[2.5]octane

| Conformation | Electronic Energy | Enthalpy    | Gibbs Free Energy |
|--------------|-------------------|-------------|-------------------|
| ax           | -388.435686       | -388.216933 | -388.258913       |
| eq           | -388.436085       | -388.217377 | -388.259288       |

ax

```
=====
C -0.823980 -0.168551 -0.014924
C -0.043182 1.069388 0.377255
H -0.628148 1.600025 1.131782
C -1.872172 -0.672009 0.878509
C 1.289622 0.631004 1.004661
C 2.068782 -0.336768 0.110499
H 2.981505 -0.649887 0.619561
H 2.378271 0.168947 -0.807694
C -0.093092 -1.138918 -0.909704
C 1.221869 -1.558783 -0.247223
H 1.775045 -2.228090 -0.906963
H 0.995996 -2.118861 0.665452
H -2.087830 -0.142707 1.799420
H -2.126117 -1.725659 0.861950
H 1.892198 1.513498 1.228370
H -0.731435 -2.001242 -1.104342
H 0.114934 -0.659055 -1.869927
H 1.080647 0.134268 1.956898
O -2.202576 0.044909 -0.317057
C 0.149737 2.006809 -0.814704
H -0.813094 2.275735 -1.251023
H 0.644554 2.924954 -0.495177
H 0.758583 1.555773 -1.598060
```

eq

```
=====
C -0.532661 -0.571451 -0.226479
C -0.390817 0.924683 -0.457897
H -0.170911 1.051908 -1.523189
C -1.834308 -1.243161 -0.177973
C 0.825893 1.423777 0.334193
C 2.097198 0.651392 -0.015503
H 2.935410 1.020288 0.577762
H 2.346056 0.828911 -1.066535
C 0.703304 -1.368252 -0.573985
C 1.909181 -0.847971 0.209807
H 2.807293 -1.395684 -0.078587
H 1.746085 -1.034359 1.275037
H -1.886732 -2.297256 -0.426184
H -2.748909 -0.680617 -0.315585
H 0.964349 2.489833 0.144660
H 0.522857 -2.422483 -0.360867
H 0.891577 -1.271193 -1.646960
H 0.612500 1.313367 1.402778
O -1.122244 -0.945272 1.026250
C -1.640984 1.723579 -0.113074
H -1.432807 2.791267 -0.190002
H -2.468145 1.497946 -0.785619
H -1.961515 1.514672 0.908756
```

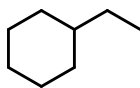

ethylcyclohexane

| Conformation | Electronic Energy | Enthalpy    | Gibbs Free Energy |
|--------------|-------------------|-------------|-------------------|
| ax           | -314.445801       | -314.208652 | -314.250415       |
| ax2          | -314.439479       | -314.202189 | -314.244192       |
| eq           | -314.448190       | -314.211445 | -314.253542       |
| eq2          | -314.446992       | -314.210038 | -314.252134       |

ax

|   |           |           |           |
|---|-----------|-----------|-----------|
| C | -0.646962 | -1.368529 | 0.566911  |
| C | 0.558822  | -0.425782 | 0.696843  |
| H | 1.110887  | -0.705322 | 1.599849  |
| C | 0.061066  | 1.015490  | 0.879555  |
| C | -0.874733 | 1.452270  | -0.248819 |
| H | -1.221790 | 2.471538  | -0.069792 |
| H | -0.331355 | 1.467770  | -1.198269 |
| C | -1.607910 | -0.945141 | -0.547512 |
| C | -2.067488 | 0.501465  | -0.361518 |
| H | -2.717948 | 0.801122  | -1.185289 |
| H | -2.661274 | 0.570989  | 0.555925  |
| H | -0.487078 | 1.072093  | 1.825289  |
| H | -1.117647 | -1.044963 | -1.519414 |
| H | -2.470380 | -1.614106 | -0.563484 |
| H | 0.903348  | 1.703474  | 0.966587  |
| H | -0.300334 | -2.390887 | 0.397696  |
| H | -1.194169 | -1.370451 | 1.514760  |
| C | 1.527613  | -0.590697 | -0.481991 |
| H | 1.828497  | -1.641071 | -0.522076 |
| H | 1.017731  | -0.384317 | -1.425029 |
| C | 2.774053  | 0.284227  | -0.385696 |
| H | 3.495109  | 0.022375  | -1.160805 |
| H | 2.535123  | 1.341391  | -0.505044 |
| H | 3.264524  | 0.160545  | 0.582465  |

ax2

|   |           |           |           |
|---|-----------|-----------|-----------|
| C | -0.156435 | -1.101003 | 0.990228  |
| C | 0.609923  | 0.234903  | 0.978007  |
| H | 0.886766  | 0.438164  | 2.016319  |
| C | -0.305588 | 1.400327  | 0.556509  |
| C | -1.203931 | 1.124252  | -0.651671 |
| H | -1.877205 | 1.971192  | -0.798983 |
| H | -0.610098 | 1.033984  | -1.563312 |
| C | -1.060924 | -1.339590 | -0.223570 |
| C | -2.003599 | -0.160225 | -0.449613 |



|   |           |           |           |
|---|-----------|-----------|-----------|
| H | -2.648279 | -0.348623 | -1.309928 |
| H | -2.656475 | -0.044951 | 0.422196  |
| H | -0.962107 | 1.631269  | 1.401666  |
| H | -0.465530 | -1.488018 | -1.126009 |
| H | -1.632102 | -2.257253 | -0.068893 |
| H | 0.301617  | 2.292251  | 0.383149  |
| H | 0.552678  | -1.925733 | 1.101537  |
| H | -0.793800 | -1.117460 | 1.879872  |
| C | 1.958394  | 0.179538  | 0.238989  |
| H | 2.409703  | 1.173893  | 0.299535  |
| H | 2.613919  | -0.485489 | 0.808543  |
| C | 1.977172  | -0.282195 | -1.216924 |
| H | 2.994884  | -0.228936 | -1.607206 |
| H | 1.647318  | -1.316362 | -1.313653 |
| H | 1.348640  | 0.336039  | -1.856565 |

eq

```
=====
```

|   |           |           |           |
|---|-----------|-----------|-----------|
| C | 0.434073  | -1.355645 | -0.160408 |
| C | -0.559070 | -0.259921 | 0.237771  |
| H | -0.585793 | -0.212583 | 1.334309  |
| C | -0.074230 | 1.098854  | -0.276504 |
| C | 1.349775  | 1.412349  | 0.185155  |
| H | 1.672752  | 2.372363  | -0.221843 |
| H | 1.357101  | 1.511149  | 1.275494  |
| C | 1.856489  | -1.047791 | 0.305832  |
| C | 2.324200  | 0.308001  | -0.220617 |
| H | 3.327436  | 0.533053  | 0.145912  |
| H | 2.384199  | 0.266487  | -1.313026 |
| H | -0.105423 | 1.086447  | -1.372727 |
| H | 1.880387  | -1.034185 | 1.400243  |
| H | 2.537863  | -1.837123 | -0.017040 |
| H | -0.749102 | 1.891070  | 0.051438  |
| H | 0.102041  | -2.315580 | 0.242422  |
| H | 0.427331  | -1.450436 | -1.252565 |
| C | -1.965889 | -0.603271 | -0.255265 |
| H | -2.221438 | -1.605142 | 0.100319  |
| H | -1.950124 | -0.657921 | -1.348590 |
| C | -3.047205 | 0.376283  | 0.191891  |
| H | -2.910431 | 1.361709  | -0.253444 |
| H | -4.037580 | 0.021613  | -0.095503 |
| H | -3.038080 | 0.495922  | 1.277471  |

eq2

```
=====
```

|   |           |           |           |
|---|-----------|-----------|-----------|
| C | -0.076278 | -1.253594 | 0.008033  |
| C | 0.527117  | 0.000302  | -0.631931 |
| H | 0.223346  | 0.000615  | -1.685863 |
| C | -0.076503 | 1.253765  | 0.008584  |
| C | -1.601370 | 1.260672  | -0.108870 |
| H | -2.013421 | 2.150846  | 0.370048  |
| H | -1.879323 | 1.309814  | -1.166508 |
| C | -1.601116 | -1.260871 | -0.109054 |
| C | -2.205856 | -0.000221 | 0.508951  |

|   |           |           |           |
|---|-----------|-----------|-----------|
| H | -3.290372 | -0.000337 | 0.385270  |
| H | -2.007127 | -0.000255 | 1.585610  |
| H | 0.195066  | 1.286338  | 1.068323  |
| H | -1.879272 | -1.310003 | -1.166632 |
| H | -2.012841 | -2.151210 | 0.369867  |
| H | 0.345587  | 2.148294  | -0.456878 |
| H | 0.345948  | -2.147838 | -0.457888 |
| H | 0.195566  | -1.286514 | 1.067668  |
| C | 2.060034  | 0.000423  | -0.613262 |
| H | 2.412305  | 0.876554  | -1.164605 |
| H | 2.412370  | -0.875001 | -1.165674 |
| C | 2.697644  | -0.000387 | 0.774907  |
| H | 2.413197  | -0.882916 | 1.348785  |
| H | 3.785197  | 0.000535  | 0.693809  |
| H | 2.411740  | 0.880541  | 1.350525  |

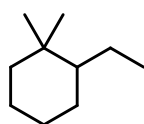

2-ethyl-1,1-dimethylcyclohexane

| Conformation | Electronic Energy | Enthalpy    | Gibbs Free Energy |
|--------------|-------------------|-------------|-------------------|
| ax           | -393.058742       | -392.762757 | -392.809406       |
| ax2          | -393.057008       | -392.761111 | -392.807669       |
| ax3          | -393.053268       | -392.757125 | -392.803615       |
| eq           | -393.060516       | -392.764946 | -392.813089       |
| eq2          | -393.056926       | -392.761135 | -392.80823        |
| eq3          | -393.057216       | -392.761267 | -392.807979       |

ax

|   |           |           |           |
|---|-----------|-----------|-----------|
| C | -0.941063 | -0.656381 | 0.053423  |
| C | 0.510888  | -0.417651 | 0.559488  |
| H | 0.648036  | -1.048680 | 1.445815  |
| C | 0.698268  | 1.044987  | 0.995037  |
| C | 0.374759  | 2.024158  | -0.133012 |
| H | 0.519784  | 3.050568  | 0.208783  |
| H | 1.064977  | 1.868336  | -0.968047 |
| C | -1.302298 | 0.373269  | -1.035237 |
| C | -1.061239 | 1.824573  | -0.617531 |
| H | -1.275865 | 2.487801  | -1.457617 |
| H | -1.750629 | 2.101720  | 0.184548  |
| H | 0.045266  | 1.258829  | 1.843681  |
| H | -0.708731 | 0.164418  | -1.929965 |
| H | -2.349130 | 0.229992  | -1.317598 |
| H | 1.716310  | 1.198376  | 1.353536  |
| C | 1.576144  | -0.858285 | -0.461336 |
| H | 1.501263  | -1.938209 | -0.591704 |
| H | 1.370070  | -0.418619 | -1.439970 |
| C | -1.924322 | -0.544410 | 1.226844  |

|   |           |           |           |
|---|-----------|-----------|-----------|
| H | -2.944378 | -0.723310 | 0.879974  |
| H | -1.693457 | -1.293674 | 1.987645  |
| H | -1.906493 | 0.432803  | 1.706033  |
| C | -1.097718 | -2.062537 | -0.533068 |
| H | -0.763927 | -2.823283 | 0.177310  |
| H | -2.148031 | -2.255823 | -0.761865 |
| H | -0.530624 | -2.186737 | -1.455642 |
| C | 3.009710  | -0.523702 | -0.055821 |
| H | 3.720461  | -1.018567 | -0.718622 |
| H | 3.209193  | 0.546987  | -0.102696 |
| H | 3.217127  | -0.857059 | 0.963680  |

ax2

```
=====
```

|   |           |           |           |
|---|-----------|-----------|-----------|
| C | 0.130671  | 0.967725  | 0.058974  |
| C | -0.527895 | -0.336744 | 0.592889  |
| H | -1.090254 | -0.060574 | 1.491814  |
| C | 0.546058  | -1.356867 | 1.007486  |
| C | 1.491707  | -1.684173 | -0.148143 |
| H | 2.237614  | -2.414136 | 0.171220  |
| H | 0.926474  | -2.144998 | -0.964420 |
| C | 1.136522  | 0.634768  | -1.059653 |
| C | 2.172752  | -0.416828 | -0.662379 |
| H | 2.807586  | -0.647997 | -1.519823 |
| H | 2.830053  | -0.019879 | 0.115754  |
| H | 1.130476  | -0.971430 | 1.845866  |
| H | 0.586602  | 0.270801  | -1.932994 |
| H | 1.633211  | 1.558517  | -1.369188 |
| H | 0.053397  | -2.264864 | 1.361852  |
| C | -1.529970 | -0.982972 | -0.391180 |
| H | -1.288819 | -0.710959 | -1.420438 |
| H | -1.424252 | -2.069178 | -0.340161 |
| C | 0.846804  | 1.693332  | 1.206480  |
| H | 1.286479  | 2.625508  | 0.844778  |
| H | 0.137185  | 1.943438  | 1.998399  |
| H | 1.645836  | 1.102299  | 1.650340  |
| C | -0.918378 | 1.932895  | -0.498559 |
| H | -1.649785 | 2.202935  | 0.266438  |
| H | -0.433756 | 2.851784  | -0.836529 |
| H | -1.453920 | 1.509011  | -1.348815 |
| C | -2.988327 | -0.635604 | -0.098841 |
| H | -3.658514 | -1.115716 | -0.813657 |
| H | -3.268363 | -0.976116 | 0.899952  |
| H | -3.166913 | 0.438355  | -0.142830 |

ax3

```
=====
```

|   |           |           |           |
|---|-----------|-----------|-----------|
| C | 0.727153  | 0.769431  | -0.003545 |
| C | -0.439592 | 0.277748  | 0.906671  |
| H | -0.277431 | 0.778658  | 1.867538  |
| C | -0.344748 | -1.235460 | 1.196247  |
| C | -0.070138 | -2.120354 | -0.023288 |
| H | 0.072027  | -3.151321 | 0.307325  |
| H | -0.926624 | -2.123185 | -0.699107 |

|   |           |           |           |
|---|-----------|-----------|-----------|
| C | 0.974280  | -0.174030 | -1.196527 |
| C | 1.155551  | -1.633909 | -0.790189 |
| H | 1.314904  | -2.248426 | -1.678171 |
| H | 2.047352  | -1.743640 | -0.167410 |
| H | 0.462402  | -1.405098 | 1.913758  |
| H | 0.134529  | -0.108933 | -1.892306 |
| H | 1.855813  | 0.182117  | -1.737196 |
| H | -1.264665 | -1.556702 | 1.691592  |
| C | -1.861471 | 0.720258  | 0.508375  |
| H | -2.515997 | 0.440796  | 1.338803  |
| H | -1.885160 | 1.810673  | 0.470272  |
| C | 2.003338  | 0.841599  | 0.850347  |
| H | 2.865693  | 1.093967  | 0.229059  |
| H | 1.902329  | 1.613952  | 1.615591  |
| H | 2.220171  | -0.098794 | 1.356352  |
| C | 0.459106  | 2.175878  | -0.543185 |
| H | 0.245819  | 2.876279  | 0.267639  |
| H | 1.338581  | 2.541695  | -1.078187 |
| H | -0.383251 | 2.191518  | -1.236350 |
| C | -2.478345 | 0.175665  | -0.778797 |
| H | -3.467451 | 0.613699  | -0.924298 |
| H | -1.882695 | 0.417063  | -1.658426 |
| H | -2.607151 | -0.905275 | -0.743134 |

eq

```
=====
```

|   |           |           |           |
|---|-----------|-----------|-----------|
| C | -0.458382 | 0.927852  | -0.034134 |
| C | 0.630739  | -0.158345 | -0.254182 |
| H | 0.721848  | -0.276214 | -1.342437 |
| C | 0.207154  | -1.520137 | 0.315464  |
| C | -1.142993 | -1.991814 | -0.218116 |
| H | -1.063048 | -2.161948 | -1.296716 |
| H | -1.414353 | -2.946815 | 0.235726  |
| C | -1.808134 | 0.396643  | -0.554551 |
| C | -2.222488 | -0.945754 | 0.041015  |
| H | -2.382267 | -0.845576 | 1.118146  |
| H | -3.173825 | -1.263420 | -0.389935 |
| H | 0.971317  | -2.262858 | 0.082310  |
| H | -1.734296 | 0.284929  | -1.642138 |
| H | -2.576821 | 1.151182  | -0.366923 |
| H | 0.161973  | -1.453510 | 1.407325  |
| C | 2.010975  | 0.243163  | 0.283770  |
| H | 2.222110  | 1.281347  | 0.023847  |
| H | 1.997341  | 0.194473  | 1.376141  |
| C | -0.129815 | 2.189276  | -0.839794 |
| H | -0.961092 | 2.895844  | -0.782227 |
| H | 0.758057  | 2.699768  | -0.467142 |
| H | 0.031931  | 1.947757  | -1.892853 |
| C | -0.580511 | 1.318116  | 1.443845  |
| H | 0.328411  | 1.808672  | 1.795100  |
| H | -1.406733 | 2.020563  | 1.575910  |
| H | -0.767940 | 0.460400  | 2.089821  |
| C | 3.150636  | -0.625520 | -0.245253 |
| H | 4.114762  | -0.258609 | 0.108853  |

|   |          |           |           |
|---|----------|-----------|-----------|
| H | 3.058565 | -1.662886 | 0.075782  |
| H | 3.170974 | -0.613978 | -1.336982 |

eq2

```
=====
C  0.035954    0.831093    0.014034
C  0.378521   -0.648196   -0.327719
H  0.415917   -0.707724   -1.423323
C -0.718707   -1.618650    0.146423
C -2.119197   -1.253563   -0.330097
H -2.161681   -1.318166   -1.422167
H -2.846928   -1.966844    0.061448
C -1.412139    1.133248   -0.430847
C -2.464270    0.166915    0.099362
H -2.508644    0.217671    1.191026
H -3.449942    0.454546   -0.271234
H -0.458637   -2.624029   -0.192065
H -1.442258    1.106157   -1.526096
H -1.651846    2.158475   -0.136798
H -0.713781   -1.651998    1.240972
C  1.711743   -1.189565    0.216356
H  1.666738   -1.205584    1.308953
H  1.760304   -2.237441   -0.090615
C  0.920709    1.816708   -0.762336
H  0.516266    2.826935   -0.660671
H  1.945509    1.840919   -0.402265
H  0.936783    1.571607   -1.826641
C  0.195516    1.109627    1.512246
H  1.240152    1.022650    1.816340
H -0.131448    2.126769    1.740231
H -0.390010    0.426098    2.128029
C  3.008839   -0.513027   -0.224591
H  3.856398   -1.170424   -0.024939
H  3.002564   -0.295685   -1.294399
H  3.192733    0.418531    0.307221
```

eq3

```
=====
C -0.237932    0.952542   -0.009904
C  0.478326   -0.257845   -0.671659
H  0.179463   -0.210502   -1.725937
C -0.034060   -1.601442   -0.136608
C -1.546266   -1.746163   -0.279667
H -1.812878   -1.741958   -1.341486
H -1.875048   -2.703474    0.129117
C -1.761309    0.743863   -0.132444
C -2.257351   -0.590223    0.417888
H -2.070361   -0.644931    1.494122
H -3.337721   -0.666948    0.281489
H  0.476460   -2.410693   -0.665806
H -2.028928    0.800525   -1.193446
H -2.268574    1.574668    0.365286
H  0.231144   -1.706804    0.918799
C  2.021287   -0.205648   -0.656565
```

|   |           |           |           |
|---|-----------|-----------|-----------|
| H | 2.378530  | -0.741649 | -1.539602 |
| H | 2.355439  | 0.825347  | -0.780721 |
| C | 0.098835  | 2.246667  | -0.758386 |
| H | -0.510040 | 3.068780  | -0.374786 |
| H | 1.143984  | 2.532780  | -0.640273 |
| H | -0.109000 | 2.145532  | -1.826089 |
| C | 0.148690  | 1.140310  | 1.461676  |
| H | 1.190233  | 1.450918  | 1.553101  |
| H | -0.468242 | 1.923763  | 1.908530  |
| H | 0.014382  | 0.233537  | 2.051563  |
| C | 2.719383  | -0.815598 | 0.561781  |
| H | 3.796010  | -0.653540 | 0.491705  |
| H | 2.381007  | -0.382070 | 1.501559  |
| H | 2.556522  | -1.892060 | 0.616200  |

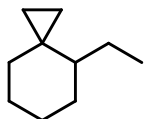

4-ethylspiro[2.5]octane

| Conformation | Electronic Energy | Enthalpy    | Gibbs Free Energy |
|--------------|-------------------|-------------|-------------------|
| ax           | -391.829859       | -391.557356 | -391.602652       |
| ax2          | -391.830378       | -391.557812 | -391.603561       |
| ax3          | -391.824208       | -391.551416 | -391.596931       |
| ax5          | -391.824035       | -391.551211 | -391.597004       |
| eq1          | -391.829076       | -391.556406 | -391.602667       |
| eq2          | -391.827452       | -391.55481  | -391.600043       |
| eq3          | -391.825088       | -391.552264 | -391.597405       |
| eq4          | -391.824816       | -391.552032 | -391.598133       |

ax

|   |           |           |           |
|---|-----------|-----------|-----------|
| C | 0.152943  | 0.828426  | 0.008318  |
| C | 0.405981  | -0.493124 | 0.720667  |
| H | 0.993478  | -0.278058 | 1.619605  |
| C | -0.009678 | 2.051135  | 0.868903  |
| C | 1.215697  | 1.883999  | 0.004297  |
| C | -0.948203 | -1.080458 | 1.151655  |
| C | -1.926360 | -1.214778 | -0.020436 |
| H | -1.557015 | -1.959783 | -0.729714 |
| H | -2.886748 | -1.582874 | 0.344975  |
| C | -0.778604 | 0.714225  | -1.181763 |
| C | -2.119580 | 0.118940  | -0.745281 |
| H | -2.612536 | 0.824538  | -0.069214 |

|   |           |           |           |
|---|-----------|-----------|-----------|
| H | -2.776421 | -0.010974 | -1.607170 |
| C | 1.203809  | -1.503708 | -0.115930 |
| H | 1.312257  | -2.413608 | 0.480554  |
| H | 0.634229  | -1.788780 | -1.002453 |
| H | 0.113930  | 1.937863  | 1.937555  |
| H | -0.743355 | 2.786210  | 0.567127  |
| H | 1.303506  | 2.510041  | -0.873538 |
| H | 2.148759  | 1.663519  | 0.503404  |
| H | -1.392320 | -0.421218 | 1.903317  |
| H | -0.925250 | 1.699527  | -1.628995 |
| H | -0.326368 | 0.078357  | -1.949579 |
| H | -0.795996 | -2.052071 | 1.627246  |
| C | 2.584710  | -1.020455 | -0.548173 |
| H | 3.170706  | -0.684688 | 0.309869  |
| H | 3.138129  | -1.823682 | -1.036337 |
| H | 2.516731  | -0.189529 | -1.250195 |

ax2

```
=====
```

|   |           |           |           |
|---|-----------|-----------|-----------|
| C | 0.894804  | -0.570870 | -0.058654 |
| C | -0.533859 | -0.456919 | 0.455973  |
| H | -0.667704 | -1.210692 | 1.239275  |
| C | 1.937672  | -1.068890 | 0.900565  |
| C | 1.475605  | -1.937751 | -0.246765 |
| C | -0.722645 | 0.930493  | 1.088117  |
| C | -0.356799 | 2.058820  | 0.121171  |
| H | -1.037629 | 2.050773  | -0.735082 |
| H | -0.484902 | 3.024003  | 0.614180  |
| C | 1.307219  | 0.535469  | -1.010474 |
| C | 1.083118  | 1.908692  | -0.373758 |
| H | 1.763798  | 2.021609  | 0.476003  |
| H | 1.325907  | 2.698826  | -1.086344 |
| C | -1.553412 | -0.768847 | -0.647990 |
| H | -1.430406 | -0.076127 | -1.482866 |
| H | -1.326917 | -1.763656 | -1.039903 |
| H | 1.619287  | -1.346287 | 1.896305  |
| H | 2.929181  | -0.641442 | 0.837533  |
| H | 2.162090  | -2.090664 | -1.068377 |
| H | 0.850154  | -2.787377 | -0.007384 |
| H | -0.071022 | 0.998325  | 1.964668  |
| H | 2.356200  | 0.406647  | -1.285103 |
| H | 0.725771  | 0.465548  | -1.934689 |
| H | -1.745296 | 1.051233  | 1.448009  |
| C | -3.003563 | -0.733323 | -0.174339 |
| H | -3.322059 | 0.278733  | 0.076692  |
| H | -3.675233 | -1.105003 | -0.948858 |
| H | -3.140060 | -1.355690 | 0.712866  |

ax3

```
=====
```

|   |           |           |           |
|---|-----------|-----------|-----------|
| C | 0.961556  | -0.282434 | -0.084762 |
| C | -0.245318 | -0.616941 | 0.789000  |
| H | 0.158889  | -1.136966 | 1.662355  |
| C | 2.300967  | -0.252675 | 0.602985  |

|   |           |           |           |
|---|-----------|-----------|-----------|
| C | 1.954577  | -1.371286 | -0.350525 |
| C | -0.898310 | 0.678477  | 1.305969  |
| C | -1.091425 | 1.767018  | 0.243042  |
| H | -1.851422 | 1.467865  | -0.479874 |
| H | -1.457929 | 2.674737  | 0.726520  |
| C | 0.753302  | 0.782452  | -1.144324 |
| C | 0.207516  | 2.059005  | -0.506427 |
| H | 0.951363  | 2.454227  | 0.192761  |
| H | 0.041656  | 2.824125  | -1.266719 |
| C | -1.235638 | -1.622998 | 0.171456  |
| H | -0.654326 | -2.449855 | -0.244569 |
| H | -1.816479 | -2.046703 | 0.995383  |
| H | 2.337185  | -0.488892 | 1.657534  |
| H | 3.020701  | 0.483699  | 0.272155  |
| H | 2.450223  | -1.384314 | -1.311670 |
| H | 1.759304  | -2.345822 | 0.076398  |
| H | -0.254095 | 1.090925  | 2.088506  |
| H | 1.702961  | 0.978479  | -1.646806 |
| H | 0.056136  | 0.431568  | -1.909124 |
| H | -1.854206 | 0.441678  | 1.780335  |
| C | -2.226309 | -1.131114 | -0.882427 |
| H | -1.734590 | -0.684377 | -1.745349 |
| H | -2.823210 | -1.970481 | -1.242963 |
| H | -2.917674 | -0.396921 | -0.468789 |

ax5

```
=====
```

|   |           |           |           |
|---|-----------|-----------|-----------|
| C | 0.933848  | -0.130291 | -0.030652 |
| C | -0.216292 | -0.539893 | 0.886471  |
| H | 0.241574  | -0.908994 | 1.808876  |
| C | 2.273793  | 0.095603  | 0.618553  |
| C | 2.039793  | -1.117294 | -0.250228 |
| C | -1.042052 | 0.697836  | 1.288101  |
| C | -1.390453 | 1.646781  | 0.138464  |
| H | -2.092083 | 1.174097  | -0.551600 |
| H | -1.893179 | 2.528121  | 0.541527  |
| C | 0.587772  | 0.823568  | -1.161230 |
| C | -0.135070 | 2.058764  | -0.627476 |
| H | 0.533512  | 2.608051  | 0.043203  |
| H | -0.391261 | 2.730424  | -1.448540 |
| C | -1.048281 | -1.731230 | 0.374396  |
| H | -0.421906 | -2.623721 | 0.450106  |
| H | -1.871875 | -1.881070 | 1.077863  |
| H | 2.355967  | -0.062393 | 1.684962  |
| H | 2.899022  | 0.883405  | 0.221069  |
| H | 2.515040  | -1.138970 | -1.221506 |
| H | 1.965255  | -2.076049 | 0.244693  |
| H | -0.454542 | 1.267182  | 2.015511  |
| H | 1.506461  | 1.108451  | -1.678615 |
| H | -0.052121 | 0.332032  | -1.896767 |
| H | -1.949617 | 0.375269  | 1.803372  |
| C | -1.607830 | -1.681105 | -1.045770 |
| H | -0.808348 | -1.662906 | -1.786449 |
| H | -2.206187 | -2.573553 | -1.236295 |



H -2.247090 -0.815809 -1.215184

eq1

```
=====
C -0.513354 0.831126 -0.178788
C 0.636309 -0.169001 -0.310760
H 0.707013 -0.424706 -1.376702
C -0.574185 1.766940 0.996270
C -0.318442 2.302752 -0.393562
C 0.269281 -1.452911 0.448037
C -1.068802 -2.038611 -0.001482
H -0.987751 -2.350214 -1.047853
H -1.299027 -2.933614 0.579311
C -1.842752 0.258980 -0.638251
C -2.193528 -1.014655 0.127194
H -2.340083 -0.769121 1.183659
H -3.133737 -1.430234 -0.239574
C 2.005310 0.362561 0.123188
H 2.000400 0.547809 1.200405
H 0.253065 1.784519 1.691028
H -1.543659 1.952330 1.438596
H -1.123505 2.836568 -0.879912
H 0.668699 2.684726 -0.605518
H 0.223691 -1.218799 1.517976
H -2.625029 1.010612 -0.513905
H -1.782191 0.030294 -1.708032
H 1.053888 -2.199063 0.318354
H 2.194849 1.321382 -0.360956
C 3.158980 -0.579113 -0.217352
H 4.117365 -0.108686 0.004404
H 3.111879 -1.507528 0.350741
H 3.151230 -0.834683 -1.278988
```

eq2

```
=====
C -0.088027 0.797000 -0.124250
C 0.456839 -0.630963 -0.123603
H 0.484283 -0.954082 -1.172453
C 0.047068 1.653049 1.103951
C 0.809402 1.998008 -0.152578
C -0.561731 -1.531131 0.588023
C -1.939961 -1.455245 -0.070737
H -1.866023 -1.864440 -1.083477
H -2.652609 -2.079123 0.471756
C -1.426821 0.892226 -0.831837
C -2.452293 -0.017197 -0.153175
H -2.640926 0.356863 0.857694
H -3.402446 0.015563 -0.689252
C 1.876361 -0.794529 0.437388
H 1.954910 -1.776269 0.909615
H 0.614566 1.278571 1.944226
H -0.798146 2.273790 1.368575
H 0.480757 2.855788 -0.723495
H 1.879111 1.849357 -0.130486
```

|   |           |           |           |
|---|-----------|-----------|-----------|
| H | -0.632546 | -1.224704 | 1.637550  |
| H | -1.774158 | 1.927456  | -0.830399 |
| H | -1.307054 | 0.590695  | -1.877839 |
| H | -0.203096 | -2.562766 | 0.579915  |
| H | 2.061051  | -0.066797 | 1.230442  |
| C | 2.960777  | -0.683935 | -0.632675 |
| H | 3.958660  | -0.733158 | -0.195033 |
| H | 2.870142  | -1.500787 | -1.350870 |
| H | 2.883839  | 0.250344  | -1.189500 |

eq3

```
=====
```

|   |           |           |           |
|---|-----------|-----------|-----------|
| C | -0.126524 | 0.839467  | -0.237148 |
| C | 0.367224  | -0.552851 | -0.622993 |
| H | 0.002705  | -0.712345 | -1.645903 |
| C | 0.374555  | 1.549881  | 0.990115  |
| C | 0.731929  | 2.057813  | -0.387979 |
| C | -0.357843 | -1.582632 | 0.253076  |
| C | -1.874937 | -1.477917 | 0.077046  |
| H | -2.128397 | -1.751335 | -0.952109 |
| H | -2.381640 | -2.191803 | 0.729026  |
| C | -1.620002 | 0.974059  | -0.475791 |
| C | -2.381200 | -0.061361 | 0.355165  |
| H | -2.240744 | 0.167884  | 1.415910  |
| H | -3.451916 | 0.002591  | 0.153227  |
| C | 1.880892  | -0.794956 | -0.708391 |
| H | 2.307046  | -0.124303 | -1.457636 |
| H | 1.151497  | 1.102926  | 1.588574  |
| H | -0.357314 | 2.115384  | 1.551494  |
| H | 0.263488  | 2.972146  | -0.726288 |
| H | 1.754938  | 1.923174  | -0.711056 |
| H | -0.100767 | -1.413608 | 1.303139  |
| H | -1.947119 | 1.983774  | -0.219011 |
| H | -1.836084 | 0.821353  | -1.538332 |
| H | -0.020431 | -2.590041 | -0.003316 |
| H | 1.999128  | -1.804188 | -1.111085 |
| C | 2.705255  | -0.696201 | 0.576223  |
| H | 3.677431  | -1.168083 | 0.428279  |
| H | 2.892610  | 0.336304  | 0.867052  |
| H | 2.219480  | -1.201635 | 1.412091  |

eq4

```
=====
```

|   |           |           |           |
|---|-----------|-----------|-----------|
| C | -0.021464 | 0.776260  | -0.114236 |
| C | 0.361052  | -0.695452 | -0.286896 |
| H | 0.357779  | -0.899498 | -1.365827 |
| C | 0.461312  | 1.554912  | 1.077710  |
| C | 0.945716  | 1.908146  | -0.309271 |
| C | -0.725847 | -1.576314 | 0.356517  |
| C | -2.136234 | -1.272111 | -0.138313 |
| H | -2.200798 | -1.494405 | -1.208270 |
| H | -2.856436 | -1.918894 | 0.365996  |
| C | -1.435657 | 1.081686  | -0.584868 |
| C | -2.478435 | 0.196235  | 0.088793  |

|   |           |           |           |
|---|-----------|-----------|-----------|
| H | -2.491171 | 0.403551  | 1.163464  |
| H | -3.473614 | 0.425899  | -0.295911 |
| C | 1.716636  | -1.159790 | 0.267174  |
| H | 1.729229  | -2.244180 | 0.136241  |
| H | 1.174564  | 1.086970  | 1.741677  |
| H | -0.234008 | 2.228980  | 1.559367  |
| H | 0.542961  | 2.805513  | -0.759408 |
| H | 1.973493  | 1.707399  | -0.556936 |
| H | -0.688371 | -1.426017 | 1.441597  |
| H | -1.651958 | 2.136467  | -0.403898 |
| H | -1.485265 | 0.926447  | -1.668612 |
| H | -0.483740 | -2.625405 | 0.174529  |
| H | 1.740325  | -0.995588 | 1.347426  |
| C | 2.990596  | -0.599602 | -0.368889 |
| H | 3.822550  | -1.284702 | -0.201311 |
| H | 2.876024  | -0.477209 | -1.447663 |
| H | 3.282396  | 0.360853  | 0.051215  |

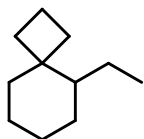

5-ethylspiro[3.5]nonane

| Conformation | Electronic Energy | Enthalpy    | Gibbs Free Energy |
|--------------|-------------------|-------------|-------------------|
| ax1          | -431.135117       | -430.832318 | -430.879986       |
| ax2          | -431.132947       | -430.829981 | -430.877051       |
| ax3          | -431.127837       | -430.8247   | -430.87208        |
| ax4          | -431.133337       | -430.830374 | -430.878403       |
| ax5          | -431.127446       | -430.824208 | -430.871151       |
| ax6          | -431.129193       | -430.826098 | -430.873679       |
| eq1          | -431.133618       | -430.830822 | -430.878953       |
| eq2          | -431.129627       | -430.826552 | -430.873814       |
| eq3          | -431.129563       | -430.826607 | -430.874188       |
| eq4          | -431.134399       | -430.831652 | -430.87911        |
| eq5          | -431.131295       | -430.828302 | -430.874929       |

eq6 | -431.131365 | -430.828427 | -430.875165

ax1

```
=====  
C 0.612299 -0.512578 0.490641  
H 0.491154 -1.238058 1.303584  
C 1.232017 0.762082 1.080258  
C 1.307123 1.889755 0.050015  
H 1.733441 2.784649 0.506831  
H 1.976566 1.604453 -0.766545  
C -0.750697 0.939314 -1.070368  
C -0.082460 2.196502 -0.509604  
H -0.022972 2.963795 -1.283590  
H -0.701643 2.606333 0.293946  
H 0.608569 1.095024 1.916548  
H -0.208514 0.604695 -1.959640  
H -1.769127 1.168909 -1.395067  
H 2.219276 0.551715 1.494074  
C -0.788243 -0.199037 -0.045912  
C -1.623616 -1.404282 -0.549005  
C -1.888968 0.043808 1.026766  
C -2.850638 -0.837483 0.198865  
H -1.278614 -2.336062 -0.097946  
H -1.702896 -1.538021 -1.628308  
H -1.625371 -0.428184 1.974340  
H -2.188646 1.074513 1.213899  
H -3.471531 -1.545431 0.743700  
H -3.486809 -0.241980 -0.453413  
C 1.493447 -1.182851 -0.572145  
H 1.619705 -0.525490 -1.434112  
H 0.968278 -2.068695 -0.938608  
C 2.868078 -1.597174 -0.054069  
H 2.778716 -2.196244 0.854887  
H 3.401559 -2.192989 -0.795447  
H 3.488813 -0.731261 0.178223
```

ax2

```
=====  
C -0.507622 0.603361 0.729859  
H -0.068765 1.037402 1.635709  
C -1.581982 -0.411190 1.155633  
C -2.164932 -1.167948 -0.040998  
H -2.893811 -1.903012 0.305344  
H -2.705443 -0.475182 -0.690359  
C 0.064851 -0.897675 -1.216791  
C -1.061600 -1.863733 -0.839354  
H -1.475875 -2.323202 -1.738629  
H -0.648978 -2.676081 -0.234680  
H -1.135298 -1.134666 1.844820  
H -0.302877 -0.168331 -1.945265  
H 0.874550 -1.444920 -1.706506  
H -2.376359 0.100404 1.703591  
C 0.613486 -0.152141 0.003456
```

|   |           |           |           |
|---|-----------|-----------|-----------|
| C | 1.934149  | 0.599601  | -0.321083 |
| C | 1.458497  | -1.099110 | 0.906652  |
| C | 2.730675  | -0.626169 | 0.171596  |
| H | 2.075800  | 1.452451  | 0.342713  |
| H | 2.082426  | 0.920898  | -1.352339 |
| H | 1.447110  | -0.756983 | 1.942778  |
| H | 1.227251  | -2.163270 | 0.882087  |
| H | 3.614832  | -0.435598 | 0.776264  |
| H | 3.000095  | -1.294165 | -0.644500 |
| C | -1.142436 | 1.758633  | -0.059345 |
| H | -1.983200 | 2.130486  | 0.533359  |
| H | -1.573254 | 1.390784  | -0.991781 |
| C | -0.213179 | 2.928974  | -0.373182 |
| H | 0.543460  | 2.662484  | -1.109688 |
| H | -0.782057 | 3.767937  | -0.776519 |
| H | 0.300953  | 3.276953  | 0.524950  |

ax3

```
=====
```

|   |           |           |           |
|---|-----------|-----------|-----------|
| C | -0.435593 | 0.558499  | 0.850098  |
| H | 0.001245  | 0.960360  | 1.769887  |
| C | -1.285513 | -0.656570 | 1.260521  |
| C | -1.646812 | -1.598665 | 0.106251  |
| H | -2.149052 | -2.481120 | 0.508073  |
| H | -2.351324 | -1.120634 | -0.574159 |
| C | 0.370306  | -0.791467 | -1.164150 |
| C | -0.406081 | -2.015208 | -0.680293 |
| H | -0.688866 | -2.641186 | -1.528554 |
| H | 0.239335  | -2.624095 | -0.040621 |
| H | -0.716303 | -1.234421 | 1.996059  |
| H | -0.237419 | -0.229672 | -1.877967 |
| H | 1.270448  | -1.105119 | -1.699765 |
| H | -2.191565 | -0.315510 | 1.768553  |
| C | 0.767034  | 0.119475  | 0.000104  |
| C | 1.741939  | 1.238652  | -0.447617 |
| C | 1.954475  | -0.508476 | 0.793013  |
| C | 2.930286  | 0.332436  | -0.058903 |
| H | 1.677209  | 2.103838  | 0.213592  |
| H | 1.670673  | 1.574556  | -1.482891 |
| H | 1.949093  | -0.183602 | 1.834131  |
| H | 2.065504  | -1.591592 | 0.758629  |
| H | 3.764740  | 0.802692  | 0.456921  |
| H | 3.314193  | -0.227639 | -0.909471 |
| C | -1.247539 | 1.738420  | 0.274616  |
| H | -0.542868 | 2.473783  | -0.121725 |
| H | -1.738756 | 2.226389  | 1.120823  |
| C | -2.325637 | 1.474018  | -0.776646 |
| H | -3.129560 | 0.855327  | -0.378000 |
| H | -2.770037 | 2.422113  | -1.084480 |
| H | -1.937883 | 0.988853  | -1.670990 |

ax4

```
=====
```

|   |          |          |           |
|---|----------|----------|-----------|
| C | 0.575950 | 1.178375 | -1.127689 |
|---|----------|----------|-----------|

|   |           |           |           |
|---|-----------|-----------|-----------|
| H | 1.525909  | 1.554228  | -1.515506 |
| C | -0.170945 | 2.292661  | -0.392994 |
| C | -1.466434 | 1.773510  | 0.231441  |
| H | -1.954454 | 2.566637  | 0.800787  |
| H | -2.161961 | 1.482195  | -0.560796 |
| C | -0.453878 | -0.554607 | 0.401408  |
| C | -1.179904 | 0.579831  | 1.143656  |
| H | -2.102701 | 0.208656  | 1.590958  |
| H | -0.552851 | 0.921093  | 1.971341  |
| H | 0.471330  | 2.685804  | 0.402249  |
| H | -0.181391 | -1.320236 | 1.137906  |
| H | -0.377035 | 3.121666  | -1.072291 |
| C | 0.852828  | -0.009827 | -0.211387 |
| C | 1.778951  | -1.116964 | -0.786894 |
| C | 1.934861  | 0.240383  | 0.881883  |
| C | 2.569093  | -1.124287 | 0.538821  |
| H | 2.379901  | -0.729427 | -1.610611 |
| H | 1.319066  | -2.053335 | -1.097471 |
| H | 2.587776  | 1.069990  | 0.606885  |
| H | 1.590044  | 0.386106  | 1.904748  |
| H | 3.654195  | -1.166468 | 0.472248  |
| H | 2.228018  | -1.910529 | 1.210193  |
| C | -1.354898 | -1.237426 | -0.639161 |
| H | -1.643517 | -0.527303 | -1.415968 |
| H | -0.781913 | -2.018860 | -1.140445 |
| H | -0.009391 | 0.851234  | -1.992566 |
| C | -2.614417 | -1.861683 | -0.042545 |
| H | -3.313934 | -1.105256 | 0.313737  |
| H | -3.137082 | -2.465371 | -0.785280 |
| H | -2.367248 | -2.510625 | 0.800660  |

ax5

```
=====
```

|   |           |           |           |
|---|-----------|-----------|-----------|
| C | 0.129564  | -0.847407 | -1.302753 |
| H | -0.557895 | -1.368455 | -1.974106 |
| C | 1.160946  | -1.824115 | -0.741527 |
| C | 2.094465  | -1.112010 | 0.234053  |
| H | 2.811477  | -1.817999 | 0.657826  |
| H | 2.674487  | -0.357468 | -0.301970 |
| C | 0.179602  | 0.492629  | 0.884562  |
| C | 1.286748  | -0.466863 | 1.359898  |
| H | 1.946106  | 0.062018  | 2.051483  |
| H | 0.818215  | -1.273218 | 1.932841  |
| H | 0.644299  | -2.633591 | -0.214675 |
| H | -0.470871 | 0.642080  | 1.752715  |
| H | 1.727063  | -2.283402 | -1.553718 |
| C | -0.690951 | -0.185309 | -0.196679 |
| C | -1.878483 | 0.699756  | -0.664616 |
| C | -1.739749 | -1.126671 | 0.470559  |
| C | -2.779738 | 0.011760  | 0.383597  |
| H | -2.176207 | 0.435917  | -1.680488 |
| H | -1.763098 | 1.780434  | -0.600150 |

|   |           |           |           |
|---|-----------|-----------|-----------|
| H | -1.998311 | -1.956697 | -0.188304 |
| H | -1.502103 | -1.517576 | 1.459664  |
| H | -3.788738 | -0.256331 | 0.077390  |
| H | -2.834074 | 0.583347  | 1.308711  |
| C | 0.686651  | 1.911641  | 0.544730  |
| H | -0.142518 | 2.607058  | 0.692469  |
| H | 1.431592  | 2.179329  | 1.298887  |
| H | 0.642078  | -0.092932 | -1.901880 |
| C | 1.267014  | 2.187211  | -0.842039 |
| H | 0.518862  | 2.045532  | -1.622387 |
| H | 1.602062  | 3.224464  | -0.896523 |
| H | 2.121163  | 1.553763  | -1.076499 |

ax6

```
=====
```

|   |           |           |           |
|---|-----------|-----------|-----------|
| C | -0.448780 | -0.738504 | 1.356113  |
| H | 0.016861  | -1.476324 | 2.013999  |
| C | -1.787525 | -1.270882 | 0.838702  |
| C | -2.437636 | -0.299790 | -0.148012 |
| H | -3.336999 | -0.747811 | -0.574793 |
| H | -2.761978 | 0.595311  | 0.387495  |
| C | -0.128202 | 0.619665  | -0.740171 |
| C | -1.470942 | 0.081685  | -1.274466 |
| H | -1.930081 | 0.831407  | -1.922675 |
| H | -1.293620 | -0.799928 | -1.893708 |
| H | -1.611339 | -2.226391 | 0.334139  |
| H | 0.551697  | 0.753120  | -1.590122 |
| H | -2.463503 | -1.474286 | 1.671105  |
| C | 0.494563  | -0.437375 | 0.195799  |
| C | 1.995546  | -0.211851 | 0.554904  |
| C | 0.950886  | -1.706095 | -0.592835 |
| C | 2.402027  | -1.189681 | -0.564779 |
| H | 2.215232  | -0.616220 | 1.544210  |
| H | 2.397617  | 0.792992  | 0.488240  |
| H | 0.829921  | -2.604560 | 0.014183  |
| H | 0.506636  | -1.881180 | -1.571078 |
| H | 3.184623  | -1.911467 | -0.339980 |
| H | 2.662791  | -0.664683 | -1.482560 |
| C | -0.372687 | 2.010452  | -0.124328 |
| H | -0.834342 | 2.616860  | -0.908535 |
| H | -1.118058 | 1.937140  | 0.668646  |
| H | -0.610265 | 0.163674  | 1.954959  |
| C | 0.832973  | 2.771808  | 0.419936  |
| H | 1.652729  | 2.796387  | -0.300509 |
| H | 0.551516  | 3.803400  | 0.637197  |
| H | 1.209224  | 2.335965  | 1.344610  |

eq1

```
=====
```

|   |          |          |           |
|---|----------|----------|-----------|
| C | 0.848589 | 0.042912 | -0.254388 |
| H | 1.083044 | 0.220507 | -1.313315 |
| C | 1.078854 | 1.355524 | 0.508434  |
| C | 0.216075 | 2.500678 | -0.013457 |
| H | 0.402822 | 3.408270 | 0.563558  |

|   |           |           |           |
|---|-----------|-----------|-----------|
| H | 0.491303  | 2.717677  | -1.050517 |
| C | -1.504456 | 0.815613  | -0.705562 |
| C | -1.260014 | 2.120211  | 0.047187  |
| H | -1.881833 | 2.914731  | -0.369338 |
| H | -1.556314 | 2.000997  | 1.093794  |
| H | 0.840022  | 1.180883  | 1.564339  |
| H | -1.280346 | 0.968878  | -1.767252 |
| H | -2.558782 | 0.532890  | -0.643858 |
| H | 2.134194  | 1.630146  | 0.467102  |
| C | -0.637939 | -0.343872 | -0.199399 |
| C | -1.085425 | -1.658469 | -0.894119 |
| C | -1.186172 | -0.916851 | 1.139370  |
| C | -1.970910 | -1.977031 | 0.333238  |
| H | -0.279130 | -2.379414 | -1.011798 |
| H | -1.590522 | -1.536465 | -1.852803 |
| H | -0.401393 | -1.372267 | 1.742323  |
| H | -1.763575 | -0.237246 | 1.765781  |
| H | -1.942218 | -2.998119 | 0.707674  |
| H | -3.009208 | -1.690621 | 0.177316  |
| C | 1.807712  | -1.038837 | 0.261626  |
| H | 1.452724  | -2.030879 | -0.020254 |
| H | 1.816930  | -1.015287 | 1.354580  |
| C | 3.233476  | -0.870494 | -0.259268 |
| H | 3.654584  | 0.096984  | 0.015885  |
| H | 3.891728  | -1.641554 | 0.142762  |
| H | 3.257228  | -0.946420 | -1.347949 |

eq2

```
=====
```

|   |           |           |           |
|---|-----------|-----------|-----------|
| C | -0.038179 | 0.897293  | 0.593537  |
| H | 0.382596  | 0.975567  | 1.604950  |
| C | 0.964906  | 1.582896  | -0.341438 |
| C | 2.373146  | 1.029887  | -0.115901 |
| H | 3.083987  | 1.500683  | -0.797609 |
| H | 2.689038  | 1.284518  | 0.900632  |
| C | 1.331531  | -1.179139 | 0.552505  |
| C | 2.407422  | -0.488794 | -0.288668 |
| H | 3.393081  | -0.877427 | -0.026054 |
| H | 2.248132  | -0.728240 | -1.343488 |
| H | 0.669399  | 1.420378  | -1.383379 |
| H | 1.558648  | -1.051949 | 1.616251  |
| H | 1.334068  | -2.254188 | 0.351838  |
| H | 0.953917  | 2.662295  | -0.171906 |
| C | -0.065352 | -0.606715 | 0.277778  |
| C | -1.171397 | -1.475784 | 0.929131  |
| C | -0.558291 | -1.096481 | -1.120251 |
| C | -1.354585 | -2.218870 | -0.413365 |
| H | -2.055766 | -0.895241 | 1.187154  |
| H | -0.872222 | -2.068884 | 1.794162  |
| H | -1.197100 | -0.385620 | -1.634304 |
| H | 0.220460  | -1.420686 | -1.809534 |
| H | -2.378694 | -2.376066 | -0.745834 |
| H | -0.830106 | -3.172230 | -0.437066 |
| C | -1.381279 | 1.639203  | 0.675223  |



|   |           |          |           |
|---|-----------|----------|-----------|
| H | -1.143852 | 2.671898 | 0.945117  |
| H | -1.959164 | 1.241746 | 1.512037  |
| C | -2.270255 | 1.659234 | -0.567405 |
| H | -2.745029 | 0.694036 | -0.742743 |
| H | -3.066837 | 2.394077 | -0.442559 |
| H | -1.710558 | 1.928949 | -1.464542 |

eq3

```
=====
```

|   |           |           |           |
|---|-----------|-----------|-----------|
| C | 0.011547  | 0.986697  | -0.333613 |
| H | -0.057067 | 1.185698  | -1.411827 |
| C | -1.259459 | 1.540286  | 0.336671  |
| C | -2.548749 | 0.864726  | -0.113080 |
| H | -3.401667 | 1.296449  | 0.413880  |
| H | -2.706270 | 1.043952  | -1.181402 |
| C | -1.239628 | -1.199135 | -0.582843 |
| C | -2.457229 | -0.635442 | 0.137480  |
| H | -3.361571 | -1.144660 | -0.200437 |
| H | -2.370737 | -0.817438 | 1.213367  |
| H | -1.156043 | 1.406081  | 1.419996  |
| H | -1.371289 | -1.053527 | -1.661191 |
| H | -1.161048 | -2.277726 | -0.420394 |
| H | -1.311481 | 2.617076  | 0.160996  |
| C | 0.088922  | -0.543652 | -0.177679 |
| C | 1.227996  | -1.322851 | -0.898665 |
| C | 0.606242  | -1.104005 | 1.178490  |
| C | 1.484830  | -2.115409 | 0.405960  |
| H | 2.070898  | -0.713916 | -1.203726 |
| H | 0.897569  | -1.908941 | -1.756824 |
| H | 1.208021  | -0.381659 | 1.728012  |
| H | -0.146992 | -1.515819 | 1.850262  |
| H | 2.521443  | -2.193925 | 0.727662  |
| H | 1.053569  | -3.114293 | 0.379741  |
| C | 1.185546  | 1.808696  | 0.229448  |
| H | 1.154796  | 1.752527  | 1.320939  |
| H | 0.969956  | 2.852268  | -0.014227 |
| C | 2.605917  | 1.499022  | -0.234823 |
| H | 2.674291  | 1.450253  | -1.322997 |
| H | 3.281521  | 2.286218  | 0.103458  |
| H | 2.976486  | 0.557785  | 0.170634  |

eq4

```
=====
```

|   |           |           |           |
|---|-----------|-----------|-----------|
| C | -1.814441 | 0.317681  | -0.691923 |
| H | -1.780564 | 0.024381  | -1.747717 |
| C | -2.388566 | -0.829010 | 0.134689  |
| C | -1.476075 | -2.048512 | 0.053485  |
| H | -1.859277 | -2.858005 | 0.677571  |
| H | -1.464603 | -2.418026 | -0.976966 |
| C | 0.527382  | -0.522977 | -0.335940 |
| C | -0.050961 | -1.692534 | 0.471915  |
| H | 0.588677  | -2.569193 | 0.366353  |
| H | -0.041394 | -1.421742 | 1.534132  |
| H | -2.474483 | -0.511303 | 1.179215  |

|   |           |           |           |
|---|-----------|-----------|-----------|
| H | 0.537024  | -0.819533 | -1.394200 |
| H | -3.395323 | -1.077138 | -0.206003 |
| C | -0.406923 | 0.701015  | -0.242412 |
| C | 0.143897  | 1.983667  | -0.922158 |
| C | -0.347320 | 1.448914  | 1.123756  |
| C | 0.502432  | 2.561040  | 0.466464  |
| H | -0.655718 | 2.545686  | -1.405261 |
| H | 0.958379  | 1.855117  | -1.634590 |
| H | -1.332881 | 1.804885  | 1.425535  |
| H | 0.101941  | 0.918096  | 1.962198  |
| H | 0.193146  | 3.586201  | 0.659717  |
| H | 1.561355  | 2.465562  | 0.698050  |
| C | 1.979500  | -0.234323 | 0.066671  |
| H | 2.343388  | 0.630290  | -0.490154 |
| H | 2.017052  | 0.036819  | 1.125514  |
| H | -2.460354 | 1.196629  | -0.625675 |
| C | 2.933009  | -1.400803 | -0.187475 |
| H | 3.966658  | -1.095417 | -0.021358 |
| H | 2.733825  | -2.246514 | 0.469823  |
| H | 2.851553  | -1.751742 | -1.218619 |

eq5

```
=====
```

|   |           |           |           |
|---|-----------|-----------|-----------|
| C | 1.456447  | -1.282437 | -0.371642 |
| H | 1.736133  | -1.251186 | -1.431023 |
| C | 2.449441  | -0.453382 | 0.439490  |
| C | 2.386958  | 1.015399  | 0.027109  |
| H | 3.062070  | 1.614174  | 0.641358  |
| H | 2.725679  | 1.111792  | -1.009310 |
| C | -0.031189 | 0.702907  | -0.673814 |
| C | 0.958666  | 1.543225  | 0.141512  |
| H | 0.909105  | 2.584854  | -0.187051 |
| H | 0.660879  | 1.532114  | 1.194492  |
| H | 2.202652  | -0.538682 | 1.503106  |
| H | 0.338413  | 0.687937  | -1.707423 |
| H | 3.460677  | -0.845026 | 0.316022  |
| C | 0.023887  | -0.772163 | -0.224852 |
| C | -1.049426 | -1.677909 | -0.884148 |
| C | -0.633382 | -1.083085 | 1.152253  |
| C | -1.883149 | -1.616480 | 0.415642  |
| H | -0.654961 | -2.678539 | -1.063731 |
| H | -1.515124 | -1.314411 | -1.799878 |
| H | -0.097150 | -1.886251 | 1.659913  |
| H | -0.765053 | -0.260457 | 1.852249  |
| H | -2.303000 | -2.553487 | 0.775951  |
| H | -2.678656 | -0.875538 | 0.358565  |
| C | -1.414911 | 1.378615  | -0.748451 |
| H | -1.304097 | 2.235618  | -1.418347 |
| H | -2.125341 | 0.710569  | -1.238881 |
| H | 1.494135  | -2.329729 | -0.062164 |
| C | -2.025019 | 1.898754  | 0.554449  |
| H | -2.964106 | 2.411087  | 0.339720  |
| H | -2.243859 | 1.105986  | 1.267207  |
| H | -1.368333 | 2.618505  | 1.043935  |

eq6

|   |           |           |           |
|---|-----------|-----------|-----------|
| C | 1.381966  | -1.077805 | -0.791179 |
| H | 1.427923  | -0.764048 | -1.840752 |
| C | 2.561167  | -0.479068 | -0.032426 |
| C | 2.467356  | 1.042473  | -0.035577 |
| H | 3.280653  | 1.481240  | 0.545502  |
| H | 2.575596  | 1.405524  | -1.062679 |
| C | -0.081258 | 0.887450  | -0.221124 |
| C | 1.120991  | 1.499479  | 0.517432  |
| H | 1.049262  | 2.587939  | 0.469680  |
| H | 1.054850  | 1.228444  | 1.577454  |
| H | 2.545555  | -0.840462 | 1.001235  |
| H | -0.017593 | 1.197362  | -1.272991 |
| H | 3.503982  | -0.810108 | -0.471368 |
| C | 0.033911  | -0.652596 | -0.211088 |
| C | -1.166746 | -1.419088 | -0.828330 |
| C | -0.319224 | -1.304060 | 1.159212  |
| C | -1.697063 | -1.715920 | 0.592180  |
| H | -0.822113 | -2.329454 | -1.320345 |
| H | -1.811178 | -0.877127 | -1.516969 |
| H | 0.316346  | -2.167078 | 1.360292  |
| H | -0.318018 | -0.657851 | 2.036366  |
| H | -2.024610 | -2.734853 | 0.788568  |
| H | -2.486441 | -1.030551 | 0.895600  |
| C | -1.370671 | 1.496115  | 0.360838  |
| H | -1.588465 | 1.045000  | 1.332486  |
| H | -1.149747 | 2.545804  | 0.569335  |
| H | 1.438460  | -2.168959 | -0.782877 |
| C | -2.620114 | 1.467063  | -0.520930 |
| H | -3.373681 | 2.147949  | -0.122146 |
| H | -2.385169 | 1.794566  | -1.535801 |
| H | -3.077497 | 0.482390  | -0.584636 |

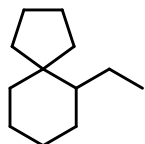

6-ethylspiro[4.5]decane

| Conformation | Electronic Energy | Enthalpy    | Gibbs Free Energy |
|--------------|-------------------|-------------|-------------------|
| ax1          | -470.467698       | -470.133517 | -470.182925       |
| ax2          | -470.465166       | -470.131181 | -470.180936       |
| ax3          | -470.460854       | -470.126647 | -470.176567       |
| ax4          | -470.466388       | -470.132237 | -470.181514       |
| ax5          | -470.459401       | -470.125075 | -470.174252       |
| ax6          | -470.464860       | -470.130731 | -470.179836       |

|     |  |             |  |             |  |             |
|-----|--|-------------|--|-------------|--|-------------|
| ax7 |  | -470.461483 |  | -470.127056 |  | -470.176104 |
| ax8 |  | -470.467279 |  | -470.133298 |  | -470.182968 |
| ax9 |  | -470.460450 |  | -470.126315 |  | -470.1759   |
| eq1 |  | -470.468417 |  | -470.134634 |  | -470.184266 |
| eq2 |  | -470.464738 |  | -470.13061  |  | -470.179503 |
| eq3 |  | -470.464783 |  | -470.130843 |  | -470.179875 |
| eq4 |  | -470.466583 |  | -470.132646 |  | -470.182786 |
| eq5 |  | -470.461892 |  | -470.127723 |  | -470.177649 |
| eq6 |  | -470.462004 |  | -470.127749 |  | -470.177425 |
| eq7 |  | -470.464227 |  | -470.130148 |  | -470.17901  |
| eq8 |  | -470.464360 |  | -470.130163 |  | -470.178828 |
| eq9 |  | -470.467898 |  | -470.134127 |  | -470.184066 |

ax1

```
=====
```

|   |           |           |           |
|---|-----------|-----------|-----------|
| C | 0.844020  | -0.498795 | 0.560503  |
| H | 0.700545  | -1.130668 | 1.445040  |
| C | 1.570652  | 0.778541  | 1.007851  |
| C | 1.704781  | 1.784278  | -0.135452 |
| H | 2.221769  | 2.680780  | 0.211547  |
| H | 2.317595  | 1.356300  | -0.934600 |
| C | -0.462900 | 0.904966  | -1.096165 |
| C | 0.327743  | 2.150925  | -0.688879 |
| H | 0.427302  | 2.818128  | -1.547200 |
| H | -0.224115 | 2.705609  | 0.074847  |
| H | 1.003809  | 1.242262  | 1.819862  |
| H | 0.018020  | 0.450098  | -1.966610 |
| H | -1.467170 | 1.193146  | -1.416410 |
| H | 2.550569  | 0.532266  | 1.418424  |
| C | 1.666732  | -1.327080 | -0.440870 |
| H | 1.143146  | -2.268617 | -0.615111 |
| H | 1.714564  | -0.821481 | -1.407472 |
| C | -0.561537 | -0.149988 | 0.024310  |
| C | -1.331758 | -1.383425 | -0.478953 |
| C | -1.503526 | 0.338587  | 1.145188  |
| C | -2.815704 | -0.977345 | -0.466254 |
| H | -1.164221 | -2.207810 | 0.220632  |
| H | -0.998062 | -1.715213 | -1.462649 |
| C | -2.929516 | 0.140696  | 0.600599  |
| H | -1.317482 | 1.367122  | 1.450652  |
| H | -1.348535 | -0.294297 | 2.023210  |
| H | -3.116836 | -0.601818 | -1.443974 |
| H | -3.459644 | -1.826320 | -0.241323 |
| H | -3.298522 | 1.061511  | 0.149203  |
| H | -3.625315 | -0.121649 | 1.396309  |
| C | 3.085521  | -1.637107 | 0.030184  |
| H | 3.559709  | -2.367428 | -0.626369 |
| H | 3.714796  | -0.746780 | 0.038250  |
| H | 3.081026  | -2.050662 | 1.041371  |

ax2

```
=====
```

|   |           |          |          |
|---|-----------|----------|----------|
| C | -0.963880 | 0.375664 | 0.620216 |
|---|-----------|----------|----------|

|   |           |           |           |
|---|-----------|-----------|-----------|
| H | -0.799285 | 0.970015  | 1.525748  |
| C | -1.688452 | -0.915880 | 1.030223  |
| C | -1.844467 | -1.872262 | -0.151984 |
| H | -2.368862 | -2.776897 | 0.160937  |
| H | -2.459493 | -1.401100 | -0.924955 |
| C | 0.306593  | -0.967905 | -1.113550 |
| C | -0.479258 | -2.226349 | -0.738482 |
| H | -0.596173 | -2.860849 | -1.619118 |
| H | 0.083274  | -2.810714 | -0.005428 |
| H | -1.125160 | -1.418594 | 1.821484  |
| H | -0.191165 | -0.480085 | -1.956645 |
| H | 1.302298  | -1.246679 | -1.465604 |
| H | -2.666215 | -0.664496 | 1.447094  |
| C | -1.845079 | 1.221050  | -0.327571 |
| H | -1.577169 | 1.032929  | -1.368907 |
| H | -2.883672 | 0.896378  | -0.224592 |
| C | 0.430745  | 0.041695  | 0.045700  |
| C | 1.208604  | 1.285434  | -0.416363 |
| C | 1.390916  | -0.500743 | 1.125832  |
| C | 2.678182  | 0.840071  | -0.489853 |
| H | 1.103270  | 2.062725  | 0.344787  |
| H | 0.837738  | 1.691771  | -1.358922 |
| C | 2.807817  | -0.298003 | 0.554604  |
| H | 1.199322  | -1.538038 | 1.395766  |
| H | 1.263774  | 0.099124  | 2.030939  |
| H | 2.917808  | 0.471645  | -1.487024 |
| H | 3.357440  | 1.666225  | -0.284872 |
| H | 3.166247  | -1.211845 | 0.081208  |
| H | 3.518873  | -0.049992 | 1.341361  |
| C | -1.790775 | 2.723359  | -0.056002 |
| H | -2.465821 | 3.264055  | -0.721275 |
| H | -2.092769 | 2.939090  | 0.970714  |
| H | -0.789949 | 3.128536  | -0.199313 |

ax3

```
=====
```

|   |           |           |           |
|---|-----------|-----------|-----------|
| C | -0.780785 | 0.403599  | 0.961122  |
| H | -0.419442 | 0.642308  | 1.967228  |
| C | -1.673484 | -0.841892 | 1.119047  |
| C | -1.969845 | -1.593779 | -0.180821 |
| H | -2.528068 | -2.504013 | 0.048025  |
| H | -2.604737 | -0.994958 | -0.835001 |
| C | 0.161312  | -0.684476 | -1.158287 |
| C | -0.679023 | -1.938418 | -0.917552 |
| H | -0.903899 | -2.418954 | -1.871635 |
| H | -0.109075 | -2.662944 | -0.329931 |
| H | -1.169762 | -1.538328 | 1.796755  |
| H | -0.379658 | -0.027636 | -1.842268 |
| H | 1.091551  | -0.956083 | -1.662887 |
| H | -2.606952 | -0.554377 | 1.609408  |
| C | -1.554819 | 1.674493  | 0.553082  |
| H | -2.364277 | 1.791452  | 1.279416  |
| H | -0.894592 | 2.530725  | 0.707637  |
| C | 0.490232  | 0.085581  | 0.137681  |

|   |           |           |           |
|---|-----------|-----------|-----------|
| C | 1.321191  | 1.339360  | -0.184067 |
| C | 1.515439  | -0.718731 | 0.969963  |
| C | 2.734349  | 0.823844  | -0.506064 |
| H | 1.355285  | 1.972305  | 0.707067  |
| H | 0.892398  | 1.933135  | -0.992785 |
| C | 2.866634  | -0.517479 | 0.260251  |
| H | 1.255282  | -1.770549 | 1.081248  |
| H | 1.558456  | -0.286941 | 1.972777  |
| H | 2.848653  | 0.663014  | -1.577763 |
| H | 3.497667  | 1.542058  | -0.210279 |
| H | 3.064834  | -1.335011 | -0.432567 |
| H | 3.689465  | -0.501408 | 0.973536  |
| C | -2.153180 | 1.793073  | -0.848473 |
| H | -2.680396 | 2.744847  | -0.936448 |
| H | -1.388260 | 1.775437  | -1.623597 |
| H | -2.872597 | 1.004873  | -1.063240 |

ax4

```
=====
```

|   |           |           |           |
|---|-----------|-----------|-----------|
| C | -0.134211 | -1.427779 | 1.142586  |
| H | 0.603363  | -2.118627 | 1.559497  |
| C | -1.192608 | -2.196847 | 0.353039  |
| C | -2.190287 | -1.235484 | -0.290340 |
| H | -2.925783 | -1.786292 | -0.879490 |
| H | -2.742380 | -0.706379 | 0.493108  |
| C | -0.406880 | 0.580190  | -0.393643 |
| C | -1.451924 | -0.233758 | -1.175488 |
| H | -2.155832 | 0.439890  | -1.664601 |
| H | -0.954157 | -0.783745 | -1.977253 |
| H | -0.708199 | -2.785857 | -0.432130 |
| H | 0.147622  | 1.175540  | -1.127269 |
| H | -1.705526 | -2.903035 | 1.008631  |
| C | 0.604484  | -0.373103 | 0.308917  |
| C | 1.629242  | 0.387289  | 1.168708  |
| C | 1.552233  | -0.995307 | -0.740065 |
| C | 2.554229  | 1.072006  | 0.157386  |
| H | 2.196648  | -0.353549 | 1.739800  |
| H | 1.181359  | 1.072911  | 1.886238  |
| C | 2.601927  | 0.096465  | -1.046347 |
| H | 1.042510  | -1.340719 | -1.637731 |
| H | 2.039857  | -1.864100 | -0.290745 |
| H | 2.132950  | 2.031263  | -0.146944 |
| H | 3.541788  | 1.271842  | 0.570555  |
| H | 2.365785  | 0.616785  | -1.974085 |
| H | 3.592205  | -0.339339 | -1.171793 |
| C | -1.053500 | 1.580509  | 0.580878  |
| H | -1.438636 | 1.058809  | 1.460127  |
| H | -0.277678 | 2.256263  | 0.943598  |
| H | -0.618533 | -0.938875 | 1.993677  |
| C | -2.170505 | 2.422711  | -0.031036 |
| H | -3.061774 | 1.830367  | -0.238884 |
| H | -2.460784 | 3.225609  | 0.647517  |
| H | -1.848012 | 2.879882  | -0.969398 |

ax5

```
=====
C  1.539466   -0.728064   1.294924
C  0.582701    0.428722    0.961649
C  0.159010   -0.719763   -1.283778
H -0.641413   -1.142768   -1.898644
H  0.650656    0.033644   -1.899683
C  2.218191   -1.324212    0.063109
C  1.169921   -1.814559   -0.933987
H  1.648911   -2.173078   -1.847235
H  0.650876   -2.672370   -0.498599
H  2.862686   -0.578935   -0.407126
H  2.864765   -2.152246    0.360600
H  2.286070   -0.383265    2.013468
H  0.971187   -1.521992    1.790419
C -0.488820   -0.042561   -0.056569
C -1.461014   -1.056265    0.622862
C -1.428805    1.115621   -0.516547
C -2.853809   -0.705462    0.097879
H -1.445837   -0.914175    1.706520
H -1.187704   -2.092750    0.429650
C -2.814151    0.819712    0.071335
H -1.491707    1.116257   -1.607611
H -1.061526    2.095903   -0.218936
H -2.983832   -1.088861   -0.917709
H -3.655164   -1.113111    0.714001
H -3.622518    1.271549   -0.503171
H -2.878592    1.200270    1.093991
C  1.329460    1.747541    0.639476
H  2.204569    1.786092    1.294133
H  0.694900    2.577492    0.956745
H  0.038730    0.648330    1.885965
C  1.780711    2.053924   -0.790219
H  0.933737    2.139216   -1.470686
H  2.304634    3.011454   -0.802230
H  2.459402    1.305542   -1.194658
```

ax6

```
=====
C -0.938749   -0.974728    1.261368
H -0.615541   -1.858114    1.818191
C -2.239163   -1.265186    0.512607
C -2.668630   -0.051503   -0.309332
H -3.582893   -0.269041   -0.864377
H -2.897652    0.777237    0.368190
C -0.242947    0.677480   -0.531654
C -1.555600    0.362859   -1.270548
H -1.856945    1.241583   -1.845060
H -1.397398   -0.441989   -1.992157
H -2.094143   -2.119727   -0.155453
H  0.527678    0.839735   -1.292223
H -3.022681   -1.544593    1.219394
C  0.200362   -0.537766    0.332938
C  1.487948   -0.245772    1.122848
```

|   |           |           |           |
|---|-----------|-----------|-----------|
| C | 0.690873  | -1.691059 | -0.568621 |
| C | 2.625624  | -0.321051 | 0.093084  |
| H | 1.612986  | -1.040176 | 1.864122  |
| H | 1.457521  | 0.698473  | 1.666259  |
| C | 2.120423  | -1.303775 | -0.993991 |
| H | 0.043657  | -1.886878 | -1.421659 |
| H | 0.718365  | -2.604033 | 0.032255  |
| H | 2.813187  | 0.659997  | -0.343176 |
| H | 3.558828  | -0.651971 | 0.546641  |
| H | 2.114707  | -0.821412 | -1.971219 |
| H | 2.758500  | -2.182302 | -1.079009 |
| C | -0.375239 | 1.992733  | 0.271733  |
| H | -1.283381 | 2.512519  | -0.042355 |
| H | -0.506425 | 1.781835  | 1.334726  |
| H | -1.126626 | -0.190429 | 2.001408  |
| C | 0.804690  | 2.944818  | 0.087690  |
| H | 0.926441  | 3.205370  | -0.965631 |
| H | 0.654021  | 3.871007  | 0.644615  |
| H | 1.740235  | 2.500605  | 0.427780  |

ax7

```
=====
```

|   |           |           |           |
|---|-----------|-----------|-----------|
| C | 0.535732  | -0.906978 | -1.334920 |
| H | -0.033109 | -1.487069 | -2.066680 |
| C | 1.583713  | -1.788218 | -0.659922 |
| C | 2.372620  | -0.975236 | 0.361285  |
| H | 3.097939  | -1.609404 | 0.875300  |
| H | 2.943741  | -0.207291 | -0.163000 |
| C | 0.260795  | 0.474650  | 0.814659  |
| C | 1.434289  | -0.345712 | 1.392951  |
| H | 2.000757  | 0.287517  | 2.080225  |
| H | 1.022383  | -1.158970 | 1.996897  |
| H | 1.091957  | -2.627048 | -0.157784 |
| H | -0.470159 | 0.542031  | 1.627205  |
| H | 2.254077  | -2.214654 | -1.408402 |
| C | -0.454780 | -0.288995 | -0.339764 |
| C | -1.498556 | 0.585820  | -1.053956 |
| C | -1.376352 | -1.366330 | 0.280490  |
| C | -2.645251 | 0.724783  | -0.047647 |
| H | -1.848889 | 0.038381  | -1.934099 |
| H | -1.106469 | 1.541711  | -1.399712 |
| C | -2.663338 | -0.625580 | 0.710707  |
| H | -0.908781 | -1.896911 | 1.109224  |
| H | -1.611441 | -2.107529 | -0.487255 |
| H | -2.439092 | 1.543980  | 0.642641  |
| H | -3.596263 | 0.943621  | -0.531159 |
| H | -2.686082 | -0.464523 | 1.787954  |
| H | -3.547135 | -1.211009 | 0.460480  |
| C | 0.627878  | 1.945720  | 0.538990  |
| H | -0.297068 | 2.506101  | 0.384924  |
| H | 1.058488  | 2.339154  | 1.464005  |
| H | 1.048547  | -0.117768 | -1.889988 |
| C | 1.581066  | 2.272863  | -0.609421 |
| H | 1.175083  | 1.975387  | -1.575629 |



|   |          |          |           |
|---|----------|----------|-----------|
| H | 1.753192 | 3.350028 | -0.646832 |
| H | 2.551429 | 1.793539 | -0.489024 |

ax8

```

=====
C  0.583723    2.213105   -0.600570
C -0.288933    1.079190   -1.141221
C  0.736263   -0.537983    0.512126
H  0.465561   -1.192537    1.349961
C  1.879652    1.672453    0.002688
C  1.565888    0.627273    1.072823
H  2.484259    0.253169    1.526684
H  1.002378    1.112572    1.874314
H  2.493467    1.227507   -0.786098
H  2.463676    2.486951    0.434972
H  0.799858    2.925006   -1.399400
H  0.038989    2.763532    0.172073
C -0.588242   -0.011326   -0.092242
C -1.536362    0.553430    1.016677
C -1.424660   -1.139565   -0.741197
C -2.855166   -0.235089    0.919014
H -1.725346    1.614331    0.846460
H -1.095443    0.467025    2.009655
C -2.880546   -0.730242   -0.526340
H -1.246756   -2.078981   -0.209012
H -1.163242   -1.299478   -1.788045
H -2.825283   -1.097601    1.588751
H -3.724041    0.363165    1.191706
H -3.583811   -1.546334   -0.691214
H -3.150283    0.086366   -1.200241
H -1.234007    1.479831   -1.517184
H  0.218387    0.623982   -1.996228
C  1.535930   -1.397866   -0.480760
H  0.922064   -2.252221   -0.769992
H  1.730382   -0.838562   -1.397976
C  2.859971   -1.915894    0.076287
H  3.297743   -2.656807   -0.593581
H  3.589933   -1.115743    0.200704
H  2.716401   -2.390086    1.049983

```

ax9

```

=====
C -1.068563   -1.865435   -0.939056
C -0.139263   -0.707538   -1.299464
C -0.591551    0.413479    0.951230
H -0.056028    0.580235    1.893451
C -2.183009   -1.386996   -0.012346
C -1.597717   -0.719462    1.233585
H -2.399094   -0.335819    1.869223
H -1.089609   -1.495802    1.813090
H -2.829534   -0.693885   -0.552699
H -2.810485   -2.228138    0.289653
H -1.487827   -2.303660   -1.846637
H -0.501505   -2.656333   -0.439125

```

|   |           |           |           |
|---|-----------|-----------|-----------|
| C | 0.493027  | -0.041890 | -0.061621 |
| C | 1.476614  | -1.052207 | 0.621605  |
| C | 1.417334  | 1.126210  | -0.496221 |
| C | 2.836387  | -0.346942 | 0.699581  |
| H | 1.576901  | -1.946264 | 0.003184  |
| H | 1.123187  | -1.379125 | 1.599242  |
| C | 2.829020  | 0.540593  | -0.542841 |
| H | 1.403000  | 1.912883  | 0.261218  |
| H | 1.099254  | 1.572120  | -1.439414 |
| H | 2.886936  | 0.283299  | 1.591284  |
| H | 3.671706  | -1.045814 | 0.738035  |
| H | 3.607179  | 1.303641  | -0.540716 |
| H | 2.961021  | -0.073185 | -1.437668 |
| H | 0.664542  | -1.056432 | -1.954010 |
| H | -0.708215 | 0.030717  | -1.866839 |
| C | -1.271659 | 1.772144  | 0.672229  |
| H | -2.033417 | 1.902820  | 1.445837  |
| H | -0.539126 | 2.561752  | 0.849358  |
| C | -1.915265 | 2.045171  | -0.688139 |
| H | -2.391729 | 3.027066  | -0.669675 |
| H | -1.177661 | 2.059792  | -1.489557 |
| H | -2.681611 | 1.317375  | -0.948492 |

eq1

```
=====
```

|   |           |           |           |
|---|-----------|-----------|-----------|
| C | 1.928544  | -0.238369 | 0.592986  |
| C | 0.856193  | 0.512403  | -0.204417 |
| H | 1.204873  | 0.573637  | -1.244151 |
| C | -0.171654 | -1.699004 | -0.799313 |
| H | -1.096710 | -2.282778 | -0.788998 |
| H | 0.121779  | -1.597558 | -1.850081 |
| C | 2.211988  | -1.618427 | 0.005970  |
| C | 0.931441  | -2.446639 | -0.052149 |
| H | 1.118179  | -3.406559 | -0.537596 |
| H | 0.605879  | -2.670362 | 0.967297  |
| H | 2.613561  | -1.500506 | -1.005606 |
| H | 2.973388  | -2.134792 | 0.593559  |
| H | 2.846711  | 0.351160  | 0.627515  |
| H | 1.584913  | -0.346619 | 1.628122  |
| C | 0.700046  | 1.951043  | 0.308407  |
| H | -0.260474 | 2.361269  | -0.009932 |
| H | 0.687389  | 1.947828  | 1.401303  |
| C | -0.466369 | -0.289949 | -0.248866 |
| C | -1.169553 | -0.383730 | 1.133499  |
| C | -1.523192 | 0.398514  | -1.166661 |
| C | -2.665244 | -0.246925 | 0.835296  |
| H | -0.860480 | 0.444436  | 1.774243  |
| H | -0.928769 | -1.305788 | 1.661578  |
| C | -2.689350 | 0.816305  | -0.262171 |
| H | -1.882666 | -0.323641 | -1.903011 |
| H | -1.098708 | 1.235573  | -1.722254 |
| H | -3.057945 | -1.188707 | 0.442970  |
| H | -3.252791 | 0.019128  | 1.713870  |
| H | -3.638902 | 0.872155  | -0.794074 |

|   |           |          |           |
|---|-----------|----------|-----------|
| H | -2.496393 | 1.796183 | 0.181270  |
| C | 1.811645  | 2.878199 | -0.178461 |
| H | 1.692935  | 3.883452 | 0.227630  |
| H | 2.797086  | 2.517442 | 0.119016  |
| H | 1.800174  | 2.954518 | -1.267382 |

eq2

```
=====
```

|   |           |           |           |
|---|-----------|-----------|-----------|
| C | 1.653819  | 1.219799  | 0.257559  |
| C | 0.462576  | 0.825529  | -0.622576 |
| H | 0.856616  | 0.732020  | -1.642811 |
| C | 1.142744  | -1.565499 | -0.451171 |
| H | 0.813907  | -2.575227 | -0.189832 |
| H | 1.418331  | -1.585514 | -1.511589 |
| C | 2.816434  | 0.245194  | 0.079981  |
| C | 2.369216  | -1.184253 | 0.376764  |
| H | 3.182247  | -1.886220 | 0.181665  |
| H | 2.130359  | -1.267790 | 1.441054  |
| H | 3.175686  | 0.304046  | -0.952350 |
| H | 3.651597  | 0.523236  | 0.725640  |
| H | 1.969036  | 2.235949  | 0.005902  |
| H | 1.356113  | 1.235872  | 1.310091  |
| C | -0.581510 | 1.953015  | -0.711727 |
| H | -0.071225 | 2.800377  | -1.178327 |
| H | -1.369804 | 1.663995  | -1.409829 |
| C | -0.043162 | -0.599789 | -0.270501 |
| C | -0.634231 | -0.724663 | 1.168405  |
| C | -1.207838 | -1.024415 | -1.197277 |
| C | -2.100523 | -1.176588 | 1.014086  |
| H | -0.572677 | 0.220715  | 1.702244  |
| H | -0.070082 | -1.446768 | 1.759247  |
| C | -2.493210 | -0.770859 | -0.409073 |
| H | -1.127213 | -2.095921 | -1.400871 |
| H | -1.175853 | -0.507858 | -2.158128 |
| H | -2.160909 | -2.263385 | 1.103119  |
| H | -2.753746 | -0.751464 | 1.776380  |
| H | -3.341310 | -1.339796 | -0.790384 |
| H | -2.762792 | 0.285207  | -0.441883 |
| C | -1.216969 | 2.455763  | 0.585892  |
| H | -1.787304 | 3.364569  | 0.387593  |
| H | -1.902802 | 1.733405  | 1.026108  |
| H | -0.462259 | 2.701145  | 1.334787  |

eq3

```
=====
```

|   |          |           |           |
|---|----------|-----------|-----------|
| C | 1.666416 | 1.168839  | 0.688423  |
| C | 0.351849 | 1.020877  | -0.091340 |
| H | 0.541322 | 1.402367  | -1.103294 |
| C | 1.177392 | -1.197110 | -0.930856 |
| H | 0.933814 | -2.259412 | -1.022702 |
| H | 1.281245 | -0.808693 | -1.950494 |
| C | 2.826781 | 0.450913  | 0.005537  |
| C | 2.504761 | -1.025750 | -0.196767 |
| H | 3.303199 | -1.519481 | -0.754030 |

|   |           |           |           |
|---|-----------|-----------|-----------|
| H | 2.452994  | -1.516760 | 0.778938  |
| H | 3.006410  | 0.917375  | -0.968532 |
| H | 3.742431  | 0.566481  | 0.588533  |
| H | 1.898562  | 2.230523  | 0.795468  |
| H | 1.532989  | 0.774192  | 1.702141  |
| C | -0.737057 | 1.916408  | 0.533780  |
| H | -1.263954 | 1.382284  | 1.327217  |
| H | -0.230772 | 2.749114  | 1.028195  |
| C | -0.009496 | -0.481257 | -0.258818 |
| C | -0.371077 | -1.166558 | 1.095177  |
| C | -1.275682 | -0.684754 | -1.133574 |
| C | -1.727529 | -1.857157 | 0.882918  |
| H | -0.456060 | -0.427612 | 1.892336  |
| H | 0.395958  | -1.874463 | 1.408062  |
| C | -2.419078 | -0.981393 | -0.162662 |
| H | -1.127897 | -1.564795 | -1.765650 |
| H | -1.459142 | 0.157294  | -1.799558 |
| H | -1.576735 | -2.857237 | 0.469055  |
| H | -2.295166 | -1.964362 | 1.807114  |
| H | -3.267762 | -1.470293 | -0.641146 |
| H | -2.780537 | -0.062876 | 0.304444  |
| C | -1.752721 | 2.518344  | -0.438357 |
| H | -2.365865 | 3.264616  | 0.069461  |
| H | -1.244541 | 3.016862  | -1.266226 |
| H | -2.427856 | 1.776463  | -0.860110 |

eq4

```
=====
```

|   |           |           |           |
|---|-----------|-----------|-----------|
| C | 1.057833  | -0.246325 | -0.224122 |
| H | 1.342964  | -0.215744 | -1.284674 |
| C | 1.771646  | 0.918310  | 0.479682  |
| C | 1.397149  | 2.281069  | -0.093864 |
| H | 1.916009  | 3.074728  | 0.447065  |
| H | 1.724692  | 2.337010  | -1.137008 |
| C | -0.830536 | 1.336571  | -0.736801 |
| C | -0.113127 | 2.484096  | -0.031230 |
| H | -0.392958 | 3.433057  | -0.492740 |
| H | -0.427966 | 2.538102  | 1.014743  |
| H | 1.507879  | 0.893013  | 1.542626  |
| H | -0.554532 | 1.357259  | -1.796689 |
| H | -1.911492 | 1.487102  | -0.694655 |
| H | 2.851946  | 0.772351  | 0.422833  |
| C | 1.562463  | -1.578047 | 0.354255  |
| H | 0.855460  | -2.383007 | 0.152383  |
| H | 1.625053  | -1.492396 | 1.442304  |
| C | -0.477654 | -0.062240 | -0.187269 |
| C | -1.243974 | -1.103341 | -1.025343 |
| C | -1.103765 | -0.280321 | 1.203543  |
| C | -2.694955 | -1.056464 | -0.506525 |
| H | -0.831935 | -2.098445 | -0.859511 |
| H | -1.171238 | -0.893410 | -2.093857 |
| C | -2.604290 | -0.495852 | 0.936661  |
| H | -0.916778 | 0.540228  | 1.895852  |
| H | -0.678189 | -1.183393 | 1.645697  |

|   |           |           |           |
|---|-----------|-----------|-----------|
| H | -3.308409 | -0.406513 | -1.129629 |
| H | -3.155089 | -2.043142 | -0.530031 |
| H | -3.144556 | 0.447634  | 1.011808  |
| H | -3.045998 | -1.172069 | 1.667148  |
| C | 2.926554  | -1.983984 | -0.200003 |
| H | 3.681422  | -1.218090 | -0.018165 |
| H | 3.278684  | -2.908750 | 0.258605  |
| H | 2.870967  | -2.146358 | -1.278009 |

eq5

```
=====
```

|   |           |           |           |
|---|-----------|-----------|-----------|
| C | -1.026804 | 0.460537  | -0.581976 |
| H | -1.253861 | 0.126741  | -1.603194 |
| C | -2.083086 | -0.194823 | 0.317317  |
| C | -2.151140 | -1.701840 | 0.068094  |
| H | -2.882931 | -2.167711 | 0.730851  |
| H | -2.496982 | -1.869603 | -0.956851 |
| C | 0.296754  | -1.642903 | -0.567588 |
| C | -0.782968 | -2.358748 | 0.246755  |
| H | -0.829446 | -3.408787 | -0.048746 |
| H | -0.513728 | -2.347894 | 1.305845  |
| H | -1.850151 | -0.005731 | 1.369155  |
| H | 0.085586  | -1.775476 | -1.633842 |
| H | 1.265631  | -2.110115 | -0.379417 |
| H | -3.058842 | 0.257861  | 0.123543  |
| C | -1.188692 | 1.989866  | -0.641954 |
| H | -2.212217 | 2.162979  | -0.985411 |
| H | -0.545129 | 2.394607  | -1.425177 |
| C | 0.371724  | -0.126209 | -0.279032 |
| C | 1.493853  | 0.502163  | -1.120223 |
| C | 0.919354  | 0.094024  | 1.148464  |
| C | 2.801781  | 0.050689  | -0.448745 |
| H | 1.418268  | 1.589780  | -1.062961 |
| H | 1.431477  | 0.220451  | -2.173398 |
| C | 2.433052  | -0.184634 | 1.039227  |
| H | 0.439343  | -0.537051 | 1.894454  |
| H | 0.758990  | 1.125475  | 1.451406  |
| H | 3.169138  | -0.870218 | -0.900500 |
| H | 3.587800  | 0.795638  | -0.563037 |
| H | 2.657275  | -1.211021 | 1.328776  |
| H | 3.001489  | 0.462413  | 1.705748  |
| C | -0.979734 | 2.797665  | 0.639997  |
| H | 0.075141  | 2.937515  | 0.871172  |
| H | -1.417404 | 3.790741  | 0.528159  |
| H | -1.454015 | 2.324674  | 1.501407  |

eq6

```
=====
```

|   |           |           |           |
|---|-----------|-----------|-----------|
| C | -0.710424 | 0.996059  | -0.293022 |
| H | -0.879153 | 1.171305  | -1.364095 |
| C | -2.081404 | 0.720443  | 0.356186  |
| C | -2.780598 | -0.534992 | -0.149679 |
| H | -3.728719 | -0.671366 | 0.374035  |
| H | -3.014516 | -0.421568 | -1.213090 |

|   |           |           |           |
|---|-----------|-----------|-----------|
| C | -0.547505 | -1.496182 | -0.670184 |
| C | -1.874688 | -1.745152 | 0.035524  |
| H | -2.343673 | -2.646047 | -0.364694 |
| H | -1.711081 | -1.920117 | 1.102857  |
| H | -1.935884 | 0.628817  | 1.438366  |
| H | -0.750598 | -1.370030 | -1.739226 |
| H | 0.099200  | -2.371219 | -0.581213 |
| H | -2.721194 | 1.592304  | 0.203229  |
| C | -0.211833 | 2.317124  | 0.325772  |
| H | -0.151957 | 2.195699  | 1.410616  |
| H | -1.013453 | 3.041169  | 0.159010  |
| C | 0.218606  | -0.240989 | -0.191211 |
| C | 1.497725  | -0.165234 | -1.053036 |
| C | 0.813846  | -0.461851 | 1.211609  |
| C | 2.460895  | -1.211288 | -0.449854 |
| H | 1.947822  | 0.819437  | -0.991927 |
| H | 1.278848  | -0.357174 | -2.104859 |
| C | 1.972136  | -1.450990 | 1.002143  |
| H | 0.085245  | -0.815055 | 1.941787  |
| H | 1.211783  | 0.486370  | 1.579045  |
| H | 2.437510  | -2.139946 | -1.018868 |
| H | 3.489116  | -0.853196 | -0.473022 |
| H | 1.623584  | -2.476664 | 1.121436  |
| H | 2.765299  | -1.299518 | 1.732856  |
| C | 1.086507  | 2.946156  | -0.175824 |
| H | 1.135488  | 2.951920  | -1.266245 |
| H | 1.145640  | 3.981774  | 0.162963  |
| H | 1.971118  | 2.434467  | 0.200490  |

eq7

|   |           |           |           |
|---|-----------|-----------|-----------|
| C | 2.058694  | -1.523876 | -0.549591 |
| C | 0.801802  | -1.759497 | 0.281598  |
| H | 1.100704  | -1.928155 | 1.321663  |
| C | 0.559551  | 0.695819  | 0.717407  |
| H | 0.856349  | 0.470820  | 1.749789  |
| C | 2.787032  | -0.281350 | -0.045535 |
| C | 1.854380  | 0.925988  | -0.073831 |
| H | 2.362587  | 1.809417  | 0.322578  |
| H | 1.609802  | 1.151809  | -1.115474 |
| H | 3.125860  | -0.457532 | 0.980362  |
| H | 3.676329  | -0.083846 | -0.647082 |
| H | 2.710619  | -2.398098 | -0.501581 |
| H | 1.788366  | -1.385246 | -1.601287 |
| C | -0.187938 | -0.580331 | 0.241954  |
| C | -0.814523 | -0.442424 | -1.174762 |
| C | -1.399960 | -0.914293 | 1.163091  |
| C | -2.310453 | -0.213502 | -0.945654 |
| H | -0.687880 | -1.385952 | -1.713053 |
| H | -0.342767 | 0.329809  | -1.779040 |

|   |           |           |           |
|---|-----------|-----------|-----------|
| C | -2.603934 | -1.136258 | 0.237373  |
| H | -1.606356 | -0.088496 | 1.843808  |
| H | -1.191834 | -1.787659 | 1.782093  |
| H | -2.499795 | 0.823605  | -0.658508 |
| H | -2.914272 | -0.432566 | -1.826438 |
| H | -3.557085 | -0.931373 | 0.724423  |
| H | -2.624685 | -2.171825 | -0.111048 |
| H | 0.281437  | -2.662833 | -0.048792 |
| C | -0.268533 | 1.997732  | 0.794782  |
| H | 0.216402  | 2.638499  | 1.536209  |
| H | -1.261355 | 1.784998  | 1.193619  |
| C | -0.418917 | 2.823450  | -0.485137 |
| H | -0.925309 | 2.282959  | -1.282836 |
| H | -1.007439 | 3.717677  | -0.273727 |
| H | 0.547112  | 3.155231  | -0.865842 |

eq8

```
=====
```

|   |           |           |           |
|---|-----------|-----------|-----------|
| C | -2.517260 | -1.048361 | 0.068765  |
| C | -1.247434 | -1.315292 | -0.728965 |
| H | -1.435892 | -1.061991 | -1.778130 |
| C | -0.379140 | 1.004948  | -0.277639 |
| H | -0.518667 | 1.262374  | -1.335976 |
| C | -2.873998 | 0.430128  | -0.026725 |
| C | -1.707725 | 1.290996  | 0.446156  |
| H | -1.951420 | 2.347977  | 0.318980  |
| H | -1.563795 | 1.135976  | 1.520876  |
| H | -3.105783 | 0.673066  | -1.068719 |
| H | -3.766617 | 0.655373  | 0.559970  |
| H | -3.334664 | -1.667866 | -0.304884 |
| H | -2.362607 | -1.321220 | 1.117533  |
| C | -0.027576 | -0.510672 | -0.243052 |
| C | 0.414743  | -0.978146 | 1.168564  |
| C | 1.183076  | -0.862073 | -1.160836 |
| C | 1.945274  | -0.987327 | 1.153358  |
| H | 0.055181  | -1.997392 | 1.334907  |
| H | 0.005576  | -0.360386 | 1.968297  |
| C | 2.282551  | -1.462569 | -0.263157 |
| H | 1.536494  | 0.019654  | -1.689688 |
| H | 0.879514  | -1.577653 | -1.925791 |
| H | 2.334027  | 0.017278  | 1.320784  |
| H | 2.366970  | -1.633239 | 1.923823  |
| H | 3.286542  | -1.177994 | -0.578987 |
| H | 2.228805  | -2.552637 | -0.295826 |
| H | -0.988476 | -2.377260 | -0.703060 |
| C | 0.670086  | 1.970427  | 0.304528  |
| H | 0.888560  | 1.681122  | 1.336185  |
| H | 0.182306  | 2.946208  | 0.373897  |
| C | 1.977315  | 2.176432  | -0.461272 |
| H | 1.783364  | 2.394348  | -1.513512 |
| H | 2.518370  | 3.027036  | -0.043401 |
| H | 2.642743  | 1.316273  | -0.415627 |

eq9

```

=====
C  -0.112736    -1.807333    -0.650123
H   0.199290    -1.811212    -1.699991
C   1.012971    -2.400807     0.188994
C   2.265160    -1.542960     0.043499
H   3.078941    -1.936536     0.655514
H   2.602077    -1.579352    -0.997522
C   0.799046     0.520718    -0.343723
C   1.975441    -0.094893     0.429424
H   2.870174     0.508518     0.272052
H   1.753336    -0.047901     1.501333
H   0.715510    -2.436528     1.241705
H   1.077596     0.547580    -1.406321
H   1.212066    -3.428505    -0.120402
C  -0.472977    -0.364668    -0.252893
C  -1.600929     0.139220    -1.199979
C  -1.118862    -0.333550     1.165468
C  -2.890337     0.122184    -0.371361
H  -1.670442    -0.482967    -2.092956
H  -1.399554     1.156282    -1.536884
C  -2.400875     0.494440     1.027758
H  -0.446817     0.053294     1.930767
H  -1.386437    -1.350612     1.462448
H  -3.655328     0.794162    -0.759940
H  -3.311279    -0.886417    -0.351150
H  -2.168754     1.561388     1.063303
H  -3.127245     0.283641     1.812733
H  -1.013987    -2.423462    -0.584965
C   0.569316     1.968851     0.112382
H  -0.330273     2.368258    -0.356499
H   0.384392     1.979364     1.190360
C   1.730868     2.908980    -0.207009
H   1.468609     3.940492     0.031035
H   2.628283     2.662446     0.359524
H   1.983318     2.866971    -1.268770

```

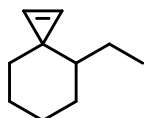

4-ethylspiro[2.5]oct-1-ene

| Conformation | Electronic Energy | Enthalpy    | Gibbs Free Energy |
|--------------|-------------------|-------------|-------------------|
| ax1          | -390.560141       | -390.313124 | -390.358569       |
| ax2          | -390.559990       | -390.312881 | -390.358749       |
| ax3          | -390.554574       | -390.307289 | -390.353911       |
| eq1          | -390.561177       | -390.314249 | -390.359655       |
| eq2          | -390.559969       | -390.312873 | -390.357925       |



eq3 | -390.561793 | -390.314884 | -390.360496

ax1

```
=====
C 0.216376 0.862273 0.024098
C 0.381746 -0.482990 0.733901
H 0.971506 -0.303540 1.637861
C 1.291802 1.908283 0.089741
C -1.003105 -1.002548 1.154738
C -1.985739 -1.076023 -0.017588
H -2.964885 -1.395746 0.343736
H -1.655333 -1.832702 -0.733841
C -0.727317 0.784982 -1.168917
C -2.101921 0.272232 -0.729405
H -2.771010 0.191188 -1.588040
H -2.546320 1.001770 -0.044492
H 2.258751 2.219329 -0.267985
H -0.902819 -1.984051 1.624700
H -0.815619 1.770153 -1.629159
H -0.315652 0.109636 -1.926864
H -1.413672 -0.326769 1.911357
C 1.139548 -1.524278 -0.101972
H 1.239361 -2.429717 0.502777
H 0.553130 -1.807039 -0.978358
C 2.521404 -1.061733 -0.554198
H 3.072984 -1.878452 -1.021330
H 2.451878 -0.251384 -1.280194
H 3.110485 -0.700641 0.291914
C 0.262892 2.130246 0.837433
H -0.246907 2.755299 1.550941
```

ax2

```
=====
C 0.937019 -0.619628 -0.042491
C -0.497658 -0.473434 0.470749
H -0.640946 -1.214928 1.262556
C 1.551379 -1.984581 -0.166714
C -0.682364 0.921361 1.088860
C -0.305230 2.041102 0.118447
H -0.436475 3.010990 0.601486
H -0.974802 2.026987 -0.746744
C 1.358364 0.500941 -0.987555
C 1.139157 1.877460 -0.354643
H 1.401320 2.664308 -1.064271
H 1.808138 1.985066 0.505353
H 1.587968 -2.900304 -0.732204
H -1.706084 1.048817 1.444168
H 2.406625 0.367453 -1.258897
H 0.778354 0.440397 -1.914148
H -0.035102 0.992974 1.968684
C -1.515556 -0.793305 -0.633775
H -1.373552 -0.124187 -1.484778
```

|   |           |           |           |
|---|-----------|-----------|-----------|
| H | -1.303152 | -1.801955 | -0.998822 |
| C | -2.969186 | -0.722135 | -0.174906 |
| H | -3.640242 | -1.103617 | -0.945251 |
| H | -3.123351 | -1.317936 | 0.727521  |
| H | -3.273018 | 0.301405  | 0.046076  |
| C | 1.970526  | -1.279619 | 0.830994  |
| H | 2.605614  | -1.184444 | 1.695483  |

ax3

```
=====
```

|   |           |           |           |
|---|-----------|-----------|-----------|
| C | -1.012435 | -0.109836 | -0.016324 |
| C | 0.046351  | 0.574945  | 0.864874  |
| H | -0.462122 | 0.814826  | 1.802579  |
| C | -2.313086 | 0.606817  | -0.249663 |
| C | 1.204173  | -0.373623 | 1.237722  |
| C | 1.696918  | -1.289361 | 0.115106  |
| H | 2.436039  | -1.983683 | 0.519596  |
| H | 2.198165  | -0.714390 | -0.666001 |
| C | -0.483797 | -1.066138 | -1.081278 |
| C | 0.531475  | -2.051451 | -0.506334 |
| H | 0.886346  | -2.725770 | -1.287716 |
| H | 0.049925  | -2.668665 | 0.259298  |
| H | -2.808399 | 1.409018  | -0.769963 |
| H | 2.033607  | 0.213629  | 1.640234  |
| H | -1.328174 | -1.595472 | -1.525802 |
| H | 0.000697  | -0.505354 | -1.886071 |
| H | 0.858466  | -1.019670 | 2.050428  |
| C | 0.499001  | 1.938724  | 0.317692  |
| H | -0.387990 | 2.575455  | 0.245834  |
| H | 1.144704  | 2.400806  | 1.069681  |
| C | 1.218793  | 1.958728  | -1.028000 |
| H | 1.470854  | 2.984564  | -1.301442 |
| H | 2.148586  | 1.391007  | -1.000432 |
| H | 0.595450  | 1.552617  | -1.824626 |
| C | -2.370002 | -0.378333 | 0.582132  |
| H | -2.940498 | -0.991744 | 1.258842  |

eq1

```
=====
```

|   |           |           |           |
|---|-----------|-----------|-----------|
| C | 0.002915  | 0.812332  | -0.115453 |
| C | 0.377534  | -0.674258 | -0.206275 |
| H | 0.367601  | -0.950541 | -1.269102 |
| C | 1.022489  | 1.911759  | -0.051165 |
| C | -0.716565 | -1.496464 | 0.491179  |
| C | -2.105521 | -1.228680 | -0.086242 |
| H | -2.855824 | -1.811549 | 0.451347  |
| H | -2.127396 | -1.565244 | -1.127770 |
| C | -1.365464 | 1.085292  | -0.728431 |
| C | -2.450342 | 0.258130  | -0.037137 |
| H | -3.422041 | 0.439618  | -0.500258 |
| H | -2.528042 | 0.576611  | 1.007391  |
| H | 1.724946  | 2.513888  | -0.602113 |
| H | -0.478360 | -2.559608 | 0.412173  |
| H | -1.591474 | 2.150362  | -0.658075 |

|   |           |           |           |
|---|-----------|-----------|-----------|
| H | -1.343236 | 0.825270  | -1.792850 |
| H | -0.710268 | -1.247215 | 1.558694  |
| C | 1.755926  | -1.018369 | 0.356496  |
| H | 1.868264  | -0.557770 | 1.342603  |
| H | 1.799443  | -2.098173 | 0.517287  |
| C | 2.918034  | -0.613877 | -0.545350 |
| H | 3.873243  | -0.915912 | -0.113935 |
| H | 2.826763  | -1.092285 | -1.522389 |
| H | 2.955669  | 0.462945  | -0.708991 |
| C | 0.446147  | 1.631057  | 1.069730  |
| H | 0.329795  | 1.828065  | 2.121881  |

eq2

```
=====
```

|   |           |           |           |
|---|-----------|-----------|-----------|
| C | -0.106589 | 0.925398  | -0.198880 |
| C | 0.367564  | -0.451634 | -0.679698 |
| H | 0.028181  | -0.534042 | -1.720399 |
| C | 0.766884  | 2.141189  | -0.329813 |
| C | -0.355699 | -1.552538 | 0.107613  |
| C | -1.874124 | -1.423279 | -0.005510 |
| H | -2.364114 | -2.207928 | 0.573972  |
| H | -2.170766 | -1.564575 | -1.049729 |
| C | -1.621279 | 1.062345  | -0.307196 |
| C | -2.339220 | -0.046241 | 0.465017  |
| H | -3.420349 | 0.051332  | 0.350144  |
| H | -2.119021 | 0.061490  | 1.531990  |
| H | 1.193109  | 2.871117  | -0.996968 |
| H | -0.029494 | -2.534608 | -0.245693 |
| H | -1.926496 | 2.044408  | 0.057347  |
| H | -1.911727 | 1.001629  | -1.362461 |
| H | -0.073719 | -1.483518 | 1.162763  |
| C | 1.888523  | -0.640923 | -0.698102 |
| H | 2.117109  | -1.475493 | -1.365407 |
| H | 2.346895  | 0.243073  | -1.149178 |
| C | 2.541124  | -0.917136 | 0.655449  |
| H | 3.626072  | -0.958860 | 0.551162  |
| H | 2.309317  | -0.146156 | 1.390532  |
| H | 2.214416  | -1.873056 | 1.065155  |
| C | 0.622494  | 1.690729  | 0.871853  |
| H | 0.842523  | 1.777732  | 1.922366  |

eq3

```
=====
```

|   |           |           |           |
|---|-----------|-----------|-----------|
| C | -0.475183 | 0.907204  | -0.185600 |
| C | 0.596600  | -0.180394 | -0.332814 |
| H | 0.633559  | -0.455050 | -1.395963 |
| C | -0.128662 | 2.366348  | -0.261112 |
| C | 0.159888  | -1.428077 | 0.447781  |
| C | -1.224406 | -1.920110 | 0.024878  |
| H | -1.510727 | -2.789241 | 0.620078  |
| H | -1.180264 | -2.249996 | -1.018108 |
| C | -1.847059 | 0.421963  | -0.635330 |
| C | -2.272933 | -0.817646 | 0.152773  |
| H | -3.245115 | -1.174111 | -0.192790 |

|   |           |           |           |
|---|-----------|-----------|-----------|
| H | -2.386093 | -0.547427 | 1.207605  |
| H | 0.138832  | 3.192195  | -0.898458 |
| H | 0.887182  | -2.230185 | 0.313657  |
| H | -2.576628 | 1.224394  | -0.516115 |
| H | -1.809917 | 0.169285  | -1.701180 |
| H | 0.149252  | -1.180990 | 1.516057  |
| C | 1.988739  | 0.299147  | 0.072687  |
| H | 2.217397  | 1.215437  | -0.477752 |
| H | 1.978055  | 0.577889  | 1.131199  |
| C | 3.094166  | -0.722032 | -0.178603 |
| H | 4.075207  | -0.285301 | 0.010999  |
| H | 2.995266  | -1.595689 | 0.465218  |
| H | 3.077593  | -1.067253 | -1.214656 |
| C | -0.384732 | 1.921106  | 0.923821  |
| H | -0.482105 | 2.110985  | 1.979311  |

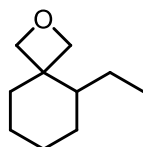

5-ethyl-2-oxaspiro[3.5]nonane

| Conformation | Electronic Energy | Enthalpy    | Gibbs Free Energy |
|--------------|-------------------|-------------|-------------------|
| ax1          | -467.042000       | -466.762774 | -466.810698       |
| ax2          | -467.041067       | -466.761621 | -466.808373       |
| ax3          | -467.034823       | -466.755212 | -466.802624       |
| ax4          | -467.034952       | -466.755325 | -466.802987       |
| eq1          | -467.041523       | -466.762337 | -466.810453       |
| eq2          | -467.037987       | -466.758507 | -466.805661       |
| eq3          | -467.041524       | -466.762336 | -466.810444       |

ax1

|   |          |           |          |
|---|----------|-----------|----------|
| C | 0.594171 | -0.503805 | 0.473581 |
| H | 0.460570 | -1.242187 | 1.272131 |
| C | 1.196515 | 0.766212  | 1.091294 |
| C | 1.269562 | 1.915455  | 0.084553 |

|   |           |           |           |
|---|-----------|-----------|-----------|
| H | 1.678044  | 2.805055  | 0.566727  |
| H | 1.953212  | 1.656468  | -0.728666 |
| C | -0.755530 | 0.967603  | -1.092535 |
| C | -0.115734 | 2.218392  | -0.487927 |
| H | -0.057414 | 3.008789  | -1.237749 |
| H | -0.754907 | 2.592546  | 0.318189  |
| H | 0.562516  | 1.076943  | 1.928604  |
| H | -0.194482 | 0.656050  | -1.977870 |
| H | -1.774905 | 1.182500  | -1.423528 |
| H | 2.181843  | 0.556265  | 1.509148  |
| C | -0.791849 | -0.179912 | -0.084577 |
| C | -1.643839 | -1.371820 | -0.548956 |
| C | -1.915429 | -0.001009 | 0.955718  |
| H | -1.254936 | -2.345212 | -0.237776 |
| H | -1.916732 | -1.402750 | -1.605176 |
| H | -1.650852 | -0.338641 | 1.961483  |
| H | -2.392570 | 0.978596  | 1.008026  |
| C | 1.490183  | -1.152071 | -0.589908 |
| H | 1.655948  | -0.463233 | -1.419717 |
| H | 0.957085  | -2.010642 | -1.007993 |
| C | 2.838115  | -1.617493 | -0.046992 |
| H | 2.706263  | -2.262180 | 0.824557  |
| H | 3.387567  | -2.182415 | -0.800583 |
| H | 3.463447  | -0.775825 | 0.252066  |
| O | -2.750836 | -0.967430 | 0.284078  |

ax2

```
=====
```

|   |           |           |           |
|---|-----------|-----------|-----------|
| C | -0.338659 | 0.677585  | 0.761643  |
| H | 0.207079  | 0.963979  | 1.667359  |
| C | -1.610446 | -0.079057 | 1.179301  |
| C | -2.365847 | -0.651596 | -0.023862 |
| H | -3.228640 | -1.223070 | 0.322601  |
| H | -2.758006 | 0.161686  | -0.638340 |
| C | -0.158038 | -0.834442 | -1.258138 |
| C | -1.459211 | -1.543735 | -0.873445 |
| H | -1.984297 | -1.874714 | -1.770773 |
| H | -1.216117 | -2.444224 | -0.301813 |
| H | -1.329923 | -0.904007 | 1.842455  |
| H | -0.368358 | -0.013344 | -1.949752 |
| H | 0.508537  | -1.526473 | -1.779044 |
| H | -2.260813 | 0.582930  | 1.754937  |
| C | 0.554434  | -0.286058 | -0.022950 |
| C | 2.020819  | 0.103439  | -0.288725 |
| C | 1.199768  | -1.416757 | 0.805658  |
| H | 2.377927  | 0.936567  | 0.320185  |
| H | 2.315615  | 0.248968  | -1.329401 |
| H | 1.195491  | -1.227902 | 1.883227  |
| H | 0.872140  | -2.437749 | 0.607708  |
| C | -0.693510 | 1.969931  | 0.013565  |
| H | -1.331343 | 2.563511  | 0.673981  |

|   |           |           |           |
|---|-----------|-----------|-----------|
| H | -1.297912 | 1.743439  | -0.865813 |
| C | 0.500213  | 2.816779  | -0.417695 |
| H | 1.090079  | 2.320574  | -1.189667 |
| H | 0.162946  | 3.768724  | -0.829404 |
| H | 1.159850  | 3.032904  | 0.424520  |
| O | 2.498575  | -1.151042 | 0.238114  |

ax3

```
=====
```

|   |           |           |           |
|---|-----------|-----------|-----------|
| C | -0.388415 | 0.575529  | 0.829554  |
| H | 0.081492  | 0.988810  | 1.727126  |
| C | -1.238280 | -0.623136 | 1.284441  |
| C | -1.641109 | -1.581236 | 0.156647  |
| H | -2.131829 | -2.455028 | 0.589776  |
| H | -2.366912 | -1.111601 | -0.506501 |
| C | 0.336941  | -0.808981 | -1.197333 |
| C | -0.430818 | -2.018609 | -0.666466 |
| H | -0.745526 | -2.658383 | -1.492344 |
| H | 0.235351  | -2.618276 | -0.038384 |
| H | -0.652193 | -1.193548 | 2.012669  |
| H | -0.285858 | -0.247685 | -1.897854 |
| H | 1.224226  | -1.131062 | -1.748994 |
| H | -2.125598 | -0.264513 | 1.812096  |
| C | 0.771907  | 0.098635  | -0.049807 |
| C | 1.796452  | 1.164499  | -0.471454 |
| C | 1.978300  | -0.506526 | 0.702202  |
| H | 1.714904  | 2.103302  | 0.082614  |
| H | 1.885639  | 1.371385  | -1.539326 |
| H | 1.973891  | -0.317454 | 1.779155  |
| H | 2.210078  | -1.554881 | 0.511354  |
| C | -1.197349 | 1.752530  | 0.241638  |
| H | -0.497761 | 2.445912  | -0.232992 |
| H | -1.623317 | 2.296707  | 1.088325  |
| C | -2.343337 | 1.467964  | -0.729229 |
| H | -3.131960 | 0.884165  | -0.254550 |
| H | -2.786978 | 2.412334  | -1.048745 |
| H | -2.022234 | 0.937308  | -1.623952 |
| O | 2.897355  | 0.373562  | 0.022421  |

ax4

```
=====
```

|   |           |           |           |
|---|-----------|-----------|-----------|
| C | 0.161107  | -0.784020 | 1.227424  |
| H | 1.010544  | -1.185288 | 1.786903  |
| C | -0.790760 | -1.908219 | 0.823220  |
| C | -1.935057 | -1.365317 | -0.029802 |
| H | -2.592648 | -2.179300 | -0.340416 |
| H | -2.542124 | -0.678532 | 0.564382  |
| C | -0.387624 | 0.475055  | -0.948647 |
| C | -1.380744 | -0.655622 | -1.264450 |
| H | -2.191320 | -0.262079 | -1.881102 |
| H | -0.859081 | -1.403955 | -1.871549 |
| H | -0.243256 | -2.659782 | 0.245035  |
| H | 0.120184  | 0.701533  | -1.891041 |
| H | -1.174301 | -2.409512 | 1.713141  |

|   |           |           |           |
|---|-----------|-----------|-----------|
| C | 0.699628  | -0.030070 | 0.008383  |
| C | 1.818633  | 0.963563  | 0.363712  |
| C | 1.847291  | -0.817123 | -0.661821 |
| H | 1.929010  | 1.216847  | 1.419608  |
| H | 1.820541  | 1.875851  | -0.238181 |
| H | 1.981024  | -1.853717 | -0.348874 |
| H | 1.859666  | -0.755419 | -1.752988 |
| C | -1.046608 | 1.810658  | -0.538765 |
| H | -0.364586 | 2.615130  | -0.823494 |
| H | -1.934995 | 1.940601  | -1.162134 |
| H | -0.359279 | -0.096609 | 1.894642  |
| C | -1.425722 | 2.042045  | 0.923790  |
| H | -0.545550 | 2.042624  | 1.568114  |
| H | -1.900461 | 3.019348  | 1.024385  |
| H | -2.121885 | 1.296987  | 1.305520  |
| O | 2.843456  | 0.048698  | -0.078778 |

eq1

```
=====
```

|   |           |           |           |
|---|-----------|-----------|-----------|
| C | 0.548520  | 0.534349  | -0.283683 |
| H | 0.607031  | 0.832166  | -1.338972 |
| C | -0.066934 | 1.696449  | 0.507272  |
| C | -1.470516 | 2.057452  | 0.028104  |
| H | -1.876445 | 2.870618  | 0.632272  |
| H | -1.419431 | 2.418884  | -1.003766 |
| C | -1.790540 | -0.315571 | -0.714372 |
| C | -2.385815 | 0.838049  | 0.088060  |
| H | -3.381646 | 1.082127  | -0.284889 |
| H | -2.502057 | 0.527329  | 1.131941  |
| H | -0.114427 | 1.403902  | 1.562902  |
| H | -1.733217 | -0.031367 | -1.770733 |
| H | -2.433220 | -1.196794 | -0.654408 |
| H | 0.585150  | 2.569236  | 0.452849  |
| C | -0.391419 | -0.682247 | -0.234018 |
| C | 0.177480  | -1.970245 | -0.850981 |
| C | -0.329951 | -1.485452 | 1.081884  |
| H | 1.098092  | -1.885564 | -1.429913 |
| H | -0.557856 | -2.543962 | -1.420649 |
| H | 0.228039  | -1.050521 | 1.911309  |
| H | -1.304544 | -1.829543 | 1.437859  |
| C | 1.975845  | 0.245717  | 0.202785  |
| H | 2.298113  | -0.741657 | -0.130729 |
| H | 1.982198  | 0.218632  | 1.295585  |
| C | 2.990697  | 1.278419  | -0.282230 |
| H | 2.742054  | 2.284150  | 0.057450  |
| H | 3.990495  | 1.045387  | 0.085489  |
| H | 3.032166  | 1.295404  | -1.372915 |
| O | 0.401912  | -2.556244 | 0.447798  |

eq2

```
=====
```

|   |           |          |           |
|---|-----------|----------|-----------|
| C | -0.040342 | 0.748398 | 0.669426  |
| H | 0.343334  | 0.778174 | 1.697089  |
| C | 0.929091  | 1.569026 | -0.189999 |

|   |           |           |           |
|---|-----------|-----------|-----------|
| C | 2.364832  | 1.062317  | -0.061454 |
| H | 3.029906  | 1.643341  | -0.702727 |
| H | 2.705581  | 1.206126  | 0.968588  |
| C | 1.469452  | -1.238492 | 0.426383  |
| C | 2.449462  | -0.421335 | -0.414257 |
| H | 3.466186  | -0.791986 | -0.275436 |
| H | 2.204432  | -0.552368 | -1.473797 |
| H | 0.624944  | 1.510685  | -1.239688 |
| H | 1.748689  | -1.172180 | 1.482954  |
| H | 1.514969  | -2.293020 | 0.145594  |
| H | 0.868810  | 2.621478  | 0.097695  |
| C | 0.041593  | -0.732091 | 0.256432  |
| C | -1.064087 | -1.637638 | 0.822563  |
| C | -0.611154 | -1.083931 | -1.095162 |
| H | -1.677923 | -1.252666 | 1.636022  |
| H | -0.709329 | -2.640626 | 1.074950  |
| H | -0.867816 | -0.271639 | -1.772809 |
| H | -0.066110 | -1.857261 | -1.644248 |
| C | -1.434591 | 1.396762  | 0.742087  |
| H | -1.289280 | 2.360585  | 1.237362  |
| H | -2.073900 | 0.815535  | 1.408933  |
| C | -2.187286 | 1.647876  | -0.565703 |
| H | -2.561326 | 0.724131  | -1.002627 |
| H | -3.048642 | 2.289044  | -0.372829 |
| H | -1.564817 | 2.154200  | -1.304658 |
| O | -1.768691 | -1.642112 | -0.437784 |

eq3

|   |           |           |           |
|---|-----------|-----------|-----------|
| C | 0.548349  | 0.534657  | -0.283556 |
| H | 0.606936  | 0.832404  | -1.338857 |
| C | -0.067640 | 1.696590  | 0.507233  |
| C | -1.471360 | 2.056961  | 0.027996  |
| H | -1.877645 | 2.869998  | 0.632099  |
| H | -1.420429 | 2.418331  | -1.003903 |
| C | -1.790361 | -0.316229 | -0.714377 |
| C | -2.386105 | 0.837152  | 0.088050  |
| H | -3.382071 | 1.080759  | -0.284850 |
| H | -2.502136 | 0.526410  | 1.131947  |
| H | -0.115060 | 1.404138  | 1.562892  |
| H | -1.733141 | -0.032002 | -1.770736 |
| H | -2.432679 | -1.197719 | -0.654423 |
| H | 0.584126  | 2.569616  | 0.452744  |
| C | -0.391085 | -0.682321 | -0.233986 |
| C | 0.178330  | -1.970037 | -0.851048 |
| C | -0.329365 | -1.485560 | 1.081858  |
| H | 1.099092  | -1.885016 | -1.429708 |
| H | -0.556676 | -2.543851 | -1.421042 |
| H | 0.228703  | -1.050539 | 1.911189  |
| H | -1.303843 | -1.829783 | 1.438016  |
| C | 1.975673  | 0.246572  | 0.203258  |
| H | 2.298080  | -0.741049 | -0.129416 |



|   |          |           |           |
|---|----------|-----------|-----------|
| H | 1.981910 | 0.220297  | 1.296077  |
| C | 2.990369 | 1.279071  | -0.282465 |
| H | 2.741068 | 2.285085  | 0.055908  |
| H | 3.990088 | 1.046929  | 0.086026  |
| H | 3.032347 | 1.294788  | -1.373146 |
| O | 0.402563 | -2.556241 | 0.447675  |

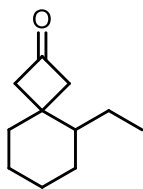

5-ethylspiro[3.5]nonan-2-one

| Conformation | Electronic Energy | Enthalpy    | Gibbs Free Energy |
|--------------|-------------------|-------------|-------------------|
| ax1          | -505.163865       | -504.879934 | -504.92966        |
| ax2          | -505.161644       | -504.87772  | -504.927125       |
| ax3          | -505.156695       | -504.872499 | -504.922124       |
| ax4          | -505.156544       | -504.872386 | -504.921807       |
| ax5          | -505.155565       | -504.872502 | -504.920387       |
| eq1          | -505.162680       | -504.878904 | -504.929138       |
| eq2          | -505.160052       | -504.876099 | -504.925374       |
| eq3          | -505.160310       | -504.876411 | -504.925573       |
| eq4          | -505.163504       | -504.879786 | -504.929608       |

ax1

|   |           |           |           |
|---|-----------|-----------|-----------|
| C | 0.795861  | -0.553954 | 0.486447  |
| H | 0.555002  | -1.257196 | 1.291973  |
| C | 1.561918  | 0.628463  | 1.096589  |
| C | 1.809621  | 1.737883  | 0.073365  |
| H | 2.339583  | 2.566915  | 0.545116  |
| H | 2.454345  | 1.367717  | -0.728657 |
| C | -0.326467 | 1.075823  | -1.104111 |

|   |           |           |           |
|---|-----------|-----------|-----------|
| C | 0.487463  | 2.229758  | -0.517086 |
| H | 0.666765  | 2.984981  | -1.283921 |
| H | -0.092903 | 2.713884  | 0.274208  |
| H | 0.968492  | 1.038498  | 1.919966  |
| H | 0.183901  | 0.675799  | -1.984185 |
| H | -1.301404 | 1.436015  | -1.445983 |
| H | 2.502336  | 0.287656  | 1.531098  |
| C | -0.531770 | -0.049667 | -0.087576 |
| C | -1.501314 | -1.144692 | -0.625337 |
| C | -1.602401 | 0.350631  | 0.980630  |
| H | -1.279125 | -2.131332 | -0.211157 |
| H | -1.660345 | -1.220139 | -1.700397 |
| H | -1.412541 | -0.108407 | 1.953635  |
| H | -1.845921 | 1.404166  | 1.109943  |
| C | 1.609360  | -1.331720 | -0.556792 |
| H | 1.834225  | -0.697830 | -1.416195 |
| H | 0.988430  | -2.148238 | -0.933610 |
| C | 2.910511  | -1.909423 | -0.006809 |
| H | 2.728877  | -2.482693 | 0.904957  |
| H | 3.377358  | -2.575740 | -0.732724 |
| H | 3.630889  | -1.126028 | 0.229981  |
| C | -2.594005 | -0.476812 | 0.185921  |
| O | -3.793828 | -0.508221 | 0.140563  |

ax2

```
=====
```

|   |           |           |           |
|---|-----------|-----------|-----------|
| C | -0.867103 | 0.493086  | 0.746838  |
| H | -0.503075 | 0.988005  | 1.654315  |
| C | -1.714525 | -0.721436 | 1.162209  |
| C | -2.148364 | -1.562168 | -0.042234 |
| H | -2.708249 | -2.434031 | 0.300343  |
| H | -2.827167 | -0.984356 | -0.673526 |
| C | -0.037917 | -0.834632 | -1.243121 |
| C | -0.940868 | -2.011638 | -0.866732 |
| H | -1.268772 | -2.531646 | -1.768203 |
| H | -0.362685 | -2.732389 | -0.281683 |
| H | -1.128063 | -1.351336 | 1.837918  |
| H | -0.551206 | -0.181938 | -1.955174 |
| H | 0.862113  | -1.199696 | -1.746854 |
| H | -2.589179 | -0.383664 | 1.721837  |
| C | 0.362783  | -0.016069 | -0.014371 |
| C | 1.496523  | 1.005536  | -0.345712 |
| C | 1.380703  | -0.812477 | 0.870433  |
| H | 1.472611  | 1.876423  | 0.312212  |
| H | 1.630736  | 1.322305  | -1.378986 |
| H | 1.307245  | -0.536099 | 1.925111  |
| H | 1.434187  | -1.895453 | 0.774555  |
| C | -1.731592 | 1.511660  | -0.011461 |
| H | -2.598722 | 1.723523  | 0.620013  |
| H | -2.128125 | 1.065622  | -0.924604 |
| C | -1.050623 | 2.831772  | -0.363592 |
| H | -0.301669 | 2.709533  | -1.144937 |
| H | -1.786290 | 3.550292  | -0.727243 |
| H | -0.559843 | 3.270279  | 0.507558  |

|   |          |           |          |
|---|----------|-----------|----------|
| C | 2.476666 | -0.013145 | 0.196721 |
| O | 3.656507 | -0.187289 | 0.051685 |

ax3

```
=====
C -0.698630    0.555031    0.858041
H -0.256265    0.924553    1.788489
C -1.600524   -0.633378    1.235615
C -1.976479   -1.545454    0.061846
H -2.522165   -2.410611    0.443376
H -2.646891   -1.030607   -0.625909
C  0.090778   -0.810472   -1.166786
C -0.740089   -2.006172   -0.706880
H -1.032107   -2.612335   -1.565826
H -0.129631   -2.644922   -0.061826
H -1.068007   -1.241758    1.973625
H -0.476271   -0.221052   -1.890408
H  0.994453   -1.151657   -1.681343
H -2.501891   -0.262702    1.730197
C  0.491536    0.073963    0.014701
C  1.512712    1.171120   -0.411053
C  1.626904   -0.629479    0.836940
H  1.464813    2.049304    0.237566
H  1.546516    1.480429   -1.454992
H  1.607598   -0.353640    1.893428
H  1.760832   -1.705125    0.736361
C -1.458337    1.772522    0.292050
H -0.723377    2.498662   -0.063421
H -1.958472    2.249284    1.139181
C -2.512432    1.565990   -0.795371
H -3.346434    0.964764   -0.434173
H -2.917044    2.534638   -1.093333
H -2.113481    1.089223   -1.689365
C  2.606156    0.243791    0.078094
O  3.783532    0.162347   -0.145600
```

ax4

```
=====
C -0.479348   -0.823662    1.325671
H  0.164900   -1.341687    2.040703
C -1.483878   -1.797285    0.713672
C -2.340474   -1.096138   -0.338553
H -3.033252   -1.805365   -0.795228
H -2.948403   -0.325122    0.139750
C -0.383713    0.487279   -0.885400
C -1.453437   -0.481032   -1.420704
H -2.059277    0.033865   -2.168817
H -0.945632   -1.300163   -1.939772
H -0.944921   -2.624969    0.240554
H  0.329139    0.629910   -1.705340
H -2.109632   -2.230076    1.495712
C  0.405196   -0.181362    0.258450
C  1.559812    0.715959    0.802921
C  1.473097   -1.170207   -0.324463
```

|   |           |           |           |
|---|-----------|-----------|-----------|
| H | 1.748084  | 0.546315  | 1.865664  |
| H | 1.535546  | 1.785478  | 0.601554  |
| H | 1.633304  | -2.040847 | 0.315410  |
| H | 1.376300  | -1.487942 | -1.361743 |
| C | -0.913298 | 1.908487  | -0.590121 |
| H | -0.082031 | 2.606359  | -0.710943 |
| H | -1.623346 | 2.158803  | -1.382383 |
| H | -1.017324 | -0.056763 | 1.883426  |
| C | -1.557402 | 2.203626  | 0.764048  |
| H | -0.845124 | 2.079250  | 1.580437  |
| H | -1.896899 | 3.240444  | 0.784596  |
| H | -2.419415 | 1.571401  | 0.970335  |
| C | 2.513461  | -0.104020 | -0.043346 |
| O | 3.637236  | 0.073906  | -0.428371 |

ax5

```
=====
```

|   |           |           |           |
|---|-----------|-----------|-----------|
| C | -0.227345 | -0.925794 | 1.284018  |
| H | 0.513183  | -1.398063 | 1.934795  |
| C | -1.091919 | -1.988198 | 0.607239  |
| C | -2.098656 | -1.349789 | -0.348043 |
| H | -2.648828 | -2.127125 | -0.881965 |
| H | -2.831508 | -0.794130 | 0.235798  |
| C | -0.458383 | 0.606476  | -0.752538 |
| C | -1.411194 | -0.434125 | -1.368648 |
| H | -2.159533 | 0.076637  | -1.979685 |
| H | -0.834449 | -1.066777 | -2.049582 |
| H | -0.442792 | -2.669831 | 0.048425  |
| H | 0.182918  | 0.967133  | -1.564444 |
| H | -1.610178 | -2.588376 | 1.356729  |
| C | 0.497244  | -0.081801 | 0.241221  |
| C | 1.602132  | 0.862604  | 0.810140  |
| C | 1.602389  | -0.900622 | -0.514031 |
| H | 1.802542  | 0.721710  | 1.874031  |
| H | 1.518207  | 1.927573  | 0.598264  |
| H | 1.811725  | -1.876661 | -0.071406 |
| H | 1.500794  | -1.007921 | -1.593998 |
| C | -1.174947 | 1.874584  | -0.239256 |
| H | -0.466293 | 2.470845  | 0.338199  |
| H | -1.411742 | 2.474071  | -1.122080 |
| H | -0.844551 | -0.285954 | 1.918973  |
| C | -2.467581 | 1.739374  | 0.566250  |
| H | -2.343621 | 1.159846  | 1.479564  |
| H | -2.815296 | 2.732996  | 0.853654  |
| H | -3.259898 | 1.277863  | -0.022776 |
| C | 2.607047  | 0.138497  | -0.062605 |
| O | 3.758325  | 0.344866  | -0.336872 |

eq1

```
=====
```

|   |           |           |           |
|---|-----------|-----------|-----------|
| C | -0.982077 | -0.405182 | 0.249960  |
| H | -1.330542 | -0.393493 | 1.291118  |
| C | -1.900213 | 0.512387  | -0.569128 |
| C | -1.898100 | 1.953029  | -0.066253 |

|   |           |           |           |
|---|-----------|-----------|-----------|
| H | -2.553123 | 2.569038  | -0.684716 |
| H | -2.297422 | 1.982186  | 0.952392  |
| C | 0.446262  | 1.618924  | 0.750156  |
| C | -0.478945 | 2.513700  | -0.067628 |
| H | -0.463019 | 3.529445  | 0.330667  |
| H | -0.115962 | 2.570025  | -1.098552 |
| H | -1.555338 | 0.496551  | -1.609779 |
| H | 0.127050  | 1.630982  | 1.797571  |
| H | 1.470184  | 2.003806  | 0.727538  |
| H | -2.915916 | 0.113812  | -0.568327 |
| C | 0.443679  | 0.165081  | 0.268791  |
| C | 1.527928  | -0.639825 | 1.049569  |
| C | 1.279882  | 0.002286  | -1.043049 |
| H | 1.275657  | -1.684899 | 1.230624  |
| H | 1.908175  | -0.193778 | 1.968287  |
| H | 0.919710  | -0.799748 | -1.690136 |
| H | 1.482862  | 0.890605  | -1.640006 |
| C | -1.083030 | -1.847892 | -0.264979 |
| H | -0.215709 | -2.431244 | 0.048065  |
| H | -1.068408 | -1.838033 | -1.358036 |
| C | -2.344229 | -2.561439 | 0.216483  |
| H | -3.248412 | -2.032172 | -0.085842 |
| H | -2.402279 | -3.571662 | -0.189850 |
| H | -2.351050 | -2.638371 | 1.305181  |
| C | 2.417035  | -0.495923 | -0.171689 |
| O | 3.595549  | -0.636742 | -0.354949 |

eq2

```
=====
```

|   |           |           |           |
|---|-----------|-----------|-----------|
| C | 0.428739  | 0.777680  | 0.676315  |
| H | 0.846195  | 0.705181  | 1.688327  |
| C | 1.547861  | 1.300496  | -0.231219 |
| C | 2.794754  | 0.421101  | -0.158320 |
| H | 3.565234  | 0.801418  | -0.831182 |
| H | 3.205247  | 0.461053  | 0.855420  |
| C | 1.330323  | -1.546270 | 0.389610  |
| C | 2.453604  | -1.026885 | -0.504244 |
| H | 3.335086  | -1.662833 | -0.408416 |
| H | 2.133140  | -1.081054 | -1.549922 |
| H | 1.194943  | 1.327931  | -1.266441 |
| H | 1.669955  | -1.561667 | 1.430543  |
| H | 1.069762  | -2.572610 | 0.120253  |
| H | 1.788702  | 2.329653  | 0.046924  |
| C | 0.080981  | -0.674695 | 0.295017  |
| C | -1.156473 | -1.243080 | 1.053420  |
| C | -0.701605 | -0.826757 | -1.051661 |
| H | -1.500524 | -0.753039 | 1.962051  |
| H | -1.053689 | -2.316563 | 1.227942  |
| H | -0.689218 | -0.024642 | -1.785260 |
| H | -0.454958 | -1.772607 | -1.540744 |
| C | -0.732682 | 1.784281  | 0.791078  |
| H | -0.331039 | 2.642705  | 1.335265  |
| H | -1.516979 | 1.373428  | 1.430303  |
| C | -1.364841 | 2.313622  | -0.498544 |

|   |           |           |           |
|---|-----------|-----------|-----------|
| H | -1.966013 | 1.567249  | -1.014181 |
| H | -2.026619 | 3.147648  | -0.261182 |
| H | -0.612668 | 2.683864  | -1.195683 |
| C | -1.954363 | -0.999938 | -0.213643 |
| O | -3.126793 | -0.871557 | -0.441358 |

eq3

```
=====
```

|   |           |           |           |
|---|-----------|-----------|-----------|
| C | 0.357898  | 0.982986  | 0.223810  |
| H | 0.562171  | 1.323483  | 1.246951  |
| C | 1.608139  | 1.266475  | -0.624240 |
| C | 2.852903  | 0.536210  | -0.129373 |
| H | 3.698661  | 0.751529  | -0.784643 |
| H | 3.115930  | 0.907538  | 0.866091  |
| C | 1.382587  | -1.249180 | 0.818463  |
| C | 2.601881  | -0.965865 | -0.051112 |
| H | 3.476474  | -1.484562 | 0.344639  |
| H | 2.425574  | -1.357254 | -1.058496 |
| H | 1.401937  | 0.969454  | -1.658988 |
| H | 1.580284  | -0.913788 | 1.842370  |
| H | 1.184270  | -2.322579 | 0.865476  |
| H | 1.787730  | 2.343152  | -0.638738 |
| C | 0.129925  | -0.541108 | 0.308901  |
| C | -1.164134 | -0.966553 | 1.068656  |
| C | -0.469763 | -1.147321 | -1.003300 |
| H | -1.635556 | -0.283449 | 1.769730  |
| H | -1.021286 | -1.939616 | 1.545533  |
| H | -0.417848 | -0.581465 | -1.931472 |
| H | -0.114238 | -2.166135 | -1.172381 |
| C | -0.804310 | 1.831717  | -0.324153 |
| H | -1.134036 | 1.433209  | -1.287632 |
| H | -0.380426 | 2.813401  | -0.546932 |
| C | -2.014938 | 2.055446  | 0.585173  |
| H | -1.700414 | 2.280162  | 1.606241  |
| H | -2.594620 | 2.906079  | 0.224432  |
| H | -2.689209 | 1.202449  | 0.619022  |
| C | -1.808403 | -1.169989 | -0.288741 |
| O | -2.947014 | -1.209814 | -0.669463 |

eq4

```
=====
```

|   |           |           |           |
|---|-----------|-----------|-----------|
| C | -0.906809 | -1.705620 | 0.702826  |
| H | -1.221310 | -1.524696 | 1.736308  |
| C | -2.124067 | -1.648842 | -0.214609 |
| C | -2.741518 | -0.253836 | -0.191586 |
| H | -3.589254 | -0.198828 | -0.876674 |
| H | -3.127838 | -0.050431 | 0.812144  |
| C | -0.464078 | 0.753956  | 0.344993  |
| C | -1.705774 | 0.808537  | -0.553958 |
| H | -2.160211 | 1.797803  | -0.495972 |
| H | -1.388697 | 0.666757  | -1.593711 |
| H | -1.816019 | -1.891438 | -1.237039 |
| H | -0.787932 | 0.930723  | 1.379227  |
| H | -2.857172 | -2.399811 | 0.084126  |

|   |           |           |           |
|---|-----------|-----------|-----------|
| C | 0.140275  | -0.664083 | 0.322672  |
| C | 1.473748  | -0.790213 | 1.121925  |
| C | 0.921723  | -0.985499 | -0.995463 |
| H | 1.572160  | -1.779878 | 1.573560  |
| H | 1.734689  | -0.026351 | 1.852078  |
| H | 0.832794  | -2.038779 | -1.271196 |
| H | 0.769256  | -0.363632 | -1.875612 |
| C | 0.535452  | 1.860139  | -0.019545 |
| H | 1.445677  | 1.743207  | 0.571325  |
| H | 0.828185  | 1.757840  | -1.068113 |
| H | -0.449565 | -2.697561 | 0.674929  |
| C | -0.002794 | 3.270293  | 0.214501  |
| H | 0.781256  | 4.011497  | 0.057491  |
| H | -0.822378 | 3.513387  | -0.460756 |
| H | -0.366608 | 3.381396  | 1.238053  |
| C | 2.199223  | -0.753786 | -0.210100 |
| O | 3.333835  | -0.522185 | -0.528763 |

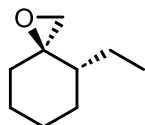

(3*R*,4*R*)-4-ethyl-1-oxaspiro[2.5]octane

| Conformation | Electronic Energy | Enthalpy    | Gibbs Free Energy |
|--------------|-------------------|-------------|-------------------|
| ax1          | -427.741060       | -427.492321 | -427.537918       |
| ax2          | -427.735432       | -427.486553 | -427.531844       |
| ax3          | -427.741610       | -427.49292  | -427.537987       |
| eq1          | -427.741774       | -427.493055 | -427.538418       |
| eq2          | -427.739621       | -427.49096  | -427.536362       |
| eq3          | -427.738991       | -427.490151 | -427.534849       |

ax1

|   |           |           |           |
|---|-----------|-----------|-----------|
| C | 0.850437  | -0.630842 | -0.082383 |
| C | -0.560172 | -0.443937 | 0.440799  |
| H | -0.717205 | -1.198585 | 1.216794  |
| C | 1.443573  | -1.968212 | -0.113008 |
| C | -0.665797 | 0.948523  | 1.081574  |
| C | -0.230418 | 2.059016  | 0.123395  |
| H | -0.305078 | 3.026378  | 0.622325  |
| H | -0.902793 | 2.095487  | -0.738440 |
| C | 1.350417  | 0.450193  | -1.010858 |
| C | 1.203204  | 1.826506  | -0.356641 |
| H | 1.505946  | 2.605493  | -1.057448 |

|   |           |           |           |
|---|-----------|-----------|-----------|
| H | 1.879119  | 1.884997  | 0.501391  |
| H | 2.231039  | -2.187773 | -0.824859 |
| H | 0.859397  | -2.816005 | 0.227405  |
| H | -1.680399 | 1.122763  | 1.441007  |
| H | 2.390885  | 0.245757  | -1.265556 |
| H | 0.771512  | 0.419291  | -1.937368 |
| H | -0.012957 | 0.970121  | 1.958959  |
| O | 1.802016  | -1.035801 | 0.911811  |
| C | -1.587652 | -0.697540 | -0.670296 |
| H | -1.400637 | -1.693640 | -1.079879 |
| H | -1.438858 | 0.005214  | -1.492219 |
| C | -3.033002 | -0.612498 | -0.189775 |
| H | -3.304722 | 0.405007  | 0.091729  |
| H | -3.720739 | -0.930564 | -0.973669 |
| H | -3.194172 | -1.254790 | 0.678498  |

ax2

```
=====
```

|   |           |           |           |
|---|-----------|-----------|-----------|
| C | -0.942217 | 0.338467  | -0.103108 |
| C | 0.266614  | 0.623871  | 0.773744  |
| H | -0.139224 | 1.159850  | 1.634917  |
| C | -1.966780 | 1.373605  | -0.250438 |
| C | 0.873994  | -0.691988 | 1.295691  |
| C | 1.002688  | -1.798445 | 0.242153  |
| H | 1.337429  | -2.715632 | 0.729939  |
| H | 1.760281  | -1.540410 | -0.498935 |
| C | -0.812586 | -0.751850 | -1.137973 |
| C | -0.323929 | -2.039940 | -0.475451 |
| H | -0.216723 | -2.828407 | -1.221307 |
| H | -1.074670 | -2.376650 | 0.245510  |
| H | -2.593986 | 1.382673  | -1.134632 |
| H | -1.831940 | 2.328425  | 0.245869  |
| H | 1.845719  | -0.485661 | 1.750688  |
| H | -1.781955 | -0.896215 | -1.616567 |
| H | -0.104953 | -0.443334 | -1.910210 |
| H | 0.227936  | -1.068558 | 2.093639  |
| O | -2.179684 | 0.266303  | 0.627892  |
| C | 1.282792  | 1.591932  | 0.138641  |
| H | 1.871953  | 2.012127  | 0.957421  |
| H | 0.726146  | 2.427042  | -0.294600 |
| C | 2.260066  | 1.047050  | -0.900665 |
| H | 1.757746  | 0.604932  | -1.760084 |
| H | 2.888797  | 1.858543  | -1.269952 |
| H | 2.921065  | 0.294645  | -0.470393 |

ax3

```
=====
```

|   |           |           |           |
|---|-----------|-----------|-----------|
| C | -0.175922 | 0.812855  | -0.004610 |
| C | -0.417276 | -0.507769 | -0.708804 |
| H | -1.002441 | -0.288439 | -1.606409 |
| C | -1.138482 | 1.908049  | -0.129164 |
| C | 0.940675  | -1.091234 | -1.130998 |
| C | 1.925302  | -1.191209 | 0.038063  |
| H | 2.884608  | -1.564583 | -0.323735 |



|   |           |           |           |
|---|-----------|-----------|-----------|
| H | 1.563526  | -1.915292 | 0.772406  |
| C | 0.774093  | 0.752205  | 1.166537  |
| C | 2.115290  | 0.166545  | 0.716219  |
| H | 2.790188  | 0.077606  | 1.568389  |
| H | 2.579772  | 0.859004  | 0.008330  |
| H | -1.192356 | 2.661027  | 0.649245  |
| H | -2.041684 | 1.759564  | -0.709969 |
| H | 0.789810  | -2.071606 | -1.587603 |
| H | 0.901795  | 1.754239  | 1.577311  |
| H | 0.338490  | 0.125344  | 1.949447  |
| H | 1.374656  | -0.443083 | -1.897416 |
| O | 0.070189  | 1.914392  | -0.892559 |
| C | -1.223136 | -1.490867 | 0.149720  |
| H | -0.650758 | -1.772968 | 1.035201  |
| H | -1.356231 | -2.405223 | -0.433412 |
| C | -2.587354 | -0.960495 | 0.580669  |
| H | -3.172168 | -0.637075 | -0.282709 |
| H | -3.156055 | -1.732744 | 1.099425  |
| H | -2.491805 | -0.109391 | 1.256187  |

eq1

```
=====
```

|   |           |           |           |
|---|-----------|-----------|-----------|
| C | -0.453725 | 0.843417  | -0.134501 |
| C | 0.612599  | -0.232357 | -0.255619 |
| H | 0.678503  | -0.476234 | -1.324087 |
| C | -0.358145 | 1.907703  | 0.871880  |
| C | 0.122330  | -1.485420 | 0.485236  |
| C | -1.249737 | -1.950837 | 0.000667  |
| H | -1.566956 | -2.829023 | 0.565204  |
| H | -1.177697 | -2.253042 | -1.048578 |
| C | -1.819926 | 0.416253  | -0.614627 |
| C | -2.284104 | -0.834776 | 0.131329  |
| H | -3.252492 | -1.159779 | -0.250813 |
| H | -2.419719 | -0.591141 | 1.189449  |
| H | 0.502876  | 1.966680  | 1.526046  |
| H | -1.269557 | 2.359070  | 1.247011  |
| H | 0.852088  | -2.287826 | 0.371326  |
| H | -2.521983 | 1.240372  | -0.483915 |
| H | -1.757017 | 0.199316  | -1.685644 |
| H | 0.067694  | -1.251372 | 1.554220  |
| O | -0.081325 | 2.169607  | -0.508032 |
| C | 1.998282  | 0.209813  | 0.217032  |
| H | 2.183232  | 1.228959  | -0.127015 |
| H | 2.014097  | 0.234576  | 1.309769  |
| C | 3.115715  | -0.698621 | -0.287786 |
| H | 4.088904  | -0.344654 | 0.053444  |
| H | 2.996501  | -1.723348 | 0.065170  |
| H | 3.132396  | -0.720460 | -1.378996 |

eq2

```
=====
```

|   |           |           |           |
|---|-----------|-----------|-----------|
| C | -0.011629 | 0.753581  | -0.073756 |
| C | 0.336972  | -0.713724 | -0.266198 |
| H | 0.316162  | -0.896067 | -1.348345 |

|   |           |           |           |
|---|-----------|-----------|-----------|
| C | 0.603415  | 1.563678  | 0.985638  |
| C | -0.774801 | -1.560500 | 0.377466  |
| C | -2.171514 | -1.205093 | -0.125262 |
| H | -2.916893 | -1.822962 | 0.377931  |
| H | -2.238613 | -1.427492 | -1.194569 |
| C | -1.390582 | 1.132676  | -0.563460 |
| C | -2.466972 | 0.275280  | 0.098597  |
| H | -3.449345 | 0.538362  | -0.295281 |
| H | -2.482705 | 0.482749  | 1.172867  |
| H | 1.370135  | 1.140458  | 1.623364  |
| H | 0.045103  | 2.392872  | 1.405272  |
| H | -0.562997 | -2.615317 | 0.193826  |
| H | -1.554201 | 2.194116  | -0.374519 |
| H | -1.421666 | 0.980804  | -1.647213 |
| H | -0.734896 | -1.412003 | 1.462313  |
| O | 0.987490  | 1.726367  | -0.382279 |
| C | 1.697401  | -1.172330 | 0.267735  |
| H | 1.730607  | -1.019275 | 1.349559  |
| H | 1.735724  | -2.254489 | 0.120264  |
| C | 2.930949  | -0.553827 | -0.386086 |
| H | 3.829209  | -1.091992 | -0.080117 |
| H | 2.862432  | -0.612751 | -1.474192 |
| H | 3.052589  | 0.493601  | -0.120966 |

eq3

```
=====
```

|   |           |           |           |
|---|-----------|-----------|-----------|
| C | -0.190444 | 0.886156  | -0.129997 |
| C | 0.422878  | -0.395773 | -0.673053 |
| H | 0.126011  | -0.420014 | -1.728381 |
| C | 0.512782  | 1.761243  | 0.818297  |
| C | -0.225798 | -1.609611 | 0.007550  |
| C | -1.749041 | -1.588302 | -0.092448 |
| H | -2.167999 | -2.461120 | 0.410700  |
| H | -2.048487 | -1.647268 | -1.143281 |
| C | -1.701345 | 0.916710  | -0.171864 |
| C | -2.306057 | -0.304465 | 0.518195  |
| H | -3.393198 | -0.276146 | 0.436102  |
| H | -2.061989 | -0.277113 | 1.584530  |
| H | 1.515406  | 1.524557  | 1.149047  |
| H | -0.070461 | 2.383374  | 1.487907  |
| H | 0.176829  | -2.523069 | -0.436034 |
| H | -2.054922 | 1.845433  | 0.277136  |
| H | -2.006203 | 0.922062  | -1.223341 |
| H | 0.053133  | -1.620378 | 1.064837  |
| O | 0.412508  | 2.106569  | -0.565042 |
| C | 1.958787  | -0.439573 | -0.626537 |
| H | 2.301560  | -1.073851 | -1.446505 |
| H | 2.341124  | 0.561071  | -0.837415 |
| C | 2.573056  | -0.969682 | 0.670078  |
| H | 3.654494  | -0.829415 | 0.657198  |
| H | 2.183367  | -0.464869 | 1.554300  |
| H | 2.382364  | -2.036034 | 0.792217  |

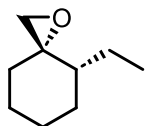

(3S,4R)-4-ethyl-1-oxaspiro[2.5]octane

| Conformation | Electronic Energy | Enthalpy    | Gibbs Free Energy |
|--------------|-------------------|-------------|-------------------|
| ax1          | -427.741110       | -427.492322 | -427.537947       |
| ax2          | -427.735097       | -427.486073 | -427.531085       |
| ax3          | -427.740658       | -427.491924 | -427.537044       |
| eq1          | -427.740491       | -427.491688 | -427.536939       |
| eq2          | -427.740098       | -427.491317 | -427.536115       |
| eq3          | -427.738616       | -427.489819 | -427.534877       |

ax1

|   |           |           |           |
|---|-----------|-----------|-----------|
| C | 0.859979  | -0.607074 | -0.020570 |
| C | -0.559783 | -0.406166 | 0.470496  |
| H | -0.747051 | -1.148469 | 1.251823  |
| C | 1.818651  | -1.328294 | 0.822896  |
| C | -0.656584 | 0.997282  | 1.090396  |
| C | -0.192719 | 2.090278  | 0.125087  |
| H | -0.253130 | 3.063063  | 0.615290  |
| H | -0.859313 | 2.131512  | -0.740533 |
| C | 1.369076  | 0.441781  | -0.979339 |
| C | 1.238803  | 1.830507  | -0.347034 |
| H | 1.553118  | 2.594347  | -1.059109 |
| H | 1.913797  | 1.893176  | 0.512062  |
| H | 1.495229  | -1.725081 | 1.778299  |
| H | 2.877712  | -1.117872 | 0.726849  |
| H | -1.675357 | 1.189282  | 1.428299  |
| H | 2.405584  | 0.221498  | -1.236765 |
| H | 0.784741  | 0.400890  | -1.902402 |
| H | -0.019227 | 1.024081  | 1.979456  |
| O | 1.224095  | -1.954685 | -0.319805 |
| C | -1.571161 | -0.658889 | -0.655063 |
| H | -1.361125 | -1.644230 | -1.077621 |
| H | -1.429019 | 0.061192  | -1.462827 |
| C | -3.021257 | -0.610096 | -0.183931 |
| H | -3.310395 | 0.393513  | 0.128840  |
| H | -3.699215 | -0.912555 | -0.982465 |
| H | -3.179137 | -1.282839 | 0.661618  |

ax2

|   |           |           |           |
|---|-----------|-----------|-----------|
| C | 0.977199  | -0.253411 | -0.053344 |
| C | -0.227253 | -0.616409 | 0.799382  |

|   |           |           |           |
|---|-----------|-----------|-----------|
| H | 0.174918  | -1.142137 | 1.668424  |
| C | 2.319490  | -0.390292 | 0.528419  |
| C | -0.901604 | 0.669111  | 1.313918  |
| C | -1.088660 | 1.761855  | 0.254587  |
| H | -1.462098 | 2.665369  | 0.739842  |
| H | -1.839706 | 1.464162  | -0.477600 |
| C | 0.776987  | 0.793857  | -1.120693 |
| C | 0.217532  | 2.063962  | -0.478094 |
| H | 0.060103  | 2.831306  | -1.236779 |
| H | 0.952598  | 2.456749  | 0.231476  |
| H | 2.428231  | -0.756372 | 1.542583  |
| H | 3.127029  | 0.229296  | 0.155189  |
| H | -1.861045 | 0.414601  | 1.770305  |
| H | 1.729992  | 0.986635  | -1.614775 |
| H | 0.082455  | 0.425289  | -1.878590 |
| H | -0.274942 | 1.081702  | 2.110001  |
| O | 1.818166  | -1.351572 | -0.406119 |
| C | -1.178270 | -1.628610 | 0.130565  |
| H | -1.720767 | -2.129774 | 0.935947  |
| H | -0.563051 | -2.397283 | -0.342922 |
| C | -2.213387 | -1.118833 | -0.870422 |
| H | -1.763639 | -0.613635 | -1.723758 |
| H | -2.791290 | -1.960637 | -1.254954 |
| H | -2.916318 | -0.430081 | -0.401350 |

ax3

```
=====
```

|   |           |           |           |
|---|-----------|-----------|-----------|
| C | 0.150227  | 0.820118  | 0.042048  |
| C | 0.389701  | -0.504317 | 0.738796  |
| H | 0.978302  | -0.299491 | 1.637493  |
| C | 0.175028  | 2.056373  | 0.831739  |
| C | -0.982968 | -1.061781 | 1.154354  |
| C | -1.956893 | -1.159091 | -0.024710 |
| H | -2.928160 | -1.504285 | 0.333055  |
| H | -1.603692 | -1.905803 | -0.739674 |
| C | -0.753824 | 0.751867  | -1.163335 |
| C | -2.112505 | 0.186913  | -0.735351 |
| H | -2.766881 | 0.086499  | -1.601985 |
| H | -2.587413 | 0.898915  | -0.053400 |
| H | 0.408908  | 2.009720  | 1.889277  |
| H | -0.419013 | 2.904688  | 0.511257  |
| H | -0.852502 | -2.040698 | 1.619858  |
| H | -0.860545 | 1.748275  | -1.593186 |
| H | -0.304329 | 0.108367  | -1.924758 |
| H | -1.414508 | -0.400163 | 1.911200  |
| O | 1.258683  | 1.717237  | -0.038731 |
| C | 1.173928  | -1.507344 | -0.116337 |
| H | 0.586922  | -1.796818 | -0.989603 |
| H | 1.303368  | -2.414831 | 0.478882  |
| C | 2.537889  | -1.001685 | -0.575764 |
| H | 3.138971  | -0.669010 | 0.272237  |
| H | 3.087611  | -1.790890 | -1.090014 |
| H | 2.439997  | -0.158683 | -1.259431 |

eq1

```
=====
C  -0.501602    0.845013   -0.228323
C   0.626839   -0.163503   -0.395350
H   0.641982   -0.437125   -1.457155
C  -0.278878    2.293553   -0.176968
C   0.262788   -1.424740    0.402546
C  -1.104567   -1.982953    0.006049
H  -1.334971   -2.863958    0.607252
H  -1.065190   -2.310179   -1.037827
C  -1.860718    0.324819   -0.635775
C  -2.203448   -0.934342    0.160169
H  -3.165023   -1.333678   -0.164972
H  -2.304538   -0.668757    1.216239
H  -1.087444    2.953131   -0.471725
H   0.717811    2.705228   -0.265194
H   1.024478   -2.189341    0.251667
H  -2.606164    1.104683   -0.476096
H  -1.842024    0.093002   -1.704420
H   0.264592   -1.175226    1.469371
O  -0.517646    1.550343    1.021036
C   2.002526    0.397460   -0.028858
H   2.238210    1.218797   -0.707332
H   1.958358    0.820467    0.977818
C   3.128875   -0.629983   -0.106445
H   4.097643   -0.143335    0.008950
H   3.046710   -1.385836    0.673877
H   3.125853   -1.142562   -1.071017
```

eq2

```
=====
C  -0.058155    0.785695   -0.155008
C   0.451524   -0.648725   -0.171209
H   0.471213   -0.957636   -1.222788
C   0.816015    1.950220    0.018265
C  -0.589319   -1.521062    0.545125
C  -1.975178   -1.390051   -0.086924
H  -2.694975   -2.005128    0.455543
H  -1.934831   -1.773363   -1.111440
C  -1.409824    0.957161   -0.808978
C  -2.440723    0.065175   -0.114381
H  -3.406257    0.149319   -0.614781
H  -2.577290    0.419336    0.911120
H   0.491822    2.908486   -0.372212
H   1.885287    1.825977    0.131270
H  -0.261081   -2.561674    0.521568
H  -1.705686    2.005647   -0.759452
H  -1.329356    0.680460   -1.863751
H  -0.632245   -1.221446    1.597538
O   0.041123    1.453265    1.111083
C   1.857962   -0.821416    0.407802
H   1.986438   -0.140269    1.252347
H   1.945319   -1.830600    0.815561
C   2.963325   -0.614479   -0.625217
```

```

H   3.950863   -0.652229   -0.164071
H   2.920662   -1.393672   -1.388220
H   2.867371    0.345557   -1.133749

```

eq3

```

=====
C  -0.114791    0.847124   -0.277264
C   0.370025   -0.538308   -0.672317
H   0.014284   -0.680486   -1.699158
C   0.758351    2.023853   -0.253929
C  -0.364063   -1.566516    0.199989
C  -1.880905   -1.437479    0.053010
H  -2.384182   -2.166442    0.690238
H  -2.161177   -1.666580   -0.979888
C  -1.608356    1.023471   -0.433464
C  -2.349382   -0.024328    0.400493
H  -3.425495    0.070628    0.249662
H  -2.154441    0.167835    1.459316
H   0.322265    3.005981   -0.398378
H   1.806165    1.931523   -0.513768
H  -0.037717   -2.572719   -0.072460
H  -1.885640    2.032525   -0.126227
H  -1.869790    0.909980   -1.489026
H  -0.090194   -1.411026    1.247178
O   0.383702    1.371642    0.961740
C   1.887109   -0.756324   -0.709744
H   2.049579   -1.743849   -1.149292
H   2.333095   -0.042525   -1.405466
C   2.626728   -0.695646    0.625944
H   3.677588   -0.949369    0.480079
H   2.573360    0.293926    1.075064
H   2.214389   -1.407622    1.341902

```

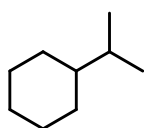

isopropylcyclohexane

| Conformation | Electronic Energy | Enthalpy    | Gibbs Free Energy |
|--------------|-------------------|-------------|-------------------|
| ax1          | -353.751841       | -353.485079 | -353.530377       |
| ax2          | -353.746356       | -353.479609 | -353.524012       |
| ax3          | -353.745953       | -353.479126 | -353.523641       |
| eq1          | -353.753876       | -353.487483 | -353.532677       |
| eq2          | -353.753891       | -353.487539 | -353.533057       |

ax1

```

=====
C   0.580867    1.243608    0.780168

```

|   |           |           |           |
|---|-----------|-----------|-----------|
| C | -0.323017 | -0.000151 | 0.791964  |
| H | -0.885846 | -0.000308 | 1.732498  |
| C | 0.580836  | -1.243932 | 0.779725  |
| C | 1.515048  | -1.265654 | -0.432212 |
| H | 2.155267  | -2.148934 | -0.391366 |
| H | 0.928552  | -1.346645 | -1.351826 |
| C | 1.514977  | 1.265757  | -0.431830 |
| C | 2.373143  | 0.000083  | -0.483750 |
| H | 2.997365  | 0.000230  | -1.379316 |
| H | 3.050391  | -0.000021 | 0.376689  |
| H | 1.192426  | -1.227142 | 1.687329  |
| H | 0.928393  | 1.346951  | -1.351374 |
| H | 2.155143  | 2.149066  | -0.390792 |
| H | -0.010929 | -2.158241 | 0.822923  |
| H | -0.010867 | 2.157912  | 0.823797  |
| H | 1.192533  | 1.226423  | 1.687713  |
| C | -1.375436 | 0.000003  | -0.338286 |
| H | -0.861997 | -0.000122 | -1.302890 |
| C | -2.256675 | 1.248783  | -0.280756 |
| H | -1.696897 | 2.160900  | -0.485028 |
| H | -3.059558 | 1.184297  | -1.016799 |
| H | -2.716264 | 1.348997  | 0.706669  |
| C | -2.257022 | -1.248523 | -0.280621 |
| H | -2.716979 | -1.348244 | 0.706681  |
| H | -3.059637 | -1.184091 | -1.016962 |
| H | -1.697426 | -2.160870 | -0.484367 |

ax2

```
=====
```

|   |           |           |           |
|---|-----------|-----------|-----------|
| C | 0.242702  | -1.044122 | -0.937429 |
| C | -0.371987 | 0.360823  | -0.781544 |
| H | -0.806228 | 0.614624  | -1.753022 |
| C | 0.728089  | 1.411211  | -0.538560 |
| C | 1.770968  | 1.031406  | 0.513527  |
| H | 2.541894  | 1.803731  | 0.551922  |
| H | 1.320137  | 0.990504  | 1.507337  |
| C | 1.317034  | -1.401203 | 0.096854  |
| C | 2.394480  | -0.322593 | 0.183533  |
| H | 3.141832  | -0.593737 | 0.931427  |
| H | 2.914257  | -0.250873 | -0.777842 |
| H | 1.260484  | 1.559492  | -1.483920 |
| H | 0.872252  | -1.532319 | 1.084064  |
| H | 1.765419  | -2.359335 | -0.174216 |
| H | 0.264941  | 2.368942  | -0.289883 |
| H | -0.546236 | -1.799855 | -0.931982 |
| H | 0.709375  | -1.095866 | -1.925996 |
| C | -1.567327 | 0.445484  | 0.199496  |
| H | -1.739932 | 1.511156  | 0.380581  |
| C | -1.380403 | -0.231467 | 1.558480  |
| H | -0.503272 | 0.125873  | 2.094572  |
| H | -2.253620 | -0.040996 | 2.185436  |
| H | -1.291946 | -1.313733 | 1.443890  |
| C | -2.830974 | -0.115819 | -0.457071 |
| H | -2.710367 | -1.176056 | -0.691764 |

|   |           |           |           |
|---|-----------|-----------|-----------|
| H | -3.689796 | -0.023255 | 0.210039  |
| H | -3.064690 | 0.409374  | -1.384366 |

ax3

```
=====
```

|   |           |           |           |
|---|-----------|-----------|-----------|
| C | -0.269078 | 1.394858  | -0.416262 |
| C | 0.353971  | 0.079470  | -0.920969 |
| H | 0.728533  | 0.301995  | -1.925040 |
| C | -0.733130 | -0.997609 | -1.096019 |
| C | -1.729867 | -1.114232 | 0.063575  |
| H | -2.516502 | -1.819109 | -0.213502 |
| H | -1.244415 | -1.520514 | 0.951695  |
| C | -1.237996 | 1.245151  | 0.757976  |
| C | -2.337103 | 0.240854  | 0.419379  |
| H | -3.032698 | 0.135976  | 1.253951  |
| H | -2.912865 | 0.616711  | -0.433077 |
| H | -1.306781 | -0.752142 | -1.995262 |
| H | -0.709742 | 0.914714  | 1.654966  |
| H | -1.674319 | 2.218558  | 0.991365  |
| H | -0.260563 | -1.965490 | -1.284756 |
| H | 0.511892  | 2.117484  | -0.177306 |
| H | -0.835550 | 1.824339  | -1.249199 |
| C | 1.613875  | -0.424182 | -0.174196 |
| H | 2.034560  | -1.193355 | -0.830700 |
| C | 1.395436  | -1.092943 | 1.183907  |
| H | 0.781425  | -1.988815 | 1.103893  |
| H | 2.359619  | -1.394761 | 1.598862  |
| H | 0.927572  | -0.418316 | 1.901556  |
| C | 2.665978  | 0.677253  | -0.041001 |
| H | 2.387687  | 1.399527  | 0.729024  |
| H | 3.629165  | 0.251153  | 0.243959  |
| H | 2.800463  | 1.220330  | -0.978774 |

eq1

```
=====
```

|   |           |           |           |
|---|-----------|-----------|-----------|
| C | -0.597653 | -1.313286 | -0.200257 |
| C | 0.273380  | -0.074618 | -0.435177 |
| H | 0.142766  | 0.211808  | -1.486778 |
| C | -0.245692 | 1.088159  | 0.418042  |
| C | -1.716514 | 1.384993  | 0.119255  |
| H | -2.069284 | 2.205348  | 0.747126  |
| H | -1.811924 | 1.715453  | -0.919989 |
| C | -2.070851 | -1.030924 | -0.497770 |
| C | -2.584103 | 0.145219  | 0.332091  |
| H | -3.624303 | 0.361696  | 0.081845  |
| H | -2.560687 | -0.128442 | 1.391911  |
| H | -0.148383 | 0.828337  | 1.476940  |
| H | -2.182706 | -0.794779 | -1.560787 |
| H | -2.672145 | -1.921348 | -0.304904 |
| H | 0.355797  | 1.983977  | 0.252102  |
| H | -0.238382 | -2.138680 | -0.820032 |
| H | -0.503634 | -1.632011 | 0.842575  |
| C | 1.773954  | -0.369186 | -0.246310 |
| H | 1.982373  | -1.276364 | -0.823011 |



|   |          |           |           |
|---|----------|-----------|-----------|
| C | 2.165905 | -0.642580 | 1.206435  |
| H | 1.555241 | -1.424369 | 1.659199  |
| H | 3.207882 | -0.962069 | 1.261875  |
| H | 2.067392 | 0.258674  | 1.814512  |
| C | 2.647301 | 0.747623  | -0.817622 |
| H | 2.528651 | 1.672418  | -0.249883 |
| H | 3.702459 | 0.471842  | -0.775985 |
| H | 2.394520 | 0.956105  | -1.858840 |

eq2

```
=====
C -0.172861 -0.496947 1.254495
C 0.169417 0.317932 0.000000
H 1.253990 0.495752 0.000000
C -0.172861 -0.496947 -1.254495
C 0.471701 -1.883365 -1.251800
H 0.179221 -2.430193 -2.150223
H 1.560153 -1.770729 -1.288849
C 0.471701 -1.883365 1.251800
C 0.097281 -2.671310 -0.000000
H 0.589629 -3.645534 0.000000
H -0.981804 -2.856691 -0.000000
H -1.262718 -0.606297 -1.310392
H 1.560153 -1.770729 1.288849
H 0.179221 -2.430193 2.150223
H 0.138101 0.039275 -2.150918
H 0.138101 0.039275 2.150918
H -1.262718 -0.606297 1.310392
C -0.521248 1.695610 -0.000000
H -1.602945 1.517758 -0.000000
C -0.172861 2.512529 -1.245908
H -0.544925 2.057139 -2.162253
H -0.602833 3.512974 -1.178031
H 0.911348 2.622197 -1.338894
C -0.172861 2.512529 1.245908
H 0.911348 2.622197 1.338894
H -0.602833 3.512974 1.178031
H -0.544925 2.057139 2.162253
```

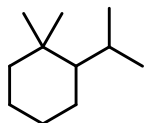

2-isopropyl-1,1-dimethylcyclohexane

Conformation | Electronic Energy | Enthalpy | Gibbs Free Energy

---

|     |  |             |  |             |  |             |
|-----|--|-------------|--|-------------|--|-------------|
| ax  |  | -432.358974 |  | -432.033188 |  | -432.082588 |
| ax2 |  | -432.359441 |  | -432.033622 |  | -432.082266 |
| ax3 |  | -432.355163 |  | -432.029275 |  | -432.078373 |
| ax4 |  | -432.353716 |  | -432.027669 |  | -432.076694 |
| eq  |  | -432.364381 |  | -432.039005 |  | -432.088432 |
| eq2 |  | -432.359349 |  | -432.033926 |  | -432.084257 |
| eq3 |  | -432.359111 |  | -432.033535 |  | -432.083149 |

ax

```
=====
```

|   |           |           |           |
|---|-----------|-----------|-----------|
| C | 0.894554  | -0.859192 | -0.034206 |
| C | -0.398931 | -0.227572 | -0.645962 |
| H | -0.559171 | -0.781561 | -1.577848 |
| C | -0.163527 | 1.241785  | -1.060128 |
| C | 0.543701  | 2.111100  | -0.016284 |
| H | 0.725794  | 3.100836  | -0.440293 |
| H | -0.091864 | 2.255705  | 0.858629  |
| C | 1.597028  | 0.072438  | 0.973076  |
| C | 1.855333  | 1.474849  | 0.430824  |
| H | 2.548850  | 1.430773  | -0.413282 |
| H | 2.332530  | 2.086859  | 1.198520  |
| H | 0.448422  | 1.252928  | -1.965746 |
| H | 2.537985  | -0.398489 | 1.271478  |
| H | 0.992012  | 0.154486  | 1.878870  |
| H | -1.113828 | 1.699612  | -1.338696 |
| C | -1.719649 | -0.456071 | 0.132372  |
| H | -1.757788 | -1.520774 | 0.368284  |
| C | 1.864113  | -1.158755 | -1.189931 |
| H | 2.818316  | -1.523271 | -0.802850 |
| H | 1.448633  | -1.930139 | -1.841534 |
| H | 2.066836  | -0.281118 | -1.803031 |
| C | 0.605334  | -2.188081 | 0.667550  |
| H | 0.076992  | -2.880270 | 0.007887  |
| H | 1.545530  | -2.659857 | 0.962228  |
| H | 0.006044  | -2.051290 | 1.568951  |
| C | -2.933157 | -0.175975 | -0.759630 |
| H | -3.849105 | -0.502846 | -0.264117 |
| H | -3.042537 | 0.888799  | -0.971741 |
| H | -2.859180 | -0.704528 | -1.711776 |
| C | -1.884815 | 0.307877  | 1.446477  |
| H | -2.802083 | -0.014071 | 1.944111  |
| H | -1.059355 | 0.142824  | 2.137111  |
| H | -1.972927 | 1.380969  | 1.269900  |

ax2

```
=====
```

|   |           |           |           |
|---|-----------|-----------|-----------|
| C | 0.778777  | 0.920244  | 0.042673  |
| C | -0.387316 | 0.051199  | 0.621558  |
| H | -0.721098 | 0.546044  | 1.541557  |
| C | 0.161833  | -1.329779 | 1.032445  |
| C | 0.868059  | -2.060050 | -0.110647 |
| H | 1.228844  | -3.030749 | 0.235144  |
| H | 0.163056  | -2.254204 | -0.923800 |

|   |           |           |           |
|---|-----------|-----------|-----------|
| C | 1.515202  | 0.155836  | -1.075128 |
| C | 2.020456  | -1.222094 | -0.655895 |
| H | 2.794692  | -1.122086 | 0.109224  |
| H | 2.484428  | -1.720385 | -1.509244 |
| H | 0.873957  | -1.201111 | 1.849864  |
| H | 2.345660  | 0.774340  | -1.426389 |
| H | 0.835920  | 0.035495  | -1.925329 |
| H | -0.642596 | -1.944162 | 1.434783  |
| C | -1.639908 | -0.034787 | -0.303274 |
| H | -1.309961 | 0.031263  | -1.343999 |
| C | 1.763376  | 1.269886  | 1.169446  |
| H | 2.577795  | 1.882867  | 0.776638  |
| H | 1.257569  | 1.845899  | 1.947560  |
| H | 2.208279  | 0.395211  | 1.639420  |
| C | 0.306838  | 2.252395  | -0.547329 |
| H | -0.181824 | 2.873659  | 0.205168  |
| H | 1.172595  | 2.804762  | -0.919829 |
| H | -0.379830 | 2.114033  | -1.382713 |
| C | -2.616433 | 1.116469  | -0.028690 |
| H | -3.441294 | 1.098067  | -0.743596 |
| H | -3.043843 | 0.999932  | 0.970728  |
| H | -2.154982 | 2.098135  | -0.076371 |
| C | -2.446697 | -1.330500 | -0.159912 |
| H | -3.325340 | -1.283956 | -0.805744 |
| H | -1.885577 | -2.222649 | -0.430671 |
| H | -2.801572 | -1.453315 | 0.866122  |

ax3

```
=====
```

|   |           |           |           |
|---|-----------|-----------|-----------|
| C | 0.401967  | 1.013324  | -0.044239 |
| C | -0.333588 | -0.071226 | 0.800946  |
| H | -0.662340 | 0.443503  | 1.710382  |
| C | 0.669935  | -1.148361 | 1.273014  |
| C | 1.524952  | -1.759631 | 0.161241  |
| H | 2.251654  | -2.446050 | 0.600850  |
| H | 0.905305  | -2.355615 | -0.510280 |
| C | 1.261331  | 0.374545  | -1.153446 |
| C | 2.245504  | -0.675599 | -0.637804 |
| H | 2.997082  | -0.199309 | -0.002941 |
| H | 2.783475  | -1.119378 | -1.477649 |
| H | 1.343788  | -0.704847 | 2.009418  |
| H | 1.804472  | 1.172570  | -1.667966 |
| H | 0.608224  | -0.086518 | -1.896895 |
| H | 0.124138  | -1.934555 | 1.798509  |
| C | -1.641073 | -0.716521 | 0.248108  |
| H | -1.782458 | -1.601269 | 0.876391  |
| C | 1.312652  | 1.827783  | 0.891749  |
| H | 1.866721  | 2.573570  | 0.317177  |
| H | 0.712944  | 2.356511  | 1.635749  |
| H | 2.038131  | 1.215948  | 1.424028  |
| C | -0.558004 | 2.021066  | -0.682619 |
| H | -1.194019 | 2.490049  | 0.070797  |
| H | 0.017770  | 2.811546  | -1.170250 |
| H | -1.198986 | 1.568547  | -1.436831 |

|   |           |           |           |
|---|-----------|-----------|-----------|
| C | -1.654663 | -1.218803 | -1.200286 |
| H | -2.592442 | -1.748769 | -1.381369 |
| H | -1.604937 | -0.400089 | -1.917668 |
| H | -0.843282 | -1.908169 | -1.421351 |
| C | -2.885441 | 0.150807  | 0.480194  |
| H | -3.785722 | -0.451735 | 0.343446  |
| H | -2.906424 | 0.555447  | 1.493458  |
| H | -2.944522 | 0.984301  | -0.218149 |

ax4

```
=====
```

|   |           |           |           |
|---|-----------|-----------|-----------|
| C | 0.725022  | 0.886713  | 0.211605  |
| C | -0.396478 | -0.115379 | 0.627699  |
| H | -0.752308 | 0.234393  | 1.604132  |
| C | 0.225203  | -1.520409 | 0.821249  |
| C | 0.992832  | -2.006074 | -0.414894 |
| H | 1.462873  | -2.966491 | -0.194630 |
| H | 0.292181  | -2.188035 | -1.233717 |
| C | 1.428117  | 0.388120  | -1.060925 |
| C | 2.042469  | -1.000874 | -0.888693 |
| H | 2.863200  | -0.954729 | -0.169283 |
| H | 2.475943  | -1.335242 | -1.833145 |
| H | 0.893102  | -1.524234 | 1.682498  |
| H | 2.197356  | 1.109638  | -1.351122 |
| H | 0.697551  | 0.358789  | -1.876414 |
| H | -0.562943 | -2.238490 | 1.051034  |
| C | -1.668906 | -0.299221 | -0.258234 |
| H | -1.457748 | -1.098630 | -0.972153 |
| C | 1.739781  | 0.989026  | 1.367803  |
| H | 2.562368  | 1.645668  | 1.076626  |
| H | 1.259409  | 1.427739  | 2.245784  |
| H | 2.170594  | 0.037566  | 1.666403  |
| C | 0.232396  | 2.326051  | -0.003248 |
| H | -0.468783 | 2.623995  | 0.779613  |
| H | 1.085897  | 3.005986  | 0.043248  |
| H | -0.244230 | 2.478952  | -0.966228 |
| C | -2.184489 | 0.881032  | -1.082860 |
| H | -3.122123 | 0.588583  | -1.560547 |
| H | -2.391522 | 1.752876  | -0.461180 |
| H | -1.496139 | 1.173512  | -1.872839 |
| C | -2.819996 | -0.774927 | 0.637691  |
| H | -3.673647 | -1.093592 | 0.037389  |
| H | -2.534828 | -1.607066 | 1.280818  |
| H | -3.151912 | 0.044475  | 1.280565  |

eq

```
=====
```

|   |           |           |           |
|---|-----------|-----------|-----------|
| C | -0.663834 | 0.942710  | -0.037174 |
| C | 0.365405  | -0.166399 | -0.392583 |
| H | 0.307828  | -0.256032 | -1.484910 |
| C | -0.039755 | -1.535451 | 0.171757  |
| C | -1.436969 | -1.955779 | -0.275345 |
| H | -1.451751 | -2.071861 | -1.363876 |
| H | -1.694311 | -2.926014 | 0.153734  |

|   |           |           |           |
|---|-----------|-----------|-----------|
| C | -2.070973 | 0.459241  | -0.444333 |
| C | -2.461057 | -0.899828 | 0.129340  |
| H | -2.514484 | -0.846280 | 1.220438  |
| H | -3.457026 | -1.176257 | -0.221822 |
| H | 0.694748  | -2.283098 | -0.137434 |
| H | -2.104558 | 0.393839  | -1.537550 |
| H | -2.799263 | 1.220618  | -0.152256 |
| H | -0.015626 | -1.510112 | 1.264245  |
| C | 1.841042  | 0.181159  | -0.061107 |
| H | 1.946649  | 1.267237  | -0.082166 |
| C | -0.380161 | 2.213137  | -0.847043 |
| H | -1.185056 | 2.936926  | -0.698844 |
| H | 0.550470  | 2.697036  | -0.550743 |
| H | -0.323549 | 1.989267  | -1.914836 |
| C | -0.643105 | 1.308846  | 1.450840  |
| H | 0.304827  | 1.774917  | 1.724024  |
| H | -1.437675 | 2.027274  | 1.666215  |
| H | -0.791581 | 0.444105  | 2.097867  |
| C | 2.770907  | -0.387442 | -1.134763 |
| H | 3.816484  | -0.177270 | -0.901812 |
| H | 2.658502  | -1.472321 | -1.206204 |
| H | 2.549610  | 0.038091  | -2.114834 |
| C | 2.316478  | -0.295438 | 1.315282  |
| H | 3.308192  | 0.110451  | 1.522778  |
| H | 1.653345  | 0.014538  | 2.121699  |
| H | 2.396357  | -1.383596 | 1.347061  |

eq2

```
=====
```

|   |           |           |           |
|---|-----------|-----------|-----------|
| C | 0.506236  | -0.942792 | -0.016751 |
| C | -0.350007 | 0.337930  | -0.288881 |
| H | -0.439407 | 0.417980  | -1.381109 |
| C | 0.367506  | 1.610561  | 0.210287  |
| C | 1.807198  | 1.765163  | -0.265857 |
| H | 1.819923  | 1.877188  | -1.354974 |
| H | 2.237335  | 2.676778  | 0.153454  |
| C | 1.966814  | -0.696522 | -0.463809 |
| C | 2.627557  | 0.544277  | 0.116878  |
| H | 2.689797  | 0.468774  | 1.206185  |
| H | 3.650480  | 0.628328  | -0.255059 |
| H | -0.194178 | 2.485921  | -0.108298 |
| H | 1.976255  | -0.610067 | -1.556435 |
| H | 2.546275  | -1.589521 | -0.216696 |
| H | 0.352980  | 1.614886  | 1.305877  |
| C | -1.792621 | 0.340452  | 0.288007  |
| H | -1.706180 | 0.375453  | 1.379092  |
| C | 0.051678  | -2.152355 | -0.852347 |
| H | 0.838116  | -2.910872 | -0.840614 |
| H | -0.851812 | -2.625141 | -0.482123 |
| H | -0.113454 | -1.866030 | -1.893383 |
| C | 0.481863  | -1.325211 | 1.467342  |
| H | -0.517306 | -1.630211 | 1.781095  |
| H | 1.156194  | -2.165777 | 1.647601  |
| H | 0.796590  | -0.502828 | 2.110881  |

|   |           |           |           |
|---|-----------|-----------|-----------|
| C | -2.649018 | -0.877832 | -0.069906 |
| H | -3.686465 | -0.689624 | 0.210922  |
| H | -2.627466 | -1.074747 | -1.144378 |
| H | -2.336368 | -1.779668 | 0.449159  |
| C | -2.562620 | 1.593170  | -0.155896 |
| H | -3.602642 | 1.525559  | 0.165034  |
| H | -2.158846 | 2.515096  | 0.255758  |
| H | -2.557346 | 1.677470  | -1.246397 |

eq3

```
=====
```

|   |           |           |           |
|---|-----------|-----------|-----------|
| C | -0.336084 | 0.900902  | 0.020484  |
| C | 0.253235  | -0.485205 | -0.383659 |
| H | 0.140688  | -0.522452 | -1.475246 |
| C | -0.622255 | -1.625680 | 0.163857  |
| C | -2.068863 | -1.527741 | -0.320374 |
| H | -2.083910 | -1.685229 | -1.403706 |
| H | -2.671498 | -2.322096 | 0.124192  |
| C | -1.774130 | 0.954100  | -0.541841 |
| C | -2.674104 | -0.160530 | -0.014918 |
| H | -2.807182 | -0.049421 | 1.064355  |
| H | -3.666600 | -0.079361 | -0.462344 |
| H | -0.199907 | -2.579050 | -0.160415 |
| H | -1.723641 | 0.884845  | -1.633878 |
| H | -2.204410 | 1.930489  | -0.304512 |
| H | -0.596109 | -1.632524 | 1.257004  |
| C | 1.751493  | -0.795099 | -0.128829 |
| H | 1.823721  | -1.876813 | -0.278817 |
| C | 0.446864  | 2.053363  | -0.612480 |
| H | -0.095640 | 2.991409  | -0.469538 |
| H | 1.429575  | 2.170598  | -0.156536 |
| H | 0.581062  | 1.901804  | -1.685952 |
| C | -0.402291 | 1.153890  | 1.536917  |
| H | 0.571881  | 1.407664  | 1.947831  |
| H | -1.066169 | 2.001007  | 1.728082  |
| H | -0.789962 | 0.304521  | 2.096989  |
| C | 2.259635  | -0.521525 | 1.287347  |
| H | 3.222777  | -1.014048 | 1.434524  |
| H | 2.411789  | 0.545317  | 1.454663  |
| H | 1.574603  | -0.892509 | 2.050924  |
| C | 2.709185  | -0.178533 | -1.153456 |
| H | 3.692980  | -0.644472 | -1.065341 |
| H | 2.355734  | -0.339098 | -2.173607 |
| H | 2.844110  | 0.891768  | -1.006960 |

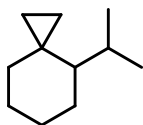

4-isopropylspiro[2.5]octane

| Conformation | Electronic Energy | Enthalpy    | Gibbs Free Energy |
|--------------|-------------------|-------------|-------------------|
| ax1          | -431.135937       | -430.833834 | -430.882108       |
| ax2          | -431.129155       | -430.826758 | -430.875195       |
| ax3          | -431.130469       | -430.827931 | -430.876119       |
| ax4          | -431.128861       | -430.826376 | -430.874106       |
| ax5          | -431.131158       | -430.828815 | -430.876873       |
| eq1          | -431.132384       | -430.829987 | -430.877761       |
| eq2          | -431.132331       | -430.830065 | -430.877599       |
| eq3          | -431.128671       | -430.826249 | -430.873922       |
| eq4          | -431.126874       | -430.824316 | -430.872913       |
| eq5          | -431.130702       | -430.828323 | -430.87625        |

ax1

| ===== |           |           |           |
|-------|-----------|-----------|-----------|
| C     | 0.797437  | 0.749262  | 0.053222  |
| C     | -0.415122 | 0.021484  | 0.623642  |
| H     | -0.745313 | 0.567112  | 1.515687  |
| C     | 0.891609  | 2.240686  | 0.146077  |
| C     | 1.744904  | 1.375472  | 1.039696  |
| C     | 0.057372  | -1.379184 | 1.053602  |
| C     | 0.680041  | -2.154996 | -0.111040 |
| H     | -0.078651 | -2.352921 | -0.873095 |
| H     | 1.029852  | -3.127659 | 0.239575  |
| C     | 1.430886  | 0.041736  | -1.128602 |
| C     | 1.843003  | -1.380239 | -0.736581 |
| H     | 2.231967  | -1.915158 | -1.604770 |
| H     | 2.656861  | -1.317785 | -0.007545 |
| C     | -1.619232 | -0.023546 | -0.343373 |
| H     | 0.070065  | 2.770621  | 0.607004  |
| H     | 1.378674  | 2.768009  | -0.663386 |
| H     | 2.804082  | 1.319284  | 0.827957  |
| H     | 1.484044  | 1.331793  | 2.088655  |
| H     | -0.758312 | -1.949568 | 1.497246  |
| H     | 0.724496  | 0.005659  | -1.963787 |
| H     | 2.300107  | 0.607035  | -1.471349 |
| H     | 0.813595  | -1.256450 | 1.834467  |
| H     | -1.329879 | -0.578989 | -1.238687 |
| C     | -2.050372 | 1.373741  | -0.789341 |
| H     | -2.299941 | 1.995207  | 0.074940  |
| H     | -1.271298 | 1.882854  | -1.354887 |
| H     | -2.937882 | 1.310856  | -1.421236 |
| C     | -2.810965 | -0.745968 | 0.287426  |
| H     | -3.683489 | -0.682468 | -0.364596 |

|   |           |           |          |
|---|-----------|-----------|----------|
| H | -2.610964 | -1.801826 | 0.465570 |
| H | -3.075385 | -0.286282 | 1.243866 |

ax2

```
=====
C  0.383412    0.917129   -0.058974
C -0.383201   -0.112969    0.769412
H -0.788127    0.427385    1.629583
C -0.241857    2.253323   -0.333071
C  0.869433    2.136784    0.680744
C  0.620306   -1.133478    1.335847
C  1.532070   -1.746499    0.273137
H  0.940642   -2.321805   -0.443784
H  2.224663   -2.447337    0.742975
C  1.358459    0.367041   -1.088476
C  2.308908   -0.652672   -0.459297
H  2.953714   -1.085743   -1.225948
H  2.959990   -0.142549    0.257815
C -1.616341   -0.781798    0.092708
H -1.235334    2.440943    0.046669
H -0.015187    2.731026   -1.276719
H  1.839212    2.532869    0.412753
H  0.604431    2.237935    1.724166
H  0.080721   -1.914227    1.875553
H  0.823463   -0.103649   -1.913474
H  1.924820    1.197990   -1.514922
H  1.252627   -0.620503    2.067751
H -1.729117   -1.761380    0.567437
C -1.530590   -1.014754   -1.416930
H -1.428214   -0.067968   -1.951338
H -0.700823   -1.658316   -1.702537
H -2.450869   -1.489623   -1.762643
C -2.896854    0.005857    0.387336
H -3.772157   -0.533024    0.019947
H -3.027050    0.170922    1.457873
H -2.879881    0.979276   -0.105782
```

ax3

```
=====
C  0.937642   -0.672034   -0.024087
C -0.380423   -0.272064   -0.684956
H -0.461457   -0.871423   -1.597581
C  1.214587   -2.132652    0.166653
C  1.951979   -1.359420   -0.900164
C -0.292201    1.193337   -1.153568
C  0.249423    2.171004   -0.108562
H -0.443165    2.258534    0.731338
H  0.330981    3.164701   -0.553419
C  1.512292    0.303099    0.990612
C  1.612327    1.710228    0.404223
H  1.995844    2.404058    1.154230
H  2.324630    1.706617   -0.427124
C -1.642684   -0.669843    0.122865
H  0.461662   -2.836320   -0.161215
```



|   |           |           |           |
|---|-----------|-----------|-----------|
| H | 1.769857  | -2.432779 | 1.044928  |
| H | 2.996711  | -1.139372 | -0.728075 |
| H | 1.687185  | -1.553417 | -1.930336 |
| H | -1.258651 | 1.531320  | -1.527833 |
| H | 0.889112  | 0.339980  | 1.885639  |
| H | 2.496123  | -0.052600 | 1.304391  |
| H | 0.392276  | 1.216796  | -2.007842 |
| H | -1.650656 | -1.763937 | 0.104953  |
| C | -2.920381 | -0.202266 | -0.574999 |
| H | -3.068787 | 0.872357  | -0.451490 |
| H | -2.896519 | -0.417719 | -1.645260 |
| H | -3.790631 | -0.703734 | -0.148830 |
| C | -1.683481 | -0.269169 | 1.598010  |
| H | -2.625020 | -0.605850 | 2.037396  |
| H | -0.876244 | -0.729775 | 2.165984  |
| H | -1.627726 | 0.811238  | 1.733987  |

ax4

```
=====
```

|   |           |           |           |
|---|-----------|-----------|-----------|
| C | 0.486853  | 0.898327  | -0.077109 |
| C | -0.377519 | 0.016235  | 0.821996  |
| H | -0.594036 | 0.624259  | 1.706642  |
| C | 0.162204  | 2.353497  | -0.238817 |
| C | 1.323898  | 1.939147  | 0.625688  |
| C | 0.471640  | -1.179439 | 1.300636  |
| C | 1.271016  | -1.892281 | 0.200115  |
| H | 0.606459  | -2.444957 | -0.463466 |
| H | 1.929094  | -2.629544 | 0.664656  |
| C | 1.206390  | 0.189900  | -1.209450 |
| C | 2.093889  | -0.916888 | -0.640630 |
| H | 2.603311  | -1.451708 | -1.444182 |
| H | 2.867924  | -0.459418 | -0.016832 |
| C | -1.782033 | -0.401152 | 0.308905  |
| H | -0.710754 | 2.742112  | 0.263428  |
| H | 0.380413  | 2.813123  | -1.193466 |
| H | 2.323368  | 2.114207  | 0.251564  |
| H | 1.210051  | 2.043561  | 1.696100  |
| H | -0.167708 | -1.897780 | 1.820494  |
| H | 0.491024  | -0.235026 | -1.917454 |
| H | 1.808513  | 0.914633  | -1.761866 |
| H | 1.187055  | -0.805587 | 2.039180  |
| H | -2.286409 | -0.787535 | 1.201288  |
| C | -1.845600 | -1.525346 | -0.727617 |
| H | -1.318982 | -1.271254 | -1.647655 |
| H | -1.437869 | -2.459119 | -0.344296 |
| H | -2.889346 | -1.711309 | -0.989288 |
| C | -2.602298 | 0.790014  | -0.184317 |
| H | -3.630617 | 0.480138  | -0.378057 |
| H | -2.627211 | 1.596015  | 0.550148  |
| H | -2.194922 | 1.193100  | -1.113322 |

ax5

```
=====
```

|   |          |           |          |
|---|----------|-----------|----------|
| C | 0.913400 | -0.733488 | 0.114155 |
|---|----------|-----------|----------|

|   |           |           |           |
|---|-----------|-----------|-----------|
| C | -0.398911 | -0.333524 | -0.556033 |
| H | -0.554934 | -1.068001 | -1.352011 |
| C | 1.104422  | -2.176004 | 0.467141  |
| C | 1.853053  | -1.581531 | -0.701821 |
| C | -0.235268 | 1.035794  | -1.244790 |
| C | 0.467827  | 2.104707  | -0.398013 |
| H | -0.171042 | 2.423052  | 0.426149  |
| H | 0.641817  | 2.987058  | -1.017224 |
| C | 1.576492  | 0.319364  | 0.979747  |
| C | 1.792071  | 1.598845  | 0.172693  |
| H | 2.254068  | 2.368606  | 0.793233  |
| H | 2.484954  | 1.387033  | -0.647892 |
| C | -1.652799 | -0.470062 | 0.344452  |
| H | 0.295819  | -2.859155 | 0.243708  |
| H | 1.668925  | -2.411993 | 1.358938  |
| H | 2.914757  | -1.412172 | -0.584020 |
| H | 1.542291  | -1.874715 | -1.695166 |
| H | -1.207813 | 1.404806  | -1.578563 |
| H | 0.961928  | 0.537291  | 1.856838  |
| H | 2.528876  | -0.067246 | 1.348891  |
| H | 0.363414  | 0.882598  | -2.147781 |
| H | -1.494689 | -1.362334 | 0.957374  |
| C | -2.889687 | -0.721992 | -0.521426 |
| H | -3.073900 | 0.120945  | -1.191912 |
| H | -2.770905 | -1.617722 | -1.132879 |
| H | -3.779101 | -0.849892 | 0.097889  |
| C | -1.945378 | 0.696644  | 1.289223  |
| H | -2.807266 | 0.452125  | 1.913037  |
| H | -1.113107 | 0.927856  | 1.951300  |
| H | -2.195432 | 1.599333  | 0.728112  |

eq1

|   |           |           |           |
|---|-----------|-----------|-----------|
| C | -0.692916 | 0.858967  | -0.194005 |
| C | 0.354848  | -0.234300 | -0.416886 |
| H | 0.304982  | -0.464654 | -1.488995 |
| C | -0.542873 | 1.879083  | 0.900860  |
| C | -0.417858 | 2.291425  | -0.546552 |
| C | -0.056032 | -1.515189 | 0.326289  |
| C | -1.462768 | -1.979802 | -0.041650 |
| H | -1.500347 | -2.228003 | -1.107208 |
| H | -1.711796 | -2.889445 | 0.507807  |
| C | -2.107673 | 0.393279  | -0.500386 |
| C | -2.478854 | -0.880090 | 0.253803  |
| H | -2.487700 | -0.677123 | 1.329410  |
| H | -3.485484 | -1.199311 | -0.021875 |
| C | 1.823044  | 0.160250  | -0.118290 |
| H | 0.364076  | 1.883854  | 1.486583  |
| H | -1.433353 | 2.177444  | 1.437498  |
| H | -1.235682 | 2.849422  | -0.981784 |
| H | 0.561394  | 2.574473  | -0.903569 |
| H | -0.024950 | -1.329950 | 1.403692  |
| H | -2.809746 | 1.197470  | -0.270941 |
| H | -2.184251 | 0.199521  | -1.576291 |

|   |          |           |           |
|---|----------|-----------|-----------|
| H | 0.669384 | -2.305282 | 0.118926  |
| H | 1.932372 | 1.232490  | -0.290197 |
| C | 2.764655 | -0.551529 | -1.091534 |
| H | 3.806886 | -0.310265 | -0.875108 |
| H | 2.651782 | -1.635655 | -1.012825 |
| H | 2.557109 | -0.265990 | -2.123740 |
| C | 2.280997 | -0.123694 | 1.316211  |
| H | 3.258675 | 0.330031  | 1.486617  |
| H | 1.595384 | 0.267280  | 2.067032  |
| H | 2.383842 | -1.196717 | 1.487814  |

eq2

```
=====
```

|   |           |           |           |
|---|-----------|-----------|-----------|
| C | -0.587515 | 0.864311  | -0.057788 |
| C | 0.357933  | -0.321738 | -0.277185 |
| H | 0.372074  | -0.516143 | -1.358309 |
| C | -0.633064 | 1.541779  | 1.284171  |
| C | -0.114900 | 2.282453  | 0.076339  |
| C | -0.295889 | -1.553334 | 0.368319  |
| C | -1.680572 | -1.820512 | -0.227733 |
| H | -1.559681 | -2.074940 | -1.285745 |
| H | -2.133569 | -2.688037 | 0.255812  |
| C | -1.944365 | 0.637477  | -0.699245 |
| C | -2.604513 | -0.609649 | -0.111509 |
| H | -2.827601 | -0.426171 | 0.943826  |
| H | -3.554935 | -0.809002 | -0.609850 |
| C | 1.823200  | -0.051132 | 0.136294  |
| H | 0.088672  | 1.254240  | 2.036189  |
| H | -1.606038 | 1.814151  | 1.670130  |
| H | -0.740553 | 3.055753  | -0.348445 |
| H | 0.943726  | 2.491896  | 0.050818  |
| H | -0.380118 | -1.395093 | 1.448846  |
| H | -2.578101 | 1.513300  | -0.545321 |
| H | -1.819542 | 0.511875  | -1.779888 |
| H | 0.327454  | -2.435111 | 0.221309  |
| H | 1.826453  | 0.635496  | 0.987061  |
| C | 2.582178  | 0.606842  | -1.020146 |
| H | 3.557474  | 0.972852  | -0.694593 |
| H | 2.748191  | -0.125887 | -1.814020 |
| H | 2.032921  | 1.441226  | -1.454798 |
| C | 2.585706  | -1.303361 | 0.570060  |
| H | 3.623832  | -1.046709 | 0.788457  |
| H | 2.159788  | -1.759192 | 1.463479  |
| H | 2.590357  | -2.053311 | -0.224415 |

eq3

```
=====
```

|   |           |           |           |
|---|-----------|-----------|-----------|
| C | -0.370481 | 0.824136  | -0.176779 |
| C | 0.235613  | -0.572701 | -0.341544 |
| H | 0.072423  | -0.834736 | -1.394998 |
| C | -0.208305 | 1.631879  | 1.083542  |
| C | 0.407147  | 2.106764  | -0.211072 |
| C | -0.630009 | -1.547280 | 0.473260  |
| C | -2.082076 | -1.536357 | -0.010140 |

|   |           |           |           |
|---|-----------|-----------|-----------|
| H | -2.110242 | -1.922280 | -1.034090 |
| H | -2.688662 | -2.209155 | 0.598970  |
| C | -1.783376 | 0.860969  | -0.739616 |
| C | -2.678566 | -0.128938 | 0.007561  |
| H | -2.781261 | 0.205255  | 1.044320  |
| H | -3.680352 | -0.137940 | -0.425808 |
| C | 1.744658  | -0.814454 | -0.114768 |
| H | 0.455203  | 1.283745  | 1.858788  |
| H | -1.086652 | 2.152547  | 1.441141  |
| H | -0.048762 | 2.953378  | -0.706836 |
| H | 1.482472  | 2.068728  | -0.281116 |
| H | -0.590980 | -1.270249 | 1.531589  |
| H | -2.186194 | 1.872583  | -0.656640 |
| H | -1.760155 | 0.606051  | -1.804124 |
| H | -0.223917 | -2.557853 | 0.389293  |
| H | 1.838284  | -1.904950 | -0.129115 |
| C | 2.316319  | -0.354577 | 1.227684  |
| H | 3.302327  | -0.798964 | 1.374681  |
| H | 2.442204  | 0.728003  | 1.267506  |
| H | 1.688195  | -0.658612 | 2.066054  |
| C | 2.609433  | -0.306669 | -1.270733 |
| H | 3.641894  | -0.637555 | -1.142004 |
| H | 2.251099  | -0.695114 | -2.225619 |
| H | 2.620937  | 0.780492  | -1.336362 |

eq4

```
=====
```

|   |           |           |           |
|---|-----------|-----------|-----------|
| C | -0.551838 | 0.870480  | -0.120504 |
| C | 0.342103  | -0.369443 | -0.301885 |
| H | 0.425836  | -0.544229 | -1.383545 |
| C | -0.346793 | 1.810719  | 1.035461  |
| C | -0.113612 | 2.286508  | -0.379179 |
| C | -0.371832 | -1.592244 | 0.316490  |
| C | -1.816930 | -1.788767 | -0.129942 |
| H | -1.840391 | -1.992713 | -1.205374 |
| H | -2.236399 | -2.664330 | 0.369095  |
| C | -2.002224 | 0.646238  | -0.532957 |
| C | -2.645131 | -0.546627 | 0.158435  |
| H | -2.679735 | -0.371380 | 1.238383  |
| H | -3.674070 | -0.672923 | -0.183017 |
| C | 1.787648  | -0.308807 | 0.260906  |
| H | 0.528663  | 1.670205  | 1.654401  |
| H | -1.219605 | 2.176368  | 1.559499  |
| H | -0.868049 | 2.931983  | -0.808240 |
| H | 0.888320  | 2.512909  | -0.694602 |
| H | -0.348694 | -1.481132 | 1.407154  |
| H | -2.567112 | 1.558436  | -0.332232 |
| H | -2.034548 | 0.484493  | -1.616588 |
| H | 0.184435  | -2.495972 | 0.079407  |
| H | 1.711785  | -0.216626 | 1.348718  |
| C | 2.647023  | 0.853008  | -0.252658 |

|   |          |           |           |
|---|----------|-----------|-----------|
| H | 3.698455 | 0.649728  | -0.045963 |
| H | 2.541556 | 0.977102  | -1.333008 |
| H | 2.409912 | 1.798434  | 0.228146  |
| C | 2.543135 | -1.612159 | -0.039876 |
| H | 3.585864 | -1.514377 | 0.262937  |
| H | 2.136665 | -2.475097 | 0.481791  |
| H | 2.527812 | -1.824319 | -1.112713 |

eq5

```
=====
C -0.672158    0.814872   -0.304395
C  0.352870   -0.317513   -0.393265
H  0.211470   -0.744276   -1.394805
C -0.689930    1.802882    0.829513
C -0.323068    2.248194   -0.567474
C -0.070973   -1.411298    0.598026
C -1.474538   -1.927752    0.265129
H -1.440256   -2.423997   -0.709946
H -1.780573   -2.681409    0.993088
C -2.050746    0.327091   -0.716390
C -2.505738   -0.799612    0.213480
H -2.641170   -0.390537    1.219271
H -3.474154   -1.188894   -0.106056
C  1.850930    0.051374   -0.349669
H  0.083479    1.777118    1.579910
H -1.664883    2.089736    1.200727
H -1.037707    2.853351   -1.108828
H  0.713019    2.499676   -0.745685
H -0.061978   -1.005008    1.613998
H -2.761639    1.155437   -0.686551
H -2.017806   -0.038037   -1.748036
H  0.632872   -2.244348    0.577745
H  2.009552    0.794709   -1.135213
C  2.706285   -1.166399   -0.714575
H  3.732785   -0.858224   -0.917682
H  2.739203   -1.889447    0.102150
H  2.323587   -1.675049   -1.601377
C  2.361637    0.644263    0.966227
H  3.453223    0.658989    0.962998
H  2.028399    1.668371    1.121997
H  2.045148    0.045230    1.822650
```

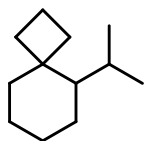

5-isopropylspiro[3.5]nonane

| Conformation | Electronic Energy | Enthalpy    | Gibbs Free Energy |
|--------------|-------------------|-------------|-------------------|
| ax1          | -470.434085       | -470.101355 | -470.15111        |
| ax2          | -470.438528       | -470.105912 | -470.155672       |
| ax3          | -470.432167       | -470.099403 | -470.149466       |
| ax4          | -470.431377       | -470.09849  | -470.148034       |
| ax5          | -470.434110       | -470.10137  | -470.15165        |
| ax6          | -470.433310       | -470.100437 | -470.149965       |
| eq1          | -470.433249       | -470.100587 | -470.150492       |
| eq2          | -470.435193       | -470.102497 | -470.152435       |
| eq3          | -470.432047       | -470.099302 | -470.149309       |
| eq4          | -470.437612       | -470.105006 | -470.15437        |
| eq5          | -470.432581       | -470.099794 | -470.148728       |
| eq6          | -470.433084       | -470.100299 | -470.149774       |

ax1

```
=====
```

|   |           |           |           |
|---|-----------|-----------|-----------|
| C | -0.477855 | -0.266448 | -0.717127 |
| H | -0.328421 | -0.815278 | -1.653922 |
| C | -0.894961 | 1.155187  | -1.132974 |
| C | -0.833933 | 2.183799  | -0.004326 |
| H | -1.104787 | 3.168403  | -0.390928 |
| H | -1.560356 | 1.940502  | 0.773933  |
| C | 0.999166  | 0.834891  | 1.071155  |
| C | 0.570152  | 2.222220  | 0.594311  |
| H | 0.617909  | 2.930649  | 1.423298  |
| H | 1.267968  | 2.580350  | -0.168671 |
| H | -0.200091 | 1.481826  | -1.914639 |
| H | 0.380160  | 0.547603  | 1.921585  |
| H | 2.029899  | 0.868407  | 1.434848  |
| H | -1.883610 | 1.143933  | -1.592095 |
| C | 0.900234  | -0.224538 | -0.036306 |
| C | 1.500815  | -1.582677 | 0.414025  |
| C | 2.112520  | -0.082510 | -1.007541 |
| C | 2.857353  | -1.163735 | -0.193764 |
| H | 1.061698  | -2.413016 | -0.140068 |
| H | 1.469966  | -1.808653 | 1.480426  |
| H | 1.862091  | -0.434577 | -2.008820 |
| H | 2.579997  | 0.899001  | -1.081569 |
| H | 3.404220  | -1.919085 | -0.754119 |
| H | 3.522860  | -0.728685 | 0.549426  |
| C | -1.547824 | -1.115545 | 0.021433  |
| H | -1.202432 | -2.148829 | -0.076613 |
| C | -2.901046 | -1.034269 | -0.686869 |
| H | -2.798186 | -1.154167 | -1.767279 |
| H | -3.567862 | -1.816969 | -0.321941 |
| H | -3.387772 | -0.074737 | -0.500078 |
| C | -1.742430 | -0.882136 | 1.521683  |
| H | -0.843297 | -1.114104 | 2.090516  |
| H | -2.037752 | 0.141936  | 1.749802  |
| H | -2.535355 | -1.539946 | 1.884707  |

ax2

```
=====
C  0.545871    -0.144611    0.622362
H  0.548838    -0.781001    1.516394
C  0.755748     1.314159    1.068186
C  0.702267     2.276602   -0.120223
H  0.838940     3.303191    0.224772
H  1.527366     2.065373   -0.805558
C -0.973911     0.700405   -1.207815
C -0.632558     2.153124   -0.859239
H -0.623510     2.760683   -1.766031
H -1.421249     2.558938   -0.219940
H -0.039918     1.580196    1.770277
H -0.304757     0.339553   -1.994632
H -1.987089     0.649166   -1.615118
H  1.693171     1.425831    1.611868
C -0.861996    -0.227362    0.006969
C -1.503107    -1.617828   -0.265183
C -2.024826     0.025738    1.013686
C -2.825368    -1.109102    0.342756
H -1.053649    -2.389090    0.359990
H -1.522218    -1.962079   -1.299338
H -1.723274    -0.245588    2.026763
H -2.472809     1.018451    1.031515
H -3.368082    -1.789861    0.995213
H -3.507276    -0.731846   -0.417186
C  1.694608    -0.650545   -0.280957
H  1.687775    -0.083690   -1.214338
C  1.551982    -2.130040   -0.643462
H  0.684431    -2.322791   -1.270807
H  2.434402    -2.467660   -1.189821
H  1.463686    -2.744028    0.256702
C  3.057328    -0.429733    0.380996
H  3.076095    -0.872788    1.380876
H  3.845656    -0.902048   -0.207017
H  3.307239     0.626245    0.476968
```

ax3

```
=====
C -0.556341    -0.038392    0.776799
H -0.575145     0.605412    1.661332
C -0.368626    -1.474889    1.291962
C -0.078758    -2.467047    0.167979
H  0.027615    -3.474294    0.575177
H -0.920365    -2.495445   -0.529537
C  1.107594    -0.626187   -1.092922
C  1.196504    -2.061034   -0.568986
H  1.400090    -2.743976   -1.395787
H  2.039145    -2.144926    0.123852
H  0.475128    -1.490775    1.990311
H  0.397244    -0.586727   -1.918029
H  2.074632    -0.325423   -1.505370
H -1.251999    -1.777483    1.857989
C  0.703466     0.378638   -0.004004
```

|   |           |           |           |
|---|-----------|-----------|-----------|
| C | 0.797191  | 1.841025  | -0.519298 |
| C | 1.936642  | 0.690051  | 0.899723  |
| C | 2.242591  | 1.920369  | 0.017882  |
| H | 0.136857  | 2.503300  | 0.039157  |
| H | 0.644894  | 2.000164  | -1.587165 |
| H | 1.627307  | 0.984186  | 1.903342  |
| H | 2.705852  | -0.078189 | 0.975251  |
| H | 2.532377  | 2.836457  | 0.528159  |
| H | 2.979984  | 1.699558  | -0.751518 |
| C | -1.946746 | 0.166161  | 0.098300  |
| H | -2.589180 | -0.633215 | 0.480725  |
| C | -2.005818 | 0.086218  | -1.429415 |
| H | -1.704070 | -0.885500 | -1.815212 |
| H | -3.031484 | 0.265467  | -1.758278 |
| H | -1.375292 | 0.847568  | -1.891697 |
| C | -2.584684 | 1.487757  | 0.540256  |
| H | -2.612592 | 1.571984  | 1.627572  |
| H | -2.030311 | 2.343129  | 0.150309  |
| H | -3.608786 | 1.562702  | 0.169764  |

ax4

```
=====
```

|   |           |           |           |
|---|-----------|-----------|-----------|
| C | 1.366093  | 0.025184  | 1.174790  |
| H | 1.942736  | 0.790372  | 1.700896  |
| C | 2.311058  | -0.944537 | 0.466154  |
| C | 1.528321  | -1.945544 | -0.381352 |
| H | 2.211869  | -2.619451 | -0.901149 |
| H | 0.900217  | -2.566104 | 0.264586  |
| C | -0.346831 | -0.245477 | -0.724687 |
| C | 0.661233  | -1.198698 | -1.392106 |
| H | 0.122544  | -1.899046 | -2.033450 |
| H | 1.322371  | -0.620952 | -2.044709 |
| H | 2.983719  | -0.380763 | -0.189022 |
| H | -0.759126 | 0.371153  | -1.529477 |
| H | 2.937443  | -1.459030 | 1.196999  |
| C | 0.415470  | 0.728453  | 0.205919  |
| C | -0.466594 | 1.846303  | 0.831891  |
| C | 1.090770  | 1.846377  | -0.650538 |
| C | -0.107632 | 2.770841  | -0.348848 |
| H | -0.016295 | 2.199852  | 1.761038  |
| H | -1.517831 | 1.638850  | 1.011310  |
| H | 2.003495  | 2.205857  | -0.173495 |
| H | 1.300178  | 1.620787  | -1.695549 |
| H | 0.106981  | 3.813436  | -0.123666 |
| H | -0.858382 | 2.728407  | -1.136847 |
| C | -1.569851 | -1.020070 | -0.138862 |
| H | 0.800844  | -0.513854 | 1.935718  |
| C | -1.573942 | -1.300887 | 1.366696  |
| H | -2.498762 | -1.817212 | 1.632027  |
| H | -0.746154 | -1.938209 | 1.672480  |
| H | -1.529648 | -0.383288 | 1.954409  |
| C | -2.885231 | -0.340147 | -0.535362 |
| H | -2.977405 | 0.650472  | -0.087216 |
| H | -2.953488 | -0.222168 | -1.617987 |



|   |           |           |           |
|---|-----------|-----------|-----------|
| H | -3.741075 | -0.933036 | -0.207215 |
| H | -1.571408 | -1.996857 | -0.631848 |

ax5

```

=====
C   0.970962    0.716304   -1.306943
H   1.901591    0.537022   -1.851062
C   0.940731    2.152754   -0.779982
C  -0.319379    2.418093    0.043700
H  -0.266720    3.409139    0.498670
H  -1.185661    2.431420   -0.621522
C  -0.472820   -0.080460    0.597196
C  -0.512386    1.365646    1.141934
H  -1.451847    1.549334    1.663408
H   0.276611    1.493108    1.885136
H   1.820929    2.314523   -0.150020
H  -0.472924   -0.769969    1.450972
H   1.009299    2.863171   -1.605709
C   0.864513   -0.275056   -0.150554
C   1.259271   -1.755839   -0.447769
C   2.089687   -0.223918    0.819874
C   2.171913   -1.760933    0.792957
H   1.827422   -1.824396   -1.376800
H   0.472709   -2.501755   -0.462035
H   2.950493    0.235907    0.332256
H   1.948199    0.244724    1.791867
H   3.160012   -2.203619    0.684976
H   1.679589   -2.210315    1.654153
C  -1.767280   -0.355175   -0.216775
H   0.150491    0.564050   -2.015398
C  -1.737729   -1.546837   -1.174883
H  -2.682936   -1.589210   -1.719898
H  -0.934578   -1.479796   -1.907550
H  -1.630749   -2.489572   -0.635051
C  -2.956651   -0.538960    0.731278
H  -2.820737   -1.442079    1.331771
H  -3.086516    0.300003    1.413543
H  -3.883924   -0.652517    0.167124
H  -1.965740    0.527103   -0.829029

```

ax6

```

=====
C  -0.886410    1.080259    1.133831
H  -1.874040    1.218741    1.581302
C  -0.432750    2.369770    0.453161
C   0.913032    2.164034   -0.236955
H   1.217828    3.076428   -0.753572
H   1.680672    1.952807    0.511248
C   0.339403   -0.321200   -0.641448
C   0.811921    1.017377   -1.241476
H   1.756295    0.882405   -1.767931
H   0.082743    1.313334   -2.002124
H  -1.174109    2.665001   -0.297144
H   0.067818   -0.942616   -1.502484

```

|   |           |           |           |
|---|-----------|-----------|-----------|
| H | -0.377016 | 3.180426  | 1.181795  |
| C | -0.966740 | -0.094730 | 0.157896  |
| C | -1.584050 | -1.402441 | 0.728120  |
| C | -2.182722 | -0.029008 | -0.817497 |
| C | -2.454127 | -1.523481 | -0.540786 |
| H | -2.193455 | -1.180898 | 1.605562  |
| H | -0.915627 | -2.227998 | 0.964600  |
| H | -2.975452 | 0.602655  | -0.414370 |
| H | -1.982496 | 0.264101  | -1.847672 |
| H | -3.490368 | -1.828762 | -0.411182 |
| H | -1.990097 | -2.163972 | -1.289224 |
| C | 1.426437  | -1.164507 | 0.081206  |
| H | -0.201944 | 0.852493  | 1.952213  |
| C | 2.730540  | -1.203457 | -0.717233 |
| H | 3.385051  | -1.986577 | -0.331436 |
| H | 2.549782  | -1.405561 | -1.774897 |
| H | 3.270797  | -0.257505 | -0.642997 |
| C | 1.729954  | -0.822920 | 1.541193  |
| H | 2.096708  | 0.196927  | 1.659683  |
| H | 0.855896  | -0.947248 | 2.179469  |
| H | 2.505556  | -1.495850 | 1.913584  |
| H | 1.038531  | -2.186512 | 0.085511  |

eq1

```
=====
```

|   |           |           |           |
|---|-----------|-----------|-----------|
| C | -0.400261 | -0.621925 | -0.273900 |
| H | -0.472601 | -0.899129 | -1.334989 |
| C | 0.260475  | -1.789205 | 0.489114  |
| C | 1.653760  | -2.150912 | -0.011035 |
| H | 2.051874  | -2.988425 | 0.564913  |
| H | 1.596850  | -2.476097 | -1.054728 |
| C | 1.950622  | 0.231166  | -0.661979 |
| C | 2.567257  | -0.937524 | 0.093593  |
| H | 3.561016  | -1.156595 | -0.301259 |
| H | 2.693428  | -0.672472 | 1.147901  |
| H | 0.335010  | -1.494862 | 1.542880  |
| H | 1.904465  | -0.019999 | -1.727933 |
| H | 2.584937  | 1.118157  | -0.577430 |
| H | -0.381619 | -2.668409 | 0.459621  |
| C | 0.531378  | 0.605872  | -0.205981 |
| C | 0.146775  | 1.919310  | -0.951222 |
| C | 0.558046  | 1.394512  | 1.135415  |
| C | 0.425164  | 2.719166  | 0.345876  |
| H | -0.877606 | 1.979478  | -1.297402 |
| H | 0.803415  | 2.151163  | -1.789986 |
| H | -0.303120 | 1.190150  | 1.770229  |
| H | 1.462762  | 1.278970  | 1.732144  |
| H | -0.371770 | 3.384665  | 0.672663  |
| H | 1.352454  | 3.287264  | 0.304617  |
| C | -1.848468 | -0.479380 | 0.274679  |
| H | -1.784671 | -0.607940 | 1.360225  |
| C | -2.731590 | -1.603956 | -0.280553 |
| H | -2.310665 | -2.595920 | -0.126838 |
| H | -3.715473 | -1.586009 | 0.190893  |

|   |           |           |           |
|---|-----------|-----------|-----------|
| H | -2.877042 | -1.464723 | -1.354787 |
| C | -2.588474 | 0.837411  | 0.030329  |
| H | -2.088383 | 1.700368  | 0.465726  |
| H | -2.731692 | 1.021550  | -1.036039 |
| H | -3.579675 | 0.771613  | 0.483560  |

eq2

```
=====
```

|   |           |           |           |
|---|-----------|-----------|-----------|
| C | 0.561433  | 0.419846  | -0.389458 |
| H | 0.533535  | 0.872723  | -1.390072 |
| C | 0.437046  | 1.582202  | 0.605452  |
| C | -0.750962 | 2.473461  | 0.234000  |
| H | -0.852550 | 3.291009  | 0.950308  |
| H | -0.550344 | 2.927765  | -0.741387 |
| C | -1.906344 | 0.434803  | -0.720932 |
| C | -2.052536 | 1.676692  | 0.160242  |
| H | -2.861360 | 2.307008  | -0.214165 |
| H | -2.338120 | 1.371030  | 1.170185  |
| H | 0.300819  | 1.188916  | 1.618468  |
| H | -1.761447 | 0.737208  | -1.763378 |
| H | -2.825123 | -0.157303 | -0.685195 |
| H | 1.346972  | 2.182530  | 0.616878  |
| C | -0.716208 | -0.435792 | -0.293076 |
| C | -0.752007 | -1.814739 | -1.002645 |
| C | -1.069796 | -1.157461 | 1.045841  |
| C | -1.462908 | -2.413134 | 0.232326  |
| H | 0.238100  | -2.245247 | -1.138891 |
| H | -1.286227 | -1.850431 | -1.952878 |
| H | -0.218133 | -1.323196 | 1.697562  |
| H | -1.865388 | -0.699369 | 1.631867  |
| H | -1.083272 | -3.366897 | 0.593442  |
| H | -2.539560 | -2.496018 | 0.096534  |
| C | 1.917120  | -0.320993 | -0.354054 |
| H | 1.915660  | -1.003980 | -1.206873 |
| C | 2.196927  | -1.154390 | 0.897263  |
| H | 1.565512  | -2.040304 | 0.952947  |
| H | 3.234744  | -1.493731 | 0.889696  |
| H | 2.048428  | -0.569686 | 1.807973  |
| C | 3.075576  | 0.654641  | -0.583282 |
| H | 3.281107  | 1.249293  | 0.308311  |
| H | 3.987063  | 0.106244  | -0.825711 |
| H | 2.865538  | 1.341614  | -1.405684 |

eq3

```
=====
```

|   |           |           |           |
|---|-----------|-----------|-----------|
| C | -0.271810 | -0.811871 | -0.265430 |
| H | -0.132780 | -1.171181 | -1.293575 |
| C | 0.589282  | -1.726975 | 0.619995  |
| C | 2.011383  | -1.840825 | 0.069223  |
| H | 2.621692  | -2.477334 | 0.712811  |
| H | 1.964340  | -2.328592 | -0.909476 |
| C | 1.758719  | 0.501962  | -0.846415 |
| C | 2.662446  | -0.467677 | -0.083507 |
| H | 3.624232  | -0.558490 | -0.591835 |

|   |           |           |           |
|---|-----------|-----------|-----------|
| H | 2.872134  | -0.061656 | 0.909349  |
| H | 0.616570  | -1.331302 | 1.641341  |
| H | 1.660767  | 0.172436  | -1.886075 |
| H | 2.217309  | 1.493902  | -0.869749 |
| H | 0.137329  | -2.719432 | 0.675581  |
| C | 0.351576  | 0.598440  | -0.232514 |
| C | -0.406148 | 1.814671  | -0.828778 |
| C | 0.444032  | 1.383722  | 1.114443  |
| C | 0.103777  | 2.680721  | 0.344147  |
| H | -1.484160 | 1.701376  | -0.775120 |
| H | -0.127779 | 2.111146  | -1.841156 |
| H | -0.330210 | 1.115366  | 1.825638  |
| H | 1.406661  | 1.356485  | 1.623183  |
| H | -0.620714 | 3.349136  | 0.804915  |
| H | 0.993141  | 3.252562  | 0.087333  |
| C | -1.783904 | -1.007681 | 0.012048  |
| H | -1.883779 | -2.080159 | 0.206605  |
| C | -2.662700 | -0.734329 | -1.212755 |
| H | -2.290415 | -1.269488 | -2.087993 |
| H | -3.682948 | -1.074518 | -1.023886 |
| H | -2.716143 | 0.323477  | -1.466474 |
| C | -2.349960 | -0.297087 | 1.241641  |
| H | -2.382238 | 0.785239  | 1.106358  |
| H | -3.372749 | -0.635072 | 1.419384  |
| H | -1.770409 | -0.512328 | 2.140247  |

eq4

```
=====
```

|   |           |           |           |
|---|-----------|-----------|-----------|
| C | -2.069531 | 0.163819  | -0.682038 |
| H | -2.042398 | -0.176570 | -1.723470 |
| C | -2.527146 | -0.982804 | 0.216353  |
| C | -1.522294 | -2.131449 | 0.179335  |
| H | -1.824217 | -2.924785 | 0.865744  |
| H | -1.509020 | -2.564937 | -0.825722 |
| C | 0.323603  | -0.489577 | -0.391285 |
| C | -0.120858 | -1.634120 | 0.529473  |
| H | 0.592998  | -2.458585 | 0.475572  |
| H | -0.117400 | -1.283821 | 1.566310  |
| H | -2.616330 | -0.617121 | 1.244797  |
| H | 0.216395  | -0.850282 | -1.422934 |
| H | -3.517823 | -1.328486 | -0.084277 |
| C | -0.684216 | 0.678680  | -0.292736 |
| C | -0.248018 | 1.970951  | -1.033532 |
| C | -0.660415 | 1.495967  | 1.032991  |
| C | 0.157140  | 2.596287  | 0.320713  |
| H | -1.111303 | 2.476860  | -1.467058 |
| H | 0.522503  | 1.875549  | -1.798211 |
| H | -1.664105 | 1.844354  | 1.281447  |
| H | -0.230486 | 1.030791  | 1.917373  |
| H | -0.144731 | 3.626611  | 0.498035  |
| H | 1.224795  | 2.505241  | 0.514302  |
| C | 1.828267  | -0.154232 | -0.232853 |

|   |           |           |           |
|---|-----------|-----------|-----------|
| H | -2.782606 | 0.990338  | -0.633828 |
| C | 2.330729  | -0.081292 | 1.211360  |
| H | 3.381948  | 0.212450  | 1.220108  |
| H | 1.783434  | 0.638592  | 1.816777  |
| H | 2.261182  | -1.055332 | 1.699384  |
| C | 2.674124  | -1.174093 | -1.001206 |
| H | 2.415808  | -1.183873 | -2.061177 |
| H | 3.736370  | -0.938902 | -0.914769 |
| H | 2.528034  | -2.183190 | -0.609675 |
| H | 2.008650  | 0.816271  | -0.698187 |

eq5

```
=====
```

|   |           |           |           |
|---|-----------|-----------|-----------|
| C | -1.805036 | 0.972797  | -0.607816 |
| H | -1.890741 | 0.805778  | -1.687941 |
| C | -2.775013 | 0.052866  | 0.124752  |
| C | -2.392262 | -1.404836 | -0.102799 |
| H | -3.046355 | -2.068641 | 0.465767  |
| H | -2.523419 | -1.652457 | -1.160921 |
| C | 0.039092  | -0.714133 | -0.464148 |
| C | -0.936964 | -1.631763 | 0.294298  |
| H | -0.657334 | -2.673943 | 0.122925  |
| H | -0.839194 | -1.453025 | 1.369363  |
| H | -2.738310 | 0.270902  | 1.197318  |
| H | -0.150708 | -0.865977 | -1.535630 |
| H | -3.798405 | 0.243012  | -0.203710 |
| C | -0.343942 | 0.760990  | -0.196821 |
| C | 0.585819  | 1.858192  | -0.788716 |
| C | -0.008077 | 1.308703  | 1.223756  |
| C | 1.151401  | 2.135396  | 0.621533  |
| H | -0.006914 | 2.697654  | -1.153582 |
| H | 1.284494  | 1.567694  | -1.567973 |
| H | -0.811053 | 1.944673  | 1.598474  |
| H | 0.245412  | 0.583324  | 1.993802  |
| H | 1.213425  | 3.178926  | 0.923964  |
| H | 2.122574  | 1.671369  | 0.780218  |
| C | 1.486941  | -1.234735 | -0.250432 |
| H | -2.067282 | 2.017921  | -0.426813 |
| C | 2.553788  | -0.618385 | -1.158615 |
| H | 3.437186  | -1.260022 | -1.167431 |
| H | 2.201219  | -0.523198 | -2.186981 |
| H | 2.873860  | 0.364106  | -0.813736 |
| C | 1.996277  | -1.269133 | 1.193840  |
| H | 1.280964  | -1.728769 | 1.875591  |
| H | 2.914572  | -1.858339 | 1.236591  |
| H | 2.234645  | -0.274949 | 1.569151  |
| H | 1.409227  | -2.281791 | -0.561442 |

eq6

```
=====
```

|   |           |           |           |
|---|-----------|-----------|-----------|
| C | -1.969595 | 0.571588  | -0.692774 |
| H | -1.929011 | 0.354150  | -1.766819 |
| C | -2.722254 | -0.542655 | 0.019483  |
| C | -1.958379 | -1.847923 | -0.138997 |

|   |           |           |           |
|---|-----------|-----------|-----------|
| H | -2.452973 | -2.658350 | 0.399941  |
| H | -1.946982 | -2.128821 | -1.197237 |
| C | 0.262957  | -0.566179 | -0.329112 |
| C | -0.521223 | -1.704774 | 0.353944  |
| H | -0.009967 | -2.651025 | 0.192006  |
| H | -0.525634 | -1.531641 | 1.436590  |
| H | -2.810549 | -0.298652 | 1.083424  |
| H | 0.294107  | -0.792977 | -1.404251 |
| H | -3.736575 | -0.631803 | -0.373623 |
| C | -0.540977 | 0.754149  | -0.176731 |
| C | 0.104748  | 2.053354  | -0.734885 |
| C | -0.449032 | 1.387572  | 1.245190  |
| C | 0.531117  | 2.449591  | 0.695428  |
| H | -0.676041 | 2.719133  | -1.104295 |
| H | 0.865109  | 1.964335  | -1.505580 |
| H | -1.402197 | 1.825376  | 1.543516  |
| H | -0.088588 | 0.752816  | 2.053831  |
| H | 0.353392  | 3.482077  | 0.989817  |
| H | 1.568672  | 2.198747  | 0.908903  |
| C | 1.740016  | -0.533709 | 0.165461  |
| H | -2.499768 | 1.520174  | -0.581488 |
| C | 2.318576  | -1.938883 | 0.383720  |
| H | 3.375765  | -1.862222 | 0.640069  |
| H | 1.825895  | -2.480601 | 1.188453  |
| H | 2.241627  | -2.538625 | -0.527474 |
| C | 2.693048  | 0.197327  | -0.790330 |
| H | 2.547318  | 1.272137  | -0.817579 |
| H | 3.726676  | 0.023035  | -0.487336 |
| H | 2.579721  | -0.186872 | -1.807447 |
| H | 1.765993  | -0.027127 | 1.134192  |

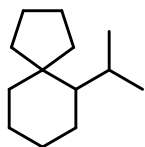

6-isopropylspiro[4.5]decane

| Conformation | Electronic Energy | Enthalpy    | Gibbs Free Energy |
|--------------|-------------------|-------------|-------------------|
| ax           | -509.766053       | -509.402137 | -509.454113       |
| ax1          | -509.768258       | -509.404274 | -509.455993       |
| ax2          | -509.764274       | -509.400289 | -509.451951       |
| ax3          | -509.766719       | -509.402869 | -509.455725       |
| ax4          | -509.764916       | -509.400981 | -509.452809       |
| ax5          | -509.768258       | -509.404272 | -509.455982       |
| ax6          | -509.762876       | -509.398999 | -509.450669       |
| ax7          | -509.767126       | -509.403172 | -509.455326       |
| ax8          | -509.766934       | -509.402978 | -509.454485       |
| ax9          | -509.763737       | -509.399609 | -509.450804       |
| eq1          | -509.766230       | -509.402171 | -509.45309        |

|     |  |             |  |             |  |             |
|-----|--|-------------|--|-------------|--|-------------|
| eq2 |  | -509.770183 |  | -509.406493 |  | -509.458434 |
| eq3 |  | -509.765638 |  | -509.401801 |  | -509.452723 |
| eq4 |  | -509.766965 |  | -509.403061 |  | -509.455692 |
| eq5 |  | -509.764186 |  | -509.400155 |  | -509.452144 |
| eq6 |  | -509.771026 |  | -509.407417 |  | -509.459022 |
| eq7 |  | -509.764468 |  | -509.400612 |  | -509.452169 |

ax

```
=====
```

|   |           |           |           |
|---|-----------|-----------|-----------|
| C | -0.110366 | 2.383717  | 0.615729  |
| C | 0.533386  | 1.105025  | 1.149124  |
| C | -0.603606 | -0.285070 | -0.678768 |
| H | -0.303452 | -0.807143 | -1.595926 |
| C | -1.450179 | 2.076054  | -0.047090 |
| C | -1.274280 | 1.023044  | -1.142234 |
| H | -2.230685 | 0.807960  | -1.618762 |
| H | -0.644043 | 1.464311  | -1.920136 |
| H | -2.159697 | 1.733018  | 0.707572  |
| H | -1.871913 | 2.984166  | -0.483048 |
| H | -0.239705 | 3.100876  | 1.428485  |
| H | 0.549022  | 2.855212  | -0.118753 |
| C | 0.726746  | 0.025868  | 0.063200  |
| C | 1.812534  | 0.519798  | -0.956260 |
| C | 1.372980  | -1.236724 | 0.686682  |
| C | 2.963339  | -0.496564 | -0.901878 |
| H | 2.185397  | 1.500508  | -0.657013 |
| H | 1.412674  | 0.626997  | -1.964301 |
| C | 2.880094  | -1.045541 | 0.520834  |
| H | 1.084069  | -2.122330 | 0.115778  |
| H | 1.061158  | -1.393551 | 1.720015  |
| H | 2.782956  | -1.310122 | -1.608854 |
| H | 3.927730  | -0.052321 | -1.146922 |
| H | 3.444979  | -1.966231 | 0.665828  |
| H | 3.255138  | -0.304772 | 1.231392  |
| H | 1.508077  | 1.331756  | 1.589891  |
| H | -0.089988 | 0.714755  | 1.954423  |
| C | -1.552990 | -1.306442 | 0.007420  |
| H | -0.996097 | -2.245620 | 0.036419  |
| C | -2.000923 | -1.036198 | 1.446459  |
| H | -2.665809 | -1.841461 | 1.767461  |
| H | -1.166227 | -1.010321 | 2.144154  |
| H | -2.555921 | -0.103126 | 1.539790  |
| C | -2.789590 | -1.567819 | -0.857561 |
| H | -2.525573 | -1.700303 | -1.908762 |
| H | -3.300399 | -2.471553 | -0.521517 |
| H | -3.504550 | -0.745606 | -0.791148 |

ax1

```
=====
```

|   |          |           |           |
|---|----------|-----------|-----------|
| C | 0.765974 | -0.164252 | 0.628946  |
| H | 0.704273 | -0.750509 | 1.554055  |
| C | 1.198689 | 1.263206  | 1.017078  |
| C | 1.188946 | 2.216165  | -0.179305 |

|   |           |           |           |
|---|-----------|-----------|-----------|
| H | 1.516083  | 3.210470  | 0.130969  |
| H | 1.900247  | 1.870037  | -0.934812 |
| C | -0.717854 | 0.887796  | -1.146682 |
| C | -0.202620 | 2.285812  | -0.804204 |
| H | -0.185132 | 2.902453  | -1.704945 |
| H | -0.887876 | 2.773105  | -0.105761 |
| H | 0.510047  | 1.646203  | 1.773693  |
| H | -0.114719 | 0.477488  | -1.961778 |
| H | -1.739730 | 0.954199  | -1.526380 |
| H | 2.181999  | 1.248925  | 1.484979  |
| C | 1.811088  | -0.884057 | -0.274507 |
| H | 1.615957  | -0.621824 | -1.318041 |
| C | -0.672038 | -0.092026 | 0.044065  |
| C | -1.276735 | -1.442154 | -0.383210 |
| C | -1.696910 | 0.329894  | 1.123145  |
| C | -2.797572 | -1.215243 | -0.437341 |
| H | -1.050665 | -2.186845 | 0.383120  |
| H | -0.876154 | -1.804193 | -1.330698 |
| C | -3.073903 | -0.066422 | 0.563342  |
| H | -1.650341 | 1.385399  | 1.382600  |
| H | -1.485063 | -0.237878 | 2.033301  |
| H | -3.109812 | -0.931845 | -1.442047 |
| H | -3.341671 | -2.123157 | -0.181133 |
| H | -3.537841 | 0.779313  | 0.055797  |
| H | -3.753559 | -0.369533 | 1.358483  |
| C | 3.256387  | -0.479597 | 0.041017  |
| H | 3.943862  | -1.065137 | -0.571206 |
| H | 3.460132  | 0.572456  | -0.148845 |
| H | 3.492093  | -0.684838 | 1.088663  |
| C | 1.744423  | -2.411138 | -0.143829 |
| H | 1.921621  | -2.703900 | 0.894506  |
| H | 0.795003  | -2.835418 | -0.453111 |
| H | 2.523976  | -2.872878 | -0.752490 |

ax2

```
=====
```

|   |           |           |           |
|---|-----------|-----------|-----------|
| C | -0.783766 | 0.072985  | 0.820895  |
| H | -0.598119 | 0.593425  | 1.766199  |
| C | -1.171430 | -1.369065 | 1.203153  |
| C | -1.209313 | -2.332522 | 0.017176  |
| H | -1.439850 | -3.339789 | 0.370343  |
| H | -2.012074 | -2.054208 | -0.667671 |
| C | 0.573708  | -0.920985 | -1.106338 |
| C | 0.128142  | -2.334919 | -0.722226 |
| H | 0.064818  | -2.953918 | -1.619305 |
| H | 0.883997  | -2.796046 | -0.081105 |
| H | -0.442081 | -1.745979 | 1.925839  |
| H | -0.080334 | -0.539817 | -1.890741 |
| H | 1.575720  | -0.966942 | -1.539341 |
| H | -2.136906 | -1.359911 | 1.713346  |
| C | -1.981736 | 0.848375  | 0.190746  |
| H | -2.867129 | 0.429122  | 0.679349  |
| C | 0.578218  | 0.064300  | 0.081953  |
| C | 1.061108  | 1.454529  | -0.370334 |



|   |           |           |           |
|---|-----------|-----------|-----------|
| C | 1.725430  | -0.310503 | 1.052582  |
| C | 2.577459  | 1.312546  | -0.584713 |
| H | 0.875731  | 2.164160  | 0.439509  |
| H | 0.545623  | 1.822720  | -1.257050 |
| C | 3.017781  | 0.178348  | 0.373894  |
| H | 1.761869  | -1.371548 | 1.292557  |
| H | 1.572033  | 0.229304  | 1.990422  |
| H | 2.795419  | 1.045495  | -1.618518 |
| H | 3.097517  | 2.247766  | -0.382397 |
| H | 3.491745  | -0.630602 | -0.181751 |
| H | 3.743170  | 0.523703  | 1.109174  |
| C | -1.964789 | 2.338762  | 0.552909  |
| H | -2.924375 | 2.795533  | 0.302557  |
| H | -1.789144 | 2.491062  | 1.618973  |
| H | -1.194409 | 2.878155  | 0.001783  |
| C | -2.222435 | 0.729151  | -1.318270 |
| H | -2.319197 | -0.298040 | -1.661263 |
| H | -3.150320 | 1.247732  | -1.569435 |
| H | -1.423965 | 1.202618  | -1.890038 |

ax3

```
=====
```

|   |           |           |           |
|---|-----------|-----------|-----------|
| C | -0.725182 | -0.225145 | -0.703822 |
| H | -0.573159 | -0.720886 | -1.669329 |
| C | -1.280080 | 1.173823  | -1.034691 |
| C | -1.213321 | 2.179502  | 0.116678  |
| H | -1.566345 | 3.152277  | -0.232156 |
| H | -1.876619 | 1.879195  | 0.929090  |
| C | 0.758250  | 0.927873  | 1.052222  |
| C | 0.211552  | 2.297031  | 0.648937  |
| H | 0.243449  | 2.971946  | 1.506431  |
| H | 0.847264  | 2.741118  | -0.121749 |
| H | -0.688029 | 1.579323  | -1.861106 |
| H | 0.195597  | 0.568007  | 1.915056  |
| H | 1.793988  | 1.030870  | 1.384083  |
| H | -2.301921 | 1.094022  | -1.407379 |
| C | -1.714577 | -1.180569 | 0.016039  |
| H | -1.219070 | -2.154637 | 0.024372  |
| C | 0.691018  | -0.117628 | -0.081581 |
| C | 1.240440  | -1.467727 | 0.411235  |
| C | 1.747075  | 0.231210  | -1.157500 |
| C | 2.765903  | -1.286419 | 0.487107  |
| H | 0.999804  | -2.233957 | -0.330915 |
| H | 0.803935  | -1.780715 | 1.360847  |
| C | 3.100753  | -0.191620 | -0.557879 |
| H | 1.733173  | 1.278841  | -1.454895 |
| H | 1.538227  | -0.362834 | -2.050376 |
| H | 3.064093  | -0.964783 | 1.484666  |
| H | 3.288966  | -2.220108 | 0.285634  |
| H | 3.594352  | 0.654553  | -0.080447 |
| H | 3.776922  | -0.557004 | -1.329499 |
| C | -2.093445 | -0.874147 | 1.466439  |
| H | -2.757768 | -1.659009 | 1.835420  |
| H | -1.230031 | -0.843413 | 2.127915  |

|   |           |           |           |
|---|-----------|-----------|-----------|
| H | -2.631025 | 0.069743  | 1.556599  |
| C | -2.996497 | -1.352794 | -0.804092 |
| H | -2.778541 | -1.521322 | -1.860602 |
| H | -3.568251 | -2.206852 | -0.437382 |
| H | -3.640351 | -0.474709 | -0.728830 |

ax4

```
=====
```

|   |           |           |           |
|---|-----------|-----------|-----------|
| C | 1.216223  | 1.015069  | -1.185030 |
| C | 0.564847  | -0.297822 | -0.713943 |
| C | -0.474465 | 1.074171  | 1.189127  |
| H | -1.441757 | 1.358195  | 1.614839  |
| H | 0.090023  | 0.613141  | 1.999631  |
| C | 1.539396  | 1.979999  | -0.046250 |
| C | 0.266799  | 2.328442  | 0.722377  |
| H | 0.498055  | 2.956407  | 1.585059  |
| H | -0.379954 | 2.921951  | 0.070962  |
| H | 2.274603  | 1.535303  | 0.627322  |
| H | 1.992308  | 2.888669  | -0.448290 |
| H | 2.107674  | 0.806759  | -1.775453 |
| H | 0.514999  | 1.513875  | -1.861670 |
| C | -0.733521 | 0.031758  | 0.077536  |
| C | -1.814805 | 0.600306  | -0.894386 |
| C | -1.423105 | -1.228750 | 0.690502  |
| C | -3.142357 | -0.000618 | -0.431963 |
| H | -1.610228 | 0.261826  | -1.913370 |
| H | -1.830003 | 1.689131  | -0.913114 |
| C | -2.740748 | -1.426972 | -0.068956 |
| H | -1.640041 | -1.039232 | 1.744671  |
| H | -0.796318 | -2.116520 | 0.652275  |
| H | -3.504213 | 0.519118  | 0.459212  |
| H | -3.921732 | 0.056624  | -1.191724 |
| H | -3.489368 | -1.960269 | 0.516617  |
| H | -2.565735 | -1.996999 | -0.985065 |
| C | 1.542434  | -1.322487 | -0.062947 |
| H | 1.062078  | -2.295953 | -0.187025 |
| H | 0.235981  | -0.809455 | -1.625483 |
| C | 2.861558  | -1.403356 | -0.834550 |
| H | 3.485246  | -0.525873 | -0.651615 |
| H | 3.427292  | -2.281067 | -0.518151 |
| H | 2.695357  | -1.479840 | -1.910841 |
| C | 1.839832  | -1.195470 | 1.434028  |
| H | 2.316094  | -0.249086 | 1.688455  |
| H | 0.942348  | -1.298021 | 2.042141  |
| H | 2.524758  | -1.994313 | 1.727354  |

ax5

```
=====
```

|   |           |           |           |
|---|-----------|-----------|-----------|
| C | -1.198648 | -1.263332 | -1.016894 |
| C | -0.765879 | 0.164133  | -0.628899 |
| C | 0.717942  | -0.887743 | 1.146810  |
| H | 1.739902  | -0.954289 | 1.526268  |
| H | 0.115060  | -0.477224 | 1.961995  |
| C | -1.189245 | -2.215903 | 0.179798  |

|   |           |           |           |
|---|-----------|-----------|-----------|
| C | 0.202357  | -2.285716 | 0.804636  |
| H | 0.184842  | -2.902260 | 1.705441  |
| H | 0.887404  | -2.773267 | 0.106159  |
| H | -1.900419 | -1.869246 | 0.935180  |
| H | -1.516637 | -3.210258 | -0.130048 |
| H | -2.181784 | -1.249101 | -1.485153 |
| H | -0.509752 | -1.646592 | -1.773163 |
| C | 0.672064  | 0.091930  | -0.044044 |
| C | 1.696735  | -0.330117 | -1.123220 |
| C | 1.276763  | 1.442074  | 0.383182  |
| C | 3.073814  | 0.066313  | -0.563664 |
| H | 1.484788  | 0.237440  | -2.033486 |
| H | 1.650180  | -1.385675 | -1.382467 |
| C | 2.797651  | 1.215295  | 0.436830  |
| H | 0.876487  | 1.803765  | 1.330900  |
| H | 1.050233  | 2.186899  | -0.382899 |
| H | 3.537904  | -0.779345 | -0.056111 |
| H | 3.753329  | 0.369292  | -1.358978 |
| H | 3.110343  | 0.932171  | 1.441488  |
| H | 3.341596  | 2.123195  | 0.180246  |
| C | -1.811130 | 0.883793  | 0.274477  |
| H | -1.616754 | 0.620663  | 1.317906  |
| H | -0.704072 | 0.750419  | -1.553970 |
| C | -1.743981 | 2.410967  | 0.144980  |
| H | -1.920033 | 2.704492  | -0.893333 |
| H | -2.524221 | 2.872212  | 0.753181  |
| H | -0.794890 | 2.834930  | 0.455762  |
| C | -3.256387 | 0.480246  | -0.042458 |
| H | -3.944116 | 1.066023  | 0.569263  |
| H | -3.490860 | 0.685893  | -1.090307 |
| H | -3.460866 | -0.571769 | 0.146919  |

ax6

```
=====
```

|   |           |           |           |
|---|-----------|-----------|-----------|
| C | 1.173904  | -1.154329 | 1.326180  |
| C | 0.646661  | 0.177644  | 0.764942  |
| C | -0.366971 | -1.172352 | -1.166114 |
| H | -1.327506 | -1.430743 | -1.622221 |
| H | 0.240718  | -0.747406 | -1.964423 |
| C | 1.537316  | -2.131502 | 0.209875  |
| C | 0.306432  | -2.443406 | -0.640327 |
| H | 0.574834  | -3.086636 | -1.480730 |
| H | -0.400602 | -3.010944 | -0.029830 |
| H | 2.324115  | -1.699749 | -0.414711 |
| H | 1.941969  | -3.053255 | 0.632136  |
| H | 2.038741  | -0.961836 | 1.964360  |
| H | 0.410053  | -1.613600 | 1.960478  |
| C | -0.624216 | -0.098984 | -0.086455 |
| C | -1.773667 | -0.599741 | 0.842623  |
| C | -1.226419 | 1.183282  | -0.744279 |
| C | -3.053373 | 0.015599  | 0.278310  |
| H | -1.618825 | -0.222456 | 1.856969  |
| H | -1.818660 | -1.686124 | 0.905039  |
| C | -2.594717 | 1.422866  | -0.091847 |

|   |           |           |           |
|---|-----------|-----------|-----------|
| H | -1.357595 | 1.010501  | -1.815280 |
| H | -0.578153 | 2.048613  | -0.641897 |
| H | -3.368779 | -0.520645 | -0.620563 |
| H | -3.881761 | -0.003090 | 0.986330  |
| H | -3.286100 | 1.954399  | -0.745337 |
| H | -2.477539 | 2.013957  | 0.820084  |
| C | 1.823333  | 1.009485  | 0.150404  |
| H | 2.737755  | 0.554117  | 0.542193  |
| H | 0.297748  | 0.765884  | 1.619021  |
| C | 1.990764  | 1.026343  | -1.373038 |
| H | 1.116713  | 1.429870  | -1.883849 |
| H | 2.841200  | 1.662503  | -1.627305 |
| H | 2.193325  | 0.037603  | -1.780186 |
| C | 1.817168  | 2.448867  | 0.678788  |
| H | 0.950646  | 3.010014  | 0.325075  |
| H | 1.798978  | 2.464334  | 1.769747  |
| H | 2.711430  | 2.982063  | 0.350537  |

ax7

```
=====
```

|   |           |           |           |
|---|-----------|-----------|-----------|
| C | -0.219733 | 1.547836  | 1.115779  |
| H | -1.070140 | 2.032025  | 1.603502  |
| C | 0.552288  | 2.559681  | 0.273813  |
| C | 1.721566  | 1.874900  | -0.425587 |
| H | 2.256091  | 2.585874  | -1.059123 |
| H | 2.432465  | 1.527869  | 0.326367  |
| C | 0.358368  | -0.335768 | -0.549854 |
| C | 1.225813  | 0.710004  | -1.284340 |
| H | 2.068082  | 0.215102  | -1.768490 |
| H | 0.627718  | 1.136897  | -2.093977 |
| H | -0.112242 | 2.999806  | -0.476161 |
| H | -0.171817 | -0.875066 | -1.342757 |
| H | 0.907419  | 3.377758  | 0.903239  |
| C | -0.752358 | 0.363734  | 0.297227  |
| C | -1.528050 | -0.621829 | 1.187642  |
| C | -1.884498 | 0.810999  | -0.659901 |
| C | -2.383043 | -1.440941 | 0.215533  |
| H | -2.181096 | -0.034785 | 1.840271  |
| H | -0.892707 | -1.231164 | 1.829253  |
| C | -2.744601 | -0.447106 | -0.916254 |
| H | -1.511187 | 1.250489  | -1.583998 |
| H | -2.482601 | 1.574768  | -0.156957 |
| H | -1.803107 | -2.274322 | -0.183667 |
| H | -3.264418 | -1.863802 | 0.695644  |
| H | -2.531955 | -0.879365 | -1.893429 |
| H | -3.805065 | -0.198541 | -0.905492 |
| C | 1.155877  | -1.459835 | 0.159889  |
| H | 0.411168  | -2.191143 | 0.483434  |
| H | 0.433847  | 1.188409  | 1.913543  |
| C | 2.071459  | -2.193726 | -0.824529 |
| H | 2.955299  | -1.602995 | -1.070789 |
| H | 2.419863  | -3.130975 | -0.387379 |
| H | 1.552491  | -2.428956 | -1.756044 |
| C | 1.963539  | -1.070884 | 1.398933  |

|   |          |           |          |
|---|----------|-----------|----------|
| H | 2.754507 | -0.360531 | 1.156515 |
| H | 1.344156 | -0.639254 | 2.183250 |
| H | 2.443457 | -1.960482 | 1.813139 |

ax8

```
=====
```

|   |           |           |           |
|---|-----------|-----------|-----------|
| C | 0.035492  | -1.468439 | 1.266588  |
| H | 0.831026  | -1.985853 | 1.808727  |
| C | -0.855549 | -2.475975 | 0.545437  |
| C | -1.940311 | -1.745140 | -0.239289 |
| H | -2.558796 | -2.453919 | -0.793515 |
| H | -2.598284 | -1.235715 | 0.469948  |
| C | -0.415010 | 0.304198  | -0.507065 |
| C | -1.318754 | -0.734434 | -1.203660 |
| H | -2.095363 | -0.227442 | -1.775042 |
| H | -0.724833 | -1.285388 | -1.935705 |
| H | -0.250637 | -3.077652 | -0.139560 |
| H | 0.096410  | 0.855308  | -1.304637 |
| H | -1.301682 | -3.165384 | 1.264687  |
| C | 0.680506  | -0.448697 | 0.318919  |
| C | 1.630080  | 0.478205  | 1.099132  |
| C | 1.701234  | -1.117353 | -0.631373 |
| C | 2.588593  | 1.070885  | 0.055317  |
| H | 2.200790  | -0.152549 | 1.786411  |
| H | 1.117976  | 1.221137  | 1.708081  |
| C | 2.659589  | 0.005893  | -1.068282 |
| H | 1.249656  | -1.627606 | -1.479396 |
| H | 2.251232  | -1.869363 | -0.058986 |
| H | 2.205123  | 2.010191  | -0.341506 |
| H | 3.566999  | 1.282389  | 0.484590  |
| H | 2.342047  | 0.433515  | -2.019136 |
| H | 3.671086  | -0.371094 | -1.213089 |
| C | -1.212213 | 1.366761  | 0.312639  |
| H | -1.240021 | 1.048610  | 1.358797  |
| H | -0.562541 | -0.940803 | 2.016848  |
| C | -0.547025 | 2.747785  | 0.247379  |
| H | -0.547082 | 3.107161  | -0.785110 |
| H | -1.107176 | 3.467958  | 0.846845  |
| H | 0.480116  | 2.754647  | 0.598928  |
| C | -2.661612 | 1.566274  | -0.147027 |
| H | -3.270963 | 0.668839  | -0.065213 |
| H | -3.131277 | 2.341238  | 0.461043  |
| H | -2.693932 | 1.901998  | -1.186307 |

ax9

```
=====
```

|   |          |           |           |
|---|----------|-----------|-----------|
| C | 0.744763 | -1.143760 | -1.275601 |
| H | 0.281107 | -1.866525 | -1.952572 |
| C | 1.893744 | -1.808540 | -0.516691 |
| C | 2.505063 | -0.851707 | 0.504497  |
| H | 3.276796 | -1.362773 | 1.083823  |
| H | 2.999690 | -0.027609 | -0.013737 |
| C | 0.243342 | 0.368765  | 0.731158  |
| C | 1.427898 | -0.317005 | 1.447251  |

|   |           |           |           |
|---|-----------|-----------|-----------|
| H | 1.864272  | 0.384530  | 2.160920  |
| H | 1.052179  | -1.156062 | 2.037296  |
| H | 1.519987  | -2.694853 | 0.005055  |
| H | -0.532639 | 0.483336  | 1.494775  |
| H | 2.653797  | -2.153959 | -1.220036 |
| C | -0.347410 | -0.589353 | -0.348764 |
| C | -1.509221 | 0.026635  | -1.151121 |
| C | -1.108120 | -1.741597 | 0.354931  |
| C | -2.712401 | 0.036971  | -0.197488 |
| H | -1.719012 | -0.644676 | -1.989158 |
| H | -1.288567 | 1.003719  | -1.573127 |
| C | -2.477990 | -1.161992 | 0.754648  |
| H | -0.575154 | -2.165681 | 1.203504  |
| H | -1.246417 | -2.545438 | -0.373003 |
| H | -2.744485 | 0.967994  | 0.367673  |
| H | -3.655094 | -0.041936 | -0.737322 |
| H | -2.471702 | -0.831251 | 1.793054  |
| H | -3.262705 | -1.912255 | 0.667209  |
| C | 0.603123  | 1.834083  | 0.329265  |
| H | 1.329733  | 2.153569  | 1.082453  |
| H | 1.145589  | -0.345082 | -1.901271 |
| C | 1.270758  | 2.075229  | -1.029565 |
| H | 0.606613  | 1.839987  | -1.861114 |
| H | 1.530244  | 3.132950  | -1.111699 |
| H | 2.187058  | 1.504069  | -1.160097 |
| C | -0.584396 | 2.793988  | 0.474159  |
| H | -1.330823 | 2.647686  | -0.306276 |
| H | -1.077166 | 2.672818  | 1.440229  |
| H | -0.238215 | 3.827133  | 0.403345  |

eq1

```
=====
```

|   |           |           |           |
|---|-----------|-----------|-----------|
| C | -2.644741 | -1.080799 | 0.118803  |
| C | -1.410207 | -1.493487 | -0.666538 |
| H | -1.585073 | -1.281286 | -1.727251 |
| C | -0.317336 | 0.770979  | -0.346090 |
| H | -0.424716 | 0.987806  | -1.418370 |
| C | -2.865192 | 0.411337  | -0.070707 |
| C | -1.628955 | 1.202870  | 0.343795  |
| H | -1.815702 | 2.253784  | 0.134096  |
| H | -1.499337 | 1.122149  | 1.429080  |
| H | -3.080805 | 0.605929  | -1.126411 |
| H | -3.729191 | 0.758661  | 0.499256  |
| H | -3.514774 | -1.649368 | -0.214984 |
| H | -2.504286 | -1.302368 | 1.181486  |
| C | -0.116611 | -0.776759 | -0.230123 |
| C | 0.283598  | -1.211223 | 1.204711  |
| C | 1.031439  | -1.328756 | -1.130232 |
| C | 1.804818  | -1.382092 | 1.195453  |
| H | -0.179316 | -2.177344 | 1.424103  |
| H | -0.056979 | -0.513202 | 1.969915  |
| C | 2.097943  | -1.945642 | -0.200286 |
| H | 1.442010  | -0.550166 | -1.766984 |
| H | 0.636242  | -2.091560 | -1.801520 |

|   |           |           |           |
|---|-----------|-----------|-----------|
| H | 2.298813  | -0.420586 | 1.332758  |
| H | 2.152765  | -2.041466 | 1.990938  |
| H | 3.116044  | -1.739515 | -0.531934 |
| H | 1.979999  | -3.030496 | -0.179670 |
| H | -1.239322 | -2.570105 | -0.585460 |
| C | 0.849397  | 1.655102  | 0.182061  |
| H | 1.047175  | 1.357151  | 1.216267  |
| C | 2.159258  | 1.545774  | -0.609231 |
| H | 1.987161  | 1.772133  | -1.664941 |
| H | 2.874475  | 2.277448  | -0.229642 |
| H | 2.635770  | 0.572460  | -0.547187 |
| C | 0.471950  | 3.144373  | 0.207464  |
| H | -0.290864 | 3.378112  | 0.946709  |
| H | 1.350893  | 3.743964  | 0.446750  |
| H | 0.106860  | 3.467806  | -0.771485 |

eq2

```
=====
```

|   |           |           |           |
|---|-----------|-----------|-----------|
| C | -1.848157 | -0.127435 | 0.596522  |
| C | -0.689397 | -0.432409 | -0.361676 |
| H | -1.107715 | -0.369506 | -1.374857 |
| C | -0.356488 | 2.013188  | -0.710220 |
| H | 0.363166  | 2.835854  | -0.673288 |
| H | -0.687036 | 1.926806  | -1.751355 |
| C | -2.550722 | 1.172582  | 0.206499  |
| C | -1.561267 | 2.334328  | 0.172834  |
| H | -2.051156 | 3.242788  | -0.183052 |
| H | -1.221444 | 2.539911  | 1.191953  |
| H | -2.998240 | 1.049356  | -0.784869 |
| H | -3.365560 | 1.389042  | 0.900049  |
| H | -2.566576 | -0.948559 | 0.594426  |
| H | -1.474738 | -0.040756 | 1.621084  |
| C | -0.169978 | -1.886886 | -0.254026 |
| H | 0.677431  | -1.976957 | -0.936891 |
| C | 0.366270  | 0.710613  | -0.315817 |
| C | 1.068874  | 0.883013  | 1.067304  |
| C | 1.531284  | 0.448865  | -1.302270 |
| C | 2.581649  | 0.713449  | 0.825734  |
| H | 0.707097  | 0.153763  | 1.787821  |
| H | 0.855634  | 1.863666  | 1.493188  |
| C | 2.684857  | -0.103959 | -0.464208 |
| H | 1.844367  | 1.400822  | -1.740011 |
| H | 1.235663  | -0.203478 | -2.125521 |
| H | 3.039878  | 1.691656  | 0.664261  |
| H | 3.092559  | 0.249901  | 1.669902  |
| H | 3.652233  | 0.002744  | -0.955343 |
| H | 2.536423  | -1.163607 | -0.252679 |
| C | 0.298201  | -2.332247 | 1.134241  |
| H | 0.520246  | -3.401291 | 1.120660  |
| H | 1.199361  | -1.818525 | 1.463987  |
| H | -0.479404 | -2.170287 | 1.884006  |
| C | -1.233145 | -2.870828 | -0.755784 |
| H | -1.624249 | -2.572748 | -1.730212 |
| H | -0.806853 | -3.870346 | -0.855293 |

H -2.072968 -2.943902 -0.062763

eq3

```
=====
C 1.416378 1.476025 0.510501
C 0.256990 0.938557 -0.345680
H 0.515376 1.170802 -1.387751
C 1.616252 -1.111776 -0.778761
H 1.629217 -2.203833 -0.718983
H 1.707306 -0.854236 -1.839942
C 2.769066 0.986032 0.000567
C 2.811557 -0.537974 -0.021643
H 3.739495 -0.889659 -0.476984
H 2.808767 -0.907975 1.007061
H 2.925454 1.369209 -1.012817
H 3.577055 1.380480 0.619799
H 1.393131 2.568116 0.508595
H 1.287105 1.160841 1.550804
C -1.021063 1.781575 -0.079379
H -0.647141 2.807908 -0.154133
C 0.240539 -0.617150 -0.277910
C -0.037530 -1.193125 1.145627
C -0.854814 -1.265768 -1.170689
C -1.105140 -2.282998 0.967018
H -0.404350 -0.419659 1.814893
H 0.867815 -1.593436 1.601217
C -1.932200 -1.789668 -0.220179
H -0.416957 -2.121807 -1.690929
H -1.227729 -0.588675 -1.935852
H -0.630397 -3.231762 0.704751
H -1.694113 -2.447634 1.869372
H -2.549848 -2.568282 -0.668202
H -2.593571 -0.983965 0.102038
C -2.113385 1.677428 -1.147896
H -2.810582 2.510276 -1.034611
H -1.694715 1.729426 -2.154458
H -2.693612 0.759624 -1.066801
C -1.649923 1.670511 1.312315
H -2.377276 2.474194 1.444109
H -2.180970 0.727863 1.447172
H -0.909824 1.762182 2.108290
```

eq4

```
=====
C 0.907686 0.173927 -0.363485
H 1.059093 0.548813 -1.384757
C 1.329995 1.319768 0.567955
C 0.651679 2.627566 0.152703
H 0.931474 3.434951 0.832251
H 1.020414 2.905542 -0.839837
C -1.294598 1.268371 -0.722182
C -0.868474 2.487600 0.098004
H -1.312583 3.389503 -0.328071
H -1.260038 2.403021 1.114524
```



|   |           |           |           |
|---|-----------|-----------|-----------|
| H | 1.069141  | 1.078122  | 1.602304  |
| H | -1.027364 | 1.431084  | -1.771401 |
| H | -2.381348 | 1.169194  | -0.687094 |
| H | 2.411292  | 1.456780  | 0.539376  |
| C | 1.830045  | -1.067063 | -0.293012 |
| H | 1.488566  | -1.756351 | -1.068051 |
| C | -0.623754 | -0.044273 | -0.253878 |
| C | -1.147765 | -1.215249 | -1.100683 |
| C | -1.179413 | -0.419129 | 1.139129  |
| C | -2.584954 | -1.454587 | -0.610222 |
| H | -0.550838 | -2.105325 | -0.894679 |
| H | -1.085701 | -1.014767 | -2.172419 |
| C | -2.591597 | -0.979727 | 0.866036  |
| H | -1.201901 | 0.421215  | 1.830276  |
| H | -0.561613 | -1.187967 | 1.594991  |
| H | -3.295746 | -0.876717 | -1.199998 |
| H | -2.870641 | -2.501090 | -0.705350 |
| H | -3.347414 | -0.208775 | 1.014424  |
| H | -2.830779 | -1.791529 | 1.551481  |
| C | 3.268746  | -0.685660 | -0.661655 |
| H | 3.768992  | -0.165119 | 0.156496  |
| H | 3.850583  | -1.582841 | -0.878130 |
| H | 3.301399  | -0.041118 | -1.542367 |
| C | 1.842882  | -1.830269 | 1.033852  |
| H | 0.936655  | -2.412808 | 1.188723  |
| H | 2.682086  | -2.528728 | 1.049802  |
| H | 1.963409  | -1.152733 | 1.882129  |

eq5

```
=====
```

|   |           |           |           |
|---|-----------|-----------|-----------|
| C | -0.811200 | -0.696669 | -0.272558 |
| H | -0.873163 | -1.020028 | -1.319922 |
| C | -0.556469 | -1.978639 | 0.539435  |
| C | 0.610198  | -2.779515 | -0.040441 |
| H | 0.800934  | -3.668734 | 0.563600  |
| H | 0.323999  | -3.128115 | -1.037890 |
| C | 1.601236  | -0.605096 | -0.857874 |
| C | 1.877195  | -1.935060 | -0.155401 |
| H | 2.646380  | -2.485803 | -0.700566 |
| H | 2.281549  | -1.748096 | 0.842200  |
| H | -0.355691 | -1.726791 | 1.585122  |
| H | 1.330771  | -0.799754 | -1.900846 |
| H | 2.515570  | -0.009784 | -0.878125 |
| H | -1.455680 | -2.598254 | 0.531944  |
| C | -2.222081 | -0.122638 | 0.026088  |
| H | -2.844068 | -1.016657 | 0.133804  |
| C | 0.452040  | 0.203466  | -0.208259 |
| C | 0.322332  | 1.556924  | -0.925999 |
| C | 0.901472  | 0.674166  | 1.194789  |
| C | 1.549817  | 2.368795  | -0.478152 |
| H | -0.574597 | 2.062236  | -0.571320 |
| H | 0.241921  | 1.453029  | -2.010224 |
| C | 1.909023  | 1.810890  | 0.923523  |
| H | 1.334555  | -0.120276 | 1.799372  |

|   |           |          |           |
|---|-----------|----------|-----------|
| H | 0.050320  | 1.066573 | 1.744596  |
| H | 2.380726  | 2.233599 | -1.169510 |
| H | 1.331126  | 3.435236 | -0.450156 |
| H | 2.930064  | 1.429965 | 0.932452  |
| H | 1.851859  | 2.579082 | 1.693318  |
| C | -2.386919 | 0.666244 | 1.325441  |
| H | -1.920223 | 1.650164 | 1.261540  |
| H | -3.448976 | 0.822761 | 1.524776  |
| H | -1.962532 | 0.140544 | 2.181802  |
| C | -2.838741 | 0.654149 | -1.142771 |
| H | -2.405312 | 1.645165 | -1.267055 |
| H | -2.717901 | 0.113131 | -2.083015 |
| H | -3.909052 | 0.788715 | -0.972832 |

eq6

```
=====
```

|   |           |           |           |
|---|-----------|-----------|-----------|
| C | -0.228531 | 2.768548  | 0.263706  |
| C | -1.014401 | 1.798620  | -0.612405 |
| H | -0.742534 | 1.975395  | -1.658553 |
| C | 0.784363  | 0.067212  | -0.412715 |
| H | 1.005749  | 0.300371  | -1.462520 |
| C | 1.267840  | 2.512076  | 0.110113  |
| C | 1.595635  | 1.057026  | 0.435547  |
| H | 2.662676  | 0.872715  | 0.290732  |
| H | 1.392695  | 0.882273  | 1.495658  |
| H | 1.563205  | 2.729786  | -0.921282 |
| H | 1.842262  | 3.179749  | 0.755133  |
| H | -0.471513 | 3.798593  | -0.003914 |
| H | -0.514288 | 2.635993  | 1.312055  |
| C | -0.744538 | 0.319888  | -0.278955 |
| C | -1.316991 | -0.033958 | 1.121592  |
| C | -1.559926 | -0.576756 | -1.259754 |
| C | -1.967195 | -1.410924 | 0.972154  |
| H | -2.096208 | 0.690188  | 1.376485  |
| H | -0.574059 | 0.012606  | 1.915327  |
| C | -2.604866 | -1.325496 | -0.415998 |
| H | -0.906472 | -1.285879 | -1.768269 |
| H | -2.029542 | 0.026668  | -2.037237 |
| H | -1.210230 | -2.197621 | 0.990757  |
| H | -2.688218 | -1.625620 | 1.761188  |
| H | -2.867903 | -2.297367 | -0.833134 |
| H | -3.522170 | -0.735618 | -0.350672 |
| H | -2.088790 | 1.984421  | -0.528640 |
| C | 1.260117  | -1.394736 | -0.195719 |
| H | 0.457745  | -2.065283 | -0.506564 |
| C | 2.462719  | -1.692469 | -1.094851 |
| H | 3.289943  | -1.012401 | -0.877616 |
| H | 2.823840  | -2.711079 | -0.941374 |
| H | 2.204294  | -1.580176 | -2.149026 |
| C | 1.617366  | -1.755323 | 1.249393  |
| H | 0.814812  | -1.538657 | 1.952557  |
| H | 1.836589  | -2.822576 | 1.316254  |
| H | 2.508562  | -1.218716 | 1.580015  |

eq7

```

=====
C  -2.737475    -0.644118    0.182564
C  -1.568990    -1.236042   -0.594422
H  -1.751261    -1.075535   -1.662185
C  -0.274186     0.910563   -0.481918
H  -0.494148     1.019897   -1.552980
C  -2.807818     0.855837   -0.075989
C  -1.475440     1.507283    0.277925
H  -1.520463     2.581198    0.081871
H  -1.316156     1.394045    1.353793
H  -3.031058     1.028988   -1.133581
H  -3.613540     1.313402    0.501355
H  -3.668307    -1.133696   -0.109984
H  -2.606432    -0.822234    1.254343
C  -0.192893    -0.625608   -0.241099
C   0.200206    -1.025280    1.215947
C   0.852687    -1.357767   -1.132893
C   1.568641    -1.708353    1.115140
H  -0.522318    -1.751432    1.596003
H   0.192159    -0.185882    1.907331
C   1.490065    -2.421652   -0.233532
H   1.623552    -0.679868   -1.481074
H   0.380229    -1.784935   -2.018516
H   2.367884    -0.963697    1.080811
H   1.771035    -2.376082    1.952620
H   2.456490    -2.765580   -0.601843
H   0.835036    -3.292562   -0.149337
H  -1.511570    -2.317476   -0.442548
C   0.953063     1.838891   -0.236946
H   0.562582     2.821223   -0.521875
C   1.425535     1.982587    1.213645
H   1.952286     1.092943    1.557679
H   2.126657     2.817168    1.279888
H   0.608585     2.186169    1.905148
C   2.177065     1.617531   -1.130760
H   1.898428     1.423531   -2.167747
H   2.799323     2.514704   -1.114852
H   2.798256     0.792477   -0.780286

```

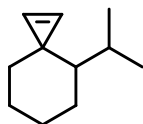

4-isopropylspiro[2.5]oct-1-ene

| Conformation | Electronic Energy | Enthalpy    | Gibbs Free Energy |
|--------------|-------------------|-------------|-------------------|
| ax1          | -429.860276       | -429.583441 | -429.631433       |

|     |  |             |  |             |  |             |
|-----|--|-------------|--|-------------|--|-------------|
| ax2 |  | -429.866396 |  | -429.589842 |  | -429.63835  |
| ax3 |  | -429.861286 |  | -429.584565 |  | -429.633271 |
| ax4 |  | -429.860304 |  | -429.583398 |  | -429.631546 |
| eq1 |  | -429.866018 |  | -429.589467 |  | -429.6374   |
| eq2 |  | -429.863626 |  | -429.58704  |  | -429.635447 |
| eq3 |  | -429.866883 |  | -429.590348 |  | -429.638249 |

ax1

```

=====
C  -0.352200    1.007598   -0.066016
C   0.345667   -0.027949    0.829292
H   0.639070    0.524427    1.726690
C   0.192380    2.402662   -0.191242
C  -0.669063   -1.096718    1.285131
C  -1.576436   -1.650583    0.179922
H  -2.326047   -2.304176    0.630839
H  -1.005840   -2.264084   -0.517894
C  -1.209261    0.422341   -1.181530
C  -2.255592   -0.530062   -0.602931
H  -2.876932   -0.946261   -1.398049
H  -2.918374    0.032988    0.062468
H   0.944049    3.028030   -0.641866
H  -0.139326   -1.914653    1.781165
H  -1.691233    1.236379   -1.725195
H  -0.587630   -0.120134   -1.899477
H  -1.315469   -0.641003    2.041516
C   1.680034   -0.625246    0.312136
H   2.133325   -1.086697    1.196107
C   2.635924    0.466254   -0.169090
H   3.637248    0.057110   -0.313679
H   2.306706    0.881728   -1.123313
H   2.705440    1.286318    0.548325
C  -0.831549    2.284979    0.584199
H  -1.551106    2.731308    1.249391
C   1.589162   -1.729310   -0.742488
H   1.052782   -2.602747   -0.374287
H   1.102405   -1.387248   -1.656329
H   2.596542   -2.055078   -1.010714

```

ax2

```

=====
C  -0.770498    0.834953    0.075095
C   0.393520    0.008539    0.630627
H   0.763396    0.521306    1.525279
C  -0.821744    2.324638    0.247961
C  -0.165979   -1.362047    1.053601
C  -0.858132   -2.086427   -0.103763
H  -1.268547   -3.035057    0.247269
H  -0.127367   -2.330726   -0.879577
C  -1.454321    0.159286   -1.106771
C  -1.970884   -1.226495   -0.706270
H  -2.416972   -1.729557   -1.566217
H  -2.764057   -1.101487    0.038033

```

|   |           |           |           |
|---|-----------|-----------|-----------|
| H | -0.438983 | 3.274963  | -0.084141 |
| H | 0.616717  | -1.989430 | 1.480726  |
| H | -2.276455 | 0.783876  | -1.459459 |
| H | -0.747315 | 0.057202  | -1.936961 |
| H | -0.899913 | -1.196254 | 1.848476  |
| C | 1.588174  | -0.097384 | -0.342204 |
| H | 1.278968  | -0.660931 | -1.225967 |
| C | 2.762197  | -0.839394 | 0.297835  |
| H | 3.624545  | -0.840044 | -0.370786 |
| H | 3.062207  | -0.349721 | 1.228460  |
| H | 2.523369  | -1.877663 | 0.525598  |
| C | -1.601657 | 1.654322  | 1.028742  |
| H | -2.335941 | 1.639460  | 1.816458  |
| C | 2.047650  | 1.283892  | -0.809866 |
| H | 1.286280  | 1.787407  | -1.404486 |
| H | 2.281384  | 1.922056  | 0.047184  |
| H | 2.948735  | 1.201296  | -1.419813 |

ax3

```
=====
```

|   |           |           |           |
|---|-----------|-----------|-----------|
| C | -0.895688 | -0.833570 | 0.041537  |
| C | 0.384505  | -0.274054 | -0.605798 |
| H | 0.568378  | -0.914945 | -1.472635 |
| C | -0.952648 | -2.302659 | 0.354677  |
| C | 0.169554  | 1.150419  | -1.158007 |
| C | -0.638893 | 2.088129  | -0.256980 |
| H | -0.810429 | 3.028059  | -0.785424 |
| H | -0.080973 | 2.332109  | 0.648953  |
| C | -1.712689 | 0.141144  | 0.883362  |
| C | -1.966131 | 1.450707  | 0.139836  |
| H | -2.548587 | 2.132301  | 0.762332  |
| H | -2.557345 | 1.249693  | -0.759691 |
| H | -0.625284 | -3.086749 | 1.016176  |
| H | 1.133021  | 1.603498  | -1.400938 |
| H | -2.655124 | -0.337165 | 1.154898  |
| H | -1.191412 | 0.366664  | 1.818337  |
| H | -0.373840 | 1.062137  | -2.103585 |
| C | 1.646747  | -0.450441 | 0.270582  |
| H | 1.586886  | -1.464176 | 0.680644  |
| C | 1.776579  | 0.518904  | 1.445275  |
| H | 2.648429  | 0.256403  | 2.047689  |
| H | 1.920819  | 1.541500  | 1.091009  |
| H | 0.905309  | 0.504170  | 2.098409  |
| C | -1.626331 | -1.936412 | -0.683246 |
| H | -2.261762 | -2.187450 | -1.515658 |
| C | 2.916232  | -0.383929 | -0.580519 |
| H | 3.797430  | -0.601122 | 0.025777  |
| H | 2.883709  | -1.104470 | -1.399387 |
| H | 3.053355  | 0.610111  | -1.011211 |

ax4

```
=====
```

|   |           |           |           |
|---|-----------|-----------|-----------|
| C | 0.246073  | 0.996157  | 0.047260  |
| C | -0.334902 | -0.152705 | -0.791401 |

|   |           |           |           |
|---|-----------|-----------|-----------|
| H | -0.763888 | 0.313987  | -1.682222 |
| C | -0.562222 | 2.243084  | 0.286581  |
| C | 0.796376  | -1.065280 | -1.304459 |
| C | 1.812197  | -1.491861 | -0.245243 |
| H | 2.599525  | -2.083733 | -0.716227 |
| H | 1.342118  | -2.134015 | 0.502940  |
| C | 1.308933  | 0.590057  | 1.067310  |
| C | 2.409676  | -0.264299 | 0.437434  |
| H | 3.135822  | -0.559939 | 1.196860  |
| H | 2.948005  | 0.330581  | -0.307812 |
| H | -1.366526 | 2.693691  | 0.842565  |
| H | 0.360502  | -1.940312 | -1.791840 |
| H | 1.735122  | 1.494960  | 1.503587  |
| H | 0.856199  | 0.025825  | 1.885593  |
| H | 1.342294  | -0.515836 | -2.078399 |
| C | -1.515820 | -0.921930 | -0.141711 |
| H | -1.607852 | -1.864156 | -0.691290 |
| C | -2.827705 | -0.155178 | -0.332926 |
| H | -3.671413 | -0.733139 | 0.048914  |
| H | -2.808420 | 0.793442  | 0.206672  |
| H | -3.014319 | 0.060265  | -1.386010 |
| C | 0.371201  | 2.356044  | -0.596483 |
| H | 0.907689  | 2.956758  | -1.311091 |
| C | -1.364741 | -1.265118 | 1.341209  |
| H | -0.468856 | -1.845051 | 1.554401  |
| H | -1.334645 | -0.357209 | 1.947291  |
| H | -2.225750 | -1.849941 | 1.670644  |

eq1

```
=====
```

|   |           |           |           |
|---|-----------|-----------|-----------|
| C | -0.545379 | 0.926788  | -0.067928 |
| C | 0.324339  | -0.326714 | -0.285234 |
| H | 0.353650  | -0.522544 | -1.366479 |
| C | 0.011968  | 2.308758  | 0.115095  |
| C | -0.400435 | -1.516808 | 0.365769  |
| C | -1.819711 | -1.699509 | -0.174092 |
| H | -2.303220 | -2.539153 | 0.328937  |
| H | -1.759865 | -1.958484 | -1.236254 |
| C | -1.938751 | 0.755247  | -0.661438 |
| C | -2.656013 | -0.432635 | -0.021298 |
| H | -3.643472 | -0.570943 | -0.465716 |
| H | -2.808723 | -0.223932 | 1.042472  |
| H | 0.438465  | 3.173128  | -0.364895 |
| H | 0.159534  | -2.436510 | 0.198073  |
| H | -2.511109 | 1.673151  | -0.519463 |
| H | -1.856035 | 0.584115  | -1.740605 |
| H | -0.435699 | -1.357405 | 1.450032  |
| C | 1.781382  | -0.164765 | 0.185239  |
| H | 1.767351  | 0.324620  | 1.164133  |
| C | 2.571379  | 0.712605  | -0.787710 |
| H | 3.574190  | 0.911733  | -0.406330 |
| H | 2.675185  | 0.197733  | -1.746498 |
| H | 2.090287  | 1.670005  | -0.980244 |
| C | -0.399849 | 1.734745  | 1.195638  |

|   |           |           |           |
|---|-----------|-----------|-----------|
| H | -0.554649 | 1.774303  | 2.260452  |
| C | 2.516119  | -1.497168 | 0.343755  |
| H | 2.111700  | -2.102690 | 1.153631  |
| H | 2.461458  | -2.083226 | -0.577512 |
| H | 3.570664  | -1.317174 | 0.559485  |

eq2

```
=====
```

|   |           |           |           |
|---|-----------|-----------|-----------|
| C | -0.321458 | 0.900232  | -0.096393 |
| C | 0.177721  | -0.502119 | -0.464748 |
| H | 0.001179  | -0.610173 | -1.543719 |
| C | 0.568888  | 2.107805  | -0.014378 |
| C | -0.722112 | -1.539606 | 0.226271  |
| C | -2.189368 | -1.374425 | -0.166426 |
| H | -2.803571 | -2.116769 | 0.346787  |
| H | -2.296208 | -1.558342 | -1.240224 |
| C | -1.781416 | 1.083222  | -0.504273 |
| C | -2.682240 | 0.035619  | 0.151486  |
| H | -3.715356 | 0.163038  | -0.177287 |
| H | -2.669961 | 0.184658  | 1.236019  |
| H | 1.126174  | 2.846615  | -0.564387 |
| H | -0.376064 | -2.546556 | -0.021439 |
| H | -2.107849 | 2.089585  | -0.237543 |
| H | -1.864564 | 0.990918  | -1.593249 |
| H | -0.633376 | -1.428618 | 1.311248  |
| C | 1.670464  | -0.835197 | -0.265153 |
| H | 1.763912  | -1.861056 | -0.636352 |
| C | 2.158235  | -0.856636 | 1.186184  |
| H | 3.165124  | -1.277283 | 1.226350  |
| H | 2.207708  | 0.144297  | 1.613571  |
| H | 1.521913  | -1.469367 | 1.825032  |
| C | 0.180627  | 1.631625  | 1.120860  |
| H | 0.188239  | 1.684603  | 2.196210  |
| C | 2.599783  | 0.024115  | -1.124676 |
| H | 2.224875  | 0.116270  | -2.145956 |
| H | 2.720201  | 1.027417  | -0.716325 |
| H | 3.592875  | -0.427043 | -1.171252 |

eq3

```
=====
```

|   |           |           |           |
|---|-----------|-----------|-----------|
| C | -0.650357 | 0.907133  | -0.273696 |
| C | 0.319028  | -0.274840 | -0.419560 |
| H | 0.212485  | -0.617271 | -1.457766 |
| C | -0.204569 | 2.324726  | -0.496753 |
| C | -0.154708 | -1.428668 | 0.476679  |
| C | -1.584889 | -1.850767 | 0.140493  |
| H | -1.901562 | -2.663446 | 0.796972  |
| H | -1.614399 | -2.237282 | -0.883268 |
| C | -2.079281 | 0.498016  | -0.614083 |
| C | -2.545899 | -0.669162 | 0.257666  |
| H | -3.557438 | -0.970311 | -0.021062 |
| H | -2.585154 | -0.341071 | 1.301374  |
| H | 0.086098  | 3.070649  | -1.216858 |
| H | 0.519234  | -2.283234 | 0.382720  |

|   |           |           |           |
|---|-----------|-----------|-----------|
| H | -2.742958 | 1.355763  | -0.494852 |
| H | -2.124707 | 0.193696  | -1.666104 |
| H | -0.119018 | -1.107162 | 1.522097  |
| C | 1.804730  | 0.080122  | -0.228217 |
| H | 1.963507  | 1.054224  | -0.700669 |
| C | 2.706114  | -0.925377 | -0.945293 |
| H | 3.757261  | -0.656160 | -0.826693 |
| H | 2.576574  | -1.930605 | -0.538459 |
| H | 2.485808  | -0.963487 | -2.013260 |
| C | -0.427488 | 2.001673  | 0.733697  |
| H | -0.455709 | 2.287347  | 1.771497  |
| C | 2.227606  | 0.195376  | 1.237037  |
| H | 3.245062  | 0.584044  | 1.305808  |
| H | 1.576966  | 0.857513  | 1.808682  |
| H | 2.216222  | -0.782606 | 1.722020  |

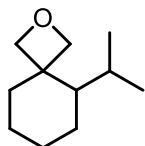

5-isopropyl-2-oxaspiro[3.5]nonane

| Conformation | Electronic Energy | Enthalpy    | Gibbs Free Energy |
|--------------|-------------------|-------------|-------------------|
| ax1          | -506.341260       | -506.032061 | -506.08198        |
| ax2          | -506.347172       | -506.038153 | -506.087843       |
| ax3          | -506.338407       | -506.029044 | -506.078381       |
| ax4          | -506.339902       | -506.030668 | -506.080588       |
| eq1          | -506.341320       | -506.032165 | -506.081838       |
| eq2          | -506.343692       | -506.034659 | -506.085279       |
| eq3          | -506.341320       | -506.032165 | -506.081838       |
| eq4          | -506.340230       | -506.031038 | -506.080205       |

ax1

|   |           |           |           |
|---|-----------|-----------|-----------|
| C | -0.453558 | -0.265509 | -0.721764 |
| H | -0.282042 | -0.813808 | -1.654347 |
| C | -0.860343 | 1.156897  | -1.144335 |
| C | -0.822548 | 2.182134  | -0.012105 |
| H | -1.097059 | 3.165308  | -0.398891 |
| H | -1.556005 | 1.928008  | 0.756615  |
| C | 0.994252  | 0.847365  | 1.098472  |
| C | 0.574568  | 2.229623  | 0.602534  |
| H | 0.614862  | 2.947135  | 1.423500  |
| H | 1.281815  | 2.575613  | -0.158172 |



|   |           |           |           |
|---|-----------|-----------|-----------|
| H | -0.147431 | 1.484001  | -1.909787 |
| H | 0.366044  | 0.566478  | 1.943379  |
| H | 2.023847  | 0.871067  | 1.465899  |
| H | -1.838083 | 1.145483  | -1.625048 |
| C | 0.903371  | -0.210858 | -0.006336 |
| C | 1.533810  | -1.551498 | 0.408620  |
| C | 2.133151  | -0.123071 | -0.937200 |
| H | 1.050048  | -2.430400 | -0.024731 |
| H | 1.697620  | -1.707264 | 1.476326  |
| H | 1.917812  | -0.345855 | -1.985582 |
| H | 2.743550  | 0.778478  | -0.868212 |
| C | -1.533273 | -1.114707 | 0.004096  |
| H | -1.214945 | -2.151975 | -0.134310 |
| C | -2.896036 | -0.978656 | -0.674922 |
| H | -2.817658 | -1.077459 | -1.759363 |
| H | -3.576578 | -1.750925 | -0.313599 |
| H | -3.351016 | -0.010135 | -0.457187 |
| O | 2.762024  | -1.245819 | -0.284999 |
| C | -1.688342 | -0.926342 | 1.514825  |
| H | -0.778771 | -1.190516 | 2.053978  |
| H | -1.960596 | 0.094853  | 1.782043  |
| H | -2.481917 | -1.583810 | 1.876164  |

ax2

```
=====
```

|   |           |           |           |
|---|-----------|-----------|-----------|
| C | -0.542512 | -0.111932 | -0.626106 |
| H | -0.557869 | -0.749573 | -1.518409 |
| C | -0.688311 | 1.354834  | -1.071232 |
| C | -0.591224 | 2.319240  | 0.113725  |
| H | -0.668961 | 3.348585  | -0.240470 |
| H | -1.432000 | 2.159664  | 0.793068  |
| C | 0.987954  | 0.666375  | 1.231608  |
| C | 0.728520  | 2.131527  | 0.866045  |
| H | 0.745838  | 2.748586  | 1.765740  |
| H | 1.543737  | 2.485401  | 0.228432  |
| H | 0.118571  | 1.583936  | -1.775122 |
| H | 0.290239  | 0.342287  | 2.008880  |
| H | 1.994450  | 0.557672  | 1.643744  |
| H | -1.620622 | 1.505925  | -1.614186 |
| C | 0.844511  | -0.244719 | 0.012446  |
| C | 1.458400  | -1.641998 | 0.224992  |
| C | 2.033526  | -0.078845 | -0.958086 |
| H | 0.953994  | -2.438352 | -0.326103 |
| H | 1.636223  | -1.955643 | 1.255032  |
| H | 1.760534  | -0.210541 | -2.009285 |
| H | 2.658515  | 0.807678  | -0.846502 |
| C | -1.708568 | -0.574345 | 0.274289  |
| H | -1.743348 | 0.061901  | 1.160871  |
| C | -1.539588 | -2.015295 | 0.756202  |
| H | -0.670729 | -2.136030 | 1.403256  |
| H | -2.416094 | -2.323744 | 1.328205  |
| H | -1.435522 | -2.700567 | -0.088581 |
| O | 2.678776  | -1.258976 | -0.439852 |
| C | -3.049391 | -0.435796 | -0.448973 |

|   |           |           |           |
|---|-----------|-----------|-----------|
| H | -3.854178 | -0.849996 | 0.160045  |
| H | -3.300432 | 0.602347  | -0.663118 |
| H | -3.032456 | -0.981994 | -1.396142 |

ax3

```
=====
C  -0.455874    0.192541    0.850420
H  -0.157776    0.728724    1.757969
C  -0.765393   -1.257072    1.275054
C  -0.825755   -2.269843    0.122882
H  -0.922298   -3.274024    0.540658
H  -1.709409   -2.104205   -0.490048
C   0.691388   -0.768726   -1.230354
C   0.411549   -2.199901   -0.770236
H   0.288919   -2.855516   -1.633807
H   1.277285   -2.572261   -0.216208
H   0.022890   -1.580781    1.962896
H  -0.098163   -0.425179   -1.902211
H   1.627303   -0.732671   -1.794078
H  -1.699435   -1.279321    1.842080
C   0.800185    0.176364   -0.033266
C   1.512021    1.496663   -0.392183
C   2.121796   -0.093227    0.725453
H   1.232666    2.340602    0.238740
H   1.510130    1.795864   -1.441618
H   2.058642    0.123050    1.796204
H   2.615722   -1.051836    0.569550
C  -1.712915    0.966794    0.364991
H  -2.314539    1.078969    1.273133
C  -2.630640    0.283218   -0.652864
H  -3.066502   -0.633543   -0.260434
H  -3.456812    0.956876   -0.889143
H  -2.121836    0.050679   -1.588361
O   2.789584    0.972587    0.022306
C  -1.388441    2.378256   -0.123581
H  -0.808862    2.940059    0.608943
H  -0.829331    2.355835   -1.062052
H  -2.312793    2.927590   -0.308563
```

ax4

```
=====
C   1.235378   -0.485192    1.101000
H   2.153186   -0.038599    1.493325
C   1.522851   -1.878176    0.541554
C   0.295650   -2.447139   -0.168633
H   0.519674   -3.433459   -0.578212
H  -0.520143   -2.577233    0.549416
C  -0.529353   -0.114037   -0.748603
C  -0.143107   -1.501344   -1.284457
H  -0.981132   -1.920113   -1.844817
H   0.687922   -1.391230   -1.990052
H   2.346667   -1.820177   -0.176924
H  -0.643956    0.538369   -1.618607
H   1.849396   -2.539874    1.345282
```

|   |           |           |           |
|---|-----------|-----------|-----------|
| C | 0.661108  | 0.456364  | 0.038121  |
| C | 0.570889  | 1.911228  | 0.532792  |
| C | 1.791810  | 1.016515  | -0.854451 |
| H | 0.647806  | 2.063328  | 1.610952  |
| H | -0.278251 | 2.473866  | 0.139254  |
| H | 2.760458  | 0.518050  | -0.794186 |
| H | 1.510675  | 1.153780  | -1.901738 |
| C | -1.924389 | -0.124055 | -0.046990 |
| H | 0.546487  | -0.566313 | 1.940779  |
| C | -1.932877 | -0.052978 | 1.481290  |
| H | -2.963843 | 0.015069  | 1.833454  |
| H | -1.488417 | -0.933263 | 1.941712  |
| H | -1.403814 | 0.829137  | 1.848426  |
| C | -2.808750 | 0.995850  | -0.603858 |
| H | -2.406288 | 1.977493  | -0.344944 |
| H | -2.879506 | 0.939358  | -1.691106 |
| H | -3.818707 | 0.932065  | -0.195227 |
| H | -2.402287 | -1.069309 | -0.320120 |
| O | 1.791101  | 2.273355  | -0.146657 |

eq1

```
=====
```

|   |           |           |           |
|---|-----------|-----------|-----------|
| C | 0.304048  | 0.649236  | -0.277849 |
| H | 0.339987  | 0.934422  | -1.337685 |
| C | -0.483044 | 1.731365  | 0.490183  |
| C | -1.909607 | 1.933682  | -0.005353 |
| H | -2.398085 | 2.718431  | 0.574931  |
| H | -1.893620 | 2.266172  | -1.047974 |
| C | -1.942969 | -0.465989 | -0.664249 |
| C | -2.680318 | 0.625003  | 0.098615  |
| H | -3.695193 | 0.731945  | -0.287598 |
| H | -2.765764 | 0.341115  | 1.152581  |
| H | -0.520258 | 1.427716  | 1.543433  |
| H | -1.930156 | -0.214164 | -1.730587 |
| H | -2.468117 | -1.419903 | -0.571828 |
| H | 0.056813  | 2.676469  | 0.459592  |
| C | -0.492335 | -0.669242 | -0.211394 |
| C | 0.068482  | -1.942298 | -0.878724 |
| C | -0.370481 | -1.485143 | 1.092093  |
| H | 1.044853  | -1.876159 | -1.350497 |
| H | -0.629267 | -2.420689 | -1.569044 |
| H | 0.366236  | -1.121315 | 1.811131  |
| H | -1.309445 | -1.694602 | 1.608394  |
| C | 1.760721  | 0.663345  | 0.265871  |
| H | 1.687094  | 0.784179  | 1.351462  |
| C | 2.512434  | 1.877615  | -0.292628 |
| H | 1.988409  | 2.818209  | -0.132400 |
| H | 3.495611  | 1.964092  | 0.172401  |
| H | 2.664242  | 1.757219  | -1.368179 |
| O | 0.115995  | -2.644753 | 0.382283  |
| C | 2.633884  | -0.568380 | 0.016442  |
| H | 2.221706  | -1.481870 | 0.441073  |
| H | 2.801562  | -0.725246 | -1.050904 |
| H | 3.610542  | -0.403153 | 0.475391  |

eq2

```
=====
C  -0.334123    -0.489646    -0.400265
H  -0.229644    -0.862692    -1.427050
C   0.107476    -1.623905     0.534598
C   1.507065    -2.128904     0.186607
H   1.805478    -2.918983     0.877938
H   1.492195    -2.567989    -0.815803
C   2.073262     0.159921    -0.688155
C   2.518784    -0.985767     0.218820
H   3.508032    -1.338549    -0.076808
H   2.606324    -0.613725     1.245356
H   0.109354    -1.259435     1.566715
H   2.052987    -0.183099    -1.727678
H   2.785146     0.986414    -0.634364
H  -0.609429    -2.445874     0.493947
C   0.686502     0.663332    -0.304686
C   0.247144     1.984634    -0.955103
C   0.629390     1.500259     0.987830
H  -0.583334     1.969790    -1.660049
H   1.083944     2.539302    -1.388871
H   0.115106     1.094617     1.856268
H   1.613240     1.871605     1.290913
C  -1.834103    -0.130583    -0.247351
H  -2.005669     0.821207    -0.752411
C  -2.337336     0.022005     1.189935
H  -1.860240     0.845686     1.716249
H  -3.410017     0.223944     1.178434
H  -2.185526    -0.892944     1.765526
O  -0.124605     2.538283     0.325608
C  -2.689741    -1.177867    -0.966943
H  -2.580280    -2.162548    -0.507422
H  -3.746257    -0.909504    -0.919359
H  -2.410496    -1.264361    -2.018123
```

eq3

```
=====
C   0.304049     0.649235    -0.277849
H   0.339986     0.934424    -1.337684
C  -0.483044     1.731361     0.490188
C  -1.909606     1.933682    -0.005351
H  -2.398084     2.718430     0.574935
H  -1.893616     2.266176    -1.047971
C  -1.942968    -0.465988    -0.664252
C  -2.680318     0.625004     0.098612
H  -3.695192     0.731947    -0.287604
H  -2.765768     0.341114     1.152577
H  -0.520261     1.427706     1.543435
H  -1.930152    -0.214162    -1.730590
H  -2.468117    -1.419901    -0.571833
H   0.056815     2.676465     0.459604
C  -0.492335    -0.669243    -0.211395
C   0.068482    -1.942299    -0.878723
```

|   |           |           |           |
|---|-----------|-----------|-----------|
| C | -0.370482 | -1.485142 | 1.092093  |
| H | 1.044854  | -1.876161 | -1.350496 |
| H | -0.629266 | -2.420690 | -1.569043 |
| H | 0.366235  | -1.121313 | 1.811130  |
| H | -1.309446 | -1.694599 | 1.608394  |
| C | 1.760721  | 0.663345  | 0.265870  |
| H | 1.687095  | 0.784182  | 1.351461  |
| C | 2.512432  | 1.877615  | -0.292631 |
| H | 1.988403  | 2.818209  | -0.132409 |
| H | 3.495608  | 1.964097  | 0.172400  |
| H | 2.664243  | 1.757215  | -1.368181 |
| O | 0.115994  | -2.644753 | 0.382285  |
| C | 2.633884  | -0.568380 | 0.016442  |
| H | 2.221707  | -1.481870 | 0.441074  |
| H | 2.801563  | -0.725247 | -1.050903 |
| H | 3.610543  | -0.403152 | 0.475392  |

eq4

```
=====
```

|   |           |           |           |
|---|-----------|-----------|-----------|
| C | -1.814627 | 0.976112  | -0.617404 |
| H | -1.905116 | 0.807936  | -1.695841 |
| C | -2.773395 | 0.048985  | 0.123022  |
| C | -2.383093 | -1.407715 | -0.102230 |
| H | -3.033859 | -2.071526 | 0.469712  |
| H | -2.516763 | -1.657911 | -1.159285 |
| C | 0.044084  | -0.713628 | -0.471787 |
| C | -0.925736 | -1.633391 | 0.290517  |
| H | -0.644781 | -2.674395 | 0.116688  |
| H | -0.822658 | -1.454517 | 1.365404  |
| H | -2.730516 | 0.271151  | 1.194722  |
| H | -0.139611 | -0.874422 | -1.542183 |
| H | -3.799599 | 0.230967  | -0.199876 |
| C | -0.361044 | 0.752349  | -0.206726 |
| C | 0.603607  | 1.848140  | -0.691114 |
| C | 0.021100  | 1.301349  | 1.182737  |
| H | 0.071037  | 2.755724  | -0.990586 |
| H | 1.351979  | 1.606396  | -1.439519 |
| H | -0.716692 | 2.008408  | 1.573832  |
| H | 0.301668  | 0.598931  | 1.964370  |
| C | 1.501810  | -1.197932 | -0.243449 |
| H | -2.077188 | 2.019886  | -0.432521 |
| C | 2.554137  | -0.580251 | -1.167820 |
| H | 3.437852  | -1.220747 | -1.191783 |
| H | 2.189335  | -0.476942 | -2.191242 |
| H | 2.875802  | 0.398462  | -0.812303 |
| C | 2.022211  | -1.157907 | 1.196370  |
| H | 1.318071  | -1.585388 | 1.910265  |
| H | 2.945315  | -1.737527 | 1.259612  |
| H | 2.256095  | -0.138240 | 1.501640  |
| H | 1.445663  | -2.256043 | -0.518762 |
| O | 1.157455  | 2.004140  | 0.633120  |

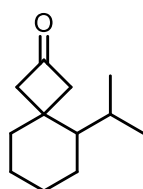

5-isopropylspiro[3.5]nonan-2-one

| Conformation | Electronic Energy | Enthalpy    | Gibbs Free Energy |
|--------------|-------------------|-------------|-------------------|
| ax1          | -544.463130       | -544.149308 | -544.201279       |
| ax3          | -544.461282       | -544.147521 | -544.199606       |
| ax4          | -544.460328       | -544.146693 | -544.199265       |
| ax5          | -544.462488       | -544.148677 | -544.200669       |
| ax6          | -544.467090       | -544.153371 | -544.205297       |
| eq1          | -544.462730       | -544.149116 | -544.201222       |
| eq2          | -544.466117       | -544.152554 | -544.204955       |
| eq3          | -544.462427       | -544.148634 | -544.199797       |
| eq4          | -544.462160       | -544.148351 | -544.200374       |

ax1

```

=====
C  -0.660109   -0.298804   -0.716212
H  -0.391107   -0.810097   -1.647112
C  -1.317448    1.025750   -1.142966
C  -1.465575    2.047499   -0.016048
H  -1.902980    2.966015   -0.411895
H  -2.150889    1.676619    0.748855
C   0.557929    1.058186    1.103225
C  -0.104830    2.343135    0.610465
H  -0.203909    3.048380    1.437126
H   0.532899    2.820649   -0.139736
H  -0.678629    1.472759   -1.912437
H  -0.012837    0.662030    1.942623
H   1.561297    1.274223    1.483710
H  -2.278594    0.835408   -1.619725
C   0.668157    0.000810   -0.002892

```

|   |           |           |           |
|---|-----------|-----------|-----------|
| C | 1.489474  | -1.236728 | 0.472796  |
| C | 1.842375  | 0.381222  | -0.970114 |
| H | 1.204174  | -2.151964 | -0.050955 |
| H | 1.569651  | -1.429827 | 1.541949  |
| H | 1.674495  | 0.037001  | -1.992744 |
| H | 2.197219  | 1.410734  | -0.979577 |
| C | -1.573582 | -1.327189 | 0.004783  |
| H | -1.052763 | -2.284030 | -0.093442 |
| C | -2.910534 | -1.479333 | -0.722230 |
| H | -2.774184 | -1.572121 | -1.801505 |
| H | -3.432796 | -2.369837 | -0.369675 |
| H | -3.560683 | -0.621746 | -0.537369 |
| C | 2.693089  | -0.614221 | -0.205752 |
| O | 3.878466  | -0.774374 | -0.096665 |
| C | -1.824102 | -1.140158 | 1.502948  |
| H | -0.905051 | -1.209346 | 2.083457  |
| H | -2.303346 | -0.188050 | 1.730541  |
| H | -2.488768 | -1.932826 | 1.853221  |

ax3

```
=====
```

|   |           |           |           |
|---|-----------|-----------|-----------|
| C | -0.750610 | 0.192059  | 0.776085  |
| H | -0.447070 | 0.753104  | 1.664858  |
| C | -1.308657 | -1.150688 | 1.275907  |
| C | -1.542070 | -2.146380 | 0.141604  |
| H | -1.956582 | -3.074410 | 0.539098  |
| H | -2.278698 | -1.745773 | -0.560123 |
| C | 0.412181  | -1.140383 | -1.101629 |
| C | -0.228699 | -2.429451 | -0.586359 |
| H | -0.386576 | -3.119313 | -1.416862 |
| H | 0.455956  | -2.923452 | 0.109729  |
| H | -0.593128 | -1.590899 | 1.978488  |
| H | -0.174386 | -0.746442 | -1.930183 |
| H | 1.406910  | -1.356078 | -1.504733 |
| H | -2.230811 | -0.974493 | 1.832704  |
| C | 0.547852  | -0.076651 | -0.004592 |
| C | 1.349897  | 1.159664  | -0.518603 |
| C | 1.759943  | -0.445067 | 0.920217  |
| H | 1.093482  | 2.075898  | 0.015893  |
| H | 1.384544  | 1.349999  | -1.590513 |
| H | 1.633207  | -0.079454 | 1.941559  |
| H | 2.109758  | -1.476189 | 0.936576  |
| C | -1.848848 | 1.066818  | 0.094422  |
| H | -2.805986 | 0.680214  | 0.456888  |
| C | -1.917897 | 1.048413  | -1.434541 |
| H | -2.136103 | 0.060791  | -1.835908 |
| H | -2.713622 | 1.719167  | -1.764225 |
| H | -0.986772 | 1.401374  | -1.881414 |
| C | 2.580972  | 0.537152  | 0.108699  |
| O | 3.760927  | 0.690461  | -0.054968 |
| C | -1.760562 | 2.522915  | 0.563642  |
| H | -1.758606 | 2.589989  | 1.652469  |
| H | -0.853170 | 3.004521  | 0.194696  |
| H | -2.610769 | 3.097345  | 0.191633  |

ax4

```
=====  
C -0.363521 -1.363931 1.194734  
H 0.335616 -1.987703 1.757770  
C -1.348839 -2.241870 0.424068  
C -2.238589 -1.397964 -0.487117  
H -2.922168 -2.039322 -1.045960  
H -2.855117 -0.726011 0.117371  
C -0.417052 0.365297 -0.717815  
C -1.376256 -0.587144 -1.451792  
H -1.998761 -0.010727 -2.138391  
H -0.796002 -1.285280 -2.062501  
H -0.791926 -2.955728 -0.191861  
H 0.278573 0.749802 -1.471444  
H -1.950256 -2.826176 1.122242  
C 0.444061 -0.457067 0.266256  
C 1.567125 0.368269 0.972518  
C 1.551926 -1.237288 -0.527731  
H 1.785108 -0.013318 1.973033  
H 1.491814 1.451811 1.007053  
H 1.768401 -2.216895 -0.096037  
H 1.453150 -1.325781 -1.608666  
C -1.168495 1.621554 -0.169399  
H -0.905057 -0.765896 1.926785  
C -1.494162 1.657042 1.326460  
H -1.971318 2.609678 1.564341  
H -2.182659 0.866749 1.619928  
H -0.599505 1.575973 1.945307  
C -0.435046 2.908043 -0.563327  
H 0.539206 2.981419 -0.076795  
H -0.271981 2.951259 -1.641277  
H -1.015767 3.785964 -0.274941  
H -2.129551 1.646162 -0.690901  
C 2.541710 -0.201538 -0.036538  
O 3.645129 0.116702 -0.389619
```

ax5

```
=====  
C -0.150618 1.405091 1.154963  
H -1.001785 1.875968 1.653501  
C 0.644498 2.445546 0.369450  
C 1.778946 1.782915 -0.408731  
H 2.316278 2.527982 -0.998484  
H 2.500694 1.351293 0.288644  
C 0.401969 -0.384769 -0.616286  
C 1.219334 0.704389 -1.335174  
H 2.015071 0.251197 -1.924710  
H 0.554832 1.197678 -2.051574  
H -0.020684 2.952790 -0.337321  
H -0.133228 -0.922404 -1.408561  
H 1.031282 3.208439 1.046915  
C -0.681683 0.290727 0.252543  
C -1.634740 -0.728608 0.953240
```



|   |           |           |           |
|---|-----------|-----------|-----------|
| C | -1.878567 | 0.757328  | -0.647728 |
| H | -2.008307 | -0.349081 | 1.907203  |
| H | -1.315647 | -1.762069 | 1.072116  |
| H | -2.344112 | 1.675878  | -0.283662 |
| H | -1.726227 | 0.822713  | -1.724080 |
| C | 1.221283  | -1.501830 | 0.090111  |
| H | 0.482184  | 0.989553  | 1.938938  |
| C | 2.391393  | -1.969485 | -0.776311 |
| H | 2.799833  | -2.901696 | -0.383535 |
| H | 2.083951  | -2.144305 | -1.809145 |
| H | 3.198099  | -1.233674 | -0.784588 |
| C | 1.713313  | -1.228138 | 1.512635  |
| H | 2.386583  | -0.372172 | 1.561945  |
| H | 0.889017  | -1.054987 | 2.203930  |
| H | 2.263312  | -2.099997 | 1.873103  |
| H | 0.537901  | -2.351291 | 0.168075  |
| C | -2.636024 | -0.457472 | -0.151060 |
| O | -3.605460 | -1.044499 | -0.549328 |

ax6

```
=====
```

|   |           |           |           |
|---|-----------|-----------|-----------|
| C | -0.540525 | 0.921597  | 1.248999  |
| H | -1.537473 | 1.057972  | 1.678808  |
| C | 0.051793  | 2.283202  | 0.873974  |
| C | 1.366205  | 2.153363  | 0.100138  |
| H | 1.680101  | 3.135381  | -0.257815 |
| H | 2.155762  | 1.797223  | 0.766612  |
| C | 0.744309  | -0.199993 | -0.622485 |
| C | 1.212272  | 1.193467  | -1.082076 |
| H | 2.142441  | 1.124018  | -1.644015 |
| H | 0.467277  | 1.601851  | -1.770905 |
| H | -0.666811 | 2.822094  | 0.250330  |
| H | 0.597498  | -0.827501 | -1.510370 |
| H | 0.196656  | 2.883994  | 1.773237  |
| C | -0.630523 | -0.012686 | 0.039515  |
| C | -1.499963 | -1.273363 | 0.349975  |
| C | -1.750021 | 0.472219  | -0.944843 |
| H | -1.624379 | -1.581999 | 1.386800  |
| H | -1.218483 | -2.130726 | -0.264258 |
| H | -2.072914 | 1.511213  | -0.913151 |
| H | -1.537147 | 0.180958  | -1.976403 |
| C | 1.804226  | -0.908610 | 0.253394  |
| H | 0.068499  | 0.445657  | 2.022403  |
| C | 1.389880  | -2.322009 | 0.666910  |
| H | 2.218223  | -2.818355 | 1.174905  |
| H | 0.541783  | -2.325147 | 1.348393  |
| H | 1.127544  | -2.923923 | -0.207105 |
| C | 3.153246  | -0.976100 | -0.467634 |
| H | 3.040785  | -1.439703 | -1.451792 |
| H | 3.600578  | 0.007013  | -0.607767 |
| H | 3.858285  | -1.579160 | 0.105949  |
| H | 1.949588  | -0.331438 | 1.168833  |
| C | -2.660164 | -0.547291 | -0.295330 |
| O | -3.854027 | -0.664025 | -0.224487 |

eq1

```
=====
C  0.884310    0.376918    0.266097
H  1.223818    0.444564    1.308208
C  1.984466   -0.320723   -0.560339
C  2.332232   -1.723963   -0.078383
H  3.120605   -2.147393   -0.703148
H  2.721787   -1.676009    0.943312
C -0.011755   -1.953185    0.719288
C  1.088949   -2.601807   -0.106455
H  1.302279   -3.601513    0.275428
H  0.752804   -2.718518   -1.141665
H  1.629383   -0.385572   -1.595689
H  0.303017   -1.911085    1.767652
H -0.920638   -2.560497    0.689047
H  2.882628    0.294254   -0.579322
C -0.367113   -0.526081    0.277652
C -1.621936   -0.079773    1.099349
C -1.219371   -0.525869   -1.033414
H -1.621473    0.917076    1.528640
H -1.927342   -0.791531    1.867839
H -0.989485    0.278272   -1.734600
H -1.282181   -1.468373   -1.578025
C  0.744980    1.825641   -0.278874
H  0.792759    1.756614   -1.370700
C  1.931827    2.675645    0.192711
H  2.897628    2.226504   -0.030090
H  1.907713    3.658539   -0.279867
H  1.873250    2.826190    1.273559
C -2.433263   -0.203851   -0.178466
O -3.606473   -0.113736   -0.419124
C -0.527190    2.604493    0.061165
H -1.434229    2.153374   -0.337531
H -0.645193    2.726542    1.139438
H -0.452166    3.603776   -0.371484
```

eq2

```
=====
C  0.281434    0.711173    0.393594
H  0.637865    0.954169    1.402471
C  1.324647    1.251711   -0.592312
C  2.723029    0.716248   -0.288738
H  3.438822    1.098696   -1.018466
H  3.041875    1.078355    0.693622
C  1.681020   -1.353695    0.679874
C  2.729768   -0.810596   -0.287010
H  3.717930   -1.190601   -0.022850
H  2.507826   -1.172602   -1.296353
H  1.045057    0.958160   -1.608942
H  1.937164   -1.054908    1.701756
H  1.668001   -2.445977    0.657128
H  1.327554    2.343301   -0.570905
C  0.284086   -0.832584    0.352672
```

|   |           |           |           |
|---|-----------|-----------|-----------|
| C | -0.856838 | -1.484855 | 1.192605  |
| C | -0.344674 | -1.458925 | -0.936272 |
| H | -1.351128 | -0.909667 | 1.972878  |
| H | -0.541231 | -2.452973 | 1.587900  |
| H | -0.425140 | -0.880781 | -1.852408 |
| H | 0.119452  | -2.423936 | -1.155997 |
| C | -1.092326 | 1.418935  | 0.257749  |
| H | -1.848164 | 0.800368  | 0.745983  |
| C | -1.562745 | 1.674530  | -1.176859 |
| H | -1.652898 | 0.765511  | -1.768261 |
| H | -2.545887 | 2.147681  | -1.156744 |
| H | -0.884692 | 2.352772  | -1.697779 |
| C | -1.599819 | -1.684261 | -0.115881 |
| O | -2.758402 | -1.829064 | -0.397754 |
| C | -1.061289 | 2.750332  | 1.013640  |
| H | -0.300772 | 3.416974  | 0.601046  |
| H | -2.022880 | 3.260415  | 0.938665  |
| H | -0.839290 | 2.599479  | 2.070914  |

eq3

```
=====
```

|   |           |           |           |
|---|-----------|-----------|-----------|
| C | 0.379980  | 0.841879  | 0.436217  |
| H | 0.674974  | 1.025883  | 1.477434  |
| C | 1.517365  | 1.377108  | -0.450741 |
| C | 2.873572  | 0.771804  | -0.099976 |
| H | 3.645676  | 1.172451  | -0.759140 |
| H | 3.143976  | 1.055162  | 0.921970  |
| C | 1.687870  | -1.294447 | 0.663789  |
| C | 2.817061  | -0.748508 | -0.202191 |
| H | 3.767873  | -1.193841 | 0.095033  |
| H | 2.641800  | -1.033732 | -1.244794 |
| H | 1.295802  | 1.152543  | -1.498435 |
| H | 1.896524  | -1.073780 | 1.716100  |
| H | 1.626760  | -2.381259 | 0.570313  |
| H | 1.556425  | 2.465126  | -0.363534 |
| C | 0.325837  | -0.697760 | 0.303838  |
| C | -0.846416 | -1.410821 | 1.048313  |
| C | -0.253404 | -1.221197 | -1.053540 |
| H | -1.376800 | -0.911533 | 1.852560  |
| H | -0.529668 | -2.402161 | 1.382533  |
| H | -0.329557 | -0.553746 | -1.907677 |
| H | 0.237968  | -2.148727 | -1.357567 |
| C | -0.888721 | 1.714037  | 0.227771  |
| H | -0.509235 | 2.725311  | 0.403364  |
| C | -2.008590 | 1.509006  | 1.252049  |
| H | -1.617413 | 1.397386  | 2.264661  |
| H | -2.670033 | 2.377269  | 1.243280  |
| H | -2.623687 | 0.638731  | 1.022446  |
| C | -1.529783 | -1.541582 | -0.297608 |
| O | -2.669719 | -1.715760 | -0.635181 |
| C | -1.490403 | 1.729349  | -1.181486 |
| H | -2.048477 | 0.818335  | -1.398420 |
| H | -2.194339 | 2.560044  | -1.259693 |
| H | -0.737027 | 1.863399  | -1.957593 |

eq4

|   |           |           |           |
|---|-----------|-----------|-----------|
| C | -1.594847 | -1.390315 | 0.726643  |
| H | -1.763415 | -1.124850 | 1.776060  |
| C | -2.764628 | -0.900005 | -0.112911 |
| C | -2.832005 | 0.618224  | -0.046372 |
| H | -3.640116 | 0.999908  | -0.672918 |
| H | -3.055353 | 0.920488  | 0.981842  |
| C | -0.291639 | 0.757908  | 0.330174  |
| C | -1.510173 | 1.249574  | -0.475280 |
| H | -1.601254 | 2.328637  | -0.377097 |
| H | -1.336219 | 1.043218  | -1.538014 |
| H | -2.623679 | -1.215326 | -1.152027 |
| H | -0.457984 | 1.034614  | 1.380036  |
| H | -3.696511 | -1.348670 | 0.234919  |
| C | -0.260071 | -0.792721 | 0.282499  |
| C | 0.942890  | -1.483156 | 1.000289  |
| C | 0.268075  | -1.355973 | -1.080207 |
| H | 0.636413  | -2.471080 | 1.353662  |
| H | 1.490988  | -0.975163 | 1.786843  |
| H | -0.227840 | -2.292651 | -1.344214 |
| H | 0.312242  | -0.706664 | -1.952217 |
| C | 1.006817  | 1.486608  | -0.126866 |
| H | -1.517328 | -2.478961 | 0.680821  |
| C | 0.766229  | 2.984191  | -0.363396 |
| H | 1.713358  | 3.476845  | -0.583674 |
| H | 0.095469  | 3.179541  | -1.197080 |
| H | 0.346342  | 3.454846  | 0.530065  |
| C | 2.175244  | 1.365226  | 0.864092  |
| H | 2.667644  | 0.397792  | 0.844581  |
| H | 2.936971  | 2.108490  | 0.625604  |
| H | 1.836150  | 1.557028  | 1.885113  |
| H | 1.323878  | 1.061980  | -1.084158 |
| C | 1.578083  | -1.637539 | -0.366922 |
| O | 2.707050  | -1.795268 | -0.746076 |

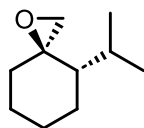

(3*R*,4*S*)-4-isopropyl-1-oxaspiro[2.5]octane

| Conformation | Electronic Energy | Enthalpy    | Gibbs Free Energy |
|--------------|-------------------|-------------|-------------------|
| ax1          | -467.048026       | -466.769854 | -466.817988       |
| ax2          | -467.042430       | -466.764015 | -466.811775       |
| ax3          | -467.041618       | -466.763073 | -466.810607       |
| ax4          | -467.041370       | -466.762891 | -466.811473       |

|     |  |             |  |             |  |             |
|-----|--|-------------|--|-------------|--|-------------|
| eq1 |  | -467.046226 |  | -466.767849 |  | -466.815384 |
| eq2 |  | -467.044448 |  | -466.766181 |  | -466.813856 |
| eq3 |  | -467.041228 |  | -466.762715 |  | -466.810103 |

ax1

```

=====
C  0.735314    0.790682   -0.045626
C -0.427041   -0.001132   -0.616200
H -0.776150    0.532157   -1.506625
C  0.841375    2.232574   -0.267991
C  0.125475   -1.372234   -1.042750
C  0.807695   -2.103141    0.116510
H  1.204230   -3.057633   -0.233179
H  0.076730   -2.333429    0.896172
C  1.445459    0.135320    1.114507
C  1.938180   -1.256802    0.706390
H  2.387724   -1.759914    1.563399
H  2.722933   -1.140892   -0.046491
H  1.404609    2.839976    0.431868
H  0.060932    2.743754   -0.819965
H -0.662264   -1.987124   -1.476726
H  2.278018    0.766015    1.428240
H  0.754519    0.055739    1.957922
H  0.864179   -1.205895   -1.831849
O  1.623739    1.320507   -1.042178
C -1.616028   -0.086364    0.363284
H -1.298216   -0.626996    1.257978
C -2.786479   -0.850352   -0.255354
H -2.545416   -1.895440   -0.446062
H -3.649266   -0.828018    0.411904
H -3.084254   -0.392844   -1.202634
C -2.081087    1.303601    0.799035
H -1.307997    1.844192    1.345367
H -2.362436    1.904157   -0.070084
H -2.954964    1.225217    1.447363

```

ax2

```

=====
C -0.872885   -0.768260    0.134387
C  0.411189   -0.326159   -0.549118
H  0.565460   -1.063545   -1.340944
C -1.101622   -2.198686    0.344733
C  0.204480    1.040403   -1.232318
C -0.549507    2.075210   -0.387914
H -0.749008    2.954232   -1.003492
H  0.062897    2.410755    0.449574
C -1.601236    0.248319    0.977538
C -1.861140    1.509361    0.153427
H -2.377105    2.255130    0.759337
H -2.522466    1.257202   -0.680704
H -1.754540   -2.523996    1.146722
H -0.343109   -2.908483    0.032870
H  1.168100    1.443765   -1.550259

```

|   |           |           |           |
|---|-----------|-----------|-----------|
| H | -2.534459 | -0.192985 | 1.329426  |
| H | -1.000754 | 0.495365  | 1.855508  |
| H | -0.375757 | 0.871558  | -2.143663 |
| O | -1.756022 | -1.512320 | -0.724581 |
| C | 1.664027  | -0.434700 | 0.355670  |
| H | 1.529529  | -1.334093 | 0.964386  |
| C | 1.916711  | 0.737889  | 1.303663  |
| H | 1.076530  | 0.939442  | 1.965854  |
| H | 2.785380  | 0.519575  | 1.927257  |
| H | 2.136634  | 1.649611  | 0.744750  |
| C | 2.907047  | -0.647287 | -0.511085 |
| H | 3.067275  | 0.204466  | -1.176232 |
| H | 3.798327  | -0.753273 | 0.109274  |
| H | 2.812857  | -1.542709 | -1.126914 |

ax3

```
=====
```

|   |           |           |           |
|---|-----------|-----------|-----------|
| C | -0.408354 | 0.921180  | -0.085264 |
| C | 0.380789  | -0.009702 | 0.822788  |
| H | 0.615379  | 0.597633  | 1.701393  |
| C | -0.094364 | 2.351537  | -0.127939 |
| C | -0.540887 | -1.154279 | 1.290615  |
| C | -1.388167 | -1.797477 | 0.184273  |
| H | -2.088391 | -2.499648 | 0.640549  |
| H | -0.763775 | -2.376344 | -0.496101 |
| C | -1.192635 | 0.286512  | -1.207545 |
| C | -2.152940 | -0.751196 | -0.624437 |
| H | -2.722210 | -1.229475 | -1.422394 |
| H | -2.870366 | -0.239229 | 0.022957  |
| H | -0.360866 | 2.926189  | -1.008277 |
| H | 0.733316  | 2.736286  | 0.455377  |
| H | 0.056583  | -1.914895 | 1.798991  |
| H | -1.736181 | 1.065839  | -1.743029 |
| H | -0.510996 | -0.189490 | -1.915052 |
| H | -1.227733 | -0.745076 | 2.036520  |
| O | -1.198547 | 1.881462  | 0.643824  |
| C | 1.759242  | -0.486413 | 0.297592  |
| H | 2.258600  | -0.887098 | 1.185417  |
| C | 2.609471  | 0.676357  | -0.212890 |
| H | 2.674208  | 1.480635  | 0.521018  |
| H | 3.622850  | 0.333972  | -0.427524 |
| H | 2.197158  | 1.092940  | -1.134596 |
| C | 1.757767  | -1.616668 | -0.732845 |
| H | 1.300407  | -2.524259 | -0.342285 |
| H | 1.242090  | -1.339166 | -1.652621 |
| H | 2.788766  | -1.859618 | -0.997024 |

ax4

```
=====
```

|   |           |           |           |
|---|-----------|-----------|-----------|
| C | -0.893035 | -0.720346 | -0.002722 |
| C | 0.396353  | -0.265848 | -0.670360 |
| H | 0.479852  | -0.875194 | -1.574325 |
| C | -1.193109 | -2.152986 | 0.059647  |
| C | 0.251033  | 1.194459  | -1.142378 |

|   |           |           |           |
|---|-----------|-----------|-----------|
| C | -0.363086 | 2.146473  | -0.113819 |
| H | -0.485828 | 3.131946  | -0.566555 |
| H | 0.302317  | 2.273190  | 0.742551  |
| C | -1.550244 | 0.225753  | 0.977508  |
| C | -1.712606 | 1.616729  | 0.365427  |
| H | -2.157589 | 2.293718  | 1.095677  |
| H | -2.399534 | 1.561030  | -0.484197 |
| H | -1.842607 | -2.528255 | 0.842413  |
| H | -0.484058 | -2.863621 | -0.350167 |
| H | 1.211263  | 1.573262  | -1.491886 |
| H | -2.515255 | -0.194205 | 1.264064  |
| H | -0.943357 | 0.303147  | 1.880196  |
| H | -0.410349 | 1.186764  | -2.014079 |
| O | -1.834767 | -1.321683 | -0.909430 |
| C | 1.664185  | -0.619235 | 0.147771  |
| H | 1.695688  | -1.712991 | 0.154812  |
| C | 1.690912  | -0.176835 | 1.611236  |
| H | 0.900923  | -0.648066 | 2.194953  |
| H | 2.643363  | -0.468421 | 2.058398  |
| H | 1.598092  | 0.904554  | 1.714698  |
| C | 2.928783  | -0.135705 | -0.561998 |
| H | 3.050100  | 0.944560  | -0.462857 |
| H | 3.810127  | -0.605718 | -0.123533 |
| H | 2.909871  | -0.377002 | -1.626598 |

eq1

```
=====
```

|   |           |           |           |
|---|-----------|-----------|-----------|
| C | -0.665630 | 0.860864  | -0.165218 |
| C | 0.339722  | -0.256170 | -0.403614 |
| H | 0.261110  | -0.475435 | -1.476126 |
| C | -0.410835 | 1.977692  | 0.755033  |
| C | -0.112958 | -1.517881 | 0.346837  |
| C | -1.540327 | -1.923965 | -0.013191 |
| H | -1.824409 | -2.819249 | 0.542084  |
| H | -1.592967 | -2.174183 | -1.077146 |
| C | -2.096545 | 0.478139  | -0.468961 |
| C | -2.511186 | -0.783900 | 0.285076  |
| H | -3.530202 | -1.060917 | 0.012404  |
| H | -2.508705 | -0.581285 | 1.360421  |
| H | 0.529361  | 2.054216  | 1.285077  |
| H | -1.254778 | 2.476969  | 1.217703  |
| H | 0.581315  | -2.333254 | 0.133935  |
| H | -2.750922 | 1.317753  | -0.232191 |
| H | -2.172057 | 0.294710  | -1.545610 |
| H | -0.066136 | -1.332444 | 1.423376  |
| O | -0.309078 | 2.153214  | -0.660046 |
| C | 1.809701  | 0.124356  | -0.125376 |
| H | 1.916069  | 1.187636  | -0.352684 |
| C | 2.740530  | -0.644071 | -1.064059 |
| H | 3.785044  | -0.400543 | -0.862355 |
| H | 2.620029  | -1.721916 | -0.930800 |
| H | 2.532657  | -0.408121 | -2.108573 |
| C | 2.250647  | -0.105508 | 1.322866  |
| H | 2.340428  | -1.172397 | 1.536500  |

|   |          |          |          |
|---|----------|----------|----------|
| H | 3.230010 | 0.346012 | 1.488630 |
| H | 1.558066 | 0.319406 | 2.049363 |

eq2

```
=====
C -0.576524    0.848158   -0.026334
C  0.350064   -0.339770   -0.257846
H  0.363464   -0.521429   -1.340919
C -0.511775    1.657817    1.196359
C -0.341428   -1.555953    0.382417
C -1.738868   -1.779431   -0.201434
H -2.212218   -2.633163    0.286214
H -1.636925   -2.034331   -1.260825
C -1.932476    0.684316   -0.670227
C -2.624592   -0.541765   -0.071881
H -3.586492   -0.707825   -0.558439
H -2.826698   -0.350141    0.986169
H  0.251980    1.479833    1.942409
H -1.421357    2.123890    1.558701
H  0.256702   -2.451760    0.221919
H -2.521899    1.587614   -0.509610
H -1.805872    0.551492   -1.748630
H -0.409109   -1.402140    1.464947
O -0.032475    2.167069   -0.052304
C  1.812175   -0.103460    0.172331
H  1.818617    0.464263    1.105478
C  2.555344    0.709059   -0.890720
H  3.557861    0.970555   -0.547621
H  2.660542    0.117045   -1.803794
H  2.026677    1.627186   -1.137441
C  2.575147   -1.405021    0.421291
H  2.180643   -1.964039    1.269098
H  2.537306   -2.051930   -0.458957
H  3.624184   -1.185376    0.626007
```

eq3

```
=====
C -0.355164    0.867572   -0.020050
C  0.195633   -0.459846   -0.526657
H  0.022798   -0.431547   -1.610382
C  0.248840    1.654203    1.065198
C -0.673066   -1.597666    0.038530
C -2.155715   -1.432310   -0.280351
H -2.722432   -2.264622    0.139995
H -2.303475   -1.455384   -1.364282
C -1.836077    1.046913   -0.286054
C -2.667163   -0.105111    0.271220
H -3.719151    0.041384    0.023422
H -2.590194   -0.114626    1.362695
H  1.170524    1.338048    1.533859
H -0.390882    2.288585    1.669045
H -0.300067   -2.548830   -0.348025
```



|   |           |           |           |
|---|-----------|-----------|-----------|
| H | -2.153361 | 2.004372  | 0.128391  |
| H | -1.974568 | 1.097255  | -1.371016 |
| H | -0.554793 | -1.628432 | 1.125434  |
| O | 0.385384  | 2.057950  | -0.297666 |
| C | 1.697343  | -0.788662 | -0.349209 |
| H | 1.848960  | -1.644594 | -1.014791 |
| C | 2.099988  | -1.271548 | 1.048425  |
| H | 3.175735  | -1.455126 | 1.071344  |
| H | 1.876390  | -0.542668 | 1.826921  |
| H | 1.604978  | -2.204579 | 1.315012  |
| C | 2.649964  | 0.306275  | -0.833305 |
| H | 2.337912  | 0.711144  | -1.796480 |
| H | 2.707800  | 1.135671  | -0.129698 |
| H | 3.653259  | -0.108576 | -0.946598 |

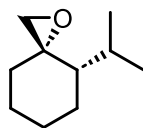

(3S,4S)-4-isopropyl-1-oxaspiro[2.5]octane

| Conformation | Electronic Energy | Enthalpy    | Gibbs Free Energy |
|--------------|-------------------|-------------|-------------------|
| ax1          | -467.047130       | -466.768898 | -466.816984       |
| ax2          | -467.042131       | -466.763551 | -466.811114       |
| ax3          | -467.040225       | -466.761664 | -466.809078       |
| ax4          | -467.040847       | -466.762171 | -466.81068        |
| ax5          | -467.040294       | -466.761691 | -466.809593       |
| eq1          | -467.044830       | -466.766559 | -466.81482        |
| eq2          | -467.045298       | -466.766817 | -466.814022       |
| eq3          | -467.042156       | -466.76372  | -466.811425       |

ax1

|   |           |           |           |
|---|-----------|-----------|-----------|
| C | -0.770897 | 0.755401  | 0.091715  |
| C | 0.417363  | -0.013462 | 0.637968  |
| H | 0.769931  | 0.513581  | 1.530684  |
| C | -1.588367 | 1.549666  | 1.015685  |
| C | -0.120337 | -1.396968 | 1.050862  |
| C | -0.796096 | -2.123543 | -0.115857 |
| H | -1.192632 | -3.079736 | 0.229074  |
| H | -0.058938 | -2.351688 | -0.889645 |
| C | -1.442283 | 0.121040  | -1.101394 |
| C | -1.924967 | -1.282545 | -0.717348 |
| H | -2.351867 | -1.782761 | -1.587383 |
| H | -2.725396 | -1.183715 | 0.022189  |
| H | -1.298697 | 1.620721  | 2.058036  |
| H | -2.640330 | 1.700866  | 0.801454  |

|   |           |           |           |
|---|-----------|-----------|-----------|
| H | 0.676832  | -2.008893 | 1.471476  |
| H | -2.276288 | 0.746286  | -1.421912 |
| H | -0.734621 | 0.060992  | -1.932672 |
| H | -0.857575 | -1.251606 | 1.846043  |
| O | -0.690198 | 2.180846  | 0.098636  |
| C | 1.601575  | -0.086954 | -0.347766 |
| H | 1.296214  | -0.664566 | -1.223309 |
| C | 2.798937  | -0.794926 | 0.286480  |
| H | 2.589290  | -1.838033 | 0.520779  |
| H | 3.654206  | -0.775165 | -0.390568 |
| H | 3.093868  | -0.292283 | 1.211551  |
| C | 2.020706  | 1.301317  | -0.830955 |
| H | 1.224952  | 1.799499  | -1.383095 |
| H | 2.286665  | 1.939362  | 0.015310  |
| H | 2.892167  | 1.226231  | -1.483425 |

ax2

```
=====
```

|   |           |           |           |
|---|-----------|-----------|-----------|
| C | -0.896959 | -0.752541 | 0.076735  |
| C | 0.400168  | -0.312684 | -0.581707 |
| H | 0.584018  | -1.038349 | -1.377956 |
| C | -1.721754 | -1.763258 | -0.599608 |
| C | 0.190458  | 1.057212  | -1.256997 |
| C | -0.560355 | 2.088702  | -0.405487 |
| H | -0.769785 | 2.966452  | -1.019589 |
| H | 0.059538  | 2.427574  | 0.424499  |
| C | -1.599127 | 0.249417  | 0.958474  |
| C | -1.865137 | 1.521600  | 0.152106  |
| H | -2.367453 | 2.263499  | 0.773818  |
| H | -2.541306 | 1.281506  | -0.674477 |
| H | -1.388051 | -2.183409 | -1.541117 |
| H | -2.790418 | -1.785426 | -0.418631 |
| H | 1.153948  | 1.460808  | -1.575333 |
| H | -2.528446 | -0.188042 | 1.325108  |
| H | -0.979892 | 0.481067  | 1.827562  |
| H | -0.392331 | 0.891550  | -2.167764 |
| O | -0.913728 | -2.105908 | 0.530860  |
| C | 1.635851  | -0.421923 | 0.347054  |
| H | 1.475493  | -1.308673 | 0.966500  |
| C | 1.898790  | 0.763691  | 1.276538  |
| H | 1.059252  | 0.989207  | 1.931188  |
| H | 2.760810  | 0.542819  | 1.908607  |
| H | 2.135862  | 1.662865  | 0.704212  |
| C | 2.887088  | -0.669176 | -0.498850 |
| H | 3.063652  | 0.165364  | -1.181996 |
| H | 3.770242  | -0.770228 | 0.133849  |
| H | 2.790544  | -1.577560 | -1.094907 |

ax3

```
=====
```

|   |           |          |           |
|---|-----------|----------|-----------|
| C | -0.502882 | 0.892931 | -0.039894 |
| C | 0.360316  | 0.018148 | 0.853998  |
| H | 0.564021  | 0.622938 | 1.741890  |
| C | -1.222491 | 2.015703 | 0.579562  |

|   |           |           |           |
|---|-----------|-----------|-----------|
| C | -0.497976 | -1.182737 | 1.302719  |
| C | -1.271264 | -1.880976 | 0.174539  |
| H | -1.942765 | -2.620644 | 0.614462  |
| H | -0.591177 | -2.426888 | -0.478219 |
| C | -1.171445 | 0.219468  | -1.212058 |
| C | -2.073238 | -0.894198 | -0.674119 |
| H | -2.563923 | -1.415740 | -1.496714 |
| H | -2.860252 | -0.441064 | -0.063553 |
| H | -1.082055 | 2.226253  | 1.633516  |
| H | -2.160060 | 2.347562  | 0.147894  |
| H | 0.133282  | -1.903693 | 1.827418  |
| H | -1.749633 | 0.959673  | -1.766508 |
| H | -0.424006 | -0.194492 | -1.891767 |
| H | -1.228036 | -0.816302 | 2.030313  |
| O | -0.071590 | 2.239707  | -0.236796 |
| C | 1.765251  | -0.368003 | 0.321498  |
| H | 2.315164  | -0.669666 | 1.218888  |
| C | 2.497273  | 0.832707  | -0.276962 |
| H | 2.480015  | 1.691192  | 0.394175  |
| H | 3.537550  | 0.573503  | -0.480603 |
| H | 2.036721  | 1.140904  | -1.217497 |
| C | 1.852936  | -1.555245 | -0.639521 |
| H | 1.480066  | -2.474176 | -0.189432 |
| H | 1.309018  | -1.381331 | -1.568090 |
| H | 2.899911  | -1.722460 | -0.900375 |

ax4

```
=====
```

|   |           |           |           |
|---|-----------|-----------|-----------|
| C | -0.916883 | -0.696874 | -0.059600 |
| C | 0.389508  | -0.245137 | -0.696070 |
| H | 0.507254  | -0.835700 | -1.608798 |
| C | -1.795634 | -1.598097 | -0.819309 |
| C | 0.246932  | 1.221402  | -1.151168 |
| C | -0.379665 | 2.163563  | -0.121321 |
| H | -0.502565 | 3.151337  | -0.569025 |
| H | 0.278583  | 2.287400  | 0.740646  |
| C | -1.566875 | 0.230121  | 0.944364  |
| C | -1.730535 | 1.627330  | 0.346538  |
| H | -2.179067 | 2.295878  | 1.082165  |
| H | -2.414096 | 1.579427  | -0.506921 |
| H | -1.494746 | -1.933572 | -1.804729 |
| H | -2.861479 | -1.592289 | -0.621684 |
| H | 1.212275  | 1.602868  | -1.483410 |
| H | -2.529881 | -0.190191 | 1.237011  |
| H | -0.953828 | 0.298449  | 1.843328  |
| H | -0.402678 | 1.223587  | -2.032073 |
| O | -0.988583 | -2.088835 | 0.254933  |
| C | 1.641769  | -0.608039 | 0.140873  |
| H | 1.659856  | -1.701061 | 0.148571  |
| C | 1.660178  | -0.164760 | 1.604108  |
| H | 0.867608  | -0.636252 | 2.183280  |
| H | 2.610287  | -0.457407 | 2.055903  |
| H | 1.568144  | 0.916654  | 1.708304  |
| C | 2.917448  | -0.137206 | -0.558105 |

|   |          |           |           |
|---|----------|-----------|-----------|
| H | 3.048445 | 0.942120  | -0.459553 |
| H | 3.790778 | -0.614702 | -0.111666 |
| H | 2.906315 | -0.379678 | -1.622663 |

ax5

```
=====
```

|   |           |           |           |
|---|-----------|-----------|-----------|
| C | 0.310448  | 0.930664  | 0.013883  |
| C | -0.353746 | -0.174400 | -0.795488 |
| H | -0.788485 | 0.307598  | -1.674251 |
| C | 0.464084  | 2.255313  | -0.605849 |
| C | 0.742775  | -1.121698 | -1.319734 |
| C | 1.729696  | -1.592479 | -0.251976 |
| H | 2.487049  | -2.228444 | -0.713361 |
| H | 1.218728  | -2.202080 | 0.496665  |
| C | 1.339600  | 0.524659  | 1.047333  |
| C | 2.392305  | -0.394177 | 0.425284  |
| H | 3.096483  | -0.721516 | 1.191006  |
| H | 2.964203  | 0.164967  | -0.321800 |
| H | 0.076167  | 2.427989  | -1.602820 |
| H | 1.281387  | 2.895154  | -0.293594 |
| H | 0.270862  | -1.973295 | -1.812730 |
| H | 1.798936  | 1.426903  | 1.453200  |
| H | 0.854404  | 0.008035  | 1.874801  |
| H | 1.311371  | -0.587350 | -2.087488 |
| O | -0.530965 | 2.022317  | 0.394289  |
| C | -1.541209 | -0.893150 | -0.098772 |
| H | -1.631674 | -1.868306 | -0.586706 |
| C | -2.844234 | -0.129895 | -0.353532 |
| H | -3.031260 | -0.011048 | -1.421884 |
| H | -3.693730 | -0.659342 | 0.081644  |
| H | -2.795816 | 0.864005  | 0.093240  |
| C | -1.406291 | -1.140556 | 1.404697  |
| H | -0.525627 | -1.725423 | 1.663543  |
| H | -1.363678 | -0.196021 | 1.950770  |
| H | -2.282175 | -1.686046 | 1.760380  |

eq1

```
=====
```

|   |           |           |           |
|---|-----------|-----------|-----------|
| C | -0.653344 | 0.822871  | -0.347599 |
| C | 0.354802  | -0.315354 | -0.435105 |
| H | 0.226093  | -0.723936 | -1.444434 |
| C | -0.292499 | 2.241481  | -0.433032 |
| C | -0.095595 | -1.405870 | 0.549762  |
| C | -1.512275 | -1.887824 | 0.229480  |
| H | -1.818143 | -2.653172 | 0.944674  |
| H | -1.514113 | -2.355255 | -0.760198 |
| C | -2.061324 | 0.393001  | -0.696055 |
| C | -2.509528 | -0.729931 | 0.241808  |
| H | -3.504655 | -1.077605 | -0.038791 |
| H | -2.582363 | -0.330330 | 1.257149  |
| H | -1.029587 | 2.947820  | -0.798527 |
| H | 0.741672  | 2.541944  | -0.547650 |
| H | 0.597531  | -2.247302 | 0.523378  |
| H | -2.729153 | 1.251928  | -0.620489 |

|   |           |           |           |
|---|-----------|-----------|-----------|
| H | -2.080129 | 0.042800  | -1.731478 |
| H | -0.073758 | -1.000903 | 1.565464  |
| O | -0.604792 | 1.645014  | 0.827949  |
| C | 1.842523  | 0.068686  | -0.322359 |
| H | 2.011407  | 0.889828  | -1.023265 |
| C | 2.733657  | -1.088890 | -0.779000 |
| H | 3.774314  | -0.765780 | -0.833885 |
| H | 2.688441  | -1.926916 | -0.081537 |
| H | 2.440910  | -1.452773 | -1.765509 |
| C | 2.276656  | 0.531576  | 1.069002  |
| H | 1.700050  | 1.386394  | 1.416357  |
| H | 2.158643  | -0.272558 | 1.798454  |
| H | 3.332731  | 0.807223  | 1.055279  |

eq2

```
=====
```

|   |           |           |           |
|---|-----------|-----------|-----------|
| C | 0.555969  | 0.874487  | 0.091499  |
| C | -0.357591 | -0.328647 | 0.306544  |
| H | -0.373481 | -0.517594 | 1.387075  |
| C | 0.079299  | 2.224740  | -0.230353 |
| C | 0.334024  | -1.535522 | -0.348169 |
| C | 1.735049  | -1.758958 | 0.225169  |
| H | 2.203878  | -2.614655 | -0.263556 |
| H | 1.644821  | -2.008385 | 1.287264  |
| C | 1.935119  | 0.705189  | 0.688002  |
| C | 2.614701  | -0.520024 | 0.075502  |
| H | 3.588401  | -0.681838 | 0.539804  |
| H | 2.791207  | -0.328533 | -0.986418 |
| H | 0.711011  | 3.069898  | 0.020495  |
| H | -0.977756 | 2.439732  | -0.312442 |
| H | -0.262777 | -2.433906 | -0.196610 |
| H | 2.521538  | 1.606645  | 0.506989  |
| H | 1.839838  | 0.577537  | 1.769637  |
| H | 0.397344  | -1.368050 | -1.428305 |
| O | 0.593901  | 1.373088  | -1.254525 |
| C | -1.811273 | -0.080857 | -0.141804 |
| H | -1.781733 | 0.538279  | -1.042864 |
| C | -2.581861 | 0.660593  | 0.954377  |
| H | -3.545311 | 1.016987  | 0.586399  |
| H | -2.773747 | -0.016490 | 1.790655  |
| H | -2.030307 | 1.515359  | 1.345450  |
| C | -2.568130 | -1.361772 | -0.493083 |
| H | -2.143965 | -1.868823 | -1.358877 |
| H | -2.563263 | -2.060654 | 0.346892  |
| H | -3.608747 | -1.125585 | -0.721493 |

eq3

```
=====
```

|   |           |           |           |
|---|-----------|-----------|-----------|
| C | -0.344149 | 0.826656  | -0.209270 |
| C | 0.231674  | -0.570947 | -0.399516 |
| H | 0.072196  | -0.804732 | -1.458707 |
| C | 0.439280  | 2.057523  | -0.051201 |
| C | -0.655921 | -1.538529 | 0.402269  |
| C | -2.115055 | -1.472441 | -0.050290 |

|   |           |           |           |
|---|-----------|-----------|-----------|
| H | -2.723825 | -2.156633 | 0.543153  |
| H | -2.179749 | -1.806138 | -1.090691 |
| C | -1.774414 | 0.939515  | -0.695420 |
| C | -2.664089 | -0.051061 | 0.057613  |
| H | -3.684841 | -0.003479 | -0.324109 |
| H | -2.699813 | 0.241403  | 1.110630  |
| H | -0.013937 | 2.999192  | -0.341784 |
| H | 1.519735  | 2.039640  | -0.060926 |
| H | -0.273482 | -2.554640 | 0.288252  |
| H | -2.123518 | 1.962054  | -0.547309 |
| H | -1.803456 | 0.727203  | -1.767457 |
| H | -0.593404 | -1.286603 | 1.464850  |
| O | -0.159698 | 1.427270  | 1.081227  |
| C | 1.731363  | -0.812745 | -0.136903 |
| H | 1.836778  | -1.900995 | -0.188632 |
| C | 2.235428  | -0.398436 | 1.247513  |
| H | 3.237327  | -0.802333 | 1.404724  |
| H | 2.291750  | 0.683228  | 1.359322  |
| H | 1.592993  | -0.779856 | 2.041082  |
| C | 2.623641  | -0.251340 | -1.245833 |
| H | 2.596543  | 0.836632  | -1.293841 |
| H | 3.661481  | -0.546615 | -1.081103 |
| H | 2.318263  | -0.634653 | -2.221036 |

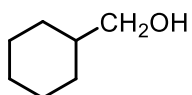

cyclohexylmethanol

| Conformation | Electronic Energy | Enthalpy    | Gibbs Free Energy |
|--------------|-------------------|-------------|-------------------|
| ax           | -350.362673       | -350.149083 | -350.190686       |
| ax2          | -350.363120       | -350.149386 | -350.19067        |
| ax3          | -350.363213       | -350.14958  | -350.191004       |
| ax4          | -350.359268       | -350.14555  | -350.186883       |
| ax5          | -350.359268       | -350.145549 | -350.186879       |
| ax6          | -350.359160       | -350.145562 | -350.187037       |
| eq           | -350.365104       | -350.151839 | -350.193555       |
| eq2          | -350.365742       | -350.152367 | -350.193884       |
| eq3          | -350.365532       | -350.152194 | -350.193769       |
| eq4          | -350.365058       | -350.151638 | -350.193131       |
| eq5          | -350.365058       | -350.151637 | -350.193128       |
| eq6          | -350.364362       | -350.151039 | -350.192627       |

ax

|   |           |           |          |
|---|-----------|-----------|----------|
| C | -0.562331 | -1.362016 | 0.586154 |
| C | 0.601862  | -0.367065 | 0.688176 |

|   |           |           |           |
|---|-----------|-----------|-----------|
| H | 1.182215  | -0.607139 | 1.583525  |
| C | 0.069912  | 1.065896  | 0.827506  |
| C | -0.925162 | 1.432755  | -0.275477 |
| H | -0.417753 | 1.452205  | -1.244215 |
| H | -1.307885 | 2.440464  | -0.104276 |
| C | -1.560855 | -0.995138 | -0.514828 |
| C | -2.079038 | 0.431370  | -0.331510 |
| H | -2.643869 | 0.486942  | 0.604961  |
| H | -2.769427 | 0.690299  | -1.136259 |
| C | 1.552675  | -0.519937 | -0.489659 |
| H | 1.062111  | -0.254864 | -1.429544 |
| H | 0.904444  | 1.767758  | 0.838001  |
| H | -2.391928 | -1.702629 | -0.506070 |
| H | -1.084986 | -1.083057 | -1.495414 |
| H | -0.434489 | 1.152063  | 1.794663  |
| H | 1.870662  | -1.565039 | -0.560436 |
| O | 2.682505  | 0.323618  | -0.276535 |
| H | 3.254819  | 0.261687  | -1.046334 |
| H | -1.090341 | -1.371333 | 1.543989  |
| H | -0.175990 | -2.371485 | 0.427524  |

ax2

```
=====
```

|   |           |           |           |
|---|-----------|-----------|-----------|
| C | -0.573618 | -1.370569 | 0.573765  |
| C | 0.604247  | -0.392226 | 0.690620  |
| H | 1.180177  | -0.649049 | 1.583833  |
| C | 0.084235  | 1.043226  | 0.848673  |
| C | -0.893549 | 1.438802  | -0.259537 |
| H | -0.378945 | 1.455593  | -1.224890 |
| H | -1.259824 | 2.451541  | -0.083268 |
| C | -1.568716 | -0.976597 | -0.521653 |
| C | -2.063405 | 0.456883  | -0.328256 |
| H | -2.630201 | 0.515608  | 0.606759  |
| H | -2.746227 | 0.733712  | -1.133358 |
| C | 1.554985  | -0.547834 | -0.493533 |
| H | 1.052961  | -0.325070 | -1.438304 |
| H | 0.917132  | 1.748943  | 0.896144  |
| H | -2.411728 | -1.669799 | -0.515474 |
| H | -1.098276 | -1.065662 | -1.504411 |
| H | -0.430672 | 1.116496  | 1.811054  |
| H | 1.898257  | -1.581933 | -0.542196 |
| O | 2.732259  | 0.245166  | -0.372780 |
| H | 2.484162  | 1.169830  | -0.464171 |
| H | -1.101239 | -1.389921 | 1.531683  |
| H | -0.198722 | -2.381738 | 0.398363  |

ax3

```
=====
```

|   |           |           |           |
|---|-----------|-----------|-----------|
| C | -0.544516 | -1.361094 | 0.591712  |
| C | 0.612659  | -0.355938 | 0.671215  |
| H | 1.206391  | -0.591608 | 1.561361  |
| C | 0.074612  | 1.073660  | 0.814719  |
| C | -0.942309 | 1.428980  | -0.272198 |
| H | -0.451391 | 1.449575  | -1.249258 |

|   |           |           |           |
|---|-----------|-----------|-----------|
| H | -1.330049 | 2.434067  | -0.097247 |
| C | -1.560719 | -1.004032 | -0.496158 |
| C | -2.088470 | 0.418031  | -0.306509 |
| H | -2.638350 | 0.470490  | 0.638992  |
| H | -2.793976 | 0.669681  | -1.100338 |
| C | 1.548945  | -0.508335 | -0.524196 |
| H | 1.051670  | -0.237440 | -1.454820 |
| H | 0.904752  | 1.781428  | 0.805025  |
| H | -2.385134 | -1.718951 | -0.476342 |
| H | -1.096710 | -1.087953 | -1.482832 |
| H | -0.411624 | 1.163328  | 1.790729  |
| H | 1.857809  | -1.555557 | -0.608949 |
| O | 2.692022  | 0.336290  | -0.444285 |
| H | 3.159312  | 0.125749  | 0.370548  |
| H | -1.058584 | -1.373393 | 1.557059  |
| H | -0.151498 | -2.367362 | 0.428841  |

ax4

```
=====
```

|   |           |           |           |
|---|-----------|-----------|-----------|
| C | -0.153966 | -1.219768 | 0.869611  |
| C | 0.691980  | 0.062443  | 0.957475  |
| H | 1.089047  | 0.112905  | 1.976660  |
| C | -0.171755 | 1.315262  | 0.743367  |
| C | -1.094141 | 1.233608  | -0.475064 |
| H | -0.497523 | 1.208183  | -1.388520 |
| H | -1.719167 | 2.127761  | -0.518195 |
| C | -1.106492 | -1.275590 | -0.329962 |
| C | -1.968346 | -0.017194 | -0.410136 |
| H | -2.607103 | 0.036226  | 0.477976  |
| H | -2.629847 | -0.066817 | -1.276787 |
| C | 1.948534  | 0.030961  | 0.091795  |
| H | 2.573002  | -0.813815 | 0.400854  |
| H | 0.473925  | 2.194094  | 0.674403  |
| H | -1.738211 | -2.161710 | -0.243374 |
| H | -0.553824 | -1.383334 | -1.266311 |
| H | -0.797193 | 1.453105  | 1.631014  |
| H | 2.520499  | 0.943803  | 0.265496  |
| O | 1.733863  | -0.019861 | -1.315975 |
| H | 1.399948  | -0.893228 | -1.538564 |
| H | -0.763133 | -1.283515 | 1.776073  |
| H | 0.503784  | -2.093098 | 0.874548  |

ax5

```
=====
```

|   |           |           |           |
|---|-----------|-----------|-----------|
| C | -0.172002 | -1.315520 | 0.743168  |
| C | 0.692051  | -0.063088 | 0.957604  |
| H | 1.089356  | -0.114078 | 1.976720  |
| C | -0.153725 | 1.219263  | 0.870344  |
| C | -1.106324 | 1.275824  | -0.329161 |
| H | -0.553599 | 1.384165  | -1.265358 |
| H | -1.738173 | 2.161804  | -0.241986 |
| C | -1.093681 | -1.233348 | -0.475734 |
| C | -1.968023 | 0.017377  | -0.410404 |
| H | -2.607131 | -0.036650 | 0.477406  |



|   |           |           |           |
|---|-----------|-----------|-----------|
| H | -2.629164 | 0.067463  | -1.277311 |
| C | 1.948282  | -0.031440 | 0.091473  |
| H | 2.519765  | -0.944813 | 0.263965  |
| H | 0.504120  | 2.092525  | 0.875625  |
| H | -1.718586 | -2.127536 | -0.519822 |
| H | -0.496515 | -1.207240 | -1.388828 |
| H | -0.762860 | 1.282705  | 1.776863  |
| H | 2.573385  | 0.812603  | 0.401195  |
| O | 1.732955  | 0.020894  | -1.316178 |
| H | 1.400922  | 0.895214  | -1.537823 |
| H | -0.797957 | -1.453106 | 1.630515  |
| H | 0.473328  | -2.194615 | 0.674520  |

ax6

```
=====
```

|   |           |           |           |
|---|-----------|-----------|-----------|
| C | 0.175503  | 1.268034  | 0.814252  |
| C | -0.679853 | 0.000108  | 0.969797  |
| H | -1.073491 | 0.000169  | 1.991055  |
| C | 0.175507  | -1.267789 | 0.814496  |
| C | 1.089716  | -1.257325 | -0.413262 |
| H | 0.486181  | -1.292342 | -1.321143 |
| H | 1.719234  | -2.149573 | -0.403364 |
| C | 1.089770  | 1.257208  | -0.413492 |
| C | 1.957649  | -0.000077 | -0.437459 |
| H | 2.616280  | -0.000035 | 0.437996  |
| H | 2.600865  | -0.000126 | -1.319510 |
| C | -1.934182 | 0.000041  | 0.109013  |
| H | -2.530145 | 0.885576  | 0.353509  |
| H | -0.474956 | -2.145774 | 0.797412  |
| H | 1.719331  | 2.149438  | -0.403842 |
| H | 0.486235  | 1.292027  | -1.321367 |
| H | 0.805416  | -1.360149 | 1.704922  |
| H | -2.530276 | -0.885354 | 0.353661  |
| O | -1.619163 | -0.000167 | -1.282283 |
| H | -2.446407 | -0.000325 | -1.772622 |
| H | 0.805375  | 1.360628  | 1.704654  |
| H | -0.474994 | 2.145977  | 0.796834  |

eq

```
=====
```

|   |           |           |           |
|---|-----------|-----------|-----------|
| C | 0.376288  | -1.355224 | 0.162549  |
| C | -0.580105 | -0.233701 | -0.249652 |
| H | -0.608486 | -0.190945 | -1.344936 |
| C | -0.079585 | 1.114487  | 0.272932  |
| C | 1.350028  | 1.400915  | -0.185991 |
| H | 1.363529  | 1.497682  | -1.276343 |
| H | 1.691132  | 2.354396  | 0.221207  |
| C | 1.807237  | -1.072958 | -0.294642 |
| C | 2.298784  | 0.276559  | 0.227615  |
| H | 2.353441  | 0.238865  | 1.320397  |
| H | 3.308111  | 0.477806  | -0.135714 |
| C | -1.983219 | -0.540321 | 0.236637  |
| H | -1.995010 | -0.548841 | 1.332540  |
| H | -0.109705 | 1.093510  | 1.368735  |

|   |           |           |           |
|---|-----------|-----------|-----------|
| H | 2.471196  | -1.873132 | 0.036961  |
| H | 1.837651  | -1.065787 | -1.388742 |
| H | -0.751492 | 1.909984  | -0.050502 |
| H | -2.287004 | -1.531995 | -0.113200 |
| O | -2.879781 | 0.450667  | -0.258325 |
| H | -3.761167 | 0.251185  | 0.069444  |
| H | 0.359685  | -1.448646 | 1.254309  |
| H | 0.029804  | -2.307963 | -0.244250 |

eq2

```
=====
```

|   |           |           |           |
|---|-----------|-----------|-----------|
| C | 0.381079  | -1.355447 | 0.166296  |
| C | -0.582016 | -0.245782 | -0.262226 |
| H | -0.606744 | -0.212113 | -1.357648 |
| C | -0.093215 | 1.110418  | 0.251906  |
| C | 1.339306  | 1.402543  | -0.196102 |
| H | 1.360830  | 1.490221  | -1.286886 |
| H | 1.669623  | 2.361497  | 0.206653  |
| C | 1.813717  | -1.068405 | -0.282284 |
| C | 2.291267  | 0.287834  | 0.234925  |
| H | 2.336177  | 0.258457  | 1.328345  |
| H | 3.302101  | 0.494536  | -0.120860 |
| C | -1.987415 | -0.563760 | 0.225853  |
| H | -1.993423 | -0.604510 | 1.321346  |
| H | -0.135926 | 1.104019  | 1.347525  |
| H | 2.480061  | -1.861667 | 0.060810  |
| H | 1.853145  | -1.068713 | -1.376047 |
| H | -0.753688 | 1.910209  | -0.091709 |
| H | -2.294705 | -1.542897 | -0.143507 |
| O | -2.974424 | 0.351152  | -0.237483 |
| H | -2.798362 | 1.210497  | 0.156720  |
| H | 0.357464  | -1.439246 | 1.258741  |
| H | 0.042498  | -2.313914 | -0.233829 |

eq3

```
=====
```

|   |           |           |           |
|---|-----------|-----------|-----------|
| C | 0.373671  | -1.355074 | 0.162440  |
| C | -0.584884 | -0.230772 | -0.236917 |
| H | -0.618145 | -0.185731 | -1.333820 |
| C | -0.078405 | 1.114526  | 0.285203  |
| C | 1.347025  | 1.401460  | -0.186224 |
| H | 1.350788  | 1.501299  | -1.276411 |
| H | 1.692900  | 2.353332  | 0.220635  |
| C | 1.801472  | -1.073233 | -0.305090 |
| C | 2.298305  | 0.274927  | 0.215849  |
| H | 2.362719  | 0.234653  | 1.307957  |
| H | 3.304497  | 0.476316  | -0.155975 |
| C | -1.988784 | -0.540142 | 0.259462  |
| H | -1.999950 | -0.542173 | 1.351443  |
| H | -0.098071 | 1.089190  | 1.381047  |
| H | 2.467472  | -1.874427 | 0.019876  |
| H | 1.823386  | -1.064178 | -1.399399 |
| H | -0.752795 | 1.912710  | -0.027328 |
| H | -2.290299 | -1.537119 | -0.078312 |

|   |           |           |           |
|---|-----------|-----------|-----------|
| O | -2.956819 | 0.425584  | -0.136239 |
| H | -2.985347 | 0.438908  | -1.098211 |
| H | 0.364631  | -1.451384 | 1.254095  |
| H | 0.022360  | -2.306224 | -0.244024 |

eq4

```
=====
```

|   |           |           |           |
|---|-----------|-----------|-----------|
| C | -0.036024 | 1.249296  | -0.022867 |
| C | 0.566133  | -0.026708 | -0.618162 |
| H | 0.327362  | -0.040570 | -1.688646 |
| C | -0.059319 | -1.266268 | 0.024729  |
| C | -1.583082 | -1.255351 | -0.099410 |
| H | -1.857300 | -1.319341 | -1.157291 |
| H | -2.007146 | -2.132545 | 0.392524  |
| C | -1.559585 | 1.263560  | -0.152134 |
| C | -2.176651 | 0.022757  | 0.492295  |
| H | -1.979717 | 0.043941  | 1.569016  |
| H | -3.260716 | 0.030681  | 0.366037  |
| C | 2.086577  | -0.038362 | -0.525169 |
| H | 2.496616  | 0.818044  | -1.070357 |
| H | 0.217850  | -1.291813 | 1.082607  |
| H | -1.967127 | 2.169024  | 0.300703  |
| H | -1.827921 | 1.287636  | -1.212980 |
| H | 0.353134  | -2.167371 | -0.435762 |
| H | 2.477295  | -0.946009 | -0.986899 |
| O | 2.579750  | -0.046413 | 0.811275  |
| H | 2.343044  | 0.789104  | 1.224761  |
| H | 0.221218  | 1.310490  | 1.040626  |
| H | 0.397114  | 2.126484  | -0.510227 |

eq5

```
=====
```

|   |           |           |           |
|---|-----------|-----------|-----------|
| C | -0.059318 | 1.266227  | 0.024807  |
| C | 0.566118  | 0.026722  | -0.618077 |
| H | 0.327300  | 0.040596  | -1.688569 |
| C | -0.036041 | -1.249341 | -0.022855 |
| C | -1.559587 | -1.263552 | -0.152066 |
| H | -1.827949 | -1.287722 | -1.212900 |
| H | -1.967150 | -2.168973 | 0.300857  |
| C | -1.583103 | 1.255363  | -0.099514 |
| C | -2.176668 | -0.022708 | 0.492259  |
| H | -1.979769 | -0.043795 | 1.568990  |
| H | -3.260729 | -0.030704 | 0.365981  |
| C | 2.086568  | 0.038326  | -0.525181 |
| H | 2.477219  | 0.945924  | -0.987065 |
| H | 0.221282  | -1.310626 | 1.040612  |
| H | -2.007183 | 2.132608  | 0.392309  |
| H | -1.857204 | 1.319256  | -1.157429 |
| H | 0.397073  | -2.126456 | -0.510358 |
| H | 2.496491  | -0.818137 | -1.070377 |
| O | 2.579939  | 0.046421  | 0.811170  |
| H | 2.342442  | -0.788677 | 1.225052  |
| H | 0.217600  | 1.291727  | 1.082760  |
| H | 0.353253  | 2.167395  | -0.435463 |

eq6

|   |           |           |           |
|---|-----------|-----------|-----------|
| C | 0.050581  | 1.258179  | -0.003431 |
| C | -0.561513 | -0.000042 | 0.617881  |
| H | -0.321062 | -0.000018 | 1.687786  |
| C | 0.050606  | -1.258229 | -0.003437 |
| C | 1.574128  | -1.259643 | 0.122880  |
| H | 1.846717  | -1.303434 | 1.182292  |
| H | 1.990218  | -2.151271 | -0.349614 |
| C | 1.574107  | 1.259676  | 0.122978  |
| C | 2.179600  | 0.000038  | -0.495768 |
| H | 1.981860  | 0.000090  | -1.572530 |
| H | 3.263875  | 0.000017  | -0.370366 |
| C | -2.077023 | -0.000043 | 0.527265  |
| H | -2.474862 | 0.886437  | 1.031569  |
| H | -0.224775 | -1.298312 | -1.060942 |
| H | 1.990192  | 2.151345  | -0.349438 |
| H | 1.846652  | 1.303384  | 1.182405  |
| H | -0.371781 | -2.146974 | 0.472099  |
| H | -2.474886 | -0.886611 | 1.031406  |
| O | -2.470891 | 0.000067  | -0.843315 |
| H | -3.431302 | 0.000068  | -0.879422 |
| H | -0.224697 | 1.298222  | -1.060965 |
| H | -0.371928 | 2.146910  | 0.472027  |

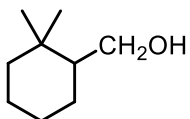

(2,2-dimethylcyclohexyl)methanol

| Conformation | Electronic Energy | Enthalpy    | Gibbs Free Energy |
|--------------|-------------------|-------------|-------------------|
| ax           | -428.975688       | -428.703174 | -428.749743       |
| ax2          | -428.975962       | -428.70347  | -428.750112       |
| ax3          | -428.976253       | -428.703661 | -428.750125       |
| ax4          | -428.975668       | -428.703108 | -428.749013       |
| ax5          | -428.973366       | -428.700907 | -428.747193       |
| ax6          | -428.975133       | -428.702808 | -428.749198       |
| ax7          | -428.973490       | -428.701006 | -428.74727        |
| ax8          | -428.974644       | -428.702362 | -428.748681       |
| ax9          | -428.973397       | -428.70091  | -428.74715        |
| eq           | -428.977615       | -428.705533 | -428.752741       |
| eq2          | -428.978034       | -428.705818 | -428.75299        |

|     |  |             |  |             |  |             |
|-----|--|-------------|--|-------------|--|-------------|
| eq3 |  | -428.978025 |  | -428.705901 |  | -428.753052 |
| eq4 |  | -428.976402 |  | -428.704209 |  | -428.751274 |
| eq5 |  | -428.976498 |  | -428.704212 |  | -428.750805 |
| eq6 |  | -428.975871 |  | -428.703572 |  | -428.750785 |
| eq7 |  | -428.976588 |  | -428.704324 |  | -428.751142 |
| eq8 |  | -428.975575 |  | -428.703435 |  | -428.750798 |
| eq9 |  | -428.975628 |  | -428.703513 |  | -428.750707 |

ax

```
=====
```

|   |           |           |           |
|---|-----------|-----------|-----------|
| C | -0.720055 | 1.079809  | 0.970056  |
| C | -0.544817 | -0.391307 | 0.559152  |
| H | -0.708284 | -1.013765 | 1.445705  |
| C | 0.898162  | -0.674259 | 0.055525  |
| C | 1.303894  | 0.348590  | -1.023833 |
| H | 0.711801  | 0.166058  | -1.925455 |
| H | 2.347676  | 0.169061  | -1.295927 |
| C | -0.330882 | 2.047323  | -0.147620 |
| C | 1.108284  | 1.803651  | -0.598407 |
| H | 1.788827  | 2.048732  | 0.221440  |
| H | 1.365353  | 2.465387  | -1.427605 |
| C | -1.604729 | -0.806475 | -0.458732 |
| H | -1.563286 | -1.885206 | -0.616398 |
| H | -0.452754 | 3.076416  | 0.194936  |
| H | -1.003969 | 1.917853  | -1.000488 |
| H | -1.435414 | -0.318080 | -1.422831 |
| O | -2.891977 | -0.451924 | 0.045934  |
| H | -3.553164 | -0.801721 | -0.557710 |
| H | -0.101305 | 1.284869  | 1.846090  |
| H | -1.753793 | 1.244491  | 1.271010  |
| C | 1.870514  | -0.599068 | 1.240081  |
| H | 1.624967  | -1.363543 | 1.980510  |
| H | 2.892005  | -0.778702 | 0.898138  |
| H | 1.854275  | 0.367210  | 1.741306  |
| C | 1.013395  | -2.081659 | -0.538683 |
| H | 0.645690  | -2.835763 | 0.161519  |
| H | 0.455150  | -2.180047 | -1.470425 |
| H | 2.059441  | -2.307478 | -0.756516 |

ax2

```
=====
```

|   |           |           |           |
|---|-----------|-----------|-----------|
| C | -0.720177 | 1.086614  | 0.960086  |
| C | -0.561598 | -0.382606 | 0.537342  |
| H | -0.746922 | -1.012313 | 1.416811  |
| C | 0.885676  | -0.685430 | 0.057347  |
| C | 1.320512  | 0.338470  | -1.009180 |
| H | 0.733557  | 0.173838  | -1.917753 |
| H | 2.363420  | 0.142388  | -1.272954 |
| C | -0.294165 | 2.059268  | -0.139872 |
| C | 1.146439  | 1.792916  | -0.572730 |
| H | 1.820505  | 2.017703  | 0.258177  |
| H | 1.426544  | 2.457514  | -1.392063 |
| C | -1.616696 | -0.773911 | -0.502182 |

|   |           |           |           |
|---|-----------|-----------|-----------|
| H | -1.567420 | -1.846152 | -0.698222 |
| H | -0.401272 | 3.086235  | 0.213712  |
| H | -0.956322 | 1.953926  | -1.004335 |
| H | -1.450765 | -0.257491 | -1.447597 |
| O | -2.941367 | -0.428143 | -0.106100 |
| H | -3.125488 | -0.869474 | 0.729532  |
| H | -0.117703 | 1.274152  | 1.851149  |
| H | -1.757457 | 1.267919  | 1.240870  |
| C | 1.839939  | -0.631458 | 1.257749  |
| H | 1.573950  | -1.399852 | 1.987061  |
| H | 2.864641  | -0.820129 | 0.930465  |
| H | 1.826893  | 0.330209  | 1.767693  |
| C | 0.992236  | -2.090977 | -0.543567 |
| H | 0.596070  | -2.843749 | 0.142478  |
| H | 0.455943  | -2.175298 | -1.489195 |
| H | 2.039770  | -2.331596 | -0.736974 |

ax3

```
=====
```

|   |           |           |           |
|---|-----------|-----------|-----------|
| C | -0.761600 | 1.033242  | 0.982089  |
| C | -0.524286 | -0.426735 | 0.564856  |
| H | -0.656427 | -1.059063 | 1.449458  |
| C | 0.929862  | -0.636084 | 0.056195  |
| C | 1.276777  | 0.404840  | -1.026805 |
| H | 0.692979  | 0.189527  | -1.926426 |
| H | 2.327722  | 0.281156  | -1.302245 |
| C | -0.439373 | 2.019708  | -0.140781 |
| C | 1.006705  | 1.848999  | -0.603893 |
| H | 1.679146  | 2.132479  | 0.210121  |
| H | 1.221494  | 2.520908  | -1.436758 |
| C | -1.564917 | -0.892591 | -0.459903 |
| H | -1.483731 | -1.967619 | -0.604443 |
| H | -0.611084 | 3.041245  | 0.202229  |
| H | -1.112288 | 1.855168  | -0.988425 |
| H | -1.403004 | -0.417332 | -1.431369 |
| O | -2.907148 | -0.678530 | -0.033143 |
| H | -3.078589 | 0.267637  | -0.030657 |
| H | -0.136709 | 1.266221  | 1.846274  |
| H | -1.790733 | 1.160351  | 1.323338  |
| C | 1.905047  | -0.511325 | 1.234145  |
| H | 1.697600  | -1.280901 | 1.980923  |
| H | 2.931039  | -0.649056 | 0.886229  |
| H | 1.851078  | 0.456772  | 1.729309  |
| C | 1.109934  | -2.037432 | -0.536708 |
| H | 0.783144  | -2.806761 | 0.167255  |
| H | 0.552232  | -2.165196 | -1.465076 |
| H | 2.164422  | -2.213022 | -0.759765 |

ax4

```
=====
```

|   |           |           |          |
|---|-----------|-----------|----------|
| C | -0.723641 | -1.305805 | 1.002997 |
| C | 0.480659  | -0.425793 | 0.629573 |
| H | 1.061371  | -0.238275 | 1.538514 |
| C | 0.019818  | 0.950066  | 0.072327 |

|   |           |           |           |
|---|-----------|-----------|-----------|
| C | -1.003017 | 0.751161  | -1.062779 |
| H | -0.491422 | 0.315265  | -1.926431 |
| H | -1.364969 | 1.732743  | -1.380421 |
| C | -1.676550 | -1.502999 | -0.176005 |
| C | -2.176533 | -0.153261 | -0.687655 |
| H | -2.783786 | 0.321813  | 0.087534  |
| H | -2.825004 | -0.290636 | -1.554705 |
| C | 1.419907  | -1.192913 | -0.312579 |
| H | 1.146251  | -1.040981 | -1.360432 |
| H | -2.516282 | -2.132538 | 0.122909  |
| H | -1.159147 | -2.027805 | -0.985620 |
| H | 1.340453  | -2.261435 | -0.110878 |
| O | 2.799435  | -0.887003 | -0.120739 |
| H | 2.943472  | 0.034881  | -0.349844 |
| H | -1.273750 | -0.849565 | 1.828462  |
| H | -0.360157 | -2.269641 | 1.364584  |
| C | -0.600452 | 1.780040  | 1.203334  |
| H | 0.134061  | 1.953128  | 1.993003  |
| H | -0.921136 | 2.752799  | 0.824308  |
| H | -1.466584 | 1.298435  | 1.654126  |
| C | 1.202116  | 1.749112  | -0.484041 |
| H | 1.975975  | 1.896328  | 0.274120  |
| H | 1.645004  | 1.266554  | -1.359092 |
| H | 0.866330  | 2.737310  | -0.805255 |

ax5

```
=====
```

|   |           |           |           |
|---|-----------|-----------|-----------|
| C | 0.942790  | -0.883467 | 1.207104  |
| C | 0.271362  | 0.470849  | 0.905668  |
| H | -0.074574 | 0.869519  | 1.867253  |
| C | -0.993738 | 0.313068  | 0.015886  |
| C | -0.715953 | -0.602016 | -1.192697 |
| H | -0.024602 | -0.089859 | -1.865267 |
| H | -1.652657 | -0.743629 | -1.739374 |
| C | 1.172476  | -1.771376 | -0.019027 |
| C | -0.119831 | -1.955378 | -0.810757 |
| H | -0.833488 | -2.524036 | -0.208533 |
| H | 0.069052  | -2.543440 | -1.710661 |
| C | 1.271138  | 1.528330  | 0.434152  |
| H | 2.098621  | 1.564013  | 1.150312  |
| H | 1.558874  | -2.739230 | 0.306162  |
| H | 1.936713  | -1.346834 | -0.676098 |
| H | 0.799482  | 2.509713  | 0.442213  |
| O | 1.781179  | 1.367180  | -0.886682 |
| H | 2.354231  | 0.595983  | -0.900042 |
| H | 0.314227  | -1.440249 | 1.906045  |
| H | 1.888226  | -0.702259 | 1.724406  |
| C | -2.122133 | -0.285662 | 0.868337  |
| H | -2.407483 | 0.409648  | 1.660661  |
| H | -3.004097 | -0.474049 | 0.252103  |
| H | -1.838100 | -1.226117 | 1.339296  |
| C | -1.475314 | 1.670338  | -0.500962 |
| H | -1.633470 | 2.372706  | 0.321114  |
| H | -0.759536 | 2.110633  | -1.196063 |

H -2.425626 1.551938 -1.026301

ax6

```
=====
C -0.705298 -1.305950 1.009006
C 0.488398 -0.416266 0.624742
H 1.069519 -0.219860 1.533990
C 0.014700 0.954719 0.068625
C -1.010110 0.741973 -1.062559
H -0.496628 0.311381 -1.927723
H -1.383855 1.719096 -1.380229
C -1.660798 -1.516313 -0.165743
C -2.173846 -0.173631 -0.683006
H -2.785872 0.298335 0.090298
H -2.821572 -0.321766 -1.548923
C 1.422566 -1.182694 -0.321360
H 1.131244 -1.051131 -1.363312
H -2.494179 -2.151360 0.139298
H -1.141708 -2.041332 -0.974088
H 1.359822 -2.253041 -0.100527
O 2.781828 -0.763032 -0.249032
H 3.071887 -0.861340 0.663098
H -1.255348 -0.851354 1.835204
H -0.332489 -2.265682 1.372292
C -0.615147 1.777511 1.200182
H 0.114790 1.951082 1.994096
H -0.936428 2.750699 0.822623
H -1.482644 1.293157 1.645630
C 1.187153 1.764808 -0.489611
H 1.951643 1.929166 0.272108
H 1.661265 1.263505 -1.333062
H 0.830218 2.739758 -0.830172
```

ax7

```
=====
C 0.911052 -0.915484 1.207634
C 0.292891 0.461799 0.905135
H -0.039021 0.884158 1.861476
C -0.982539 0.348584 0.020161
C -0.761277 -0.589501 -1.183910
H -0.086778 -0.116328 -1.902775
H -1.717660 -0.714303 -1.699457
C 1.122406 -1.786765 -0.031924
C -0.184087 -1.951676 -0.803880
H -0.902273 -2.503082 -0.190937
H -0.021007 -2.544792 -1.705555
C 1.340679 1.469015 0.428464
H 2.154737 1.480231 1.154630
H 1.508349 -2.762470 0.269994
H 1.868517 -1.326702 -0.681706
H 0.912519 2.474291 0.411872
O 1.958236 1.186003 -0.824343
H 1.312366 1.332707 -1.521374
H 0.258029 -1.455357 1.897967
```



|   |           |           |           |
|---|-----------|-----------|-----------|
| H | 1.858523  | -0.768471 | 1.731375  |
| C | -2.127575 | -0.202138 | 0.883375  |
| H | -2.370345 | 0.500538  | 1.683118  |
| H | -3.024414 | -0.345597 | 0.276867  |
| H | -1.880464 | -1.157663 | 1.344219  |
| C | -1.421934 | 1.720360  | -0.497772 |
| H | -1.549989 | 2.429810  | 0.322842  |
| H | -0.706554 | 2.148138  | -1.203712 |
| H | -2.378115 | 1.631702  | -1.017791 |

ax8

```
=====
```

|   |           |           |           |
|---|-----------|-----------|-----------|
| C | -0.694122 | -1.307951 | 1.013804  |
| C | 0.488608  | -0.403217 | 0.632433  |
| H | 1.067573  | -0.194600 | 1.537804  |
| C | -0.003119 | 0.957331  | 0.064614  |
| C | -1.018487 | 0.723991  | -1.070973 |
| H | -0.493220 | 0.299441  | -1.932074 |
| H | -1.407648 | 1.693404  | -1.393884 |
| C | -1.635525 | -1.541799 | -0.167490 |
| C | -2.168307 | -0.210705 | -0.694906 |
| H | -2.793875 | 0.253561  | 0.072239  |
| H | -2.807596 | -0.374022 | -1.564396 |
| C | 1.440347  | -1.152675 | -0.302078 |
| H | 1.175799  | -0.993632 | -1.351006 |
| H | -2.460030 | -2.190569 | 0.132842  |
| H | -1.099458 | -2.060894 | -0.968866 |
| H | 1.373570  | -2.226824 | -0.104426 |
| O | 2.776077  | -0.709443 | -0.062693 |
| H | 3.351352  | -1.132531 | -0.706788 |
| H | -1.258501 | -0.854417 | 1.830906  |
| H | -0.309665 | -2.258287 | 1.389064  |
| C | -0.651088 | 1.777255  | 1.187863  |
| H | 0.070469  | 1.962223  | 1.986752  |
| H | -0.980839 | 2.745102  | 0.803895  |
| H | -1.516503 | 1.284606  | 1.628245  |
| C | 1.161633  | 1.780400  | -0.490677 |
| H | 1.916977  | 1.961262  | 0.275900  |
| H | 1.649591  | 1.279094  | -1.326627 |
| H | 0.793747  | 2.746853  | -0.843568 |

ax9

```
=====
```

|   |           |           |           |
|---|-----------|-----------|-----------|
| C | 0.814736  | -0.991121 | 1.217107  |
| C | 0.313777  | 0.432856  | 0.911982  |
| H | 0.010300  | 0.877188  | 1.867288  |
| C | -0.955085 | 0.425579  | 0.012523  |
| C | -0.779670 | -0.512588 | -1.197921 |
| H | -0.036922 | -0.077590 | -1.868912 |
| H | -1.727751 | -0.551875 | -1.742227 |
| C | 0.972184  | -1.873692 | -0.022283 |
| C | -0.329051 | -1.922736 | -0.819943 |
| H | -1.101967 | -2.419445 | -0.226636 |
| H | -0.196505 | -2.520320 | -1.723966 |

|   |           |           |           |
|---|-----------|-----------|-----------|
| C | 1.437838  | 1.350451  | 0.444226  |
| H | 2.251775  | 1.290477  | 1.173998  |
| H | 1.268272  | -2.879650 | 0.282389  |
| H | 1.765517  | -1.475930 | -0.656638 |
| H | 1.087485  | 2.385326  | 0.427874  |
| O | 1.919167  | 0.983255  | -0.847667 |
| H | 2.617644  | 1.599079  | -1.088207 |
| H | 0.109730  | -1.476450 | 1.896740  |
| H | 1.763251  | -0.922800 | 1.755058  |
| C | -2.151467 | -0.039651 | 0.855721  |
| H | -2.350780 | 0.673729  | 1.658365  |
| H | -3.048024 | -0.106997 | 0.235487  |
| H | -1.989005 | -1.015528 | 1.311962  |
| C | -1.272030 | 1.830719  | -0.503289 |
| H | -1.361492 | 2.543991  | 0.319715  |
| H | -0.500797 | 2.188933  | -1.186369 |
| H | -2.221454 | 1.822921  | -1.043327 |

eq

```
=====
```

|   |           |           |           |
|---|-----------|-----------|-----------|
| C | -0.412264 | 0.939055  | -0.032367 |
| C | 0.634103  | -0.178806 | -0.280491 |
| H | 0.718015  | -0.290712 | -1.368631 |
| C | 0.197936  | -1.532216 | 0.294757  |
| C | -1.170701 | -1.967988 | -0.219601 |
| H | -1.113970 | -2.131327 | -1.300657 |
| H | -1.458454 | -2.919030 | 0.232123  |
| C | -1.785446 | 0.442258  | -0.524744 |
| C | -2.218245 | -0.896278 | 0.068257  |
| H | -2.354100 | -0.801339 | 1.149178  |
| H | -3.185630 | -1.186068 | -0.346074 |
| C | 2.021679  | 0.177749  | 0.232772  |
| H | 2.036536  | 0.136271  | 1.326395  |
| H | 0.169417  | -1.465108 | 1.387067  |
| H | -2.530813 | 1.212963  | -0.311335 |
| H | -1.739289 | 0.339699  | -1.614604 |
| H | 0.953265  | -2.278436 | 0.046802  |
| H | 2.306600  | 1.186400  | -0.073710 |
| O | 2.951358  | -0.765811 | -0.300437 |
| H | 3.819633  | -0.568351 | 0.061634  |
| C | -0.065721 | 2.193855  | -0.841429 |
| H | 0.836550  | 2.685634  | -0.477736 |
| H | 0.078610  | 1.950246  | -1.896305 |
| H | -0.881599 | 2.917028  | -0.772932 |
| C | -0.489384 | 1.326439  | 1.449788  |
| H | 0.441638  | 1.788541  | 1.782543  |
| H | -1.290324 | 2.053517  | 1.601620  |
| H | -0.688683 | 0.472146  | 2.096458  |

eq2

```
=====
```

|   |           |           |           |
|---|-----------|-----------|-----------|
| C | -0.423145 | 0.936001  | -0.029812 |
| C | 0.639741  | -0.164619 | -0.290780 |
| H | 0.717020  | -0.271197 | -1.379736 |

|   |           |           |           |
|---|-----------|-----------|-----------|
| C | 0.222526  | -1.525398 | 0.282373  |
| C | -1.144337 | -1.977078 | -0.225543 |
| H | -1.088464 | -2.139090 | -1.306637 |
| H | -1.417307 | -2.931827 | 0.227146  |
| C | -1.789672 | 0.425367  | -0.525372 |
| C | -2.204723 | -0.919383 | 0.065640  |
| H | -2.341540 | -0.828064 | 1.146621  |
| H | -3.167859 | -1.222527 | -0.348837 |
| C | 2.028848  | 0.217215  | 0.214919  |
| H | 2.043963  | 0.221038  | 1.309217  |
| H | 0.204657  | -1.467551 | 1.375314  |
| H | -2.544641 | 1.186011  | -0.309713 |
| H | -1.741865 | 0.326138  | -1.615416 |
| H | 0.969535  | -2.278798 | 0.020895  |
| H | 2.306769  | 1.213017  | -0.125502 |
| O | 3.051363  | -0.645209 | -0.278917 |
| H | 2.927159  | -1.516244 | 0.108579  |
| C | -0.091744 | 2.202201  | -0.827038 |
| H | 0.804810  | 2.700805  | -0.458404 |
| H | 0.055181  | 1.970627  | -1.884265 |
| H | -0.915853 | 2.915165  | -0.751045 |
| C | -0.507647 | 1.310261  | 1.455824  |
| H | 0.411407  | 1.792291  | 1.792563  |
| H | -1.325845 | 2.016910  | 1.612230  |
| H | -0.687116 | 0.447567  | 2.097057  |

eq3

```
=====
```

|   |           |           |           |
|---|-----------|-----------|-----------|
| C | -0.408570 | 0.939340  | -0.033289 |
| C | 0.638606  | -0.181206 | -0.268028 |
| H | 0.726522  | -0.294791 | -1.357697 |
| C | 0.194384  | -1.531878 | 0.305678  |
| C | -1.170028 | -1.966727 | -0.220649 |
| H | -1.103628 | -2.132640 | -1.300813 |
| H | -1.463697 | -2.916175 | 0.230552  |
| C | -1.778569 | 0.444356  | -0.536197 |
| C | -2.218466 | -0.892587 | 0.055238  |
| H | -2.364031 | -0.795425 | 1.134659  |
| H | -3.182414 | -1.181829 | -0.367351 |
| C | 2.026817  | 0.175844  | 0.257095  |
| H | 2.038031  | 0.134077  | 1.347053  |
| H | 0.155408  | -1.461378 | 1.397354  |
| H | -2.524374 | 1.216649  | -0.330027 |
| H | -1.723727 | 0.340298  | -1.625548 |
| H | 0.950815  | -2.280916 | 0.068619  |
| H | 2.313608  | 1.186517  | -0.041224 |
| O | 3.024198  | -0.750427 | -0.167801 |
| H | 3.055253  | -0.729503 | -1.129575 |
| C | -0.051832 | 2.191673  | -0.841949 |
| H | 0.847466  | 2.683269  | -0.470860 |
| H | 0.101963  | 1.945505  | -1.894956 |
| H | -0.867293 | 2.916152  | -0.783142 |
| C | -0.496637 | 1.329305  | 1.447554  |
| H | 0.433820  | 1.786701  | 1.788114  |

|   |           |          |          |
|---|-----------|----------|----------|
| H | -1.294856 | 2.061031 | 1.590920 |
| H | -0.706675 | 0.477158 | 2.093610 |

eq4

```
=====
C  0.073354    0.832010    0.021001
C  0.391277   -0.654193   -0.303054
H  0.435670   -0.734819   -1.397902
C -0.711965   -1.608799    0.182862
C -2.097989   -1.229244   -0.327473
H -2.120651   -1.330351   -1.417197
H -2.845411   -1.916127    0.073388
C -1.350388    1.150085   -0.480666
C -2.430556    0.211145    0.045952
H -2.507372    0.298320    1.133256
H -3.401039    0.497700   -0.363233
C  1.712357   -1.185133    0.249633
H  1.775234   -2.252873    0.014993
H -0.722180   -1.620249    1.277354
H -1.583510    2.185759   -0.220013
H -1.346186    1.094066   -1.575088
H -0.463111   -2.623688   -0.134279
H  1.729792   -1.094127    1.336425
O  2.884434   -0.526283   -0.214873
H  2.854687   -0.511025   -1.176893
C  1.023323    1.783681   -0.716714
H  2.037907    1.725010   -0.329757
H  1.050155    1.556839   -1.785406
H  0.672612    2.812681   -0.603872
C  0.178929    1.118363    1.523223
H  1.211752    1.035495    1.864681
H -0.154757    2.137824    1.729227
H -0.429114    0.442339    2.124719
```

eq5

```
=====
C -0.096244    0.945579   -0.037354
C  0.463310   -0.359071   -0.667131
H  0.214559   -0.297458   -1.734174
C -0.210206   -1.621132   -0.114153
C -1.729212   -1.576117   -0.250337
H -1.999761   -1.562155   -1.311031
H -2.173065   -2.474965    0.181487
C -1.632668    0.923848   -0.162892
C -2.287132   -0.324582    0.421582
H -2.102140   -0.375627    1.498492
H -3.369262   -0.270047    0.289661
C  1.985675   -0.512812   -0.618375
H  2.483122    0.419082   -0.898553
H  0.051863   -1.744393    0.938729
H -2.033677    1.824291    0.309734
H -1.888507    0.983263   -1.226459
H  0.194986   -2.492046   -0.635676
H  2.278430   -1.267575   -1.348991
```

|   |           |           |           |
|---|-----------|-----------|-----------|
| O | 2.500969  | -0.988991 | 0.622910  |
| H | 2.293287  | -0.349900 | 1.309110  |
| C | 0.407656  | 2.170351  | -0.806536 |
| H | 1.484995  | 2.304117  | -0.706131 |
| H | 0.170479  | 2.088462  | -1.869492 |
| H | -0.071460 | 3.074477  | -0.423756 |
| C | 0.305060  | 1.109495  | 1.435446  |
| H | 1.362276  | 1.373075  | 1.526706  |
| H | -0.257767 | 1.930476  | 1.885249  |
| H | 0.116457  | 0.215501  | 2.030326  |

eq6

```
=====
```

|   |           |           |           |
|---|-----------|-----------|-----------|
| C | 0.017605  | 0.849050  | 0.040591  |
| C | 0.433589  | -0.630126 | -0.187355 |
| H | 0.499163  | -0.772712 | -1.273001 |
| C | -0.637517 | -1.600882 | 0.328239  |
| C | -1.997162 | -1.341742 | -0.318545 |
| H | -1.922488 | -1.565546 | -1.387468 |
| H | -2.747366 | -2.017112 | 0.096484  |
| C | -1.347160 | 1.065410  | -0.641255 |
| C | -2.433364 | 0.111546  | -0.148055 |
| H | -2.650862 | 0.307864  | 0.904763  |
| H | -3.359276 | 0.292264  | -0.697053 |
| C | 1.804531  | -1.013743 | 0.372058  |
| H | 1.847907  | -2.096543 | 0.491141  |
| H | -0.720123 | -1.523386 | 1.416274  |
| H | -1.656262 | 2.102890  | -0.489075 |
| H | -1.217647 | 0.927051  | -1.720303 |
| H | -0.318422 | -2.622786 | 0.113396  |
| H | 1.963250  | -0.575047 | 1.361448  |
| O | 2.897531  | -0.700026 | -0.488632 |
| H | 2.945662  | 0.253233  | -0.592733 |
| C | 1.024056  | 1.808946  | -0.601503 |
| H | 1.965124  | 1.840967  | -0.045498 |
| H | 1.232504  | 1.537627  | -1.638832 |
| H | 0.627220  | 2.826624  | -0.594762 |
| C | -0.086731 | 1.207519  | 1.528950  |
| H | 0.885658  | 1.157982  | 2.020005  |
| H | -0.451360 | 2.232257  | 1.631003  |
| H | -0.770008 | 0.558713  | 2.074512  |

eq7

```
=====
```

|   |           |           |           |
|---|-----------|-----------|-----------|
| C | -0.092773 | 0.945713  | -0.023146 |
| C | 0.461680  | -0.358744 | -0.653298 |
| H | 0.200313  | -0.306918 | -1.718234 |
| C | -0.214798 | -1.615623 | -0.091129 |
| C | -1.731878 | -1.569660 | -0.257346 |
| H | -1.975436 | -1.571137 | -1.324450 |
| H | -2.187268 | -2.461426 | 0.176761  |
| C | -1.626602 | 0.937264  | -0.183224 |
| C | -2.304123 | -0.308058 | 0.384034  |
| H | -2.158286 | -0.352743 | 1.466711  |

|   |           |           |           |
|---|-----------|-----------|-----------|
| H | -3.380876 | -0.251594 | 0.214085  |
| C | 1.982316  | -0.516279 | -0.630213 |
| H | 2.475575  | 0.401624  | -0.946390 |
| H | 0.016511  | -1.722335 | 0.972849  |
| H | -2.032250 | 1.837674  | 0.285770  |
| H | -1.859950 | 1.003930  | -1.251687 |
| H | 0.194637  | -2.496181 | -0.594278 |
| H | 2.257034  | -1.296676 | -1.347588 |
| O | 2.533474  | -0.830081 | 0.645646  |
| H | 2.180505  | -1.680255 | 0.924331  |
| C | 0.442944  | 2.167560  | -0.775193 |
| H | 1.514002  | 2.304362  | -0.623296 |
| H | 0.257952  | 2.080010  | -1.848353 |
| H | -0.055884 | 3.072605  | -0.421182 |
| C | 0.278275  | 1.093722  | 1.457445  |
| H | 1.354413  | 1.210648  | 1.577686  |
| H | -0.211760 | 1.979063  | 1.870344  |
| H | -0.027269 | 0.234633  | 2.054180  |

eq8

```
=====
```

|   |           |           |           |
|---|-----------|-----------|-----------|
| C | 0.058213  | 0.836456  | 0.016733  |
| C | 0.396855  | -0.644358 | -0.315382 |
| H | 0.443360  | -0.721198 | -1.408446 |
| C | -0.691190 | -1.615423 | 0.174552  |
| C | -2.086560 | -1.252393 | -0.321954 |
| H | -2.117269 | -1.348230 | -1.411945 |
| H | -2.820342 | -1.952222 | 0.081764  |
| C | -1.373917 | 1.135789  | -0.472248 |
| C | -2.436384 | 0.181102  | 0.061321  |
| H | -2.503900 | 0.262767  | 1.149723  |
| H | -3.414673 | 0.455642  | -0.337440 |
| C | 1.721663  | -1.156038 | 0.234723  |
| H | 1.795073  | -2.223027 | 0.004312  |
| H | -0.693289 | -1.634123 | 1.269032  |
| H | -1.618712 | 2.167788  | -0.207692 |
| H | -1.378353 | 1.081599  | -1.566704 |
| H | -0.432065 | -2.624943 | -0.151200 |
| H | 1.736167  | -1.054711 | 1.324586  |
| O | 2.830827  | -0.469404 | -0.339630 |
| H | 3.634603  | -0.892560 | -0.024024 |
| C | 0.987603  | 1.804399  | -0.724671 |
| H | 2.011268  | 1.737310  | -0.365294 |
| H | 0.991485  | 1.594936  | -1.796715 |
| H | 0.635890  | 2.829794  | -0.584460 |
| C | 0.170155  | 1.119980  | 1.519273  |
| H | 1.207921  | 1.063295  | 1.851156  |
| H | -0.188114 | 2.129687  | 1.732068  |
| H | -0.414274 | 0.426340  | 2.124239  |

eq9

```
=====
```

|   |           |           |           |
|---|-----------|-----------|-----------|
| C | -0.089638 | 0.939578  | -0.029444 |
| C | 0.453865  | -0.376177 | -0.648428 |

|   |           |           |           |
|---|-----------|-----------|-----------|
| H | 0.189977  | -0.327774 | -1.712748 |
| C | -0.230061 | -1.622049 | -0.072517 |
| C | -1.746568 | -1.565273 | -0.238253 |
| H | -1.992583 | -1.579704 | -1.305034 |
| H | -2.209474 | -2.447298 | 0.208148  |
| C | -1.622583 | 0.941423  | -0.197840 |
| C | -2.311423 | -0.290770 | 0.384405  |
| H | -2.168766 | -0.321113 | 1.467971  |
| H | -3.387364 | -0.227992 | 0.210939  |
| C | 1.967817  | -0.544171 | -0.631642 |
| H | 2.463140  | 0.360795  | -0.992060 |
| H | 0.019326  | -1.720465 | 0.985637  |
| H | -2.023277 | 1.851597  | 0.256344  |
| H | -1.850285 | 0.994638  | -1.268345 |
| H | 0.172419  | -2.507710 | -0.571002 |
| H | 2.226409  | -1.358274 | -1.316249 |
| O | 2.424767  | -0.865496 | 0.681613  |
| H | 3.373056  | -1.016302 | 0.635731  |
| C | 0.460517  | 2.151409  | -0.786909 |
| H | 1.531992  | 2.279391  | -0.629855 |
| H | 0.281018  | 2.058224  | -1.860594 |
| H | -0.032239 | 3.063280  | -0.441878 |
| C | 0.271467  | 1.096624  | 1.452719  |
| H | 1.346286  | 1.217395  | 1.578906  |
| H | -0.224299 | 1.982598  | 1.857516  |
| H | -0.033827 | 0.239114  | 2.051120  |

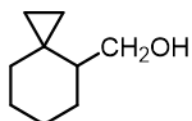

spiro[2.5]octan-4-ylmethanol

| Conformation | Electronic Energy | Enthalpy    | Gibbs Free Energy |
|--------------|-------------------|-------------|-------------------|
| ax1          | -427.747984       | -427.498747 | -427.543544       |
| ax2          | -427.747098       | -427.498049 | -427.543592       |
| ax3          | -427.743829       | -427.494609 | -427.53986        |
| ax4          | -427.747554       | -427.498361 | -427.543577       |
| ax5          | -427.747544       | -427.4984   | -427.543646       |
| ax6          | -427.746221       | -427.497143 | -427.542546       |
| ax7          | -427.745554       | -427.49648  | -427.541821       |
| ax8          | -427.743771       | -427.494608 | -427.539765       |
| ax9          | -427.743928       | -427.494701 | -427.54005        |
| eq           | -427.745458       | -427.496301 | -427.541676       |
| eq2          | -427.745023       | -427.495985 | -427.541363       |

|     |  |             |  |             |  |             |
|-----|--|-------------|--|-------------|--|-------------|
| eq3 |  | -427.744254 |  | -427.495104 |  | -427.540507 |
| eq4 |  | -427.745948 |  | -427.496635 |  | -427.541873 |
| eq5 |  | -427.745861 |  | -427.496697 |  | -427.54207  |
| eq6 |  | -427.745114 |  | -427.495887 |  | -427.541134 |
| eq7 |  | -427.743223 |  | -427.494025 |  | -427.539397 |
| eq8 |  | -427.744801 |  | -427.495584 |  | -427.540412 |
| eq9 |  | -427.745613 |  | -427.496504 |  | -427.54169  |

ax1

```
=====
```

|   |           |           |           |
|---|-----------|-----------|-----------|
| C | 0.282019  | 0.787952  | 0.019747  |
| C | 0.365108  | -0.570311 | 0.701458  |
| H | 0.992807  | -0.467721 | 1.591493  |
| C | 0.333517  | 2.001635  | 0.901861  |
| C | 1.494736  | 1.677750  | -0.005126 |
| C | -1.043714 | -1.009180 | 1.130167  |
| C | -2.053348 | -0.964904 | -0.022049 |
| H | -1.799360 | -1.719239 | -0.770967 |
| H | -3.045070 | -1.221219 | 0.354323  |
| C | -0.688281 | 0.837956  | -1.144106 |
| C | -2.085034 | 0.412808  | -0.685767 |
| H | -2.458521 | 1.148459  | 0.033358  |
| H | -2.775970 | 0.409896  | -1.530346 |
| C | 1.012189  | -1.633761 | -0.183611 |
| H | 0.411914  | -1.813607 | -1.079374 |
| H | 0.474390  | 1.850155  | 1.963329  |
| H | -0.291937 | 2.842221  | 0.634828  |
| H | 1.643570  | 2.303529  | -0.874556 |
| H | 2.400309  | 1.321117  | 0.466084  |
| H | -1.386185 | -0.337340 | 1.921975  |
| H | -0.710391 | 1.848631  | -1.556196 |
| H | -0.347944 | 0.174093  | -1.945342 |
| H | -1.004196 | -2.013398 | 1.558183  |
| H | 1.066672  | -2.573223 | 0.367626  |
| O | 2.348755  | -1.317712 | -0.554804 |
| H | 2.336717  | -0.450330 | -0.971428 |

ax2

```
=====
```

|   |           |           |           |
|---|-----------|-----------|-----------|
| C | 0.867686  | -0.568829 | -0.056733 |
| C | -0.557057 | -0.444175 | 0.460651  |
| H | -0.703445 | -1.195631 | 1.242395  |
| C | 1.904146  | -1.074326 | 0.905706  |
| C | 1.439254  | -1.941148 | -0.240559 |
| C | -0.769478 | 0.949180  | 1.069281  |
| C | -0.366109 | 2.072473  | 0.110702  |
| H | -1.030448 | 2.077467  | -0.758078 |
| H | -0.492153 | 3.037330  | 0.604695  |
| C | 1.291263  | 0.535742  | -1.005552 |
| C | 1.079144  | 1.907076  | -0.361629 |
| H | 1.749721  | 2.003188  | 0.498098  |
| H | 1.342712  | 2.698866  | -1.064814 |
| C | -1.563500 | -0.757881 | -0.637529 |



|   |           |           |           |
|---|-----------|-----------|-----------|
| H | -1.335651 | -1.739404 | -1.063716 |
| H | 1.582016  | -1.346601 | 1.901407  |
| H | 2.897350  | -0.651220 | 0.842369  |
| H | 2.125430  | -2.098735 | -1.061353 |
| H | 0.806831  | -2.785565 | -0.001712 |
| H | -0.158680 | 1.023760  | 1.973770  |
| H | 2.339096  | 0.396564  | -1.278980 |
| H | 0.709755  | 0.475463  | -1.930797 |
| H | -1.810577 | 1.061825  | 1.373196  |
| H | -1.508103 | -0.020701 | -1.442577 |
| O | -2.870112 | -0.759410 | -0.066518 |
| H | -3.505054 | -0.930007 | -0.767791 |

ax3

```
=====
```

|   |           |           |           |
|---|-----------|-----------|-----------|
| C | 0.972765  | -0.076455 | -0.058524 |
| C | -0.141373 | -0.669374 | 0.794213  |
| H | 0.331607  | -1.128788 | 1.668919  |
| C | 2.259872  | 0.260775  | 0.643574  |
| C | 2.189457  | -0.913617 | -0.303954 |
| C | -1.073744 | 0.442915  | 1.306532  |
| C | -1.508960 | 1.452502  | 0.237167  |
| H | -2.193314 | 0.993969  | -0.480153 |
| H | -2.063803 | 2.260572  | 0.717513  |
| C | 0.523556  | 0.892364  | -1.135078 |
| C | -0.308076 | 2.018043  | -0.520319 |
| H | 0.318725  | 2.587715  | 0.173279  |
| H | -0.642604 | 2.710755  | -1.294273 |
| C | -0.873234 | -1.832006 | 0.127322  |
| H | -1.543451 | -2.293889 | 0.859443  |
| H | 2.334838  | 0.045316  | 1.700600  |
| H | 2.797443  | 1.139466  | 0.314033  |
| H | 2.685318  | -0.818123 | -1.260208 |
| H | 2.216089  | -1.904644 | 0.128785  |
| H | -0.538614 | 0.994955  | 2.084601  |
| H | 1.400829  | 1.297963  | -1.643626 |
| H | -0.075566 | 0.363399  | -1.879433 |
| H | -1.948958 | -0.004018 | 1.785246  |
| H | -0.143383 | -2.585125 | -0.172243 |
| O | -1.598924 | -1.511338 | -1.055606 |
| H | -2.385336 | -1.019693 | -0.803222 |

ax4

```
=====
```

|   |           |           |           |
|---|-----------|-----------|-----------|
| C | 0.894504  | -0.533105 | -0.051856 |
| C | -0.536252 | -0.479547 | 0.462672  |
| H | -0.648155 | -1.235617 | 1.245338  |
| C | 1.953174  | -0.992144 | 0.909904  |
| C | 1.529977  | -1.876673 | -0.238887 |
| C | -0.812444 | 0.903472  | 1.069722  |
| C | -0.471259 | 2.043167  | 0.106438  |
| H | -1.132514 | 2.007847  | -0.764379 |
| H | -0.649937 | 3.002044  | 0.595490  |
| C | 1.267403  | 0.591291  | -0.999399 |

|   |           |           |           |
|---|-----------|-----------|-----------|
| C | 0.982250  | 1.951445  | -0.360297 |
| H | 1.642928  | 2.085322  | 0.501996  |
| H | 1.206681  | 2.753815  | -1.064913 |
| C | -1.522292 | -0.847341 | -0.644206 |
| H | -1.268649 | -1.832594 | -1.035990 |
| H | 1.643570  | -1.281970 | 1.904632  |
| H | 2.925428  | -0.522604 | 0.848624  |
| H | 2.223007  | -1.999454 | -1.059860 |
| H | 0.938102  | -2.750658 | -0.002542 |
| H | -0.199679 | 1.009040  | 1.969580  |
| H | 2.322873  | 0.504887  | -1.264972 |
| H | 0.697113  | 0.501126  | -1.928893 |
| H | -1.852019 | 0.977312  | 1.398011  |
| H | -1.466454 | -0.139341 | -1.474878 |
| O | -2.864728 | -0.947290 | -0.179241 |
| H | -3.174836 | -0.064229 | 0.042143  |

ax5

```
=====
```

|   |           |           |           |
|---|-----------|-----------|-----------|
| C | 0.855295  | -0.580542 | -0.055374 |
| C | -0.572558 | -0.430014 | 0.446383  |
| H | -0.738104 | -1.185673 | 1.222920  |
| C | 1.873481  | -1.111698 | 0.912773  |
| C | 1.402151  | -1.962454 | -0.242709 |
| C | -0.766117 | 0.961938  | 1.062908  |
| C | -0.327792 | 2.083858  | 0.117920  |
| H | -0.981752 | 2.109073  | -0.758205 |
| H | -0.439730 | 3.047226  | 0.618089  |
| C | 1.307493  | 0.521767  | -0.993563 |
| C | 1.118679  | 1.891899  | -0.340024 |
| H | 1.782149  | 1.966028  | 0.527367  |
| H | 1.406272  | 2.683866  | -1.033480 |
| C | -1.575137 | -0.718569 | -0.668877 |
| H | -1.347665 | -1.690736 | -1.116916 |
| H | 1.537435  | -1.383646 | 1.904014  |
| H | 2.875118  | -0.707312 | 0.861157  |
| H | 2.092051  | -2.127922 | -1.058793 |
| H | 0.752356  | -2.796616 | -0.014653 |
| H | -0.168765 | 1.019367  | 1.977482  |
| H | 2.353833  | 0.363002  | -1.261830 |
| H | 0.730016  | 0.480200  | -1.922410 |
| H | -1.809830 | 1.093741  | 1.351282  |
| H | -1.512377 | 0.029516  | -1.458385 |
| O | -2.925027 | -0.685951 | -0.218275 |
| H | -3.023765 | -1.349615 | 0.471936  |

ax6

```
=====
```

|   |           |           |           |
|---|-----------|-----------|-----------|
| C | 0.215357  | 0.822368  | -0.000551 |
| C | 0.417503  | -0.527862 | 0.669160  |
| H | 1.055320  | -0.380650 | 1.548368  |
| C | 0.200022  | 2.031777  | 0.894158  |
| C | 1.351547  | 1.794792  | -0.052007 |
| C | -0.941849 | -1.071291 | 1.136539  |

|   |           |           |           |
|---|-----------|-----------|-----------|
| C | -1.973597 | -1.110163 | 0.004522  |
| H | -1.667793 | -1.836135 | -0.753636 |
| H | -2.932123 | -1.454043 | 0.396767  |
| C | -0.789959 | 0.805771  | -1.134969 |
| C | -2.135468 | 0.263721  | -0.648103 |
| H | -2.552409 | 0.960601  | 0.085712  |
| H | -2.843747 | 0.207997  | -1.476405 |
| C | 1.117930  | -1.550544 | -0.223954 |
| H | 0.561778  | -1.714138 | -1.146015 |
| H | 0.380963  | 1.882652  | 1.950115  |
| H | -0.494377 | 2.825613  | 0.655196  |
| H | 1.428238  | 2.433087  | -0.921722 |
| H | 2.296389  | 1.492901  | 0.376778  |
| H | -1.317658 | -0.421990 | 1.931926  |
| H | -0.905158 | 1.815743  | -1.533288 |
| H | -0.418722 | 0.181207  | -1.953447 |
| H | -0.816246 | -2.066605 | 1.568292  |
| H | 1.161750  | -2.507821 | 0.306713  |
| O | 2.421819  | -1.156755 | -0.632369 |
| H | 2.920335  | -0.915791 | 0.154833  |

ax7

```
=====
```

|   |           |           |           |
|---|-----------|-----------|-----------|
| C | 0.172029  | 0.836942  | -0.003064 |
| C | 0.435109  | -0.504048 | 0.666828  |
| H | 1.066704  | -0.331217 | 1.543370  |
| C | 0.120376  | 2.044599  | 0.892851  |
| C | 1.270696  | 1.850535  | -0.064712 |
| C | -0.899772 | -1.107708 | 1.130230  |
| C | -1.926730 | -1.195216 | -0.002816 |
| H | -1.581840 | -1.899945 | -0.764610 |
| H | -2.867200 | -1.589823 | 0.385442  |
| C | -0.839484 | 0.782168  | -1.131038 |
| C | -2.156546 | 0.173320  | -0.645869 |
| H | -2.605154 | 0.843661  | 0.094014  |
| H | -2.862935 | 0.090034  | -1.473532 |
| C | 1.186261  | -1.484328 | -0.224628 |
| H | 0.671324  | -1.619648 | -1.179034 |
| H | 0.315695  | 1.901210  | 1.947034  |
| H | -0.604971 | 2.812555  | 0.661101  |
| H | 1.313076  | 2.493306  | -0.933689 |
| H | 2.228916  | 1.572300  | 0.348069  |
| H | -1.306702 | -0.472936 | 1.922137  |
| H | -1.002956 | 1.789063  | -1.520332 |
| H | -0.444114 | 0.183072  | -1.957290 |
| H | -0.730446 | -2.094537 | 1.566080  |
| H | 1.225351  | -2.457563 | 0.275247  |
| O | 2.506888  | -0.997529 | -0.448941 |
| H | 2.958516  | -1.616885 | -1.029175 |

ax8

```
=====
```

|   |           |           |           |
|---|-----------|-----------|-----------|
| C | 0.969165  | -0.088102 | -0.060675 |
| C | -0.147471 | -0.656127 | 0.806784  |

|   |           |           |           |
|---|-----------|-----------|-----------|
| H | 0.326979  | -1.121276 | 1.676991  |
| C | 2.264979  | 0.233305  | 0.632687  |
| C | 2.171448  | -0.945548 | -0.307386 |
| C | -1.050949 | 0.477317  | 1.320959  |
| C | -1.496887 | 1.459463  | 0.233368  |
| H | -2.166789 | 0.955082  | -0.463631 |
| H | -2.056684 | 2.275999  | 0.693838  |
| C | 0.528802  | 0.880162  | -1.142039 |
| C | -0.298798 | 2.014732  | -0.537037 |
| H | 0.332633  | 2.594858  | 0.144017  |
| H | -0.635334 | 2.696056  | -1.320519 |
| C | -0.910967 | -1.801573 | 0.157066  |
| H | -1.607524 | -2.217586 | 0.892311  |
| H | 2.342455  | 0.023095  | 1.690606  |
| H | 2.814250  | 1.101565  | 0.295026  |
| H | 2.663920  | -0.863431 | -1.266648 |
| H | 2.185268  | -1.934114 | 0.131592  |
| H | -0.489895 | 1.036325  | 2.076230  |
| H | 1.411002  | 1.276937  | -1.649358 |
| H | -0.071766 | 0.351913  | -1.884963 |
| H | -1.920732 | 0.049620  | 1.825165  |
| H | -0.202428 | -2.588479 | -0.119451 |
| O | -1.628381 | -1.368160 | -0.996469 |
| H | -2.074238 | -2.133057 | -1.371805 |

ax9

```
=====
```

|   |           |           |           |
|---|-----------|-----------|-----------|
| C | 0.961075  | -0.033381 | -0.041099 |
| C | -0.137722 | -0.656309 | 0.814266  |
| H | 0.350041  | -1.087321 | 1.695236  |
| C | 2.240291  | 0.329738  | 0.662919  |
| C | 2.199386  | -0.839912 | -0.290993 |
| C | -1.112979 | 0.426033  | 1.305029  |
| C | -1.591768 | 1.374390  | 0.202574  |
| H | -2.201058 | 0.824917  | -0.516751 |
| H | -2.223338 | 2.149201  | 0.641277  |
| C | 0.503628  | 0.937263  | -1.115919 |
| C | -0.407555 | 2.011570  | -0.523327 |
| H | 0.167835  | 2.615825  | 0.185452  |
| H | -0.757636 | 2.683249  | -1.308849 |
| C | -0.826682 | -1.853926 | 0.163582  |
| H | -1.549041 | -2.267097 | 0.869205  |
| H | 2.318033  | 0.110224  | 1.718733  |
| H | 2.756019  | 1.223312  | 0.339042  |
| H | 2.693146  | -0.726183 | -1.246365 |
| H | 2.250242  | -1.832267 | 0.136093  |
| H | -0.601156 | 1.021847  | 2.067115  |
| H | 1.381414  | 1.391068  | -1.580769 |
| H | -0.033746 | 0.414802  | -1.912051 |
| H | -1.965978 | -0.049067 | 1.794975  |
| H | -0.081876 | -2.629827 | -0.038036 |
| O | -1.565991 | -1.575791 | -1.021708 |
| H | -0.941015 | -1.409158 | -1.732834 |

eq

```
=====
C  -0.455518    0.848768   -0.175727
C   0.637432   -0.206152   -0.320922
H   0.706806   -0.456008   -1.387016
C  -0.452881    1.792570    0.995166
C  -0.194427    2.308544   -0.402209
C   0.230699   -1.475846    0.438935
C  -1.131127   -2.003284   -0.007395
H  -1.071703   -2.307348   -1.057392
H  -1.395381   -2.892930    0.566880
C  -1.814078    0.333977   -0.616944
C  -2.208437   -0.931302    0.142556
H  -2.331149   -0.689524    1.202920
H  -3.170418   -1.301331   -0.216270
C   2.020844    0.250282    0.112595
H   2.050806    0.384735    1.198000
H   0.384264    1.774984    1.678186
H  -1.405742    2.025587    1.450713
H  -0.982389    2.875548   -0.878802
H   0.805341    2.643260   -0.634066
H   0.194338   -1.238005    1.508231
H  -2.561433    1.117155   -0.474628
H  -1.778488    0.112539   -1.689259
H   0.997899   -2.238596    0.304603
H   2.284783    1.198419   -0.360262
O   2.955880   -0.754725   -0.277110
H   3.830393   -0.476030    0.008707
```

eq2

```
=====
C  -0.017407    0.782115   -0.121803
C   0.408889   -0.681460   -0.204498
H   0.406437   -0.963583   -1.264412
C   0.260381    1.577070    1.124049
C   0.979107    1.899610   -0.164587
C  -0.644209   -1.541595    0.506526
C  -2.037973   -1.323935   -0.084004
H  -2.039352   -1.680804   -1.118769
H  -2.771994   -1.921559    0.459177
C  -1.377485    1.011582   -0.752880
C  -2.438278    0.150944   -0.066286
H  -2.546718    0.483060    0.970706
H  -3.407770    0.284859   -0.549201
C   1.801732   -0.998582    0.315005
H   1.873226   -2.075893    0.488916
H   0.834715    1.126918    1.921109
H  -0.512169    2.258297    1.454115
H   0.694092    2.803991   -0.685144
H   2.024428    1.637636   -0.228690
H  -0.650452   -1.286870    1.571924
H  -1.639953    2.069388   -0.686983
H  -1.331558    0.753843   -1.816410
H  -0.369622   -2.595576    0.429986
```

|   |          |           |           |
|---|----------|-----------|-----------|
| H | 1.990748 | -0.497815 | 1.269107  |
| O | 2.773987 | -0.605066 | -0.652878 |
| H | 3.645507 | -0.809865 | -0.301538 |

eq3

```
=====
```

|   |           |           |           |
|---|-----------|-----------|-----------|
| C | -0.089836 | 0.861900  | -0.218046 |
| C | 0.393758  | -0.523147 | -0.640516 |
| H | 0.100927  | -0.640972 | -1.691979 |
| C | 0.499477  | 1.564032  | 0.973467  |
| C | 0.744574  | 2.090169  | -0.422428 |
| C | -0.352841 | -1.594077 | 0.164921  |
| C | -1.867332 | -1.459944 | 0.008440  |
| H | -2.136892 | -1.650952 | -1.035264 |
| H | -2.375851 | -2.214146 | 0.611595  |
| C | -1.590646 | 1.008039  | -0.395433 |
| C | -2.342662 | -0.060583 | 0.397718  |
| H | -2.163160 | 0.096765  | 1.465749  |
| H | -3.417715 | 0.034585  | 0.235350  |
| C | 1.894318  | -0.769008 | -0.632522 |
| H | 2.414527  | 0.006603  | -1.200137 |
| H | 1.330735  | 1.097998  | 1.478217  |
| H | -0.181007 | 2.120794  | 1.603966  |
| H | 0.229957  | 2.994457  | -0.717742 |
| H | 1.742468  | 1.986335  | -0.822939 |
| H | -0.082627 | -1.493417 | 1.219155  |
| H | -1.900144 | 2.007145  | -0.082050 |
| H | -1.839204 | 0.910335  | -1.457920 |
| H | -0.025296 | -2.585741 | -0.156880 |
| H | 2.077854  | -1.724034 | -1.134091 |
| O | 2.395380  | -0.825189 | 0.701629  |
| H | 3.329529  | -1.048527 | 0.658326  |

eq4

```
=====
```

|   |           |           |           |
|---|-----------|-----------|-----------|
| C | -0.464490 | 0.845042  | -0.175340 |
| C | 0.642634  | -0.193958 | -0.333082 |
| H | 0.707558  | -0.439279 | -1.400292 |
| C | -0.474688 | 1.778460  | 1.004288  |
| C | -0.219199 | 2.309765  | -0.387435 |
| C | 0.253317  | -1.470334 | 0.425482  |
| C | -1.106718 | -2.011520 | -0.013061 |
| H | -1.048033 | -2.314471 | -1.063183 |
| H | -1.357209 | -2.903933 | 0.562760  |
| C | -1.817939 | 0.318217  | -0.617077 |
| C | -2.195313 | -0.952176 | 0.142055  |
| H | -2.317770 | -0.712895 | 1.202931  |
| H | -3.153333 | -1.334501 | -0.214171 |
| C | 2.026135  | 0.286748  | 0.092710  |
| H | 2.054356  | 0.459616  | 1.172594  |
| H | 0.360075  | 1.766760  | 1.690037  |
| H | -1.431833 | 1.994959  | 1.459027  |
| H | -1.011304 | 2.873285  | -0.861185 |
| H | 0.777648  | 2.657225  | -0.613415 |

|   |           |           |           |
|---|-----------|-----------|-----------|
| H | 0.226528  | -1.241127 | 1.496775  |
| H | -2.573546 | 1.092689  | -0.470951 |
| H | -1.782258 | 0.099373  | -1.689835 |
| H | 1.011750  | -2.243025 | 0.279856  |
| H | 2.281499  | 1.220277  | -0.405172 |
| O | 3.054956  | -0.626216 | -0.277775 |
| H | 2.953784  | -1.426695 | 0.245181  |

eq5

```
=====
```

|   |           |           |           |
|---|-----------|-----------|-----------|
| C | -0.453824 | 0.847735  | -0.176956 |
| C | 0.642344  | -0.205643 | -0.308942 |
| H | 0.715100  | -0.457791 | -1.376357 |
| C | -0.458547 | 1.794311  | 0.991534  |
| C | -0.192674 | 2.307556  | -0.405033 |
| C | 0.230883  | -1.473025 | 0.450731  |
| C | -1.125878 | -2.004863 | -0.005582 |
| H | -1.057187 | -2.312144 | -1.054093 |
| H | -1.393313 | -2.893111 | 0.569325  |
| C | -1.808732 | 0.330297  | -0.626088 |
| C | -2.206427 | -0.934460 | 0.132609  |
| H | -2.338509 | -0.690737 | 1.191361  |
| H | -3.164577 | -1.307318 | -0.233342 |
| C | 2.026521  | 0.255313  | 0.134681  |
| H | 2.054071  | 0.385209  | 1.216952  |
| H | 0.375070  | 1.778595  | 1.679065  |
| H | -1.413725 | 2.027384  | 1.442061  |
| H | -0.978593 | 2.872274  | -0.887683 |
| H | 0.807696  | 2.643869  | -0.631669 |
| H | 0.184404  | -1.231102 | 1.518634  |
| H | -2.558192 | 1.112517  | -0.489648 |
| H | -1.766053 | 0.107625  | -1.697923 |
| H | 1.001062  | -2.234937 | 0.327737  |
| H | 2.289757  | 1.208929  | -0.327620 |
| O | 3.032017  | -0.710956 | -0.157031 |
| H | 3.064856  | -0.824934 | -1.112266 |

eq6

```
=====
```

|   |           |           |           |
|---|-----------|-----------|-----------|
| C | -0.094163 | 0.876522  | -0.206056 |
| C | 0.405811  | -0.492888 | -0.656159 |
| H | 0.125516  | -0.593528 | -1.712858 |
| C | 0.523647  | 1.574906  | 0.973281  |
| C | 0.712613  | 2.121332  | -0.423282 |
| C | -0.333419 | -1.592949 | 0.117722  |
| C | -1.849646 | -1.471635 | -0.029457 |
| H | -2.120741 | -1.626318 | -1.078467 |
| H | -2.346497 | -2.253084 | 0.547841  |
| C | -1.600031 | 1.008425  | -0.351205 |
| C | -2.332371 | -0.092106 | 0.415108  |
| H | -2.140946 | 0.028617  | 1.485883  |
| H | -3.409979 | -0.000784 | 0.269005  |
| C | 1.914736  | -0.726469 | -0.628364 |
| H | 2.445121  | 0.092393  | -1.111681 |

|   |           |           |           |
|---|-----------|-----------|-----------|
| H | 1.379754  | 1.115317  | 1.442288  |
| H | -0.140509 | 2.113887  | 1.635694  |
| H | 0.169623  | 3.017958  | -0.689604 |
| H | 1.697629  | 2.043953  | -0.859661 |
| H | -0.078950 | -1.516781 | 1.180189  |
| H | -1.914669 | 1.993910  | -0.001938 |
| H | -1.863936 | 0.942639  | -1.412520 |
| H | 0.004548  | -2.573718 | -0.227885 |
| H | 2.125620  | -1.632845 | -1.204329 |
| O | 2.484184  | -0.844651 | 0.671900  |
| H | 2.111876  | -1.625238 | 1.093309  |

eq7

```
=====
```

|   |           |           |           |
|---|-----------|-----------|-----------|
| C | -0.071371 | 0.842195  | -0.235384 |
| C | 0.375744  | -0.566010 | -0.616432 |
| H | 0.064697  | -0.710166 | -1.660139 |
| C | 0.475084  | 1.539224  | 0.979734  |
| C | 0.823874  | 2.032111  | -0.405982 |
| C | -0.396767 | -1.583082 | 0.230604  |
| C | -1.907089 | -1.415600 | 0.054714  |
| H | -2.170664 | -1.658632 | -0.979585 |
| H | -2.441648 | -2.121426 | 0.692892  |
| C | -1.560249 | 1.028526  | -0.464858 |
| C | -2.355754 | 0.014395  | 0.358989  |
| H | -2.198448 | 0.222499  | 1.421722  |
| H | -3.424240 | 0.124248  | 0.165658  |
| C | 1.872578  | -0.855469 | -0.635528 |
| H | 2.389313  | -0.160708 | -1.300817 |
| H | 1.241964  | 1.060373  | 1.567746  |
| H | -0.222557 | 2.133352  | 1.554697  |
| H | 0.373397  | 2.957839  | -0.737089 |
| H | 1.836266  | 1.875641  | -0.751399 |
| H | -0.128009 | -1.444464 | 1.281503  |
| H | -1.849349 | 2.047680  | -0.200241 |
| H | -1.784551 | 0.891552  | -1.527955 |
| H | -0.096885 | -2.596365 | -0.047541 |
| H | 2.007353  | -1.855929 | -1.050337 |
| O | 2.503218  | -0.873608 | 0.643148  |
| H | 2.841315  | 0.005634  | 0.830563  |

eq8

```
=====
```

|   |           |           |           |
|---|-----------|-----------|-----------|
| C | -0.011100 | 0.778101  | -0.118531 |
| C | 0.425231  | -0.684222 | -0.167467 |
| H | 0.420311  | -0.992225 | -1.220210 |
| C | 0.186363  | 1.579915  | 1.136421  |
| C | 0.965181  | 1.919191  | -0.111285 |
| C | -0.629995 | -1.528416 | 0.556967  |
| C | -2.011177 | -1.339175 | -0.074143 |
| H | -1.984958 | -1.737798 | -1.093153 |
| H | -2.756834 | -1.917553 | 0.473939  |
| C | -1.347006 | 0.983885  | -0.807245 |
| C | -2.421481 | 0.133124  | -0.126956 |



|   |           |           |           |
|---|-----------|-----------|-----------|
| H | -2.569473 | 0.502675  | 0.892112  |
| H | -3.374760 | 0.238968  | -0.647486 |
| C | 1.833633  | -0.961686 | 0.343324  |
| H | 1.919290  | -2.014351 | 0.612268  |
| H | 0.734967  | 1.141399  | 1.957965  |
| H | -0.615223 | 2.244344  | 1.428609  |
| H | 0.693250  | 2.814018  | -0.653936 |
| H | 2.028053  | 1.721259  | -0.078862 |
| H | -0.658789 | -1.238174 | 1.612446  |
| H | -1.621319 | 2.040257  | -0.778471 |
| H | -1.262863 | 0.696690  | -1.860424 |
| H | -0.346014 | -2.582001 | 0.519464  |
| H | 2.052717  | -0.378087 | 1.243153  |
| O | 2.839467  | -0.742561 | -0.643330 |
| H | 2.688021  | 0.116766  | -1.047285 |

eq9

```
=====
```

|   |           |           |           |
|---|-----------|-----------|-----------|
| C | -0.011074 | 0.782011  | -0.124474 |
| C | 0.409522  | -0.682862 | -0.198103 |
| H | 0.403303  | -0.971487 | -1.258395 |
| C | 0.269298  | 1.580110  | 1.118678  |
| C | 0.989862  | 1.896217  | -0.170359 |
| C | -0.648887 | -1.536695 | 0.512763  |
| C | -2.040616 | -1.316602 | -0.081551 |
| H | -2.041571 | -1.677571 | -1.114925 |
| H | -2.778096 | -1.909077 | 0.462567  |
| C | -1.369646 | 1.014269  | -0.757872 |
| C | -2.434877 | 0.160023  | -0.070029 |
| H | -2.543764 | 0.496226  | 0.965561  |
| H | -3.402959 | 0.296115  | -0.555123 |
| C | 1.802093  | -1.006732 | 0.331506  |
| H | 1.869374  | -2.085403 | 0.501754  |
| H | 0.842118  | 1.130209  | 1.916959  |
| H | -0.500832 | 2.264998  | 1.446678  |
| H | 0.707182  | 2.799676  | -0.693800 |
| H | 2.034823  | 1.632339  | -0.231508 |
| H | -0.656110 | -1.276598 | 1.576803  |
| H | -1.628277 | 2.073259  | -0.695949 |
| H | -1.323501 | 0.752907  | -1.820577 |
| H | -0.377208 | -2.591965 | 0.442405  |
| H | 1.985184  | -0.518530 | 1.289075  |
| O | 2.859039  | -0.589945 | -0.527646 |
| H | 2.743962  | -1.033968 | -1.373706 |

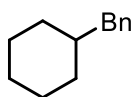

(cyclohexylmethyl)benzene

| Conformation | Electronic Energy | Enthalpy    | Gibbs Free Energy |
|--------------|-------------------|-------------|-------------------|
| ax           | -506.170807       | -505.877184 | -505.927701       |
| ax2          | -506.164437       | -505.870745 | -505.921025       |
| eq           | -506.173096       | -505.879783 | -505.930537       |
| eq2          | -506.172033       | -505.878657 | -505.928887       |

ax

|   |           |           |           |
|---|-----------|-----------|-----------|
| C | -2.436130 | -1.384546 | 0.058269  |
| C | -1.048434 | -0.846116 | 0.433990  |
| H | -0.575571 | -1.566081 | 1.107900  |
| C | -1.192306 | 0.484502  | 1.185201  |
| C | -2.018136 | 1.510177  | 0.406279  |
| H | -2.123124 | 2.422735  | 0.995732  |
| H | -1.495027 | 1.789544  | -0.512861 |
| C | -3.273057 | -0.366105 | -0.719612 |
| C | -3.395441 | 0.948103  | 0.052101  |
| H | -3.966120 | 1.676364  | -0.526927 |
| H | -3.953056 | 0.767125  | 0.976920  |
| H | -1.692358 | 0.287195  | 2.138262  |
| H | -2.814224 | -0.171753 | -1.692851 |
| H | -4.263208 | -0.779999 | -0.918524 |
| H | -0.207804 | 0.891319  | 1.424844  |
| H | -2.331297 | -2.307754 | -0.516265 |
| H | -2.968866 | -1.640449 | 0.979235  |
| C | -0.140394 | -0.737115 | -0.807420 |
| H | -0.127548 | -1.712140 | -1.300727 |
| H | -0.556711 | -0.024067 | -1.519482 |
| C | 1.271120  | -0.331180 | -0.470933 |
| C | 1.729003  | 0.962489  | -0.716832 |
| C | 2.144026  | -1.239115 | 0.131691  |
| C | 3.021428  | 1.342890  | -0.370195 |
| H | 1.064533  | 1.678759  | -1.185375 |
| C | 3.436010  | -0.865265 | 0.479375  |
| H | 1.806460  | -2.250721 | 0.324771  |
| C | 3.879321  | 0.429776  | 0.230535  |
| H | 3.357351  | 2.351873  | -0.570147 |
| H | 4.099083  | -1.584903 | 0.941299  |
| H | 4.885423  | 0.721990  | 0.499512  |

ax2

|   |          |           |           |
|---|----------|-----------|-----------|
| C | 1.853134 | -1.165524 | 0.784198  |
| C | 1.611886 | -0.988109 | -0.725893 |
| H | 2.251916 | -1.718489 | -1.227644 |
| C | 2.084486 | 0.394310  | -1.212908 |
| C | 1.699907 | 1.572042  | -0.313550 |
| H | 2.170384 | 2.480807  | -0.694303 |
| H | 0.621622 | 1.738693  | -0.337896 |
| C | 1.465584 | 0.039194  | 1.647204  |
| C | 2.122986 | 1.316242  | 1.130432  |

|   |           |           |           |
|---|-----------|-----------|-----------|
| H | 1.854020  | 2.164837  | 1.761837  |
| H | 3.212179  | 1.211280  | 1.178143  |
| H | 3.177527  | 0.369503  | -1.266479 |
| H | 0.382709  | 0.179105  | 1.647462  |
| H | 1.761384  | -0.151563 | 2.680803  |
| H | 1.728419  | 0.561260  | -2.232628 |
| H | 1.337876  | -2.064352 | 1.132504  |
| H | 2.922680  | -1.343816 | 0.932903  |
| C | 0.193071  | -1.388953 | -1.193834 |
| H | 0.165337  | -1.277570 | -2.280245 |
| H | 0.076570  | -2.453788 | -0.979951 |
| C | -0.990637 | -0.663807 | -0.605196 |
| C | -1.624429 | -1.148696 | 0.539538  |
| C | -1.493198 | 0.496194  | -1.195110 |
| C | -2.705547 | -0.478549 | 1.099289  |
| H | -1.260783 | -2.060002 | 0.999349  |
| C | -2.573961 | 1.171922  | -0.640864 |
| H | -1.027148 | 0.875980  | -2.096812 |
| C | -3.180894 | 0.689446  | 0.513479  |
| H | -3.179647 | -0.870197 | 1.989645  |
| H | -2.945661 | 2.071955  | -1.112774 |
| H | -4.023713 | 1.212079  | 0.945389  |

eq

```
=====
```

|   |           |           |           |
|---|-----------|-----------|-----------|
| C | 1.196111  | 1.009687  | 0.129949  |
| C | 1.050361  | -0.511309 | 0.044128  |
| H | 0.862540  | -0.775400 | -1.003731 |
| C | 2.350394  | -1.192541 | 0.477646  |
| C | 3.551494  | -0.696304 | -0.326653 |
| H | 4.464301  | -1.181550 | 0.023503  |
| H | 3.421835  | -0.980326 | -1.375807 |
| C | 2.395895  | 1.511856  | -0.673714 |
| C | 3.686555  | 0.822873  | -0.233425 |
| H | 4.526474  | 1.167213  | -0.839416 |
| H | 3.904785  | 1.099608  | 0.803076  |
| H | 2.516649  | -0.982794 | 1.540491  |
| H | 2.225254  | 1.306896  | -1.735378 |
| H | 2.488821  | 2.594429  | -0.570483 |
| H | 2.248644  | -2.275841 | 0.379479  |
| H | 0.282517  | 1.495671  | -0.218209 |
| H | 1.323470  | 1.287648  | 1.183029  |
| C | -0.129810 | -1.025870 | 0.882300  |
| H | -0.133714 | -2.117896 | 0.840488  |
| H | 0.031155  | -0.742187 | 1.925458  |
| C | -1.466626 | -0.507007 | 0.418659  |
| C | -2.134950 | 0.502332  | 1.110018  |
| C | -2.049451 | -1.009642 | -0.746212 |
| C | -3.351055 | 0.999310  | 0.652008  |
| H | -1.697153 | 0.903056  | 2.016406  |
| C | -3.263343 | -0.517427 | -1.208370 |
| H | -1.545813 | -1.798413 | -1.292796 |
| C | -3.918943 | 0.491577  | -0.509893 |
| H | -3.854050 | 1.782624  | 1.203611  |

H -3.700354 -0.923039 -2.111331  
H -4.865156 0.875080 -0.867046

eq2

```

=====
C -1.452702 1.254500 0.168306
C -1.207018 0.000116 1.009701
H -1.945882 0.000224 1.819353
C -1.452750 -1.254444 0.168585
C -2.861901 -1.259677 -0.425616
H -3.007915 -2.151199 -1.038124
H -3.593998 -1.307207 0.386776
C -2.861842 1.259657 -0.425917
C -3.114402 -0.000100 -1.253642
H -4.134171 -0.000133 -1.642700
H -2.442223 -0.000212 -2.117719
H -0.723339 -1.289796 -0.646940
H -3.593961 1.307437 0.386433
H -3.007760 2.151046 -1.038646
H -1.293644 -2.147810 0.777921
H -1.293579 2.147997 0.777452
H -0.723283 1.289660 -0.647219
C 0.173046 0.000157 1.696519
H 0.233444 0.879919 2.340787
H 0.233410 -0.879484 2.340970
C 1.351735 0.000042 0.755643
C 1.907456 -1.197363 0.302300
C 1.907653 1.197392 0.302265
C 2.977602 -1.200838 -0.584929
H 1.498396 -2.137119 0.653374
C 2.977759 1.200687 -0.584931
H 1.498656 2.137186 0.653318
C 3.515046 -0.000140 -1.034652
H 3.393850 -2.141003 -0.922049
H 3.394183 2.140756 -0.922100
H 4.349718 -0.000181 -1.722681

```

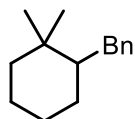

((2,2-dimethylcyclohexyl)methyl)benzene

| Conformation | Electronic Energy | Enthalpy    | Gibbs Free Energy |
|--------------|-------------------|-------------|-------------------|
| ax           | -584.783671       | -584.431218 | -584.486693       |
| ax2          | -584.781414       | -584.429069 | -584.484469       |
| ax3          | -584.777118       | -584.424438 | -584.478472       |

|     |  |             |  |             |  |             |
|-----|--|-------------|--|-------------|--|-------------|
| eq  |  | -584.785787 |  | -584.433625 |  | -584.489819 |
| eq2 |  | -584.781347 |  | -584.428874 |  | -584.483939 |
| eq3 |  | -584.783286 |  | -584.431043 |  | -584.486228 |

ax

```
=====
```

|   |           |           |           |
|---|-----------|-----------|-----------|
| C | -2.239235 | -0.703555 | -0.044878 |
| C | -0.757531 | -0.454108 | 0.356916  |
| H | -0.470796 | -1.263455 | 1.037500  |
| C | -0.608608 | 0.876206  | 1.113832  |
| C | -1.161586 | 2.063008  | 0.323794  |
| H | -1.052358 | 2.978915  | 0.907222  |
| H | -0.580371 | 2.202697  | -0.592461 |
| C | -2.802374 | 0.518174  | -0.795486 |
| C | -2.628118 | 1.836138  | -0.040746 |
| H | -2.999524 | 2.660955  | -0.651666 |
| H | -3.229430 | 1.826348  | 0.872170  |
| H | -1.136502 | 0.811863  | 2.067243  |
| H | -2.299620 | 0.600388  | -1.763849 |
| H | -3.859876 | 0.339253  | -1.008670 |
| H | 0.441780  | 1.042859  | 1.357903  |
| C | 0.208009  | -0.531892 | -0.847974 |
| H | -0.075656 | 0.194971  | -1.610385 |
| H | 0.122509  | -1.519816 | -1.300108 |
| C | -3.069390 | -0.973734 | 1.218110  |
| H | -4.115531 | -1.137517 | 0.950783  |
| H | -2.708206 | -1.872731 | 1.722683  |
| H | -3.035951 | -0.154319 | 1.933647  |
| C | -2.374463 | -1.936122 | -0.943680 |
| H | -1.886429 | -2.805099 | -0.494894 |
| H | -3.429885 | -2.179356 | -1.083042 |
| H | -1.941542 | -1.774011 | -1.930874 |
| C | 1.649658  | -0.312167 | -0.465413 |
| C | 2.342954  | -1.287680 | 0.253978  |
| C | 2.317184  | 0.867322  | -0.791549 |
| C | 3.662148  | -1.088729 | 0.640582  |
| H | 1.841693  | -2.214011 | 0.509579  |
| C | 3.638618  | 1.072101  | -0.407415 |
| H | 1.795247  | 1.633931  | -1.351657 |
| C | 4.315357  | 0.095149  | 0.312282  |
| H | 4.182943  | -1.858624 | 1.194653  |
| H | 4.138739  | 1.994731  | -0.671218 |
| H | 5.343028  | 0.251362  | 0.611328  |

ax2

```
=====
```

|   |           |           |           |
|---|-----------|-----------|-----------|
| C | -1.459620 | -0.930042 | 0.327529  |
| C | -0.845647 | 0.485685  | 0.517399  |
| H | -0.307247 | 0.472190  | 1.469116  |
| C | -1.949316 | 1.552356  | 0.620641  |
| C | -2.876889 | 1.536821  | -0.593803 |
| H | -3.643911 | 2.306042  | -0.488914 |
| H | -2.306952 | 1.778968  | -1.496325 |

|   |           |           |           |
|---|-----------|-----------|-----------|
| C | -2.453309 | -0.929485 | -0.849933 |
| C | -3.520654 | 0.160935  | -0.757186 |
| H | -4.147196 | 0.137591  | -1.650693 |
| H | -4.179918 | -0.031154 | 0.093548  |
| H | -2.544556 | 1.385313  | 1.520747  |
| H | -1.897069 | -0.793831 | -1.782466 |
| H | -2.921577 | -1.915768 | -0.910391 |
| H | -1.484245 | 2.534030  | 0.731752  |
| C | 0.169035  | 0.880523  | -0.583764 |
| H | 0.139564  | 1.968544  | -0.690837 |
| H | -0.132446 | 0.474466  | -1.550025 |
| C | -2.175323 | -1.352883 | 1.617950  |
| H | -2.604482 | -2.350046 | 1.498757  |
| H | -1.466906 | -1.390515 | 2.448584  |
| H | -2.981771 | -0.677522 | 1.898344  |
| C | -0.374587 | -1.971847 | 0.047046  |
| H | 0.392685  | -1.964658 | 0.825045  |
| H | -0.817369 | -2.970137 | 0.019237  |
| H | 0.113883  | -1.799261 | -0.911929 |
| C | 1.607468  | 0.493958  | -0.320256 |
| C | 2.345549  | -0.223548 | -1.260747 |
| C | 2.247936  | 0.885644  | 0.857230  |
| C | 3.676989  | -0.553097 | -1.031708 |
| H | 1.867702  | -0.533851 | -2.182303 |
| C | 3.577757  | 0.559385  | 1.092577  |
| H | 1.701954  | 1.457697  | 1.597645  |
| C | 4.298273  | -0.165477 | 0.149137  |
| H | 4.227263  | -1.114258 | -1.775534 |
| H | 4.053490  | 0.874223  | 2.012117  |
| H | 5.333127  | -0.421636 | 0.331857  |

ax3

```
=====
```

|   |           |           |           |
|---|-----------|-----------|-----------|
| C | -2.052068 | -0.530844 | -0.059607 |
| C | -1.200738 | 0.033150  | 1.116797  |
| H | -1.836293 | -0.085348 | 2.000252  |
| C | -0.943581 | 1.545240  | 0.958329  |
| C | -0.455170 | 1.969940  | -0.430989 |
| H | -0.388131 | 3.059208  | -0.468982 |
| H | 0.549438  | 1.584861  | -0.615897 |
| C | -1.523785 | -0.061823 | -1.426712 |
| C | -1.382377 | 1.454942  | -1.528825 |
| H | -0.987782 | 1.724728  | -2.510141 |
| H | -2.362279 | 1.931629  | -1.441828 |
| H | -1.870885 | 2.083436  | 1.167691  |
| H | -0.546590 | -0.515864 | -1.607979 |
| H | -2.195345 | -0.436505 | -2.204437 |
| H | -0.228209 | 1.866738  | 1.719166  |
| C | 0.086631  | -0.744324 | 1.510942  |
| H | -0.134631 | -1.811170 | 1.533741  |
| H | 0.300958  | -0.452804 | 2.541200  |
| C | -3.497405 | -0.037872 | 0.124105  |
| H | -4.108995 | -0.331146 | -0.732011 |
| H | -3.936401 | -0.483727 | 1.019154  |

|   |           |           |           |
|---|-----------|-----------|-----------|
| H | -3.564681 | 1.044205  | 0.226040  |
| C | -2.100324 | -2.060010 | -0.044480 |
| H | -2.390007 | -2.435691 | 0.939974  |
| H | -2.839158 | -2.412611 | -0.767499 |
| H | -1.141723 | -2.506149 | -0.308318 |
| C | 1.351672  | -0.517660 | 0.717657  |
| C | 2.257749  | 0.469525  | 1.110786  |
| C | 1.667016  | -1.284813 | -0.404199 |
| C | 3.416134  | 0.715198  | 0.383786  |
| H | 2.047603  | 1.056365  | 1.996779  |
| C | 2.824513  | -1.045724 | -1.136094 |
| H | 0.999701  | -2.079389 | -0.712249 |
| C | 3.699820  | -0.036777 | -0.750738 |
| H | 4.099164  | 1.490406  | 0.705477  |
| H | 3.045290  | -1.651493 | -2.005172 |
| H | 4.600433  | 0.151433  | -1.319511 |

eq

```
=====
```

|   |           |           |           |
|---|-----------|-----------|-----------|
| C | -2.118795 | -0.761277 | 0.054264  |
| C | -0.713642 | -0.117161 | -0.088599 |
| H | -0.436384 | -0.228048 | -1.144433 |
| C | -0.724740 | 1.383715  | 0.226109  |
| C | -1.749047 | 2.148974  | -0.607364 |
| H | -1.745804 | 3.204955  | -0.331350 |
| H | -1.465373 | 2.093500  | -1.663255 |
| C | -3.124331 | 0.062846  | -0.774006 |
| C | -3.141879 | 1.550659  | -0.434523 |
| H | -3.860579 | 2.065981  | -1.074393 |
| H | -3.476448 | 1.696909  | 0.596168  |
| H | -0.939873 | 1.527916  | 1.289925  |
| H | -2.865972 | -0.048530 | -1.832965 |
| H | -4.119829 | -0.370108 | -0.644890 |
| H | 0.273101  | 1.792355  | 0.054366  |
| C | 0.365738  | -0.828326 | 0.750235  |
| H | 0.266567  | -1.908596 | 0.637309  |
| H | 0.209977  | -0.597204 | 1.805853  |
| C | -2.569749 | -0.827837 | 1.518015  |
| H | -3.592042 | -1.208560 | 1.573938  |
| H | -1.935059 | -1.503286 | 2.093514  |
| H | -2.550945 | 0.146030  | 2.006874  |
| C | -2.115972 | -2.183203 | -0.516064 |
| H | -1.516405 | -2.868273 | 0.083481  |
| H | -3.134525 | -2.577191 | -0.540733 |
| H | -1.727784 | -2.192829 | -1.537247 |
| C | 1.767085  | -0.432644 | 0.357748  |
| C | 2.536280  | 0.414320  | 1.153877  |
| C | 2.317736  | -0.897452 | -0.838338 |
| C | 3.819133  | 0.790439  | 0.767985  |
| H | 2.125059  | 0.783251  | 2.085835  |
| C | 3.597801  | -0.526094 | -1.228641 |
| H | 1.734539  | -1.560855 | -1.466752 |
| C | 4.354125  | 0.321879  | -0.425352 |
| H | 4.399860  | 1.448666  | 1.400742  |

|   |          |           |           |
|---|----------|-----------|-----------|
| H | 4.007665 | -0.900553 | -2.157430 |
| H | 5.351798 | 0.611436  | -0.726630 |

eq2

```
=====
C -1.446998    0.937888   -0.141440
C -1.049072   -0.104187    0.939629
H -1.757883    0.064432    1.760330
C -1.299324   -1.538998    0.460308
C -2.767130   -1.749592    0.087704
H -2.921713   -2.765028   -0.281627
H -3.379671   -1.639907    0.988305
C -2.932872    0.694918   -0.479378
C -3.225048   -0.728271   -0.951546
H -4.293278   -0.841321   -1.145868
H -2.712530   -0.916931   -1.898485
H -0.671043   -1.770609   -0.402472
H -3.528985    0.899266    0.416608
H -3.242956    1.417051   -1.239204
H -1.012841   -2.236103    1.251745
C  0.333372    0.075238    1.608127
H  0.386016   -0.669173    2.407137
H  0.363297    1.051159    2.093509
C -0.619107    0.845808   -1.432652
H -1.083743    1.466688   -2.202872
H  0.395897    1.209540   -1.285705
H -0.554793   -0.168761   -1.823984
C -1.314308    2.356958    0.414841
H -0.271580    2.625571    0.589273
H -1.728525    3.079062   -0.292607
H -1.855651    2.460656    1.358454
C  1.567573   -0.067464    0.749931
C  2.344740    1.047770    0.433867
C  1.982473   -1.312454    0.272310
C  3.478873    0.933967   -0.361361
H  2.049788    2.020156    0.809839
C  3.113362   -1.432523   -0.527091
H  1.421782   -2.199507    0.537184
C  3.863018   -0.307884   -0.853538
H  4.062598    1.814518   -0.595528
H  3.414390   -2.407175   -0.888231
H  4.744111   -0.400629   -1.474069
```

eq3

```
=====
C -1.233688   -0.834554   -0.139665
C -0.938016    0.685254    0.016307
H -0.743657    1.067899   -0.992863
C -2.148388    1.455145    0.571922
C -3.430968    1.229651   -0.220376
H -4.256145    1.777154    0.238676
H -3.305975    1.627094   -1.232731
C -2.561609   -1.004434   -0.908370
C -3.746681   -0.258792   -0.305605
```



|   |           |           |           |
|---|-----------|-----------|-----------|
| H | -4.637822 | -0.429000 | -0.912525 |
| H | -3.965701 | -0.644487 | 0.694078  |
| H | -2.313379 | 1.159810  | 1.613084  |
| H | -2.410464 | -0.642622 | -1.931678 |
| H | -2.779672 | -2.072971 | -0.981955 |
| H | -1.902573 | 2.519132  | 0.589298  |
| C | 0.270959  | 1.044838  | 0.903690  |
| H | 0.104994  | 0.657230  | 1.910661  |
| H | 0.278949  | 2.134766  | 0.994381  |
| C | -1.320348 | -1.535628 | 1.220840  |
| H | -1.650678 | -2.568078 | 1.086150  |
| H | -0.344142 | -1.563827 | 1.707885  |
| H | -2.019753 | -1.048544 | 1.900786  |
| C | -0.161771 | -1.543761 | -0.978358 |
| H | 0.791352  | -1.625385 | -0.459508 |
| H | -0.497754 | -2.556785 | -1.213860 |
| H | 0.007482  | -1.019837 | -1.921797 |
| C | 1.633798  | 0.612509  | 0.424130  |
| C | 2.123176  | 1.043250  | -0.810462 |
| C | 2.440235  | -0.216046 | 1.201850  |
| C | 3.370477  | 0.636926  | -1.264905 |
| H | 1.515906  | 1.697249  | -1.424981 |
| C | 3.692092  | -0.624982 | 0.753007  |
| H | 2.078592  | -0.554183 | 2.165552  |
| C | 4.159094  | -0.205243 | -0.486047 |
| H | 3.730130  | 0.977745  | -2.226942 |
| H | 4.300027  | -1.272967 | 1.370657  |
| H | 5.130117  | -0.524191 | -0.840109 |

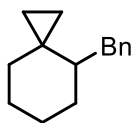

4-benzylspiro[2.5]octane

| Conformation | Electronic Energy | Enthalpy    | Gibbs Free Energy |
|--------------|-------------------|-------------|-------------------|
| ax1          | -583.555416       | -583.226313 | -583.280622       |
| ax2          | -583.555172       | -583.226152 | -583.279779       |
| ax3          | -583.549319       | -583.220017 | -583.27393        |
| eq1          | -583.553941       | -583.224843 | -583.279275       |
| eq2          | -583.549833       | -583.220409 | -583.273616       |
| eq3          | -583.551602       | -583.222463 | -583.277043       |

ax1

```

=====
C   2.185060   -0.663982   -0.106547
C   0.754624   -0.374703    0.323674
H   0.422684   -1.200442    0.960370
C   3.030546   -1.483294    0.826211
C   2.540474   -2.069644   -0.477726
C   0.723171    0.919506    1.149161
C   1.383135    2.092635    0.420083
H   0.808096    2.346939   -0.474897
H   1.370653    2.975882    1.060851
C   2.865752    0.481209   -0.829758
C   2.819504    1.754452    0.017009
H   3.417488    1.601657    0.920921
H   3.267882    2.586935   -0.527779
C  -0.193951   -0.333020   -0.891473
H   0.069625    0.496746   -1.547866
H  -0.049160   -1.253444   -1.461852
C  -1.643309   -0.214099   -0.497260
C  -2.317597   -1.308323    0.047964
C  -2.334958    0.988836   -0.632323
C  -3.643849   -1.204092    0.447381
H  -1.796046   -2.252402    0.155255
C  -3.663355    1.099287   -0.233958
H  -1.826801    1.847309   -1.055304
C  -4.322066    0.002878    0.308610
H  -4.150020   -2.064926    0.864072
H  -4.182712    2.041629   -0.348431
H  -5.355295    0.085613    0.617718
H   2.575373   -1.844321    1.738390
H   4.081137   -1.238136    0.902368
H   3.266244   -2.219567   -1.265305
H   1.758786   -2.815901   -0.425186
H   1.262456    0.741570    2.084200
H   3.897894    0.206178   -1.055803
H   2.367505    0.663613   -1.786981
H  -0.304864    1.169193    1.418966

```

ax2

```

=====
C  -1.167831    0.815898    0.315863
C  -0.943389   -0.639445    0.700429
H  -0.498852   -0.658834    1.700230
C  -1.491358    1.774210    1.429614
C  -0.162388    1.850872    0.718829
C  -2.303160   -1.353647    0.754195
C  -3.098454   -1.195226   -0.544988
H  -2.583303   -1.707633   -1.361813
H  -4.071295   -1.678267   -0.438873
C  -1.934539    1.002822   -0.978419
C  -3.281413    0.279381   -0.908874
H  -3.901078    0.760955   -0.145963
H  -3.811419    0.372445   -1.858299
C   0.026935   -1.380133   -0.244038
H   0.072419   -2.422871    0.079200

```

|   |           |           |           |
|---|-----------|-----------|-----------|
| H | -0.364554 | -1.377687 | -1.261529 |
| C | 1.416267  | -0.798577 | -0.247474 |
| C | 1.852314  | 0.022666  | -1.285726 |
| C | 2.282746  | -1.033263 | 0.821022  |
| C | 3.113463  | 0.607885  | -1.253387 |
| H | 1.192014  | 0.212722  | -2.123551 |
| C | 3.544234  | -0.452263 | 0.859051  |
| H | 1.961517  | -1.675569 | 1.632830  |
| C | 3.962843  | 0.375412  | -0.177918 |
| H | 3.432360  | 1.245362  | -2.067592 |
| H | 4.202005  | -0.646222 | 1.696098  |
| H | 4.944289  | 0.829282  | -0.150444 |
| H | -1.495348 | 1.390783  | 2.441001  |
| H | -2.216641 | 2.551252  | 1.230230  |
| H | 0.002417  | 2.680812  | 0.044861  |
| H | 0.714191  | 1.521749  | 1.259634  |
| H | -2.885888 | -0.925470 | 1.575034  |
| H | -2.081620 | 2.068743  | -1.163717 |
| H | -1.352196 | 0.610646  | -1.818145 |
| H | -2.156647 | -2.411744 | 0.981726  |

ax3

```

=====
C -1.767502 -0.586616 0.113663
C -1.284453 0.156548 -1.128903
H -2.001222 -0.071528 -1.922682
C -3.208740 -1.025236 0.117715
C -2.101217 -2.040866 -0.025173
C -1.352290 1.679222 -0.905544
C -0.820030 2.161225 0.447091
H 0.259916 2.016291 0.507161
H -1.002296 3.233602 0.540030
C -1.234903 -0.092268 1.446930
C -1.480516 1.407344 1.598994
H -2.557897 1.601842 1.594348
H -1.092249 1.759319 2.556172
C 0.056882 -0.353382 -1.708639
H -0.101030 -1.388198 -2.018511
H 0.251790 0.222767 -2.615966
C 1.286774 -0.310846 -0.837678
C 2.128854 0.801358 -0.829529
C 1.624982 -1.399922 -0.033442
C 3.257036 0.840214 -0.018493
H 1.893071 1.648320 -1.463221
C 2.751717 -1.368664 0.779277
H 0.990807 -2.278864 -0.040712
C 3.570032 -0.244294 0.793547
H 3.894821 1.714361 -0.024837
H 2.993652 -2.222888 1.397882
H 4.449262 -0.217906 1.423091
H -3.807732 -0.813403 -0.757109
H -3.740792 -0.991251 1.058590
H -1.899975 -2.688884 0.817082
H -1.968404 -2.498132 -0.996377

```

|   |           |           |           |
|---|-----------|-----------|-----------|
| H | -2.404165 | 1.974764  | -0.969225 |
| H | -1.720273 | -0.649003 | 2.251423  |
| H | -0.162253 | -0.283499 | 1.525402  |
| H | -0.834792 | 2.189387  | -1.721444 |

eq1

```
=====
```

|   |           |           |           |
|---|-----------|-----------|-----------|
| C | -2.152790 | -0.661689 | -0.146873 |
| C | -0.731001 | -0.102491 | -0.181076 |
| H | -0.463225 | 0.012497  | -1.239004 |
| C | -2.435405 | -2.128565 | -0.277663 |
| C | -2.638803 | -1.432660 | 1.048394  |
| C | -0.718298 | 1.292124  | 0.459154  |
| C | -1.726724 | 2.240096  | -0.187039 |
| H | -1.699928 | 3.210355  | 0.311906  |
| H | -1.440706 | 2.409592  | -1.229972 |
| C | -3.159488 | 0.273583  | -0.793458 |
| C | -3.136432 | 1.655573  | -0.144449 |
| H | -3.842039 | 2.320191  | -0.645864 |
| H | -3.460168 | 1.568287  | 0.897389  |
| C | 0.328625  | -1.008075 | 0.467772  |
| H | 0.160013  | -1.049797 | 1.545244  |
| H | 0.232674  | -2.023021 | 0.080667  |
| C | 1.736626  | -0.531588 | 0.209289  |
| C | 2.307288  | -0.675541 | -1.056735 |
| C | 2.491907  | 0.077242  | 1.209925  |
| C | 3.594464  | -0.222596 | -1.316009 |
| H | 1.736236  | -1.152620 | -1.844654 |
| C | 3.781710  | 0.532908  | 0.956178  |
| H | 2.064023  | 0.195887  | 2.198117  |
| C | 4.336978  | 0.385493  | -0.308676 |
| H | 4.020282  | -0.347000 | -2.302947 |
| H | 4.351319  | 1.002787  | 1.747090  |
| H | 5.340071  | 0.737556  | -0.508217 |
| H | -1.615301 | -2.826586 | -0.354859 |
| H | -3.318213 | -2.406705 | -0.836960 |
| H | -3.654372 | -1.258397 | 1.376989  |
| H | -1.939438 | -1.663643 | 1.838979  |
| H | -0.951483 | 1.183674  | 1.524695  |
| H | -2.919792 | 0.372719  | -1.857854 |
| H | -4.156774 | -0.165931 | -0.727944 |
| H | 0.284874  | 1.717271  | 0.394794  |

eq2

```
=====
```

|   |           |           |           |
|---|-----------|-----------|-----------|
| C | -1.540038 | 0.921296  | 0.060566  |
| C | -1.082252 | -0.216705 | 0.970643  |
| H | -1.769984 | -0.199995 | 1.825312  |
| C | -0.971188 | 2.303921  | 0.154900  |
| C | -0.673912 | 1.443238  | -1.052056 |
| C | -1.327092 | -1.547825 | 0.248484  |
| C | -2.802805 | -1.709883 | -0.121646 |
| H | -2.955245 | -2.651957 | -0.651221 |
| H | -3.395170 | -1.760845 | 0.797396  |

|   |           |           |           |
|---|-----------|-----------|-----------|
| C | -3.014972 | 0.794566  | -0.279597 |
| C | -3.297448 | -0.539518 | -0.970976 |
| H | -4.364736 | -0.642602 | -1.174426 |
| H | -2.782990 | -0.553741 | -1.936665 |
| C | 0.314676  | -0.111607 | 1.620208  |
| H | 0.356372  | 0.805149  | 2.209598  |
| H | 0.375485  | -0.938723 | 2.332173  |
| C | 1.537380  | -0.168993 | 0.733425  |
| C | 1.925984  | -1.356109 | 0.107996  |
| C | 2.334108  | 0.961076  | 0.545381  |
| C | 3.047769  | -1.400597 | -0.711322 |
| H | 1.350807  | -2.258106 | 0.271001  |
| C | 3.459549  | 0.922053  | -0.269613 |
| H | 2.065396  | 1.886469  | 1.040058  |
| C | 3.815462  | -0.258512 | -0.910576 |
| H | 3.326717  | -2.330680 | -1.188866 |
| H | 4.058229  | 1.813583  | -0.402334 |
| H | 4.688948  | -0.292199 | -1.547664 |
| H | -0.160678 | 2.484580  | 0.845771  |
| H | -1.651250 | 3.134983  | 0.025496  |
| H | -1.172570 | 1.696325  | -1.978175 |
| H | 0.330009  | 1.064240  | -1.165774 |
| H | -0.721446 | -1.583656 | -0.661709 |
| H | -3.605404 | 0.859556  | 0.640570  |
| H | -3.316841 | 1.627504  | -0.917786 |
| H | -1.006972 | -2.378302 | 0.882340  |

eq3

```
=====
```

|   |           |           |           |
|---|-----------|-----------|-----------|
| C | 1.347008  | 0.766811  | -0.239629 |
| C | 0.939967  | -0.648774 | 0.170440  |
| H | 0.731992  | -1.199846 | -0.753813 |
| C | 0.359686  | 1.873582  | -0.466960 |
| C | 1.262923  | 1.900642  | 0.743851  |
| C | 2.141426  | -1.330993 | 0.843326  |
| C | 3.385612  | -1.330457 | -0.042433 |
| H | 4.218215  | -1.803059 | 0.481567  |
| H | 3.186936  | -1.932947 | -0.934515 |
| C | 2.570291  | 0.771803  | -1.140767 |
| C | 3.758895  | 0.086532  | -0.470515 |
| H | 4.616076  | 0.068616  | -1.145762 |
| H | 4.054589  | 0.664217  | 0.410666  |
| C | -0.287755 | -0.777366 | 1.085466  |
| H | -0.301514 | -1.809951 | 1.445697  |
| H | -0.158696 | -0.153429 | 1.971481  |
| C | -1.637524 | -0.490577 | 0.468971  |
| C | -2.533533 | 0.377909  | 1.091680  |
| C | -2.034284 | -1.107179 | -0.718614 |
| C | -3.784162 | 0.636217  | 0.541439  |
| H | -2.241117 | 0.867165  | 2.013213  |
| C | -3.282007 | -0.851245 | -1.274147 |
| H | -1.363021 | -1.796298 | -1.215622 |
| C | -4.162164 | 0.024645  | -0.647650 |
| H | -4.460658 | 1.317997  | 1.039850  |

|   |           |           |           |
|---|-----------|-----------|-----------|
| H | -3.568544 | -1.338462 | -2.196900 |
| H | -5.132588 | 0.225638  | -1.080971 |
| H | -0.690174 | 1.692932  | -0.301244 |
| H | 0.580150  | 2.564518  | -1.269494 |
| H | 2.076495  | 2.613255  | 0.753571  |
| H | 0.804430  | 1.724494  | 1.706477  |
| H | 2.359304  | -0.807040 | 1.780742  |
| H | 2.329446  | 0.247896  | -2.072262 |
| H | 2.820615  | 1.800925  | -1.405921 |
| H | 1.871796  | -2.355918 | 1.106501  |

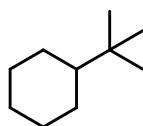

*tert*-butylcyclohexane

| Conformation | Electronic Energy | Enthalpy    | Gibbs Free Energy |
|--------------|-------------------|-------------|-------------------|
| ax           | -393.053126       | -392.756973 | -392.803118       |
| eq           | -393.060569       | -392.764864 | -392.812421       |

ax

|   |           |           |           |
|---|-----------|-----------|-----------|
| C | 0.697218  | -1.259608 | -0.776082 |
| C | -0.172502 | 0.012962  | -0.849206 |
| H | -0.613118 | 0.027009  | -1.851327 |
| C | 0.742996  | 1.251124  | -0.797460 |
| C | 1.749412  | 1.255032  | 0.352433  |
| H | 2.367767  | 2.152989  | 0.292464  |
| H | 1.232317  | 1.292787  | 1.314353  |
| C | 1.769280  | -1.257860 | 0.322452  |
| C | 2.625914  | 0.006148  | 0.286777  |
| H | 3.346656  | -0.004510 | 1.106467  |
| H | 3.200756  | 0.029406  | -0.645031 |
| H | 1.316966  | 1.260130  | -1.730367 |
| H | 1.309933  | -1.340509 | 1.307420  |
| H | 2.400757  | -2.140301 | 0.198711  |
| H | 0.154013  | 2.167187  | -0.797729 |
| C | -1.417123 | 0.008556  | 0.096942  |
| C | -1.144366 | -0.491166 | 1.520804  |
| H | -0.384357 | 0.099079  | 2.031334  |
| H | -2.064715 | -0.424238 | 2.105788  |
| H | -0.829536 | -1.535300 | 1.524971  |
| C | -2.029087 | 1.410052  | 0.188540  |
| H | -1.394313 | 2.092120  | 0.756379  |
| H | -2.188499 | 1.839180  | -0.803380 |
| H | -2.996431 | 1.359660  | 0.692580  |
| C | -2.472522 | -0.919994 | -0.522026 |

|   |           |           |           |
|---|-----------|-----------|-----------|
| H | -3.347482 | -0.989208 | 0.127586  |
| H | -2.801524 | -0.541835 | -1.492179 |
| H | -2.085522 | -1.929900 | -0.666385 |
| H | 0.068342  | -2.146035 | -0.674229 |
| H | 1.212670  | -1.359189 | -1.736471 |

eq

```

=====
C  0.665695    1.256612    0.171331
C -0.071298    0.006200   -0.330278
H  0.009852    0.009309   -1.425793
C  0.663824   -1.242862    0.177159
C  2.130621   -1.256098   -0.255511
H  2.622490   -2.154790    0.121496
H  2.183993   -1.297826   -1.348136
C  2.139039    1.252631   -0.243092
C  2.857408   -0.006442    0.234689
H  3.893843   -0.006814   -0.107884
H  2.881428   -0.013333    1.329239
H  0.625392   -1.260249    1.270866
H  2.200119    1.304436   -1.334994
H  2.635802    2.144258    0.144211
H  0.171685   -2.150554   -0.173235
C -1.594405   -0.001124   -0.018308
C -1.877537   -0.194763    1.475316
H -1.370070    0.556397    2.083061
H -2.949550   -0.103691    1.663615
H -1.565260   -1.181076    1.820462
C -2.232189    1.318528   -0.470147
H -1.932051    2.154203    0.162120
H -1.957243    1.555608   -1.501025
H -3.320192    1.242858   -0.421214
C -2.274094   -1.133812   -0.797835
H -3.352153   -1.114225   -0.625542
H -2.103971   -1.023412   -1.871444
H -1.912109   -2.116230   -0.495438
H  0.192856    2.159641   -0.213902
H  0.602759    1.302282    1.263592

```

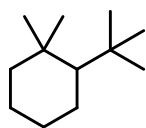

2-(*tert*-butyl)-1,1-dimethylcyclohexane

| Conformation | Electronic Energy | Enthalpy    | Gibbs Free Energy |
|--------------|-------------------|-------------|-------------------|
| ax           | -471.658496       | -471.303011 | -471.353765       |
| eq           | -471.663250       | -471.308237 | -471.359237       |

eq2 | -471.661531 | -471.306305 | -471.357508

ax

```
=====
C -0.926850 0.919674 -0.093120
C 0.217906 0.041104 -0.709625
H 0.469243 0.519512 -1.663127
C -0.378392 -1.336204 -1.084760
C -1.047471 -2.066824 0.078604
H -1.458896 -3.015085 -0.273933
H -0.310305 -2.313822 0.845351
C -1.648087 0.183074 1.055876
C -2.157965 -1.209673 0.683340
H -2.577265 -1.694414 1.567161
H -2.972660 -1.123273 -0.040437
H -1.129691 -1.183662 -1.861147
H -0.975274 0.097590 1.910067
H -2.485894 0.805501 1.383653
H 0.379186 -1.968299 -1.540597
C 1.610168 -0.042749 0.030805
C -1.951033 1.236668 -1.201034
H -2.744225 1.869269 -0.796822
H -1.470850 1.783669 -2.015390
H -2.423437 0.354066 -1.625263
C -0.467407 2.287378 0.425038
H 0.022651 2.863942 -0.361555
H -1.343289 2.853449 0.750907
H 0.208861 2.219948 1.273839
C 1.567388 -0.224101 1.556031
H 1.027722 -1.121625 1.852865
H 2.592041 -0.322972 1.923268
H 1.121811 0.624759 2.069764
C 2.426273 -1.220424 -0.528957
H 2.013312 -2.184734 -0.231133
H 2.477244 -1.190775 -1.619589
H 3.446400 -1.166172 -0.144801
C 2.442873 1.216809 -0.271122
H 3.446577 1.099160 0.143184
H 2.543558 1.364610 -1.348609
H 2.018762 2.120968 0.155892
```

eq

```
=====
C 0.752290 0.953349 -0.018728
C -0.169877 -0.264175 -0.371035
H -0.110026 -0.336865 -1.464951
C 0.429848 -1.570077 0.192405
C 1.845429 -1.852828 -0.295275
H 2.203386 -2.795564 0.123152
H 1.845818 -1.962732 -1.384572
C 2.198519 0.602059 -0.453653
C 2.759154 -0.701429 0.096996
H 3.771132 -0.856512 -0.282208
```



|   |           |           |           |
|---|-----------|-----------|-----------|
| H | 2.832498  | -0.651123 | 1.187232  |
| H | 0.450434  | -1.518161 | 1.283765  |
| H | 2.215119  | 0.548176  | -1.548158 |
| H | 2.843022  | 1.438725  | -0.172962 |
| H | -0.216899 | -2.409913 | -0.059772 |
| C | -1.707642 | -0.217089 | -0.045227 |
| C | 0.741079  | 1.309374  | 1.472242  |
| H | 1.486835  | 2.083772  | 1.669258  |
| H | -0.228457 | 1.703088  | 1.777479  |
| H | 0.973556  | 0.456495  | 2.109998  |
| C | 0.417463  | 2.223737  | -0.820710 |
| H | -0.432655 | 2.772281  | -0.427732 |
| H | 1.275903  | 2.899007  | -0.790854 |
| H | 0.220736  | 1.987512  | -1.868703 |
| C | -2.029248 | -0.662334 | 1.390654  |
| H | -1.488207 | -0.077487 | 2.134231  |
| H | -3.097296 | -0.530906 | 1.577126  |
| H | -1.797277 | -1.714730 | 1.552696  |
| C | -2.361548 | 1.152919  | -0.258970 |
| H | -2.045438 | 1.881372  | 0.486188  |
| H | -2.151782 | 1.553099  | -1.251020 |
| H | -3.444405 | 1.042323  | -0.167745 |
| C | -2.420714 | -1.181859 | -1.008584 |
| H | -3.484485 | -1.232801 | -0.767215 |
| H | -2.327564 | -0.834083 | -2.039646 |
| H | -2.022469 | -2.194843 | -0.956272 |

eq2

```
=====
```

|   |           |           |           |
|---|-----------|-----------|-----------|
| C | 0.738483  | 0.926526  | -0.016032 |
| C | -0.176222 | -0.313896 | -0.321216 |
| H | -0.106954 | -0.443554 | -1.409819 |
| C | 0.465420  | -1.579881 | 0.284345  |
| C | 1.883301  | -1.827407 | -0.234720 |
| H | 2.306951  | -2.708011 | 0.252322  |
| H | 1.821115  | -2.056563 | -1.303709 |
| C | 2.125774  | 0.622745  | -0.630047 |
| C | 2.790415  | -0.618738 | -0.048298 |
| H | 3.754272  | -0.788921 | -0.532033 |
| H | 2.994632  | -0.466812 | 1.014626  |
| H | 0.470213  | -1.520252 | 1.376222  |
| H | 2.008055  | 0.492316  | -1.711229 |
| H | 2.764811  | 1.496937  | -0.482801 |
| H | -0.127372 | -2.453989 | 0.029137  |
| C | -1.720460 | -0.218618 | -0.042545 |
| C | 0.943463  | 1.226123  | 1.481508  |
| H | 1.814791  | 1.876258  | 1.595680  |
| H | 0.094259  | 1.749352  | 1.913246  |
| H | 1.125408  | 0.334797  | 2.078893  |
| C | 0.251161  | 2.218529  | -0.678738 |
| H | -0.646703 | 2.611902  | -0.204556 |
| H | 1.027251  | 2.982577  | -0.587116 |
| H | 0.049147  | 2.072885  | -1.741864 |
| C | -2.432625 | 0.594054  | -1.137284 |

|   |           |           |           |
|---|-----------|-----------|-----------|
| H | -2.233097 | 0.168967  | -2.123730 |
| H | -3.511934 | 0.557985  | -0.973221 |
| H | -2.142617 | 1.639676  | -1.155082 |
| C | -2.358214 | -1.618657 | -0.097487 |
| H | -2.081949 | -2.150016 | -1.011051 |
| H | -2.077567 | -2.235352 | 0.756040  |
| H | -3.444594 | -1.516516 | -0.085551 |
| C | -2.067962 | 0.382791  | 1.323122  |
| H | -3.132699 | 0.240206  | 1.522423  |
| H | -1.510920 | -0.098324 | 2.129271  |
| H | -1.869694 | 1.453018  | 1.358257  |

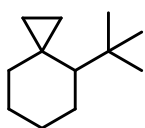

4-(*tert*-butyl)spiro[2.5]octane  
(Chair Conformations)

| Conformation | Electronic Energy | Enthalpy    | Gibbs Free Energy |
|--------------|-------------------|-------------|-------------------|
| ax           | -470.436059       | -470.104485 | -470.154307       |
| ax2          | -470.435040       | -470.103285 | -470.153494       |
| eq           | -470.433291       | -470.101512 | -470.150987       |
| eq2          | -470.430844       | -470.098836 | -470.148435       |

ax

|   |           |           |           |
|---|-----------|-----------|-----------|
| C | -0.926103 | 0.797311  | -0.013210 |
| C | 0.250007  | 0.104525  | 0.672490  |
| H | 0.467639  | 0.714806  | 1.555257  |
| C | -1.874122 | 1.541662  | 0.894506  |
| C | -0.991380 | 2.293381  | -0.066695 |
| C | -0.248990 | -1.263593 | 1.188744  |
| C | -1.031981 | -2.101010 | 0.165216  |
| H | -1.459119 | -2.966151 | 0.676937  |
| H | -0.363529 | -2.495056 | -0.598853 |
| C | -1.609500 | -0.000524 | -1.106022 |
| C | -2.145020 | -1.307328 | -0.519663 |
| H | -2.613297 | -1.914977 | -1.296103 |
| H | -2.922564 | -1.065120 | 0.211015  |
| C | 1.614946  | 0.043894  | -0.095248 |
| H | -1.629009 | 1.599900  | 1.946332  |
| H | -2.931049 | 1.481184  | 0.673287  |
| H | -1.454594 | 2.745718  | -0.933437 |
| H | -0.171777 | 2.855508  | 0.355488  |
| H | 0.584045  | -1.850664 | 1.579924  |
| H | -2.426694 | 0.588169  | -1.528681 |

|   |           |           |           |
|---|-----------|-----------|-----------|
| H | -0.912748 | -0.210450 | -1.921797 |
| H | -0.913359 | -1.068701 | 2.035700  |
| C | 1.768341  | -1.144744 | -1.053203 |
| H | 1.726758  | -2.096500 | -0.523176 |
| H | 1.011508  | -1.152863 | -1.836405 |
| H | 2.744927  | -1.083412 | -1.538582 |
| C | 2.728435  | -0.076140 | 0.956324  |
| H | 3.703346  | -0.155723 | 0.470874  |
| H | 2.745392  | 0.800274  | 1.607213  |
| H | 2.595946  | -0.960339 | 1.582203  |
| C | 1.865159  | 1.326807  | -0.893533 |
| H | 1.837306  | 2.209134  | -0.253527 |
| H | 2.854054  | 1.280856  | -1.354980 |
| H | 1.128074  | 1.458970  | -1.686937 |

ax2

```
=====
```

|   |           |           |           |
|---|-----------|-----------|-----------|
| C | 0.914794  | 0.805200  | -0.003177 |
| C | -0.244335 | 0.080032  | -0.692856 |
| H | -0.480342 | 0.661170  | -1.590078 |
| C | 1.807579  | 1.626132  | -0.899187 |
| C | 0.918292  | 2.302402  | 0.112613  |
| C | 0.310080  | -1.266598 | -1.203328 |
| C | 0.997281  | -2.107931 | -0.127625 |
| H | 1.373742  | -3.031200 | -0.572580 |
| H | 0.279315  | -2.401606 | 0.641724  |
| C | 1.668780  | 0.014910  | 1.057597  |
| C | 2.149095  | -1.328443 | 0.506295  |
| H | 2.620192  | -1.912510 | 1.298838  |
| H | 2.912196  | -1.148787 | -0.257584 |
| C | -1.604570 | 0.017530  | 0.089062  |
| H | 1.532845  | 1.719265  | -1.940914 |
| H | 2.871189  | 1.602408  | -0.705530 |
| H | 1.384993  | 2.737729  | 0.986061  |
| H | 0.074704  | 2.852970  | -0.274656 |
| H | -0.465573 | -1.842575 | -1.704321 |
| H | 2.522198  | 0.607804  | 1.394492  |
| H | 1.044165  | -0.159847 | 1.932978  |
| H | 1.057969  | -1.031410 | -1.967511 |
| C | -1.484640 | -0.241195 | 1.595591  |
| H | -0.990348 | -1.184194 | 1.824067  |
| H | -0.943602 | 0.562905  | 2.095336  |
| H | -2.487227 | -0.280574 | 2.028239  |
| C | -2.508658 | -1.066257 | -0.510563 |
| H | -3.505531 | -0.997174 | -0.070923 |
| H | -2.609585 | -0.947048 | -1.591796 |
| H | -2.127064 | -2.068931 | -0.312812 |
| C | -2.335860 | 1.359769  | -0.072199 |
| H | -2.468096 | 1.614485  | -1.125774 |
| H | -3.325233 | 1.301061  | 0.386532  |
| H | -1.797938 | 2.172762  | 0.412869  |

eq

```
=====
```

|   |           |           |           |
|---|-----------|-----------|-----------|
| C | -0.761824 | 0.838852  | -0.182368 |
| C | 0.173032  | -0.379068 | -0.287993 |
| H | 0.089362  | -0.715781 | -1.330022 |
| C | -0.879242 | 1.660514  | 1.074862  |
| C | -0.355771 | 2.285053  | -0.194833 |
| C | -0.474030 | -1.490334 | 0.560322  |
| C | -1.870472 | -1.840345 | 0.034962  |
| H | -2.322162 | -2.611377 | 0.662105  |
| H | -1.761283 | -2.270603 | -0.965784 |
| C | -2.115660 | 0.521596  | -0.803099 |
| C | -2.788543 | -0.622992 | -0.045828 |
| H | -3.733520 | -0.892594 | -0.521210 |
| H | -3.025103 | -0.281641 | 0.966198  |
| C | 1.708020  | -0.205204 | -0.081736 |
| H | -0.178425 | 1.500092  | 1.878981  |
| H | -1.878936 | 1.924389  | 1.393475  |
| H | -1.002612 | 2.972354  | -0.723752 |
| H | 0.687872  | 2.551969  | -0.211807 |
| H | 0.130871  | -2.394578 | 0.544523  |
| H | -2.747685 | 1.411728  | -0.780488 |
| H | -1.982129 | 0.243704  | -1.853467 |
| H | -0.538774 | -1.162180 | 1.602704  |
| C | 2.102025  | 0.490363  | 1.226762  |
| H | 1.868975  | 1.553924  | 1.227085  |
| H | 1.611508  | 0.028492  | 2.085715  |
| H | 3.180388  | 0.395666  | 1.373265  |
| C | 2.301750  | 0.553310  | -1.278477 |
| H | 3.368413  | 0.726829  | -1.120675 |
| H | 2.192250  | -0.038988 | -2.189890 |
| H | 1.827474  | 1.515926  | -1.451649 |
| C | 2.381038  | -1.588116 | -0.079025 |
| H | 2.028314  | -2.203413 | -0.909911 |
| H | 3.460438  | -1.464949 | -0.185928 |
| H | 2.202824  | -2.130749 | 0.849231  |

eq2

```
=====
```

|   |           |           |           |
|---|-----------|-----------|-----------|
| C | -0.792190 | 0.873169  | -0.157592 |
| C | 0.163550  | -0.316721 | -0.371748 |
| H | 0.103175  | -0.533065 | -1.446511 |
| C | -0.676617 | 1.822350  | 1.002879  |
| C | -0.489862 | 2.327189  | -0.408779 |
| C | -0.437056 | -1.533222 | 0.367094  |
| C | -1.848531 | -1.887001 | -0.088305 |
| H | -2.202855 | -2.768040 | 0.450037  |
| H | -1.837699 | -2.142886 | -1.152623 |
| C | -2.223585 | 0.526812  | -0.564990 |
| C | -2.779173 | -0.704091 | 0.139063  |
| H | -3.786095 | -0.920393 | -0.222545 |
| H | -2.856370 | -0.506867 | 1.212889  |
| C | 1.698720  | -0.217315 | -0.059691 |
| H | 0.210751  | 1.776257  | 1.616350  |
| H | -1.580212 | 2.096167  | 1.531292  |
| H | -1.299968 | 2.901403  | -0.837579 |

|   |           |           |           |
|---|-----------|-----------|-----------|
| H | 0.487812  | 2.657138  | -0.706645 |
| H | 0.211935  | -2.400263 | 0.249419  |
| H | -2.861443 | 1.391826  | -0.374322 |
| H | -2.239603 | 0.352538  | -1.646861 |
| H | -0.468820 | -1.306838 | 1.437101  |
| C | 2.030615  | -0.473494 | 1.418559  |
| H | 1.475115  | 0.181394  | 2.089421  |
| H | 1.825465  | -1.503870 | 1.708192  |
| H | 3.094815  | -0.292893 | 1.584135  |
| C | 2.343256  | 1.114057  | -0.461663 |
| H | 3.429116  | 1.000248  | -0.437476 |
| H | 2.063591  | 1.410099  | -1.473807 |
| H | 2.089958  | 1.919811  | 0.226013  |
| C | 2.404571  | -1.299711 | -0.894996 |
| H | 2.319427  | -1.078380 | -1.960974 |
| H | 3.466277  | -1.331653 | -0.642548 |
| H | 1.993440  | -2.293858 | -0.721946 |

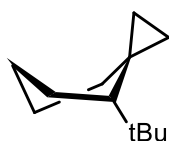

4-(*tert*-butyl)spiro[2.5]octane  
(Twist Boat Conformations)

| Conformation | Electronic Energy | Enthalpy    | Gibbs Free Energy |
|--------------|-------------------|-------------|-------------------|
| ax1          | -470.423180       | -470.091147 | -470.141012       |
| ax2          | -470.430321       | -470.098681 | -470.148818       |
| eq1          | -470.425838       | -470.093978 | -470.144708       |
| eq2          | -470.428177       | -470.096456 | -470.146197       |

ax1

|   |           |           |           |
|---|-----------|-----------|-----------|
| C | 0.223244  | -0.034367 | 0.758660  |
| C | -2.228605 | 0.112958  | -0.084374 |
| C | -1.799972 | 1.370112  | -0.834113 |
| C | -0.841486 | 2.208798  | 0.036700  |
| C | -0.238270 | 1.376360  | 1.174401  |
| H | -2.959571 | -0.453055 | -0.663591 |
| H | -0.997986 | 1.247495  | 1.948045  |
| H | -1.308458 | 1.067957  | -1.760717 |
| H | -2.671225 | 1.960404  | -1.119120 |
| H | -1.381572 | 3.049213  | 0.476383  |
| H | -0.050091 | 2.640049  | -0.578118 |
| H | 0.574135  | 1.922314  | 1.649348  |
| H | -2.724087 | 0.397997  | 0.848038  |
| H | 0.505122  | -0.531552 | 1.691123  |
| C | -1.026385 | -0.782450 | 0.212258  |
| C | -1.379119 | -2.131145 | 0.778976  |
| C | -0.952547 | -2.011990 | -0.658190 |
| H | -2.419501 | -2.338442 | 0.992155  |

|   |           |           |           |
|---|-----------|-----------|-----------|
| H | -0.670702 | -2.577622 | 1.464495  |
| H | -0.000814 | -2.427157 | -0.939406 |
| H | -1.715516 | -2.106323 | -1.419195 |
| C | 1.536685  | -0.064986 | -0.097934 |
| C | 2.261841  | -1.400254 | 0.145597  |
| C | 1.321685  | 0.140436  | -1.602233 |
| C | 2.505890  | 1.027430  | 0.378501  |
| H | 2.574501  | -1.470239 | 1.189801  |
| H | 1.650195  | -2.273259 | -0.069141 |
| H | 3.157966  | -1.461393 | -0.475628 |
| H | 0.907981  | 1.126127  | -1.813728 |
| H | 2.284044  | 0.074094  | -2.115195 |
| H | 0.660419  | -0.606279 | -2.037099 |
| H | 3.474894  | 0.888965  | -0.105514 |
| H | 2.150296  | 2.027744  | 0.129343  |
| H | 2.662205  | 0.977550  | 1.458232  |

ax2

```
=====
```

|   |           |           |           |
|---|-----------|-----------|-----------|
| C | 1.518574  | 0.075765  | 1.215756  |
| C | 1.674968  | -1.434824 | 0.937457  |
| C | 1.623028  | -1.724043 | -0.562621 |
| C | 0.266416  | -1.319302 | -1.159907 |
| C | -0.247308 | 0.071990  | -0.677813 |
| H | 2.610035  | -1.799394 | 1.363689  |
| H | -0.464254 | 0.674178  | -1.564984 |
| H | 2.430187  | -1.185749 | -1.063103 |
| H | 1.792593  | -2.786377 | -0.746024 |
| H | -0.458187 | -2.091780 | -0.901834 |
| H | 0.338458  | -1.326922 | -2.248476 |
| H | 0.872781  | -1.990656 | 1.425346  |
| H | 0.925239  | 0.237936  | 2.117699  |
| H | 2.495233  | 0.524163  | 1.408670  |
| C | 0.896360  | 0.794066  | 0.029126  |
| C | 1.871125  | 1.492527  | -0.887920 |
| C | 0.963745  | 2.291632  | 0.008532  |
| H | 1.653842  | 1.493303  | -1.947623 |
| H | 2.921379  | 1.443339  | -0.636564 |
| H | 1.404261  | 2.782245  | 0.866491  |
| H | 0.154807  | 2.834082  | -0.457817 |
| C | -1.616490 | 0.001244  | 0.068443  |
| C | -2.676896 | -0.454444 | -0.944179 |
| C | -1.649300 | -0.965476 | 1.258214  |
| C | -2.022173 | 1.388396  | 0.575930  |
| H | -2.733452 | 0.240041  | -1.785329 |
| H | -2.461764 | -1.447910 | -1.340094 |
| H | -3.660263 | -0.492344 | -0.471169 |
| H | -0.963449 | -0.665654 | 2.049431  |
| H | -2.655714 | -0.973328 | 1.682839  |
| H | -1.412034 | -1.988475 | 0.966734  |
| H | -3.029156 | 1.347538  | 0.996885  |
| H | -1.345950 | 1.746080  | 1.353049  |
| H | -2.026886 | 2.120500  | -0.233924 |

eq1

```
=====
C  -0.122482    -0.340103    -0.264379
C   2.212477     0.502028     0.411366
C   2.686198    -0.657180    -0.456226
C   1.867990    -1.915765    -0.117069
C   0.491758    -1.553877     0.459120
H   2.852475     1.376723     0.287393
H   0.586161    -1.319085     1.521566
H  -0.001725    -0.522787    -1.339842
H   2.548165    -0.387003    -1.506227
H   3.751375    -0.841477    -0.315477
H   2.408429    -2.526675     0.608327
H   1.738891    -2.528284    -1.011450
H  -0.157153    -2.423524     0.393793
H   2.276492     0.213492     1.464785
C   0.774678     0.885891     0.055474
C   0.671743     2.146389    -0.761941
C   0.327177     2.165840     0.706866
H  -0.143248     2.237510    -1.463729
H   1.594536     2.616229    -1.074080
H   1.036634     2.629617     1.379835
H  -0.702920     2.312968     0.983287
C  -1.663770    -0.246349    -0.043996
C  -2.031813    -0.181726     1.442575
C  -2.293220     0.936847    -0.795716
C  -2.326452    -1.502264    -0.639791
H  -1.732687    -1.094980     1.959075
H  -1.563575     0.659504     1.951664
H  -3.113858    -0.081095     1.552763
H  -2.023329     0.909226    -1.853767
H  -3.380680     0.864683    -0.731249
H  -2.013226     1.908587    -0.398813
H  -3.411952    -1.393695    -0.604590
H  -2.038245    -1.636998    -1.684905
H  -2.076269    -2.411317    -0.096055
```

eq2

```
=====
C  -2.091899     0.536620    -0.877395
C  -2.534193    -0.926683    -0.674163
C  -1.971903    -1.470774     0.638482
C  -0.431859    -1.497768     0.598722
C   0.156858    -0.371767    -0.283277
H  -3.621998    -0.997816    -0.690942
H   0.042003    -0.701394    -1.323331
H  -2.315563    -0.838326     1.458996
H  -2.353868    -2.473575     0.833562
H  -0.103458    -2.461929     0.209155
H  -0.037282    -1.416468     1.614553
H  -2.168223    -1.545746    -1.496690
H  -1.963284     0.740964    -1.943822
H  -2.862016     1.219083    -0.511986
C  -0.786161     0.828891    -0.143219
```

|   |           |           |           |
|---|-----------|-----------|-----------|
| C | -0.934805 | 1.554566  | 1.168244  |
| C | -0.407418 | 2.277362  | -0.045839 |
| H | -0.234364 | 1.337566  | 1.961095  |
| H | -1.938830 | 1.782920  | 1.498744  |
| H | -1.066335 | 2.982994  | -0.535111 |
| H | 0.630026  | 2.568514  | -0.039218 |
| C | 1.692412  | -0.196092 | -0.122278 |
| C | 2.245938  | 0.609065  | -1.305578 |
| C | 2.121915  | 0.459188  | 1.196141  |
| C | 2.352767  | -1.582689 | -0.182767 |
| H | 2.079129  | 0.069762  | -2.240812 |
| H | 1.783352  | 1.589119  | -1.400423 |
| H | 3.322428  | 0.754332  | -1.191869 |
| H | 1.682163  | -0.045594 | 2.057885  |
| H | 3.207556  | 0.389459  | 1.294387  |
| H | 1.860349  | 1.514807  | 1.247286  |
| H | 3.436282  | -1.470078 | -0.254597 |
| H | 2.138805  | -2.174783 | 0.707356  |
| H | 2.013211  | -2.143334 | -1.056663 |

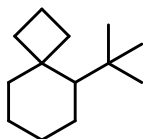

5-(*tert*-butyl)spiro[3.5]nonane

| Conformation | Electronic Energy | Enthalpy    | Gibbs Free Energy |
|--------------|-------------------|-------------|-------------------|
| ax           | -509.737302       | -509.37498  | -509.426401       |
| ax2          | -509.735463       | -509.373229 | -509.424437       |
| ax3          | -509.736747       | -509.374502 | -509.425926       |
| ax4          | -509.732162       | -509.369769 | -509.421304       |
| eq           | -509.735981       | -509.373719 | -509.425195       |
| eq2          | -509.735168       | -509.373031 | -509.424619       |

ax

|   |           |           |           |
|---|-----------|-----------|-----------|
| C | -0.385365 | -0.052935 | -0.704737 |
| H | -0.366497 | -0.661386 | -1.615344 |
| C | -0.395714 | 1.411818  | -1.186125 |
| C | -0.189966 | 2.425095  | -0.061958 |
| H | -0.216662 | 3.438708  | -0.467277 |
| H | -1.004425 | 2.355007  | 0.662596  |
| C | 1.282483  | 0.724198  | 1.094789  |
| C | 1.150017  | 2.175248  | 0.627250  |
| H | 1.280965  | 2.849284  | 1.475859  |



|   |           |           |           |
|---|-----------|-----------|-----------|
| H | 1.951221  | 2.403495  | -0.081384 |
| H | 0.431021  | 1.526192  | -1.895472 |
| H | 0.623486  | 0.559054  | 1.945390  |
| H | 2.299105  | 0.552434  | 1.457733  |
| H | -1.303401 | 1.631936  | -1.744708 |
| C | -1.685934 | -0.532094 | 0.041276  |
| C | 0.976783  | -0.293749 | -0.017706 |
| C | 1.370908  | -1.733099 | 0.415291  |
| C | 2.188702  | -0.346462 | -1.000992 |
| C | 2.780300  | -1.505136 | -0.169881 |
| H | 0.844618  | -2.479470 | -0.175968 |
| H | 1.281027  | -1.981210 | 1.473831  |
| H | 1.875625  | -0.686974 | -1.988912 |
| H | 2.788660  | 0.556534  | -1.108499 |
| H | 3.227412  | -2.332429 | -0.716874 |
| H | 3.489773  | -1.153316 | 0.576150  |
| C | -1.893221 | -2.036486 | -0.205988 |
| H | -1.876998 | -2.268731 | -1.272712 |
| H | -1.134420 | -2.640332 | 0.288098  |
| H | -2.863091 | -2.345283 | 0.190139  |
| C | -1.694115 | -0.333889 | 1.562685  |
| H | -2.644120 | -0.700259 | 1.959573  |
| H | -0.897670 | -0.902174 | 2.043836  |
| H | -1.597186 | 0.710821  | 1.854222  |
| C | -2.917397 | 0.181561  | -0.533208 |
| H | -2.972823 | 0.068624  | -1.618248 |
| H | -3.823088 | -0.252219 | -0.105027 |
| H | -2.917420 | 1.247269  | -0.301178 |

ax2

```
=====
```

|   |           |           |           |
|---|-----------|-----------|-----------|
| C | -1.359195 | 0.865115  | 1.133798  |
| H | -2.346685 | 0.672799  | 1.560897  |
| C | -1.338047 | 2.241634  | 0.474773  |
| C | -0.008312 | 2.470622  | -0.236372 |
| H | -0.005979 | 3.440391  | -0.738074 |
| H | 0.802867  | 2.488232  | 0.496795  |
| C | 0.279928  | -0.055872 | -0.639634 |
| C | 0.220481  | 1.358098  | -1.256320 |
| H | 1.111417  | 1.552425  | -1.849484 |
| H | -0.617301 | 1.380680  | -1.959282 |
| H | -2.146692 | 2.305285  | -0.261023 |
| H | 0.229377  | -0.741015 | -1.492303 |
| H | -1.523938 | 3.017074  | 1.220131  |
| C | -1.037942 | -0.273635 | 0.161977  |
| C | -1.268638 | -1.695652 | 0.753875  |
| C | -2.190575 | -0.606690 | -0.840871 |
| C | -1.976777 | -2.106626 | -0.549955 |
| H | -1.988676 | -1.623568 | 1.571104  |
| H | -0.423840 | -2.283766 | 1.096133  |
| H | -3.151447 | -0.261287 | -0.456730 |
| H | -2.075971 | -0.271580 | -1.870718 |
| H | -2.858869 | -2.738633 | -0.470128 |
| H | -1.282085 | -2.555441 | -1.259424 |

|   |           |           |           |
|---|-----------|-----------|-----------|
| C | 1.640828  | -0.422227 | 0.064900  |
| H | -0.654724 | 0.856947  | 1.966792  |
| C | 1.653149  | -0.221081 | 1.585997  |
| H | 2.616145  | -0.552898 | 1.981082  |
| H | 1.532092  | 0.827925  | 1.856324  |
| H | 0.874607  | -0.794082 | 2.088083  |
| C | 1.969751  | -1.894859 | -0.238666 |
| H | 1.189171  | -2.579476 | 0.085914  |
| H | 2.108141  | -2.037010 | -1.312603 |
| H | 2.897266  | -2.185467 | 0.259553  |
| C | 2.809445  | 0.393108  | -0.508372 |
| H | 3.744201  | 0.037355  | -0.069977 |
| H | 2.886219  | 0.277246  | -1.590974 |
| H | 2.720144  | 1.456263  | -0.282860 |

ax3

```
=====
```

|   |           |           |           |
|---|-----------|-----------|-----------|
| C | 0.387791  | -0.086409 | 0.673973  |
| H | 0.358444  | -0.722226 | 1.565688  |
| C | 0.400587  | 1.373977  | 1.179722  |
| C | 0.063847  | 2.435930  | 0.121085  |
| H | -0.057971 | 3.399830  | 0.620242  |
| H | 0.890869  | 2.556386  | -0.574576 |
| C | -1.215661 | 0.658301  | -1.159704 |
| C | -1.203309 | 2.107748  | -0.669777 |
| H | -1.299289 | 2.791111  | -1.515653 |
| H | -2.077816 | 2.275492  | -0.037568 |
| H | -0.340997 | 1.450930  | 1.980438  |
| H | -0.448818 | 0.509878  | -1.925070 |
| H | -2.175989 | 0.440927  | -1.634414 |
| H | 1.364395  | 1.608664  | 1.635615  |
| C | 1.716000  | -0.514669 | -0.045895 |
| C | -0.974605 | -0.323825 | -0.010050 |
| C | -1.422533 | -1.768145 | -0.379107 |
| C | -2.180567 | -0.303557 | 0.984675  |
| C | -2.816769 | -1.470140 | 0.204237  |
| H | -0.907292 | -2.508308 | 0.230878  |
| H | -1.357795 | -2.059758 | -1.427076 |
| H | -1.860397 | -0.623764 | 1.977394  |
| H | -2.755158 | 0.615892  | 1.078953  |
| H | -3.292797 | -2.258516 | 0.783619  |
| H | -3.515072 | -1.119949 | -0.553675 |
| C | 1.544453  | -1.792101 | -0.873980 |
| H | 1.165921  | -2.618178 | -0.272625 |
| H | 0.868827  | -1.639629 | -1.716146 |
| H | 2.514640  | -2.092890 | -1.275772 |
| C | 2.341318  | 0.543830  | -0.965583 |
| H | 3.244624  | 0.126201  | -1.415921 |
| H | 1.677840  | 0.842377  | -1.776281 |
| H | 2.636672  | 1.435666  | -0.413058 |
| C | 2.747732  | -0.815411 | 1.053315  |
| H | 2.424780  | -1.656256 | 1.670220  |
| H | 3.712242  | -1.072024 | 0.610133  |
| H | 2.900429  | 0.044968  | 1.707184  |

ax4

```
=====
C  1.190885    0.808791   -1.255237
H  2.101003    0.623331   -1.831097
C  1.283107    2.171516   -0.568733
C  0.054588    2.441464    0.297845
H  0.213187    3.344041    0.892279
H -0.790468    2.649492   -0.355195
C -0.283892   -0.129122    0.600100
C -0.268643    1.278869    1.249626
H -1.223442    1.471016    1.741321
H  0.479725    1.281747    2.043901
H  2.181351    2.186252    0.055490
H -0.199976   -0.848630    1.422578
H  1.401306    2.966603   -1.307168
C  1.030065   -0.292579   -0.211960
C  1.420067   -1.738099   -0.666010
C  2.252526   -0.382327    0.766517
C  2.254397   -1.912349    0.614124
H  2.063478   -1.674882   -1.545212
H  0.650714   -2.474531   -0.853761
H  3.138080    0.060641    0.308409
H  2.136947    0.021949    1.770210
H  3.219226   -2.407634    0.524693
H  1.681378   -2.397352    1.403395
C -1.681563   -0.456864   -0.050723
H  0.357317    0.793401   -1.963111
C -2.346415    0.712974   -0.792932
H -3.304947    0.372922   -1.190646
H -2.550980    1.552984   -0.130204
H -1.751736    1.070727   -1.632491
C -1.647113   -1.637488   -1.025519
H -1.003517   -1.440748   -1.884016
H -1.312575   -2.554099   -0.540054
H -2.657379   -1.816530   -1.400057
C -2.627276   -0.851035    1.096286
H -3.629593   -1.047907    0.710088
H -2.274816   -1.754974    1.596776
H -2.708681   -0.060321    1.843575
```

eq

```
=====
C  0.370804   -0.531241    0.268628
H  0.373338   -0.923290    1.294714
C -0.064787   -1.711703   -0.620297
C -1.310131   -2.390824   -0.043427
H -1.615308   -3.223552   -0.680216
H -1.044835   -2.816128    0.929721
C -2.020057   -0.144705    0.861566
C -2.466948   -1.412515    0.134315
H -3.284911   -1.886518    0.680412
H -2.863909   -1.146985   -0.848382
H -0.267183   -1.357183   -1.636846
```

|   |           |           |           |
|---|-----------|-----------|-----------|
| H | -1.778216 | -0.382176 | 1.902708  |
| H | -2.842265 | 0.574738  | 0.884384  |
| H | 0.723017  | -2.457161 | -0.696231 |
| C | 1.844011  | -0.051715 | 0.054652  |
| C | -0.782061 | 0.505260  | 0.214923  |
| C | -0.636777 | 1.957572  | 0.753962  |
| C | -1.203636 | 1.120634  | -1.157613 |
| C | -1.480014 | 2.460293  | -0.438214 |
| H | 0.372906  | 2.345250  | 0.683128  |
| H | -1.016087 | 2.136762  | 1.761246  |
| H | -0.381058 | 1.199137  | -1.861639 |
| H | -2.047344 | 0.652670  | -1.662178 |
| H | -1.127060 | 3.363330  | -0.932141 |
| H | -2.531585 | 2.586034  | -0.189184 |
| C | 2.767816  | -1.259124 | -0.176164 |
| H | 2.600448  | -2.037482 | 0.571760  |
| H | 2.633214  | -1.698462 | -1.164605 |
| H | 3.808104  | -0.937007 | -0.097435 |
| C | 2.040910  | 0.893368  | -1.135960 |
| H | 3.107574  | 1.091821  | -1.264899 |
| H | 1.676304  | 0.443580  | -2.061334 |
| H | 1.542673  | 1.852950  | -1.003636 |
| C | 2.353292  | 0.614863  | 1.344088  |
| H | 2.416434  | -0.124800 | 2.145525  |
| H | 3.354993  | 1.021121  | 1.187362  |
| H | 1.716243  | 1.422373  | 1.695008  |

eq2

```
=====
```

|   |           |           |           |
|---|-----------|-----------|-----------|
| C | -2.176148 | 0.252560  | -0.740236 |
| H | -2.094244 | -0.028147 | -1.796806 |
| C | -2.774856 | -0.904383 | 0.048127  |
| C | -1.826210 | -2.093565 | 0.024961  |
| H | -2.206421 | -2.904758 | 0.648975  |
| H | -1.753338 | -2.481127 | -0.996254 |
| C | 0.172554  | -0.536993 | -0.344270 |
| C | -0.439552 | -1.673014 | 0.504006  |
| H | 0.211165  | -2.543856 | 0.505705  |
| H | -0.517239 | -1.339137 | 1.543187  |
| H | -2.932702 | -0.590482 | 1.085207  |
| H | 0.112269  | -0.852808 | -1.394580 |
| H | -3.752822 | -1.172648 | -0.355847 |
| C | -0.788840 | 0.684143  | -0.242459 |
| C | -0.379648 | 2.041650  | -0.889282 |
| C | -0.837177 | 1.414594  | 1.135227  |
| C | -0.108219 | 2.627290  | 0.513706  |
| H | -1.252975 | 2.507617  | -1.346243 |
| H | 0.425442  | 2.052888  | -1.615835 |
| H | -1.863421 | 1.653914  | 1.416725  |
| H | -0.355733 | 0.926330  | 1.979507  |
| H | -0.531965 | 3.608298  | 0.719758  |
| H | 0.950429  | 2.649458  | 0.764782  |
| C | 1.714605  | -0.409203 | -0.074517 |
| H | -2.840593 | 1.118345  | -0.693692 |

|   |          |           |           |
|---|----------|-----------|-----------|
| C | 2.074397 | -0.125626 | 1.389421  |
| H | 3.157447 | -0.200154 | 1.513852  |
| H | 1.780464 | 0.874976  | 1.702124  |
| H | 1.616866 | -0.847324 | 2.067189  |
| C | 2.393979 | 0.651172  | -0.953433 |
| H | 3.476975 | 0.531938  | -0.883443 |
| H | 2.114957 | 0.535394  | -2.003032 |
| H | 2.164431 | 1.666674  | -0.643279 |
| C | 2.377100 | -1.748436 | -0.459974 |
| H | 2.066603 | -2.068732 | -1.457369 |
| H | 3.461430 | -1.628254 | -0.469585 |
| H | 2.151067 | -2.549540 | 0.241286  |

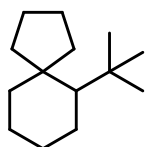

6-(*tert*-butyl)spiro[4.5]decane

| Conformation | Electronic Energy | Enthalpy    | Gibbs Free Energy |
|--------------|-------------------|-------------|-------------------|
| ax           | -549.068507       | -548.674871 | -548.728109       |
| ax2          | -549.065953       | -548.672462 | -548.72622        |
| ax3          | -549.067062       | -548.673318 | -548.726266       |
| eq           | -549.067547       | -548.674182 | -548.727211       |
| eq2          | -549.066914       | -548.673464 | -548.727224       |
| eq3          | -549.066908       | -548.67346  | -548.727932       |
| eq4          | -549.066909       | -548.67346  | -548.727907       |

ax

|   |           |           |           |
|---|-----------|-----------|-----------|
| C | -0.615001 | -0.014913 | -0.717336 |
| H | -0.530992 | -0.549399 | -1.670200 |
| C | -0.883043 | 1.459475  | -1.091780 |
| C | -0.805245 | 2.418776  | 0.094751  |
| H | -0.989028 | 3.440183  | -0.245389 |
| H | -1.589393 | 2.186146  | 0.818079  |
| C | 0.946610  | 0.891659  | 1.109232  |

|   |           |           |           |
|---|-----------|-----------|-----------|
| C | 0.565889  | 2.333737  | 0.763089  |
| H | 0.588287  | 2.943720  | 1.668335  |
| H | 1.312311  | 2.757805  | 0.086254  |
| H | -0.127161 | 1.761259  | -1.820980 |
| H | 0.332566  | 0.550792  | 1.942056  |
| H | 1.979136  | 0.873075  | 1.465148  |
| H | -1.838865 | 1.561611  | -1.600474 |
| C | -1.820394 | -0.737083 | 0.001440  |
| C | 0.802179  | -0.091421 | -0.074574 |
| C | 1.264003  | -1.500232 | 0.346533  |
| C | 1.893036  | 0.227799  | -1.130999 |
| C | 2.795047  | -1.417385 | 0.455737  |
| H | 1.002607  | -2.201500 | -0.448579 |
| H | 0.800627  | -1.852552 | 1.267378  |
| C | 3.210405  | -0.317765 | -0.550999 |
| H | 1.965162  | 1.285034  | -1.376605 |
| H | 1.643120  | -0.303281 | -2.052967 |
| H | 3.094484  | -1.144421 | 1.467283  |
| H | 3.261075  | -2.376658 | 0.235144  |
| H | 3.767360  | 0.472806  | -0.048414 |
| H | 3.855078  | -0.707234 | -1.337678 |
| C | -3.150070 | -0.213559 | -0.564431 |
| H | -3.970870 | -0.823925 | -0.183727 |
| H | -3.342194 | 0.818921  | -0.270551 |
| H | -3.169818 | -0.268238 | -1.655210 |
| C | -1.892522 | -0.596533 | 1.529158  |
| H | -1.042120 | -1.061389 | 2.025107  |
| H | -1.954343 | 0.440089  | 1.855299  |
| H | -2.792538 | -1.105822 | 1.882956  |
| C | -1.788720 | -2.244344 | -0.309816 |
| H | -1.733498 | -2.422946 | -1.385765 |
| H | -0.950862 | -2.749963 | 0.163590  |
| H | -2.703179 | -2.713368 | 0.059877  |

ax2

```
=====
```

|   |           |           |           |
|---|-----------|-----------|-----------|
| C | -0.908676 | 1.234496  | 1.256479  |
| C | -0.418690 | -0.092938 | 0.636167  |
| C | 0.635703  | 1.381151  | -1.195129 |
| H | 1.598062  | 1.625038  | -1.653981 |
| H | -0.012441 | 1.040431  | -2.004344 |
| C | -1.222494 | 2.317706  | 0.227916  |
| C | 0.035565  | 2.640339  | -0.572270 |
| H | -0.175941 | 3.373059  | -1.353496 |
| H | 0.766352  | 3.098940  | 0.100516  |
| H | -2.020028 | 1.989040  | -0.442078 |
| H | -1.585945 | 3.214393  | 0.734287  |
| H | -1.762907 | 1.060660  | 1.906377  |
| H | -0.117777 | 1.619650  | 1.905372  |
| C | 0.871526  | 0.223695  | -0.202775 |
| C | 2.026629  | 0.590348  | 0.799722  |
| C | 1.472712  | -0.983810 | -0.965152 |
| C | 3.141303  | -0.456852 | 0.617837  |
| H | 1.663388  | 0.552769  | 1.825954  |

|   |           |           |           |
|---|-----------|-----------|-----------|
| H | 2.397115  | 1.602286  | 0.634099  |
| C | 2.414904  | -1.662532 | 0.022978  |
| H | 2.075949  | -0.591094 | -1.789887 |
| H | 0.737732  | -1.646563 | -1.405397 |
| H | 3.883389  | -0.101798 | -0.100472 |
| H | 3.662722  | -0.673892 | 1.549613  |
| H | 3.084889  | -2.383359 | -0.445493 |
| H | 1.844866  | -2.183792 | 0.797129  |
| C | -1.563726 | -0.968791 | -0.005123 |
| H | -0.077784 | -0.699304 | 1.481964  |
| C | -1.845262 | -0.728592 | -1.496707 |
| H | -0.990889 | -0.945714 | -2.134127 |
| H | -2.660798 | -1.385521 | -1.808720 |
| H | -2.159314 | 0.295638  | -1.693305 |
| C | -2.893900 | -0.741208 | 0.732512  |
| H | -3.631415 | -1.460576 | 0.371068  |
| H | -2.785432 | -0.888674 | 1.808755  |
| H | -3.294250 | 0.258590  | 0.561424  |
| C | -1.235577 | -2.459711 | 0.203388  |
| H | -0.293831 | -2.764227 | -0.246292 |
| H | -1.180751 | -2.686887 | 1.270336  |
| H | -2.025055 | -3.078908 | -0.228360 |

ax3

```
=====
```

|   |           |           |           |
|---|-----------|-----------|-----------|
| C | -0.493570 | 1.493977  | 1.239894  |
| H | -1.393243 | 1.802881  | 1.779037  |
| C | 0.102514  | 2.694270  | 0.505275  |
| C | 1.289587  | 2.274776  | -0.358151 |
| H | 1.656839  | 3.127714  | -0.932838 |
| H | 2.114328  | 1.946636  | 0.278827  |
| C | 0.325724  | -0.106452 | -0.601025 |
| C | 0.875381  | 1.154600  | -1.309387 |
| H | 1.698312  | 0.892222  | -1.969222 |
| H | 0.096109  | 1.548340  | -1.964179 |
| H | -0.660653 | 3.143245  | -0.137780 |
| H | -0.103333 | -0.721088 | -1.399872 |
| H | 0.399544  | 3.459788  | 1.224700  |
| C | -0.876919 | 0.331506  | 0.307672  |
| C | -1.551539 | -0.806030 | 1.102089  |
| C | -2.077941 | 0.731958  | -0.590783 |
| C | -2.376108 | -1.606964 | 0.083248  |
| H | -2.233429 | -0.331740 | 1.813897  |
| H | -0.869651 | -1.418087 | 1.684791  |
| C | -2.741612 | -0.586570 | -1.022408 |
| H | -1.814737 | 1.358539  | -1.439247 |
| H | -2.773904 | 1.305731  | 0.027178  |
| H | -1.790529 | -2.424659 | -0.334787 |
| H | -3.258474 | -2.049277 | 0.543967  |
| H | -2.356956 | -0.914355 | -1.988150 |
| H | -3.818653 | -0.468988 | -1.134374 |
| C | 1.447354  | -1.033868 | 0.016030  |
| H | 0.216117  | 1.152524  | 1.993758  |

|   |          |           |           |
|---|----------|-----------|-----------|
| C | 1.865171 | -0.720524 | 1.460663  |
| H | 1.047405 | -0.836621 | 2.169180  |
| H | 2.653284 | -1.418090 | 1.754801  |
| H | 2.265191 | 0.286742  | 1.566361  |
| C | 0.998223 | -2.505547 | -0.034777 |
| H | 0.151162 | -2.715983 | 0.612438  |
| H | 0.727497 | -2.792468 | -1.053206 |
| H | 1.820151 | -3.149807 | 0.285048  |
| C | 2.724610 | -0.965311 | -0.837779 |
| H | 3.431725 | -1.718818 | -0.486325 |
| H | 2.515358 | -1.169192 | -1.890038 |
| H | 3.215283 | 0.005884  | -0.767327 |

eq

```
=====
```

|   |           |           |           |
|---|-----------|-----------|-----------|
| C | 0.263276  | -1.885687 | 0.577719  |
| C | 0.477244  | -0.634338 | -0.299675 |
| H | 0.564665  | -0.995711 | -1.333507 |
| C | -1.977944 | -0.721167 | -0.815943 |
| H | -2.912413 | -0.153652 | -0.795835 |
| H | -1.766343 | -0.938398 | -1.868920 |
| C | -0.840646 | -2.787584 | 0.029394  |
| C | -2.159042 | -2.033914 | -0.062381 |
| H | -2.919930 | -2.640973 | -0.557218 |
| H | -2.527056 | -1.834793 | 0.947379  |
| H | -0.548079 | -3.134846 | -0.966828 |
| H | -0.948767 | -3.674412 | 0.657042  |
| H | 1.176185  | -2.470094 | 0.648525  |
| H | 0.007392  | -1.580415 | 1.597385  |
| C | 1.876399  | 0.032769  | -0.026708 |
| C | -0.851951 | 0.197307  | -0.279876 |
| C | -1.251982 | 0.731261  | 1.131617  |
| C | -0.855697 | 1.470639  | -1.176879 |
| C | -1.689931 | 2.189308  | 0.931445  |
| H | -0.411609 | 0.688466  | 1.818790  |
| H | -2.046673 | 0.134374  | 1.578000  |
| C | -0.820227 | 2.671144  | -0.229619 |
| H | -1.806091 | 1.504259  | -1.715430 |
| H | -0.074153 | 1.465677  | -1.930900 |
| H | -2.740907 | 2.227417  | 0.634337  |
| H | -1.580856 | 2.789029  | 1.835132  |
| H | -1.189423 | 3.585878  | -0.693755 |
| H | 0.192173  | 2.864479  | 0.128618  |
| C | 2.242812  | 1.093872  | -1.076611 |
| H | 2.131236  | 0.701270  | -2.089978 |
| H | 1.652992  | 2.001057  | -0.990886 |
| H | 3.288646  | 1.378816  | -0.945289 |
| C | 2.963759  | -1.055620 | -0.154902 |
| H | 3.943066  | -0.581624 | -0.234592 |
| H | 2.998674  | -1.717424 | 0.708790  |
| H | 2.812202  | -1.666001 | -1.048587 |
| C | 2.030543  | 0.661791  | 1.363589  |
| H | 3.079746  | 0.921642  | 1.524869  |
| H | 1.448520  | 1.576599  | 1.469960  |



H 1.737118 -0.029303 2.155877

eq2

```
=====
C 0.723515 0.377163 -0.386055
H 0.835179 0.578626 -1.459829
C 0.912480 1.725654 0.347236
C -0.020468 2.832797 -0.126432
H 0.185029 3.752529 0.424938
H 0.162619 3.043514 -1.185025
C -1.680048 1.074863 -0.668382
C -1.464901 2.394599 0.057811
H -2.156735 3.146151 -0.327690
H -1.679903 2.282105 1.124569
H 0.737666 1.571509 1.415394
H -1.500211 1.242769 -1.735689
H -2.721875 0.764877 -0.579685
H 1.945318 2.057904 0.250418
C 1.934762 -0.563962 -0.016997
C -0.757640 -0.093930 -0.226688
C -1.216804 -1.292919 -1.091473
C -1.141742 -0.584587 1.182109
C -2.540935 -1.769309 -0.451623
H -0.504884 -2.105884 -1.061121
H -1.338451 -1.004015 -2.137057
C -2.515171 -1.253790 1.010642
H -1.148257 0.206146 1.932569
H -0.418104 -1.334454 1.502115
H -3.404376 -1.371830 -0.983385
H -2.619303 -2.854795 -0.491072
H -3.315445 -0.532769 1.175943
H -2.660126 -2.057657 1.730915
C 2.321972 -0.496624 1.470855
H 1.486117 -0.728146 2.130338
H 3.111300 -1.225057 1.667697
H 2.708479 0.483373 1.748315
C 1.749481 -2.044046 -0.372475
H 0.990478 -2.529897 0.239776
H 1.494926 -2.179134 -1.424048
H 2.693271 -2.564445 -0.194503
C 3.150109 -0.089621 -0.834278
H 4.035664 -0.664242 -0.554872
H 2.977150 -0.238719 -1.902089
H 3.376822 0.963815 -0.672437
```

eq3

```
=====
C -2.484025 1.627076 0.135075
C -2.153776 0.384999 -0.677658
H -2.062020 0.674299 -1.730155
C 0.324973 0.691134 -0.374989
H 0.324787 0.980645 -1.434368
C -1.337088 2.618770 0.012460
C -0.030966 1.956477 0.437740
```

|   |           |           |           |
|---|-----------|-----------|-----------|
| H | 0.774568  | 2.684627  | 0.370149  |
| H | -0.116499 | 1.691027  | 1.494395  |
| H | -1.258449 | 2.954096  | -1.026710 |
| H | -1.518679 | 3.505477  | 0.623060  |
| H | -3.421811 | 2.065018  | -0.212309 |
| H | -2.624936 | 1.360231  | 1.187266  |
| C | -0.852638 | -0.341644 | -0.259765 |
| C | -1.028631 | -0.959731 | 1.155760  |
| C | -0.734076 | -1.578680 | -1.206075 |
| C | -0.462966 | -2.379866 | 1.089502  |
| H | -2.097399 | -1.022944 | 1.378526  |
| H | -0.579628 | -0.360670 | 1.946061  |
| C | -0.817598 | -2.842788 | -0.326888 |
| H | 0.178959  | -1.553842 | -1.788413 |
| H | -1.551352 | -1.569470 | -1.927466 |
| H | 0.617195  | -2.372605 | 1.230121  |
| H | -0.883097 | -3.029256 | 1.858003  |
| H | -0.171934 | -3.645900 | -0.683328 |
| H | -1.840528 | -3.224318 | -0.331150 |
| H | -2.969955 | -0.340184 | -0.621463 |
| C | 1.817319  | 0.281046  | -0.077888 |
| C | 2.131588  | 0.154825  | 1.420377  |
| H | 1.570330  | -0.645319 | 1.899268  |
| H | 3.193265  | -0.070015 | 1.545142  |
| H | 1.930776  | 1.081577  | 1.957509  |
| C | 2.276023  | -1.012079 | -0.768375 |
| H | 2.160992  | -0.947014 | -1.851913 |
| H | 3.338212  | -1.158646 | -0.561290 |
| H | 1.752162  | -1.898268 | -0.419437 |
| C | 2.736348  | 1.381782  | -0.646030 |
| H | 3.778082  | 1.067227  | -0.559817 |
| H | 2.527259  | 1.557520  | -1.703507 |
| H | 2.642775  | 2.328783  | -0.117653 |

eq4

```
=====
```

|   |           |           |           |
|---|-----------|-----------|-----------|
| C | 2.153929  | 0.384206  | -0.677599 |
| H | 2.062083  | 0.673223  | -1.730181 |
| C | 2.484715  | 1.626499  | 0.134727  |
| C | 1.337829  | 2.618267  | 0.012519  |
| H | 1.519792  | 3.504932  | 0.623071  |
| H | 1.258779  | 2.953633  | -1.026601 |
| C | -0.324658 | 0.691184  | -0.374638 |
| C | 0.031818  | 1.956232  | 0.438323  |
| H | -0.773508 | 2.684651  | 0.371232  |
| H | 0.117655  | 1.690598  | 1.494928  |
| H | 2.626112  | 1.359933  | 1.186926  |
| H | -0.324266 | 0.980955  | -1.433951 |
| H | 3.422375  | 2.064306  | -0.213157 |
| C | 0.852678  | -0.342005 | -0.259476 |
| C | 0.733756  | -1.578849 | -1.205967 |
| C | 1.028390  | -0.960356 | 1.155938  |
| C | 0.817092  | -2.842910 | -0.326759 |
| H | 1.550791  | -1.569768 | -1.927654 |

|   |           |           |           |
|---|-----------|-----------|-----------|
| H | -0.179459 | -1.553990 | -1.788046 |
| C | 0.461250  | -2.379841 | 1.089282  |
| H | 0.580139  | -0.360939 | 1.946375  |
| H | 2.097116  | -1.024804 | 1.378597  |
| H | 0.172123  | -3.646351 | -0.683735 |
| H | 1.840165  | -3.224143 | -0.330119 |
| H | -0.619077 | -2.371460 | 1.228727  |
| H | 0.879936  | -3.029656 | 1.858213  |
| H | 2.969852  | -0.341270 | -0.621470 |
| C | -1.817241 | 0.281654  | -0.077929 |
| C | -2.131657 | 0.154273  | 1.420167  |
| H | -1.931261 | 1.080653  | 1.958137  |
| H | -3.193310 | -0.070925 | 1.544611  |
| H | -1.570198 | -0.646122 | 1.898438  |
| C | -2.276631 | -1.010615 | -0.769671 |
| H | -2.160957 | -0.944894 | -1.853095 |
| H | -1.753860 | -1.897614 | -0.421072 |
| H | -3.339090 | -1.156403 | -0.563356 |
| C | -2.735648 | 1.383352  | -0.645298 |
| H | -2.526464 | 1.559597  | -1.702696 |
| H | -3.777537 | 1.069232  | -0.559331 |
| H | -2.641662 | 2.330081  | -0.116500 |

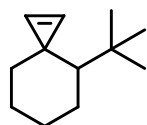

4-(*tert*-butyl)spiro[2.5]oct-1-ene

| Conformation | Electronic Energy | Enthalpy    | Gibbs Free Energy |
|--------------|-------------------|-------------|-------------------|
| ax           | -469.167658       | -468.86162  | -468.911439       |
| ax2          | -469.166854       | -468.860647 | -468.910623       |
| eq           | -469.168772       | -468.86294  | -468.913879       |

ax

|   |           |           |           |
|---|-----------|-----------|-----------|
| C | 0.906371  | 0.883980  | -0.003228 |
| C | -0.226133 | 0.090981  | -0.675228 |
| H | -0.477589 | 0.667800  | -1.570059 |
| C | 1.683319  | 1.853846  | -0.863296 |
| C | 0.895068  | 2.385268  | 0.008792  |
| C | 0.339561  | -1.259389 | -1.168970 |
| C | 1.192476  | -2.026750 | -0.150003 |
| H | 1.640482  | -2.890325 | -0.646257 |
| H | 0.570843  | -2.418964 | 0.654776  |

|   |           |           |           |
|---|-----------|-----------|-----------|
| C | 1.677923  | 0.117995  | 1.062548  |
| C | 2.283652  | -1.149427 | 0.459066  |
| H | 2.840121  | -1.708112 | 1.213956  |
| H | 2.998330  | -0.860638 | -0.318622 |
| C | -1.583575 | -0.014625 | 0.095213  |
| H | -0.467341 | -1.900195 | -1.529795 |
| H | 2.461067  | 0.759568  | 1.469474  |
| H | 1.019551  | -0.151840 | 1.893379  |
| H | 0.974068  | -1.048178 | -2.035324 |
| C | -1.661393 | -1.149669 | 1.122879  |
| H | -1.567774 | -2.126935 | 0.647990  |
| H | -0.898142 | -1.068097 | 1.895739  |
| H | -2.635693 | -1.117411 | 1.616225  |
| C | -2.690925 | -0.258264 | -0.940750 |
| H | -3.657688 | -0.368948 | -0.445171 |
| H | -2.762164 | 0.579294  | -1.637591 |
| H | -2.509087 | -1.165420 | -1.519258 |
| C | -1.894074 | 1.304665  | 0.808639  |
| H | -1.838003 | 2.149750  | 0.119131  |
| H | -2.904850 | 1.273625  | 1.221297  |
| H | -1.200131 | 1.490535  | 1.629651  |
| H | 2.399079  | 1.965197  | -1.660109 |
| H | 0.481297  | 3.267635  | 0.466586  |

ax2

```
=====
```

|   |           |           |           |
|---|-----------|-----------|-----------|
| C | 0.867935  | 0.910579  | -0.034384 |
| C | -0.218285 | 0.049005  | -0.703724 |
| H | -0.499113 | 0.577911  | -1.619370 |
| C | 1.517244  | 1.992709  | -0.863397 |
| C | 0.718467  | 2.404989  | 0.061574  |
| C | 0.427788  | -1.268533 | -1.179020 |
| C | 1.217062  | -2.014232 | -0.105229 |
| H | 1.645984  | -2.923380 | -0.531407 |
| H | 0.557128  | -2.327801 | 0.707560  |
| C | 1.740863  | 0.186476  | 0.992285  |
| C | 2.323215  | -1.116526 | 0.442914  |
| H | 2.890852  | -1.629783 | 1.221313  |
| H | 3.023364  | -0.887136 | -0.366988 |
| C | -1.563016 | -0.075552 | 0.091363  |
| H | -0.316436 | -1.920023 | -1.634221 |
| H | 2.544731  | 0.858679  | 1.296883  |
| H | 1.164038  | -0.043216 | 1.889834  |
| H | 1.130415  | -1.005926 | -1.977161 |
| C | -1.400488 | -0.257689 | 1.604729  |
| H | -0.839892 | -1.156303 | 1.859163  |
| H | -0.901280 | 0.599830  | 2.057759  |
| H | -2.388836 | -0.343299 | 2.062482  |
| C | -2.405339 | -1.237947 | -0.444224 |
| H | -3.401851 | -1.206441 | 0.001262  |
| H | -2.520823 | -1.179299 | -1.528892 |
| H | -1.962999 | -2.205364 | -0.201123 |
| C | -2.366140 | 1.215868  | -0.128947 |
| H | -2.590003 | 1.360221  | -1.187871 |

|   |           |          |           |
|---|-----------|----------|-----------|
| H | -3.313111 | 1.169599 | 0.413297  |
| H | -1.824369 | 2.092958 | 0.224833  |
| H | 2.193558  | 2.209260 | -1.672718 |
| H | 0.252809  | 3.224625 | 0.581729  |

eq

```
=====
C  -0.739489    0.917757   -0.178278
C   0.125786   -0.347686   -0.333483
H   0.038925   -0.636394   -1.389795
C  -0.588668    1.856262    0.989473
C  -0.220737    2.327103   -0.154645
C  -0.560584   -1.458488    0.486269
C  -1.986763   -1.727220    0.003250
H  -2.442763   -2.514559    0.606659
H  -1.948858   -2.096900   -1.026462
C  -2.149580    0.670548   -0.712411
C  -2.837574   -0.461592    0.049292
H  -3.831514   -0.651810   -0.360256
H  -2.972966   -0.155913    1.091786
C   1.657348   -0.253856   -0.073669
H   0.010240   -2.385202    0.441587
H  -2.730050    1.591130   -0.635934
H  -2.094088    0.405665   -1.774219
H  -0.593103   -1.153802    1.537055
C   2.010168   -0.052162    1.404464
H   1.602298    0.876303    1.802670
H   1.646021   -0.877548    2.017947
H   3.096168   -0.011988    1.518366
C   2.290487    0.872408   -0.904289
H   3.374553    0.743514   -0.931654
H   1.925419    0.854356   -1.934103
H   2.095592    1.858583   -0.489279
C   2.314698   -1.563033   -0.541974
H   2.081987   -1.763250   -1.590504
H   3.399375   -1.484027   -0.449020
H   2.000150   -2.423214    0.047289
H  -0.717318    1.999401    2.048816
H   0.169385    3.145413   -0.734947
```

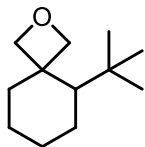

5-(*tert*-butyl)-2-oxaspiro[3.5]nonane

| Conformation | Electronic Energy | Enthalpy    | Gibbs Free Energy |
|--------------|-------------------|-------------|-------------------|
| ax           | -545.644851       | -545.306231 | -545.357863       |
| ax2          | -545.637958       | -545.299191 | -545.350653       |
| eq1          | -545.631981       | -545.293148 | -545.344836       |
| eq2          | -545.635030       | -545.296228 | -545.347911       |
| eq3          | -545.642777       | -545.30407  | -545.355808       |

ax

```

=====
C  -0.377718   -0.048536   -0.701622
H  -0.369065   -0.664892   -1.606560
C  -0.329822    1.412218   -1.193225
C  -0.088723    2.427362   -0.077570
H  -0.077203    3.436616   -0.493601
H  -0.906606    2.394215    0.645591
C   1.312185    0.689920    1.108947
C   1.240362    2.136468    0.617360
H   1.399768    2.819047    1.453635
H   2.050015    2.317401   -0.095848
H   0.503998    1.487935   -1.900709
H   0.649664    0.562273    1.962587
H   2.322882    0.467335    1.461560
H  -1.226366    1.660526   -1.757538
C  -1.692939   -0.481182    0.043073
C   0.962759   -0.317990    0.004537
C   1.359509   -1.752431    0.402896
C   2.177044   -0.460528   -0.942178
H   0.792458   -2.529281   -0.110773
H   1.429007   -1.977636    1.468567
H   1.901533   -0.734025   -1.965093
H   2.908398    0.347943   -0.956760
C  -1.939609   -1.980746   -0.192966
H  -1.932411   -2.221600   -1.257720
H  -1.195307   -2.600964    0.304407
H  -2.914911   -2.262117    0.209577
C  -1.694239   -0.271481    1.562561
H  -2.654177   -0.606693    1.962363
H  -0.915262   -0.861133    2.047973
H  -1.565132    0.771731    1.846711
C  -2.898370    0.266231   -0.541364
H  -2.953570    0.146028   -1.625563
H  -3.818821   -0.134198   -0.112617
H  -2.863643    1.333193   -0.317916
O   2.656514   -1.608441   -0.213121

```

ax2

```

=====
C   0.375894   -0.075050    0.678778

```

|   |           |           |           |
|---|-----------|-----------|-----------|
| H | 0.352071  | -0.719242 | 1.564044  |
| C | 0.344307  | 1.381128  | 1.191570  |
| C | -0.012324 | 2.437888  | 0.135306  |
| H | -0.158166 | 3.396148  | 0.637499  |
| H | 0.811776  | 2.579080  | -0.559468 |
| C | -1.235597 | 0.642358  | -1.172644 |
| C | -1.271877 | 2.081148  | -0.654136 |
| H | -2.146082 | 2.202748  | -0.010142 |
| H | -1.400838 | 2.776207  | -1.484860 |
| H | 1.296243  | 1.636100  | 1.660229  |
| H | -0.468731 | 0.530060  | -1.942407 |
| H | -2.192743 | 0.390250  | -1.636169 |
| H | -0.409987 | 1.432104  | 1.983513  |
| C | 1.706789  | -0.473186 | -0.047053 |
| C | -0.960775 | -0.335235 | -0.031433 |
| C | -1.386374 | -1.778046 | -0.367293 |
| C | -2.181258 | -0.403743 | 0.916771  |
| H | -0.830472 | -2.543004 | 0.173613  |
| H | -1.473382 | -2.044245 | -1.420571 |
| H | -1.912787 | -0.627643 | 1.952184  |
| H | -2.904829 | 0.408652  | 0.884868  |
| C | 1.542466  | -1.750367 | -0.876491 |
| H | 1.219423  | -2.591003 | -0.262932 |
| H | 0.828485  | -1.615574 | -1.691223 |
| H | 2.502825  | -2.018280 | -1.321028 |
| C | 2.305038  | 0.600986  | -0.965358 |
| H | 3.217426  | 0.204304  | -1.415269 |
| H | 1.634851  | 0.885458  | -1.775252 |
| H | 2.578747  | 1.497582  | -0.409765 |
| C | 2.749420  | -0.758653 | 1.044083  |
| H | 2.438644  | -1.598100 | 1.668419  |
| H | 3.711194  | -1.008928 | 0.592446  |
| H | 2.899454  | 0.108385  | 1.689467  |
| O | -2.680922 | -1.587053 | 0.251275  |

eq1

```
=====
```

|   |           |           |           |
|---|-----------|-----------|-----------|
| C | -0.446069 | 0.249348  | -0.573525 |
| H | -0.492530 | -0.040764 | -1.628942 |
| C | -0.210840 | 1.779607  | -0.528043 |
| C | 1.269274  | 2.141199  | -0.584261 |
| H | 1.722786  | 1.680768  | -1.466062 |
| H | 1.392505  | 3.218106  | -0.700544 |
| C | 1.395080  | 0.325821  | 1.188467  |
| C | 1.974440  | 1.667283  | 0.694510  |
| H | 3.046244  | 1.577009  | 0.516728  |
| H | 1.848870  | 2.420100  | 1.473927  |
| H | -0.750661 | 2.254788  | -1.345716 |
| H | 0.630480  | 0.502870  | 1.943008  |
| H | 2.175914  | -0.271184 | 1.662381  |
| H | -0.623308 | 2.189629  | 0.398308  |
| C | -1.845140 | -0.122910 | 0.017121  |
| C | 0.788035  | -0.463595 | 0.023078  |
| C | 0.785637  | -1.981403 | 0.291157  |

|   |           |           |           |
|---|-----------|-----------|-----------|
| C | 1.928155  | -0.849325 | -0.948341 |
| H | 0.083087  | -2.538319 | -0.323418 |
| H | 0.740061  | -2.315705 | 1.327900  |
| H | 1.586169  | -0.999740 | -1.975574 |
| H | 2.840342  | -0.254821 | -0.934847 |
| C | -2.269488 | -1.552564 | -0.354350 |
| H | -2.059698 | -1.773865 | -1.402691 |
| H | -1.782063 | -2.303707 | 0.263371  |
| H | -3.343806 | -1.663301 | -0.196262 |
| C | -1.903506 | -0.001798 | 1.542772  |
| H | -2.917280 | -0.221977 | 1.884467  |
| H | -1.231048 | -0.714562 | 2.022875  |
| H | -1.647728 | 1.000607  | 1.888245  |
| C | -2.896311 | 0.818994  | -0.590968 |
| H | -2.864103 | 0.785362  | -1.682736 |
| H | -3.892816 | 0.508670  | -0.273780 |
| H | -2.755820 | 1.852306  | -0.277600 |
| O | 2.109850  | -2.119526 | -0.279840 |

eq2

```
=====
```

|   |           |           |           |
|---|-----------|-----------|-----------|
| C | -0.154520 | -0.537827 | -0.359915 |
| H | -0.089785 | -0.847739 | -1.410625 |
| C | 0.487808  | -1.658139 | 0.485563  |
| C | 1.891406  | -2.028253 | 0.014251  |
| H | 2.291730  | -2.831687 | 0.634615  |
| H | 1.839895  | -2.407548 | -1.010873 |
| C | 2.183277  | 0.330803  | -0.737513 |
| C | 2.803455  | -0.811035 | 0.056591  |
| H | 3.794388  | -1.047765 | -0.333024 |
| H | 2.933558  | -0.494679 | 1.096831  |
| H | 0.547132  | -1.327700 | 1.527357  |
| H | 2.120711  | 0.050386  | -1.793979 |
| H | 2.815237  | 1.218726  | -0.677989 |
| H | -0.135598 | -2.548355 | 0.476174  |
| C | -1.696074 | -0.431156 | -0.080836 |
| C | 0.780545  | 0.696856  | -0.248469 |
| C | 0.311545  | 2.058193  | -0.793064 |
| C | 0.745995  | 1.436452  | 1.104192  |
| H | -0.513367 | 2.111751  | -1.493208 |
| H | 1.150230  | 2.643143  | -1.177464 |
| H | 0.249048  | 0.962322  | 1.946506  |
| H | 1.728076  | 1.802225  | 1.413997  |
| C | -2.392865 | 0.632539  | -0.941350 |
| H | -2.200879 | 1.641813  | -0.585229 |
| H | -2.091830 | 0.562599  | -1.988639 |
| H | -3.471983 | 0.476892  | -0.894167 |
| C | -2.335735 | -1.777254 | -0.475447 |
| H | -3.421804 | -1.678177 | -0.467446 |
| H | -2.032418 | -2.076175 | -1.481295 |
| H | -2.081701 | -2.581963 | 0.211728  |
| C | -2.058779 | -0.158650 | 1.384535  |
| H | -1.810650 | 0.858562  | 1.684393  |
| H | -3.136977 | -0.279219 | 1.511268  |



|   |           |           |          |
|---|-----------|-----------|----------|
| H | -1.568296 | -0.854789 | 2.065526 |
| O | -0.038883 | 2.516525  | 0.536788 |

eq3

```

=====
C  -0.253639   -0.507957   -0.394879
H  -0.226940   -0.729933   -1.469502
C   0.217061   -1.778479    0.343387
C   1.591359   -2.271986   -0.090487
H   1.846930   -3.183475    0.452813
H   1.577401   -2.523192   -1.155687
C   2.207217    0.084429   -0.568624
C   2.623014   -1.182638    0.161741
H   3.616866   -1.492905   -0.165028
H   2.684598   -0.986731    1.237158
H   0.260005   -1.561950    1.415668
H   2.220007   -0.105769   -1.647615
H   2.924499    0.887787   -0.383122
H  -0.518923   -2.571999    0.215311
C  -1.769800   -0.241398   -0.056454
C   0.806750    0.603151   -0.203147
C   0.643173    1.988040   -0.872851
C   0.810853    1.415213    1.109842
H  -0.285300    2.203443   -1.389745
H   1.479230    2.259684   -1.520727
H  -0.050881    1.281274    1.760713
H   1.726322    1.347049    1.701495
C  -2.604984   -1.178986   -0.943814
H  -2.474302   -0.931225   -1.998933
H  -2.330166   -2.225189   -0.804463
H  -3.665449   -1.079543   -0.703051
C  -2.135294   -0.555070    1.405370
H  -3.184995   -0.303687    1.568057
H  -2.015104   -1.612080    1.638970
H  -1.547310    0.016693    2.122159
C  -2.248967    1.184030   -0.352814
H  -2.134814    1.434630   -1.407492
H  -3.313113    1.251915   -0.117618
H  -1.730322    1.934388    0.245290
O   0.727662    2.667589    0.397717

```

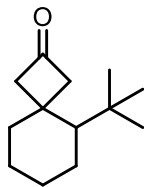

5-(*tert*-butyl)spiro[3.5]nonan-2-one

Conformation | Electronic Energy | Enthalpy | Gibbs Free Energy

|     |             |             |             |
|-----|-------------|-------------|-------------|
| ax  | -583.766233 | -583.423009 | -583.476576 |
| ax3 | -583.765523 | -583.422175 | -583.475727 |
| ax4 | -583.764070 | -583.420801 | -583.474566 |
| eq  | -583.765055 | -583.421855 | -583.475815 |
| eq2 | -583.764476 | -583.421315 | -583.475042 |
| eq3 | -583.764956 | -583.42184  | -583.475524 |

ax

|   |           |           |           |
|---|-----------|-----------|-----------|
| C | -0.597915 | -0.080581 | -0.707657 |
| H | -0.429095 | -0.660811 | -1.620751 |
| C | -0.952109 | 1.344948  | -1.177431 |
| C | -0.986090 | 2.370899  | -0.046108 |
| H | -1.255109 | 3.350946  | -0.444691 |
| H | -1.755981 | 2.104688  | 0.681491  |
| C | 0.845779  | 1.065796  | 1.103444  |
| C | 0.378061  | 2.444652  | 0.636988  |
| H | 0.351132  | 3.129621  | 1.485976  |
| H | 1.101095  | 2.853246  | -0.074861 |
| H | -0.179333 | 1.655389  | -1.888548 |
| H | 0.250700  | 0.749152  | 1.957942  |
| H | 1.879558  | 1.130585  | 1.458261  |
| H | -1.888566 | 1.347783  | -1.731008 |
| C | -1.748606 | -0.857889 | 0.033965  |
| C | 0.775805  | 0.008202  | -0.009833 |
| C | 1.484591  | -1.306364 | 0.445309  |
| C | 1.966571  | 0.258945  | -1.002091 |
| H | 1.160234  | -2.168048 | -0.138892 |
| H | 1.513208  | -1.555678 | 1.504987  |
| H | 1.756685  | -0.134677 | -1.999147 |
| H | 2.391743  | 1.258093  | -1.076637 |
| C | -1.613858 | -2.364284 | -0.248775 |
| H | -1.565361 | -2.562269 | -1.321298 |
| H | -0.731329 | -2.795471 | 0.220238  |
| H | -2.481775 | -2.892599 | 0.151244  |
| C | -1.782530 | -0.694369 | 1.558764  |
| H | -2.614392 | -1.280696 | 1.956110  |
| H | -0.869170 | -1.067486 | 2.023123  |
| H | -1.930803 | 0.338850  | 1.869154  |
| C | -3.116266 | -0.430727 | -0.516374 |
| H | -3.159684 | -0.537450 | -1.602453 |
| H | -3.894192 | -1.064503 | -0.086813 |
| H | -3.353552 | 0.603610  | -0.265135 |
| C | 2.743526  | -0.760781 | -0.195053 |
| O | 3.915281  | -0.974120 | -0.038648 |

ax3

|   |          |           |          |
|---|----------|-----------|----------|
| C | 0.589030 | -0.108595 | 0.671708 |
| H | 0.405931 | -0.720945 | 1.561346 |
| C | 0.921400 | 1.314561  | 1.175705 |
| C | 0.833720 | 2.422416  | 0.114251 |

|   |           |           |           |
|---|-----------|-----------|-----------|
| H | 1.666165  | 2.351752  | -0.581606 |
| H | 0.932444  | 3.389239  | 0.612253  |
| C | -0.806517 | 0.982267  | -1.175587 |
| C | -0.475117 | 2.388734  | -0.675285 |
| H | -1.290532 | 2.740116  | -0.039066 |
| H | -0.420009 | 3.081371  | -1.516722 |
| H | 0.212281  | 1.555928  | 1.972963  |
| H | -0.098473 | 0.672175  | -1.948195 |
| H | -1.797050 | 0.981303  | -1.641098 |
| H | 1.910934  | 1.329809  | 1.635249  |
| C | 1.796160  | -0.821889 | -0.034984 |
| C | -0.780591 | -0.033983 | -0.032644 |
| C | -1.514898 | -1.355792 | -0.430726 |
| C | -1.961204 | 0.264610  | 0.962568  |
| H | -1.179668 | -2.206869 | 0.163212  |
| H | -1.572459 | -1.632442 | -1.481766 |
| H | -1.736371 | -0.093360 | 1.970103  |
| H | -2.385264 | 1.264867  | 1.012119  |
| C | 1.362845  | -2.046487 | -0.847007 |
| H | 0.824599  | -2.771005 | -0.236010 |
| H | 0.734280  | -1.770600 | -1.694409 |
| H | 2.250686  | -2.545065 | -1.241463 |
| C | 2.634892  | 0.067448  | -0.963674 |
| H | 3.426859  | -0.540124 | -1.406788 |
| H | 2.051615  | 0.493368  | -1.779207 |
| H | 3.115296  | 0.879945  | -0.419203 |
| C | 2.735104  | -1.320626 | 1.075510  |
| H | 2.234699  | -2.058102 | 1.705985  |
| H | 3.618268  | -1.792150 | 0.639832  |
| H | 3.075534  | -0.503751 | 1.713687  |
| C | -2.755639 | -0.779954 | 0.211903  |
| O | -3.931860 | -0.992714 | 0.086045  |

ax4

```
=====
```

|   |           |           |           |
|---|-----------|-----------|-----------|
| C | -0.367119 | 1.571297  | 1.167062  |
| H | -1.266042 | 1.957677  | 1.654070  |
| C | 0.333566  | 2.688240  | 0.399392  |
| C | 1.507844  | 2.132068  | -0.399992 |
| H | 1.985088  | 2.926798  | -0.976370 |
| H | 2.262844  | 1.736389  | 0.284698  |
| C | 0.365382  | -0.161619 | -0.616192 |
| C | 1.016925  | 1.034407  | -1.341477 |
| H | 1.819142  | 0.692984  | -1.991442 |
| H | 0.264975  | 1.477035  | -2.001297 |
| H | -0.375707 | 3.154713  | -0.292167 |
| H | -0.122844 | -0.749015 | -1.402066 |
| H | 0.663089  | 3.465340  | 1.090947  |
| C | -0.783366 | 0.406739  | 0.264878  |
| C | -1.686162 | -0.646527 | 0.990550  |
| C | -2.008239 | 0.758364  | -0.656770 |
| H | -2.136097 | -0.198428 | 1.880544  |
| H | -1.318619 | -1.635326 | 1.238890  |
| H | -2.559626 | 1.628622  | -0.294279 |

|   |           |           |           |
|---|-----------|-----------|-----------|
| H | -1.852939 | 0.838306  | -1.731007 |
| C | 1.374978  | -1.173050 | 0.051118  |
| H | 0.288262  | 1.212582  | 1.960687  |
| C | 1.602752  | -0.958075 | 1.553045  |
| H | 2.268173  | -1.739643 | 1.926347  |
| H | 2.077804  | 0.001468  | 1.756960  |
| H | 0.678378  | -1.010628 | 2.127747  |
| C | 0.857614  | -2.606051 | -0.167516 |
| H | -0.134130 | -2.771843 | 0.247383  |
| H | 0.809371  | -2.831361 | -1.234856 |
| H | 1.536121  | -3.324958 | 0.296380  |
| C | 2.752020  | -1.121942 | -0.627800 |
| H | 3.387997  | -1.901308 | -0.203274 |
| H | 2.676984  | -1.304275 | -1.701174 |
| H | 3.252573  | -0.165380 | -0.476172 |
| C | -2.651149 | -0.521429 | -0.166023 |
| O | -3.511883 | -1.234286 | -0.607775 |

eq

```
=====
```

|   |           |           |           |
|---|-----------|-----------|-----------|
| C | -0.247044 | -0.734223 | -0.345196 |
| H | -0.486224 | -1.054145 | -1.367539 |
| C | -1.269671 | -1.411453 | 0.591610  |
| C | -2.717704 | -1.161662 | 0.177513  |
| H | -2.888539 | -1.590862 | -0.814770 |
| H | -3.393316 | -1.670698 | 0.867288  |
| C | -2.000657 | 1.034034  | -0.754741 |
| C | -3.011851 | 0.330829  | 0.139043  |
| H | -2.943721 | 0.739228  | 1.152683  |
| H | -4.026016 | 0.522488  | -0.215445 |
| H | -1.096802 | -2.483827 | 0.629942  |
| H | -2.120786 | 0.686861  | -1.786598 |
| H | -2.182143 | 2.111181  | -0.756569 |
| H | -1.127739 | -1.033730 | 1.608667  |
| C | 1.202259  | -1.288928 | -0.096558 |
| C | -0.547838 | 0.792352  | -0.329380 |
| C | -0.161176 | 1.531563  | 0.996750  |
| C | 0.420658  | 1.744825  | -1.105031 |
| H | 0.061480  | 0.961022  | 1.894309  |
| H | -0.883997 | 2.316048  | 1.233866  |
| H | 1.076829  | 1.375317  | -1.884305 |
| H | -0.143981 | 2.598831  | -1.487940 |
| C | 1.726426  | -1.077851 | 1.330569  |
| H | 1.967074  | -0.035320 | 1.534762  |
| H | 1.017545  | -1.424354 | 2.083390  |
| H | 2.648156  | -1.650049 | 1.458951  |
| C | 1.175492  | -2.808585 | -0.359083 |
| H | 2.197213  | -3.188840 | -0.393206 |
| H | 0.654804  | -3.361165 | 0.420790  |
| H | 0.700188  | -3.035403 | -1.316274 |
| C | 2.242226  | -0.715512 | -1.071774 |
| H | 2.526936  | 0.306522  | -0.833184 |
| H | 3.151675  | -1.316273 | -1.015266 |
| H | 1.885658  | -0.748603 | -2.103513 |

|   |          |          |          |
|---|----------|----------|----------|
| C | 1.010579 | 2.124585 | 0.237191 |
| O | 2.059440 | 2.601991 | 0.578060 |

eq2

|   |           |           |           |
|---|-----------|-----------|-----------|
| C | -0.766647 | 0.344659  | -0.378438 |
| H | -0.941655 | 0.576856  | -1.436870 |
| C | -1.142482 | 1.602411  | 0.433190  |
| C | -0.407155 | 2.862820  | -0.004676 |
| H | -0.739496 | 3.713396  | 0.593088  |
| H | -0.646327 | 3.088096  | -1.048686 |
| C | 1.507020  | 1.424970  | -0.657159 |
| C | 1.092593  | 2.651780  | 0.139443  |
| H | 1.337669  | 2.509973  | 1.196585  |
| H | 1.651219  | 3.523815  | -0.204515 |
| H | -2.218225 | 1.767155  | 0.381133  |
| H | 1.323322  | 1.612980  | -1.720217 |
| H | 2.582382  | 1.250559  | -0.553955 |
| H | -0.905313 | 1.419937  | 1.485986  |
| C | -1.774295 | -0.814441 | -0.032333 |
| C | 0.763113  | 0.129038  | -0.276579 |
| C | 1.363461  | -0.449592 | 1.045720  |
| C | 1.488915  | -1.002054 | -1.085452 |
| H | 0.680736  | -1.108878 | 1.581085  |
| H | 1.836785  | 0.237109  | 1.746544  |
| H | 0.891965  | -1.858655 | -1.375624 |
| H | 2.078575  | -0.671512 | -1.940423 |
| C | -2.145953 | -0.874335 | 1.459509  |
| H | -1.278184 | -0.982420 | 2.109256  |
| H | -2.694195 | 0.011383  | 1.778207  |
| H | -2.793336 | -1.736760 | 1.629585  |
| C | -3.068502 | -0.542224 | -0.817604 |
| H | -3.828820 | -1.280392 | -0.554517 |
| H | -3.478642 | 0.445344  | -0.605490 |
| H | -2.889444 | -0.611609 | -1.892356 |
| C | -1.307863 | -2.213855 | -0.446881 |
| H | -0.443009 | -2.553950 | 0.123813  |
| H | -2.117798 | -2.922059 | -0.260408 |
| H | -1.072919 | -2.262567 | -1.510728 |
| C | 2.281072  | -1.288454 | 0.176947  |
| O | 3.295632  | -1.894018 | 0.393049  |

eq3

|   |           |          |           |
|---|-----------|----------|-----------|
| C | 0.780121  | 0.437544 | 0.262631  |
| H | 1.001013  | 0.815864 | 1.269168  |
| C | 0.889852  | 1.659130 | -0.670141 |
| C | 0.097459  | 2.844903 | -0.113041 |
| H | 0.181177  | 3.701138 | -0.784778 |
| H | 0.551542  | 3.141199 | 0.837709  |
| C | -1.514561 | 1.203043 | 0.911278  |
| C | -1.369635 | 2.498784 | 0.117241  |
| H | -1.868090 | 2.390310 | -0.849255 |
| H | -1.876728 | 3.312266 | 0.638877  |

|   |           |           |           |
|---|-----------|-----------|-----------|
| H | 1.925585  | 1.968802  | -0.782357 |
| H | -1.164488 | 1.351743  | 1.937146  |
| H | -2.570965 | 0.924240  | 0.974999  |
| H | 0.524409  | 1.398040  | -1.669227 |
| C | 1.862604  | -0.667890 | 0.032015  |
| C | -0.717340 | 0.041748  | 0.291196  |
| C | -1.431091 | -0.367031 | -1.047040 |
| C | -1.219117 | -1.291509 | 0.933678  |
| H | -0.781315 | -0.851212 | -1.773041 |
| H | -2.042753 | 0.378936  | -1.550909 |
| H | -0.513537 | -2.115800 | 0.860046  |
| H | -1.638447 | -1.252445 | 1.938302  |
| C | 1.546223  | -1.637288 | -1.111768 |
| H | 0.679796  | -2.266311 | -0.909569 |
| H | 1.373757  | -1.102698 | -2.047780 |
| H | 2.399740  | -2.301073 | -1.266370 |
| C | 3.218880  | -0.020419 | -0.292700 |
| H | 4.001694  | -0.778894 | -0.233279 |
| H | 3.244102  | 0.401093  | -1.297494 |
| H | 3.463704  | 0.770810  | 0.419237  |
| C | 2.083574  | -1.450565 | 1.337683  |
| H | 1.175696  | -1.885331 | 1.747482  |
| H | 2.795658  | -2.261580 | 1.171548  |
| H | 2.502855  | -0.790862 | 2.100595  |
| C | -2.182238 | -1.399820 | -0.230879 |
| O | -3.204099 | -2.006501 | -0.406496 |

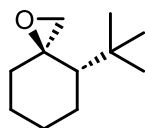

(3R,4S)-4-(*tert*-butyl)-1-oxaspiro[2.5]octane

| Conformation | Electronic Energy | Enthalpy    | Gibbs Free Energy |
|--------------|-------------------|-------------|-------------------|
| ax1          | -506.349117       | -506.0415   | -506.091188       |
| ax2          | -506.347485       | -506.039542 | -506.089507       |
| eq2          | -506.346617       | -506.038943 | -506.088564       |

ax1

|   |           |           |           |
|---|-----------|-----------|-----------|
| C | 0.876239  | 0.827040  | 0.023939  |
| C | -0.259515 | 0.088249  | -0.668462 |
| H | -0.481065 | 0.697305  | -1.549510 |
| C | 0.962657  | 2.286850  | -0.049786 |
| C | 0.291192  | -1.262465 | -1.175847 |
| C | 1.119958  | -2.052734 | -0.152900 |

|   |           |           |           |
|---|-----------|-----------|-----------|
| H | 1.567891  | -2.911890 | -0.655933 |
| H | 0.482660  | -2.451588 | 0.635403  |
| C | 1.629142  | 0.075698  | 1.093536  |
| C | 2.215735  | -1.198664 | 0.483571  |
| H | 2.749655  | -1.771178 | 1.243049  |
| H | 2.945985  | -0.912667 | -0.278348 |
| C | -1.613567 | 0.003709  | 0.108182  |
| H | 1.505918  | 2.824963  | 0.719419  |
| H | 0.185448  | 2.844698  | -0.558133 |
| H | -0.523822 | -1.882484 | -1.552695 |
| H | 2.417615  | 0.716109  | 1.490811  |
| H | 0.956277  | -0.171929 | 1.917122  |
| H | 0.938098  | -1.048209 | -2.030888 |
| C | -1.717742 | -1.163161 | 1.097157  |
| H | -1.646092 | -2.125677 | 0.590084  |
| H | -0.955466 | -1.124919 | 1.874342  |
| H | -2.692045 | -1.123308 | 1.588831  |
| C | -2.728235 | -0.176656 | -0.932120 |
| H | -3.696630 | -0.270937 | -0.436938 |
| H | -2.773763 | 0.680769  | -1.606242 |
| H | -2.573581 | -1.073728 | -1.533909 |
| C | -1.885455 | 1.305116  | 0.869580  |
| H | -1.863657 | 2.168526  | 0.203182  |
| H | -2.875492 | 1.261132  | 1.327798  |
| H | -1.155058 | 1.468877  | 1.664173  |
| O | 1.768083  | 1.476032  | -0.904090 |

ax2

```
=====
```

|   |           |           |           |
|---|-----------|-----------|-----------|
| C | 0.858288  | 0.839313  | 0.016017  |
| C | -0.254776 | 0.065166  | -0.679776 |
| H | -0.496866 | 0.647706  | -1.573214 |
| C | 0.885478  | 2.305969  | -0.022566 |
| C | 0.359681  | -1.256356 | -1.187716 |
| C | 1.120726  | -2.053290 | -0.127534 |
| H | 1.551577  | -2.944656 | -0.587216 |
| H | 0.442887  | -2.400859 | 0.654490  |
| C | 1.668030  | 0.102420  | 1.062115  |
| C | 2.229625  | -1.199329 | 0.486292  |
| H | 2.758699  | -1.750865 | 1.264532  |
| H | 2.960082  | -0.957452 | -0.290935 |
| C | -1.607387 | -0.029359 | 0.101705  |
| H | 1.420027  | 2.847130  | 0.750557  |
| H | 0.082134  | 2.845401  | -0.509104 |
| H | -0.398114 | -1.873408 | -1.666605 |
| H | 2.475489  | 0.756691  | 1.393654  |
| H | 1.049893  | -0.121221 | 1.930170  |
| H | 1.074774  | -0.987057 | -1.971119 |
| C | -1.493371 | -0.405440 | 1.584259  |
| H | -0.975815 | -1.350121 | 1.742267  |
| H | -0.982012 | 0.369924  | 2.155524  |
| H | -2.498678 | -0.505710 | 1.999713  |
| C | -2.520905 | -1.051520 | -0.584017 |

|   |           |           |           |
|---|-----------|-----------|-----------|
| H | -3.526833 | -0.984087 | -0.165950 |
| H | -2.588351 | -0.866301 | -1.658516 |
| H | -2.168223 | -2.072985 | -0.435980 |
| C | -2.306250 | 1.337041  | 0.041012  |
| H | -2.449639 | 1.663402  | -0.991143 |
| H | -3.287853 | 1.272431  | 0.514610  |
| H | -1.736973 | 2.102678  | 0.567631  |
| O | 1.707371  | 1.547708  | -0.907764 |

eq2

```
=====
```

|   |           |           |           |
|---|-----------|-----------|-----------|
| C | -0.748668 | 0.828025  | -0.148257 |
| C | 0.156248  | -0.396372 | -0.275394 |
| H | 0.055818  | -0.721906 | -1.318716 |
| C | -0.744442 | 1.748113  | 0.996586  |
| C | -0.522912 | -1.490610 | 0.570895  |
| C | -1.935174 | -1.782800 | 0.050313  |
| H | -2.413897 | -2.536722 | 0.677437  |
| H | -1.849182 | -2.211694 | -0.952694 |
| C | -2.101768 | 0.593360  | -0.783440 |
| C | -2.807567 | -0.529799 | -0.018414 |
| H | -3.766937 | -0.760689 | -0.483215 |
| H | -3.017402 | -0.179884 | 0.996617  |
| C | 1.689274  | -0.231066 | -0.079412 |
| H | -0.022136 | 1.655811  | 1.793377  |
| H | -1.678214 | 2.229494  | 1.266642  |
| H | 0.056069  | -2.411572 | 0.540407  |
| H | -2.683753 | 1.514932  | -0.747833 |
| H | -1.974289 | 0.313335  | -1.832613 |
| H | -0.569122 | -1.169291 | 1.616190  |
| C | 2.101219  | 0.431433  | 1.239224  |
| H | 1.912363  | 1.503885  | 1.226409  |
| H | 1.585362  | -0.008771 | 2.094818  |
| H | 3.173531  | 0.291068  | 1.392180  |
| C | 2.255091  | 0.588922  | -1.246974 |
| H | 3.332760  | 0.718630  | -1.124875 |
| H | 2.086224  | 0.073526  | -2.195433 |
| H | 1.794612  | 1.573091  | -1.301823 |
| C | 2.348498  | -1.617324 | -0.136441 |
| H | 1.984894  | -2.196083 | -0.988762 |
| H | 3.428454  | -1.501108 | -0.243910 |
| H | 2.168086  | -2.194598 | 0.770608  |
| O | -0.217755 | 2.145907  | -0.274615 |



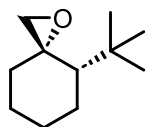

(3S,4S)-4-(*tert*-butyl)-1-oxaspiro[2.5]octane

| Conformation | Electronic Energy | Enthalpy    | Gibbs Free Energy |
|--------------|-------------------|-------------|-------------------|
| ax1          | -506.347988       | -506.040362 | -506.089876       |
| ax2          | -506.346925       | -506.038984 | -506.088514       |
| eq1          | -506.347191       | -506.039359 | -506.088931       |

ax1

|   |           |           |           |
|---|-----------|-----------|-----------|
| C | -0.910996 | 0.799749  | 0.018574  |
| C | 0.250259  | 0.085206  | 0.690715  |
| H | 0.484948  | 0.688719  | 1.572066  |
| C | -1.726693 | 1.707625  | 0.839032  |
| C | -0.291069 | -1.270550 | 1.197559  |
| C | -1.106074 | -2.070780 | 0.170528  |
| H | -1.555290 | -2.928726 | 0.674443  |
| H | -0.456619 | -2.472644 | -0.605611 |
| C | -1.623268 | 0.055862  | -1.082816 |
| C | -2.200641 | -1.232215 | -0.490304 |
| H | -2.705796 | -1.813081 | -1.262912 |
| H | -2.954642 | -0.962459 | 0.255405  |
| C | 1.596566  | 0.009396  | -0.100122 |
| H | -1.451307 | 1.890085  | 1.871426  |
| H | -2.772906 | 1.849605  | 0.592418  |
| H | 0.529330  | -1.882052 | 1.576824  |
| H | -2.413704 | 0.688923  | -1.487845 |
| H | -0.933452 | -0.174570 | -1.897290 |
| H | -0.943024 | -1.061912 | 2.050841  |
| C | 1.719457  | -1.176264 | -1.064771 |
| H | 1.671576  | -2.129912 | -0.538184 |
| H | 0.952797  | -1.170284 | -1.838288 |
| H | 2.690156  | -1.125288 | -1.562723 |
| C | 2.722942  | -0.126131 | 0.934507  |
| H | 3.688534  | -0.220298 | 0.433823  |
| H | 2.762099  | 0.750204  | 1.584329  |
| H | 2.585508  | -1.008537 | 1.562250  |
| C | 1.832325  | 1.299214  | -0.891882 |
| H | 1.769626  | 2.177182  | -0.249005 |
| H | 2.825556  | 1.273229  | -1.345274 |
| H | 1.098584  | 1.418532  | -1.690780 |
| O | -0.806104 | 2.215827  | -0.127755 |

ax2

|   |           |           |           |
|---|-----------|-----------|-----------|
| C | 0.877226  | 0.829339  | -0.057541 |
| C | -0.241662 | 0.029418  | -0.717109 |
| H | -0.514976 | 0.572645  | -1.625563 |
| C | 1.524685  | 1.892447  | -0.840940 |
| C | 0.382958  | -1.298294 | -1.194062 |
| C | 1.145396  | -2.058331 | -0.110427 |
| H | 1.552871  | -2.980099 | -0.529234 |
| H | 0.469927  | -2.348546 | 0.698070  |
| C | 1.727356  | 0.130039  | 0.984146  |
| C | 2.274869  | -1.191384 | 0.442890  |
| H | 2.819991  | -1.714926 | 1.229176  |
| H | 2.987173  | -0.984759 | -0.361764 |
| C | -1.576969 | -0.061208 | 0.098978  |
| H | 1.164436  | 2.117191  | -1.838002 |
| H | 2.558877  | 2.146132  | -0.638529 |
| H | -0.375334 | -1.929892 | -1.652306 |
| H | 2.539354  | 0.799570  | 1.271015  |
| H | 1.138747  | -0.065357 | 1.879110  |
| H | 1.095284  | -1.049556 | -1.987633 |
| C | -1.400659 | -0.187236 | 1.616443  |
| H | -0.846660 | -1.081069 | 1.900945  |
| H | -0.892267 | 0.683702  | 2.032091  |
| H | -2.386349 | -0.247195 | 2.083139  |
| C | -2.423018 | -1.242330 | -0.386450 |
| H | -3.410267 | -1.198732 | 0.077744  |
| H | -2.560489 | -1.215795 | -1.469589 |
| H | -1.972470 | -2.200704 | -0.123078 |
| C | -2.376643 | 1.224637  | -0.162849 |
| H | -2.625796 | 1.316270  | -1.222239 |
| H | -3.310431 | 1.210594  | 0.403307  |
| H | -1.807243 | 2.105740  | 0.130066  |
| O | 0.611799  | 2.207774  | 0.213099  |

eq1

```
=====
```

|   |           |           |           |
|---|-----------|-----------|-----------|
| C | -0.737091 | 0.848584  | -0.221962 |
| C | 0.170103  | -0.377730 | -0.337289 |
| H | 0.088502  | -0.694851 | -1.384264 |
| C | -0.318710 | 2.247205  | -0.057229 |
| C | -0.501552 | -1.480304 | 0.505469  |
| C | -1.918034 | -1.783116 | 0.010171  |
| H | -2.369028 | -2.559525 | 0.630563  |
| H | -1.855668 | -2.183427 | -1.006745 |
| C | -2.126234 | 0.594961  | -0.774622 |
| C | -2.796506 | -0.535818 | 0.005126  |
| H | -3.777222 | -0.756670 | -0.418496 |
| H | -2.956520 | -0.202664 | 1.034036  |
| C | 1.695133  | -0.211845 | -0.086117 |
| H | -0.992775 | 3.025623  | -0.398853 |
| H | 0.722123  | 2.529860  | -0.008957 |
| H | 0.084905  | -2.395577 | 0.467622  |
| H | -2.712517 | 1.511742  | -0.703955 |
| H | -2.047708 | 0.327739  | -1.831628 |
| H | -0.538408 | -1.160346 | 1.550934  |

|   |           |           |           |
|---|-----------|-----------|-----------|
| C | 2.034265  | 0.405062  | 1.276675  |
| H | 1.747622  | 1.450793  | 1.356259  |
| H | 1.541014  | -0.137422 | 2.084413  |
| H | 3.112356  | 0.340024  | 1.441158  |
| C | 2.318846  | 0.609718  | -1.224293 |
| H | 3.379173  | 0.779229  | -1.026312 |
| H | 2.239850  | 0.063204  | -2.166956 |
| H | 1.846322  | 1.578728  | -1.366085 |
| C | 2.368905  | -1.593393 | -0.139888 |
| H | 2.041846  | -2.160818 | -1.014309 |
| H | 3.450873  | -1.465593 | -0.206960 |
| H | 2.163480  | -2.186406 | 0.750862  |
| O | -0.787873 | 1.494551  | 1.060178  |

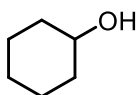

cyclohexanol

| Conformation | Electronic Energy | Enthalpy    | Gibbs Free Energy |
|--------------|-------------------|-------------|-------------------|
| ax           | -311.062057       | -310.878736 | -310.916784       |
| ax2          | -311.062032       | -310.878622 | -310.916642       |
| eq           | -311.063428       | -310.880109 | -310.91815        |
| eq2          | -311.063410       | -310.880074 | -310.918178       |

ax

|   |           |           |           |
|---|-----------|-----------|-----------|
| C | -0.350132 | 1.238662  | 0.613910  |
| C | -1.153151 | -0.046464 | 0.425892  |
| H | -1.957943 | -0.079163 | 1.166826  |
| C | -0.273839 | -1.278882 | 0.590069  |
| C | 0.955288  | -1.230933 | -0.317930 |
| H | 1.579670  | -2.107880 | -0.139255 |
| H | 0.634260  | -1.271995 | -1.361434 |
| C | 0.878212  | 1.284733  | -0.294864 |
| C | 1.756395  | 0.050589  | -0.088050 |
| H | 2.618856  | 0.083180  | -0.755982 |
| H | 2.143795  | 0.053293  | 0.936204  |
| H | 0.045842  | -1.328375 | 1.634569  |
| H | 0.555125  | 1.323717  | -1.338210 |
| H | 1.447463  | 2.195424  | -0.102007 |
| H | -0.870313 | -2.170607 | 0.389944  |
| H | -0.999290 | 2.099614  | 0.433224  |
| H | -0.034987 | 1.292124  | 1.660080  |
| O | -1.725409 | -0.110988 | -0.883933 |
| H | -2.235853 | 0.692342  | -1.026656 |

ax2

```

=====
C  -0.322327      1.259319      0.605078
C  -1.166753     -0.000120      0.417541
H  -1.979042     -0.000099      1.144695
C  -0.322194     -1.259379      0.604991
C   0.915102     -1.259143     -0.295552
H   1.509857     -2.153327     -0.104573
H   0.613154     -1.311499     -1.347139
C   0.914921      1.259233     -0.295522
C   1.753565      0.000111     -0.074699
H   2.620107      0.000168     -0.737721
H   2.133703      0.000105      0.951807
H  -0.003541     -1.303742      1.650189
H   0.612919      1.311537     -1.347097
H   1.509561      2.153513     -0.104606
H  -0.942283     -2.136660      0.414254
H  -0.942648      2.136421      0.414328
H  -0.003674      1.303605      1.650263
O  -1.825691     -0.000017     -0.851485
H  -1.156463     -0.000010     -1.543538

```

eq

```

=====
C  -0.308325     -1.264869     -0.181889
C  -1.023430     -0.021469      0.316905
H  -0.994474     -0.017755      1.414149
C  -0.343997      1.242399     -0.193329
C   1.129708      1.274149      0.214195
H   1.605810      2.174012     -0.177436
H   1.201311      1.324803      1.305035
C   1.167023     -1.244999      0.220046
C   1.858340      0.023990     -0.278733
H   2.899176      0.039962      0.048621
H   1.865568      0.021989     -1.373160
H  -0.428386      1.258415     -1.284322
H   1.243776     -1.289307      1.310783
H   1.669796     -2.131164     -0.169509
H  -0.868667      2.121310      0.190275
H  -0.806300     -2.152708      0.211283
H  -0.395050     -1.294246     -1.272448
O  -2.379633     -0.101502     -0.118371
H  -2.831405      0.701497      0.160526

```

eq2

```

=====
C   0.329540      1.255597     -0.169525
C   1.027424     -0.000124      0.337452
H   1.005012     -0.000206      1.430637
C   0.330016     -1.255726     -0.169639
C  -1.151157     -1.258925      0.211708
H  -1.635943     -2.152978     -0.182731
H  -1.239746     -1.303190      1.301583
C  -1.151526      1.258974      0.211467
C  -1.853466     -0.000140     -0.296214

```

|   |           |           |           |
|---|-----------|-----------|-----------|
| H | -2.899546 | -0.000386 | 0.014204  |
| H | -1.843163 | -0.000166 | -1.390656 |
| H | 0.426707  | -1.284976 | -1.261139 |
| H | -1.240734 | 1.303644  | 1.301238  |
| H | -1.636227 | 2.152803  | -0.183618 |
| H | 0.836941  | -2.136641 | 0.227585  |
| H | 0.836971  | 2.136138  | 0.227849  |
| H | 0.426523  | 1.284737  | -1.261009 |
| O | 2.412538  | 0.000629  | -0.001558 |
| H | 2.477914  | -0.001738 | -0.962973 |

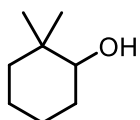

2,2-dimethylcyclohexan-1-ol

| Conformation | Electronic Energy | Enthalpy    | Gibbs Free Energy |
|--------------|-------------------|-------------|-------------------|
| ax           | -389.676572       | -389.434581 | -389.478199       |
| ax2          | -389.676683       | -389.43462  | -389.478202       |
| ax3          | -389.677087       | -389.434954 | -389.478348       |
| eq           | -389.677641       | -389.435687 | -389.479444       |
| eq2          | -389.678184       | -389.436127 | -389.479712       |
| eq3          | -389.678073       | -389.43603  | -389.479604       |

ax

|   |           |           |           |
|---|-----------|-----------|-----------|
| C | 0.898603  | -0.231971 | 0.051513  |
| C | 0.097081  | 1.008175  | 0.486028  |
| H | 0.636398  | 1.487003  | 1.312100  |
| C | -1.320924 | 0.664302  | 0.940305  |
| C | -2.085566 | -0.118681 | -0.126915 |
| H | -3.078491 | -0.377946 | 0.243531  |
| H | -2.227004 | 0.514746  | -1.006157 |
| C | 0.096184  | -1.026582 | -0.993725 |
| C | -1.320082 | -1.376960 | -0.534705 |
| H | -1.848249 | -1.894385 | -1.337480 |
| H | -1.280802 | -2.068597 | 0.310836  |
| H | -1.270415 | 0.084489  | 1.864209  |
| H | 0.031032  | -0.426827 | -1.905604 |
| H | 0.651095  | -1.933895 | -1.246683 |
| H | -1.843989 | 1.592919  | 1.184984  |
| C | 1.195989  | -1.097212 | 1.281117  |
| H | 1.796298  | -1.960557 | 0.987852  |
| H | 1.765486  | -0.529289 | 2.020080  |
| H | 0.295892  | -1.469289 | 1.767700  |
| C | 2.233714  | 0.202759  | -0.555172 |
| H | 2.805167  | 0.805126  | 0.155305  |

|   |           |           |           |
|---|-----------|-----------|-----------|
| H | 2.831689  | -0.674679 | -0.810277 |
| H | 2.085747  | 0.792182  | -1.458517 |
| O | 0.053284  | 1.910934  | -0.622199 |
| H | -0.546124 | 2.628535  | -0.394960 |

ax2

```
=====
```

|   |           |           |           |
|---|-----------|-----------|-----------|
| C | 0.895615  | -0.241395 | 0.050217  |
| C | 0.111488  | 1.013319  | 0.494220  |
| H | 0.659608  | 1.483896  | 1.313512  |
| C | -1.307866 | 0.681221  | 0.956316  |
| C | -2.088656 | -0.085523 | -0.113064 |
| H | -3.082616 | -0.333152 | 0.261634  |
| H | -2.243712 | 0.551250  | -0.990728 |
| C | 0.076711  | -1.017949 | -0.997174 |
| C | -1.343174 | -1.351123 | -0.536075 |
| H | -1.881817 | -1.854903 | -1.340272 |
| H | -1.309079 | -2.048680 | 0.304347  |
| H | -1.260248 | 0.084070  | 1.868891  |
| H | 0.017468  | -0.420691 | -1.914403 |
| H | 0.618120  | -1.929699 | -1.261881 |
| H | -1.814441 | 1.613965  | 1.208905  |
| C | 1.180969  | -1.119937 | 1.273472  |
| H | 1.772278  | -1.988383 | 0.976633  |
| H | 1.755570  | -0.561967 | 2.016201  |
| H | 0.276300  | -1.484406 | 1.756934  |
| C | 2.235608  | 0.173417  | -0.557509 |
| H | 2.816623  | 0.766198  | 0.153095  |
| H | 2.820291  | -0.711806 | -0.816199 |
| H | 2.097845  | 0.767987  | -1.459538 |
| O | 0.076808  | 2.011027  | -0.527894 |
| H | -0.420826 | 1.665927  | -1.276389 |

ax3

```
=====
```

|   |           |           |           |
|---|-----------|-----------|-----------|
| C | 0.880798  | -0.262809 | 0.054717  |
| C | 0.115716  | 1.004809  | 0.495584  |
| H | 0.663811  | 1.456544  | 1.330977  |
| C | -1.312567 | 0.705483  | 0.936261  |
| C | -2.094095 | -0.048059 | -0.140231 |
| H | -3.098417 | -0.273295 | 0.221916  |
| H | -2.204937 | 0.592631  | -1.018294 |
| C | 0.058205  | -1.026531 | -0.996558 |
| C | -1.370083 | -1.331931 | -0.543913 |
| H | -1.910675 | -1.832265 | -1.349249 |
| H | -1.356465 | -2.024180 | 0.302065  |
| H | -1.286159 | 0.115874  | 1.854331  |
| H | 0.013496  | -0.419240 | -1.905096 |
| H | 0.585012  | -1.948990 | -1.254982 |
| H | -1.801992 | 1.650560  | 1.177009  |
| C | 1.150128  | -1.138968 | 1.283134  |
| H | 1.718487  | -2.024044 | 0.990929  |
| H | 1.740278  | -0.591327 | 2.021416  |
| H | 0.237024  | -1.476660 | 1.770324  |

|   |          |           |           |
|---|----------|-----------|-----------|
| C | 2.232655 | 0.129031  | -0.546637 |
| H | 2.806421 | 0.749926  | 0.146651  |
| H | 2.821664 | -0.764954 | -0.759479 |
| H | 2.120338 | 0.671555  | -1.486975 |
| O | 0.011252 | 1.961488  | -0.560851 |
| H | 0.897560 | 2.239808  | -0.808883 |

eq

```
=====
```

|   |           |           |           |
|---|-----------|-----------|-----------|
| C | 0.684216  | -0.524269 | -0.015661 |
| C | 0.316852  | 0.918110  | -0.398747 |
| H | 0.235231  | 0.945940  | -1.493925 |
| C | -1.016261 | 1.372242  | 0.184680  |
| C | -2.149417 | 0.440751  | -0.242989 |
| H | -3.090670 | 0.763574  | 0.203758  |
| H | -2.273341 | 0.502016  | -1.328628 |
| C | -0.486333 | -1.434694 | -0.430718 |
| C | -1.835992 | -1.004069 | 0.142472  |
| H | -2.619256 | -1.669874 | -0.223828 |
| H | -1.828227 | -1.096782 | 1.231321  |
| H | -0.940963 | 1.399822  | 1.274400  |
| H | -0.554637 | -1.431428 | -1.523908 |
| H | -0.252312 | -2.459764 | -0.132555 |
| H | -1.215892 | 2.393621  | -0.150162 |
| C | 0.965274  | -0.651868 | 1.484800  |
| H | 1.225200  | -1.685671 | 1.721930  |
| H | 1.802807  | -0.016846 | 1.772726  |
| H | 0.108550  | -0.376172 | 2.098389  |
| C | 1.936226  | -0.948749 | -0.785441 |
| H | 2.795480  | -0.339694 | -0.504677 |
| H | 2.174762  | -1.993223 | -0.573686 |
| H | 1.783169  | -0.848594 | -1.862297 |
| O | 1.378442  | 1.778544  | 0.010361  |
| H | 1.135175  | 2.680008  | -0.222120 |

eq2

```
=====
```

|   |           |           |           |
|---|-----------|-----------|-----------|
| C | 0.683877  | -0.522682 | -0.020367 |
| C | 0.317590  | 0.920735  | -0.424009 |
| H | 0.252963  | 0.943141  | -1.516197 |
| C | -1.020876 | 1.381424  | 0.143252  |
| C | -2.153639 | 0.432079  | -0.244305 |
| H | -3.091416 | 0.765006  | 0.202575  |
| H | -2.288409 | 0.462595  | -1.329959 |
| C | -0.490646 | -1.440053 | -0.407128 |
| C | -1.832281 | -1.000651 | 0.176222  |
| H | -2.619227 | -1.677587 | -0.160551 |
| H | -1.807302 | -1.064595 | 1.267027  |
| H | -0.947441 | 1.444000  | 1.233677  |
| H | -0.573070 | -1.449488 | -1.499428 |
| H | -0.252705 | -2.461734 | -0.100183 |
| H | -1.220486 | 2.390134  | -0.222124 |
| C | 0.978250  | -0.624702 | 1.480096  |
| H | 1.196292  | -1.661916 | 1.742066  |

|   |          |           |           |
|---|----------|-----------|-----------|
| H | 1.855128 | -0.031896 | 1.748289  |
| H | 0.144621 | -0.294966 | 2.099317  |
| C | 1.928362 | -0.962198 | -0.792207 |
| H | 2.783184 | -0.330455 | -0.549952 |
| H | 2.185547 | -1.994154 | -0.543842 |
| H | 1.757204 | -0.906711 | -1.869507 |
| O | 1.349706 | 1.850733  | -0.103058 |
| H | 1.363653 | 1.959060  | 0.853927  |

eq3

```
=====
```

|   |           |           |           |
|---|-----------|-----------|-----------|
| C | 0.676276  | -0.522650 | -0.008009 |
| C | 0.314971  | 0.926000  | -0.396033 |
| H | 0.235193  | 0.953163  | -1.491289 |
| C | -1.014884 | 1.383254  | 0.181413  |
| C | -2.148759 | 0.453428  | -0.247256 |
| H | -3.088357 | 0.777304  | 0.202224  |
| H | -2.274431 | 0.520155  | -1.332351 |
| C | -0.492321 | -1.428299 | -0.438471 |
| C | -1.843097 | -0.995349 | 0.129862  |
| H | -2.627394 | -1.654939 | -0.245395 |
| H | -1.841823 | -1.096439 | 1.217913  |
| H | -0.942398 | 1.412297  | 1.271424  |
| H | -0.552974 | -1.416802 | -1.532163 |
| H | -0.264402 | -2.456550 | -0.146403 |
| H | -1.205745 | 2.403521  | -0.155342 |
| C | 0.942692  | -0.653349 | 1.493990  |
| H | 1.207407  | -1.685681 | 1.732232  |
| H | 1.773142  | -0.013798 | 1.793838  |
| H | 0.078348  | -0.383869 | 2.099278  |
| C | 1.933895  | -0.953777 | -0.766953 |
| H | 2.813604  | -0.384770 | -0.456620 |
| H | 2.149017  | -2.006735 | -0.574486 |
| H | 1.804425  | -0.826790 | -1.844093 |
| O | 1.298706  | 1.869608  | 0.021385  |
| H | 2.134106  | 1.647524  | -0.401107 |

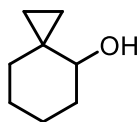

spiro[2.5]octan-4-ol

| Conformation | Electronic Energy | Enthalpy    | Gibbs Free Energy |
|--------------|-------------------|-------------|-------------------|
| ax           | -388.445907       | -388.227106 | -388.269148       |
| ax2          | -388.447224       | -388.228351 | -388.270284       |



|     |  |             |  |             |  |             |
|-----|--|-------------|--|-------------|--|-------------|
| ax3 |  | -388.446020 |  | -388.22707  |  | -388.268931 |
| eq  |  | -388.445798 |  | -388.226972 |  | -388.268985 |
| eq2 |  | -388.446155 |  | -388.227277 |  | -388.269129 |
| eq3 |  | -388.446340 |  | -388.227374 |  | -388.269119 |

ax

```
=====
```

|   |           |           |           |
|---|-----------|-----------|-----------|
| C | -0.842424 | -0.121582 | -0.064406 |
| C | -0.016271 | 1.094636  | 0.280556  |
| H | -0.589673 | 1.729517  | 0.964325  |
| C | -1.800869 | -0.600934 | 0.986164  |
| C | -2.312964 | 0.065936  | -0.267336 |
| C | 1.295969  | 0.682420  | 0.946030  |
| C | 2.062360  | -0.344071 | 0.110808  |
| H | 2.370321  | 0.113602  | -0.832729 |
| H | 2.972488  | -0.639495 | 0.634746  |
| C | -0.101231 | -1.157782 | -0.883194 |
| C | 1.195627  | -1.568818 | -0.184280 |
| H | 0.951903  | -2.072749 | 0.756382  |
| H | 1.745499  | -2.283196 | -0.798970 |
| H | -1.864672 | -0.044816 | 1.911347  |
| H | -1.940052 | -1.668888 | 1.081244  |
| H | -2.800572 | -0.556908 | -1.004380 |
| H | -2.709585 | 1.067507  | -0.174891 |
| H | 1.059181  | 0.256564  | 1.925120  |
| H | -0.746924 | -2.023058 | -1.044596 |
| H | 0.134476  | -0.738890 | -1.865414 |
| H | 1.905860  | 1.572091  | 1.123328  |
| O | 0.223266  | 1.808821  | -0.934588 |
| H | 0.844442  | 2.519323  | -0.744858 |

ax2

```
=====
```

|   |           |           |           |
|---|-----------|-----------|-----------|
| C | -0.826406 | -0.152916 | -0.045742 |
| C | -0.036851 | 1.091240  | 0.300455  |
| H | -0.621962 | 1.697322  | 1.000753  |
| C | -1.780118 | -0.660237 | 0.993570  |
| C | -2.302812 | 0.004263  | -0.257340 |
| C | 1.299423  | 0.729511  | 0.935796  |
| C | 2.085916  | -0.269204 | 0.085465  |
| H | 2.358717  | 0.199659  | -0.863002 |
| H | 3.015297  | -0.531299 | 0.593171  |
| C | -0.060034 | -1.161937 | -0.875143 |
| C | 1.259615  | -1.525394 | -0.193302 |
| H | 1.047121  | -2.035006 | 0.751887  |
| H | 1.825169  | -2.221642 | -0.814480 |
| H | -1.862207 | -0.111133 | 1.921515  |
| H | -1.898178 | -1.731387 | 1.080312  |
| H | -2.772072 | -0.623762 | -1.001738 |
| H | -2.728439 | 0.993745  | -0.153922 |
| H | 1.096514  | 0.293265  | 1.917452  |
| H | -0.676928 | -2.048931 | -1.030679 |
| H | 0.149818  | -0.735429 | -1.860404 |

|   |           |          |           |
|---|-----------|----------|-----------|
| H | 1.875547  | 1.642177 | 1.096528  |
| O | 0.242997  | 1.862817 | -0.869031 |
| H | -0.584766 | 1.977934 | -1.347699 |

ax3

```
=====
```

|   |           |           |           |
|---|-----------|-----------|-----------|
| C | -0.841138 | -0.126892 | -0.065072 |
| C | -0.029289 | 1.104475  | 0.281724  |
| H | -0.611673 | 1.737529  | 0.952598  |
| C | -1.792670 | -0.623645 | 0.983724  |
| C | -2.313491 | 0.037053  | -0.270056 |
| C | 1.280006  | 0.702435  | 0.960563  |
| C | 2.065525  | -0.312635 | 0.126863  |
| H | 2.389276  | 0.146464  | -0.813415 |
| H | 2.975604  | -0.597166 | 0.656280  |
| C | -0.082481 | -1.152523 | -0.882551 |
| C | 1.217737  | -1.548001 | -0.180521 |
| H | 0.976055  | -2.058816 | 0.756503  |
| H | 1.780520  | -2.251282 | -0.796046 |
| H | -1.864251 | -0.068192 | 1.908861  |
| H | -1.917577 | -1.693466 | 1.078697  |
| H | -2.790846 | -0.593684 | -1.007178 |
| H | -2.725164 | 1.032612  | -0.177883 |
| H | 1.038349  | 0.259068  | 1.930355  |
| H | -0.716473 | -2.024656 | -1.051245 |
| H | 0.150857  | -0.739236 | -1.870591 |
| H | 1.875288  | 1.597497  | 1.146777  |
| O | 0.210910  | 1.920063  | -0.867599 |
| H | 0.727564  | 1.411221  | -1.500959 |

eq

```
=====
```

|   |           |           |           |
|---|-----------|-----------|-----------|
| C | -0.614772 | -0.483009 | -0.177686 |
| C | -0.241160 | 0.962801  | -0.434703 |
| H | -0.044794 | 1.072004  | -1.509870 |
| C | -1.454221 | -0.805484 | 1.022636  |
| C | -2.028997 | -0.930205 | -0.370288 |
| C | 1.027105  | 1.324102  | 0.331415  |
| C | 2.176164  | 0.382069  | -0.029236 |
| H | 2.425734  | 0.507549  | -1.087352 |
| H | 3.067461  | 0.646453  | 0.541063  |
| C | 0.510196  | -1.434394 | -0.531388 |
| C | 1.789547  | -1.075028 | 0.224916  |
| H | 1.625489  | -1.222552 | 1.296542  |
| H | 2.602081  | -1.740024 | -0.071726 |
| H | -1.809453 | 0.016692  | 1.626173  |
| H | -1.226487 | -1.716602 | 1.558711  |
| H | -2.186133 | -1.925098 | -0.763718 |
| H | -2.756452 | -0.189107 | -0.666796 |
| H | 0.809375  | 1.256178  | 1.401434  |
| H | 0.202037  | -2.457403 | -0.308514 |
| H | 0.702180  | -1.382019 | -1.608438 |
| H | 1.297730  | 2.360536  | 0.114169  |
| O | -1.330079 | 1.801637  | -0.068837 |

H -1.051306 2.715189 -0.184980

eq2

```
=====
C -0.606480 -0.483568 -0.175490
C -0.246988 0.973190 -0.427680
H -0.053113 1.092195 -1.501396
C -1.419762 -0.821683 1.036918
C -2.017737 -0.952492 -0.345334
C 1.017075 1.338071 0.336082
C 2.171747 0.404472 -0.027991
H 2.425113 0.542843 -1.083572
H 3.058572 0.670264 0.548626
C 0.523113 -1.421463 -0.550684
C 1.799837 -1.059394 0.208350
H 1.638012 -1.222594 1.277963
H 2.618982 -1.712052 -0.097387
H -1.775606 -0.003758 1.646491
H -1.173086 -1.730254 1.568645
H -2.164137 -1.948201 -0.740466
H -2.781439 -0.239034 -0.623573
H 0.800917 1.265546 1.406274
H 0.226136 -2.450997 -0.343089
H 0.710707 -1.349670 -1.627389
H 1.276159 2.375917 0.121528
O -1.265712 1.881321 -0.029943
H -2.006358 1.796433 -0.638129
```

eq3

```
=====
C -0.615882 -0.480471 -0.178677
C -0.237993 0.968149 -0.450354
H -0.059572 1.071871 -1.525023
C -1.472125 -0.795303 1.012753
C -2.027006 -0.926393 -0.387123
C 1.038961 1.332472 0.299150
C 2.180943 0.371915 -0.033771
H 2.435634 0.473183 -1.093192
H 3.071493 0.642809 0.534732
C 0.508389 -1.441203 -0.510637
C 1.783675 -1.076554 0.248634
H 1.610844 -1.201405 1.321845
H 2.594035 -1.752527 -0.028427
H -1.849588 0.017279 1.618419
H -1.251115 -1.702612 1.557808
H -2.183990 -1.923011 -0.775932
H -2.746849 -0.182915 -0.696990
H 0.827274 1.290810 1.374048
H 0.195487 -2.460996 -0.279384
H 0.707797 -1.400911 -1.586982
H 1.313010 2.360643 0.057286
O -1.286142 1.882480 -0.159357
H -1.329092 1.992264 0.796794
```

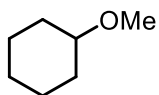

methoxycyclohexane

| Conformation | Electronic Energy | Enthalpy    | Gibbs Free Energy |
|--------------|-------------------|-------------|-------------------|
| ax           | -350.350558       | -350.13737  | -350.178635       |
| ax2          | -350.341566       | -350.128174 | -350.169576       |
| eq           | -350.351225       | -350.138237 | -350.180136       |
| eq2          | -350.348485       | -350.135292 | -350.1769         |

ax

|   |           |           |           |
|---|-----------|-----------|-----------|
| C | 0.099812  | 1.009050  | 0.907124  |
| C | 0.599691  | -0.420445 | 0.694143  |
| H | 1.220718  | -0.716374 | 1.548817  |
| C | -0.572646 | -1.382877 | 0.551234  |
| C | -1.524308 | -0.952632 | -0.566518 |
| H | -1.004842 | -1.022594 | -1.524988 |
| H | -2.373770 | -1.636126 | -0.611439 |
| C | -0.828723 | 1.447301  | -0.224370 |
| C | -2.008184 | 0.483121  | -0.360272 |
| H | -2.612532 | 0.530881  | 0.551526  |
| H | -2.653106 | 0.786150  | -1.186908 |
| H | -1.110302 | -1.406373 | 1.502700  |
| H | -1.185969 | 2.462100  | -0.042670 |
| H | -0.267864 | 1.467033  | -1.163116 |
| H | -0.189262 | -2.387722 | 0.366815  |
| O | 1.380834  | -0.552676 | -0.489687 |
| C | 2.562888  | 0.214986  | -0.485339 |
| H | 3.105705  | 0.102579  | 0.459374  |
| H | 3.190189  | -0.151110 | -1.296475 |
| H | 2.364959  | 1.277304  | -0.651612 |
| H | -0.442714 | 1.029280  | 1.856423  |
| H | 0.940934  | 1.695360  | 1.013037  |

ax2

|   |           |           |           |
|---|-----------|-----------|-----------|
| C | 0.307547  | 1.436429  | -0.460230 |
| C | -0.668354 | 0.338617  | -0.899173 |
| H | -1.019953 | 0.605813  | -1.896955 |
| C | 0.015992  | -1.028800 | -1.010229 |

|   |           |           |           |
|---|-----------|-----------|-----------|
| C | 0.982238  | -1.378740 | 0.127479  |
| H | 0.438912  | -1.581464 | 1.051516  |
| H | 1.513534  | -2.296499 | -0.131193 |
| C | 1.243965  | 1.056764  | 0.688432  |
| C | 1.977160  | -0.246594 | 0.377742  |
| H | 2.595825  | -0.104425 | -0.514466 |
| H | 2.650052  | -0.510256 | 1.195214  |
| H | 0.591243  | -1.007364 | -1.940159 |
| H | 1.960499  | 1.864540  | 0.848511  |
| H | 0.686052  | 0.945990  | 1.620378  |
| H | -0.744879 | -1.802137 | -1.133780 |
| O | -1.881985 | 0.342937  | -0.141266 |
| C | -1.922785 | -0.374815 | 1.072519  |
| H | -1.186377 | -0.021314 | 1.796807  |
| H | -2.916787 | -0.216340 | 1.488817  |
| H | -1.784619 | -1.447647 | 0.918669  |
| H | 0.925439  | 1.677949  | -1.330950 |
| H | -0.267640 | 2.332498  | -0.221523 |

eq

```
=====
```

|   |           |           |           |
|---|-----------|-----------|-----------|
| C | -0.352788 | -1.347414 | -0.194596 |
| C | 0.592084  | -0.228302 | 0.212807  |
| H | 0.652662  | -0.193829 | 1.310664  |
| C | 0.088794  | 1.121814  | -0.290276 |
| C | -1.334177 | 1.391672  | 0.203470  |
| H | -1.324943 | 1.475195  | 1.294730  |
| H | -1.684776 | 2.349371  | -0.183713 |
| C | -1.775119 | -1.081905 | 0.297820  |
| C | -2.286066 | 0.268175  | -0.202943 |
| H | -2.363819 | 0.240461  | -1.294242 |
| H | -3.287387 | 0.461876  | 0.185184  |
| H | 0.106425  | 1.105665  | -1.384783 |
| H | -2.436230 | -1.886076 | -0.027888 |
| H | -1.784828 | -1.085060 | 1.392119  |
| H | 0.753420  | 1.921739  | 0.038176  |
| O | 1.876117  | -0.558985 | -0.298418 |
| C | 2.913291  | 0.269432  | 0.179794  |
| H | 2.876301  | 0.358049  | 1.270713  |
| H | 3.855749  | -0.196413 | -0.102735 |
| H | 2.876405  | 1.270856  | -0.255764 |
| H | -0.347833 | -1.416391 | -1.286752 |
| H | 0.023797  | -2.294390 | 0.195182  |

eq2

```
=====
```

|   |           |           |           |
|---|-----------|-----------|-----------|
| C | 0.078663  | -1.279403 | 0.072158  |
| C | -0.557618 | -0.063156 | -0.595154 |
| H | -0.288309 | -0.084868 | -1.655232 |
| C | -0.013041 | 1.230857  | 0.000734  |
| C | 1.507707  | 1.286065  | -0.161108 |
| H | 1.756101  | 1.309341  | -1.226503 |
| H | 1.895515  | 2.206911  | 0.276601  |
| C | 1.600641  | -1.231621 | -0.082980 |

|   |           |           |           |
|---|-----------|-----------|-----------|
| C | 2.171606  | 0.068754  | 0.482526  |
| H | 1.998245  | 0.096356  | 1.562832  |
| H | 3.251663  | 0.103870  | 0.330884  |
| H | -0.257231 | 1.275985  | 1.065750  |
| H | 2.053650  | -2.092736 | 0.410243  |
| H | 1.855108  | -1.301959 | -1.144990 |
| H | -0.488586 | 2.085860  | -0.484277 |
| O | -1.981853 | -0.127273 | -0.609699 |
| C | -2.618976 | 0.075895  | 0.634702  |
| H | -2.542482 | 1.113766  | 0.967800  |
| H | -3.671337 | -0.162392 | 0.490069  |
| H | -2.222314 | -0.576606 | 1.416269  |
| H | -0.170647 | -1.291090 | 1.136600  |
| H | -0.328447 | -2.188598 | -0.373725 |

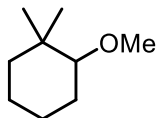

2-methoxy-1,1-dimethylcyclohexane

| Conformation | Electronic Energy | Enthalpy    | Gibbs Free Energy |
|--------------|-------------------|-------------|-------------------|
| ax           | -428.964672       | -428.69288  | -428.739858       |
| ax2          | -428.963510       | -428.691866 | -428.739651       |
| ax3          | -428.956634       | -428.684483 | -428.730627       |
| eq           | -428.965357       | -428.693731 | -428.741864       |
| eq2          | -428.965357       | -428.693731 | -428.741869       |
| eq3          | -428.960734       | -428.68876  | -428.735152       |

ax

|   |           |           |           |
|---|-----------|-----------|-----------|
| C | 0.894072  | -0.666344 | 0.040713  |
| C | -0.529607 | -0.392455 | 0.562100  |
| H | -0.730676 | -1.071450 | 1.402719  |
| C | 1.891920  | -0.573920 | 1.200681  |
| C | 0.972241  | -2.081582 | -0.534416 |
| C | -0.704886 | 1.055333  | 1.024200  |
| C | -0.382710 | 2.034222  | -0.103825 |
| H | -1.097760 | 1.888920  | -0.918318 |
| H | -0.499222 | 3.060840  | 0.246740  |
| C | 1.239242  | 0.353754  | -1.059396 |
| C | 1.035131  | 1.808135  | -0.630026 |
| H | 1.754366  | 2.073060  | 0.149322  |
| H | 1.233320  | 2.469440  | -1.475410 |
| H | 1.622327  | -1.273198 | 1.995377  |
| H | 1.949515  | 0.421664  | 1.636673  |
| H | 0.310191  | -2.199846 | -1.390189 |
| H | 0.691400  | -2.821787 | 0.219020  |

|   |           |           |           |
|---|-----------|-----------|-----------|
| H | -0.045110 | 1.234501  | 1.874965  |
| H | 2.273093  | 0.192789  | -1.376622 |
| H | 0.603745  | 0.150599  | -1.925414 |
| H | -1.721357 | 1.204960  | 1.390038  |
| O | -1.434010 | -0.710904 | -0.491001 |
| C | -2.793389 | -0.638881 | -0.127297 |
| H | -3.152632 | 0.392150  | -0.069957 |
| H | -3.361696 | -1.160216 | -0.896111 |
| H | -2.973088 | -1.127389 | 0.836373  |
| H | 1.993310  | -2.298581 | -0.854965 |
| H | 2.890265  | -0.838799 | 0.847352  |

ax2

```
=====
```

|   |           |           |           |
|---|-----------|-----------|-----------|
| C | -0.185670 | 0.989847  | 0.052614  |
| C | 0.581580  | -0.245051 | 0.566858  |
| H | 1.195645  | 0.065573  | 1.419243  |
| C | -0.942273 | 1.644204  | 1.213593  |
| C | 0.804058  | 2.012156  | -0.506972 |
| C | -0.345944 | -1.380384 | 0.995401  |
| C | -1.290831 | -1.783230 | -0.136892 |
| H | -0.702346 | -2.192043 | -0.961963 |
| H | -1.962514 | -2.573704 | 0.201523  |
| C | -1.156599 | 0.556490  | -1.059010 |
| C | -2.089942 | -0.580913 | -0.639725 |
| H | -2.767969 | -0.239507 | 0.146747  |
| H | -2.714541 | -0.872694 | -1.485898 |
| H | -0.249223 | 1.934360  | 2.006557  |
| H | -1.695440 | 0.991634  | 1.651777  |
| H | 1.380939  | 1.591996  | -1.330721 |
| H | 1.500119  | 2.346372  | 0.266286  |
| H | -0.923523 | -1.068404 | 1.868121  |
| H | -1.734627 | 1.426300  | -1.382366 |
| H | -0.565956 | 0.226934  | -1.918702 |
| H | 0.269515  | -2.227950 | 1.303498  |
| O | 1.439059  | -0.744199 | -0.461680 |
| C | 2.808852  | -0.688107 | -0.135165 |
| H | 3.031999  | -1.284753 | 0.755430  |
| H | 3.363764  | -1.097288 | -0.978173 |
| H | 3.140431  | 0.339902  | 0.040157  |
| H | 0.268902  | 2.889542  | -0.876497 |
| H | -1.447024 | 2.547242  | 0.864213  |

ax3

```
=====
```

|   |           |           |           |
|---|-----------|-----------|-----------|
| C | -0.927751 | 0.501945  | -0.009354 |
| C | 0.361728  | 0.451527  | 0.858244  |
| H | 0.094550  | 0.900921  | 1.817541  |
| C | -2.113131 | 0.208529  | 0.923037  |
| C | -1.109605 | 1.903622  | -0.588778 |
| C | 0.843716  | -0.977730 | 1.146752  |
| C | 0.806610  | -1.947135 | -0.038617 |
| H | 1.561795  | -1.684387 | -0.780918 |
| H | 1.050503  | -2.950076 | 0.316513  |

|   |           |           |           |
|---|-----------|-----------|-----------|
| C | -0.925964 | -0.525813 | -1.158274 |
| C | -0.564557 | -1.939502 | -0.708737 |
| H | -1.316719 | -2.316024 | -0.010456 |
| H | -0.568038 | -2.612417 | -1.567825 |
| H | -2.214321 | 0.997582  | 1.670450  |
| H | -2.001121 | -0.738105 | 1.452083  |
| H | -0.322738 | 2.144457  | -1.303959 |
| H | -1.089443 | 2.659181  | 0.199173  |
| H | 0.198926  | -1.383022 | 1.930327  |
| H | -1.916203 | -0.517010 | -1.621987 |
| H | -0.220440 | -0.212538 | -1.931367 |
| H | 1.847173  | -0.919801 | 1.573744  |
| O | 1.399941  | 1.323577  | 0.411550  |
| C | 2.209387  | 0.902476  | -0.663178 |
| H | 1.629610  | 0.646706  | -1.552158 |
| H | 2.859526  | 1.741870  | -0.907312 |
| H | 2.837868  | 0.050844  | -0.391294 |
| H | -2.071764 | 1.971562  | -1.101483 |
| H | -3.041295 | 0.164130  | 0.349962  |

eq

```
=====
```

|   |           |           |           |
|---|-----------|-----------|-----------|
| C | -0.283363 | 0.950130  | -0.019838 |
| C | 0.602326  | -0.293112 | -0.213947 |
| H | 0.725041  | -0.434651 | -1.297763 |
| C | -0.381263 | 1.337993  | 1.458891  |
| C | 0.320684  | 2.122506  | -0.794424 |
| C | -0.014271 | -1.562631 | 0.368625  |
| C | -1.395597 | -1.827468 | -0.229181 |
| H | -1.291233 | -2.019999 | -1.301651 |
| H | -1.830838 | -2.724374 | 0.213826  |
| C | -1.677054 | 0.640719  | -0.596758 |
| C | -2.314864 | -0.624870 | -0.025777 |
| H | -2.515097 | -0.496424 | 1.040907  |
| H | -3.278395 | -0.799690 | -0.507607 |
| H | 0.606158  | 1.567949  | 1.859200  |
| H | -0.817528 | 0.550255  | 2.071910  |
| H | 0.420788  | 1.878088  | -1.854388 |
| H | 1.307019  | 2.379618  | -0.408205 |
| H | -0.090245 | -1.453338 | 1.453147  |
| H | -2.323292 | 1.506075  | -0.428720 |
| H | -1.581924 | 0.523062  | -1.681648 |
| H | 0.647906  | -2.408140 | 0.176243  |
| O | 1.880092  | -0.035534 | 0.354670  |
| C | 2.921868  | -0.768368 | -0.250075 |
| H | 3.012914  | -0.517402 | -1.311992 |
| H | 3.846910  | -0.498563 | 0.256545  |
| H | 2.776269  | -1.848005 | -0.156479 |
| H | -0.319458 | 3.003340  | -0.710515 |
| H | -1.006530 | 2.227080  | 1.564745  |

eq2

```
=====
```

|   |           |          |           |
|---|-----------|----------|-----------|
| C | -0.283540 | 0.950122 | -0.019853 |
|---|-----------|----------|-----------|



|   |           |           |           |
|---|-----------|-----------|-----------|
| C | 0.602365  | -0.292932 | -0.214144 |
| H | 0.724963  | -0.434430 | -1.297975 |
| C | -0.381361 | 1.337869  | 1.458917  |
| C | 0.320167  | 2.122681  | -0.794400 |
| C | -0.013925 | -1.562598 | 0.368470  |
| C | -1.395297 | -1.827672 | -0.229130 |
| H | -1.291045 | -2.020197 | -1.301610 |
| H | -1.830315 | -2.724653 | 0.213942  |
| C | -1.677242 | 0.640472  | -0.596642 |
| C | -2.314765 | -0.625244 | -0.025623 |
| H | -2.514924 | -0.496844 | 1.041079  |
| H | -3.278307 | -0.800243 | -0.507363 |
| H | 0.606035  | 1.568113  | 1.859117  |
| H | -0.817293 | 0.549968  | 2.071954  |
| H | 0.420216  | 1.878382  | -1.854394 |
| H | 1.306479  | 2.380008  | -0.408258 |
| H | -0.089733 | -1.453380 | 1.453008  |
| H | -2.323607 | 1.505712  | -0.428506 |
| H | -1.582202 | 0.522863  | -1.681543 |
| H | 0.648341  | -2.407992 | 0.175931  |
| O | 1.880163  | -0.034999 | 0.354252  |
| C | 2.922015  | -0.768270 | -0.249814 |
| H | 3.012421  | -0.519037 | -1.312189 |
| H | 3.847168  | -0.497129 | 0.255894  |
| H | 2.777069  | -1.847825 | -0.154344 |
| H | -0.320183 | 3.003349  | -0.710339 |
| H | -1.006893 | 2.226751  | 1.564901  |

eq3

```
=====
```

|   |           |           |           |
|---|-----------|-----------|-----------|
| C | -0.164788 | 0.957309  | -0.008152 |
| C | 0.480493  | -0.296878 | -0.636794 |
| H | 0.229468  | -0.263539 | -1.702915 |
| C | 0.210860  | 1.126964  | 1.467584  |
| C | 0.306475  | 2.197029  | -0.770015 |
| C | -0.077832 | -1.607560 | -0.088338 |
| C | -1.594125 | -1.665848 | -0.272874 |
| H | -1.828401 | -1.664339 | -1.341817 |
| H | -1.981172 | -2.599329 | 0.137963  |
| C | -1.691746 | 0.835839  | -0.169504 |
| C | -2.266525 | -0.464562 | 0.387250  |
| H | -2.114093 | -0.510802 | 1.468837  |
| H | -3.344321 | -0.494297 | 0.218556  |
| H | 1.276192  | 1.335650  | 1.571278  |
| H | -0.024020 | 0.248979  | 2.069181  |
| H | 0.053302  | 2.122616  | -1.830019 |
| H | 1.385882  | 2.321568  | -0.684863 |
| H | 0.155617  | -1.711059 | 0.973299  |
| H | -2.162490 | 1.701115  | 0.304084  |
| H | -1.930701 | 0.890829  | -1.237035 |
| H | 0.399776  | -2.440702 | -0.607400 |
| O | 1.908716  | -0.223080 | -0.612519 |
| C | 2.587204  | -0.909671 | 0.420750  |
| H | 2.540837  | -1.993426 | 0.289732  |

|   |           |           |           |
|---|-----------|-----------|-----------|
| H | 3.629871  | -0.601287 | 0.358830  |
| H | 2.212619  | -0.660754 | 1.414706  |
| H | -0.173821 | 3.092983  | -0.370377 |
| H | -0.334371 | 1.974697  | 1.888670  |

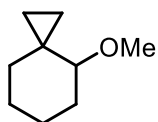

4-methoxyspiro[2.5]octane

| Conformation | Electronic Energy | Enthalpy    | Gibbs Free Energy |
|--------------|-------------------|-------------|-------------------|
| ax           | -427.734228       | -427.48564  | -427.530967       |
| ax2          | -427.735125       | -427.486545 | -427.531358       |
| ax3          | -427.726136       | -427.477088 | -427.522176       |
| ax4          | -427.726512       | -427.477505 | -427.522638       |
| eq           | -427.733542       | -427.484981 | -427.530805       |
| eq2          | -427.732911       | -427.484309 | -427.529667       |
| eq3          | -427.728421       | -427.479569 | -427.524518       |
| eq4          | -427.726496       | -427.477562 | -427.522626       |

ax

|   |           |           |           |
|---|-----------|-----------|-----------|
| C | 0.931821  | -0.470107 | -0.069791 |
| C | -0.481103 | -0.538464 | 0.461013  |
| H | -0.554815 | -1.344688 | 1.202504  |
| C | 2.027121  | -0.853321 | 0.881035  |
| C | 1.668474  | -1.755640 | -0.275161 |
| C | -0.858630 | 0.793117  | 1.113242  |
| C | -0.670190 | 1.958605  | 0.142469  |
| H | -1.350069 | 1.834910  | -0.705194 |
| H | -0.934915 | 2.896840  | 0.632107  |
| C | 1.172880  | 0.687796  | -1.016493 |
| C | 0.770925  | 2.013836  | -0.367984 |
| H | 1.439724  | 2.218456  | 0.474003  |
| H | 0.891292  | 2.831710  | -1.080202 |
| H | 1.749909  | -1.177859 | 1.874646  |
| H | 2.954470  | -0.300700 | 0.820084  |
| H | 2.361288  | -1.809977 | -1.103485 |
| H | 1.146664  | -2.675225 | -0.049076 |
| H | -0.207869 | 0.928698  | 1.981397  |
| H | 2.224157  | 0.704007  | -1.310590 |
| H | 0.582752  | 0.535817  | -1.924397 |
| H | -1.881516 | 0.756953  | 1.489623  |
| O | -1.323667 | -0.861495 | -0.640678 |
| C | -2.678261 | -1.038678 | -0.291388 |
| H | -3.182916 | -0.087672 | -0.101753 |

|   |           |           |           |
|---|-----------|-----------|-----------|
| H | -3.167569 | -1.528798 | -1.131393 |
| H | -2.779476 | -1.673376 | 0.595497  |

ax2

```
=====
C  0.316126    0.790510   -0.004490
C  0.358982   -0.544781    0.714264
H  1.033093   -0.463207    1.577426
C  0.379962    2.015094    0.862872
C  1.540531    1.654494   -0.026984
C -1.043456   -0.930507    1.172298
C -2.032436   -0.934618    0.004126
H -1.750464   -1.720551   -0.700151
H -3.032059   -1.174791    0.369608
C -0.638454    0.804315   -1.179182
C -2.045396    0.411863   -0.722066
H -2.424766    1.182775   -0.044049
H -2.723343    0.373619   -1.576291
H  0.505344    1.875233    1.928233
H -0.234875    2.857954    0.579168
H  1.709192    2.257688   -0.908634
H  2.434661    1.278600    0.450697
H -1.366265   -0.208027    1.925846
H -0.642848    1.795271   -1.637169
H -0.289725    0.095542   -1.936698
H -1.006552   -1.910836    1.649625
O  0.812318   -1.604153   -0.120033
C  2.134959   -1.452438   -0.584760
H  2.821458   -1.229513    0.238914
H  2.425294   -2.398507   -1.038749
H  2.218399   -0.661610   -1.333989
```

ax3

```
=====
C  0.972558   -0.148041   -0.077284
C -0.194865   -0.673365    0.746491
H  0.229750   -1.155961    1.628348
C  2.273465   -0.004626    0.670205
C  2.092035   -1.104108   -0.344094
C -1.092399    0.472470    1.232568
C -1.381386    1.569398    0.200668
H -2.042698    1.200348   -0.584650
H -1.907755    2.387359    0.695618
C  0.670598    0.934610   -1.096149
C -0.093882    2.083793   -0.441214
H  0.537926    2.542727    0.325744
H -0.321194    2.856468   -1.177111
H  2.296150   -0.283116    1.714561
H  2.908084    0.828836    0.402643
H  2.616426   -1.011733   -1.285151
H  1.982608   -2.114487    0.024499
H -0.569904    0.935768    2.074046
H  1.610891    1.290256   -1.522609
H  0.081768    0.531929   -1.923738
```

|   |           |           |           |
|---|-----------|-----------|-----------|
| H | -2.018810 | 0.054507  | 1.631259  |
| O | -0.895262 | -1.751904 | 0.123800  |
| C | -1.878475 | -1.443549 | -0.839757 |
| H | -1.479102 | -0.872363 | -1.680069 |
| H | -2.248040 | -2.396006 | -1.217408 |
| H | -2.719893 | -0.898792 | -0.404988 |

ax4

```
=====
```

|   |           |           |           |
|---|-----------|-----------|-----------|
| C | -0.818254 | -0.386925 | -0.010884 |
| C | -0.075776 | 0.608868  | 0.865092  |
| H | -0.641782 | 0.714216  | 1.792303  |
| C | -1.803069 | -1.269111 | 0.713413  |
| C | -2.288889 | -0.167552 | -0.191322 |
| C | 1.319069  | 0.091876  | 1.234807  |
| C | 2.106852  | -0.517857 | 0.073932  |
| H | 2.375124  | 0.251830  | -0.653004 |
| H | 3.043561  | -0.930023 | 0.453100  |
| C | -0.031482 | -1.043169 | -1.133288 |
| C | 1.291412  | -1.608932 | -0.618233 |
| H | 1.087763  | -2.412705 | 0.096341  |
| H | 1.857939  | -2.045575 | -1.442008 |
| H | -1.921712 | -1.135921 | 1.779372  |
| H | -1.901542 | -2.287011 | 0.363025  |
| H | -2.722244 | -0.449716 | -1.141025 |
| H | -2.722049 | 0.708618  | 0.271127  |
| H | 1.181013  | -0.683112 | 1.995292  |
| H | -0.642448 | -1.833903 | -1.573338 |
| H | 0.176186  | -0.324985 | -1.929100 |
| H | 1.873981  | 0.905200  | 1.704452  |
| O | -0.045204 | 1.951591  | 0.368720  |
| C | 0.111745  | 2.157361  | -1.018220 |
| H | -0.708564 | 1.717390  | -1.589818 |
| H | 0.097148  | 3.235797  | -1.170868 |
| H | 1.059610  | 1.769822  | -1.397395 |

eq

```
=====
```

|   |           |           |           |
|---|-----------|-----------|-----------|
| C | -0.339688 | 0.871721  | -0.168623 |
| C | 0.600127  | -0.314577 | -0.280651 |
| H | 0.690747  | -0.576374 | -1.345355 |
| C | -0.194164 | 1.791042  | 1.007771  |
| C | 0.187480  | 2.255307  | -0.379551 |
| C | 0.027613  | -1.513145 | 0.475285  |
| C | -1.379059 | -1.856969 | -0.016596 |
| H | -1.327623 | -2.166814 | -1.065103 |
| H | -1.771739 | -2.705105 | 0.545798  |
| C | -1.740907 | 0.547492  | -0.645677 |
| C | -2.313977 | -0.654550 | 0.104302  |
| H | -2.433478 | -0.395366 | 1.160560  |
| H | -3.304184 | -0.902117 | -0.281387 |
| H | 0.613745  | 1.601865  | 1.699220  |
| H | -1.099728 | 2.190742  | 1.443287  |

|   |           |           |           |
|---|-----------|-----------|-----------|
| H | -0.464526 | 2.964829  | -0.870198 |
| H | 1.241901  | 2.366837  | -0.584300 |
| H | -0.002648 | -1.256122 | 1.538391  |
| H | -2.377587 | 1.424859  | -0.518375 |
| H | -1.712899 | 0.321770  | -1.717188 |
| H | 0.686197  | -2.375152 | 0.362598  |
| O | 1.879156  | 0.053670  | 0.206433  |
| C | 2.919580  | -0.783240 | -0.249757 |
| H | 2.953220  | -0.806892 | -1.343572 |
| H | 3.854122  | -0.368729 | 0.123570  |
| H | 2.819197  | -1.806079 | 0.121571  |

eq2

```
=====
```

|   |           |           |           |
|---|-----------|-----------|-----------|
| C | -0.081789 | 0.827268  | -0.141008 |
| C | 0.467560  | -0.589317 | -0.165946 |
| H | 0.545109  | -0.908180 | -1.213250 |
| C | 0.193987  | 1.670020  | 1.068415  |
| C | 0.850719  | 1.991967  | -0.253540 |
| C | -0.488064 | -1.532541 | 0.553744  |
| C | -1.890084 | -1.462355 | -0.054146 |
| H | -1.850262 | -1.825671 | -1.085818 |
| H | -2.564611 | -2.125182 | 0.489486  |
| C | -1.462102 | 0.916797  | -0.758794 |
| C | -2.430165 | -0.031790 | -0.050082 |
| H | -2.562323 | 0.300998  | 0.983711  |
| H | -3.410628 | 0.003192  | -0.527602 |
| H | 0.827939  | 1.253665  | 1.837878  |
| H | -0.596752 | 2.322018  | 1.413344  |
| H | 0.501285  | 2.860955  | -0.793874 |
| H | 1.909639  | 1.791952  | -0.330018 |
| H | -0.522561 | -1.245053 | 1.608770  |
| H | -1.820274 | 1.946633  | -0.706659 |
| H | -1.403456 | 0.647514  | -1.818895 |
| H | -0.093727 | -2.548871 | 0.501451  |
| O | 1.750187  | -0.665272 | 0.439031  |
| C | 2.801343  | -0.859181 | -0.484516 |
| H | 3.735478  | -0.829247 | 0.073729  |
| H | 2.715159  | -1.830760 | -0.980826 |
| H | 2.820058  | -0.076997 | -1.248436 |

eq3

```
=====
```

|   |           |           |           |
|---|-----------|-----------|-----------|
| C | -0.167302 | 0.902975  | -0.166916 |
| C | 0.437421  | -0.409457 | -0.646171 |
| H | 0.191236  | -0.500713 | -1.710321 |
| C | 0.465611  | 1.646105  | 0.973709  |
| C | 0.559150  | 2.182861  | -0.435240 |
| C | -0.194111 | -1.600184 | 0.072185  |
| C | -1.715138 | -1.580628 | -0.086026 |
| H | -1.971874 | -1.685978 | -1.144537 |
| H | -2.148083 | -2.436062 | 0.434017  |
| C | -1.679866 | 0.918740  | -0.274380 |
| C | -2.303923 | -0.275032 | 0.445190  |

|   |           |           |           |
|---|-----------|-----------|-----------|
| H | -2.102649 | -0.198054 | 1.518019  |
| H | -3.387567 | -0.267037 | 0.318318  |
| H | 1.376404  | 1.259812  | 1.405131  |
| H | -0.194001 | 2.151182  | 1.666017  |
| H | -0.036809 | 3.049072  | -0.687814 |
| H | 1.524849  | 2.119977  | -0.914890 |
| H | 0.049250  | -1.562282 | 1.136720  |
| H | -2.061865 | 1.860327  | 0.124216  |
| H | -1.960213 | 0.880814  | -1.332798 |
| H | 0.217667  | -2.527781 | -0.329035 |
| O | 1.863288  | -0.383273 | -0.606624 |
| C | 2.510123  | -1.032147 | 0.471263  |
| H | 2.418525  | -2.118707 | 0.406786  |
| H | 3.564036  | -0.769492 | 0.395013  |
| H | 2.143004  | -0.708299 | 1.446457  |

eq4

```
=====
```

|   |           |           |           |
|---|-----------|-----------|-----------|
| C | -0.062122 | 0.854664  | -0.208584 |
| C | 0.361088  | -0.550306 | -0.616075 |
| H | 0.027114  | -0.678388 | -1.651003 |
| C | 0.524007  | 1.538505  | 0.994067  |
| C | 0.865916  | 2.009245  | -0.402267 |
| C | -0.387831 | -1.581248 | 0.226325  |
| C | -1.897113 | -1.408756 | 0.028057  |
| H | -2.146434 | -1.622740 | -1.015597 |
| H | -2.437171 | -2.132817 | 0.639494  |
| C | -1.550894 | 1.048164  | -0.428425 |
| C | -2.346835 | 0.013184  | 0.369139  |
| H | -2.191865 | 0.192766  | 1.437238  |
| H | -3.414654 | 0.126753  | 0.175677  |
| H | 1.292490  | 1.051242  | 1.572200  |
| H | -0.150917 | 2.155051  | 1.572555  |
| H | 0.449349  | 2.949761  | -0.735751 |
| H | 1.859635  | 1.784748  | -0.764388 |
| H | -0.152302 | -1.448874 | 1.284845  |
| H | -1.834860 | 2.061507  | -0.138641 |
| H | -1.778011 | 0.938806  | -1.493962 |
| H | -0.072087 | -2.585017 | -0.064805 |
| O | 1.759751  | -0.777964 | -0.715101 |
| C | 2.528721  | -0.887438 | 0.468601  |
| H | 1.953862  | -1.270800 | 1.311403  |
| H | 3.338256  | -1.586737 | 0.260233  |
| H | 2.969963  | 0.072367  | 0.746288  |

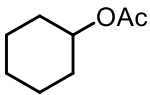

cyclohexyl acetate

| Conformation | Electronic Energy | Enthalpy    | Gibbs Free Energy |
|--------------|-------------------|-------------|-------------------|
| ax           | -463.717580       | -463.49268  | -463.539456       |
| ax2          | -463.704904       | -463.479797 | -463.52696        |
| eq           | -463.718499       | -463.493656 | -463.540647       |
| eq2          | -463.713924       | -463.48906  | -463.535763       |

ax

|   |           |           |           |
|---|-----------|-----------|-----------|
| C | 1.214500  | -0.999986 | 1.088749  |
| C | 0.123187  | 0.044182  | 0.911885  |
| H | -0.395782 | 0.215676  | 1.853050  |
| C | 0.672546  | 1.355750  | 0.362868  |
| C | 1.489473  | 1.144193  | -0.912115 |
| H | 0.831072  | 0.790224  | -1.710113 |
| H | 1.904883  | 2.097127  | -1.242462 |
| C | 2.032937  | -1.203632 | -0.186583 |
| C | 2.603932  | 0.122242  | -0.688955 |
| H | 3.307427  | 0.514835  | 0.052295  |
| H | 3.164671  | -0.033315 | -1.611912 |
| H | 1.309313  | 1.790728  | 1.137989  |
| H | 2.835292  | -1.917732 | 0.003352  |
| H | 1.395411  | -1.637566 | -0.961129 |
| H | -0.149766 | 2.050593  | 0.192045  |
| O | -0.833214 | -0.516691 | -0.022567 |
| C | -2.073802 | -0.019636 | -0.010677 |
| O | -2.441943 | 0.844676  | 0.747269  |
| C | -2.934938 | -0.674523 | -1.048741 |
| H | -2.512580 | -0.490385 | -2.036370 |
| H | -2.948389 | -1.751819 | -0.888248 |
| H | -3.942767 | -0.276012 | -0.996187 |
| H | 0.765909  | -1.937315 | 1.420555  |
| H | 1.869553  | -0.650444 | 1.890925  |

ax2

|   |          |           |           |
|---|----------|-----------|-----------|
| C | 0.845177 | -1.251456 | 0.851089  |
| C | 0.128165 | 0.053689  | 1.213212  |
| H | 0.080506 | 0.101477  | 2.298610  |
| C | 0.844443 | 1.322281  | 0.737642  |
| C | 1.584160 | 1.232333  | -0.598817 |
| H | 0.876833 | 1.226013  | -1.425667 |
| H | 2.209753 | 2.120414  | -0.706862 |
| C | 1.586430 | -1.278959 | -0.487370 |

|   |           |           |           |
|---|-----------|-----------|-----------|
| C | 2.444992  | -0.027872 | -0.663359 |
| H | 3.200004  | 0.008130  | 0.129655  |
| H | 2.981230  | -0.069780 | -1.612713 |
| H | 1.584483  | 1.548036  | 1.510672  |
| H | 2.213755  | -2.171931 | -0.515709 |
| H | 0.879765  | -1.347244 | -1.311885 |
| H | 0.131998  | 2.149078  | 0.743082  |
| O | -1.300103 | 0.040954  | 0.917281  |
| C | -1.778541 | -0.016396 | -0.323113 |
| O | -1.098227 | -0.063848 | -1.317961 |
| C | -3.280110 | -0.012066 | -0.320692 |
| H | -3.648331 | -0.850690 | 0.269008  |
| H | -3.640276 | 0.904953  | 0.144689  |
| H | -3.648864 | -0.081140 | -1.338831 |
| H | 0.133013  | -2.074914 | 0.928170  |
| H | 1.584478  | -1.408578 | 1.641660  |

eq

```
=====
```

|   |           |           |           |
|---|-----------|-----------|-----------|
| C | -1.004160 | -1.389620 | 0.016890  |
| C | -0.090774 | -0.190879 | 0.195638  |
| H | 0.010210  | 0.045365  | 1.255978  |
| C | -0.607796 | 1.025105  | -0.556903 |
| C | -2.023034 | 1.372225  | -0.091755 |
| H | -1.992794 | 1.666472  | 0.961644  |
| H | -2.394596 | 2.231048  | -0.651716 |
| C | -2.420977 | -1.047961 | 0.480842  |
| C | -2.962749 | 0.177985  | -0.254047 |
| H | -3.063510 | -0.056852 | -1.318072 |
| H | -3.958411 | 0.428313  | 0.115093  |
| H | -0.618089 | 0.787658  | -1.624782 |
| H | -3.075307 | -1.906529 | 0.326586  |
| H | -2.407660 | -0.845250 | 1.555932  |
| H | 0.068251  | 1.866930  | -0.407213 |
| O | 1.210052  | -0.571520 | -0.305317 |
| C | 2.272136  | 0.098151  | 0.155575  |
| O | 2.203299  | 0.976295  | 0.980539  |
| C | 3.540700  | -0.383925 | -0.481229 |
| H | 3.641084  | -1.458669 | -0.336406 |
| H | 3.498667  | -0.194679 | -1.553747 |
| H | 4.389971  | 0.133857  | -0.047720 |
| H | -0.606805 | -2.238766 | 0.574495  |
| H | -1.017894 | -1.663591 | -1.041914 |

eq2

```
=====
```

|   |           |           |           |
|---|-----------|-----------|-----------|
| C | -0.661184 | 1.264829  | -0.053898 |
| C | -0.129824 | -0.000051 | -0.712457 |
| H | -0.454898 | -0.000297 | -1.754628 |
| C | -0.660755 | -1.264817 | -0.053443 |
| C | -2.190434 | -1.260907 | -0.118303 |
| H | -2.508643 | -1.304778 | -1.164273 |
| H | -2.580824 | -2.153328 | 0.372029  |
| C | -2.190808 | 1.260526  | -0.118705 |



|   |           |           |           |
|---|-----------|-----------|-----------|
| C | -2.764915 | -0.000172 | 0.528529  |
| H | -2.517747 | 0.000001  | 1.594528  |
| H | -3.853222 | -0.000343 | 0.451306  |
| H | -0.338374 | -1.300228 | 0.986957  |
| H | -2.581419 | 2.152984  | 0.371394  |
| H | -2.509140 | 1.303988  | -1.164657 |
| H | -0.254183 | -2.139231 | -0.564508 |
| O | 1.313102  | 0.000252  | -0.850823 |
| C | 2.103086  | 0.000352  | 0.226411  |
| O | 1.706654  | 0.000873  | 1.366044  |
| C | 3.550431  | -0.000531 | -0.170693 |
| H | 3.763431  | -0.883155 | -0.772828 |
| H | 3.762925  | 0.877144  | -0.780204 |
| H | 4.173902  | 0.003110  | 0.717391  |
| H | -0.254791 | 2.139101  | -0.565357 |
| H | -0.338646 | 1.300659  | 0.986438  |

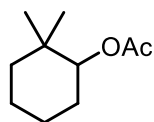

2,2-dimethylcyclohexyl acetate

| Conformation | Electronic Energy | Enthalpy    | Gibbs Free Energy |
|--------------|-------------------|-------------|-------------------|
| ax           | -542.332275       | -542.048704 | -542.102007       |
| ax2          | -542.332109       | -542.048489 | -542.100745       |
| ax3          | -542.320019       | -542.0362   | -542.088341       |
| eq           | -542.333115       | -542.049649 | -542.102294       |
| eq2          | -542.332901       | -542.049305 | -542.101436       |
| eq3          | -542.325672       | -542.042075 | -542.094026       |

ax

|   |           |           |           |
|---|-----------|-----------|-----------|
| C | 1.172937  | -0.874990 | 0.005139  |
| C | -0.019671 | -0.138845 | 0.635408  |
| H | -0.376381 | -0.702880 | 1.497076  |
| C | 2.224316  | -1.119241 | 1.094014  |
| C | 0.721688  | -2.234277 | -0.531547 |
| C | 0.293328  | 1.300285  | 1.031707  |
| C | 0.872938  | 2.096992  | -0.137776 |
| H | 0.110198  | 2.204164  | -0.913625 |
| H | 1.130265  | 3.103073  | 0.195875  |
| C | 1.759300  | -0.034025 | -1.142174 |
| C | 2.096672  | 1.399730  | -0.730803 |
| H | 2.907112  | 1.399643  | 0.002373  |
| H | 2.459318  | 1.953376  | -1.598351 |
| H | 1.804772  | -1.722134 | 1.902057  |

|   |           |           |           |
|---|-----------|-----------|-----------|
| H | 2.608521  | -0.198054 | 1.528286  |
| H | 0.008686  | -2.125574 | -1.347802 |
| H | 0.252037  | -2.826850 | 0.257209  |
| H | 1.002990  | 1.284502  | 1.860921  |
| H | 2.646921  | -0.540849 | -1.528880 |
| H | 1.029802  | -0.003622 | -1.956711 |
| H | -0.619515 | 1.766103  | 1.404539  |
| O | -1.081467 | -0.121293 | -0.350053 |
| H | 1.583330  | -2.791379 | -0.904014 |
| H | 3.068618  | -1.665876 | 0.670465  |
| C | -2.339940 | -0.049629 | 0.092552  |
| O | -2.640295 | -0.017774 | 1.261338  |
| C | -3.316297 | -0.014949 | -1.044858 |
| H | -3.147684 | 0.886041  | -1.634683 |
| H | -3.155894 | -0.873702 | -1.695371 |
| H | -4.330628 | -0.019760 | -0.659620 |

ax2

```
=====
```

|   |           |           |           |
|---|-----------|-----------|-----------|
| C | 0.831617  | 0.963909  | 0.107072  |
| C | 0.025510  | -0.037585 | -0.741493 |
| H | -0.430215 | 0.484462  | -1.580661 |
| C | 1.819790  | 1.695826  | -0.808520 |
| C | -0.102875 | 2.005873  | 0.724190  |
| C | 0.853186  | -1.218902 | -1.232126 |
| C | 1.569307  | -1.932623 | -0.085760 |
| H | 0.827559  | -2.392395 | 0.572172  |
| H | 2.187292  | -2.738816 | -0.483167 |
| C | 1.573740  | 0.215092  | 1.227745  |
| C | 2.420322  | -0.954026 | 0.722834  |
| H | 3.238933  | -0.583416 | 0.100787  |
| H | 2.878295  | -1.466509 | 1.570359  |
| H | 1.287444  | 2.216306  | -1.607423 |
| H | 2.545794  | 1.028055  | -1.268973 |
| H | -0.824337 | 1.549030  | 1.403302  |
| H | -0.652507 | 2.546734  | -0.047992 |
| H | 1.584215  | -0.850588 | -1.954206 |
| H | 2.194995  | 0.930285  | 1.772632  |
| H | 0.833358  | -0.167410 | 1.936587  |
| H | 0.195005  | -1.905336 | -1.766850 |
| O | -1.037944 | -0.596139 | 0.068349  |
| H | 0.479966  | 2.729388  | 1.297335  |
| H | 2.370895  | 2.440878  | -0.231917 |
| C | -2.289198 | -0.159652 | -0.112305 |
| O | -2.613796 | 0.646503  | -0.948996 |
| C | -3.228467 | -0.802050 | 0.864599  |
| H | -3.132322 | -1.885571 | 0.815319  |
| H | -2.959461 | -0.489553 | 1.874020  |
| H | -4.248593 | -0.503632 | 0.646436  |

ax3

```
=====
```

|   |          |           |           |
|---|----------|-----------|-----------|
| C | 0.929966 | -0.952450 | -0.070129 |
| C | 0.096107 | -0.210979 | 1.005819  |

|   |           |           |           |
|---|-----------|-----------|-----------|
| H | 0.218833  | -0.776100 | 1.929025  |
| C | 2.175417  | -1.489911 | 0.655357  |
| C | 0.151080  | -2.143842 | -0.626079 |
| C | 0.551439  | 1.223910  | 1.297152  |
| C | 1.012836  | 2.058002  | 0.100900  |
| H | 0.159388  | 2.355716  | -0.504185 |
| H | 1.485698  | 2.967850  | 0.475620  |
| C | 1.378475  | -0.044053 | -1.230571 |
| C | 1.995866  | 1.274036  | -0.765777 |
| H | 2.911054  | 1.080891  | -0.198995 |
| H | 2.285513  | 1.868359  | -1.634029 |
| H | 1.892684  | -2.244455 | 1.391334  |
| H | 2.720188  | -0.702294 | 1.176670  |
| H | -0.708817 | -1.823621 | -1.216198 |
| H | -0.205891 | -2.792695 | 0.176006  |
| H | 1.392764  | 1.136184  | 1.989500  |
| H | 2.099317  | -0.604908 | -1.831365 |
| H | 0.522686  | 0.173533  | -1.867866 |
| H | -0.244087 | 1.729457  | 1.847440  |
| O | -1.348113 | -0.336794 | 0.853224  |
| H | 0.800355  | -2.733815 | -1.275931 |
| H | 2.855677  | -1.951518 | -0.062030 |
| C | -2.035184 | 0.207199  | -0.147753 |
| O | -1.555513 | 0.875791  | -1.029512 |
| C | -3.493072 | -0.137548 | -0.043314 |
| H | -3.613029 | -1.214410 | -0.165865 |
| H | -3.870941 | 0.129451  | 0.942267  |
| H | -4.049962 | 0.384212  | -0.814720 |

eq

```
=====
```

|   |           |           |           |
|---|-----------|-----------|-----------|
| C | -0.956326 | 0.954550  | -0.099124 |
| C | 0.049365  | -0.201404 | -0.191514 |
| H | 0.198922  | -0.440523 | -1.246090 |
| C | -1.088983 | 1.481658  | 1.333008  |
| C | -0.497176 | 2.098039  | -1.005146 |
| C | -0.386161 | -1.458742 | 0.546215  |
| C | -1.734722 | -1.943984 | 0.015424  |
| H | -1.619669 | -2.244052 | -1.030581 |
| H | -2.055180 | -2.828043 | 0.567661  |
| C | -2.307498 | 0.421797  | -0.612856 |
| C | -2.786003 | -0.839142 | 0.106192  |
| H | -2.992521 | -0.617719 | 1.156130  |
| H | -3.725273 | -1.176904 | -0.334534 |
| H | -0.139215 | 1.884559  | 1.685209  |
| H | -1.410179 | 0.714411  | 2.035998  |
| H | -0.378166 | 1.755162  | -2.035082 |
| H | 0.454995  | 2.510052  | -0.668699 |
| H | -0.458279 | -1.243609 | 1.614647  |
| H | -3.048863 | 1.219578  | -0.525707 |
| H | -2.205788 | 0.197918  | -1.679971 |
| H | 0.378204  | -2.225740 | 0.417099  |
| O | 1.310017  | 0.261504  | 0.340501  |
| H | -1.234433 | 2.903130  | -0.999081 |

|   |           |           |           |
|---|-----------|-----------|-----------|
| H | -1.826456 | 2.286185  | 1.357953  |
| C | 2.429509  | -0.291108 | -0.137975 |
| O | 2.445282  | -1.143882 | -0.991847 |
| C | 3.646591  | 0.288092  | 0.518574  |
| H | 3.661884  | 1.367607  | 0.372569  |
| H | 3.605725  | 0.097330  | 1.590653  |
| H | 4.540332  | -0.158856 | 0.095809  |

eq2

```
=====
```

|   |           |           |           |
|---|-----------|-----------|-----------|
| C | -0.719205 | 0.926281  | 0.026715  |
| C | -0.022776 | -0.434159 | -0.140682 |
| H | 0.149683  | -0.601569 | -1.203905 |
| C | -0.836269 | 1.324642  | 1.501130  |
| C | 0.080622  | 2.002476  | -0.709084 |
| C | -0.811178 | -1.602896 | 0.427753  |
| C | -2.192881 | -1.675521 | -0.222220 |
| H | -2.074293 | -1.897043 | -1.287179 |
| H | -2.764799 | -2.495695 | 0.212988  |
| C | -2.112359 | 0.805656  | -0.619117 |
| C | -2.942683 | -0.353201 | -0.068731 |
| H | -3.171692 | -0.183497 | 0.986098  |
| H | -3.897782 | -0.401192 | -0.594090 |
| H | 0.151252  | 1.439424  | 1.948955  |
| H | -1.390550 | 0.597129  | 2.092208  |
| H | 0.196339  | 1.752958  | -1.765078 |
| H | 1.075483  | 2.124701  | -0.275824 |
| H | -0.909349 | -1.489154 | 1.509504  |
| H | -2.638853 | 1.753921  | -0.487300 |
| H | -1.981345 | 0.661933  | -1.696823 |
| H | -0.252422 | -2.522528 | 0.247190  |
| O | 1.259307  | -0.405968 | 0.524002  |
| H | -0.432627 | 2.963542  | -0.638638 |
| H | -1.355024 | 2.282044  | 1.579419  |
| C | 2.374316  | -0.329705 | -0.212360 |
| O | 2.393509  | -0.329472 | -1.418408 |
| C | 3.589281  | -0.240524 | 0.662061  |
| H | 3.544729  | 0.683217  | 1.239457  |
| H | 3.601973  | -1.072316 | 1.364863  |
| H | 4.485545  | -0.250642 | 0.050620  |

eq3

```
=====
```

|   |           |           |           |
|---|-----------|-----------|-----------|
| C | -0.774179 | 0.971501  | 0.040282  |
| C | -0.074407 | -0.180120 | -0.701931 |
| H | -0.380424 | -0.098924 | -1.748024 |
| C | -0.388386 | 1.055009  | 1.519543  |
| C | -0.423076 | 2.300156  | -0.632125 |
| C | -0.476144 | -1.572108 | -0.229353 |
| C | -1.983164 | -1.744281 | -0.425537 |
| H | -2.225808 | -1.678008 | -1.490513 |
| H | -2.287426 | -2.735500 | -0.087503 |
| C | -2.290580 | 0.730254  | -0.111924 |
| C | -2.745014 | -0.658862 | 0.333521  |

|   |           |           |           |
|---|-----------|-----------|-----------|
| H | -2.576867 | -0.782041 | 1.406557  |
| H | -3.818454 | -0.762928 | 0.167573  |
| H | 0.661353  | 1.324670  | 1.634591  |
| H | -0.550197 | 0.118636  | 2.050501  |
| H | -0.663329 | 2.275652  | -1.697144 |
| H | 0.637489  | 2.530269  | -0.526105 |
| H | -0.226942 | -1.715721 | 0.818448  |
| H | -2.819431 | 1.506308  | 0.446114  |
| H | -2.554488 | 0.861543  | -1.166492 |
| H | 0.078911  | -2.315138 | -0.805423 |
| O | 1.357387  | 0.035009  | -0.808733 |
| H | -0.992307 | 3.111828  | -0.174808 |
| H | -0.987726 | 1.829957  | 2.002251  |
| C | 2.234926  | -0.353076 | 0.120535  |
| O | 1.956590  | -0.904109 | 1.156011  |
| C | 3.633839  | -0.007989 | -0.304969 |
| H | 3.868381  | -0.520584 | -1.237440 |
| H | 3.707072  | 1.063708  | -0.487094 |
| H | 4.335481  | -0.303839 | 0.468033  |

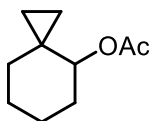

spiro[2.5]octan-4-yl acetate

| Conformation | Electronic Energy | Enthalpy    | Gibbs Free Energy |
|--------------|-------------------|-------------|-------------------|
| ax           | -541.101469       | -540.841047 | -540.891543       |
| ax2          | -541.100662       | -540.840294 | -540.891807       |
| ax3          | -541.089474       | -540.82871  | -540.879811       |
| eq           | -541.100405       | -540.840034 | -540.890852       |
| eq2          | -541.100513       | -540.840117 | -540.890322       |
| eq3          | -541.092173       | -540.83174  | -540.882344       |

ax

|   |           |           |           |
|---|-----------|-----------|-----------|
| C | 1.204212  | -0.741685 | -0.110568 |
| C | -0.026662 | -0.217212 | 0.582676  |
| H | -0.348961 | -0.912687 | 1.356228  |
| C | 2.138066  | -1.554281 | 0.739077  |
| C | 1.305362  | -2.218869 | -0.328534 |
| C | 0.212311  | 1.169505  | 1.169874  |
| C | 0.787045  | 2.135908  | 0.133119  |
| H | 0.045210  | 2.310020  | -0.651065 |
| H | 0.984445  | 3.099757  | 0.603738  |
| C | 1.800633  | 0.209468  | -1.127037 |
| C | 2.063666  | 1.577550  | -0.496436 |
| H | 2.831846  | 1.475379  | 0.276327  |

|   |           |           |           |
|---|-----------|-----------|-----------|
| H | 2.450298  | 2.269267  | -1.246186 |
| H | 1.865887  | -1.731832 | 1.770232  |
| H | 3.197224  | -1.440799 | 0.555073  |
| H | 1.810422  | -2.555622 | -1.222979 |
| H | 0.475976  | -2.833466 | -0.006742 |
| H | 0.919102  | 1.054788  | 1.995987  |
| H | 2.721346  | -0.219334 | -1.526274 |
| H | 1.106579  | 0.324726  | -1.964786 |
| H | -0.718892 | 1.550805  | 1.589047  |
| O | -1.073734 | -0.148811 | -0.419173 |
| C | -2.338799 | -0.160608 | 0.011529  |
| O | -2.648738 | -0.248189 | 1.174925  |
| C | -3.306284 | -0.055656 | -1.128940 |
| H | -3.147838 | 0.888345  | -1.650054 |
| H | -3.126811 | -0.862082 | -1.838779 |
| H | -4.323357 | -0.105985 | -0.754342 |

ax2

```
=====
```

|   |           |           |           |
|---|-----------|-----------|-----------|
| C | 0.806347  | 0.862277  | 0.144689  |
| C | 0.013564  | -0.054000 | -0.756120 |
| H | -0.443775 | 0.512868  | -1.564349 |
| C | 1.462736  | 2.037015  | -0.521104 |
| C | 0.284224  | 2.243742  | 0.397428  |
| C | 0.882449  | -1.177145 | -1.306110 |
| C | 1.634026  | -1.919218 | -0.200242 |
| H | 0.916909  | -2.439579 | 0.439807  |
| H | 2.277526  | -2.680151 | -0.643422 |
| C | 1.568411  | 0.143214  | 1.238596  |
| C | 2.458733  | -0.951560 | 0.649216  |
| H | 3.229527  | -0.489801 | 0.024436  |
| H | 2.970897  | -1.490497 | 1.447542  |
| H | 1.300537  | 2.178128  | -1.580784 |
| H | 2.441173  | 2.325048  | -0.162898 |
| H | 0.477577  | 2.673558  | 1.370454  |
| H | -0.658648 | 2.515202  | -0.053675 |
| H | 1.599949  | -0.724107 | -1.994967 |
| H | 2.161349  | 0.866957  | 1.800476  |
| H | 0.857980  | -0.306438 | 1.938830  |
| H | 0.260674  | -1.860924 | -1.885356 |
| O | -1.046057 | -0.682897 | 0.010055  |
| C | -2.266058 | -0.135320 | -0.018180 |
| O | -2.556711 | 0.838000  | -0.669323 |
| C | -3.218871 | -0.893844 | 0.856787  |
| H | -3.235885 | -1.941937 | 0.561175  |
| H | -2.874410 | -0.844616 | 1.889637  |
| H | -4.212597 | -0.465501 | 0.777477  |

ax3

```
=====
```

|   |          |           |           |
|---|----------|-----------|-----------|
| C | 0.947790 | -0.820678 | -0.085584 |
| C | 0.072875 | -0.223620 | 1.001510  |
| H | 0.201361 | -0.831594 | 1.894274  |
| C | 1.948157 | -1.840035 | 0.408205  |

|   |           |           |           |
|---|-----------|-----------|-----------|
| C | 0.746534  | -2.275533 | -0.384383 |
| C | 0.452941  | 1.215159  | 1.367681  |
| C | 0.936297  | 2.106333  | 0.221430  |
| H | 0.101228  | 2.391224  | -0.415556 |
| H | 1.352557  | 3.020517  | 0.648463  |
| C | 1.433626  | 0.092434  | -1.196830 |
| C | 1.992379  | 1.393188  | -0.621801 |
| H | 2.864665  | 1.168114  | 0.000910  |
| H | 2.332847  | 2.043714  | -1.428783 |
| H | 1.964570  | -2.071953 | 1.463507  |
| H | 2.910619  | -1.857133 | -0.083017 |
| H | 0.902571  | -2.594392 | -1.405510 |
| H | -0.042576 | -2.792073 | 0.143842  |
| H | 1.270560  | 1.126918  | 2.088601  |
| H | 2.202912  | -0.435269 | -1.764088 |
| H | 0.617350  | 0.321750  | -1.879873 |
| H | -0.382249 | 1.672435  | 1.900470  |
| O | -1.360417 | -0.414278 | 0.796054  |
| C | -2.020690 | 0.110449  | -0.233066 |
| O | -1.525033 | 0.810481  | -1.081001 |
| C | -3.468999 | -0.285136 | -0.199664 |
| H | -3.550384 | -1.369937 | -0.262544 |
| H | -3.913822 | 0.027672  | 0.744227  |
| H | -3.994072 | 0.175012  | -1.030332 |

eq

```
=====
```

|   |           |           |           |
|---|-----------|-----------|-----------|
| C | -0.999373 | 0.862870  | -0.222243 |
| C | 0.039306  | -0.238494 | -0.236037 |
| H | 0.186047  | -0.578628 | -1.263030 |
| C | -0.961549 | 1.891493  | 0.868132  |
| C | -0.608335 | 2.267524  | -0.553222 |
| C | -0.394807 | -1.408498 | 0.636285  |
| C | -1.756262 | -1.936804 | 0.182346  |
| H | -1.665084 | -2.340215 | -0.830678 |
| H | -2.064719 | -2.760570 | 0.826786  |
| C | -2.354152 | 0.352379  | -0.671208 |
| C | -2.807784 | -0.827401 | 0.188989  |
| H | -2.963130 | -0.483551 | 1.215862  |
| H | -3.763682 | -1.209677 | -0.171783 |
| H | -0.151456 | 1.850405  | 1.581510  |
| H | -1.909441 | 2.233498  | 1.259857  |
| H | -1.319909 | 2.861002  | -1.110148 |
| H | 0.431781  | 2.470126  | -0.763983 |
| H | -0.458016 | -1.057861 | 1.670320  |
| H | -3.077654 | 1.167941  | -0.626492 |
| H | -2.289783 | 0.032872  | -1.716681 |
| H | 0.360346  | -2.193651 | 0.592975  |
| O | 1.286346  | 0.297018  | 0.242406  |
| C | 2.414582  | -0.303186 | -0.158348 |
| O | 2.438810  | -1.250764 | -0.903816 |
| C | 3.621475  | 0.353908  | 0.439300  |
| H | 3.610687  | 1.419667  | 0.215080  |
| H | 3.591873  | 0.240353  | 1.522964  |

H 4.522276 -0.104495 0.044765

eq2

```
=====
C 0.714700 0.842211 0.103238
C 0.053500 -0.522079 0.140688
H -0.088390 -0.824182 1.178634
C 0.516526 1.707753 -1.106051
C -0.103298 2.088689 0.217927
C 0.905159 -1.552334 -0.583346
C 2.304270 -1.609072 0.032675
H 2.225815 -1.961459 1.065563
H 2.913594 -2.335158 -0.506306
C 2.096992 0.802746 0.723532
C 2.974031 -0.234764 0.021532
H 3.138544 0.078256 -1.013680
H 3.951899 -0.288093 0.502080
H -0.152369 1.357380 -1.878989
H 1.365927 2.280936 -1.450812
H 0.331075 2.916908 0.760238
H -1.176764 1.998904 0.306845
H 0.972469 -1.271424 -1.638024
H 2.547095 1.795146 0.666332
H 2.009940 0.546044 1.784450
H 0.418133 -2.526789 -0.527520
O -1.233179 -0.486406 -0.501671
C -2.327148 -0.356415 0.263314
O -2.304763 -0.301715 1.467271
C -3.564555 -0.281740 -0.578726
H -3.527172 0.625458 -1.182657
H -3.604189 -1.132409 -1.257293
H -4.443139 -0.264509 0.057645
```

eq3

```
=====
C -0.814702 0.919137 -0.157926
C -0.102208 -0.299931 -0.712010
H -0.394416 -0.387974 -1.761820
C -0.263565 1.668591 1.017870
C -0.240290 2.285957 -0.361235
C -0.539394 -1.581849 -0.011735
C -2.052282 -1.743827 -0.178374
H -2.298972 -1.840847 -1.239990
H -2.375951 -2.662589 0.311703
C -2.320525 0.755933 -0.259026
C -2.790620 -0.538398 0.404502
H -2.596414 -0.484202 1.479758
H -3.867793 -0.653661 0.275960
H 0.678555 1.353415 1.438729
H -0.977081 2.057157 1.731458
H -0.934495 3.088248 -0.569245
H 0.721152 2.366349 -0.847487
H -0.296997 -1.534286 1.046999
H -2.805299 1.623630 0.191147
```



|   |           |           |           |
|---|-----------|-----------|-----------|
| H | -2.604669 | 0.738955  | -1.316560 |
| H | -0.005854 | -2.430950 | -0.442935 |
| O | 1.327108  | -0.107031 | -0.823896 |
| C | 2.198169  | -0.373071 | 0.156355  |
| O | 1.908468  | -0.758565 | 1.260735  |
| C | 3.601632  | -0.117967 | -0.312213 |
| H | 3.821051  | -0.750050 | -1.171961 |
| H | 3.695739  | 0.920153  | -0.629776 |
| H | 4.299551  | -0.326032 | 0.492060  |

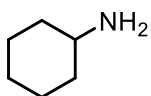

cyclohexanamine

| Conformation | Electronic Energy | Enthalpy    | Gibbs Free Energy |
|--------------|-------------------|-------------|-------------------|
| ax           | -291.187901       | -290.991647 | -291.029768       |
| ax2          | -291.188025       | -290.991689 | -291.029826       |
| eq           | -291.190040       | -290.993874 | -291.032066       |
| eq2          | -291.189840       | -290.993727 | -291.032056       |

ax

|   |           |           |           |
|---|-----------|-----------|-----------|
| C | 0.277597  | -1.259473 | 0.604168  |
| C | 1.135141  | -0.000015 | 0.458684  |
| H | 1.874583  | -0.000047 | 1.267608  |
| C | 0.277625  | 1.259465  | 0.604162  |
| C | -0.937104 | 1.258284  | -0.324841 |
| H | -1.537907 | 2.151432  | -0.144316 |
| H | -0.604464 | 1.301854  | -1.364545 |
| C | -0.937126 | -1.258274 | -0.324847 |
| C | -1.780167 | 0.000012  | -0.119555 |
| H | -2.634045 | 0.000022  | -0.799364 |
| H | -2.182045 | 0.000012  | 0.899255  |
| H | -0.065458 | 1.319565  | 1.641013  |
| H | -0.604488 | -1.301851 | -1.364551 |
| H | -1.537939 | -2.151414 | -0.144309 |
| H | 0.898289  | 2.140742  | 0.422831  |
| H | 0.898258  | -2.140756 | 0.422856  |
| H | -0.065485 | -1.319503 | 1.641018  |
| N | 1.792569  | 0.000001  | -0.857579 |
| H | 2.398509  | 0.810987  | -0.930476 |
| H | 2.398419  | -0.811044 | -0.930585 |

ax2

|   |          |           |          |
|---|----------|-----------|----------|
| C | 0.244971 | -1.275554 | 0.614654 |
|---|----------|-----------|----------|

|   |           |           |           |
|---|-----------|-----------|-----------|
| C | 1.149912  | -0.051828 | 0.452331  |
| H | 1.915969  | -0.085132 | 1.229330  |
| C | 0.332968  | 1.236118  | 0.633922  |
| C | -0.877133 | 1.289492  | -0.299911 |
| H | -1.448321 | 2.200680  | -0.115351 |
| H | -0.540083 | 1.338955  | -1.339916 |
| C | -0.965279 | -1.229150 | -0.320958 |
| C | -1.764835 | 0.057963  | -0.116764 |
| H | -2.610576 | 0.093086  | -0.805604 |
| H | -2.176898 | 0.063246  | 0.897616  |
| H | -0.015404 | 1.283767  | 1.670376  |
| H | -0.636430 | -1.289694 | -1.363064 |
| H | -1.597908 | -2.100904 | -0.146311 |
| H | 0.981141  | 2.100611  | 0.472424  |
| H | 0.828844  | -2.181805 | 0.445206  |
| H | -0.111778 | -1.304533 | 1.647894  |
| N | 1.862403  | -0.127082 | -0.833484 |
| H | 1.199919  | -0.084576 | -1.600951 |
| H | 2.451083  | 0.693620  | -0.936909 |

eq

```
=====
```

|   |           |           |           |
|---|-----------|-----------|-----------|
| C | -0.307334 | -1.252566 | -0.194649 |
| C | -1.018668 | 0.000009  | 0.306582  |
| H | -0.962185 | -0.000027 | 1.404282  |
| C | -0.307201 | 1.252612  | -0.194557 |
| C | 1.163882  | 1.260280  | 0.219836  |
| H | 1.657504  | 2.151969  | -0.169573 |
| H | 1.231544  | 1.310014  | 1.311002  |
| C | 1.163737  | -1.260321 | 0.219920  |
| C | 1.877768  | -0.000077 | -0.269277 |
| H | 2.916660  | -0.000119 | 0.064868  |
| H | 1.892694  | -0.000137 | -1.363732 |
| H | -0.383269 | 1.276146  | -1.286520 |
| H | 1.231247  | -1.309886 | 1.311114  |
| H | 1.657340  | -2.152101 | -0.169272 |
| H | -0.818264 | 2.141156  | 0.184699  |
| H | -0.818460 | -2.141170 | 0.184379  |
| H | -0.383229 | -1.275958 | -1.286633 |
| N | -2.409634 | 0.000030  | -0.161875 |
| H | -2.893707 | -0.810897 | 0.210838  |
| H | -2.893544 | 0.811184  | 0.210538  |

eq2

```
=====
```

|   |           |           |           |
|---|-----------|-----------|-----------|
| C | -0.329526 | 1.242136  | 0.177078  |
| C | -1.023852 | -0.020792 | -0.338230 |
| H | -0.978222 | -0.012601 | -1.432317 |
| C | -0.295249 | -1.266170 | 0.157488  |
| C | 1.186581  | -1.243118 | -0.216638 |
| H | 1.684689  | -2.130436 | 0.177274  |
| H | 1.280585  | -1.283078 | -1.306358 |
| C | 1.149937  | 1.273738  | -0.207023 |
| C | 1.870585  | 0.023771  | 0.296236  |

|   |           |           |           |
|---|-----------|-----------|-----------|
| H | 2.917327  | 0.039213  | -0.012106 |
| H | 1.858745  | 0.020178  | 1.390821  |
| H | -0.395517 | -1.310295 | 1.248364  |
| H | 1.237081  | 1.322837  | -1.297041 |
| H | 1.622918  | 2.173426  | 0.189987  |
| H | -0.781478 | -2.155833 | -0.246765 |
| H | -0.846900 | 2.124020  | -0.208353 |
| H | -0.424396 | 1.262413  | 1.268778  |
| N | -2.441704 | -0.105074 | 0.033926  |
| H | -2.512377 | -0.108098 | 1.048191  |
| H | -2.921382 | 0.736374  | -0.271427 |

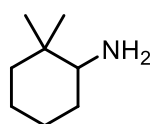

2,2-dimethylcyclohexan-1-amine

| Conformation | Electronic Energy | Enthalpy    | Gibbs Free Energy |
|--------------|-------------------|-------------|-------------------|
| ax           | -369.802433       | -369.547346 | -369.59069        |
| ax2          | -369.802471       | -369.547233 | -369.590521       |
| ax3          | -369.801475       | -369.546479 | -369.590244       |
| eq           | -369.803758       | -369.548844 | -369.592656       |
| eq2          | -369.804163       | -369.549197 | -369.592894       |
| eq3          | -369.803628       | -369.548776 | -369.592573       |

ax

|   |           |           |           |
|---|-----------|-----------|-----------|
| C | 1.320959  | 0.682734  | 0.926673  |
| C | -0.116974 | 0.999216  | 0.502481  |
| H | -0.649377 | 1.397984  | 1.376161  |
| C | -0.880690 | -0.271158 | 0.054203  |
| C | -0.064075 | -1.040765 | -0.998649 |
| H | -0.596254 | -1.962595 | -1.249104 |
| H | -0.020704 | -0.440631 | -1.911421 |
| C | 2.097485  | -0.074870 | -0.150823 |
| C | 1.363955  | -1.354033 | -0.551263 |
| H | 1.898993  | -1.859413 | -1.357313 |
| H | 1.348952  | -2.044746 | 0.296136  |
| H | 2.216697  | 0.560943  | -1.031223 |
| H | 3.099572  | -0.308341 | 0.213155  |
| H | 1.826904  | 1.620007  | 1.172312  |
| H | 1.302486  | 0.090319  | 1.843432  |
| N | -0.073192 | 1.993867  | -0.582349 |
| H | -0.998709 | 2.375995  | -0.740006 |
| H | 0.501273  | 2.775600  | -0.284214 |
| C | -1.148245 | -1.156361 | 1.277288  |

|   |           |           |           |
|---|-----------|-----------|-----------|
| H | -1.761323 | -0.623336 | 2.007420  |
| H | -1.691635 | -2.054484 | 0.976784  |
| H | -0.234959 | -1.473730 | 1.778097  |
| C | -2.235248 | 0.112507  | -0.546546 |
| H | -2.819471 | -0.785160 | -0.758996 |
| H | -2.811390 | 0.730312  | 0.147517  |
| H | -2.121705 | 0.660595  | -1.482479 |

ax2

```
=====
```

|   |           |           |           |
|---|-----------|-----------|-----------|
| C | 1.305538  | 0.668569  | 0.971198  |
| C | -0.122953 | 1.000961  | 0.525682  |
| H | -0.669963 | 1.401125  | 1.384083  |
| C | -0.879854 | -0.273021 | 0.053032  |
| C | -0.051940 | -1.007094 | -1.016978 |
| H | -0.572982 | -1.926743 | -1.296538 |
| H | -0.014271 | -0.387170 | -1.919075 |
| C | 2.096409  | -0.042203 | -0.128323 |
| C | 1.379901  | -1.315576 | -0.576953 |
| H | 1.923184  | -1.786570 | -1.398055 |
| H | 1.371241  | -2.034010 | 0.246806  |
| H | 2.219721  | 0.625126  | -0.987038 |
| H | 3.100387  | -0.275705 | 0.229588  |
| H | 1.802874  | 1.595137  | 1.261416  |
| H | 1.274014  | 0.030524  | 1.856124  |
| N | -0.064053 | 2.088350  | -0.463505 |
| H | 0.330462  | 1.749571  | -1.335134 |
| H | -1.001951 | 2.400482  | -0.687327 |
| C | -1.136950 | -1.189005 | 1.255962  |
| H | -1.736674 | -0.669522 | 2.007036  |
| H | -1.691402 | -2.075456 | 0.940936  |
| H | -0.220514 | -1.525896 | 1.737053  |
| C | -2.239277 | 0.104344  | -0.538886 |
| H | -2.814089 | -0.796268 | -0.763922 |
| H | -2.819970 | 0.705366  | 0.165973  |
| H | -2.136939 | 0.669705  | -1.465795 |

ax3

```
=====
```

|   |           |           |           |
|---|-----------|-----------|-----------|
| C | 1.323395  | 0.631404  | 0.958261  |
| C | -0.096773 | 1.010526  | 0.505828  |
| H | -0.626623 | 1.442032  | 1.359970  |
| C | -0.899744 | -0.233158 | 0.051083  |
| C | -0.099489 | -1.017099 | -1.006340 |
| H | -0.659957 | -1.917403 | -1.272059 |
| H | -0.032167 | -0.416079 | -1.919339 |
| C | 2.086631  | -0.136743 | -0.121337 |
| C | 1.314863  | -1.383060 | -0.553898 |
| H | 1.840341  | -1.890325 | -1.364914 |
| H | 1.269287  | -2.088551 | 0.279639  |
| H | 2.243690  | 0.507862  | -0.991503 |
| H | 3.077080  | -0.409516 | 0.246292  |
| H | 1.857734  | 1.546592  | 1.224106  |
| H | 1.272233  | 0.024147  | 1.864837  |

|   |           |           |           |
|---|-----------|-----------|-----------|
| N | -0.094383 | 2.046140  | -0.541775 |
| H | 0.487810  | 2.818227  | -0.232707 |
| H | 0.354154  | 1.689154  | -1.379614 |
| C | -1.186988 | -1.124130 | 1.266317  |
| H | -1.786299 | -0.581325 | 2.000668  |
| H | -1.753482 | -2.004777 | 0.956835  |
| H | -0.283555 | -1.470669 | 1.764741  |
| C | -2.246069 | 0.182316  | -0.544986 |
| H | -2.850360 | -0.703311 | -0.753496 |
| H | -2.801400 | 0.813484  | 0.153076  |
| H | -2.122751 | 0.737156  | -1.473673 |

eq

```
=====
```

|   |           |           |           |
|---|-----------|-----------|-----------|
| C | 0.655077  | -0.554579 | -0.009398 |
| C | 0.351714  | 0.915418  | -0.379956 |
| H | 0.249171  | 0.931789  | -1.475246 |
| C | -0.974537 | 1.401604  | 0.199628  |
| C | -2.138905 | 0.518597  | -0.243326 |
| H | -3.068379 | 0.865393  | 0.210809  |
| H | -2.261926 | 0.604933  | -1.327414 |
| C | -0.542823 | -1.411514 | -0.459373 |
| C | -1.880309 | -0.944454 | 0.112946  |
| H | -2.684964 | -1.573954 | -0.271189 |
| H | -1.882702 | -1.060451 | 1.199752  |
| H | -0.908599 | 1.416741  | 1.290671  |
| H | -0.599477 | -1.378747 | -1.552890 |
| H | -0.352167 | -2.452127 | -0.184553 |
| H | -1.138928 | 2.433578  | -0.121208 |
| N | 1.424701  | 1.814934  | 0.063905  |
| H | 2.283233  | 1.608230  | -0.435107 |
| H | 1.180577  | 2.766765  | -0.190258 |
| C | 1.898301  | -1.028240 | -0.767196 |
| H | 1.784157  | -0.871771 | -1.842397 |
| H | 2.797425  | -0.504291 | -0.437653 |
| H | 2.061557  | -2.094670 | -0.597115 |
| C | 0.904891  | -0.734395 | 1.491374  |
| H | 1.065182  | -1.792160 | 1.711886  |
| H | 1.792906  | -0.186825 | 1.805597  |
| H | 0.069569  | -0.391597 | 2.100783  |

eq2

```
=====
```

|   |           |           |           |
|---|-----------|-----------|-----------|
| C | 0.653629  | -0.550166 | -0.015725 |
| C | 0.350697  | 0.918421  | -0.420208 |
| H | 0.267758  | 0.922363  | -1.513089 |
| C | -0.980994 | 1.413588  | 0.142868  |
| C | -2.146099 | 0.507163  | -0.246618 |
| H | -3.071419 | 0.870419  | 0.203389  |
| H | -2.281547 | 0.548371  | -1.332013 |
| C | -0.551532 | -1.420812 | -0.416962 |
| C | -1.878539 | -0.938836 | 0.164495  |
| H | -2.688246 | -1.585253 | -0.178741 |
| H | -1.858906 | -1.011439 | 1.255032  |

|   |           |           |           |
|---|-----------|-----------|-----------|
| H | -0.909159 | 1.475118  | 1.233495  |
| H | -0.628507 | -1.417300 | -1.509944 |
| H | -0.354620 | -2.453935 | -0.118688 |
| H | -1.150847 | 2.429271  | -0.218472 |
| N | 1.391442  | 1.892747  | -0.072718 |
| H | 1.478105  | 1.948271  | 0.937514  |
| H | 2.294460  | 1.584749  | -0.416525 |
| C | 1.880421  | -1.053383 | -0.779963 |
| H | 1.739304  | -0.948023 | -1.858067 |
| H | 2.785111  | -0.511077 | -0.499114 |
| H | 2.053366  | -2.110052 | -0.564596 |
| C | 0.930909  | -0.679376 | 1.485562  |
| H | 1.086428  | -1.729116 | 1.743587  |
| H | 1.835314  | -0.136246 | 1.764953  |
| H | 0.112363  | -0.304943 | 2.099611  |

eq3

```
=====
```

|   |           |           |           |
|---|-----------|-----------|-----------|
| C | 0.662847  | -0.554405 | -0.024645 |
| C | 0.356187  | 0.910725  | -0.414310 |
| H | 0.280341  | 0.928708  | -1.507063 |
| C | -0.981905 | 1.400780  | 0.150590  |
| C | -2.146997 | 0.496642  | -0.244573 |
| H | -3.075964 | 0.860305  | 0.197772  |
| H | -2.275558 | 0.531037  | -1.331182 |
| C | -0.548106 | -1.427017 | -0.405686 |
| C | -1.873864 | -0.944509 | 0.178436  |
| H | -2.682168 | -1.598141 | -0.154321 |
| H | -1.848361 | -1.005392 | 1.269706  |
| H | -0.910230 | 1.454362  | 1.241415  |
| H | -0.633268 | -1.434697 | -1.497944 |
| H | -0.346481 | -2.456489 | -0.098309 |
| H | -1.152274 | 2.420145  | -0.204046 |
| N | 1.473859  | 1.796949  | -0.057502 |
| H | 1.290142  | 2.720327  | -0.436860 |
| H | 1.490897  | 1.919365  | 0.951065  |
| C | 1.876629  | -1.058576 | -0.807934 |
| H | 1.712841  | -0.959552 | -1.883467 |
| H | 2.776821  | -0.502509 | -0.548799 |
| H | 2.054057  | -2.114308 | -0.590528 |
| C | 0.963769  | -0.683343 | 1.473100  |
| H | 1.123450  | -1.733087 | 1.728405  |
| H | 1.873209  | -0.140869 | 1.737174  |
| H | 0.154173  | -0.309626 | 2.099633  |

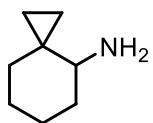

spiro[2.5]octan-4-amine

| Conformation | Electronic Energy | Enthalpy    | Gibbs Free Energy |
|--------------|-------------------|-------------|-------------------|
| ax           | -368.572634       | -368.340878 | -368.38288        |
| ax2          | -368.572914       | -368.341009 | -368.382958       |
| ax3          | -368.571943       | -368.340034 | -368.381978       |
| eq           | -368.572147       | -368.34033  | -368.382264       |
| eq2          | -368.572339       | -368.340575 | -368.382529       |
| eq3          | -368.572712       | -368.340824 | -368.382688       |

ax

```

=====
C  -0.827486   -0.152769   -0.050922
C  -0.029907   1.081455    0.326673
H  -0.607416   1.635351    1.076633
C  -1.770268  -0.695579    0.982105
C  -2.304692   0.007574   -0.243888
C   1.307419   0.674375    0.951179
C   2.083752  -0.316316    0.081515
H   2.377311   0.168301   -0.852415
H   3.002705  -0.609261    0.592021
C  -0.074879  -1.148378   -0.909385
C   1.238490  -1.550318   -0.236684
H   1.015801  -2.084246    0.692701
H   1.795510  -2.236946   -0.876284
H  -1.845258  -0.175987    1.927500
H  -1.889188  -1.768897    1.036191
H  -2.783663  -0.597304   -1.001368
H  -2.727749   0.993813   -0.106477
H   1.102500   0.215508    1.922503
H  -0.703668  -2.023195   -1.086349
H   0.140638  -0.700460   -1.883197
H   1.905065   1.569588    1.139635
N   0.209835   1.896802   -0.873452
H  -0.681948   2.188110   -1.261140
H   0.695933   2.747756   -0.609351

```

ax2

```

=====
C  -0.830239  -0.150886   -0.052146
C  -0.039387   1.092045    0.334501
H  -0.627935   1.653204    1.064282
C  -1.772356  -0.708941    0.973199
C  -2.306087  -0.003457   -0.252364
C   1.283493   0.677677    0.984050

```

|   |           |           |           |
|---|-----------|-----------|-----------|
| C | 2.080871  | -0.291359 | 0.107000  |
| H | 2.390750  | 0.206360  | -0.817153 |
| H | 2.996976  | -0.582161 | 0.623230  |
| C | -0.061677 | -1.130544 | -0.915037 |
| C | 1.251338  | -1.528882 | -0.239162 |
| H | 1.026993  | -2.078225 | 0.680505  |
| H | 1.820536  | -2.199784 | -0.884526 |
| H | -1.854738 | -0.192915 | 1.920257  |
| H | -1.885701 | -1.783214 | 1.023871  |
| H | -2.776799 | -0.609088 | -1.014606 |
| H | -2.738750 | 0.978587  | -0.113416 |
| H | 1.058398  | 0.186318  | 1.934425  |
| H | -0.680385 | -2.008152 | -1.111484 |
| H | 0.157075  | -0.671860 | -1.885261 |
| H | 1.871606  | 1.569307  | 1.206836  |
| N | 0.216622  | 2.004266  | -0.790278 |
| H | 0.757669  | 1.527851  | -1.504823 |
| H | -0.667796 | 2.239991  | -1.230445 |

ax3

```
=====
```

|   |           |           |           |
|---|-----------|-----------|-----------|
| C | -0.845438 | -0.114777 | -0.066907 |
| C | -0.011505 | 1.096321  | 0.310444  |
| H | -0.583724 | 1.694059  | 1.023366  |
| C | -1.798685 | -0.635178 | 0.969236  |
| C | -2.316011 | 0.072768  | -0.261206 |
| C | 1.287456  | 0.631236  | 0.986980  |
| C | 2.054648  | -0.376474 | 0.128467  |
| H | 2.391353  | 0.103950  | -0.795409 |
| H | 2.953357  | -0.701263 | 0.654826  |
| C | -0.109559 | -1.133451 | -0.914489 |
| C | 1.178953  | -1.580620 | -0.221393 |
| H | 0.920931  | -2.115430 | 0.697952  |
| H | 1.727393  | -2.278011 | -0.856572 |
| H | -1.861305 | -0.109122 | 1.912020  |
| H | -1.939452 | -1.705722 | 1.029843  |
| H | -2.806993 | -0.526412 | -1.015685 |
| H | -2.714188 | 1.070238  | -0.134778 |
| H | 1.032115  | 0.163328  | 1.942695  |
| H | -0.763112 | -1.986785 | -1.105298 |
| H | 0.134467  | -0.698680 | -1.889836 |
| H | 1.910226  | 1.500781  | 1.208525  |
| N | 0.205106  | 1.947823  | -0.870619 |
| H | 0.769600  | 2.747997  | -0.602166 |
| H | 0.754432  | 1.447372  | -1.561935 |

eq

```
=====
```

|   |           |           |           |
|---|-----------|-----------|-----------|
| C | -0.600247 | -0.502992 | -0.178626 |
| C | -0.274033 | 0.963348  | -0.436306 |
| H | -0.089064 | 1.066646  | -1.511012 |
| C | -1.450541 | -0.869033 | 1.004156  |
| C | -1.985828 | -1.021867 | -0.400989 |
| C | 1.011158  | 1.345001  | 0.308097  |



|   |           |           |           |
|---|-----------|-----------|-----------|
| C | 2.180367  | 0.423927  | -0.036906 |
| H | 2.424501  | 0.535093  | -1.098153 |
| H | 3.068119  | 0.716714  | 0.526029  |
| C | 0.555090  | -1.427824 | -0.511476 |
| C | 1.823707  | -1.034678 | 0.243463  |
| H | 1.658553  | -1.166105 | 1.317273  |
| H | 2.648718  | -1.690970 | -0.038465 |
| H | -1.872887 | -0.078719 | 1.608862  |
| H | -1.189626 | -1.767286 | 1.546980  |
| H | -2.080892 | -2.024462 | -0.795084 |
| H | -2.745532 | -0.321671 | -0.714137 |
| H | 0.807251  | 1.290681  | 1.383505  |
| H | 0.272416  | -2.457280 | -0.283208 |
| H | 0.750760  | -1.378745 | -1.588332 |
| H | 1.258886  | 2.383824  | 0.078231  |
| N | -1.400795 | 1.845103  | -0.115241 |
| H | -1.467947 | 1.947256  | 0.893355  |
| H | -1.195729 | 2.774001  | -0.467635 |

eq2

```
=====
```

|   |           |           |           |
|---|-----------|-----------|-----------|
| C | -0.589673 | -0.509359 | -0.175836 |
| C | -0.281726 | 0.962148  | -0.420452 |
| H | -0.050666 | 1.062421  | -1.490763 |
| C | -1.365313 | -0.907681 | 1.044498  |
| C | -1.983826 | -1.034488 | -0.328900 |
| C | 0.973991  | 1.350555  | 0.358017  |
| C | 2.160594  | 0.463549  | -0.017954 |
| H | 2.414659  | 0.633079  | -1.068844 |
| H | 3.036476  | 0.743388  | 0.569221  |
| C | 0.566577  | -1.404178 | -0.575488 |
| C | 1.835338  | -1.016607 | 0.185117  |
| H | 1.683089  | -1.208688 | 1.251481  |
| H | 2.674044  | -1.636012 | -0.136907 |
| H | -1.745968 | -0.122524 | 1.680772  |
| H | -1.067101 | -1.816615 | 1.548874  |
| H | -2.099485 | -2.027438 | -0.741365 |
| H | -2.777425 | -0.343272 | -0.575460 |
| H | 0.759756  | 1.255310  | 1.427206  |
| H | 0.305677  | -2.446810 | -0.384521 |
| H | 0.745682  | -1.306917 | -1.651676 |
| H | 1.208626  | 2.400368  | 0.165229  |
| N | -1.391742 | 1.835257  | -0.031349 |
| H | -1.085836 | 2.800530  | -0.095181 |
| H | -2.155104 | 1.742745  | -0.692636 |

eq3

```
=====
```

|   |           |           |           |
|---|-----------|-----------|-----------|
| C | -0.590796 | -0.500050 | -0.177373 |
| C | -0.272503 | 0.973587  | -0.442123 |
| H | -0.070234 | 1.066208  | -1.515033 |
| C | -1.404183 | -0.878870 | 1.025222  |
| C | -1.978162 | -1.029833 | -0.364647 |
| C | 0.999613  | 1.361037  | 0.312622  |

|   |           |           |           |
|---|-----------|-----------|-----------|
| C | 2.174437  | 0.445670  | -0.028378 |
| H | 2.430868  | 0.573624  | -1.084681 |
| H | 3.053300  | 0.736561  | 0.549088  |
| C | 0.565495  | -1.413618 | -0.536524 |
| C | 1.829728  | -1.020849 | 0.226062  |
| H | 1.663629  | -1.172934 | 1.296940  |
| H | 2.662525  | -1.663126 | -0.065050 |
| H | -1.815570 | -0.093686 | 1.644382  |
| H | -1.122077 | -1.777306 | 1.556783  |
| H | -2.078256 | -2.030029 | -0.763113 |
| H | -2.765452 | -0.346111 | -0.650040 |
| H | 0.789721  | 1.304981  | 1.386982  |
| H | 0.292213  | -2.449452 | -0.326400 |
| H | 0.757719  | -1.342337 | -1.612673 |
| H | 1.244332  | 2.399803  | 0.085081  |
| N | -1.324506 | 1.936917  | -0.123126 |
| H | -2.186878 | 1.700609  | -0.601076 |
| H | -1.526075 | 1.912335  | 0.871523  |

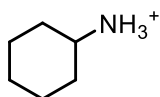

cyclohexanaminium

| Conformation | Electronic Energy | Enthalpy    | Gibbs Free Energy |
|--------------|-------------------|-------------|-------------------|
| ax           | -291.653446       | -291.440894 | -291.478459       |
| eq           | -291.655130       | -291.44356  | -291.481983       |

ax

|   |           |           |           |
|---|-----------|-----------|-----------|
| C | 0.345993  | -0.580418 | -1.267796 |
| C | -0.255405 | -1.175273 | 0.000000  |
| H | -0.146526 | -2.257146 | 0.000000  |
| C | 0.345993  | -0.580418 | 1.267796  |
| C | 0.345993  | 0.949341  | 1.258848  |
| H | -0.679730 | 1.328007  | 1.313392  |
| H | 0.853901  | 1.310266  | 2.153127  |
| C | 0.345993  | 0.949341  | -1.258848 |
| C | 1.020995  | 1.492369  | -0.000000 |
| H | 2.072991  | 1.191896  | 0.000000  |
| H | 0.997099  | 2.582476  | -0.000000 |
| H | 1.374997  | -0.940877 | 1.322564  |
| H | 0.853901  | 1.310266  | -2.153127 |
| H | -0.679730 | 1.328007  | -1.313392 |
| H | -0.177888 | -0.970016 | 2.142426  |
| N | -1.745869 | -0.945722 | -0.000000 |
| H | -2.178448 | -1.364976 | -0.826262 |
| H | -2.178448 | -1.364976 | 0.826262  |

|   |           |           |           |
|---|-----------|-----------|-----------|
| H | -1.985524 | 0.048379  | -0.000000 |
| H | -0.177888 | -0.970016 | -2.142426 |
| H | 1.374997  | -0.940877 | -1.322564 |

eq

```

=====
C   0.095515   0.299968   1.262194
C  -0.571776   0.821771   0.000000
H  -1.631400   0.565404   0.000000
C   0.095515   0.299968  -1.262194
C   0.095515  -1.228833  -1.259218
H  -0.936795  -1.587123  -1.305821
H   0.602334  -1.592637  -2.152903
C   0.095515  -1.228833   1.259218
C   0.765197  -1.776946  -0.000000
H   1.821117  -1.490412  -0.000000
H   0.727077  -2.866748  -0.000000
H   1.126296   0.667901  -1.290044
H   0.602334  -1.592637   2.152903
H  -0.936795  -1.587123   1.305821
H  -0.421217   0.686783  -2.142209
N  -0.516593   2.321163   0.000000
H   0.454068   2.646414   0.000000
H  -0.974414   2.712392  -0.826794
H  -0.974414   2.712392   0.826794
H  -0.421217   0.686783   2.142209
H   1.126296   0.667901   1.290044

```

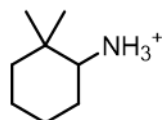

2,2-dimethylcyclohexan-1-aminium

| Conformation | Electronic Energy | Enthalpy    | Gibbs Free Energy |
|--------------|-------------------|-------------|-------------------|
| ax           | -370.267659       | -369.997031 | -370.04077        |
| eq           | -370.268844       | -369.998268 | -370.042111       |

ax

```

=====
C  -0.885623  -0.308051   0.053088
C  -0.119122   0.920934   0.582129
H  -0.658569   1.348187   1.426502
C  -1.159180  -1.234062   1.243906
C  -2.233409   0.110099  -0.541985
C   1.327969   0.628749   0.969478
C   2.100626  -0.083436  -0.141529
H   2.224847   0.579555  -1.003965

```

|   |           |           |           |
|---|-----------|-----------|-----------|
| H | 3.104182  | -0.316368 | 0.214103  |
| C | -0.053741 | -1.034384 | -1.020376 |
| C | 1.374392  | -1.353545 | -0.579812 |
| H | 1.361647  | -2.067691 | 0.246727  |
| H | 1.911259  | -1.829375 | -1.400980 |
| H | -0.247802 | -1.574544 | 1.731639  |
| H | -1.704348 | -2.113846 | 0.900248  |
| H | -2.119464 | 0.676279  | -1.469157 |
| H | -2.806657 | 0.712183  | 0.166888  |
| H | 1.311275  | 0.002750  | 1.861690  |
| H | -0.584632 | -1.946874 | -1.299303 |
| H | -0.013826 | -0.417606 | -1.924963 |
| H | 1.816608  | 1.563770  | 1.251169  |
| N | -0.113193 | 2.018400  | -0.454795 |
| H | -1.048196 | 2.399674  | -0.606083 |
| H | 0.486480  | 2.789335  | -0.152738 |
| H | 0.239483  | 1.691401  | -1.357603 |
| H | -2.818637 | -0.778769 | -0.779240 |
| H | -1.772758 | -0.724686 | 1.989247  |

eq

```
=====
```

|   |           |           |           |
|---|-----------|-----------|-----------|
| C | -0.607628 | -0.621733 | -0.016826 |
| C | -0.349633 | 0.842122  | -0.419981 |
| H | -0.315297 | 0.896663  | -1.509025 |
| C | -0.879348 | -0.770288 | 1.484290  |
| C | -1.799714 | -1.186759 | -0.794412 |
| C | 0.925010  | 1.441068  | 0.157893  |
| C | 2.136405  | 0.603887  | -0.245658 |
| H | 2.264077  | 0.660910  | -1.330324 |
| H | 3.035478  | 1.021802  | 0.206792  |
| C | 0.652700  | -1.412923 | -0.420951 |
| C | 1.948462  | -0.854924 | 0.163061  |
| H | 1.934196  | -0.931546 | 1.252872  |
| H | 2.791643  | -1.452771 | -0.184708 |
| H | -1.828255 | -0.309722 | 1.767940  |
| H | -0.093649 | -0.339466 | 2.102794  |
| H | -1.670717 | -1.045265 | -1.868856 |
| H | -2.745768 | -0.732056 | -0.493320 |
| H | 0.845937  | 1.484495  | 1.246939  |
| H | 0.509259  | -2.452015 | -0.118691 |
| H | 0.726539  | -1.405033 | -1.513188 |
| H | 1.029821  | 2.466271  | -0.201640 |
| N | -1.496972 | 1.729818  | -0.022228 |
| H | -1.599582 | 1.775769  | 0.994604  |
| H | -1.337360 | 2.683959  | -0.353733 |
| H | -2.385736 | 1.414198  | -0.415627 |
| H | -0.953651 | -1.830551 | 1.729698  |
| H | -1.885658 | -2.257075 | -0.601425 |

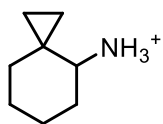

spiro[2.5]octan-4-aminium

| Conformation | Electronic Energy | Enthalpy    | Gibbs Free Energy |
|--------------|-------------------|-------------|-------------------|
| ax           | -369.037417       | -368.790075 | -368.832217       |
| eq           | -369.034441       | -368.787147 | -368.829308       |

ax

|   |           |           |           |
|---|-----------|-----------|-----------|
| C | -0.834978 | -0.185668 | -0.045229 |
| C | -0.040280 | 1.012084  | 0.413532  |
| H | -0.612377 | 1.587925  | 1.138363  |
| C | -1.803541 | -0.741930 | 0.957148  |
| C | -2.309344 | -0.000818 | -0.253000 |
| C | 1.318499  | 0.622698  | 0.985418  |
| C | 2.084983  | -0.345974 | 0.081770  |
| H | 2.375675  | 0.150949  | -0.849360 |
| H | 3.010404  | -0.636366 | 0.578693  |
| C | -0.069189 | -1.159652 | -0.919061 |
| C | 1.239911  | -1.575551 | -0.248512 |
| H | 1.015709  | -2.119188 | 0.673766  |
| H | 1.795741  | -2.252050 | -0.898110 |
| H | -1.881965 | -0.248928 | 1.915735  |
| H | -1.922110 | -1.815737 | 0.977102  |
| H | -2.771469 | -0.577637 | -1.041210 |
| H | -2.723997 | 0.986006  | -0.096608 |
| H | 1.123567  | 0.140974  | 1.945504  |
| H | -0.700850 | -2.025492 | -1.120077 |
| H | 0.152696  | -0.698750 | -1.887955 |
| H | 1.902585  | 1.521827  | 1.188112  |
| N | 0.158096  | 1.953975  | -0.750510 |
| H | -0.742356 | 2.233658  | -1.146056 |
| H | 0.651938  | 2.798954  | -0.455430 |
| H | 0.703775  | 1.524891  | -1.501303 |

eq

|   |           |           |           |
|---|-----------|-----------|-----------|
| C | -0.555545 | -0.560200 | -0.176277 |
| C | -0.263800 | 0.903871  | -0.441261 |
| H | -0.109262 | 1.048994  | -1.511414 |
| C | -1.354814 | -0.984788 | 1.021180  |
| C | -1.916286 | -1.154697 | -0.370779 |
| C | 0.962328  | 1.375289  | 0.330221  |
| C | 2.175110  | 0.518129  | -0.027820 |
| H | 2.418288  | 0.667787  | -1.083552 |
| H | 3.036891  | 0.849856  | 0.550818  |

|   |           |           |           |
|---|-----------|-----------|-----------|
| C | 0.648054  | -1.411168 | -0.540177 |
| C | 1.893919  | -0.962318 | 0.221892  |
| H | 1.739544  | -1.126648 | 1.292117  |
| H | 2.752282  | -1.564236 | -0.077783 |
| H | -1.816675 | -0.239110 | 1.653832  |
| H | -1.016557 | -1.866855 | 1.546047  |
| H | -1.954478 | -2.152319 | -0.784340 |
| H | -2.748031 | -0.522949 | -0.651875 |
| H | 0.751167  | 1.293117  | 1.400778  |
| H | 0.417984  | -2.455912 | -0.328478 |
| H | 0.830721  | -1.329417 | -1.616343 |
| H | 1.151645  | 2.426535  | 0.105886  |
| N | -1.415448 | 1.793060  | -0.085872 |
| H | -1.623897 | 1.759285  | 0.915533  |
| H | -1.189421 | 2.764666  | -0.312919 |
| H | -2.265854 | 1.551082  | -0.599065 |

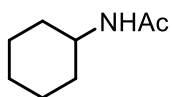

*N*-cyclohexylacetamide

| Conformation | Electronic Energy | Enthalpy    | Gibbs Free Energy |
|--------------|-------------------|-------------|-------------------|
| ax           | -443.851002       | -443.613224 | -443.660665       |
| ax2          | -443.839417       | -443.601308 | -443.649772       |
| eq           | -443.852124       | -443.614545 | -443.662101       |
| eq2          | -443.848671       | -443.610942 | -443.658011       |

ax

|   |           |           |           |
|---|-----------|-----------|-----------|
| C | 1.254584  | -0.984534 | -1.097624 |
| C | 0.152281  | 0.055377  | -0.891968 |
| H | -0.334085 | 0.261882  | -1.844851 |
| C | 0.730184  | 1.362865  | -0.336896 |
| C | 1.554209  | 1.129903  | 0.928672  |
| H | 1.971485  | 2.075490  | 1.277678  |
| H | 0.901184  | 0.759653  | 1.724923  |
| C | 2.096982  | -1.205855 | 0.161024  |
| C | 2.668647  | 0.113888  | 0.678772  |
| H | 3.241076  | -0.055411 | 1.592130  |
| H | 3.362219  | 0.519336  | -0.064791 |
| H | 1.367440  | 1.803843  | -1.108594 |
| H | 1.490828  | -1.667185 | 0.947132  |
| H | 2.900598  | -1.909809 | -0.059582 |
| H | -0.086326 | 2.060905  | -0.149467 |
| H | 0.813417  | -1.922340 | -1.439950 |
| H | 1.904178  | -0.620754 | -1.897189 |

|   |           |           |           |
|---|-----------|-----------|-----------|
| N | -0.878242 | -0.486315 | -0.009296 |
| C | -2.141223 | -0.015469 | 0.009381  |
| O | -2.515255 | 0.896729  | -0.721204 |
| C | -3.084615 | -0.681884 | 0.980513  |
| H | -2.611339 | -1.473601 | 1.557088  |
| H | -3.475397 | 0.075136  | 1.659345  |
| H | -3.923780 | -1.094011 | 0.421407  |
| H | -0.638049 | -1.228507 | 0.628176  |

ax2

```
=====
```

|   |           |           |           |
|---|-----------|-----------|-----------|
| C | -0.955170 | 0.529727  | 1.422991  |
| C | -0.206955 | 1.221689  | 0.270233  |
| H | -0.176772 | 2.281589  | 0.519286  |
| C | -0.970428 | 1.108149  | -1.059436 |
| C | -1.541323 | -0.278010 | -1.359272 |
| H | -2.144889 | -0.223603 | -2.267546 |
| H | -0.730715 | -0.983133 | -1.539361 |
| C | -1.567454 | -0.833929 | 1.095548  |
| C | -2.391064 | -0.775589 | -0.190586 |
| H | -2.805872 | -1.759731 | -0.415692 |
| H | -3.238957 | -0.096341 | -0.048689 |
| H | -1.806527 | 1.811647  | -0.999760 |
| H | -0.779987 | -1.575619 | 0.979734  |
| H | -2.198827 | -1.143479 | 1.931081  |
| H | -0.325323 | 1.451882  | -1.869537 |
| H | -0.292938 | 0.462616  | 2.287717  |
| H | -1.770414 | 1.203885  | 1.702480  |
| N | 1.224633  | 0.889327  | 0.173263  |
| C | 1.816613  | -0.301740 | -0.050003 |
| O | 1.209209  | -1.354628 | -0.204208 |
| C | 3.327994  | -0.272199 | -0.096059 |
| H | 3.744851  | 0.725154  | 0.023034  |
| H | 3.708313  | -0.918063 | 0.694651  |
| H | 3.651087  | -0.687575 | -1.049623 |
| H | 1.847583  | 1.673925  | 0.272543  |

eq

```
=====
```

|   |          |           |           |
|---|----------|-----------|-----------|
| C | 0.673523 | 1.027975  | -0.580345 |
| C | 0.118026 | -0.176539 | 0.181680  |
| H | 0.029592 | 0.090252  | 1.236919  |
| C | 1.043768 | -1.381690 | 0.046769  |
| C | 2.458965 | -1.039863 | 0.511817  |
| H | 3.110443 | -1.904576 | 0.378769  |
| H | 2.438094 | -0.817385 | 1.582932  |
| C | 2.084166 | 1.372921  | -0.105170 |
| C | 3.015903 | 0.169073  | -0.239491 |
| H | 4.011364 | 0.416573  | 0.132446  |
| H | 3.122783 | -0.084666 | -1.298814 |
| H | 0.640980 | -2.218394 | 0.620233  |
| H | 2.471597 | 2.220932  | -0.671573 |
| H | 2.043997 | 1.681333  | 0.944129  |
| H | 1.068813 | -1.687071 | -1.005074 |

|   |           |           |           |
|---|-----------|-----------|-----------|
| H | -0.000594 | 1.876016  | -0.452607 |
| H | 0.694649  | 0.779686  | -1.646456 |
| N | -1.217649 | -0.529835 | -0.278791 |
| C | -2.334463 | 0.092707  | 0.149710  |
| O | -2.312319 | 0.977943  | 0.998848  |
| C | -3.629908 | -0.372010 | -0.468820 |
| H | -3.490490 | -1.170057 | -1.194657 |
| H | -4.289880 | -0.717056 | 0.326147  |
| H | -4.107490 | 0.478541  | -0.953776 |
| H | -1.301638 | -1.214267 | -1.014767 |

eq2

```
=====
```

|   |           |           |           |
|---|-----------|-----------|-----------|
| C | 0.705307  | -1.263181 | -0.082305 |
| C | 0.158171  | 0.000089  | -0.750222 |
| H | 0.496997  | 0.000136  | -1.789020 |
| C | 0.705417  | 1.263241  | -0.082169 |
| C | 2.234168  | 1.258525  | -0.095022 |
| H | 2.611205  | 2.152096  | 0.404660  |
| H | 2.586665  | 1.299116  | -1.130580 |
| C | 2.234059  | -1.258598 | -0.095150 |
| C | 2.788292  | -0.000094 | 0.571657  |
| H | 3.878833  | -0.000140 | 0.531393  |
| H | 2.505491  | -0.000136 | 1.628908  |
| H | 0.319253  | 2.141805  | -0.602442 |
| H | 2.611016  | -2.152252 | 0.404442  |
| H | 2.586553  | -1.299115 | -1.130711 |
| H | 0.344002  | 1.301370  | 0.946712  |
| H | 0.319067  | -2.141658 | -0.602669 |
| H | 0.343884  | -1.301385 | 0.946573  |
| N | -1.303422 | 0.000154  | -0.831309 |
| C | -2.147252 | 0.000040  | 0.221320  |
| O | -1.769651 | -0.000090 | 1.388172  |
| C | -3.618695 | -0.000038 | -0.121864 |
| H | -3.808324 | -0.000184 | -1.192933 |
| H | -4.078061 | -0.880334 | 0.326238  |
| H | -4.078081 | 0.880376  | 0.325988  |
| H | -1.714146 | 0.000040  | -1.750248 |



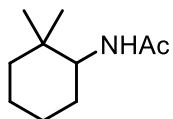

*N*-(2,2-dimethylcyclohexyl)acetamide

| Conformation | Electronic Energy | Enthalpy    | Gibbs Free Energy |
|--------------|-------------------|-------------|-------------------|
| ax1          | -522.465234       | -522.16885  | -522.222262       |
| ax2          | -522.465394       | -522.168931 | -522.221586       |
| eq1          | -522.467170       | -522.170884 | -522.223953       |
| eq3          | -522.461603       | -522.165077 | -522.217236       |

ax1

| ===== |           |           |           |
|-------|-----------|-----------|-----------|
| C     | 1.201418  | 0.878788  | 0.017512  |
| C     | -0.008859 | 0.124102  | 0.615815  |
| H     | -0.347673 | 0.665406  | 1.500196  |
| C     | 0.337544  | -1.318188 | 1.011599  |
| C     | 0.940607  | -2.095231 | -0.158120 |
| H     | 1.200974  | -3.104948 | 0.162280  |
| H     | 0.191171  | -2.198862 | -0.948815 |
| C     | 1.824018  | 0.054675  | -1.125007 |
| C     | 2.167935  | -1.379939 | -0.722010 |
| H     | 2.554061  | -1.920256 | -1.587871 |
| H     | 2.963656  | -1.377418 | 0.026976  |
| H     | 1.040654  | -1.303298 | 1.846349  |
| H     | 1.124539  | 0.023255  | -1.967829 |
| H     | 2.714315  | 0.576190  | -1.485256 |
| H     | -0.572361 | -1.801951 | 1.369265  |
| C     | 2.232895  | 1.115378  | 1.127282  |
| H     | 3.093822  | 1.650308  | 0.722227  |
| H     | 1.800673  | 1.725984  | 1.922665  |
| H     | 2.596347  | 0.192145  | 1.574293  |
| C     | 0.770348  | 2.247259  | -0.514984 |
| H     | 0.251074  | 2.818148  | 0.258262  |
| H     | 1.647844  | 2.817778  | -0.824988 |
| H     | 0.107762  | 2.162804  | -1.376608 |
| N     | -1.132907 | 0.126833  | -0.317467 |
| C     | -2.415444 | 0.039240  | 0.085924  |
| O     | -2.735533 | -0.015380 | 1.269622  |
| C     | -3.453403 | 0.021531  | -1.009658 |
| H     | -3.018967 | 0.061206  | -2.006174 |
| H     | -4.047413 | -0.886095 | -0.910548 |
| H     | -4.119069 | 0.872770  | -0.871447 |
| H     | -0.949151 | 0.136348  | -1.307805 |

ax2

```
=====
C -0.871516      0.961506      0.107839
C -0.034430     -0.053294     -0.715096
H  0.404782      0.475724     -1.560111
C -0.885130     -1.223040     -1.225416
C -1.637098     -1.929394     -0.095859
H -2.261786     -2.721450     -0.511024
H -0.927719     -2.419331      0.578748
C -1.634525      0.219238      1.218766
C -2.486796     -0.940916      0.702625
H -2.963363     -1.448850      1.542628
H -3.291472     -0.560300      0.068900
H -1.604446     -0.844560     -1.953206
H -0.908406     -0.171435      1.940230
H -2.254932      0.937988      1.760102
H -0.236230     -1.923673     -1.753015
C -1.845178      1.684604     -0.830003
H -2.424450      2.419626     -0.267725
H -1.295530      2.216614     -1.609597
H -2.548308      1.011657     -1.317302
C  0.041083      2.014925      0.736757
H  0.626805      2.529143     -0.027278
H -0.558982      2.758183      1.265578
H  0.733381      1.571446      1.453127
N  1.094343     -0.575846      0.047577
C  2.367676     -0.155747     -0.107458
O  2.701525      0.687452     -0.932886
C  3.381650     -0.788826      0.814771
H  2.965656     -1.594059      1.416265
H  4.208556     -1.169025      0.217386
H  3.774166     -0.015300      1.474971
H  0.915261     -1.255429      0.769811
```

eq1

```
=====
C -0.778264      0.922251      0.049002
C -0.028731     -0.418794     -0.146620
H  0.142964     -0.541044     -1.217350
C -0.820626     -1.625152      0.361456
C -2.202003     -1.699562     -0.285346
H -2.082192     -1.879037     -1.358224
H -2.757808     -2.546204      0.120056
C -2.167752      0.789433     -0.599520
C -2.975866     -0.398962     -0.082577
H -3.933791     -0.446679     -0.603064
H -3.200459     -0.268389      0.979061
H -0.923046     -1.562076      1.448722
H -2.715357      1.722793     -0.446523
H -2.031871      0.674857     -1.680320
H -0.249190     -2.529882      0.147351
C -0.011682      2.040723     -0.657337
H -0.543833      2.988297     -0.549177
```

|   |           |           |           |
|---|-----------|-----------|-----------|
| H | 0.986725  | 2.165004  | -0.234788 |
| H | 0.095181  | 1.828412  | -1.722428 |
| C | -0.909114 | 1.281140  | 1.532827  |
| H | 0.071834  | 1.448401  | 1.981253  |
| H | -1.480548 | 2.205467  | 1.638133  |
| H | -1.416707 | 0.509977  | 2.111309  |
| N | 1.289323  | -0.405873 | 0.471560  |
| C | 2.449320  | -0.285870 | -0.207607 |
| O | 2.503795  | -0.165013 | -1.426793 |
| C | 3.704241  | -0.303491 | 0.631551  |
| H | 4.214181  | 0.651615  | 0.508339  |
| H | 3.508575  | -0.471940 | 1.688105  |
| H | 4.363523  | -1.084204 | 0.255068  |
| H | 1.339072  | -0.514453 | 1.472927  |

eq3

```
=====
```

|   |           |           |           |
|---|-----------|-----------|-----------|
| C | -0.832986 | 0.966828  | 0.057246  |
| C | -0.092926 | -0.144387 | -0.728292 |
| H | -0.420209 | -0.041718 | -1.767517 |
| C | -0.482270 | -1.557051 | -0.288276 |
| C | -1.988239 | -1.759659 | -0.444820 |
| H | -2.260758 | -1.676157 | -1.501790 |
| H | -2.262264 | -2.765207 | -0.122150 |
| C | -2.344587 | 0.697064  | -0.066573 |
| C | -2.758883 | -0.711300 | 0.355156  |
| H | -3.833140 | -0.836741 | 0.209075  |
| H | -2.566139 | -0.855461 | 1.421392  |
| H | -0.191584 | -1.723257 | 0.746485  |
| H | -2.880918 | 1.447093  | 0.520100  |
| H | -2.634866 | 0.846469  | -1.112222 |
| H | 0.069229  | -2.277140 | -0.896130 |
| C | -0.532261 | 2.326366  | -0.576837 |
| H | -1.120752 | 3.106871  | -0.090345 |
| H | 0.521285  | 2.590525  | -0.473253 |
| H | -0.783711 | 2.327526  | -1.640057 |
| C | -0.408794 | 1.010975  | 1.527154  |
| H | 0.649809  | 1.255499  | 1.616897  |
| H | -0.979974 | 1.782914  | 2.047881  |
| H | -0.571799 | 0.063999  | 2.038854  |
| N | 1.357146  | 0.064446  | -0.786053 |
| C | 2.294991  | -0.343244 | 0.097043  |
| O | 2.053025  | -0.976996 | 1.117303  |
| C | 3.716274  | 0.038817  | -0.252705 |
| H | 4.319010  | -0.867700 | -0.286226 |
| H | 3.802449  | 0.565041  | -1.200527 |
| H | 4.107559  | 0.669273  | 0.545239  |
| H | 1.690652  | 0.606562  | -1.566334 |

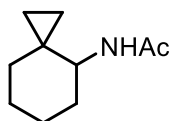

*N*-(spiro[2.5]octan-4-yl)acetamide

| Conformation | Electronic Energy | Enthalpy    | Gibbs Free Energy |
|--------------|-------------------|-------------|-------------------|
| ax           | -521.234970       | -520.961945 | -521.015028       |
| ax1          | -521.223975       | -520.950404 | -521.002455       |
| ax2          | -521.234411       | -520.961109 | -521.012547       |
| eq1          | -521.235337       | -520.96219  | -521.013374       |
| eq2          | -521.229251       | -520.955808 | -521.006473       |
| eq3          | -521.235336       | -520.96219  | -521.013373       |

ax

```

=====
C  1.225860  -0.756529  -0.084882
C  -0.010489 -0.186512   0.581484
H  -0.312875 -0.841466   1.399268
C  2.141060  -1.566128   0.785593
C  1.297978  -2.240479  -0.269667
C  0.276602   1.214017   1.136405
C  0.873862   2.135473   0.073212
H  0.140001   2.296767  -0.722410
H  1.086169   3.112384   0.509412
C  1.857786   0.152373  -1.120918
C  2.143791   1.532742  -0.528401
H  2.902137   1.435938   0.254562
H  2.553237   2.192717  -1.294540
H  1.861095  -1.713319   1.819330
H  3.203386  -1.483025   0.602787
H  1.800151  -2.612413  -1.151876
H  0.454787  -2.829078   0.065144
H  0.983133   1.108275   1.964331
H  2.773645  -0.309837  -1.493247
H  1.188913   0.261819  -1.981698
H  -0.645298  1.630577   1.542845
N  -1.117791  -0.165120  -0.373056
C  -2.408300  -0.125621   0.013441
H  -0.914095  -0.191699  -1.359377
O  -2.740746  -0.100841   1.194419
C  -3.433003  -0.117943  -1.094170
H  -4.092224  -0.975230  -0.963854
H  -4.036393   0.784343  -1.001915
H  -2.986141  -0.152539  -2.085299

```

ax1

```
=====
C  1.062705    -0.775050    -0.134412
C  0.131651    -0.315388     0.981347
H  0.319399    -0.968660     1.833144
C  2.235174    -1.612539     0.302878
C  1.084796    -2.238001    -0.446028
C  0.477512     1.112605     1.440359
C  0.794379     2.113863     0.326444
H -0.116163     2.368816    -0.211241
H  1.182430     3.027750     0.780840
C  1.327069     0.221868    -1.245083
C  1.815144     1.547884    -0.661123
H  2.768824     1.383440    -0.148523
H  2.001114     2.266475    -1.461151
H  2.334778    -1.845718     1.353825
H  3.167257    -1.476855    -0.228028
H  1.251046    -2.529222    -1.473880
H  0.416172    -2.880719     0.110826
H  1.367520     1.017571     2.069301
H  2.073399    -0.196833    -1.923617
H  0.413057     0.392600    -1.814675
H -0.323554     1.484575     2.080884
N -1.296741    -0.556649     0.715828
C -2.111498     0.028553    -0.186062
H -1.706539    -1.300426     1.256146
O -1.764829     0.925487    -0.945045
C -3.531373    -0.491907    -0.207479
H -4.202755     0.333404     0.027247
H -3.758214    -0.828291    -1.218251
H -3.705318    -1.306593     0.491664
```

ax2

```
=====
C  0.874433     0.860260     0.150169
C  0.020246    -0.060164    -0.705839
H -0.427271     0.519939    -1.510958
C  1.504209     2.032099    -0.542885
C  0.359105     2.238193     0.421407
C  0.879315    -1.185774    -1.291010
C  1.682139    -1.925606    -0.218339
H  1.006789    -2.460777     0.457046
H  2.307994    -2.683397    -0.691394
C  1.677279     0.142817     1.214883
C  2.541276    -0.955711     0.593847
H  3.284719    -0.496747    -0.065032
H  3.086684    -1.492548     1.371330
H  1.301221     2.169524    -1.596174
H  2.492419     2.331611    -0.222107
H  0.587788     2.678260     1.382279
H -0.604085     2.500020     0.006425
H  1.574540    -0.733733    -2.002827
H  2.293135     0.864390     1.754510
H  0.994830    -0.304505     1.946049
```

|   |           |           |           |
|---|-----------|-----------|-----------|
| H | 0.243621  | -1.875892 | -1.847524 |
| N | -1.097748 | -0.611072 | 0.054809  |
| C | -2.357929 | -0.131369 | -0.019334 |
| H | -0.921116 | -1.367911 | 0.696500  |
| O | -2.677849 | 0.801126  | -0.748821 |
| C | -3.376081 | -0.823080 | 0.854270  |
| H | -3.800388 | -0.088315 | 1.537611  |
| H | -4.181118 | -1.194054 | 0.221364  |
| H | -2.956684 | -1.647353 | 1.426786  |

eq1

```
=====
```

|   |           |           |           |
|---|-----------|-----------|-----------|
| C | 0.774461  | 0.841983  | -0.078782 |
| C | 0.061565  | -0.505146 | -0.148732 |
| H | -0.075907 | -0.758946 | -1.201739 |
| C | -0.008564 | 2.111652  | -0.173255 |
| C | 0.599233  | 1.693536  | 1.144946  |
| C | 0.914806  | -1.584263 | 0.518979  |
| C | 2.312692  | -1.645929 | -0.095526 |
| H | 2.907139  | -2.403994 | 0.416104  |
| H | 2.227808  | -1.957944 | -1.140887 |
| C | 2.155029  | 0.788738  | -0.700808 |
| C | 3.010903  | -0.287984 | -0.034417 |
| H | 3.179949  | -0.014857 | 1.011530  |
| H | 3.988767  | -0.344377 | -0.514934 |
| H | -1.082656 | 2.040441  | -0.268416 |
| H | 0.447646  | 2.939028  | -0.698869 |
| H | 1.463136  | 2.238395  | 1.499667  |
| H | -0.079214 | 1.356463  | 1.916454  |
| H | 0.991427  | -1.354859 | 1.587289  |
| H | 2.629721  | 1.768022  | -0.617986 |
| H | 2.059326  | 0.564201  | -1.768546 |
| H | 0.411768  | -2.548103 | 0.426051  |
| N | -1.262122 | -0.486950 | 0.447957  |
| C | -2.401427 | -0.305685 | -0.254684 |
| H | -1.336107 | -0.650354 | 1.440338  |
| O | -2.412527 | -0.113923 | -1.465229 |
| C | -3.680154 | -0.352748 | 0.545235  |
| H | -4.200174 | 0.596445  | 0.421661  |
| H | -4.315991 | -1.137233 | 0.136794  |
| H | -3.512828 | -0.537221 | 1.603889  |

eq2

```
=====
```

|   |          |           |           |
|---|----------|-----------|-----------|
| C | 0.869663 | 0.915367  | -0.161514 |
| C | 0.119724 | -0.277761 | -0.746586 |
| H | 0.430934 | -0.357901 | -1.792665 |
| C | 0.328016 | 2.301443  | -0.327384 |
| C | 0.310527 | 1.635276  | 1.028542  |
| C | 0.546020 | -1.575540 | -0.055599 |
| C | 2.058410 | -1.763713 | -0.174813 |
| H | 2.352717 | -2.690530 | 0.319604  |
| H | 2.334092 | -1.861355 | -1.229653 |
| C | 2.372844 | 0.728535  | -0.235432 |

|   |           |           |           |
|---|-----------|-----------|-----------|
| C | 2.805543  | -0.576333 | 0.431793  |
| H | 2.586768  | -0.523002 | 1.502512  |
| H | 3.883402  | -0.711161 | 0.328849  |
| H | -0.622255 | 2.426643  | -0.826739 |
| H | 1.043825  | 3.095008  | -0.491488 |
| H | 1.012876  | 1.987083  | 1.771807  |
| H | -0.645748 | 1.312962  | 1.412383  |
| H | 0.262658  | -1.536823 | 0.994576  |
| H | 2.866550  | 1.584451  | 0.228144  |
| H | 2.678049  | 0.710403  | -1.287405 |
| H | 0.014325  | -2.414211 | -0.509264 |
| N | -1.330220 | -0.094141 | -0.811349 |
| C | -2.252427 | -0.353516 | 0.143160  |
| H | -1.683828 | 0.279028  | -1.677323 |
| O | -1.986891 | -0.773292 | 1.262930  |
| C | -3.685495 | -0.091196 | -0.261815 |
| H | -4.238865 | -1.026867 | -0.189032 |
| H | -4.121400 | 0.609774  | 0.448643  |
| H | -3.784394 | 0.306454  | -1.269059 |

eq3

```
=====
```

|   |           |           |           |
|---|-----------|-----------|-----------|
| C | 0.774421  | 0.841992  | -0.078757 |
| C | 0.061613  | -0.505171 | -0.148766 |
| H | -0.075825 | -0.758966 | -1.201776 |
| C | -0.008671 | 2.111622  | -0.173211 |
| C | 0.599108  | 1.693471  | 1.144991  |
| C | 0.914881  | -1.584256 | 0.518956  |
| C | 2.312771  | -1.645878 | -0.095564 |
| H | 2.907250  | -2.403924 | 0.416057  |
| H | 2.227882  | -1.957891 | -1.140923 |
| C | 2.155005  | 0.788828  | -0.700768 |
| C | 3.010922  | -0.287906 | -0.034442 |
| H | 3.179971  | -0.014810 | 1.011514  |
| H | 3.988785  | -0.344245 | -0.514967 |
| H | -1.082760 | 2.040511  | -0.268462 |
| H | 0.447647  | 2.938988  | -0.698753 |
| H | 1.462923  | 2.238389  | 1.499831  |
| H | -0.079364 | 1.356200  | 1.916391  |
| H | 0.991518  | -1.354847 | 1.587264  |
| H | 2.629678  | 1.768116  | -0.617859 |
| H | 2.059307  | 0.564383  | -1.768524 |
| H | 0.411884  | -2.548122 | 0.426053  |
| N | -1.262084 | -0.487002 | 0.447913  |
| C | -2.401402 | -0.305748 | -0.254688 |
| H | -1.336059 | -0.650763 | 1.440238  |
| O | -2.412562 | -0.113869 | -1.465227 |
| C | -3.680121 | -0.352804 | 0.545242  |
| H | -4.199526 | 0.596850  | 0.422578  |
| H | -4.316505 | -1.136467 | 0.136092  |
| H | -3.512884 | -0.538353 | 1.603721  |

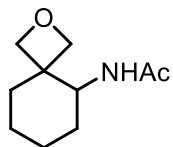

*N*-(2-oxaspiro[3.5]nonan-5-yl)acetamide

| Conformation | Electronic Energy | Enthalpy    | Gibbs Free Energy |
|--------------|-------------------|-------------|-------------------|
| ax1          | -596.444056       | -596.163919 | -596.217283       |
| ax2          | -596.444352       | -596.164063 | -596.217144       |
| ax3          | -596.441450       | -596.161211 | -596.213375       |
| eq1          | -596.444504       | -596.164541 | -596.217454       |
| eq2          | -596.445516       | -596.165354 | -596.218192       |

ax1

| ===== |           |           |           |
|-------|-----------|-----------|-----------|
| C     | 0.165681  | -0.041525 | 0.573392  |
| H     | 0.341082  | -0.754722 | 1.378332  |
| C     | 0.093115  | 1.374958  | 1.152289  |
| C     | -0.290731 | 2.400539  | 0.086921  |
| H     | -0.356121 | 3.391450  | 0.536438  |
| H     | 0.492197  | 2.448448  | -0.675256 |
| C     | -1.551251 | 0.622090  | -1.171715 |
| C     | -1.616936 | 2.026495  | -0.573148 |
| H     | -1.878003 | 2.749284  | -1.346306 |
| H     | -2.411384 | 2.059718  | 0.178560  |
| H     | -0.660403 | 1.375238  | 1.945292  |
| H     | -0.839048 | 0.606694  | -2.002959 |
| H     | -2.518694 | 0.329818  | -1.585520 |
| H     | 1.050104  | 1.623509  | 1.611863  |
| C     | -1.141495 | -0.405761 | -0.120418 |
| C     | -1.276904 | -1.863035 | -0.582839 |
| C     | -2.289970 | -0.764187 | 0.840435  |
| H     | -0.484647 | -2.523974 | -0.227351 |
| H     | -1.449956 | -2.019777 | -1.647113 |
| H     | -1.986606 | -0.895220 | 1.880504  |
| H     | -3.182179 | -0.141651 | 0.784895  |
| O     | -2.488970 | -2.042542 | 0.190112  |
| N     | 1.281283  | -0.185819 | -0.360388 |
| C     | 2.542177  | -0.390146 | 0.046505  |
| H     | 1.128988  | 0.000521  | -1.339987 |
| O     | 2.834474  | -0.539563 | 1.240687  |
| C     | 3.598383  | -0.444411 | -1.021106 |
| H     | 4.330143  | 0.336960  | -0.820537 |
| H     | 4.106776  | -1.405222 | -0.955780 |
| H     | 3.192328  | -0.313600 | -2.020641 |



ax2

```
=====
C  0.059722   -0.199590   -0.672523
H  0.417965    0.470588   -1.451899
C -0.639414   -1.402381   -1.310431
C -1.299774   -2.306323   -0.269428
H -0.538423   -2.763727    0.369568
H -1.817219   -3.123619   -0.771915
C -1.563877   -0.332009    1.266218
C -2.273101   -1.508607    0.596810
H -2.729327   -2.150339    1.350641
H -3.082265   -1.126042   -0.033689
H  0.076751   -1.956328   -1.917386
H -2.265661    0.257650    1.858433
H -0.801900   -0.707070    1.956865
H -1.409161   -1.019546   -1.985134
C -0.911127    0.570652    0.230309
C -0.339606    1.903522    0.731020
C -1.866853    1.459918   -0.585634
H  0.727567    2.066248    0.581416
H -0.617460    2.150708    1.756725
H -1.878232    1.311550   -1.665269
H -2.887241    1.488871   -0.200012
O -1.135723    2.654880   -0.218825
N  1.240915   -0.616197    0.077337
C  2.457193   -0.067299   -0.061988
H  1.133637   -1.337041    0.775255
O  2.698608    0.838532   -0.870599
C  3.543304   -0.616777    0.820411
H  3.195556   -1.416146    1.469430
H  4.349043   -0.984535    0.186824
H  3.938070    0.198221    1.425593
```

ax3

```
=====
C  0.117595    0.204582    0.588090
H  0.551719   -0.460693    1.330993
C -0.566899    1.373927    1.301626
C -1.345183    2.263602    0.332417
H -0.657910    2.752488   -0.364578
H -1.844396    3.057899    0.887455
C -1.678650    0.293235   -1.196370
C -2.363850    1.440189   -0.454202
H -3.101763    1.026028    0.240458
H -2.905200    2.072057   -1.158363
H -1.261586    0.957055    2.035028
H -0.997438    0.698196   -1.951300
H -2.411015   -0.317121   -1.727280
H  0.180959    1.946131    1.850978
C -0.903584   -0.593120   -0.233195
C -0.333275   -1.901815   -0.793368
C -1.746439   -1.522745    0.659483
H  0.749735   -2.019969   -0.765101
H -0.712453   -2.162989   -1.782589
```

|   |           |           |           |
|---|-----------|-----------|-----------|
| H | -1.681696 | -1.370442 | 1.736545  |
| H | -2.790884 | -1.603251 | 0.353701  |
| O | -0.988698 | -2.682259 | 0.236901  |
| N | 1.207535  | 0.671621  | -0.264299 |
| C | 2.499152  | 0.308996  | -0.214410 |
| H | 0.975989  | 1.311810  | -1.013017 |
| O | 3.310540  | 0.758060  | -1.038155 |
| C | 2.941565  | -0.633590 | 0.871398  |
| H | 2.720925  | -0.214492 | 1.852794  |
| H | 2.424214  | -1.588998 | 0.790616  |
| H | 4.010728  | -0.791035 | 0.774967  |

eq1

```
=====
```

|   |           |           |           |
|---|-----------|-----------|-----------|
| C | 0.065653  | -0.423389 | -0.234920 |
| H | 0.198984  | -0.794958 | -1.254155 |
| C | -0.337574 | -1.591183 | 0.667376  |
| C | -1.652392 | -2.209577 | 0.199672  |
| H | -1.514790 | -2.635774 | -0.798339 |
| H | -1.934986 | -3.027423 | 0.862726  |
| C | -2.341612 | 0.016542  | -0.740468 |
| C | -2.754846 | -1.154475 | 0.148897  |
| H | -2.945630 | -0.784980 | 1.161556  |
| H | -3.686194 | -1.588778 | -0.214894 |
| H | 0.462597  | -2.331066 | 0.674551  |
| H | -2.214223 | -0.331955 | -1.769785 |
| H | -3.114789 | 0.786371  | -0.750721 |
| H | -0.448571 | -1.218342 | 1.689983  |
| C | -1.035189 | 0.638113  | -0.269755 |
| C | -1.113908 | 1.499448  | 1.006209  |
| C | -0.619990 | 1.953723  | -0.943717 |
| H | -0.554797 | 1.169638  | 1.882440  |
| H | -2.133428 | 1.758750  | 1.295624  |
| H | 0.306626  | 1.952536  | -1.516110 |
| H | -1.419732 | 2.417712  | -1.522405 |
| O | -0.461147 | 2.608828  | 0.339938  |
| N | 1.340892  | 0.155722  | 0.178338  |
| C | 2.520411  | -0.400231 | -0.125714 |
| H | 1.345317  | 1.023931  | 0.694212  |
| O | 2.606951  | -1.451590 | -0.775556 |
| C | 3.751653  | 0.312477  | 0.358814  |
| H | 3.522217  | 1.226896  | 0.899491  |
| H | 4.308611  | -0.363510 | 1.006200  |
| H | 4.376868  | 0.544306  | -0.502153 |

eq2

```
=====
```

|   |           |           |           |
|---|-----------|-----------|-----------|
| C | 0.068645  | -0.678587 | 0.112810  |
| H | -0.077129 | -1.060386 | 1.123620  |
| C | 0.911776  | -1.672196 | -0.684459 |
| C | 2.298085  | -1.836996 | -0.066079 |
| H | 2.194987  | -2.282435 | 0.927485  |
| H | 2.890971  | -2.526007 | -0.667849 |
| C | 2.152449  | 0.494434  | 0.856094  |

|   |           |           |           |
|---|-----------|-----------|-----------|
| C | 3.005469  | -0.490022 | 0.059551  |
| H | 3.184360  | -0.082350 | -0.940493 |
| H | 3.979139  | -0.612748 | 0.534236  |
| H | 1.007248  | -1.305671 | -1.712052 |
| H | 2.019891  | 0.123935  | 1.877292  |
| H | 2.644024  | 1.466511  | 0.924162  |
| H | 0.391767  | -2.629340 | -0.727911 |
| C | 0.782159  | 0.674902  | 0.217842  |
| C | 0.770013  | 1.507305  | -1.079172 |
| C | -0.073535 | 1.817185  | 0.785009  |
| H | 0.344449  | 1.039973  | -1.967904 |
| H | 1.729324  | 1.962435  | -1.329591 |
| H | -1.065459 | 1.552093  | 1.148698  |
| H | 0.440266  | 2.436608  | 1.521046  |
| O | -0.137534 | 2.477006  | -0.503133 |
| N | -1.255603 | -0.556601 | -0.482052 |
| C | -2.404522 | -0.563773 | 0.209865  |
| H | -1.311031 | -0.431181 | -1.482351 |
| O | -2.445297 | -0.698383 | 1.440045  |
| C | -3.667853 | -0.402369 | -0.588545 |
| H | -4.170448 | 0.504057  | -0.253112 |
| H | -3.485108 | -0.340795 | -1.657926 |
| H | -4.321495 | -1.246779 | -0.375779 |

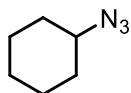

azidocyclohexane

| Conformation | Electronic Energy | Enthalpy    | Gibbs Free Energy |
|--------------|-------------------|-------------|-------------------|
| ax           | -399.413929       | -399.230071 | -399.272793       |
| ax2          | -399.413929       | -399.23007  | -399.272792       |
| eq           | -399.414298       | -399.230578 | -399.273312       |
| eq2          | -399.414418       | -399.230535 | -399.273207       |

ax

|   |           |           |          |
|---|-----------|-----------|----------|
| C | 1.031346  | 1.384246  | 0.436663 |
| C | -0.240904 | 0.613296  | 0.764504 |
| H | -0.729798 | 1.054480  | 1.635202 |
| C | 0.049340  | -0.863878 | 1.023019 |

|   |           |           |           |
|---|-----------|-----------|-----------|
| C | 0.825368  | -1.504783 | -0.127304 |
| H | 1.053253  | -2.542431 | 0.119182  |
| H | 0.200072  | -1.520818 | -1.024785 |
| C | 1.809670  | 0.741011  | -0.710923 |
| C | 2.110142  | -0.729192 | -0.418927 |
| H | 2.640234  | -1.180067 | -1.259127 |
| H | 2.771696  | -0.794497 | 0.450752  |
| H | 0.639454  | -0.919592 | 1.941411  |
| H | 1.223348  | 0.813714  | -1.630791 |
| H | 2.735333  | 1.292957  | -0.878759 |
| H | -0.881407 | -1.402343 | 1.215904  |
| H | 0.777588  | 2.419112  | 0.203260  |
| H | 1.648755  | 1.393570  | 1.338153  |
| N | -1.164240 | 0.799722  | -0.404536 |
| N | -2.191999 | 0.141049  | -0.350726 |
| N | -3.156375 | -0.434810 | -0.375108 |

ax2

```
=====
```

|   |           |           |           |
|---|-----------|-----------|-----------|
| C | 1.032211  | 1.384222  | 0.435910  |
| C | -0.240411 | 0.614374  | 0.764776  |
| H | -0.728719 | 1.056486  | 1.635325  |
| C | 0.048964  | -0.862800 | 1.024057  |
| C | 0.823826  | -1.504889 | -0.126395 |
| H | 1.051054  | -2.542602 | 0.120440  |
| H | 0.198015  | -1.520907 | -1.023527 |
| C | 1.809455  | 0.739838  | -0.711777 |
| C | 2.109009  | -0.730428 | -0.419157 |
| H | 2.638294  | -1.182145 | -1.259415 |
| H | 2.771001  | -0.795764 | 0.450184  |
| H | 0.639598  | -0.918357 | 1.942119  |
| H | 1.222654  | 0.812441  | -1.631349 |
| H | 2.735409  | 1.291045  | -0.880412 |
| H | -0.882017 | -1.400517 | 1.217876  |
| H | 0.779063  | 2.419141  | 0.202098  |
| H | 1.650116  | 1.393589  | 1.337070  |
| N | -1.164046 | 0.800758  | -0.404129 |
| N | -2.191258 | 0.141248  | -0.350780 |
| N | -3.155095 | -0.435479 | -0.375791 |

eq

```
=====
```

|   |           |           |           |
|---|-----------|-----------|-----------|
| C | -0.723600 | -1.374177 | 0.166996  |
| C | 0.308253  | -0.321115 | -0.201720 |
| H | 0.403481  | -0.271627 | -1.291277 |
| C | -0.079979 | 1.051922  | 0.336288  |
| C | -1.460118 | 1.457365  | -0.182900 |
| H | -1.734857 | 2.430220  | 0.226176  |
| H | -1.417449 | 1.567807  | -1.270503 |
| C | -2.106195 | -0.971040 | -0.345494 |
| C | -2.510554 | 0.407328  | 0.176430  |
| H | -3.482602 | 0.692937  | -0.228128 |
| H | -2.615194 | 0.362941  | 1.264726  |
| H | -0.094759 | 1.001690  | 1.428871  |

|   |           |           |           |
|---|-----------|-----------|-----------|
| H | -2.092175 | -0.951296 | -1.439375 |
| H | -2.839653 | -1.721956 | -0.049912 |
| H | 0.669798  | 1.792240  | 0.048780  |
| H | -0.423381 | -2.339927 | -0.241469 |
| H | -0.744633 | -1.468484 | 1.256711  |
| N | 1.619648  | -0.770488 | 0.358216  |
| N | 2.572424  | -0.087795 | 0.004769  |
| N | 3.494296  | 0.487392  | -0.277586 |

eq2

```
=====
C -0.237742 -1.261150 -0.100727
C 0.258553 0.000423 -0.799078
H -0.087750 0.000590 -1.831910
C -0.238025 1.261356 -0.100007
C -1.765133 1.258668 -0.012880
H -2.104175 2.152627 0.511721
H -2.180606 1.303546 -1.023970
C -1.764783 -1.258920 -0.013750
C -2.276254 -0.000443 0.685685
H -3.366890 -0.000578 0.710539
H -1.930398 -0.000771 1.723875
H 0.182210 1.294517 0.911035
H -2.180158 -1.303187 -1.024911
H -2.103720 -2.153323 0.510173
H 0.119678 2.141776 -0.635290
H 0.120388 -2.141029 -0.636626
H 0.182416 -1.294806 0.910317
N 1.748134 0.000934 -0.931115
N 2.348284 0.000025 0.136176
N 2.973483 -0.000811 1.069165
```

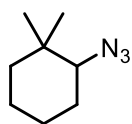

2-azido-1,1-dimethylcyclohexane

| Conformation | Electronic Energy | Enthalpy    | Gibbs Free Energy |
|--------------|-------------------|-------------|-------------------|
| ax           | -478.028464       | -477.78597  | -477.834084       |
| ax2          | -478.025567       | -477.782713 | -477.82988        |
| ax3          | -478.028783       | -477.786209 | -477.83345        |
| eq           | -478.029438       | -477.786923 | -477.834564       |
| eq2          | -478.029333       | -477.786976 | -477.83525        |
| eq3          | -478.029550       | -477.786886 | -477.834313       |

ax

```
=====
C  1.088132    0.693576    0.036642
C -0.313948    0.380183    0.591259
H -0.514651    1.045802    1.435677
C -0.473878   -1.078123    1.022586
C -0.114597   -2.046467   -0.104098
H -0.194950   -3.072787    0.255890
H -0.835985   -1.937198   -0.918937
C  1.442329   -0.315047   -1.069745
C  1.292330   -1.773926   -0.635594
H  1.506573   -2.430066   -1.480601
H  2.024731   -2.011925    0.139712
H  0.169453   -1.252925    1.886286
H  0.786367   -0.132721   -1.926121
H  2.463730   -0.119416   -1.405225
H -1.497393   -1.246516    1.365546
C  2.098281    0.618233    1.188169
H  3.092927    0.870564    0.817019
H  1.839574    1.335178    1.970169
H  2.154418   -0.368741    1.643220
C  1.128924    2.112927   -0.531191
H  0.817925    2.841650    0.221141
H  2.146713    2.358972   -0.839250
H  0.477067    2.217463   -1.397484
N -1.306494    0.716274   -0.484535
N -2.467471    0.478371   -0.193963
N -3.557739    0.284573   -0.000819
```

ax2

```
=====
C -0.836735   -0.759277   -0.059114
C  0.010084   -0.189211    1.104976
H -0.301909   -0.695382    2.017508
C -0.158159    1.320824    1.295380
C  0.054736    2.100628   -0.000814
H -0.111063    3.162780    0.183496
H  1.092154    2.002905   -0.334223
C -0.692156    0.097655   -1.333105
C -0.885015    1.595596   -1.094098
H -0.709374    2.137422   -2.024440
H -1.918057    1.798681   -0.800737
H -1.168561    1.506574    1.665720
H  0.293518   -0.063445   -1.775686
H -1.416464   -0.265381   -2.066472
H  0.531946    1.652842    2.071458
C -2.302271   -0.768228    0.397171
H -2.931965   -1.162935   -0.401849
H -2.425568   -1.408434    1.272669
H -2.669339    0.224802    0.651841
C -0.429700   -2.202961   -0.360324
H -0.466207   -2.813956    0.544101
H -1.118216   -2.634757   -1.088885
H  0.575949   -2.271385   -0.777358
```

|   |          |           |           |
|---|----------|-----------|-----------|
| N | 1.462508 | -0.538407 | 1.043364  |
| N | 2.084521 | -0.371366 | 0.007432  |
| N | 2.764179 | -0.281725 | -0.884735 |

ax3

```
=====
```

|   |           |           |           |
|---|-----------|-----------|-----------|
| C | 0.295741  | 0.974299  | 0.060831  |
| C | -0.295183 | -0.315736 | 0.675505  |
| H | -0.861483 | -0.048898 | 1.571783  |
| C | 0.770432  | -1.352716 | 1.021418  |
| C | 1.658206  | -1.679153 | -0.178602 |
| H | 2.427543  | -2.392755 | 0.119006  |
| H | 1.056401  | -2.162585 | -0.952866 |
| C | 1.221324  | 0.614953  | -1.113690 |
| C | 2.293389  | -0.413346 | -0.751985 |
| H | 2.879794  | -0.656643 | -1.639331 |
| H | 2.988651  | 0.008593  | -0.021951 |
| H | 1.381457  | -0.960421 | 1.836066  |
| H | 0.608324  | 0.211610  | -1.925311 |
| H | 1.680568  | 1.533002  | -1.488510 |
| H | 0.277628  | -2.250863 | 1.394999  |
| C | 1.064928  | 1.726013  | 1.154160  |
| H | 1.467141  | 2.654814  | 0.745780  |
| H | 0.399775  | 1.982833  | 1.981295  |
| H | 1.897109  | 1.152647  | 1.558149  |
| C | -0.827300 | 1.885242  | -0.437944 |
| H | -1.546150 | 2.096692  | 0.357787  |
| H | -0.410742 | 2.836070  | -0.774553 |
| H | -1.362199 | 1.443923  | -1.280038 |
| N | -1.236482 | -0.979425 | -0.286373 |
| N | -2.404342 | -0.642900 | -0.171076 |
| N | -3.498181 | -0.389869 | -0.122617 |

eq

```
=====
```

|   |           |           |           |
|---|-----------|-----------|-----------|
| C | 0.255855  | 0.888831  | 0.038851  |
| C | -0.270883 | -0.555008 | -0.102315 |
| H | -0.469510 | -0.733809 | -1.164179 |
| C | 0.710780  | -1.608996 | 0.391954  |
| C | 2.039675  | -1.492259 | -0.353481 |
| H | 2.745640  | -2.228325 | 0.032746  |
| H | 1.875874  | -1.728740 | -1.409244 |
| C | 1.599535  | 0.957630  | -0.711601 |
| C | 2.616230  | -0.082024 | -0.242326 |
| H | 3.525169  | -0.001063 | -0.840403 |
| H | 2.902749  | 0.115186  | 0.793302  |
| H | 0.865706  | -1.485744 | 1.466188  |
| H | 1.406334  | 0.804961  | -1.778748 |
| H | 2.004065  | 1.966806  | -0.603546 |
| H | 0.272306  | -2.596087 | 0.240852  |
| C | 0.433251  | 1.288267  | 1.506340  |
| H | 0.805384  | 2.313084  | 1.561215  |
| H | -0.519465 | 1.247455  | 2.035416  |
| H | 1.138872  | 0.649643  | 2.035370  |

|   |           |           |           |
|---|-----------|-----------|-----------|
| C | -0.730491 | 1.857430  | -0.616442 |
| H | -1.675313 | 1.897483  | -0.070540 |
| H | -0.314393 | 2.866522  | -0.624979 |
| H | -0.939965 | 1.568610  | -1.648892 |
| N | -1.551180 | -0.737719 | 0.648640  |
| N | -2.562241 | -0.566953 | -0.015606 |
| N | -3.536174 | -0.435215 | -0.560239 |

eq2

```
=====
```

|   |           |           |           |
|---|-----------|-----------|-----------|
| C | -0.733036 | -0.909615 | -0.033820 |
| C | 0.427489  | 0.075021  | -0.252665 |
| H | 0.570128  | 0.185579  | -1.333507 |
| C | 0.183547  | 1.454924  | 0.351934  |
| C | -1.096672 | 2.068678  | -0.213280 |
| H | -1.275434 | 3.040827  | 0.247417  |
| H | -0.967479 | 2.240352  | -1.286125 |
| C | -2.008708 | -0.242729 | -0.584588 |
| C | -2.287937 | 1.138452  | 0.005634  |
| H | -3.182834 | 1.559049  | -0.455541 |
| H | -2.493861 | 1.055566  | 1.075477  |
| H | 0.112149  | 1.366670  | 1.438101  |
| H | -1.904120 | -0.144804 | -1.670238 |
| H | -2.851540 | -0.914532 | -0.406556 |
| H | 1.039334  | 2.098148  | 0.134478  |
| C | -0.903318 | -1.263763 | 1.446462  |
| H | -1.748339 | -1.945147 | 1.561543  |
| H | -0.013573 | -1.764593 | 1.829124  |
| H | -1.092535 | -0.390991 | 2.069760  |
| C | -0.469489 | -2.193921 | -0.820794 |
| H | 0.414268  | -2.712205 | -0.446901 |
| H | -1.321454 | -2.870565 | -0.731750 |
| H | -0.317223 | -1.977556 | -1.880318 |
| N | 1.672929  | -0.534395 | 0.310851  |
| N | 2.697904  | 0.053640  | 0.000286  |
| N | 3.680777  | 0.539600  | -0.245175 |

eq3

```
=====
```

|   |           |           |           |
|---|-----------|-----------|-----------|
| C | 0.470276  | 0.958093  | 0.010156  |
| C | -0.240711 | -0.146301 | -0.802514 |
| H | 0.110721  | -0.070846 | -1.832608 |
| C | 0.037230  | -1.558979 | -0.297814 |
| C | 1.539041  | -1.837893 | -0.272146 |
| H | 1.720209  | -2.840567 | 0.116508  |
| H | 1.925816  | -1.814208 | -1.295229 |
| C | 1.971332  | 0.612308  | 0.042982  |
| C | 2.270214  | -0.791207 | 0.565000  |
| H | 3.345842  | -0.971636 | 0.537547  |
| H | 1.961272  | -0.878346 | 1.609839  |
| H | -0.368920 | -1.684279 | 0.709552  |
| H | 2.364791  | 0.696853  | -0.975429 |
| H | 2.484667  | 1.365989  | 0.644650  |
| H | -0.477297 | -2.271630 | -0.944835 |



|   |           |           |           |
|---|-----------|-----------|-----------|
| C | -0.096586 | 1.064632  | 1.429855  |
| H | 0.491129  | 1.783591  | 2.003525  |
| H | -1.126402 | 1.426392  | 1.413297  |
| H | -0.078756 | 0.117144  | 1.967660  |
| C | 0.294791  | 2.305648  | -0.690756 |
| H | -0.755361 | 2.596484  | -0.732724 |
| H | 0.839848  | 3.082755  | -0.151326 |
| H | 0.681330  | 2.266949  | -1.711221 |
| N | -1.707856 | 0.124362  | -0.917738 |
| N | -2.402084 | -0.329702 | -0.019811 |
| N | -3.117548 | -0.715010 | 0.756438  |

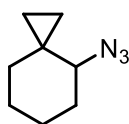

4-azidospiro[2.5]octane

| Conformation | Electronic Energy | Enthalpy    | Gibbs Free Energy |
|--------------|-------------------|-------------|-------------------|
| ax           | -476.798515       | -476.5792   | -476.625529       |
| ax2          | -476.797628       | -476.578347 | -476.625004       |
| ax3          | -476.798516       | -476.5792   | -476.625532       |
| eq           | -476.796558       | -476.577154 | -476.623098       |
| eq2          | -476.796667       | -476.577378 | -476.623794       |
| eq3          | -476.796291       | -476.576861 | -476.622742       |

ax

|   |           |           |           |
|---|-----------|-----------|-----------|
| C | -0.021504 | 0.859967  | -0.053817 |
| C | -0.095996 | -0.355220 | -0.950794 |
| H | -0.538855 | -0.077406 | -1.909861 |
| C | 0.209036  | 2.175905  | -0.738186 |
| C | -1.131975 | 1.867095  | -0.124842 |
| C | 1.286290  | -0.962593 | -1.164303 |
| C | 1.996414  | -1.237041 | 0.161702  |
| H | 1.454371  | -2.014296 | 0.707081  |
| H | 2.996939  | -1.624157 | -0.034456 |
| C | 0.680059  | 0.607232  | 1.264680  |
| C | 2.073570  | 0.023815  | 1.023595  |
| H | 2.688903  | 0.771751  | 0.514298  |
| H | 2.557900  | -0.198517 | 1.975347  |
| H | 0.277001  | 2.182150  | -1.817215 |
| H | 0.844273  | 2.888582  | -0.231428 |
| H | -1.399667 | 2.375039  | 0.791094  |
| H | -1.953942 | 1.670059  | -0.799455 |
| H | 1.867922  | -0.249079 | -1.752853 |
| H | 0.740741  | 1.540983  | 1.825899  |

|   |           |           |           |
|---|-----------|-----------|-----------|
| H | 0.091573  | -0.092775 | 1.867306  |
| H | 1.193186  | -1.876257 | -1.752669 |
| N | -0.950228 | -1.441485 | -0.364103 |
| N | -1.966054 | -1.063599 | 0.201725  |
| N | -2.911676 | -0.805064 | 0.749335  |

ax2

```
=====
```

|   |           |           |           |
|---|-----------|-----------|-----------|
| C | 1.102118  | -0.543499 | -0.074865 |
| C | -0.284881 | -0.483383 | 0.517073  |
| H | -0.397962 | -1.267099 | 1.269715  |
| C | 2.191803  | -1.019693 | 0.840568  |
| C | 1.710788  | -1.892594 | -0.292758 |
| C | -0.559435 | 0.887266  | 1.134194  |
| C | -0.278836 | 2.023018  | 0.149962  |
| H | -0.984799 | 1.966083  | -0.683810 |
| H | -0.445748 | 2.981278  | 0.642878  |
| C | 1.410012  | 0.582131  | -1.039542 |
| C | 1.149916  | 1.941635  | -0.388966 |
| H | 1.853393  | 2.084649  | 0.436980  |
| H | 1.329076  | 2.742427  | -1.107612 |
| H | 1.922153  | -1.310853 | 1.846266  |
| H | 3.160908  | -0.551486 | 0.740242  |
| H | 2.362659  | -2.012826 | -1.146574 |
| H | 1.116560  | -2.759550 | -0.038684 |
| H | 0.094626  | 0.983520  | 2.004469  |
| H | 2.447245  | 0.500907  | -1.368676 |
| H | 0.779007  | 0.478718  | -1.927509 |
| H | -1.585779 | 0.934196  | 1.504844  |
| N | -1.242375 | -0.792247 | -0.599178 |
| N | -2.420970 | -0.643719 | -0.311836 |
| N | -3.522404 | -0.526783 | -0.124202 |

ax3

```
=====
```

|   |           |           |           |
|---|-----------|-----------|-----------|
| C | -0.021774 | -0.859991 | 0.053871  |
| C | -0.095712 | 0.355026  | 0.951132  |
| H | -0.538231 | 0.077075  | 1.910331  |
| C | 0.208342  | -2.176161 | 0.737947  |
| C | -1.132675 | -1.866645 | 0.124964  |
| C | 1.286757  | 0.962218  | 1.164287  |
| C | 1.996617  | 1.236574  | -0.161875 |
| H | 1.454563  | 2.013954  | -0.707067 |
| H | 2.997270  | 1.623504  | 0.034022  |
| C | 0.679531  | -0.607167 | -1.264731 |
| C | 2.073278  | -0.024229 | -1.023889 |
| H | 2.688539  | -0.772381 | -0.514821 |
| H | 2.557422  | 0.198088  | -1.975733 |
| H | 0.276580  | -2.182607 | 1.816953  |
| H | 0.843098  | -2.889017 | 0.230839  |
| H | -1.400824 | -2.374374 | -0.790958 |
| H | -1.954412 | -1.669288 | 0.799771  |
| H | 1.868405  | 0.248645  | 1.752744  |
| H | 0.739739  | -1.540802 | -1.826211 |

|   |           |          |           |
|---|-----------|----------|-----------|
| H | 0.091128  | 0.093171 | -1.867076 |
| H | 1.193889  | 1.875915 | 1.752643  |
| N | -0.949982 | 1.441543 | 0.365075  |
| N | -1.965426 | 1.064028 | -0.201674 |
| N | -2.910785 | 0.805909 | -0.749924 |

eq

```
=====
```

|   |           |           |           |
|---|-----------|-----------|-----------|
| C | -0.297297 | 0.820930  | -0.110670 |
| C | 0.265789  | -0.591596 | -0.108846 |
| H | 0.428367  | -0.904044 | -1.145437 |
| C | -0.107339 | 1.684678  | 1.100023  |
| C | 0.612735  | 2.006096  | -0.188964 |
| C | -0.711310 | -1.553094 | 0.557157  |
| C | -2.074690 | -1.501298 | -0.132749 |
| H | -1.969136 | -1.863793 | -1.159753 |
| H | -2.766452 | -2.175482 | 0.373344  |
| C | -1.640596 | 0.881077  | -0.811055 |
| C | -2.634568 | -0.079491 | -0.158355 |
| H | -2.830539 | 0.250651  | 0.865956  |
| H | -3.585415 | -0.057646 | -0.692546 |
| H | 0.490533  | 1.299314  | 1.913423  |
| H | -0.932766 | 2.319774  | 1.389828  |
| H | 0.268604  | 2.855328  | -0.762460 |
| H | 1.681697  | 1.845930  | -0.209664 |
| H | -0.811265 | -1.266569 | 1.607994  |
| H | -2.015050 | 1.905656  | -0.784206 |
| H | -1.511556 | 0.609646  | -1.864037 |
| H | -0.301311 | -2.563121 | 0.527091  |
| N | 1.561406  | -0.675877 | 0.621979  |
| N | 2.552865  | -0.574835 | -0.088181 |
| N | 3.511149  | -0.500639 | -0.667910 |

eq2

```
=====
```

|   |           |           |           |
|---|-----------|-----------|-----------|
| C | -0.756001 | 0.819485  | -0.181647 |
| C | 0.425635  | -0.121440 | -0.303229 |
| H | 0.571838  | -0.361761 | -1.362274 |
| C | -0.834905 | 1.746304  | 0.994614  |
| C | -0.580018 | 2.289203  | -0.392855 |
| C | 0.170770  | -1.410745 | 0.475495  |
| C | -1.115887 | -2.083296 | -0.003563 |
| H | -0.995383 | -2.386544 | -1.047859 |
| H | -1.292389 | -2.990953 | 0.574480  |
| C | -2.039572 | 0.163675  | -0.652338 |
| C | -2.307496 | -1.133498 | 0.110819  |
| H | -2.482989 | -0.900113 | 1.165069  |
| H | -3.210934 | -1.612726 | -0.268703 |
| H | -0.007175 | 1.762163  | 1.689047  |
| H | -1.810422 | 1.910503  | 1.430754  |
| H | -1.385377 | 2.817085  | -0.884215 |
| H | 0.413743  | 2.658460  | -0.601243 |
| H | 0.088808  | -1.159759 | 1.536664  |
| H | -2.866058 | 0.865106  | -0.528167 |

```

H -1.959209 -0.056646 -1.721988
H 1.021466 -2.085618 0.358237
N 1.653095 0.565626 0.189477
N 2.687906 -0.040756 -0.047811
N 3.678845 -0.535917 -0.230748

```

eq3

```

=====
C -0.528256 0.904561 -0.177859
C 0.240653 -0.251741 -0.799348
H -0.074048 -0.346761 -1.840230
C 0.067934 1.648614 0.980574
C -0.064701 2.313220 -0.370160
C -0.058989 -1.557274 -0.069155
C -1.562340 -1.835436 -0.062573
H -1.905515 -1.979425 -1.091247
H -1.759090 -2.764221 0.473730
C -2.020264 0.633338 -0.152798
C -2.332405 -0.676787 0.568975
H -2.047490 -0.585116 1.621241
H -3.404600 -0.875341 0.540515
H 1.065761 1.394972 1.310583
H -0.604612 1.960808 1.767252
H -0.826553 3.071416 -0.485570
H 0.845515 2.479373 -0.927639
H 0.294366 -1.479189 0.963991
H -2.529195 1.472073 0.324832
H -2.389157 0.574227 -1.182181
H 0.484700 -2.374763 -0.546174
N 1.700293 0.036618 -0.894949
N 2.391610 -0.385185 0.022089
N 3.108118 -0.739864 0.810712

```

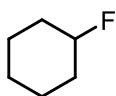

fluorocyclohexane

| Conformation | Electronic Energy | Enthalpy    | Gibbs Free Energy |
|--------------|-------------------|-------------|-------------------|
| ax           | -335.086737       | -334.915951 | -334.953331       |
| eq           | -335.087173       | -334.916381 | -334.953819       |

ax

```

=====
C 0.959090 1.456544 -0.000000
C 0.282135 0.912809 -1.257890
C 0.282135 -0.616113 -1.264236
C -0.329603 -1.185503 0.000000
C 0.282135 -0.616113 1.264236

```

|   |           |           |           |
|---|-----------|-----------|-----------|
| C | 0.282135  | 0.912809  | 1.257890  |
| H | -0.255567 | -1.007764 | -2.128860 |
| H | -0.748518 | 1.275026  | -1.296647 |
| H | 0.782547  | 1.282636  | -2.153496 |
| H | 2.012160  | 1.157612  | -0.000000 |
| H | 0.935478  | 2.547222  | -0.000000 |
| H | -0.286593 | -2.274211 | 0.000000  |
| H | -0.255567 | -1.007764 | 2.128860  |
| H | 1.308901  | -0.986897 | 1.324460  |
| H | -0.748518 | 1.275026  | 1.296647  |
| H | 0.782547  | 1.282636  | 2.153496  |
| H | 1.308901  | -0.986897 | -1.324460 |
| F | -1.709325 | -0.860358 | 0.000000  |

eq

```
=====
```

|   |           |           |           |
|---|-----------|-----------|-----------|
| C | 1.840621  | 0.000001  | -0.285856 |
| C | 1.134721  | 1.259645  | 0.215737  |
| C | -0.343348 | 1.256855  | -0.182644 |
| C | -1.012150 | -0.000001 | 0.327776  |
| C | -0.343347 | -1.256857 | -0.182644 |
| C | 1.134722  | -1.259643 | 0.215735  |
| H | -0.857316 | 2.133528  | 0.213389  |
| H | 1.213531  | 1.305971  | 1.305923  |
| H | 1.618997  | 2.153897  | -0.177059 |
| H | 1.841050  | 0.000003  | -1.380001 |
| H | 2.882869  | -0.000003 | 0.036257  |
| H | -1.042635 | -0.000002 | 1.419879  |
| H | -0.857309 | -2.133530 | 0.213396  |
| H | -0.433989 | -1.275636 | -1.272445 |
| H | 1.213530  | -1.305970 | 1.305922  |
| H | 1.619003  | -2.153894 | -0.177059 |
| H | -0.433985 | 1.275632  | -1.272446 |
| F | -2.359007 | 0.000001  | -0.096042 |

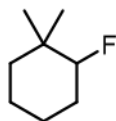

2-fluoro-1,1-dimethylcyclohexane

| Conformation | Electronic Energy | Enthalpy    | Gibbs Free Energy |
|--------------|-------------------|-------------|-------------------|
| ax           | -413.702000       | -413.472499 | -413.515448       |
| eq           | -413.702292       | -413.472845 | -413.515917       |

ax

```
=====
C -1.342456 -1.354618 -0.509886
C -2.087066 -0.076493 -0.126436
C -1.315418 0.713125 0.931276
C 0.105737 0.999939 0.486491
C 0.895698 -0.236704 0.051664
C 0.077571 -1.034523 -0.978749
H -1.808065 1.662093 1.148195
H -2.214952 0.545034 -1.016397
H -3.085394 -0.310062 0.245065
H -1.312211 -2.030369 0.348434
H -1.879490 -1.877918 -1.302432
H 0.658951 1.541592 1.256328
H 0.018816 -0.449429 -1.901281
H 0.619417 -1.952345 -1.219494
H -1.276672 0.151990 1.867043
C 2.223849 0.198292 -0.569171
H 2.808761 0.790872 0.137963
H 2.812162 -0.679935 -0.841203
H 2.067562 0.793367 -1.468276
C 1.197218 -1.085089 1.292132
H 1.810040 -1.941787 1.006903
H 1.755606 -0.503412 2.028594
H 0.298215 -1.463986 1.775371
F 0.021829 1.886747 -0.614304
```

eq

```
=====
C -1.802392 -1.042472 0.154816
C -2.154207 0.389674 -0.245916
C -1.047304 1.360898 0.168683
C 0.276142 0.913752 -0.414199
C 0.702078 -0.498811 -0.014314
C -0.444119 -1.446191 -0.418353
H -1.264338 2.370036 -0.183990
H -2.282229 0.436187 -1.331473
H -3.100688 0.694916 0.200749
H -1.790379 -1.124133 1.244190
H -2.569318 -1.730540 -0.203959
H 0.238941 0.975724 -1.505403
H -0.514367 -1.456179 -1.511110
H -0.178959 -2.459801 -0.108918
H -0.968301 1.401192 1.257123
C 1.967204 -0.881228 -0.783686
H 2.800842 -0.228722 -0.520898
H 2.255413 -1.907527 -0.548813
H 1.803797 -0.812602 -1.861019
C 0.987975 -0.590902 1.487476
H 1.293474 -1.608605 1.737162
H 1.799942 0.081162 1.766936
H 0.120998 -0.344288 2.098280
F 1.271434 1.831651 -0.015100
```

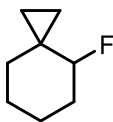

4-fluorospiro[2.5]octane

| Conformation | Electronic Energy | Enthalpy    | Gibbs Free Energy |
|--------------|-------------------|-------------|-------------------|
| ax           | -412.470798       | -412.264529 | -412.305956       |
| eq           | -412.469375       | -412.263069 | -412.304281       |

ax

|   |           |           |           |
|---|-----------|-----------|-----------|
| C | -0.837525 | -0.136615 | -0.059061 |
| C | -0.034057 | 1.087625  | 0.272020  |
| H | -0.612509 | 1.773884  | 0.891320  |
| C | -1.807097 | -0.587262 | 0.995676  |
| C | -2.308881 | 0.035062  | -0.281506 |
| C | 1.299089  | 0.753097  | 0.912021  |
| C | 2.075696  | -0.283155 | 0.098540  |
| H | 2.357116  | 0.149214  | -0.865260 |
| H | 3.001307  | -0.534745 | 0.617137  |
| C | -0.074510 | -1.184398 | -0.842700 |
| C | 1.235714  | -1.538555 | -0.138350 |
| H | 1.011695  | -2.010238 | 0.823391  |
| H | 1.796534  | -2.262853 | -0.730471 |
| H | -1.882817 | -0.003187 | 1.902281  |
| H | -1.932665 | -1.653301 | 1.122445  |
| H | -2.777195 | -0.614857 | -1.007137 |
| H | -2.714646 | 1.035560  | -0.225861 |
| H | 1.090464  | 0.359632  | 1.910404  |
| H | -0.702103 | -2.067940 | -0.969836 |
| H | 0.146136  | -0.797923 | -1.842208 |
| H | 1.874753  | 1.671157  | 1.036497  |
| F | 0.228151  | 1.786756  | -0.933615 |

eq

|   |           |           |           |
|---|-----------|-----------|-----------|
| C | -0.627292 | -0.464998 | -0.178879 |
| C | -0.203658 | 0.957924  | -0.446903 |
| H | -0.055942 | 1.104769  | -1.520280 |
| C | -1.483625 | -0.739756 | 1.020341  |
| C | -2.055564 | -0.859470 | -0.374084 |
| C | 1.053534  | 1.319343  | 0.315817  |
| C | 2.179029  | 0.342220  | -0.033114 |
| H | 2.432253  | 0.448995  | -1.092132 |
| H | 3.073620  | 0.596241  | 0.535657  |
| C | 0.476823  | -1.446023 | -0.518543 |
| C | 1.759654  | -1.102687 | 0.239637  |

|   |           |           |           |
|---|-----------|-----------|-----------|
| H | 1.588259  | -1.232769 | 1.312115  |
| H | 2.559263  | -1.787474 | -0.045776 |
| H | -1.811538 | 0.100036  | 1.615838  |
| H | -1.291622 | -1.651558 | 1.568485  |
| H | -2.248112 | -1.851625 | -0.757699 |
| H | -2.754876 | -0.096755 | -0.685329 |
| H | 0.831607  | 1.266261  | 1.385210  |
| H | 0.142533  | -2.457843 | -0.284225 |
| H | 0.673157  | -1.410474 | -1.595200 |
| H | 1.339624  | 2.345009  | 0.079996  |
| F | -1.230181 | 1.843097  | -0.073588 |

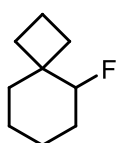

5-fluorospiro[3.5]nonane

| Conformation | Electronic Energy | Enthalpy    | Gibbs Free Energy |
|--------------|-------------------|-------------|-------------------|
| ax           | -451.775798       | -451.539227 | -451.582671       |
| ax2          | -451.775750       | -451.539127 | -451.582518       |
| eq           | -451.776194       | -451.539679 | -451.583074       |
| eq2          | -451.775613       | -451.539132 | -451.582544       |

ax

|   |           |           |           |
|---|-----------|-----------|-----------|
| C | 0.601651  | 0.063356  | -0.062163 |
| C | -0.412920 | 1.082088  | 0.409101  |
| H | 0.051556  | 1.787021  | 1.100358  |
| C | 1.926973  | 0.636389  | -0.619735 |
| C | 1.421836  | -0.602776 | 1.075793  |
| C | -1.653609 | 0.456004  | 1.011835  |
| C | -2.292156 | -0.554322 | 0.058758  |
| H | -3.150717 | -1.022928 | 0.540815  |
| H | -2.667211 | -0.031344 | -0.824676 |
| C | -0.046219 | -0.953696 | -1.001796 |
| C | -1.274760 | -1.609923 | -0.371718 |
| H | -1.727428 | -2.308171 | -1.077072 |
| H | -0.970142 | -2.192697 | 0.502571  |
| H | 2.096633  | 1.655638  | -0.271120 |
| H | 1.430063  | 0.013566  | 1.975578  |
| H | -1.351397 | -0.044945 | 1.936094  |
| H | -0.341508 | -0.440464 | -1.921944 |
| H | 0.693790  | -1.707410 | -1.280916 |
| H | -2.356284 | 1.244316  | 1.285182  |
| C | 2.699422  | -0.397521 | 0.230565  |
| H | 3.587463  | -0.048586 | 0.752156  |



|   |           |           |           |
|---|-----------|-----------|-----------|
| H | 2.056014  | 0.600265  | -1.700775 |
| H | 2.953375  | -1.287085 | -0.342628 |
| H | 1.150799  | -1.622670 | 1.344344  |
| F | -0.808479 | 1.854212  | -0.711313 |

ax2

```
=====
```

|   |           |           |           |
|---|-----------|-----------|-----------|
| C | 0.338916  | -1.073143 | -1.017134 |
| H | -0.213136 | -1.963508 | -1.324860 |
| C | 1.592775  | -1.456845 | -0.232007 |
| C | 2.348824  | -0.206501 | 0.214367  |
| H | 3.231556  | -0.476098 | 0.795110  |
| H | 2.699158  | 0.336264  | -0.667388 |
| C | 0.158724  | 1.038662  | 0.315823  |
| C | 1.444762  | 0.702908  | 1.045889  |
| H | 1.952000  | 1.631559  | 1.311068  |
| H | 1.177090  | 0.203234  | 1.979966  |
| H | 1.303005  | -2.037829 | 0.649780  |
| H | -0.494290 | 1.655816  | 0.935825  |
| H | 2.236708  | -2.095390 | -0.838163 |
| C | -0.584638 | -0.183274 | -0.196083 |
| C | -1.945115 | 0.200066  | -0.828949 |
| C | -1.368922 | -0.857375 | 0.964925  |
| C | -2.634316 | -0.087971 | 0.523723  |
| H | -2.232741 | -0.523513 | -1.591634 |
| H | -2.031025 | 1.205352  | -1.238759 |
| H | -1.461782 | -1.929428 | 0.791648  |
| H | -1.007783 | -0.690948 | 1.979062  |
| H | -3.567370 | -0.645611 | 0.495600  |
| H | -2.783528 | 0.818375  | 1.107578  |
| H | 0.628460  | -0.543248 | -1.930200 |
| F | 0.495291  | 1.843980  | -0.799774 |

eq

```
=====
```

|   |           |           |           |
|---|-----------|-----------|-----------|
| C | 0.510653  | -0.136696 | -0.224779 |
| C | -0.390882 | 1.063256  | -0.417880 |
| H | -0.617594 | 1.185580  | -1.481032 |
| C | 1.908322  | -0.073938 | -0.885912 |
| C | 1.212299  | -0.269598 | 1.154510  |
| C | -1.664934 | 0.969694  | 0.393076  |
| C | -2.441168 | -0.287813 | -0.002169 |
| H | -3.348231 | -0.366448 | 0.597373  |
| H | -2.753339 | -0.203497 | -1.047322 |
| C | -0.266602 | -1.395891 | -0.616295 |
| C | -1.571987 | -1.533278 | 0.166421  |
| H | -2.112908 | -2.420803 | -0.164682 |
| H | -1.348586 | -1.673765 | 1.227597  |
| H | 2.225703  | 0.954142  | -1.055506 |
| H | 1.300161  | 0.694747  | 1.653396  |
| H | -1.398127 | 0.925879  | 1.453192  |
| H | -0.489732 | -1.348616 | -1.687499 |

|   |           |           |           |
|---|-----------|-----------|-----------|
| H | 0.369867  | -2.270202 | -0.462243 |
| H | -2.263378 | 1.867667  | 0.235562  |
| C | 2.514618  | -0.650553 | 0.413924  |
| H | 3.436437  | -0.198285 | 0.771980  |
| H | 2.035602  | -0.649333 | -1.802495 |
| H | 2.648693  | -1.729051 | 0.356971  |
| H | 0.797400  | -0.998033 | 1.849619  |
| F | 0.295124  | 2.235436  | -0.036698 |

eq2

```

=====
C  0.603135   -1.443674   -0.553733
H  0.840706   -1.393373   -1.622221
C  1.881807   -1.253737    0.260767
C  2.472789    0.134174    0.018724
H  3.364288    0.287218    0.627208
H  2.780024    0.216883   -1.027997
C  0.179683    0.984916   -0.470619
C  1.441846    1.220190    0.330650
H  1.833645    2.212144    0.102510
H  1.190256    1.197678    1.394194
H  1.651624   -1.367256    1.324779
H  0.375221    1.106497   -1.539953
H  2.608661   -2.026226    0.006391
C -0.439024   -0.378016   -0.226502
C -1.822779   -0.543981   -0.903424
C -1.135075   -0.498775    1.159192
C -2.508504   -0.338821    0.467231
H -1.956396   -1.553150   -1.292497
H -2.064618    0.174684   -1.685941
H -0.992674   -1.490346    1.588580
H -0.876410    0.250432    1.905687
H -3.273949   -1.062510    0.738237
H -2.911605    0.664798    0.580598
H  0.167318   -2.427287   -0.368618
F -0.753262    1.990683   -0.136074

```

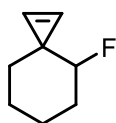

4-fluorospiro[2.5]oct-1-ene

| Conformation | Electronic Energy | Enthalpy    | Gibbs Free Energy |
|--------------|-------------------|-------------|-------------------|
| ax           | -411.200533       | -411.019743 | -411.061205       |
| eq           | -411.200139       | -411.0193   | -411.060592       |

ax

```
=====
C  -0.900475    -0.141906    -0.049807
C  -0.079143     1.081468     0.283417
H  -0.655789     1.773958     0.895904
C  -1.972039    -0.561274     0.919840
C  -2.392452    -0.020022    -0.171405
C   1.249423     0.741969     0.930670
C   2.030951    -0.290779     0.118769
H   2.322847     0.146851    -0.839477
H   2.951099    -0.548931     0.644116
C  -0.117693    -1.178307    -0.844196
C   1.188688    -1.540645    -0.134080
H   0.957232    -2.019610     0.822444
H   1.751952    -2.262409    -0.727356
H  -2.172579    -1.038441     1.863377
H  -3.205075     0.286708    -0.806593
H   1.032089     0.344093     1.925727
H  -0.738843    -2.062080    -0.992150
H   0.116003    -0.775146    -1.834677
H   1.825926     1.658469     1.065056
F   0.196842     1.772612    -0.926180
```

eq

```
=====
C  -0.665565    -0.509289    -0.177547
C  -0.260516     0.930656    -0.443803
H  -0.098120     1.079362    -1.515185
C  -1.617264    -0.815545     0.940152
C  -2.099370    -0.925506    -0.253080
C   0.979979     1.315322     0.336663
C   2.132960     0.369041    -0.004662
H   2.396985     0.490360    -1.059450
H   3.014301     0.639471     0.577385
C   0.476675    -1.454437    -0.524070
C   1.744209    -1.086941     0.251050
H   1.563577    -1.229730     1.320624
H   2.563816    -1.750366    -0.028917
H  -1.755315    -0.890026     2.005063
H  -2.929139    -1.158160    -0.898288
H   0.745745     1.247585     1.403041
H   0.171246    -2.479008    -0.310107
H   0.685763    -1.392839    -1.597767
H   1.245139     2.349913     0.114775
F  -1.305627     1.794848    -0.084377
```

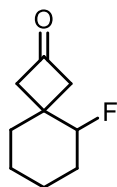

5-fluorospiro[3.5]nonan-2-one

| Conformation | Electronic Energy | Enthalpy    | Gibbs Free Energy |
|--------------|-------------------|-------------|-------------------|
| ax           | -525.803450       | -525.586057 | -525.631901       |
| ax2          | -525.803208       | -525.585831 | -525.631918       |
| eq           | -525.803740       | -525.586367 | -525.632054       |
| eq2          | -525.803554       | -525.586207 | -525.631918       |

ax

|   |           |           |           |
|---|-----------|-----------|-----------|
| C | 0.304976  | 0.116336  | -0.113498 |
| C | -0.739528 | 1.056326  | 0.449745  |
| H | -0.282547 | 1.751293  | 1.156011  |
| C | 1.559309  | 0.816420  | -0.709926 |
| C | 1.196610  | -0.545797 | 0.981972  |
| C | -1.916988 | 0.331752  | 1.069279  |
| C | -2.531528 | -0.677236 | 0.099216  |
| H | -3.340526 | -1.214773 | 0.594378  |
| H | -2.972085 | -0.144236 | -0.747089 |
| C | -0.316038 | -0.900746 | -1.067841 |
| C | -1.473119 | -1.653289 | -0.412776 |
| H | -1.912873 | -2.351840 | -1.125440 |
| H | -1.094382 | -2.246846 | 0.424864  |
| H | 1.649662  | 1.860381  | -0.402149 |
| H | 1.152321  | -0.028483 | 1.942982  |
| H | -1.552460 | -0.184434 | 1.961726  |
| H | -0.678304 | -0.371857 | -1.953762 |
| H | 0.459023  | -1.594062 | -1.404365 |
| H | -2.652635 | 1.066941  | 1.397578  |
| H | 1.724995  | 0.730516  | -1.782841 |
| H | 1.099922  | -1.619265 | 1.136326  |
| F | -1.220219 | 1.851029  | -0.615601 |
| C | 2.399554  | -0.082994 | 0.177997  |
| O | 3.560297  | -0.384654 | 0.187146  |

ax2

|   |           |           |           |
|---|-----------|-----------|-----------|
| C | -0.651542 | -1.018024 | 1.071296  |
| H | -0.087319 | -1.870932 | 1.453762  |
| C | -1.834693 | -1.482057 | 0.223537  |
| C | -2.599100 | -0.283021 | -0.335729 |
| H | -3.429262 | -0.613979 | -0.960179 |
| H | -3.027964 | 0.289042  | 0.490918  |
| C | -0.456653 | 1.042703  | -0.351131 |

|   |           |           |           |
|---|-----------|-----------|-----------|
| C | -1.672341 | 0.618426  | -1.150931 |
| H | -2.192085 | 1.511457  | -1.499853 |
| H | -1.318358 | 0.083112  | -2.035402 |
| H | -1.467336 | -2.095482 | -0.605606 |
| H | 0.221359  | 1.650301  | -0.954622 |
| H | -2.496634 | -2.111837 | 0.818917  |
| C | 0.288061  | -0.124630 | 0.272298  |
| C | 1.576083  | 0.339888  | 1.011461  |
| C | 1.164008  | -0.847619 | -0.799407 |
| H | 1.781478  | -0.244052 | 1.910690  |
| H | 1.678354  | 1.401676  | 1.231796  |
| H | 1.191583  | -1.929660 | -0.658921 |
| H | 0.988371  | -0.619110 | -1.850240 |
| H | -1.018808 | -0.459694 | 1.937221  |
| F | -0.894527 | 1.882110  | 0.697416  |
| C | 2.373065  | -0.175622 | -0.172408 |
| O | 3.513254  | -0.043763 | -0.521143 |

eq

```
=====
```

|   |           |           |           |
|---|-----------|-----------|-----------|
| C | -0.228099 | -0.043014 | 0.303702  |
| C | 0.808062  | 1.058141  | 0.385590  |
| H | 1.114381  | 1.193562  | 1.426126  |
| C | -1.556954 | 0.219212  | 1.067669  |
| C | -1.019205 | -0.127384 | -1.039177 |
| C | 2.007502  | 0.788743  | -0.495706 |
| C | 2.656592  | -0.538933 | -0.100468 |
| H | 3.507953  | -0.740561 | -0.750470 |
| H | 3.042587  | -0.460816 | 0.920017  |
| C | 0.418705  | -1.373221 | 0.689956  |
| C | 1.642617  | -1.680041 | -0.171108 |
| H | 2.099832  | -2.614985 | 0.154517  |
| H | 1.331232  | -1.820686 | -1.210072 |
| H | -1.723231 | 1.277994  | 1.274524  |
| H | -0.987557 | 0.803181  | -1.608892 |
| H | 1.670447  | 0.745243  | -1.535505 |
| H | 0.714799  | -1.323743 | 1.742398  |
| H | -0.326124 | -2.168564 | 0.604751  |
| H | 2.714059  | 1.614408  | -0.406570 |
| H | -1.755841 | -0.373982 | 1.959029  |
| H | -0.828020 | -0.973847 | -1.696617 |
| F | 0.222966  | 2.277017  | -0.007275 |
| C | -2.282247 | -0.193680 | -0.199923 |
| O | -3.407882 | -0.538663 | -0.431372 |

eq2

```
=====
```

|   |           |           |           |
|---|-----------|-----------|-----------|
| C | -0.895992 | -1.451186 | 0.548919  |
| H | -1.208491 | -1.409955 | 1.597277  |
| C | -2.113975 | -1.263756 | -0.353932 |
| C | -2.729022 | 0.120800  | -0.152483 |
| H | -3.576625 | 0.267107  | -0.821904 |
| H | -3.109208 | 0.200727  | 0.870033  |
| C | -0.488186 | 0.993959  | 0.499298  |

|   |           |           |           |
|---|-----------|-----------|-----------|
| C | -1.688818 | 1.216972  | -0.392443 |
| H | -2.105406 | 2.205244  | -0.195493 |
| H | -1.359198 | 1.194597  | -1.434476 |
| H | -1.808965 | -1.375077 | -1.399079 |
| H | -0.757607 | 1.121738  | 1.550699  |
| H | -2.852348 | -2.040156 | -0.150968 |
| C | 0.149240  | -0.369239 | 0.304432  |
| C | 1.482836  | -0.514011 | 1.092266  |
| C | 0.935824  | -0.471490 | -1.040937 |
| H | 1.626711  | -1.524159 | 1.480585  |
| H | 1.702808  | 0.217753  | 1.868359  |
| H | 0.862613  | -1.464590 | -1.488439 |
| H | 0.772583  | 0.289307  | -1.802191 |
| H | -0.436050 | -2.427962 | 0.387580  |
| F | 0.475653  | 1.986255  | 0.222318  |
| C | 2.210392  | -0.331763 | -0.227739 |
| O | 3.349315  | -0.089073 | -0.515892 |

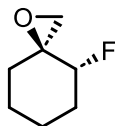

(3*S*,4*R*)-4-fluoro-1-oxaspiro[2.5]octane

| Conformation | Electronic Energy | Enthalpy    | Gibbs Free Energy |
|--------------|-------------------|-------------|-------------------|
| ax           | -448.376830       | -448.194543 | -448.235731       |
| eq           | -448.377355       | -448.194976 | -448.235964       |

ax

|   |           |           |           |
|---|-----------|-----------|-----------|
| C | -0.853822 | -0.125843 | -0.093232 |
| C | -0.052470 | 1.110604  | 0.236375  |
| H | -0.649648 | 1.794817  | 0.838210  |
| C | -2.313493 | -0.036873 | -0.122690 |
| C | 1.260670  | 0.764759  | 0.906488  |
| C | 2.043219  | -0.282392 | 0.112477  |
| H | 2.340143  | 0.138089  | -0.851720 |
| H | 2.959274  | -0.533846 | 0.647060  |
| C | -0.099806 | -1.188991 | -0.848603 |
| C | 1.199749  | -1.536470 | -0.118766 |
| H | 0.958832  | -1.993279 | 0.845243  |
| H | 1.761352  | -2.273290 | -0.693272 |
| H | -2.868996 | -0.762597 | -0.704178 |
| H | -2.794888 | 0.919274  | 0.044897  |
| H | 1.023246  | 0.375242  | 1.900116  |
| H | -0.741145 | -2.062855 | -0.964047 |
| H | 0.130176  | -0.808373 | -1.847054 |
| H | 1.839501  | 1.678734  | 1.043953  |

```
F  0.221306    1.767654   -0.978777
O -1.631735   -0.576195    1.014686
```

eq

```
=====
C  -0.612334   -0.479004   -0.136564
C  -0.236797    0.952186   -0.428118
H  -0.116941    1.080353   -1.506941
C  -1.603225   -0.782014    0.897480
C   1.028864    1.338810    0.310696
C   2.166368    0.375579   -0.033217
H   2.405944    0.463111   -1.096685
H   3.061468    0.656928    0.521201
C   0.493084   -1.452193   -0.463859
C   1.774302   -1.068468    0.278571
H   1.611699   -1.174938    1.354729
H   2.579740   -1.749302    0.003220
H  -2.091714    0.023684    1.429518
H  -1.547078   -1.736085    1.407708
H   0.819657    1.299189    1.383304
H   0.165558   -2.459482   -0.207124
H   0.673154   -1.424763   -1.542758
H   1.291383    2.365576    0.055640
F  -1.274675    1.805539   -0.041760
O  -1.930296   -0.862937   -0.496987
```

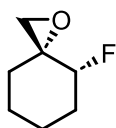

(3*R*,4*R*)-4-fluoro-1-oxaspiro[2.5]octane

| Conformation | Electronic Energy | Enthalpy    | Gibbs Free Energy |
|--------------|-------------------|-------------|-------------------|
| ax           | -448.377929       | -448.1956   | -448.236644       |
| eq           | -448.376920       | -448.194522 | -448.235436       |

ax

```
=====
C  -0.835590   -0.145488   -0.028326
C  -0.041188    1.095744    0.265729
H  -0.631422    1.801249    0.849268
C  -1.895629   -0.518641    0.911649
C   1.278587    0.757727    0.929908
C   2.056578   -0.288558    0.129474
H   2.351866    0.137283   -0.832535
H   2.973552   -0.544055    0.660600
C  -0.096663   -1.192591   -0.820009
C   1.214016   -1.541902   -0.109122
```

|   |           |           |           |
|---|-----------|-----------|-----------|
| H | 0.985112  | -2.012248 | 0.851685  |
| H | 1.772495  | -2.268067 | -0.699784 |
| H | -2.101308 | 0.108841  | 1.770739  |
| H | -2.158900 | -1.565298 | 1.005233  |
| H | 1.052622  | 0.372165  | 1.927539  |
| H | -0.733143 | -2.069159 | -0.939007 |
| H | 0.118323  | -0.796334 | -1.815851 |
| H | 1.856614  | 1.673726  | 1.054805  |
| F | 0.229192  | 1.731496  | -0.964529 |
| O | -2.203652 | 0.072585  | -0.353469 |

eq

```
=====
```

|   |           |           |           |
|---|-----------|-----------|-----------|
| C | -0.616984 | -0.496980 | -0.219104 |
| C | -0.267774 | 0.951066  | -0.463915 |
| H | -0.099512 | 1.101677  | -1.532498 |
| C | -2.008006 | -0.942191 | -0.181224 |
| C | 0.955898  | 1.348808  | 0.335181  |
| C | 2.129167  | 0.429946  | -0.016774 |
| H | 2.393194  | 0.569600  | -1.069101 |
| H | 3.001819  | 0.711276  | 0.572289  |
| C | 0.518155  | -1.431000 | -0.559612 |
| C | 1.772136  | -1.037032 | 0.224838  |
| H | 1.588454  | -1.193105 | 1.291150  |
| H | 2.604431  | -1.682009 | -0.057448 |
| H | -2.230483 | -1.976336 | -0.415774 |
| H | -2.805491 | -0.228037 | -0.340414 |
| H | 0.714910  | 1.258008  | 1.397517  |
| H | 0.213414  | -2.453371 | -0.336261 |
| H | 0.717683  | -1.366814 | -1.632580 |
| H | 1.197794  | 2.391746  | 0.130286  |
| F | -1.343944 | 1.767001  | -0.104583 |
| O | -1.262034 | -0.746418 | 1.027219  |

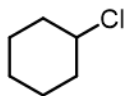

chlorocyclohexane

| Conformation | Electronic Energy | Enthalpy    | Gibbs Free Energy |
|--------------|-------------------|-------------|-------------------|
| ax           | -695.447724       | -695.277987 | -695.316442       |
| eq           | -695.448482       | -695.278753 | -695.317453       |



ax

|    |           |           |           |
|----|-----------|-----------|-----------|
| C  | 1.279217  | -1.582207 | 0.000000  |
| C  | 0.609094  | -1.035047 | 1.260452  |
| C  | 0.609094  | 0.492546  | 1.263834  |
| C  | 0.002919  | 1.080431  | -0.000000 |
| C  | 0.609094  | 0.492546  | -1.263834 |
| C  | 0.609094  | -1.035047 | -1.260452 |
| H  | 0.098370  | 0.888082  | 2.141413  |
| H  | -0.419997 | -1.399489 | 1.311923  |
| H  | 1.120442  | -1.398088 | 2.152629  |
| H  | 2.334308  | -1.290952 | 0.000000  |
| H  | 1.247990  | -2.672639 | 0.000000  |
| H  | 0.078820  | 2.163330  | -0.000000 |
| H  | 0.098370  | 0.888082  | -2.141413 |
| H  | 1.642327  | 0.852722  | -1.300259 |
| H  | -0.419997 | -1.399489 | -1.311923 |
| H  | 1.120442  | -1.398088 | -2.152629 |
| H  | 1.642327  | 0.852722  | 1.300259  |
| Cl | -1.814969 | 0.790263  | -0.000000 |

eq

|    |           |           |           |
|----|-----------|-----------|-----------|
| C  | 0.837354  | -2.100682 | 0.000000  |
| C  | 0.167765  | -1.550426 | 1.258110  |
| C  | 0.167765  | -0.018488 | 1.260308  |
| C  | -0.505080 | 0.492038  | -0.000000 |
| C  | 0.167765  | -0.018488 | -1.260308 |
| C  | 0.167765  | -1.550426 | -1.258110 |
| H  | -0.345553 | 0.366691  | 2.141166  |
| H  | -0.864310 | -1.909823 | 1.305226  |
| H  | 0.673774  | -1.912667 | 2.153565  |
| H  | 1.893140  | -1.813653 | 0.000000  |
| H  | 0.800677  | -3.190897 | 0.000000  |
| H  | -1.562093 | 0.231932  | -0.000000 |
| H  | -0.345553 | 0.366691  | -2.141166 |
| H  | 1.196699  | 0.350139  | -1.283657 |
| H  | -0.864310 | -1.909823 | -1.305226 |
| H  | 0.673774  | -1.912667 | -2.153565 |
| H  | 1.196699  | 0.350139  | 1.283657  |
| Cl | -0.498409 | 2.321339  | -0.000000 |

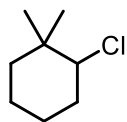

2-chloro-1,1-dimethylcyclohexane

| Conformation | Electronic Energy | Enthalpy    | Gibbs Free Energy |
|--------------|-------------------|-------------|-------------------|
| ax           | -774.061730       | -773.833265 | -773.877184       |
| eq           | -774.063144       | -773.834771 | -773.879034       |

ax

```
=====  
C  1.729420    -1.001340    -0.777546  
C  0.768349    -1.979060    -0.101591  
C  0.084867    -1.339241     1.105822  
C -0.596764    -0.022443     0.758597  
C  0.321083     0.979508     0.038057  
C  1.016588     0.298934    -1.152174  
H -0.644224    -2.017206     1.548582  
H  0.009352    -2.294955    -0.821559  
H  1.298868    -2.877222     0.216415  
H  2.566114    -0.789969    -0.107351  
H  2.153600    -1.455613    -1.674220  
H -1.024128     0.441196     1.644880  
H  0.264274     0.083185    -1.916350  
H  1.721257     1.008364    -1.592358  
H  0.828071    -1.127144     1.877970  
C -0.456332     2.203820    -0.444869  
H -1.032339     2.646056     0.371263  
H  0.240809     2.957678    -0.814421  
H -1.142955     1.953460    -1.251918  
C  1.356039     1.467463     1.066095  
H  2.021685     2.189169     0.590245  
H  0.858334     1.966775     1.899751  
H  1.968988     0.665139     1.471176  
C1 -2.083953    -0.411457    -0.258615
```

eq

```
=====  
C  2.367755    -0.030908     0.160081  
C  1.871449    -1.417521    -0.241198  
C  0.409083    -1.615309     0.163574  
C -0.445256    -0.505324    -0.425038  
C -0.022969     0.913015    -0.013780  
C  1.461338     1.050653    -0.423219  
H  0.042187    -2.577191    -0.193965  
H  1.959665    -1.530785    -1.325678  
H  2.483727    -2.196744     0.213870  
H  2.394689     0.047742     1.249473  
H  3.389221     0.119572    -0.192364  
H -0.432550    -0.570143    -1.512520  
H  1.521660     1.009338    -1.515607  
H  1.802583     2.043821    -0.123191  
H  0.316593    -1.613753     1.251256  
C -0.833466     1.953424    -0.786441  
H -1.884711     1.932917    -0.498886  
H -0.446595     2.953051    -0.580673  
H -0.767739     1.778687    -1.862325  
C -0.189087     1.163785     1.486857  
H  0.199419     2.153865     1.731779  
H -1.241284     1.137242     1.770174  
H  0.342878     0.436354     2.098144  
C1 -2.199578    -0.834992    -0.002030
```

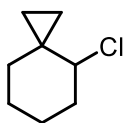

4-chlorospiro[2.5]octane

| Conformation | Electronic Energy | Enthalpy    | Gibbs Free Energy |
|--------------|-------------------|-------------|-------------------|
| ax           | -772.832315       | -772.627086 | -772.669498       |
| eq           | -772.829456       | -772.624259 | -772.666609       |

ax

| C  | 0.948546  | -0.001076 | -0.040919 |
|----|-----------|-----------|-----------|
| C  | -0.203553 | -0.640255 | 0.681131  |
| H  | 0.149393  | -1.283771 | 1.482054  |
| C  | 2.146401  | 0.307558  | 0.819436  |
| C  | 2.204665  | -0.795226 | -0.206257 |
| C  | -1.202642 | 0.385608  | 1.193387  |
| C  | -1.621994 | 1.384341  | 0.116063  |
| H  | -2.197999 | 0.867685  | -0.655920 |
| H  | -2.280034 | 2.133778  | 0.556782  |
| C  | 0.551222  | 1.006033  | -1.098587 |
| C  | -0.403096 | 2.052457  | -0.521181 |
| H  | 0.124172  | 2.638744  | 0.237472  |
| H  | -0.718236 | 2.744830  | -1.302776 |
| H  | 2.111535  | 0.020619  | 1.860973  |
| H  | 2.675898  | 1.226208  | 0.609613  |
| H  | 2.783818  | -0.620711 | -1.101974 |
| H  | 2.204205  | -1.814261 | 0.155099  |
| H  | -0.697814 | 0.920387  | 2.004192  |
| H  | 1.449718  | 1.478157  | -1.498635 |
| H  | 0.062394  | 0.486258  | -1.927846 |
| H  | -2.065785 | -0.119259 | 1.625911  |
| Cl | -1.065798 | -1.816194 | -0.453140 |

eq

|   |           |           |           |
|---|-----------|-----------|-----------|
| C | -0.009834 | 0.846920  | -0.175037 |
| C | 0.407070  | -0.585492 | -0.438700 |
| H | 0.343359  | -0.790324 | -1.506706 |
| C | 0.498732  | 1.583896  | 1.026567  |
| C | 0.926486  | 1.996595  | -0.363684 |
| C | -0.456266 | -1.567137 | 0.337731  |
| C | -1.930378 | -1.368506 | -0.025299 |
| H | -2.075946 | -1.617985 | -1.080347 |
| H | -2.541215 | -2.060752 | 0.554926  |
| C | -1.470846 | 1.044368  | -0.546242 |
| C | -2.370337 | 0.073766  | 0.217181  |
| H | -2.312102 | 0.295609  | 1.286622  |
| H | -3.409641 | 0.208266  | -0.085334 |

|    |           |           |           |
|----|-----------|-----------|-----------|
| H  | 1.241366  | 1.104202  | 1.647472  |
| H  | -0.203338 | 2.217540  | 1.549993  |
| H  | 0.507843  | 2.906115  | -0.770939 |
| H  | 1.947586  | 1.788760  | -0.647007 |
| H  | -0.309398 | -1.392228 | 1.406609  |
| H  | -1.750342 | 2.078520  | -0.340072 |
| H  | -1.593064 | 0.882855  | -1.622109 |
| H  | -0.141813 | -2.587112 | 0.118296  |
| Cl | 2.160526  | -0.892937 | -0.041560 |

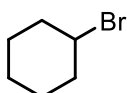

bromocyclohexane

| Conformation | Electronic Energy | Enthalpy     | Gibbs Free Energy |
|--------------|-------------------|--------------|-------------------|
| ax           | -2809.415613      | -2809.246216 | -2809.28596       |
| eq           | -2809.416334      | -2809.246907 | -2809.286926      |

ax

|    |           |           |           |
|----|-----------|-----------|-----------|
| C  | 1.743103  | -1.763947 | 0.000000  |
| C  | 1.074971  | -1.215882 | 1.261018  |
| C  | 1.074971  | 0.311310  | 1.264123  |
| C  | 0.476327  | 0.904107  | 0.000000  |
| C  | 1.074971  | 0.311310  | -1.264123 |
| C  | 1.074971  | -1.215882 | -1.261018 |
| H  | 0.570134  | 0.707115  | 2.144452  |
| H  | 0.045818  | -1.579711 | 1.315161  |
| H  | 1.588653  | -1.578254 | 2.152106  |
| H  | 2.798978  | -1.475731 | 0.000000  |
| H  | 1.709224  | -2.854264 | 0.000000  |
| H  | 0.550889  | 1.986199  | -0.000000 |
| H  | 0.570134  | 0.707115  | -2.144452 |
| H  | 2.110236  | 0.668487  | -1.298413 |
| H  | 0.045818  | -1.579711 | -1.315161 |
| H  | 1.588653  | -1.578254 | -2.152106 |
| H  | 2.110236  | 0.668487  | 1.298413  |
| Br | -1.508704 | 0.626355  | -0.000000 |

eq

|   |           |          |           |
|---|-----------|----------|-----------|
| C | -0.954470 | 2.677305 | 0.000000  |
| C | -0.283620 | 2.128010 | 1.257530  |
| C | -0.283620 | 0.594871 | 1.261298  |
| C | 0.388638  | 0.087511 | -0.000000 |
| C | -0.283620 | 0.594871 | -1.261298 |
| C | -0.283620 | 2.128010 | -1.257530 |

|    |           |           |           |
|----|-----------|-----------|-----------|
| H  | 0.228897  | 0.213151  | 2.143665  |
| H  | 0.748428  | 2.487429  | 1.303864  |
| H  | -0.789221 | 2.489193  | 2.153780  |
| H  | -2.009704 | 2.388226  | 0.000000  |
| H  | -0.919951 | 3.767604  | 0.000000  |
| H  | 1.446900  | 0.339208  | -0.000000 |
| H  | 0.228897  | 0.213151  | -2.143665 |
| H  | -1.313061 | 0.228822  | -1.288333 |
| H  | 0.748428  | 2.487429  | -1.303864 |
| H  | -0.789221 | 2.489193  | -2.153780 |
| H  | -1.313061 | 0.228822  | 1.288333  |
| Br | 0.398130  | -1.902734 | -0.000000 |

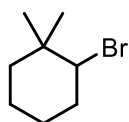

2-bromo-1,1-dimethylcyclohexane

| Conformation | Electronic Energy | Enthalpy     | Gibbs Free Energy |
|--------------|-------------------|--------------|-------------------|
| ax           | -2888.029178      | -2887.801028 | -2887.846182      |
| eq           | -2888.030753      | -2887.802674 | -2887.84812       |

ax

|    |           |           |           |
|----|-----------|-----------|-----------|
| C  | 1.895148  | -1.310237 | -0.852878 |
| C  | 0.819608  | -2.088275 | -0.095207 |
| C  | 0.358158  | -1.330166 | 1.148008  |
| C  | -0.080635 | 0.094373  | 0.837784  |
| C  | 0.950477  | 0.902492  | 0.033818  |
| C  | 1.417067  | 0.102166  | -1.192880 |
| H  | -0.447596 | -1.860298 | 1.653976  |
| H  | -0.036259 | -2.256683 | -0.753368 |
| H  | 1.194460  | -3.069365 | 0.198485  |
| H  | 2.804397  | -1.262202 | -0.248901 |
| H  | 2.157565  | -1.836727 | -1.771715 |
| H  | -0.349725 | 0.630271  | 1.744229  |
| H  | 0.584651  | 0.034659  | -1.899214 |
| H  | 2.210697  | 0.664469  | -1.690388 |
| H  | 1.184668  | -1.263331 | 1.860529  |
| Br | -1.850224 | -0.007107 | -0.110746 |
| C  | 0.398857  | 2.257421  | -0.408889 |
| H  | -0.030982 | 2.799109  | 0.436703  |
| H  | 1.206701  | 2.862647  | -0.823532 |
| H  | -0.370558 | 2.149819  | -1.171420 |

|   |          |          |          |
|---|----------|----------|----------|
| C | 2.133113 | 1.180998 | 0.980522 |
| H | 2.890221 | 1.756617 | 0.445944 |
| H | 1.803264 | 1.771045 | 1.837687 |
| H | 2.605573 | 0.276084 | 1.355430 |

eq

|    |           |           |           |
|----|-----------|-----------|-----------|
| C  | 2.790668  | -0.470768 | 0.162220  |
| C  | 2.011055  | -1.718847 | -0.240922 |
| C  | 0.537837  | -1.600026 | 0.160639  |
| C  | -0.054441 | -0.331675 | -0.429894 |
| C  | 0.655623  | 0.963707  | -0.013602 |
| C  | 2.136926  | 0.777977  | -0.423465 |
| H  | -0.021983 | -2.462959 | -0.197865 |
| H  | 2.075553  | -1.849095 | -1.325145 |
| H  | 2.439885  | -2.611401 | 0.216121  |
| H  | 2.830310  | -0.398731 | 1.251694  |
| H  | 3.821787  | -0.541465 | -0.187243 |
| H  | -0.059859 | -0.396439 | -1.516677 |
| H  | 2.186496  | 0.723256  | -1.515713 |
| H  | 2.681703  | 1.676047  | -0.124452 |
| H  | 0.447080  | -1.581613 | 1.248080  |
| Br | -2.006967 | -0.287585 | -0.000610 |
| C  | 0.097645  | 2.159289  | -0.784672 |
| H  | -0.930123 | 2.375950  | -0.494116 |
| H  | 0.701413  | 3.045406  | -0.580866 |
| H  | 0.118399  | 1.974198  | -1.860679 |
| C  | 0.552750  | 1.242175  | 1.487441  |
| H  | 1.155097  | 2.118369  | 1.733765  |
| H  | -0.478129 | 1.451402  | 1.772418  |
| H  | 0.907850  | 0.411576  | 2.095546  |

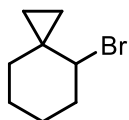

4-bromospiro[2.5]octane

| Conformation | Electronic Energy | Enthalpy     | Gibbs Free Energy |
|--------------|-------------------|--------------|-------------------|
| ax           | -2886.800366      | -2886.59545  | -2886.639124      |
| eq           | -2886.796914      | -2886.591992 | -2886.63557       |

ax

|   |           |           |           |
|---|-----------|-----------|-----------|
| C | 0.982268  | -0.747805 | -0.036073 |
| C | -0.095320 | -0.148847 | 0.817595  |
| H | -0.330493 | -0.790656 | 1.660963  |
| C | 2.015681  | -1.544315 | 0.723146  |
| C | 1.027746  | -2.234242 | -0.180100 |

|    |           |           |           |
|----|-----------|-----------|-----------|
| C  | 0.235736  | 1.265832  | 1.263975  |
| C  | 0.688596  | 2.159060  | 0.110672  |
| H  | -0.150706 | 2.331275  | -0.567895 |
| H  | 0.986127  | 3.131416  | 0.504408  |
| C  | 1.458224  | 0.131835  | -1.171988 |
| C  | 1.844154  | 1.520751  | -0.661061 |
| H  | 2.712282  | 1.431625  | -0.000968 |
| H  | 2.137756  | 2.158655  | -1.495659 |
| H  | 1.885757  | -1.660204 | 1.789936  |
| H  | 3.040042  | -1.459170 | 0.388444  |
| H  | 1.390908  | -2.627501 | -1.119081 |
| H  | 0.237619  | -2.806177 | 0.286632  |
| H  | 1.056833  | 1.165531  | 1.982283  |
| H  | 2.303971  | -0.348695 | -1.666011 |
| H  | 0.659684  | 0.225244  | -1.913887 |
| H  | -0.607975 | 1.701500  | 1.797378  |
| Br | -1.836123 | -0.139041 | -0.195530 |

eq

```
=====
```

|    |           |           |           |
|----|-----------|-----------|-----------|
| C  | -0.696231 | 0.893465  | -0.174117 |
| C  | 0.041339  | -0.403277 | -0.434456 |
| H  | 0.036819  | -0.617339 | -1.501799 |
| C  | -0.388743 | 1.734644  | 1.027060  |
| C  | -0.066401 | 2.235585  | -0.362272 |
| C  | -0.568377 | -1.559906 | 0.341531  |
| C  | -2.048241 | -1.710639 | -0.025726 |
| H  | -2.128437 | -1.988930 | -1.080579 |
| H  | -2.480633 | -2.526150 | 0.555060  |
| C  | -2.162558 | 0.739628  | -0.552292 |
| C  | -2.812928 | -0.411062 | 0.212815  |
| H  | -2.809954 | -0.179047 | 1.281759  |
| H  | -3.854440 | -0.523049 | -0.091399 |
| H  | 0.444105  | 1.450916  | 1.653787  |
| H  | -1.227013 | 2.180074  | 1.544121  |
| H  | -0.691304 | 3.015347  | -0.774443 |
| H  | 0.975747  | 2.281553  | -0.640618 |
| H  | -0.471074 | -1.357781 | 1.411042  |
| H  | -2.676984 | 1.680717  | -0.352287 |
| H  | -2.238063 | 0.549827  | -1.627810 |
| H  | -0.027562 | -2.480270 | 0.124608  |
| Br | 1.981761  | -0.302757 | -0.019906 |

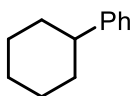

cyclohexylbenzene

| Conformation | Electronic Energy | Enthalpy    | Gibbs Free Energy |
|--------------|-------------------|-------------|-------------------|
| ax           | -466.861333       | -466.597314 | -466.643741       |
| eq           | -466.865604       | -466.601955 | -466.649452       |

ax

| C | 1.424780  | 1.485266  | 0.262044  |
|---|-----------|-----------|-----------|
| C | 0.676241  | 0.385412  | 1.041260  |
| H | 0.507991  | 0.767612  | 2.052246  |
| C | 1.579786  | -0.850712 | 1.162549  |
| C | 2.144821  | -1.333715 | -0.177297 |
| H | 2.830017  | -2.165045 | -0.001643 |
| H | 1.343255  | -1.714892 | -0.813448 |
| C | 1.928198  | 0.994068  | -1.093709 |
| C | 2.858075  | -0.205280 | -0.920363 |
| H | 3.213086  | -0.558418 | -1.890011 |
| H | 3.738721  | 0.106478  | -0.349598 |
| H | 2.420247  | -0.574630 | 1.805414  |
| H | 1.077077  | 0.705362  | -1.719069 |
| H | 2.443351  | 1.804422  | -1.612129 |
| H | 1.055358  | -1.660009 | 1.673304  |
| H | 0.791724  | 2.363646  | 0.138967  |
| H | 2.283804  | 1.797486  | 0.863050  |
| C | -0.710383 | 0.115941  | 0.466130  |
| C | -1.605887 | 1.183003  | 0.329192  |
| C | -1.164566 | -1.154670 | 0.113039  |
| C | -2.892262 | 0.993695  | -0.155130 |
| H | -1.296662 | 2.178921  | 0.620519  |
| C | -2.454000 | -1.350550 | -0.376460 |
| H | -0.519452 | -2.014436 | 0.221416  |
| C | -3.322780 | -0.278640 | -0.518022 |
| H | -3.561521 | 1.839285  | -0.244786 |
| H | -2.775342 | -2.348371 | -0.644999 |
| H | -4.323795 | -0.430321 | -0.898622 |

eq

|   |           |           |           |
|---|-----------|-----------|-----------|
| C | -1.257099 | 0.110323  | -1.258725 |
| C | -0.579854 | -0.452046 | 0.000110  |
| H | -0.731044 | -1.536238 | 0.000377  |
| C | -1.257095 | 0.110941  | 1.258670  |
| C | -2.757957 | -0.177323 | 1.259210  |
| H | -2.914310 | -1.259676 | 1.305318  |
| H | -3.219158 | 0.249392  | 2.151518  |
| C | -2.757960 | -0.177945 | -1.259118 |



|   |           |           |           |
|---|-----------|-----------|-----------|
| C | -3.426827 | 0.372067  | -0.000089 |
| H | -4.490880 | 0.129704  | -0.000028 |
| H | -3.347004 | 1.463853  | -0.000359 |
| H | -1.097404 | 1.193209  | 1.293377  |
| H | -3.219165 | 0.248330  | -2.151636 |
| H | -2.914312 | -1.260321 | -1.304692 |
| H | -0.786381 | -0.311760 | 2.148706  |
| H | -1.097412 | 1.192574  | -1.293964 |
| H | -0.786388 | -0.312815 | -2.148554 |
| C | 0.910899  | -0.202454 | 0.000047  |
| C | 1.811820  | -1.266475 | 0.000303  |
| C | 1.424529  | 1.097284  | -0.000265 |
| C | 3.185510  | -1.045317 | 0.000250  |
| H | 1.432063  | -2.281058 | 0.000548  |
| C | 2.794871  | 1.323446  | -0.000319 |
| H | 0.746266  | 1.941811  | -0.000468 |
| C | 3.682195  | 0.251593  | -0.000062 |
| H | 3.865571  | -1.887023 | 0.000454  |
| H | 3.171945  | 2.337746  | -0.000563 |
| H | 4.749430  | 0.427704  | -0.000104 |

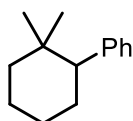

(2,2-dimethylcyclohexyl)benzene

| Conformation | Electronic Energy | Enthalpy    | Gibbs Free Energy |
|--------------|-------------------|-------------|-------------------|
| ax           | -545.473208       | -545.150506 | -545.202886       |
| eq           | -545.479336       | -545.156937 | -545.208878       |

ax

|   |           |           |           |
|---|-----------|-----------|-----------|
| C | 1.053279  | -0.927914 | -1.492464 |
| C | 0.436408  | 0.311392  | -0.805872 |
| H | 0.356274  | 1.081687  | -1.577105 |
| C | 1.390966  | 0.908371  | 0.274726  |
| C | 1.940527  | -0.182166 | 1.210963  |
| H | 2.671845  | 0.278297  | 1.880918  |
| H | 1.132949  | -0.550416 | 1.847909  |
| C | 1.599156  | -1.980058 | -0.527069 |
| C | 2.575725  | -1.359856 | 0.471187  |
| H | 2.905680  | -2.110863 | 1.191061  |
| H | 3.469301  | -1.023355 | -0.061011 |
| H | 0.781865  | -2.463303 | 0.011147  |
| H | 2.096798  | -2.765577 | -1.098827 |
| H | 0.309920  | -1.371926 | -2.157252 |
| H | 1.874471  | -0.590014 | -2.128749 |
| C | -0.994239 | 0.071831  | -0.350147 |
| C | -2.015428 | 0.804954  | -0.961209 |
| C | -1.366886 | -0.845803 | 0.638646  |

|   |           |           |           |
|---|-----------|-----------|-----------|
| C | -3.349977 | 0.635825  | -0.610403 |
| H | -1.757814 | 1.524724  | -1.728591 |
| C | -2.700075 | -1.018391 | 0.994543  |
| H | -0.622139 | -1.433762 | 1.152058  |
| C | -3.699762 | -0.280304 | 0.372661  |
| H | -4.113478 | 1.221005  | -1.105964 |
| H | -2.956115 | -1.734319 | 1.764564  |
| H | -4.735790 | -0.417305 | 0.651570  |
| C | 2.556248  | 1.603153  | -0.445327 |
| H | 2.188017  | 2.444980  | -1.035148 |
| H | 3.270930  | 1.990361  | 0.283919  |
| H | 3.094838  | 0.936493  | -1.117249 |
| C | 0.667868  | 1.968263  | 1.107618  |
| H | 0.219638  | 2.730500  | 0.465389  |
| H | -0.124295 | 1.532472  | 1.717559  |
| H | 1.374250  | 2.464537  | 1.776684  |

eq

```
=====
```

|   |           |           |           |
|---|-----------|-----------|-----------|
| C | -1.193479 | 0.906229  | 0.232495  |
| C | -0.428128 | -0.217132 | -0.533115 |
| H | -0.563111 | 0.016857  | -1.594926 |
| C | -1.055238 | -1.600398 | -0.301773 |
| C | -2.528459 | -1.620584 | -0.702605 |
| H | -2.608783 | -1.440921 | -1.779388 |
| H | -2.955585 | -2.606288 | -0.510399 |
| C | -2.676576 | 0.829297  | -0.178283 |
| C | -3.310545 | -0.542079 | 0.042684  |
| H | -4.348566 | -0.525833 | -0.294277 |
| H | -3.329998 | -0.778106 | 1.109986  |
| H | -0.966133 | -1.886250 | 0.748616  |
| H | -3.230138 | 1.597758  | 0.367582  |
| H | -2.749886 | 1.080691  | -1.241911 |
| H | -0.496876 | -2.342144 | -0.876692 |
| C | 1.065271  | -0.216501 | -0.280115 |
| C | 1.926851  | 0.407568  | -1.184445 |
| C | 1.628459  | -0.828733 | 0.842233  |
| C | 3.300969  | 0.430203  | -0.976444 |
| H | 1.511417  | 0.881232  | -2.065855 |
| C | 3.002110  | -0.808936 | 1.056267  |
| H | 0.991228  | -1.327051 | 1.560840  |
| C | 3.844878  | -0.178071 | 0.148517  |
| H | 3.945979  | 0.919337  | -1.694519 |
| H | 3.414623  | -1.289931 | 1.933459  |
| H | 4.913784  | -0.165325 | 0.313805  |
| C | -1.060104 | 0.776312  | 1.753412  |
| H | -0.033082 | 0.954764  | 2.073613  |
| H | -1.692109 | 1.523038  | 2.239344  |
| H | -1.361731 | -0.203599 | 2.122532  |
| C | -0.658514 | 2.278903  | -0.179702 |
| H | -0.702970 | 2.408616  | -1.263472 |
| H | -1.258815 | 3.067664  | 0.279241  |
| H | 0.375783  | 2.419022  | 0.137675  |

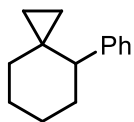

4-phenylspiro[2.5]octane

| Conformation | Electronic Energy | Enthalpy    | Gibbs Free Energy |
|--------------|-------------------|-------------|-------------------|
| ax1          | -544.243268       | -543.943695 | -543.994695       |
| ax2          | -544.243269       | -543.943696 | -543.994702       |
| ax3          | -544.246064       | -543.946765 | -543.997341       |
| eq1          | -544.247500       | -543.948328 | -543.998962       |

ax1

```

=====
C  -1.366714    0.808823   -0.277866
C  -0.436642    0.291772    0.819574
H  -0.361528    1.090271    1.560321
C  -2.308055    1.914409    0.114716
C  -1.133389    2.194495   -0.792428
C  -1.088511   -0.911423    1.532793
C  -1.668208   -1.974104    0.596076
H  -0.868671   -2.513564    0.085883
H  -2.204615   -2.714885    1.191833
C  -1.918494   -0.240286   -1.221296
C  -2.610945   -1.355639   -0.436715
H  -3.480215   -0.935844    0.079233
H  -2.981907   -2.123240   -1.117660
H  -2.258846    2.289492    1.127608
H  -3.294805    1.913458   -0.327759
H  -1.338732    2.387591   -1.836345
H  -0.303597    2.751103   -0.377521
H  -1.909010   -0.515358    2.138602
H  -2.620707    0.234188   -1.909728
H  -1.115612   -0.660030   -1.832784
H  -0.372297   -1.360304    2.223281
C   0.988408    0.057336    0.346714
C   1.363771   -0.937023   -0.562971
C   1.995494    0.891785    0.840539
C   2.689348   -1.086801   -0.956359
H   0.628445   -1.608180   -0.978804
C   3.321545    0.746647    0.449948
H   1.733351    1.669345    1.547610
C   3.675379   -0.246972   -0.453428
H   2.949934   -1.865739   -1.660842
H   4.075604    1.409915    0.852858
H   4.705285   -0.366326   -0.761570

```

ax2

```
=====
C -1.366877    0.808764   -0.277956
C -0.436644    0.291864    0.819455
H -0.361569    1.090415    1.560143
C -2.308352    1.914188    0.114744
C -1.133769    2.194498   -0.792466
C -1.088353   -0.911311    1.532850
C -1.667967   -1.974110    0.596232
H -0.868375   -2.513474    0.086036
H -2.204198   -2.714948    1.192064
C -1.918587   -0.240479   -1.221250
C -2.610889   -1.355852   -0.436551
H -3.480154   -0.936144    0.079466
H -2.981825   -2.123551   -1.117411
H -2.259151    2.289175    1.127667
H -3.295092    1.913143   -0.327747
H -1.339329    2.387656   -1.836332
H -0.304045    2.751231   -0.377601
H -1.908859   -0.515318    2.138686
H -2.620803    0.233859   -1.909767
H -1.115687   -0.660292   -1.832682
H -0.372067   -1.360065    2.223370
C  0.988441    0.057481    0.346578
C  1.363832   -0.936783   -0.563200
C  1.995580    0.891789    0.840561
C  2.689432   -1.086604   -0.956501
H  0.628509   -1.607796   -0.979247
C  3.321660    0.746611    0.450060
H  1.733494    1.669304    1.547691
C  3.675497   -0.246922   -0.453379
H  2.950005   -1.865463   -1.661070
H  4.075714    1.409792    0.853129
H  4.705420   -0.366333   -0.761445
```

ax3

```
=====
C  1.487228    0.725733   -0.165220
C  0.463162   -0.140180   -0.885609
H  0.445642    0.177856   -1.932722
C  2.606746    1.272551   -1.007859
C  1.531618    2.189503   -0.480116
C  0.947327   -1.603562   -0.853545
C  1.245548   -2.079061    0.567815
H  0.328625   -2.047487    1.165316
H  1.575667   -3.118776    0.546570
C  1.856966    0.263807    1.232866
C  2.307047   -1.197158    1.223971
H  3.242459   -1.285073    0.662689
H  2.508683   -1.533666    2.242137
H  2.601279    1.049192   -2.065846
H  3.587187    1.336666   -0.556537
H  1.795343    2.869281    0.318721
H  0.808198    2.571859   -1.187622
```

|   |           |           |           |
|---|-----------|-----------|-----------|
| H | 1.864590  | -1.665230 | -1.445969 |
| H | 2.645023  | 0.908975  | 1.626411  |
| H | 0.999013  | 0.361157  | 1.903227  |
| H | 0.218644  | -2.258352 | -1.330103 |
| C | -0.967145 | 0.010046  | -0.374783 |
| C | -1.979460 | -0.774434 | -0.938034 |
| C | -1.334316 | 0.936762  | 0.601113  |
| C | -3.300847 | -0.652644 | -0.530935 |
| H | -1.734667 | -1.484744 | -1.717506 |
| C | -2.658211 | 1.061229  | 1.014843  |
| H | -0.586970 | 1.580040  | 1.042450  |
| C | -3.647198 | 0.264704  | 0.455761  |
| H | -4.061666 | -1.272168 | -0.987309 |
| H | -2.912489 | 1.786504  | 1.776623  |
| H | -4.675342 | 0.360183  | 0.777861  |

eq1

```
=====
```

|   |           |           |           |
|---|-----------|-----------|-----------|
| C | 1.226057  | 0.879446  | -0.017721 |
| C | 0.460099  | -0.353163 | -0.514540 |
| H | 0.595581  | -0.374535 | -1.601614 |
| C | 0.578589  | 2.228193  | 0.049421  |
| C | 0.902613  | 1.477823  | 1.320360  |
| C | 1.128270  | -1.615519 | 0.050552  |
| C | 2.602936  | -1.685318 | -0.344665 |
| H | 2.679218  | -1.762353 | -1.433771 |
| H | 3.057314  | -2.585902 | 0.071488  |
| C | 2.692953  | 0.827237  | -0.401408 |
| C | 3.358315  | -0.443410 | 0.125704  |
| H | 4.399575  | -0.485697 | -0.197936 |
| H | 3.361599  | -0.417824 | 1.219735  |
| H | -0.464695 | 2.316092  | -0.218302 |
| H | 1.190238  | 3.084587  | -0.199293 |
| H | 1.730166  | 1.832503  | 1.919426  |
| H | 0.070615  | 1.076249  | 1.881260  |
| H | 1.055018  | -1.607985 | 1.141406  |
| H | 2.776941  | 0.851955  | -1.493194 |
| H | 3.200882  | 1.714443  | -0.018393 |
| H | 0.596178  | -2.500834 | -0.303209 |
| C | -1.031791 | -0.301026 | -0.267562 |
| C | -1.611003 | -0.751757 | 0.919536  |
| C | -1.873867 | 0.224340  | -1.249931 |
| C | -2.985428 | -0.672901 | 1.119860  |
| H | -0.989900 | -1.170446 | 1.700092  |
| C | -3.246971 | 0.305237  | -1.055713 |
| H | -1.442336 | 0.574462  | -2.180177 |
| C | -3.808939 | -0.143487 | 0.134168  |
| H | -3.412100 | -1.028987 | 2.048270  |
| H | -3.877496 | 0.715021  | -1.833693 |
| H | -4.877789 | -0.084925 | 0.289535  |

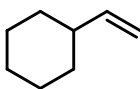

vinylcyclohexane

| Conformation | Electronic Energy | Enthalpy    | Gibbs Free Energy |
|--------------|-------------------|-------------|-------------------|
| ax           | -313.217508       | -313.004442 | -313.045632       |
| ax2          | -313.217766       | -313.004702 | -313.044951       |
| eq           | -313.220192       | -313.007328 | -313.048322       |
| eq2          | -313.220027       | -313.007132 | -313.047834       |

ax

|   |           |           |           |
|---|-----------|-----------|-----------|
| C | 0.189626  | -1.259307 | 0.701170  |
| C | -0.697749 | -0.000405 | 0.675791  |
| H | -1.319198 | -0.000549 | 1.574308  |
| C | 0.189146  | 1.258967  | 0.701484  |
| C | 1.245172  | 1.259927  | -0.405233 |
| H | 0.759442  | 1.314004  | -1.383520 |
| H | 1.868434  | 2.151226  | -0.315443 |
| C | 1.245764  | -1.259516 | -0.405504 |
| C | 2.108901  | 0.000389  | -0.340641 |
| H | 2.669700  | 0.000464  | 0.599714  |
| H | 2.841288  | 0.000638  | -1.149696 |
| H | 0.697364  | 1.295170  | 1.669828  |
| H | 1.869397  | -2.150562 | -0.315847 |
| H | 0.760110  | -1.313587 | -1.383827 |
| H | -0.436679 | 2.150909  | 0.633973  |
| C | -1.625815 | -0.000287 | -0.507294 |
| C | -2.950610 | 0.000096  | -0.417346 |
| H | -1.170589 | -0.000299 | -1.493509 |
| H | -3.578721 | 0.000444  | -1.299243 |
| H | -3.449309 | 0.000188  | 0.545900  |
| H | -0.435667 | -2.151600 | 0.633286  |
| H | 0.697827  | -1.295627 | 1.669520  |

ax2

|   |           |           |           |
|---|-----------|-----------|-----------|
| C | -0.519452 | 1.433502  | 0.459198  |
| C | 0.621464  | 0.467409  | 0.826556  |
| H | 1.044842  | 0.818560  | 1.773813  |
| C | 0.068277  | -0.945806 | 1.046055  |
| C | -0.777982 | -1.444337 | -0.129092 |
| H | -0.149260 | -1.578124 | -1.012144 |
| H | -1.197309 | -2.422676 | 0.112677  |
| C | -1.328594 | 0.935191  | -0.737328 |
| C | -1.896231 | -0.457421 | -0.464766 |
| H | -2.592475 | -0.399787 | 0.378311  |
| H | -2.465614 | -0.811842 | -1.325779 |
| H | -0.561536 | -0.922004 | 1.939876  |

|   |           |           |           |
|---|-----------|-----------|-----------|
| H | -2.133660 | 1.637586  | -0.959762 |
| H | -0.686408 | 0.895331  | -1.622882 |
| H | 0.881324  | -1.643127 | 1.256222  |
| C | 1.738299  | 0.558654  | -0.182960 |
| C | 2.389523  | -0.442618 | -0.762206 |
| H | 2.035751  | 1.575471  | -0.430771 |
| H | 3.198696  | -0.250030 | -1.455279 |
| H | 2.148592  | -1.480558 | -0.568630 |
| H | -0.109800 | 2.425995  | 0.259733  |
| H | -1.184969 | 1.527759  | 1.321867  |

eq

```
=====
```

|   |           |           |           |
|---|-----------|-----------|-----------|
| C | 0.100120  | -1.257880 | 0.257718  |
| C | -0.665910 | 0.000538  | -0.177743 |
| H | -0.736211 | 0.000421  | -1.270766 |
| C | 0.100712  | 1.258332  | 0.257632  |
| C | 1.533970  | 1.258112  | -0.272322 |
| H | 1.511204  | 1.302477  | -1.365696 |
| H | 2.058563  | 2.151181  | 0.071539  |
| C | 1.533385  | -1.258676 | -0.271931 |
| C | 2.283857  | -0.000382 | 0.161597  |
| H | 2.383172  | -0.000222 | 1.251762  |
| H | 3.294103  | -0.000657 | -0.251145 |
| H | 0.118571  | 1.294382  | 1.352419  |
| H | 2.057386  | -2.151876 | 0.072501  |
| H | 1.510877  | -1.303560 | -1.365293 |
| H | -0.432202 | 2.148256  | -0.083013 |
| C | -2.053714 | 0.000430  | 0.388675  |
| C | -3.172430 | -0.000324 | -0.325824 |
| H | -2.116409 | 0.000986  | 1.475340  |
| H | -4.146695 | -0.000490 | 0.146166  |
| H | -3.146498 | -0.000701 | -1.410017 |
| H | -0.433432 | -2.147279 | -0.083061 |
| H | 0.117628  | -1.293827 | 1.352450  |

eq2

```
=====
```

|   |           |           |           |
|---|-----------|-----------|-----------|
| C | -0.218830 | -1.325593 | -0.205278 |
| C | 0.618668  | -0.221051 | 0.460649  |
| H | 0.440357  | -0.296533 | 1.541406  |
| C | 0.144026  | 1.155869  | -0.000375 |
| C | -1.348620 | 1.348113  | 0.269263  |
| H | -1.523316 | 1.328368  | 1.349600  |
| H | -1.668083 | 2.329147  | -0.086280 |
| C | -1.711347 | -1.134753 | 0.059596  |
| C | -2.178266 | 0.248300  | -0.391916 |
| H | -2.071701 | 0.324492  | -1.478730 |
| H | -3.237004 | 0.383928  | -0.164528 |
| H | 0.331218  | 1.254792  | -1.074899 |
| H | -2.283228 | -1.913552 | -0.447822 |
| H | -1.900895 | -1.245458 | 1.131889  |
| H | 0.721529  | 1.938019  | 0.496840  |
| C | 2.081406  | -0.479538 | 0.234053  |

|   |           |           |           |
|---|-----------|-----------|-----------|
| C | 2.951017  | 0.338821  | -0.346993 |
| H | 2.431349  | -1.450396 | 0.577142  |
| H | 3.986575  | 0.049942  | -0.473779 |
| H | 2.667415  | 1.318005  | -0.712207 |
| H | 0.110647  | -2.303652 | 0.151683  |
| H | -0.033190 | -1.298114 | -1.284310 |

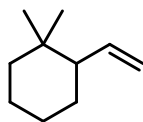

1,1-dimethyl-2-vinylcyclohexane

| Conformation | Electronic Energy | Enthalpy    | Gibbs Free Energy |
|--------------|-------------------|-------------|-------------------|
| ax           | -391.832190       | -391.560485 | -391.606669       |
| ax2          | -391.830248       | -391.558314 | -391.603891       |
| ax3          | -391.826775       | -391.554838 | -391.600655       |
| eq           | -391.834282       | -391.562742 | -391.609318       |
| eq2          | -391.833558       | -391.561943 | -391.60823        |
| eq3          | -391.828133       | -391.556322 | -391.602741       |

ax

|   |           |           |           |
|---|-----------|-----------|-----------|
| C | -0.219936 | 0.977420  | 0.040667  |
| C | 0.656849  | -0.188629 | 0.583929  |
| H | 1.175998  | 0.182619  | 1.473019  |
| C | -0.209222 | -1.396685 | 0.999205  |
| C | -1.132762 | -1.871246 | -0.123339 |
| H | -0.537372 | -2.255904 | -0.956080 |
| H | -1.747052 | -2.700088 | 0.232442  |
| C | -1.168064 | 0.464373  | -1.058234 |
| C | -2.017212 | -0.730246 | -0.623769 |
| H | -2.706114 | -0.430502 | 0.170201  |
| H | -2.631225 | -1.068048 | -1.460462 |
| H | -0.815319 | -1.121842 | 1.865107  |
| H | -1.808738 | 1.290128  | -1.379472 |
| H | -0.574008 | 0.173742  | -1.930267 |
| H | 0.446121  | -2.208432 | 1.320433  |
| C | 1.713904  | -0.625332 | -0.394111 |
| C | 3.015899  | -0.628748 | -0.134991 |
| H | 1.375214  | -0.974043 | -1.365813 |
| H | 3.738510  | -0.972319 | -0.864511 |
| H | 3.400232  | -0.286331 | 0.819857  |
| C | -1.024295 | 1.586841  | 1.195406  |
| H | -0.350328 | 2.001143  | 1.948402  |
| H | -1.653841 | 2.399001  | 0.825477  |
| H | -1.671933 | 0.864510  | 1.689468  |
| C | 0.666764  | 2.080459  | -0.539983 |
| H | 1.201972  | 1.741942  | -1.427924 |
| H | 0.059298  | 2.943379  | -0.821220 |
| H | 1.407034  | 2.411803  | 0.192664  |



ax2

```
=====
C  0.993053    -0.462690    0.014826
C -0.391949    -0.536308    0.731969
H -0.211811    -1.090257    1.662037
C -0.903891     0.862908    1.107295
C -0.923983     1.837950   -0.073546
H -1.659046     1.515163   -0.813795
H -1.236126     2.824426    0.274188
C  0.918326     0.526630   -1.160246
C  0.443565     1.919282   -0.749710
H  1.166051     2.376007   -0.068458
H  0.389508     2.564643   -1.628257
H -0.262204     1.275109    1.887766
H  1.900943     0.581011   -1.636695
H  0.224962     0.125931   -1.907539
H -1.899442     0.780356    1.546770
C -1.404565    -1.361310   -0.026068
C -2.651672    -1.027695   -0.339586
H -1.075613    -2.359357   -0.296019
H -3.296469    -1.732222   -0.849877
H -3.079648    -0.062485   -0.101679
C  2.058673    -0.015797    1.024684
H  2.174825    -0.769288    1.806848
H  3.022626     0.099904    0.524695
H  1.820276     0.930095    1.507014
C  1.425422    -1.831003   -0.519688
H  0.820881    -2.150459   -1.368676
H  2.463652    -1.782679   -0.854150
H  1.358751    -2.597702    0.256247
```

ax3

```
=====
C  0.256902     0.969210   -0.044892
C -0.534995    -0.052728   -0.906048
H -0.684422     0.423713   -1.880821
C  0.288332    -1.339804   -1.155778
C  0.784643    -1.960955    0.148079
H -0.071445    -2.270330    0.755098
H  1.362565    -2.860955   -0.068564
C  0.836085     0.313898    1.223336
C  1.627739    -0.963848    0.941105
H  2.533949    -0.727356    0.377300
H  1.952149    -1.408380    1.883619
H  1.144541    -1.106147   -1.791122
H  1.469708     1.046430    1.731138
H  0.025242     0.073585    1.913763
H -0.324571    -2.054791   -1.708498
C -1.914748    -0.476809   -0.457215
C -2.481969    -0.469678    0.743726
H -2.498702    -0.902634   -1.270500
H -3.483137    -0.862896    0.871617
```

|   |           |           |           |
|---|-----------|-----------|-----------|
| H | -1.999384 | -0.084463 | 1.630315  |
| C | 1.409509  | 1.520800  | -0.900463 |
| H | 1.015343  | 2.052464  | -1.769213 |
| H | 2.002046  | 2.226789  | -0.315226 |
| H | 2.081273  | 0.744144  | -1.261440 |
| C | -0.612908 | 2.169359  | 0.341260  |
| H | -1.387378 | 1.912539  | 1.060348  |
| H | 0.009720  | 2.949406  | 0.785052  |
| H | -1.099038 | 2.592218  | -0.541528 |

eq

```
=====
```

|   |           |           |           |
|---|-----------|-----------|-----------|
| C | -0.045162 | 0.899671  | -0.001415 |
| C | 0.554008  | -0.519899 | -0.222768 |
| H | 0.635250  | -0.653328 | -1.307629 |
| C | -0.366151 | -1.628245 | 0.316263  |
| C | -1.771401 | -1.546082 | -0.274551 |
| H | -1.717558 | -1.734102 | -1.351543 |
| H | -2.403880 | -2.325303 | 0.154238  |
| C | -1.466601 | 0.922888  | -0.591855 |
| C | -2.382750 | -0.167203 | -0.040595 |
| H | -2.543572 | -0.015720 | 1.030135  |
| H | -3.362033 | -0.101313 | -0.517984 |
| H | -0.421299 | -1.557197 | 1.406324  |
| H | -1.901357 | 1.910891  | -0.418702 |
| H | -1.388614 | 0.796420  | -1.677224 |
| H | 0.082362  | -2.597639 | 0.089448  |
| C | 1.927640  | -0.674672 | 0.363417  |
| C | 3.040846  | -0.840185 | -0.340511 |
| H | 1.988018  | -0.670784 | 1.449173  |
| H | 4.002725  | -0.964827 | 0.140784  |
| H | 3.023378  | -0.855119 | -1.424982 |
| C | -0.080247 | 1.281965  | 1.482985  |
| H | 0.928617  | 1.396436  | 1.881944  |
| H | -0.592939 | 2.238674  | 1.604588  |
| H | -0.600903 | 0.546360  | 2.095426  |
| C | 0.797902  | 1.935131  | -0.747530 |
| H | 0.871091  | 1.686973  | -1.808938 |
| H | 0.342992  | 2.924593  | -0.662535 |
| H | 1.809217  | 1.994770  | -0.343169 |

eq2

```
=====
```

|   |           |           |           |
|---|-----------|-----------|-----------|
| C | -0.195594 | 0.949778  | 0.007932  |
| C | 0.578315  | -0.279350 | -0.562134 |
| H | 0.381400  | -0.264762 | -1.642646 |
| C | 0.036143  | -1.605167 | -0.022342 |
| C | -1.457790 | -1.757322 | -0.298808 |
| H | -1.618907 | -1.797650 | -1.380821 |
| H | -1.821065 | -2.700438 | 0.112957  |
| C | -1.698325 | 0.739764  | -0.255569 |
| C | -2.243219 | -0.582718 | 0.278075  |
| H | -2.177673 | -0.601590 | 1.369170  |
| H | -3.301238 | -0.673114 | 0.025560  |

|   |           |           |           |
|---|-----------|-----------|-----------|
| H | 0.214403  | -1.672120 | 1.054216  |
| H | -2.248458 | 1.580246  | 0.175699  |
| H | -1.863019 | 0.774627  | -1.338094 |
| H | 0.586590  | -2.429361 | -0.480523 |
| C | 2.067979  | -0.136363 | -0.399350 |
| C | 2.870804  | -0.953296 | 0.273457  |
| H | 2.513080  | 0.723141  | -0.891372 |
| H | 3.935184  | -0.762699 | 0.328503  |
| H | 2.504948  | -1.832933 | 0.788088  |
| C | 0.061646  | 1.128813  | 1.507419  |
| H | 1.115082  | 1.338046  | 1.699297  |
| H | -0.520827 | 1.972510  | 1.884131  |
| H | -0.214017 | 0.249360  | 2.088500  |
| C | 0.232742  | 2.230804  | -0.713311 |
| H | 0.155732  | 2.114970  | -1.796841 |
| H | -0.415008 | 3.058693  | -0.416730 |
| H | 1.257582  | 2.513414  | -0.471309 |

eq3

```
=====
```

|   |           |           |           |
|---|-----------|-----------|-----------|
| C | 0.115043  | 0.832451  | -0.051282 |
| C | 0.404185  | -0.633855 | -0.463293 |
| H | 0.211329  | -0.677470 | -1.544673 |
| C | -0.591363 | -1.623144 | 0.175928  |
| C | -2.038994 | -1.273929 | -0.157332 |
| H | -2.192477 | -1.395136 | -1.234346 |
| H | -2.717378 | -1.967596 | 0.342385  |
| C | -1.359067 | 1.127166  | -0.406413 |
| C | -2.359707 | 0.166696  | 0.231016  |
| H | -2.334906 | 0.266944  | 1.319098  |
| H | -3.371628 | 0.427121  | -0.084523 |
| H | -0.449191 | -1.631554 | 1.260053  |
| H | -1.584298 | 2.156971  | -0.117837 |
| H | -1.466203 | 1.072039  | -1.495224 |
| H | -0.361226 | -2.630632 | -0.176345 |
| C | 1.795270  | -1.191082 | -0.288633 |
| C | 2.893606  | -0.672110 | 0.249373  |
| H | 1.876879  | -2.206376 | -0.672167 |
| H | 3.803205  | -1.259145 | 0.283553  |
| H | 2.950078  | 0.323356  | 0.663073  |
| C | 0.328191  | 1.096708  | 1.445575  |
| H | 1.376438  | 1.035855  | 1.729968  |
| H | -0.019615 | 2.103685  | 1.687877  |
| H | -0.224420 | 0.399199  | 2.073667  |
| C | 0.972850  | 1.804716  | -0.867601 |
| H | 0.853796  | 1.616228  | -1.937043 |
| H | 0.657384  | 2.832260  | -0.672339 |
| H | 2.032154  | 1.732548  | -0.629202 |

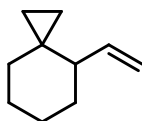

4-vinylspiro[2.5]octane

| Conformation | Electronic Energy | Enthalpy    | Gibbs Free Energy |
|--------------|-------------------|-------------|-------------------|
| ax1          | -390.602152       | -390.353623 | -390.398496       |
| ax2          | -390.602155       | -390.353734 | -390.397852       |
| ax3          | -390.601998       | -390.353429 | -390.397494       |
| eq           | -390.602353       | -390.353998 | -390.398994       |
| eq2          | -390.595500       | -390.346494 | -390.390333       |
| eq3          | -390.601806       | -390.353289 | -390.397875       |

ax1

```

=====
C  -0.174992    0.891436   -0.052093
C   0.687485   -0.219234    0.542810
H   1.270213    0.207907    1.362961
C  -0.577318    2.005547    0.870979
C   0.442655    2.243364   -0.218856
C  -0.224885   -1.324395    1.107346
C  -1.247420   -1.822182    0.083409
H  -0.733818   -2.315370   -0.746513
H  -1.889805   -2.573629    0.545205
C  -1.199820    0.418514   -1.063328
C  -2.090639   -0.668606   -0.460856
H  -2.678049   -0.236973    0.355502
H  -2.797288   -1.034155   -1.207615
H  -0.220917    1.973679    1.891441
H  -1.560556    2.436662    0.740265
H   0.139965    2.838206   -1.069630
H   1.475730    2.360896    0.080650
H  -0.761035   -0.912324    1.967321
H  -1.798416    1.268567   -1.396410
H  -0.690890    0.020372   -1.946769
H   0.384621   -2.152621    1.473410
C   1.660567   -0.755070   -0.471028
C   2.980225   -0.667201   -0.354241
H   1.242568   -1.234462   -1.351533
H   3.644255   -1.063500   -1.112050
H   3.438269   -0.196289    0.508910

```

ax2

```

=====
C  -0.631921   -0.595905    0.023469
C  -0.179250    0.599852    0.844908
H  -0.741354    0.596117    1.785761
C  -1.149299   -1.782773    0.788733
C  -2.092951   -0.922795   -0.015874

```

|   |           |           |           |
|---|-----------|-----------|-----------|
| C | 1.312185  | 0.449027  | 1.198497  |
| C | 2.170368  | 0.209570  | -0.043687 |
| H | 2.112570  | 1.081710  | -0.702536 |
| H | 3.216547  | 0.098260  | 0.245610  |
| C | 0.222223  | -0.889271 | -1.195629 |
| C | 1.694731  | -1.027929 | -0.805163 |
| H | 1.817582  | -1.909540 | -0.168244 |
| H | 2.305755  | -1.186062 | -1.695292 |
| H | -1.198630 | -1.709692 | 1.866520  |
| H | -0.916469 | -2.766472 | 0.404871  |
| H | -2.493462 | -1.335366 | -0.931930 |
| H | -2.766497 | -0.274650 | 0.528314  |
| H | 1.421876  | -0.402369 | 1.875791  |
| H | -0.137040 | -1.801518 | -1.676101 |
| H | 0.123264  | -0.080683 | -1.924662 |
| H | 1.653435  | 1.335786  | 1.736304  |
| C | -0.442555 | 1.940366  | 0.203140  |
| C | -1.151180 | 2.183749  | -0.892419 |
| H | -0.004284 | 2.783569  | 0.732477  |
| H | -1.291569 | 3.196724  | -1.247977 |
| H | -1.615844 | 1.390832  | -1.464751 |

ax3

```
=====
```

|   |           |           |           |
|---|-----------|-----------|-----------|
| C | 0.975055  | -0.296041 | -0.071830 |
| C | -0.323058 | -0.672149 | 0.635694  |
| H | -0.051847 | -1.330685 | 1.468551  |
| C | 2.229208  | -0.266108 | 0.752092  |
| C | 2.009918  | -1.359395 | -0.268003 |
| C | -0.981417 | 0.589615  | 1.207357  |
| C | -1.150364 | 1.694572  | 0.159906  |
| H | -1.864128 | 1.377689  | -0.603881 |
| H | -1.567316 | 2.584630  | 0.634161  |
| C | 0.808969  | 0.777881  | -1.126467 |
| C | 0.180189  | 2.030704  | -0.515145 |
| H | 0.867965  | 2.448342  | 0.226836  |
| H | 0.032530  | 2.792944  | -1.281922 |
| H | 2.156894  | -0.536104 | 1.796798  |
| H | 2.963862  | 0.493603  | 0.522973  |
| H | 2.601828  | -1.328973 | -1.172420 |
| H | 1.791224  | -2.351163 | 0.104491  |
| H | -0.339383 | 0.965077  | 2.008985  |
| H | 1.779336  | 1.007951  | -1.570592 |
| H | 0.165114  | 0.405018  | -1.930314 |
| H | -1.941586 | 0.343470  | 1.663805  |
| C | -1.204258 | -1.489428 | -0.277428 |
| C | -2.507355 | -1.343399 | -0.483008 |
| H | -0.686864 | -2.292661 | -0.796783 |
| H | -3.041556 | -2.011934 | -1.146279 |
| H | -3.087392 | -0.564706 | -0.003415 |

eq

|   |           |           |           |
|---|-----------|-----------|-----------|
| C | -0.082805 | 0.828699  | -0.148092 |
| C | 0.535956  | -0.568322 | -0.236373 |
| H | 0.568648  | -0.837644 | -1.298310 |
| C | 0.216479  | 1.708717  | 1.032216  |
| C | 0.765949  | 2.047956  | -0.334389 |
| C | -0.376385 | -1.575449 | 0.485696  |
| C | -1.805823 | -1.539883 | -0.052124 |
| H | -1.802423 | -1.861825 | -1.098189 |
| H | -2.427293 | -2.248848 | 0.497408  |
| C | -1.499256 | 0.870573  | -0.687104 |
| C | -2.395381 | -0.133474 | 0.036250  |
| H | -2.481848 | 0.156390  | 1.088008  |
| H | -3.401293 | -0.115048 | -0.386281 |
| H | 0.916264  | 1.364135  | 1.779779  |
| H | -0.591777 | 2.317709  | 1.413407  |
| H | 0.326697  | 2.885665  | -0.858378 |
| H | 1.827327  | 1.912856  | -0.488608 |
| H | -0.381656 | -1.334102 | 1.553881  |
| H | -1.895526 | 1.883092  | -0.588187 |
| H | -1.482046 | 0.632649  | -1.756239 |
| H | 0.042037  | -2.578756 | 0.385183  |
| C | 1.932263  | -0.659053 | 0.305428  |
| C | 3.010108  | -0.913101 | -0.425867 |
| H | 2.041966  | -0.532009 | 1.379479  |
| H | 3.992632  | -0.990537 | 0.022188  |
| H | 2.941658  | -1.053701 | -1.498988 |

eq2

|   |           |           |           |
|---|-----------|-----------|-----------|
| C | 0.052209  | 0.774450  | -0.209782 |
| C | 0.367915  | -0.692944 | -0.479626 |
| H | 0.112862  | -0.869005 | -1.533615 |
| C | 0.617752  | 1.504710  | 0.975095  |
| C | 1.042599  | 1.877367  | -0.428991 |
| C | -0.594200 | -1.576367 | 0.344221  |
| C | -2.057587 | -1.255574 | 0.048554  |
| H | -2.273162 | -1.511214 | -0.993576 |
| H | -2.707202 | -1.873978 | 0.670275  |
| C | -1.396811 | 1.095173  | -0.538115 |
| C | -2.355513 | 0.225213  | 0.272519  |
| H | -2.238897 | 0.460554  | 1.334844  |
| H | -3.389180 | 0.450510  | 0.004926  |
| H | 1.330606  | 1.003928  | 1.611777  |
| H | -0.045298 | 2.186083  | 1.490994  |
| H | 0.657995  | 2.803983  | -0.832876 |
| H | 2.044809  | 1.630077  | -0.742227 |
| H | -0.385129 | -1.412951 | 1.406256  |
| H | -1.583849 | 2.153178  | -0.345114 |
| H | -1.568800 | 0.925481  | -1.606545 |
| H | -0.390419 | -2.628108 | 0.134399  |
| C | 1.763703  | -1.236410 | -0.314501 |
| C | 2.872624  | -0.718927 | 0.203558  |

|   |          |           |           |
|---|----------|-----------|-----------|
| H | 1.833650 | -2.259992 | -0.676564 |
| H | 3.773403 | -1.319279 | 0.236412  |
| H | 2.952461 | 0.280593  | 0.603043  |

eq3

```
=====
C  -0.188204    0.883419   -0.179414
C   0.536791   -0.401782   -0.595497
H   0.312619   -0.546285   -1.660813
C   0.260804    1.608668    1.055950
C   0.457107    2.230051   -0.307662
C  -0.068122   -1.583766    0.168306
C  -1.575329   -1.687015   -0.064646
H  -1.759789   -1.892751   -1.123767
H  -1.981916   -2.528775    0.498286
C  -1.684515    0.800463   -0.411561
C  -2.288697   -0.393790    0.325683
H  -2.185212   -0.236916    1.403732
H  -3.356354   -0.468645    0.112738
H   1.144263    1.248059    1.564841
H  -0.502198    2.027249    1.697752
H  -0.185176    3.057302   -0.577021
H   1.467292    2.299978   -0.682813
H   0.124084   -1.453694    1.237962
H  -2.155182    1.730689   -0.087346
H  -1.875306    0.697230   -1.485135
H   0.423952   -2.509623   -0.135842
C   2.033745   -0.307008   -0.483386
C   2.805927   -1.015930    0.331324
H   2.508546    0.408686   -1.147530
H   3.880034   -0.880538    0.334283
H   2.403295   -1.751822    1.016100
```

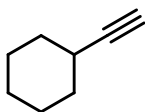

ethynylcyclohexane

| Conformation | Electronic Energy | Enthalpy    | Gibbs Free Energy |
|--------------|-------------------|-------------|-------------------|
| ax           | -311.978154       | -311.789174 | -311.829127       |
| eq           | -311.978675       | -311.789716 | -311.829859       |

ax

|   |           |           |           |
|---|-----------|-----------|-----------|
| C | -0.581804 | 0.574052  | -1.263793 |
| C | 0.084853  | 1.150184  | -0.000000 |
| H | -0.043221 | 2.234179  | -0.000000 |
| C | -0.581804 | 0.574052  | 1.263793  |
| C | -0.581804 | -0.953324 | 1.260830  |
| H | 0.449046  | -1.316354 | 1.311414  |
| H | -1.092073 | -1.321052 | 2.152187  |
| C | -0.581804 | -0.953324 | -1.260830 |
| C | -1.249529 | -1.502670 | 0.000000  |
| H | -2.305362 | -1.213686 | 0.000000  |
| H | -1.216466 | -2.593270 | 0.000000  |
| H | -1.612909 | 0.936089  | 1.283228  |
| H | -1.092073 | -1.321052 | -2.152187 |
| H | 0.449046  | -1.316354 | -1.311414 |
| H | -0.082489 | 0.960167  | 2.152958  |
| H | -0.082489 | 0.960167  | -2.152958 |
| H | -1.612909 | 0.936089  | -1.283228 |
| C | 1.530287  | 0.885154  | -0.000000 |
| C | 2.709112  | 0.658265  | -0.000000 |
| H | 3.756858  | 0.460744  | -0.000000 |

eq

|   |           |           |           |
|---|-----------|-----------|-----------|
| C | 0.014203  | -1.264831 | -0.141007 |
| C | 0.695994  | 0.000070  | 0.407766  |
| H | 0.587456  | 0.000061  | 1.497038  |
| C | 0.014089  | 1.264904  | -0.141040 |
| C | -1.479018 | 1.259158  | 0.180033  |
| H | -1.611851 | 1.304693  | 1.265305  |
| H | -1.947585 | 2.151752  | -0.236928 |
| C | -1.478906 | -1.259255 | 0.180060  |
| C | -2.157772 | -0.000079 | -0.357087 |
| H | -2.099618 | -0.000110 | -1.449985 |
| H | -3.216282 | -0.000113 | -0.092690 |
| H | 0.158701  | 1.293215  | -1.224866 |
| H | -1.947363 | -2.151893 | -0.236919 |
| H | -1.611737 | -1.304788 | 1.265326  |
| H | 0.495143  | 2.150601  | 0.275391  |
| C | 2.128848  | 0.000236  | 0.100513  |



|   |          |           |           |
|---|----------|-----------|-----------|
| C | 3.296572 | -0.000158 | -0.177981 |
| H | 4.334933 | -0.000069 | -0.419825 |
| H | 0.495356 | -2.150463 | 0.275441  |
| H | 0.158786 | -1.293150 | -1.224834 |

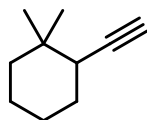

2-ethynyl-1,1-dimethylcyclohexane

| Conformation | Electronic Energy | Enthalpy    | Gibbs Free Energy |
|--------------|-------------------|-------------|-------------------|
| ax           | -390.592901       | -390.345289 | -390.39064        |
| eq           | -390.594048       | -390.346536 | -390.392177       |

ax

|   |           |           |           |
|---|-----------|-----------|-----------|
| C | -0.575206 | -0.839304 | -0.019827 |
| C | 0.573847  | -0.177821 | -0.837507 |
| H | 0.670486  | -0.731204 | -1.775805 |
| C | 0.276567  | 1.301445  | -1.161148 |
| C | -0.022749 | 2.106053  | 0.101923  |
| H | 0.873546  | 2.140438  | 0.728350  |
| H | -0.262241 | 3.135850  | -0.166826 |
| C | -0.877546 | 0.015721  | 1.221614  |
| C | -1.168419 | 1.481975  | 0.898272  |
| H | -2.095682 | 1.562525  | 0.325524  |
| H | -1.324280 | 2.035690  | 1.825522  |
| H | -0.578495 | 1.344376  | -1.837159 |
| H | -1.719018 | -0.431298 | 1.756923  |
| H | -0.013834 | -0.031853 | 1.892736  |
| H | 1.126900  | 1.727329  | -1.694629 |
| C | 1.868411  | -0.274948 | -0.146942 |
| C | 2.928047  | -0.325447 | 0.414803  |
| H | 3.869741  | -0.377796 | 0.911900  |
| C | -1.815153 | -0.961696 | -0.912696 |
| H | -1.596293 | -1.584997 | -1.782280 |
| H | -2.624366 | -1.436089 | -0.354409 |
| H | -2.179920 | -0.001438 | -1.272060 |
| C | -0.173105 | -2.247690 | 0.417766  |
| H | -1.011409 | -2.736739 | 0.917603  |
| H | 0.108731  | -2.857483 | -0.443930 |
| H | 0.667969  | -2.227044 | 1.110986  |

eq

|   |          |          |           |
|---|----------|----------|-----------|
| C | 0.064272 | 0.883248 | -0.020282 |
|---|----------|----------|-----------|

|   |           |           |           |
|---|-----------|-----------|-----------|
| C | 0.515043  | -0.536755 | -0.469735 |
| H | 0.399732  | -0.568948 | -1.558772 |
| C | -0.361141 | -1.657284 | 0.120133  |
| C | -1.830444 | -1.444238 | -0.232103 |
| H | -1.952235 | -1.527557 | -1.316549 |
| H | -2.436460 | -2.230877 | 0.219627  |
| C | -1.428147 | 1.032037  | -0.364729 |
| C | -2.311793 | -0.067830 | 0.220751  |
| H | -2.299463 | -0.018252 | 1.312463  |
| H | -3.345964 | 0.090098  | -0.089397 |
| H | -0.234890 | -1.681928 | 1.204788  |
| H | -1.765358 | 2.014430  | -0.025213 |
| H | -1.530591 | 1.020028  | -1.455088 |
| H | -0.011523 | -2.616608 | -0.263089 |
| C | 1.929791  | -0.790898 | -0.175391 |
| C | 3.079337  | -1.018092 | 0.085451  |
| H | 4.101827  | -1.218588 | 0.311451  |
| C | 0.297491  | 1.098714  | 1.477343  |
| H | 1.361135  | 1.045291  | 1.714739  |
| H | -0.060615 | 2.088989  | 1.765427  |
| H | -0.220810 | 0.364908  | 2.093267  |
| C | 0.853247  | 1.936925  | -0.797290 |
| H | 0.499827  | 2.937423  | -0.540179 |
| H | 1.918188  | 1.886357  | -0.564501 |
| H | 0.731270  | 1.800267  | -1.873850 |

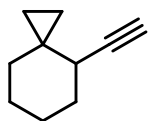

#### 4-ethynylspiro[2.5]octane

R-Group: acetylenyl Variant: cyclopropyl

| Conformation | Electronic Energy | Enthalpy    | Gibbs Free Energy |
|--------------|-------------------|-------------|-------------------|
| ax           | -389.361765       | -389.137353 | -389.181301       |
| eq           | -389.361407       | -389.137058 | -389.180935       |

ax

|   |           |           |           |
|---|-----------|-----------|-----------|
| C | -0.898183 | 0.238700  | -0.058938 |
| C | 0.333616  | 0.608951  | 0.761983  |
| H | 0.011994  | 1.195633  | 1.625397  |
| C | -2.184016 | 0.075889  | 0.696615  |
| C | -1.976249 | 1.262542  | -0.215841 |
| C | 1.037994  | -0.669117 | 1.256780  |
| C | 1.349694  | -1.624585 | 0.106098  |
| H | 2.072400  | -1.156335 | -0.568832 |

|   |           |           |           |
|---|-----------|-----------|-----------|
| H | 1.819756  | -2.527188 | 0.498646  |
| C | -0.610377 | -0.720495 | -1.193841 |
| C | 0.084937  | -1.980817 | -0.676269 |
| H | -0.601831 | -2.524617 | -0.020433 |
| H | 0.329143  | -2.643365 | -1.507805 |
| H | -2.173994 | 0.257536  | 1.762445  |
| H | -2.861899 | -0.699406 | 0.367449  |
| H | -2.519219 | 1.279226  | -1.150527 |
| H | -1.825405 | 2.227984  | 0.247674  |
| H | 0.364021  | -1.159196 | 1.963825  |
| H | -1.543773 | -0.972945 | -1.699808 |
| H | 0.033563  | -0.227996 | -1.929807 |
| H | 1.946253  | -0.402594 | 1.797842  |
| C | 1.248907  | 1.450741  | -0.023930 |
| C | 1.995511  | 2.128114  | -0.675214 |
| H | 2.657991  | 2.733722  | -1.250732 |

eq

```
=====
```

|   |           |           |           |
|---|-----------|-----------|-----------|
| C | 0.031047  | 0.813124  | -0.184590 |
| C | 0.469377  | -0.622187 | -0.481025 |
| H | 0.311461  | -0.799164 | -1.550653 |
| C | 0.591593  | 1.518153  | 1.014880  |
| C | 0.978111  | 1.954506  | -0.379386 |
| C | -0.416053 | -1.613344 | 0.299026  |
| C | -1.893121 | -1.394187 | -0.020514 |
| H | -2.066880 | -1.617822 | -1.077569 |
| H | -2.500491 | -2.091762 | 0.557836  |
| C | -1.434755 | 1.031213  | -0.501076 |
| C | -2.316738 | 0.045703  | 0.264878  |
| H | -2.225708 | 0.242660  | 1.337231  |
| H | -3.364300 | 0.192440  | -0.002098 |
| H | 1.347112  | 1.012046  | 1.599745  |
| H | -0.079219 | 2.153250  | 1.576520  |
| H | 0.564901  | 2.881871  | -0.750787 |
| H | 1.985788  | 1.734560  | -0.702892 |
| H | -0.240091 | -1.464297 | 1.367979  |
| H | -1.705965 | 2.060362  | -0.259769 |
| H | -1.592669 | 0.897433  | -1.576514 |
| H | -0.117141 | -2.633583 | 0.056757  |
| C | 1.886433  | -0.866570 | -0.200522 |
| C | 3.040208  | -1.081971 | 0.048444  |
| H | 4.066598  | -1.274646 | 0.263527  |

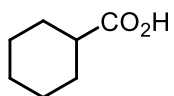

cyclohexanecarboxylic acid

| Conformation | Electronic Energy | Enthalpy    | Gibbs Free Energy |
|--------------|-------------------|-------------|-------------------|
| ax           | -424.419630       | -424.223908 | -424.266561       |
| eq           | -424.420732       | -424.225036 | -424.26841        |
| eq2          | -424.419851       | -424.223994 | -424.267488       |

ax

|   |           |           |           |
|---|-----------|-----------|-----------|
| C | 0.597651  | -1.184639 | 0.902086  |
| C | -0.385725 | -0.012669 | 0.927037  |
| H | -0.896438 | 0.015625  | 1.894682  |
| C | 0.345900  | 1.322703  | 0.722386  |
| C | 1.171635  | 1.310395  | -0.563114 |
| H | 1.690996  | 2.262720  | -0.678259 |
| H | 0.503012  | 1.207447  | -1.425092 |
| C | 1.457831  | -1.184973 | -0.363358 |
| C | 2.170657  | 0.153363  | -0.557450 |
| H | 2.884102  | 0.305128  | 0.258769  |
| H | 2.743988  | 0.142903  | -1.485750 |
| H | 1.013310  | 1.466692  | 1.575451  |
| H | 0.821896  | -1.381594 | -1.230086 |
| H | 2.184557  | -1.997070 | -0.310867 |
| H | -0.363522 | 2.148327  | 0.723159  |
| H | 1.245569  | -1.090285 | 1.776933  |
| H | 0.058048  | -2.126320 | 0.996506  |
| C | -1.501256 | -0.212008 | -0.076725 |
| O | -1.752538 | -1.236773 | -0.658652 |
| O | -2.254962 | 0.889556  | -0.238826 |
| H | -2.965664 | 0.671125  | -0.860785 |

eq

|   |           |           |           |
|---|-----------|-----------|-----------|
| C | 0.260896  | 1.184163  | 0.385519  |
| C | -0.356409 | -0.008185 | -0.370500 |
| H | -0.317043 | 0.215987  | -1.440414 |
| C | 0.413201  | -1.294347 | -0.082969 |
| C | 1.889786  | -1.133491 | -0.440906 |
| H | 2.427515  | -2.054256 | -0.210674 |
| H | 1.984107  | -0.968869 | -1.518726 |
| C | 1.739423  | 1.335583  | 0.032315  |
| C | 2.512945  | 0.046397  | 0.303813  |
| H | 3.558117  | 0.166907  | 0.014813  |
| H | 2.498615  | -0.160449 | 1.378459  |
| H | 0.317529  | -1.530081 | 0.979794  |
| H | 1.826869  | 1.591950  | -1.027851 |
| H | 2.167807  | 2.163738  | 0.598761  |

|   |           |           |           |
|---|-----------|-----------|-----------|
| H | -0.029612 | -2.123831 | -0.635924 |
| H | -0.284554 | 2.097682  | 0.148860  |
| H | 0.157222  | 1.006705  | 1.460495  |
| C | -1.808286 | -0.134447 | 0.004112  |
| O | -2.282749 | -0.979071 | 0.720866  |
| O | -2.560338 | 0.841451  | -0.534700 |
| H | -3.471213 | 0.721445  | -0.225221 |

eq2

```

=====
C  -0.313976    1.255490   -0.173099
C   0.357795    0.009722    0.426120
H   0.271128    0.051583    1.512968
C  -0.325633   -1.268020   -0.081781
C  -1.813546   -1.246824    0.264622
H  -2.292336   -2.150275   -0.115582
H  -1.929046   -1.256121    1.352606
C  -1.802329    1.272803    0.171536
C  -2.495805   -0.003243   -0.304454
H  -3.548946    0.012188   -0.019885
H  -2.459159   -0.043776   -1.397505
H  -0.204004   -1.328653   -1.165915
H  -1.917989    1.363794    1.255692
H  -2.272531    2.149985   -0.275176
H   0.157047   -2.145611    0.351977
H   0.176390    2.156977    0.198527
H  -0.189744    1.237161   -1.258736
C   1.832438    0.004040    0.132971
O   2.708574    0.094139    0.956992
O   2.104821   -0.106284   -1.178235
H   3.068370   -0.093903   -1.284511

```

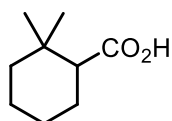

2,2-dimethylcyclohexane-1-carboxylic acid

| Conformation | Electronic Energy | Enthalpy    | Gibbs Free Energy |
|--------------|-------------------|-------------|-------------------|
| ax           | -503.032449       | -502.777841 | -502.825876       |
| ax2          | -503.031490       | -502.776828 | -502.82471        |
| eq           | -503.034693       | -502.780146 | -502.828144       |
| eq2          | -503.033947       | -502.779408 | -502.827409       |

ax

```

=====
C  -0.423890    1.025911   -0.017096
C   0.422083   -0.026623    0.760533
H   0.819051    0.466743    1.648084
C  -0.406012   -1.248702    1.201860

```

|   |           |           |           |
|---|-----------|-----------|-----------|
| C | -1.241112 | -1.865891 | 0.080087  |
| H | -1.866214 | -2.658000 | 0.495784  |
| H | -0.581363 | -2.325798 | -0.656533 |
| C | -1.249191 | 0.343538  | -1.120596 |
| C | -2.106874 | -0.813644 | -0.610314 |
| H | -2.860997 | -0.441836 | 0.088048  |
| H | -2.647316 | -1.263646 | -1.444695 |
| H | -1.070569 | -0.923742 | 2.004579  |
| H | -0.566569 | -0.035293 | -1.885733 |
| H | -1.875617 | 1.102098  | -1.596926 |
| H | 0.261585  | -1.996002 | 1.635050  |
| C | 1.616346  | -0.462777 | -0.053421 |
| O | 1.596542  | -1.177275 | -1.025059 |
| O | 2.771053  | 0.040850  | 0.419414  |
| H | 3.485850  | -0.269481 | -0.158293 |
| C | -1.344605 | 1.735846  | 0.982074  |
| H | -0.753766 | 2.282707  | 1.719372  |
| H | -1.977776 | 2.453396  | 0.456636  |
| H | -1.994961 | 1.046824  | 1.518516  |
| C | 0.489955  | 2.078775  | -0.647678 |
| H | 1.124016  | 2.550802  | 0.105631  |
| H | 1.134568  | 1.646515  | -1.416139 |
| H | -0.110878 | 2.857523  | -1.120916 |

ax2

```
=====
```

|   |           |           |           |
|---|-----------|-----------|-----------|
| C | -0.493996 | 1.005711  | -0.019339 |
| C | 0.428975  | 0.042737  | 0.784574  |
| H | 0.739482  | 0.571472  | 1.686034  |
| C | -0.282240 | -1.259739 | 1.208843  |
| C | -1.065315 | -1.944880 | 0.088623  |
| H | -1.616439 | -2.788116 | 0.508204  |
| H | -0.377370 | -2.349669 | -0.654755 |
| C | -1.273850 | 0.254574  | -1.112290 |
| C | -2.024490 | -0.970048 | -0.591063 |
| H | -2.797025 | -0.662588 | 0.118423  |
| H | -2.536930 | -1.464452 | -1.417866 |
| H | -0.973418 | -1.003312 | 2.013984  |
| H | -0.578220 | -0.063525 | -1.891949 |
| H | -1.970324 | 0.958486  | -1.574941 |
| H | 0.451091  | -1.945122 | 1.638461  |
| C | 1.731767  | -0.246259 | 0.078854  |
| O | 2.815749  | 0.104075  | 0.476599  |
| O | 1.602892  | -0.955237 | -1.055812 |
| H | 2.491585  | -1.086364 | -1.422122 |
| C | -1.469437 | 1.656577  | 0.969712  |
| H | -0.925292 | 2.267263  | 1.692503  |
| H | -2.164181 | 2.305573  | 0.433199  |
| H | -2.055568 | 0.924533  | 1.523777  |
| C | 0.337731  | 2.116757  | -0.663246 |
| H | 0.934199  | 2.643785  | 0.084526  |
| H | 1.013432  | 1.725242  | -1.426783 |
| H | -0.319023 | 2.843511  | -1.144995 |

eq

```
=====
C  0.290359    0.938906    0.055224
C -0.322424   -0.412247   -0.425452
H -0.302218   -0.390621   -1.517593
C  0.474822   -1.628519    0.058013
C  1.926013   -1.544670   -0.407537
H  2.486013   -2.402056   -0.031584
H  1.954213   -1.597276   -1.500340
C  1.755784    0.963419   -0.416722
C  2.575191   -0.239456    0.046844
H  3.589072   -0.165385   -0.349718
H  2.662468   -0.235308    1.136239
H  0.431384   -1.684121    1.146581
H  1.762168    0.993140   -1.511376
H  2.213147    1.893242   -0.069813
H  0.005878   -2.537123   -0.323884
C -1.764963   -0.542089   -0.009790
O -2.151127   -0.954972    1.055243
O -2.624360   -0.147801   -0.966111
H -3.523354   -0.245013   -0.614951
C -0.447938    2.110788   -0.594037
H -0.461091    2.013818   -1.681305
H -1.479827    2.179140   -0.245772
H  0.051789    3.048194   -0.341785
C  0.216373    1.100672    1.576787
H  0.726939    2.021790    1.865118
H -0.817920    1.171435    1.914345
H  0.685926    0.277504    2.112803
```

eq2

```
=====
C  0.303284    0.948416    0.060173
C -0.321384   -0.368564   -0.495482
H -0.243411   -0.307460   -1.583474
C  0.419283   -1.625752   -0.022655
C  1.891668   -1.565122   -0.419460
H  2.409057   -2.455598   -0.059780
H  1.970844   -1.565998   -1.510979
C  1.793714    0.942682   -0.327864
C  2.550579   -0.302214    0.129815
H  3.588037   -0.241812   -0.202851
H  2.571278   -0.347667    1.221778
H  0.334147   -1.722939    1.060332
H  1.862821    1.013926   -1.418357
H  2.257555    1.843962    0.080279
H -0.056401   -2.506401   -0.458111
C -1.801391   -0.442170   -0.216871
O -2.664874   -0.046710   -0.961153
O -2.099615   -1.002994    0.967421
H -3.064624   -0.993293    1.062919
C -0.359847    2.160159   -0.596782
H -0.299059    2.098812   -1.685048
H -1.411536    2.243729   -0.319961
```

|   |           |          |           |
|---|-----------|----------|-----------|
| H | 0.144651  | 3.074801 | -0.278803 |
| C | 0.146101  | 1.071051 | 1.579390  |
| H | 0.685840  | 1.954031 | 1.927388  |
| H | -0.901824 | 1.191061 | 1.856929  |
| H | 0.536495  | 0.207568 | 2.116010  |

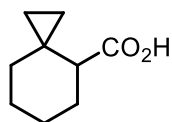

spiro[2.5]octane-4-carboxylic acid

| Conformation | Electronic Energy | Enthalpy    | Gibbs Free Energy |
|--------------|-------------------|-------------|-------------------|
| ax           | -501.802628       | -501.571481 | -501.618258       |
| ax2          | -501.802281       | -501.57125  | -501.617866       |
| eq           | -501.801911       | -501.570521 | -501.617247       |
| eq2          | -501.800812       | -501.569499 | -501.616193       |

ax

|   |           |           |           |
|---|-----------|-----------|-----------|
| C | -0.919249 | -0.592721 | -0.041025 |
| C | 0.400882  | -0.251211 | -0.701181 |
| H | 0.542629  | -0.884706 | -1.581709 |
| C | -2.007656 | -1.089365 | -0.951605 |
| C | -1.332447 | -2.027697 | 0.018903  |
| C | 0.411973  | 1.222513  | -1.146284 |
| C | 0.072764  | 2.152997  | 0.017783  |
| H | 0.845607  | 2.070458  | 0.790151  |
| H | 0.079313  | 3.188142  | -0.325685 |
| C | -1.316937 | 0.342025  | 1.084029  |
| C | -1.286699 | 1.800125  | 0.622420  |
| H | -2.063038 | 1.956726  | -0.132838 |
| H | -1.512899 | 2.462299  | 1.459394  |
| H | -1.779610 | -1.203364 | -2.002437 |
| H | -3.020234 | -0.781203 | -0.731308 |
| H | -1.895573 | -2.349386 | 0.883875  |
| H | -0.652115 | -2.763957 | -0.386605 |
| H | -0.342754 | 1.333957  | -1.928255 |
| H | -2.312443 | 0.071750  | 1.440937  |
| H | -0.625084 | 0.212885  | 1.920001  |
| H | 1.376034  | 1.476952  | -1.583556 |
| C | 1.579818  | -0.558343 | 0.199634  |
| O | 1.534541  | -1.041589 | 1.301285  |
| O | 2.751008  | -0.245885 | -0.384989 |
| H | 3.461080  | -0.480697 | 0.231624  |

ax2

|   |           |           |          |
|---|-----------|-----------|----------|
| C | 0.844598  | -0.620367 | 0.010966 |
| C | -0.387529 | -0.165902 | 0.776492 |
| H | -0.492552 | -0.789705 | 1.670407 |



|   |           |           |           |
|---|-----------|-----------|-----------|
| C | 2.012831  | -1.094037 | 0.830148  |
| C | 1.214236  | -2.067825 | -0.000041 |
| C | -0.245063 | 1.304145  | 1.182217  |
| C | 0.066371  | 2.194180  | -0.023624 |
| H | -0.792568 | 2.195918  | -0.699812 |
| H | 0.210627  | 3.222878  | 0.309634  |
| C | 1.144614  | 0.241763  | -1.197234 |
| C | 1.301512  | 1.705656  | -0.781554 |
| H | 2.181605  | 1.798536  | -0.138081 |
| H | 1.476582  | 2.330411  | -1.658693 |
| H | 1.895497  | -1.136161 | 1.904212  |
| H | 3.002500  | -0.827410 | 0.485897  |
| H | 1.670286  | -2.458075 | -0.899402 |
| H | 0.564496  | -2.756354 | 0.520655  |
| H | 0.574245  | 1.369990  | 1.901808  |
| H | 2.048538  | -0.120741 | -1.689628 |
| H | 0.325614  | 0.153828  | -1.920526 |
| H | -1.150893 | 1.642778  | 1.683039  |
| C | -1.675686 | -0.389899 | 0.004575  |
| O | -2.609806 | 0.370887  | -0.026536 |
| O | -1.713716 | -1.573900 | -0.626871 |
| H | -2.581104 | -1.648070 | -1.053917 |

eq

```
=====
```

|   |           |           |           |
|---|-----------|-----------|-----------|
| C | -0.323260 | 0.871983  | -0.141893 |
| C | 0.291109  | -0.503177 | -0.415402 |
| H | 0.239924  | -0.676405 | -1.493092 |
| C | 0.027310  | 1.611101  | 1.116605  |
| C | 0.495821  | 2.122553  | -0.226398 |
| C | -0.517497 | -1.584437 | 0.309590  |
| C | -1.981359 | -1.542267 | -0.126304 |
| H | -2.044858 | -1.789340 | -1.190468 |
| H | -2.547282 | -2.303575 | 0.412202  |
| C | -1.771157 | 0.924514  | -0.587234 |
| C | -2.593694 | -0.161494 | 0.106464  |
| H | -2.620848 | 0.043987  | 1.180694  |
| H | -3.623779 | -0.139215 | -0.252111 |
| H | 0.771054  | 1.186856  | 1.775580  |
| H | -0.770973 | 2.148640  | 1.609242  |
| H | 0.013967  | 3.003341  | -0.627484 |
| H | 1.549924  | 2.040595  | -0.452103 |
| H | -0.442738 | -1.412028 | 1.385581  |
| H | -2.178208 | 1.913791  | -0.371108 |
| H | -1.819469 | 0.781557  | -1.671637 |
| H | -0.086127 | -2.565756 | 0.105759  |
| C | 1.744568  | -0.564173 | -0.022905 |
| O | 2.161404  | -0.808944 | 1.080914  |
| O | 2.569560  | -0.307995 | -1.051682 |
| H | 3.480649  | -0.344538 | -0.720042 |

eq2

```

=====
C  -0.335934    0.887862   -0.130389
C   0.287096   -0.464720   -0.487553
H   0.184844   -0.588911   -1.568596
C   0.080335    1.604358    1.121755
C   0.449337    2.157910   -0.236027
C  -0.471199   -1.594333    0.220600
C  -1.952172   -1.560581   -0.152784
H  -2.057189   -1.749133   -1.225578
H  -2.480280   -2.361739    0.365876
C  -1.807860    0.928296   -0.492166
C  -2.575509   -0.206955    0.184390
H  -2.551106   -0.059175    1.268225
H  -3.622779   -0.184971   -0.120318
H   0.873662    1.184578    1.723247
H  -0.694028    2.113088    1.679043
H  -0.078768    3.035693   -0.581567
H   1.487010    2.102668   -0.532916
H  -0.362933   -1.472419    1.300446
H  -2.220484    1.897285   -0.206071
H  -1.910691    0.838510   -1.578545
H  -0.031132   -2.556838   -0.044732
C   1.773185   -0.499488   -0.232841
O   2.612173   -0.182347   -1.038782
O   2.101739   -0.919664    0.998833
H   3.068905   -0.896635    1.071169
=====

```

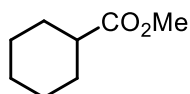

methyl cyclohexanecarboxylate

| Conformation | Electronic Energy | Enthalpy    | Gibbs Free Energy |
|--------------|-------------------|-------------|-------------------|
| ax           | -463.708541       | -463.4829   | -463.529122       |
| eq           | -463.709674       | -463.484125 | -463.531404       |
| eq2          | -463.708766       | -463.483065 | -463.530427       |

ax

```

=====
C   1.234524   -1.220319    0.746046
C   0.138937   -0.191583    1.035580
H  -0.219260   -0.321889    2.061492
C   0.679779    1.237814    0.884913
C   1.298110    1.453548   -0.495695
H   1.685573    2.470369   -0.573730
H   0.521998    1.349896   -1.262283
C   1.886154   -0.993519   -0.619610
C   2.408211    0.436428   -0.760404
=====

```

|   |           |           |           |
|---|-----------|-----------|-----------|
| H | 3.216724  | 0.598361  | -0.040389 |
| H | 2.830888  | 0.586661  | -1.755138 |
| H | 1.449016  | 1.382446  | 1.647647  |
| H | 1.150525  | -1.185770 | -1.404651 |
| H | 2.697923  | -1.708685 | -0.761469 |
| H | -0.108036 | 1.963714  | 1.077219  |
| C | -1.085661 | -0.440912 | 0.174747  |
| O | -1.305336 | -1.448329 | -0.451679 |
| O | -1.951017 | 0.578975  | 0.218280  |
| C | -3.161016 | 0.397393  | -0.524066 |
| H | -3.712280 | -0.462111 | -0.148010 |
| H | -3.736696 | 1.306115  | -0.379564 |
| H | -2.940212 | 0.254996  | -1.579981 |
| H | 1.993724  | -1.124005 | 1.526269  |
| H | 0.826710  | -2.228365 | 0.810705  |

eq

```
=====
```

|   |           |           |           |
|---|-----------|-----------|-----------|
| C | 0.606766  | 1.143386  | 0.428377  |
| C | 0.064787  | -0.071140 | -0.348527 |
| H | 0.061222  | 0.182475  | -1.411750 |
| C | 0.941179  | -1.299345 | -0.113900 |
| C | 2.390720  | -1.012638 | -0.502731 |
| H | 3.005662  | -1.893214 | -0.311573 |
| H | 2.443432  | -0.813066 | -1.577492 |
| C | 2.058741  | 1.423820  | 0.044891  |
| C | 2.938601  | 0.193290  | 0.259526  |
| H | 3.962952  | 0.404114  | -0.051559 |
| H | 2.969543  | -0.042664 | 1.327813  |
| H | 0.891604  | -1.568329 | 0.943942  |
| H | 2.098363  | 1.715894  | -1.008885 |
| H | 2.435314  | 2.267298  | 0.625480  |
| H | 0.551193  | -2.147334 | -0.679025 |
| C | -1.363332 | -0.318995 | 0.064358  |
| O | -1.726650 | -1.144075 | 0.866368  |
| O | -2.209874 | 0.522703  | -0.541513 |
| C | -3.584229 | 0.402965  | -0.159451 |
| H | -4.118155 | 1.154250  | -0.732474 |
| H | -3.959226 | -0.590129 | -0.398468 |
| H | -3.699655 | 0.589308  | 0.906356  |
| H | -0.015877 | 2.017255  | 0.234005  |
| H | 0.546423  | 0.927060  | 1.499533  |

eq2

```
=====
```

|   |          |           |           |
|---|----------|-----------|-----------|
| C | 0.693461 | -1.261781 | -0.064282 |
| C | 0.099586 | 0.000038  | 0.578750  |
| H | 0.341003 | -0.000220 | 1.643150  |
| C | 0.693556 | 1.261828  | -0.063976 |
| C | 2.215910 | 1.260594  | 0.067211  |
| H | 2.627522 | 2.151522  | -0.409285 |
| H | 2.484626 | 1.310498  | 1.126718  |
| C | 2.215786 | -1.260694 | 0.067064  |
| C | 2.822940 | -0.000041 | -0.547782 |

|   |           |           |           |
|---|-----------|-----------|-----------|
| H | 3.905925  | -0.000086 | -0.415026 |
| H | 2.631695  | 0.000018  | -1.625411 |
| H | 0.417904  | 1.283382  | -1.121159 |
| H | 2.484402  | -1.310709 | 1.126589  |
| H | 2.627410  | -2.151604 | -0.409465 |
| H | 0.269242  | 2.152341  | 0.403538  |
| C | -1.405288 | 0.000035  | 0.502357  |
| O | -2.147086 | -0.000255 | 1.455379  |
| O | -1.851100 | 0.000313  | -0.758596 |
| C | -3.273645 | -0.000001 | -0.916779 |
| H | -3.453191 | -0.000678 | -1.987187 |
| H | -3.705733 | -0.888665 | -0.461308 |
| H | -3.705952 | 0.889142  | -0.462418 |
| H | 0.268921  | -2.152240 | 0.403108  |
| H | 0.417885  | -1.283028 | -1.121478 |

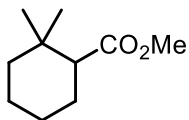

methyl 2,2-dimethylcyclohexane-1-carboxylate

| Conformation | Electronic Energy | Enthalpy    | Gibbs Free Energy |
|--------------|-------------------|-------------|-------------------|
| ax           | -542.321673       | -542.037245 | -542.088728       |
| ax2          | -542.320547       | -542.036014 | -542.087415       |
| eq           | -542.323810       | -542.03946  | -542.091244       |
| eq2          | -542.322965       | -542.038654 | -542.090413       |

ax

|   |           |           |           |
|---|-----------|-----------|-----------|
| C | 0.812591  | -1.014049 | -0.021844 |
| C | -0.036238 | 0.001313  | 0.800518  |
| H | -0.370403 | -0.511346 | 1.703102  |
| C | 0.763162  | 1.252856  | 1.209021  |
| C | 1.519133  | 1.907592  | 0.052595  |
| H | 2.131120  | 2.723046  | 0.442028  |
| H | 0.806810  | 2.341683  | -0.649931 |
| C | 1.557919  | -0.295317 | -1.158819 |
| C | 2.392679  | 0.892803  | -0.682624 |
| H | 3.192355  | 0.548588  | -0.021573 |
| H | 2.876249  | 1.366377  | -1.538676 |
| H | 1.478486  | 0.953183  | 1.977467  |
| H | 0.825247  | 0.059871  | -1.888185 |
| H | 2.190486  | -1.026365 | -1.669003 |
| H | 0.087521  | 1.971462  | 1.677100  |
| C | -1.286312 | 0.387251  | 0.043981  |
| O | -1.336272 | 1.116196  | -0.917515 |
| O | -2.380322 | -0.190911 | 0.559242  |

|   |           |           |           |
|---|-----------|-----------|-----------|
| C | 1.807235  | -1.693383 | 0.926380  |
| H | 1.274384  | -2.267111 | 1.687128  |
| H | 2.442415  | -2.382610 | 0.366392  |
| H | 2.455072  | -0.981998 | 1.436162  |
| C | -0.088932 | -2.098093 | -0.616916 |
| H | -0.664655 | -2.602024 | 0.162011  |
| H | -0.789357 | -1.685390 | -1.346745 |
| H | 0.517688  | -2.847519 | -1.128790 |
| C | -3.604782 | 0.079878  | -0.130507 |
| H | -3.546000 | -0.272624 | -1.158641 |
| H | -4.375318 | -0.461349 | 0.409173  |
| H | -3.818062 | 1.146745  | -0.123542 |

ax2

```
=====
```

|   |           |           |           |
|---|-----------|-----------|-----------|
| C | 0.997064  | -0.881793 | -0.178231 |
| C | 0.079598  | -0.279470 | 0.926706  |
| H | 0.117301  | -0.957201 | 1.780162  |
| C | 0.541615  | 1.114437  | 1.400122  |
| C | 0.867425  | 2.089448  | 0.268598  |
| H | 1.283022  | 3.003076  | 0.697082  |
| H | -0.045991 | 2.367961  | -0.258485 |
| C | 1.314427  | 0.152931  | -1.271978 |
| C | 1.852384  | 1.473442  | -0.722820 |
| H | 2.814122  | 1.310674  | -0.229266 |
| H | 2.036156  | 2.164726  | -1.546958 |
| H | 1.438010  | 0.971634  | 2.007116  |
| H | 0.406986  | 0.353480  | -1.845683 |
| H | 2.035701  | -0.293584 | -1.961382 |
| H | -0.215926 | 1.536801  | 2.063518  |
| C | -1.382109 | -0.283577 | 0.538848  |
| O | -2.225198 | -0.955050 | 1.084462  |
| O | -1.671767 | 0.537504  | -0.476900 |
| C | 2.294824  | -1.353016 | 0.490173  |
| H | 2.085768  | -2.151676 | 1.204295  |
| H | 2.981507  | -1.743906 | -0.263184 |
| H | 2.804846  | -0.551813 | 1.023455  |
| C | 0.322635  | -2.098878 | -0.814589 |
| H | 0.050537  | -2.837318 | -0.057349 |
| H | -0.581657 | -1.819418 | -1.360259 |
| H | 1.002277  | -2.575860 | -1.523312 |
| C | -3.040677 | 0.547326  | -0.896642 |
| H | -3.686146 | 0.867452  | -0.081483 |
| H | -3.093115 | 1.254112  | -1.718754 |
| H | -3.340803 | -0.443871 | -1.231132 |

eq

```
=====
```

|   |           |           |           |
|---|-----------|-----------|-----------|
| C | 0.682620  | 0.938605  | 0.049990  |
| C | -0.002633 | -0.398966 | -0.361726 |
| H | -0.048289 | -0.400342 | -1.453232 |
| C | 0.785106  | -1.630708 | 0.096938  |
| C | 2.205067  | -1.603928 | -0.463073 |
| H | 2.762709  | -2.470004 | -0.103713 |

|   |           |           |           |
|---|-----------|-----------|-----------|
| H | 2.159840  | -1.682121 | -1.553786 |
| C | 2.112471  | 0.909066  | -0.520048 |
| C | 2.923718  | -0.310337 | -0.085030 |
| H | 3.910079  | -0.278285 | -0.550689 |
| H | 3.085397  | -0.285386 | 0.995547  |
| H | 0.810632  | -1.662826 | 1.187091  |
| H | 2.045937  | 0.916180  | -1.613109 |
| H | 2.621316  | 1.830371  | -0.225808 |
| H | 0.264856  | -2.531650 | -0.233724 |
| C | -1.422252 | -0.470426 | 0.143778  |
| O | -1.746253 | -0.804050 | 1.257820  |
| O | -2.315258 | -0.117679 | -0.790251 |
| C | -0.066754 | 2.119111  | -0.570312 |
| H | -0.151264 | 2.006695  | -1.652890 |
| H | -1.073593 | 2.215683  | -0.159176 |
| H | 0.467568  | 3.048827  | -0.364526 |
| C | 0.718833  | 1.131711  | 1.569583  |
| H | 1.281104  | 2.038168  | 1.803408  |
| H | -0.286678 | 1.246206  | 1.974352  |
| H | 1.193393  | 0.301431  | 2.090093  |
| C | -3.683023 | -0.115499 | -0.368087 |
| H | -4.260653 | 0.189923  | -1.234618 |
| H | -3.983018 | -1.110604 | -0.046238 |
| H | -3.826156 | 0.589783  | 0.448392  |

eq2

```
=====
```

|   |           |           |           |
|---|-----------|-----------|-----------|
| C | 0.757009  | 0.932262  | 0.123846  |
| C | 0.030114  | -0.220225 | -0.634845 |
| H | 0.259258  | -0.080610 | -1.694237 |
| C | 0.517836  | -1.610876 | -0.210721 |
| C | 2.023940  | -1.744507 | -0.418843 |
| H | 2.356769  | -2.732013 | -0.095905 |
| H | 2.249618  | -1.662525 | -1.486630 |
| C | 2.270729  | 0.730043  | -0.075861 |
| C | 2.774290  | -0.651062 | 0.337342  |
| H | 3.845668  | -0.722912 | 0.143132  |
| H | 2.638069  | -0.793216 | 1.412675  |
| H | 0.275624  | -1.786033 | 0.838105  |
| H | 2.498145  | 0.882803  | -1.136113 |
| H | 2.797739  | 1.510835  | 0.478107  |
| H | -0.015241 | -2.368165 | -0.788582 |
| C | -1.471353 | -0.082267 | -0.540373 |
| O | -2.152820 | 0.533890  | -1.324835 |
| O | -1.990661 | -0.712531 | 0.519246  |
| C | 0.372027  | 2.284814  | -0.478360 |
| H | 0.571156  | 2.307243  | -1.551519 |
| H | -0.684147 | 2.508597  | -0.325222 |
| H | 0.956022  | 3.078209  | -0.007319 |
| C | 0.411025  | 0.948565  | 1.616450  |
| H | 1.013883  | 1.707271  | 2.119613  |
| H | -0.638967 | 1.200599  | 1.772631  |
| H | 0.600294  | -0.006825 | 2.103840  |
| C | -3.405383 | -0.578790 | 0.687753  |

|   |           |           |           |
|---|-----------|-----------|-----------|
| H | -3.651926 | -1.140504 | 1.583097  |
| H | -3.674816 | 0.468268  | 0.812613  |
| H | -3.930707 | -0.989642 | -0.171902 |

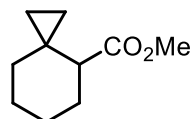

methyl spiro[2.5]octane-4-carboxylate

| Conformation | Electronic Energy | Enthalpy    | Gibbs Free Energy |
|--------------|-------------------|-------------|-------------------|
| ax           | -541.091510       | -540.830473 | -540.880691       |
| ax2          | -541.091122       | -540.83028  | -540.880968       |
| eq           | -541.091327       | -540.83012  | -540.880014       |
| eq2          | -541.090110       | -540.828908 | -540.879036       |

ax

|   |           |           |           |
|---|-----------|-----------|-----------|
| C | 1.220876  | -0.658773 | 0.024242  |
| C | -0.027652 | -0.193195 | 0.745758  |
| H | -0.178414 | -0.805128 | 1.639728  |
| C | 2.307666  | -1.242028 | 0.884409  |
| C | 1.501974  | -2.125063 | -0.037345 |
| C | 0.122000  | 1.277478  | 1.173260  |
| C | 0.481118  | 2.164882  | -0.018427 |
| H | -0.337114 | 2.148068  | -0.747187 |
| H | 0.588038  | 3.198897  | 0.311970  |
| C | 1.641583  | 0.225536  | -1.132812 |
| C | 1.767994  | 1.684430  | -0.690336 |
| H | 2.595074  | 1.776354  | 0.020442  |
| H | 2.007664  | 2.316201  | -1.546909 |
| H | 2.125889  | -1.325760 | 1.947063  |
| H | 3.330861  | -1.027537 | 0.608781  |
| H | 1.988378  | -2.503917 | -0.925503 |
| H | 0.781398  | -2.794342 | 0.412302  |
| H | 0.925387  | 1.325825  | 1.912315  |
| H | 2.588450  | -0.137023 | -1.537319 |
| H | 0.897134  | 0.151996  | -1.929438 |
| H | -0.789690 | 1.622808  | 1.657814  |
| C | -1.276509 | -0.399825 | -0.093169 |
| O | -1.324166 | -0.906657 | -1.185643 |
| O | -2.370283 | 0.035094  | 0.546339  |
| C | -3.607426 | -0.140470 | -0.151398 |
| H | -3.785542 | -1.195466 | -0.349593 |
| H | -4.376610 | 0.253857  | 0.504947  |
| H | -3.595042 | 0.409833  | -1.090073 |

ax2

```
=====
C  0.827353    0.885198   -0.042468
C  0.051340   -0.091878  -0.909073
H -0.135638    0.375274   -1.881801
C  1.827915    1.762867   -0.742464
C  0.564141    2.350214   -0.164932
C  0.861250   -1.378346  -1.102213
C  1.277603   -1.984461   0.240164
H  0.383438   -2.310774   0.778525
H  1.886611   -2.873090   0.068087
C  1.228841    0.303353   1.296751
C  2.042366   -0.977370   1.100437
H  2.986825   -0.725470   0.608659
H  2.290387   -1.418940   2.066854
H  1.901402    1.690089  -1.818851
H  2.759209    1.963096  -0.230857
H  0.648702    2.948447   0.731836
H -0.204414    2.665652  -0.855832
H  1.754399   -1.125438  -1.678317
H  1.800254    1.042720   1.860671
H  0.328717    0.077352   1.879843
H  0.286650   -2.097594  -1.683701
C -1.333904   -0.410094  -0.364386
O -1.874637   -1.485212  -0.453321
O -1.930680    0.649159   0.188919
C -3.260286    0.426833   0.670031
H -3.260730   -0.336960   1.445134
H -3.589867    1.376929   1.078166
H -3.913124    0.119236  -0.144269
```

eq

```
=====
C -0.706578    0.868606   -0.136344
C -0.027201   -0.486405  -0.347796
H  0.001101   -0.673720  -1.423993
C -0.471542    1.631699   1.134902
C  0.077625    2.143721  -0.176990
C -0.847136   -1.586252   0.334265
C -2.277669   -1.600529  -0.202753
H -2.257989   -1.862801  -1.265040
H -2.854608   -2.374052   0.305954
C -2.120041    0.867587  -0.683233
C -2.952007   -0.239077  -0.034280
H -3.062766   -0.021832   1.032278
H -3.954335   -0.257599  -0.464718
H  0.234693    1.237155   1.850962
H -1.319485    2.149792   1.561070
H -0.399275    3.005978  -0.621971
H  1.147646    2.090639  -0.325166
H -0.853875   -1.399184   1.410441
H -2.575050    1.844340  -0.509248
H -2.087184    0.711206  -1.766400
H -0.369859   -2.554602   0.175001
```



|   |          |           |           |
|---|----------|-----------|-----------|
| C | 1.399148 | -0.488128 | 0.143089  |
| O | 1.741483 | -0.693761 | 1.281778  |
| O | 2.269612 | -0.220549 | -0.836721 |
| C | 3.643692 | -0.145895 | -0.439575 |
| H | 3.970443 | -1.097175 | -0.025019 |
| H | 4.201090 | 0.083349  | -1.341945 |
| H | 3.780953 | 0.641029  | 0.299621  |

eq2

```

=====
C  0.797040    0.886688    0.091827
C  0.058040   -0.343445    0.626881
H  0.277095   -0.408960    1.695937
C  0.309230    1.572559   -1.151917
C  0.200744    2.256102    0.192330
C  0.577123   -1.608526   -0.066924
C  2.085885   -1.748270    0.127543
H  2.302425   -1.872216    1.193082
H  2.440382   -2.647826   -0.377488
C  2.297458    0.754186    0.266485
C  2.824301   -0.517719   -0.396840
H  2.678162   -0.444443   -1.478740
H  3.896873   -0.614694   -0.222396
H -0.605445    1.225211   -1.611036
H  1.056994    1.935874   -1.843237
H  0.878650    3.073331    0.396025
H -0.785364    2.361362    0.621175
H  0.350600   -1.547649   -1.133366
H  2.785979    1.637233   -0.149317
H  2.530121    0.727377    1.336183
H  0.057560   -2.483699    0.326389
C -1.443011   -0.188893    0.546442
O -2.117027    0.328177    1.404619
O -1.964139   -0.674684   -0.583509
C -3.379777   -0.515811   -0.732080
H -3.644839    0.539572   -0.718959
H -3.627386   -0.955202   -1.692923
H -3.904680   -1.034435    0.067301

```

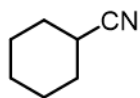

cyclohexanecarbonitrile

| Conformation | Electronic Energy | Enthalpy    | Gibbs Free Energy |
|--------------|-------------------|-------------|-------------------|
| ax           | -328.085444       | -327.907091 | -327.946788       |
| eq           | -328.085581       | -327.907226 | -327.94699        |

ax

```
=====
C  0.121198    1.269077    0.790360
C -0.745340    0.000119    0.885604
H -1.296177    0.000095    1.826631
C  0.121097   -1.269008    0.790462
C  0.998534   -1.260956   -0.459213
H  1.625964   -2.152785   -0.467247
H  0.363703   -1.311072   -1.349336
C  0.998657    1.260860   -0.459331
C  1.860428   -0.000092   -0.522914
H  2.459366   -0.000175   -1.434473
H  2.557756   -0.000078    0.320505
H  0.751451   -1.286384    1.682130
H  0.363845    1.310951   -1.349465
H  1.626157    2.152638   -0.467411
H -0.513330   -2.154609    0.818318
H -0.513054    2.154815    0.818164
H  0.751613    1.286519    1.681988
C -1.757448    0.000047   -0.179318
N -2.537151   -0.000029   -1.021958
```

eq

```
=====
C -1.449660   -1.259484    0.188382
C  0.039808   -1.270339   -0.147937
H  0.175372   -1.297798   -1.232133
C  0.713462    0.000271    0.397977
C  0.039549    1.270426   -0.148052
H  0.524823    2.152968    0.268271
H  0.174845    1.297647   -1.232234
C -2.131534   -0.000156   -0.343967
C -1.449851    1.259349    0.188423
H -1.920389    2.152074   -0.224820
H -1.571311    1.304766    1.274721
H  0.639834    0.000117    1.488952
H -2.082311   -0.000124   -1.437065
H -3.187349   -0.000284   -0.070167
H -1.919988   -2.152285   -0.224952
H -1.571081   -1.305057    1.274662
H  0.525277   -2.152632    0.268706
C  2.141572    0.000155    0.074266
N  3.256029   -0.000103   -0.201214
```

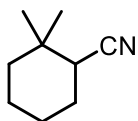

2,2-dimethylcyclohexane-1-carbonitrile

| Conformation | Electronic Energy | Enthalpy    | Gibbs Free Energy |
|--------------|-------------------|-------------|-------------------|
| ax           | -406.700670       | -406.46376  | -406.508887       |
| eq           | -406.701433       | -406.464579 | -406.509881       |

ax

| C | 0.997564  | -0.164565 | 0.026195  |
|---|-----------|-----------|-----------|
| C | -0.083525 | 0.622018  | 0.822554  |
| H | 0.366433  | 0.992067  | 1.746676  |
| C | -1.325909 | -0.229744 | 1.151814  |
| C | -1.921223 | -0.861006 | -0.104532 |
| H | -2.768526 | -1.489567 | 0.171072  |
| H | -2.309663 | -0.072044 | -0.756176 |
| C | 0.346263  | -0.818470 | -1.203196 |
| C | -0.875693 | -1.673911 | -0.866800 |
| H | -1.308380 | -2.067153 | -1.787648 |
| H | -0.576166 | -2.536338 | -0.266562 |
| H | -1.021150 | -1.007290 | 1.852586  |
| H | 0.042468  | -0.027157 | -1.896791 |
| H | 1.102034  | -1.415778 | -1.718236 |
| H | -2.063020 | 0.390789  | 1.661201  |
| C | 1.610067  | -1.219609 | 0.952755  |
| H | 2.374007  | -1.779106 | 0.410527  |
| H | 2.086872  | -0.741228 | 1.810507  |
| H | 0.878970  | -1.932787 | 1.328179  |
| C | 2.112523  | 0.779025  | -0.423921 |
| H | 2.550600  | 1.300336  | 0.429964  |
| H | 2.903345  | 0.210100  | -0.915345 |
| H | 1.747321  | 1.524545  | -1.131716 |
| C | -0.513508 | 1.814841  | 0.078561  |
| N | -0.869214 | 2.737020  | -0.505545 |

eq

|   |           |           |           |
|---|-----------|-----------|-----------|
| C | -0.131065 | 0.873982  | -0.019914 |
| C | -0.492241 | -0.570663 | -0.467028 |
| H | -0.410022 | -0.607396 | -1.557619 |
| C | 0.432562  | -1.650055 | 0.124159  |
| C | 1.884836  | -1.352362 | -0.237356 |
| H | 2.533271  | -2.104646 | 0.212847  |
| H | 2.004385  | -1.430703 | -1.322112 |
| C | 1.349824  | 1.100459  | -0.370122 |
| C | 2.291740  | 0.048545  | 0.213155  |
| H | 3.314248  | 0.260750  | -0.102107 |

|   |           |           |           |
|---|-----------|-----------|-----------|
| H | 2.281612  | 0.098311  | 1.304663  |
| H | 0.311514  | -1.677695 | 1.208543  |
| H | 1.448374  | 1.094499  | -1.460542 |
| H | 1.632723  | 2.099096  | -0.029877 |
| H | 0.132522  | -2.625009 | -0.259734 |
| C | -0.375123 | 1.072132  | 1.478127  |
| H | -0.085773 | 2.085287  | 1.762030  |
| H | -1.432517 | 0.947830  | 1.719448  |
| H | 0.194735  | 0.377244  | 2.093117  |
| C | -0.985505 | 1.873151  | -0.798780 |
| H | -2.045843 | 1.755602  | -0.566372 |
| H | -0.697336 | 2.893185  | -0.539137 |
| H | -0.853068 | 1.744944  | -1.874720 |
| C | -1.889592 | -0.885381 | -0.152739 |
| N | -2.977350 | -1.138594 | 0.113507  |

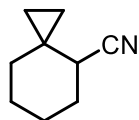

spiro[2.5]octane-4-carbonitrile

| Conformation | Electronic Energy | Enthalpy    | Gibbs Free Energy |
|--------------|-------------------|-------------|-------------------|
| ax           | -405.468614       | -405.254929 | -405.298581       |
| eq           | -405.467693       | -405.253944 | -405.297481       |

ax

|   |           |           |           |
|---|-----------|-----------|-----------|
| C | -0.924285 | 0.018814  | -0.053181 |
| C | 0.186456  | 0.705616  | 0.731608  |
| H | -0.244474 | 1.252229  | 1.572050  |
| C | -2.117358 | -0.422833 | 0.741367  |
| C | -2.224518 | 0.739855  | -0.215843 |
| C | 1.213237  | -0.322305 | 1.241574  |
| C | 1.730236  | -1.208498 | 0.110146  |
| H | 2.295736  | -0.597973 | -0.600887 |
| H | 2.423596  | -1.945234 | 0.516684  |
| C | -0.419838 | -0.880129 | -1.161407 |
| C | 0.580863  | -1.902767 | -0.621067 |
| H | 0.067404  | -2.575322 | 0.072454  |
| H | 0.968498  | -2.514001 | -1.436867 |
| H | -2.133273 | -0.202249 | 1.799494  |
| H | -2.583025 | -1.355733 | 0.456421  |
| H | -2.764491 | 0.585186  | -1.139208 |
| H | -2.309374 | 1.730318  | 0.209590  |
| H | 0.699116  | -0.935598 | 1.984598  |
| H | -1.268187 | -1.377884 | -1.633246 |
| H | 0.065254  | -0.270087 | -1.930922 |

|   |          |          |           |
|---|----------|----------|-----------|
| H | 2.032196 | 0.190903 | 1.744847  |
| C | 0.846065 | 1.710337 | -0.118090 |
| N | 1.360840 | 2.483844 | -0.792235 |

eq

```

=====
C  -0.096007    0.804768   -0.184674
C  -0.440893   -0.653797   -0.479558
H  -0.307988   -0.832985   -1.551052
C  -1.114365    1.882620   -0.379246
C  -0.700435    1.472507    1.014761
C   0.488340   -1.602686    0.301252
C   1.947837   -1.295622   -0.026263
H   2.593894   -1.959078    0.549425
H   2.128633   -1.507892   -1.084215
C   1.354924    1.102154   -0.503700
C   2.289452    0.165502    0.261341
H   3.326666    0.369988   -0.006734
H   2.188338    0.355690    1.333827
H  -2.106971    1.601702   -0.703683
H  -0.760193    2.832622   -0.753560
H  -0.068690    2.146730    1.575578
H  -1.421620    0.922264    1.603728
H   0.307122   -1.462445    1.369716
H   1.517643    0.978737   -1.579340
H   1.566725    2.144389   -0.260775
H   0.244878   -2.635949    0.055228
C  -1.841208   -0.960992   -0.180256
N  -2.933472   -1.205786    0.072844

```

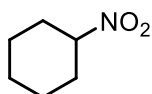

nitrocyclohexane

| Conformation | Electronic Energy | Enthalpy    | Gibbs Free Energy |
|--------------|-------------------|-------------|-------------------|
| ax           | -440.344668       | -440.16108  | -440.203599       |
| eq           | -440.345908       | -440.162184 | -440.205224       |

ax

```

=====
C   0.426009   -1.256043   -0.822156
C  -0.421921    0.002929   -0.930031
H  -0.999010    0.006864   -1.855811
C   0.407441    1.272870   -0.801455
C   1.266008    1.263241    0.463275
H   1.881891    2.162503    0.488578
H   0.617762    1.297985    1.344051
C   1.289475   -1.255345    0.439516

```

|   |           |           |           |
|---|-----------|-----------|-----------|
| C | 2.140578  | 0.011279  | 0.527147  |
| H | 2.725572  | 0.007748  | 1.447649  |
| H | 2.849830  | 0.026106  | -0.305964 |
| H | 1.053915  | 1.298535  | -1.681484 |
| H | 0.645801  | -1.320740 | 1.321454  |
| H | 1.922633  | -2.142924 | 0.443633  |
| H | -0.233186 | 2.150167  | -0.842788 |
| H | -0.201488 | -2.142241 | -0.875250 |
| H | 1.069649  | -1.258660 | -1.704694 |
| N | -1.525799 | -0.010621 | 0.126459  |
| O | -1.929652 | -1.084781 | 0.521397  |
| O | -1.982637 | 1.054207  | 0.488309  |

eq

```
=====
```

|   |           |           |           |
|---|-----------|-----------|-----------|
| C | 0.260454  | 1.233181  | 0.275718  |
| C | -0.372138 | 0.011834  | -0.387432 |
| H | -0.377505 | 0.125034  | -1.469014 |
| C | 0.312113  | -1.281986 | 0.028085  |
| C | 1.790752  | -1.208674 | -0.356948 |
| H | 2.288269  | -2.127502 | -0.046482 |
| H | 1.878616  | -1.147443 | -1.445314 |
| C | 1.740650  | 1.297822  | -0.102245 |
| C | 2.465744  | 0.007283  | 0.276347  |
| H | 3.509994  | 0.060460  | -0.033509 |
| H | 2.456799  | -0.103782 | 1.364587  |
| H | 0.216443  | -1.401106 | 1.108290  |
| H | 1.828915  | 1.461912  | -1.179808 |
| H | 2.199056  | 2.154776  | 0.391551  |
| H | -0.174736 | -2.131220 | -0.452576 |
| H | -0.261202 | 2.138060  | -0.037860 |
| H | 0.156302  | 1.135035  | 1.358423  |
| N | -1.829785 | -0.022787 | -0.012127 |
| O | -2.119086 | -0.336101 | 1.124935  |
| O | -2.643153 | 0.290917  | -0.859253 |

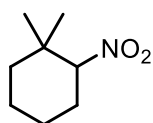

1,1-dimethyl-2-nitrocyclohexane

| Conformation | Electronic Energy | Enthalpy    | Gibbs Free Energy |
|--------------|-------------------|-------------|-------------------|
| ax           | -518.958412       | -518.715926 | -518.763186       |
| eq           | -518.960590       | -518.718114 | -518.76529        |

ax

```
=====
C -0.388858 -1.279705 1.155005
C 0.442829 -0.054815 0.765668
H 0.895018 0.390640 1.647655
C -0.337990 1.037637 -0.007987
C -1.235928 0.421321 -1.093674
H -1.840928 1.225032 -1.519576
H -0.607465 0.034139 -1.898795
C -1.297164 -1.818566 0.049985
C -2.131327 -0.703338 -0.576407
H -2.726710 -1.101823 -1.398879
H -2.836246 -0.312605 0.161551
H -0.698126 -2.300385 -0.722503
H -1.946690 -2.583182 0.478060
H 0.278245 -2.056743 1.531652
H -1.002516 -0.962532 2.000155
N 1.643069 -0.489001 -0.038944
O 1.463255 -1.145359 -1.046073
O 2.740607 -0.143746 0.353759
C 0.627882 2.039548 -0.642426
H 0.060391 2.856173 -1.090416
H 1.302772 2.464128 0.103098
H 1.226970 1.582319 -1.432327
C -1.186527 1.783137 1.031510
H -0.544742 2.284386 1.757619
H -1.788684 2.541055 0.528601
H -1.861176 1.123931 1.575184
```

eq

```
=====
C -0.462966 -1.622303 0.056688
C 0.311436 -0.415007 -0.452304
H 0.315449 -0.396758 -1.540893
C -0.228218 0.948182 0.050200
C -1.704639 0.993155 -0.396429
H -2.132145 1.932305 -0.039588
H -1.730897 1.023710 -1.490261
C -1.920529 -1.509831 -0.388768
C -2.535185 -0.194726 0.084440
H -3.554778 -0.100766 -0.291396
H -2.598183 -0.192096 1.175186
H -1.968455 -1.558818 -1.480387
H -2.483089 -2.360307 -0.003601
H -0.008049 -2.531012 -0.339433
H -0.404382 -1.670982 1.143088
N 1.768904 -0.549047 -0.095055
O 2.058472 -0.977107 1.004438
O 2.588355 -0.199877 -0.923295
C 0.520644 2.098321 -0.624197
H 0.045611 3.044026 -0.358387
H 1.562050 2.146889 -0.303870
H 0.500105 1.998637 -1.710667
C -0.117983 1.106763 1.569210
```

|   |           |          |          |
|---|-----------|----------|----------|
| H | 0.923073  | 1.180489 | 1.883919 |
| H | -0.620554 | 2.029997 | 1.862394 |
| H | -0.578052 | 0.286557 | 2.117100 |

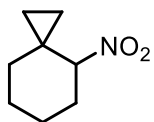

4-nitrospiro[2.5]octane

| Conformation | Electronic Energy | Enthalpy    | Gibbs Free Energy |
|--------------|-------------------|-------------|-------------------|
| ax           | -517.727026       | -517.507787 | -517.554056       |
| ax2          | -517.727702       | -517.508555 | -517.555083       |
| eq           | -517.726043       | -517.506844 | -517.552514       |

ax

|   |           |           |           |
|---|-----------|-----------|-----------|
| C | -0.409761 | -1.211101 | 1.236450  |
| C | 0.478870  | -0.073401 | 0.739350  |
| H | 1.000575  | 0.403239  | 1.564050  |
| C | -0.280492 | 0.963558  | -0.063606 |
| C | -1.244743 | 0.406156  | -1.089249 |
| H | -1.791740 | 1.235633  | -1.539722 |
| H | -0.691281 | -0.090272 | -1.891243 |
| C | -1.427598 | -1.731618 | 0.218966  |
| C | -2.202482 | -0.589032 | -0.435614 |
| H | -2.897319 | -0.984921 | -1.176992 |
| H | -2.796857 | -0.068001 | 0.321118  |
| H | -0.920304 | -2.311271 | -0.551811 |
| H | -2.113153 | -2.406689 | 0.732607  |
| H | 0.213766  | -2.019040 | 1.620749  |
| H | -0.947503 | -0.790957 | 2.090073  |
| N | 1.610278  | -0.587474 | -0.126022 |
| O | 1.370850  | -1.445459 | -0.952092 |
| O | 2.704498  | -0.081061 | 0.028276  |
| C | 0.392774  | 2.279846  | -0.308562 |
| H | 0.169717  | 2.775037  | -1.242770 |
| H | 1.403451  | 2.406356  | 0.053160  |
| C | -0.707016 | 2.178740  | 0.714114  |
| H | -0.429976 | 2.238319  | 1.756861  |
| H | -1.671421 | 2.598164  | 0.465512  |

ax2

|   |           |           |           |
|---|-----------|-----------|-----------|
| C | -0.486656 | 1.214199  | 1.141423  |
| C | -0.424895 | -0.250469 | 0.706454  |
| H | -0.615312 | -0.906928 | 1.554626  |
| C | 0.874679  | -0.594516 | 0.032852  |
| C | 1.342174  | 0.377244  | -1.033641 |
| H | 2.355520  | 0.106501  | -1.334042 |



|   |           |           |           |
|---|-----------|-----------|-----------|
| H | 0.706148  | 0.282992  | -1.916119 |
| C | -0.096120 | 2.158990  | 0.006777  |
| C | 1.294756  | 1.819395  | -0.528167 |
| H | 1.569690  | 2.503978  | -1.331174 |
| H | 2.026874  | 1.948993  | 0.274500  |
| H | -0.828467 | 2.087086  | -0.804363 |
| H | -0.127842 | 3.186459  | 0.369471  |
| H | -1.475956 | 1.439210  | 1.535076  |
| H | 0.225922  | 1.315517  | 1.962645  |
| N | -1.625700 | -0.526212 | -0.195965 |
| O | -1.447395 | -0.876383 | -1.342162 |
| O | -2.723502 | -0.377547 | 0.305146  |
| C | 1.243716  | -2.040692 | -0.073660 |
| H | 1.817239  | -2.335275 | -0.940954 |
| H | 0.525528  | -2.770069 | 0.274566  |
| C | 1.915367  | -1.174252 | 0.956318  |
| H | 1.650431  | -1.326228 | 1.993135  |
| H | 2.939163  | -0.876706 | 0.780380  |

eq

```
=====
```

|   |           |           |           |
|---|-----------|-----------|-----------|
| C | -0.506882 | -1.579444 | 0.289519  |
| C | 0.277771  | -0.504365 | -0.447349 |
| H | 0.247776  | -0.665114 | -1.523924 |
| C | -0.264575 | 0.885424  | -0.136512 |
| C | -1.722463 | 0.968364  | -0.550778 |
| H | -2.098451 | 1.963841  | -0.311703 |
| H | -1.794983 | 0.843059  | -1.635559 |
| C | -1.977188 | -1.498653 | -0.126002 |
| C | -2.553191 | -0.109524 | 0.144700  |
| H | -3.588725 | -0.058719 | -0.193311 |
| H | -2.553333 | 0.077828  | 1.222191  |
| H | -2.063879 | -1.726221 | -1.192212 |
| H | -2.543474 | -2.259167 | 0.411514  |
| H | -0.091875 | -2.561198 | 0.060032  |
| H | -0.413188 | -1.413370 | 1.363226  |
| N | 1.743646  | -0.586594 | -0.116187 |
| O | 2.069132  | -0.895929 | 1.011859  |
| O | 2.532316  | -0.316365 | -1.001125 |
| C | 0.584711  | 2.111274  | -0.241712 |
| H | 0.110730  | 3.001114  | -0.631194 |
| H | 1.629862  | 2.003479  | -0.494638 |
| C | 0.141681  | 1.606345  | 1.113436  |
| H | 0.895382  | 1.166678  | 1.750304  |
| H | -0.632137 | 2.155769  | 1.630890  |

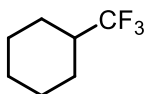

(trifluoromethyl)cyclohexane

| Conformation | Electronic Energy | Enthalpy    | Gibbs Free Energy |
|--------------|-------------------|-------------|-------------------|
| ax           | -572.902638       | -572.716069 | -572.759863       |
| eq           | -572.906179       | -572.719786 | -572.763851       |

ax

|   |           |           |           |
|---|-----------|-----------|-----------|
| C | 0.636524  | -1.272071 | -0.807349 |
| C | -0.219042 | -0.000000 | -0.905956 |
| H | -0.734510 | -0.000000 | -1.868788 |
| C | 0.636524  | 1.272071  | -0.807349 |
| C | 1.627299  | 1.259660  | 0.358887  |
| H | 2.255222  | 2.149587  | 0.296647  |
| H | 1.093590  | 1.315680  | 1.309770  |
| C | 1.627300  | -1.259660 | 0.358887  |
| C | 2.491649  | 0.000000  | 0.334066  |
| H | 3.182955  | 0.000000  | 1.177949  |
| H | 3.097499  | 0.000000  | -0.577838 |
| H | 1.200749  | 1.338881  | -1.740347 |
| H | 1.093590  | -1.315680 | 1.309770  |
| H | 2.255222  | -2.149587 | 0.296648  |
| H | -0.004406 | 2.153021  | -0.763958 |
| H | -0.004406 | -2.153021 | -0.763957 |
| H | 1.200749  | -1.338882 | -1.740346 |
| C | -1.351103 | -0.000000 | 0.088465  |
| F | -0.960976 | 0.000000  | 1.375988  |
| F | -2.149021 | 1.075667  | -0.057630 |
| F | -2.149021 | -1.075667 | -0.057631 |

eq

|   |           |           |           |
|---|-----------|-----------|-----------|
| C | 0.587988  | 1.265174  | 0.138569  |
| C | -0.098211 | 0.000000  | -0.385186 |
| H | -0.068991 | -0.000000 | -1.478831 |
| C | 0.587988  | -1.265174 | 0.138569  |
| C | 2.069974  | -1.258724 | -0.234064 |
| H | 2.550744  | -2.151387 | 0.167428  |
| H | 2.164913  | -1.304674 | -1.323013 |
| C | 2.069974  | 1.258724  | -0.234064 |
| C | 2.766571  | -0.000000 | 0.279579  |
| H | 3.814843  | -0.000000 | -0.022349 |
| H | 2.746792  | -0.000000 | 1.373758  |
| H | 0.487765  | -1.297796 | 1.227000  |
| H | 2.164913  | 1.304674  | -1.323013 |

|   |           |           |           |
|---|-----------|-----------|-----------|
| H | 2.550744  | 2.151387  | 0.167428  |
| H | 0.099235  | -2.152214 | -0.264558 |
| H | 0.099235  | 2.152214  | -0.264558 |
| H | 0.487765  | 1.297796  | 1.227000  |
| C | -1.557983 | 0.000000  | -0.028938 |
| F | -1.771985 | 0.000000  | 1.300443  |
| F | -2.205994 | 1.075705  | -0.513171 |
| F | -2.205994 | -1.075705 | -0.513170 |

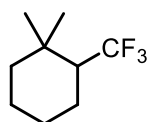

1,1-dimethyl-2-(trifluoromethyl)cyclohexane

| Conformation | Electronic Energy | Enthalpy   | Gibbs Free Energy |
|--------------|-------------------|------------|-------------------|
| ax           | -651.514746       | -651.26945 | -651.318025       |
| eq           | -651.516577       | -651.27147 | -651.32067        |

ax

|   |           |           |           |
|---|-----------|-----------|-----------|
| C | 0.844955  | 0.939397  | 0.096128  |
| C | -0.230043 | 0.032022  | 0.766615  |
| H | -0.534019 | 0.507887  | 1.702818  |
| C | 0.315595  | -1.370433 | 1.089971  |
| C | 0.963253  | -2.052810 | -0.113695 |
| H | 1.353558  | -3.024537 | 0.191407  |
| H | 0.214239  | -2.240342 | -0.887631 |
| C | 1.560054  | 0.203118  | -1.055282 |
| C | 2.082046  | -1.183598 | -0.682272 |
| H | 2.520015  | -1.655898 | -1.562828 |
| H | 2.880473  | -1.096906 | 0.059269  |
| H | 1.062374  | -1.258596 | 1.876406  |
| H | 0.874636  | 0.106738  | -1.899549 |
| H | 2.384012  | 0.836812  | -1.392416 |
| H | -0.478905 | -1.987154 | 1.506257  |
| C | -1.529614 | -0.063955 | -0.008375 |
| F | -1.378750 | -0.337552 | -1.317279 |
| F | -2.340571 | -1.025882 | 0.475995  |
| F | -2.252067 | 1.071130  | 0.054686  |
| C | 1.864205  | 1.322688  | 1.178658  |
| H | 2.642088  | 1.950471  | 0.741165  |
| H | 1.378951  | 1.890984  | 1.974451  |
| H | 2.348833  | 0.458396  | 1.629304  |
| C | 0.253180  | 2.241791  | -0.451986 |
| H | -0.421703 | 2.067275  | -1.289894 |
| H | -0.289564 | 2.788971  | 0.320479  |
| H | 1.065714  | 2.877311  | -0.808422 |

eq

|   |           |           |           |
|---|-----------|-----------|-----------|
| C | -0.433178 | -1.600728 | 0.149331  |
| C | 0.165807  | -0.301613 | -0.417223 |
| H | 0.156033  | -0.366653 | -1.509960 |
| C | -0.643426 | 0.968180  | -0.027683 |
| C | -2.107568 | 0.708346  | -0.443422 |
| H | -2.697406 | 1.578558  | -0.147765 |
| H | -2.146109 | 0.654869  | -1.536719 |
| C | -1.884500 | -1.777476 | -0.282172 |
| C | -2.715685 | -0.567673 | 0.128657  |
| H | -3.742611 | -0.673526 | -0.224263 |
| H | -2.759198 | -0.507756 | 1.219334  |
| H | -1.926160 | -1.892787 | -1.369386 |
| H | -2.287220 | -2.691954 | 0.154716  |
| H | 0.163483  | -2.448872 | -0.186236 |
| H | -0.379110 | -1.581524 | 1.239700  |
| C | 1.632769  | -0.272186 | -0.058559 |
| F | 1.861348  | -0.356090 | 1.265253  |
| F | 2.288535  | -1.315719 | -0.609993 |
| F | 2.282641  | 0.824341  | -0.483220 |
| C | -0.568517 | 1.281423  | 1.471438  |
| H | 0.432264  | 1.607030  | 1.756195  |
| H | -1.259181 | 2.095136  | 1.700981  |
| H | -0.836371 | 0.429780  | 2.095478  |
| C | -0.176886 | 2.204079  | -0.807900 |
| H | 0.778316  | 2.584372  | -0.452688 |
| H | -0.087703 | 1.986441  | -1.874032 |
| H | -0.914627 | 2.999984  | -0.688519 |

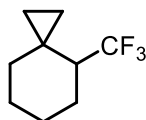

4-(trifluoromethyl)spiro[2.5]octane

| Conformation | Electronic Energy | Enthalpy    | Gibbs Free Energy |
|--------------|-------------------|-------------|-------------------|
| ax1          | -650.285932       | -650.063874 | -650.111365       |
| eq1          | -650.283152       | -650.061091 | -650.10883        |

ax1

|   |           |           |           |
|---|-----------|-----------|-----------|
| C | -0.890768 | 0.790072  | 0.010694  |
| C | 0.258128  | 0.105991  | 0.735611  |
| H | 0.534379  | 0.708044  | 1.604457  |
| C | -1.798433 | 1.624198  | 0.873665  |
| C | -0.878732 | 2.283212  | -0.120587 |
| C | -0.155122 | -1.296707 | 1.210762  |
| C | -0.828412 | -2.137864 | 0.123139  |
| H | -0.106223 | -2.402382 | -0.651705 |

|   |           |           |           |
|---|-----------|-----------|-----------|
| H | -1.171715 | -3.073645 | 0.566187  |
| C | -1.562915 | -0.040030 | -1.067354 |
| C | -2.004440 | -1.392932 | -0.507897 |
| H | -2.774131 | -1.229189 | 0.252541  |
| H | -2.454045 | -1.997297 | -1.296773 |
| C | 1.525574  | 0.072226  | -0.086178 |
| H | -1.553806 | 1.721623  | 1.922116  |
| H | -2.854890 | 1.597464  | 0.646874  |
| H | -1.318307 | 2.703350  | -1.014337 |
| H | -0.026888 | 2.820841  | 0.269369  |
| H | -0.865934 | -1.147429 | 2.026410  |
| H | -2.421659 | 0.513657  | -1.450687 |
| H | -0.881837 | -0.194740 | -1.907279 |
| H | 0.703978  | -1.819976 | 1.630364  |
| F | 1.415459  | -0.598776 | -1.246611 |
| F | 1.958233  | 1.304147  | -0.409262 |
| F | 2.537618  | -0.510852 | 0.586021  |

eq1

```
=====
```

|   |           |           |           |
|---|-----------|-----------|-----------|
| C | 0.671476  | 0.875504  | -0.183634 |
| C | -0.151578 | -0.396987 | -0.369063 |
| H | -0.111415 | -0.667171 | -1.429743 |
| C | 0.112645  | 2.263326  | -0.277644 |
| C | 0.566741  | 1.719671  | 1.056185  |
| C | 0.478900  | -1.537308 | 0.443242  |
| C | 1.919751  | -1.769489 | -0.013116 |
| H | 2.370769  | -2.558293 | 0.589840  |
| H | 1.905998  | -2.124872 | -1.047747 |
| C | 2.085712  | 0.651396  | -0.690941 |
| C | 2.755663  | -0.493345 | 0.069105  |
| H | 3.756426  | -0.673527 | -0.325875 |
| H | 2.869629  | -0.203121 | 1.117566  |
| C | -1.628344 | -0.287966 | -0.089634 |
| H | -0.948389 | 2.398746  | -0.418260 |
| H | 0.732943  | 3.006842  | -0.758579 |
| H | 1.495698  | 2.093731  | 1.463893  |
| H | -0.193825 | 1.497191  | 1.787934  |
| H | 0.460674  | -1.268125 | 1.502623  |
| H | 2.055219  | 0.416302  | -1.759596 |
| H | 2.657820  | 1.573291  | -0.576456 |
| H | -0.099315 | -2.452494 | 0.322431  |
| F | -1.922218 | 0.110969  | 1.159923  |
| F | -2.256175 | 0.564263  | -0.919779 |
| F | -2.245833 | -1.473822 | -0.255148 |

## Acyclic Conformations

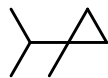

1-isopropyl-1-methylcyclopropane

| Conformation | Electronic Energy | Enthalpy    | Gibbs Free Energy |
|--------------|-------------------|-------------|-------------------|
| 1            | -275.098656       | -274.894486 | -274.935986       |
| 2            | -275.096483       | -274.892205 | -274.93343        |

1

|   |           |           |           |
|---|-----------|-----------|-----------|
| C | -0.840591 | 0.000639  | -0.480420 |
| H | -0.712907 | 0.002132  | -1.567014 |
| C | 0.559375  | -0.000240 | 0.117877  |
| C | 1.612655  | 0.756830  | -0.636112 |
| C | 1.613042  | -0.754716 | -0.638388 |
| H | 1.317703  | 1.257160  | -1.548351 |
| H | 2.383868  | -1.256109 | -0.070068 |
| H | 1.318088  | -1.252569 | -1.551964 |
| C | 0.659093  | -0.002657 | 1.626883  |
| H | 1.704990  | -0.002595 | 1.934584  |
| H | 0.184531  | 0.879558  | 2.060008  |
| H | 0.185502  | -0.886808 | 2.057144  |
| C | -1.620503 | 1.256511  | -0.096807 |
| H | -2.575914 | 1.291043  | -0.622029 |
| H | -1.831234 | 1.273566  | 0.973996  |
| H | -1.061892 | 2.159913  | -0.347587 |
| H | 2.383120  | 1.257011  | -0.066211 |
| C | -1.620722 | -1.256102 | -0.100311 |
| H | -1.831984 | -1.275799 | 0.970338  |
| H | -2.575870 | -1.289147 | -0.626095 |
| H | -1.062100 | -2.158943 | -0.353088 |

2

|   |           |           |           |
|---|-----------|-----------|-----------|
| C | 0.901457  | 0.188705  | -0.417157 |
| H | 1.006100  | 0.613158  | -1.420834 |
| C | -0.598682 | 0.116049  | -0.128402 |
| C | -1.062267 | -0.570976 | 1.123883  |
| C | -1.344209 | -1.185562 | -0.225601 |
| H | -0.321763 | -1.058964 | 1.742542  |
| H | -2.360029 | -1.146305 | -0.593183 |
| H | -0.802202 | -2.083340 | -0.481221 |
| C | -1.369215 | 1.350437  | -0.544121 |
| H | -2.425533 | 1.248199  | -0.294281 |
| H | -0.993899 | 2.245391  | -0.045513 |
| H | -1.290012 | 1.509032  | -1.621846 |
| C | 1.610223  | -1.163242 | -0.412411 |
| H | 2.680997  | -1.018829 | -0.560086 |

|   |           |           |           |
|---|-----------|-----------|-----------|
| H | 1.477266  | -1.678442 | 0.541651  |
| H | 1.249382  | -1.816240 | -1.205919 |
| H | -1.887989 | -0.128410 | 1.663096  |
| C | 1.589534  | 1.133346  | 0.570120  |
| H | 1.549510  | 0.715721  | 1.578773  |
| H | 2.638757  | 1.270734  | 0.305845  |
| H | 1.118363  | 2.115755  | 0.593102  |

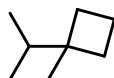

1-isopropyl-1-methylcyclobutane

| Conformation | Electronic Energy | Enthalpy    | Gibbs Free Energy |
|--------------|-------------------|-------------|-------------------|
| 1            | -314.402919       | -314.168723 | -314.212199       |
| 2            | -314.400011       | -314.165515 | -314.208805       |
| 3            | -314.400397       | -314.16589  | -314.208454       |
| 4            | -314.401110       | -314.16668  | -314.210152       |

1

|   |           |           |           |
|---|-----------|-----------|-----------|
| C | 1.108323  | 0.000000  | -0.525799 |
| H | 0.904692  | 0.000000  | -1.601611 |
| C | -0.260819 | -0.000000 | 0.158361  |
| C | -1.258052 | -1.078781 | -0.345625 |
| C | -1.258052 | 1.078781  | -0.345624 |
| H | -0.994250 | -1.419449 | -1.347628 |
| H | -1.418244 | 1.944025  | 0.297229  |
| H | -0.994250 | 1.419450  | -1.347626 |
| C | -0.180603 | -0.000000 | 1.680582  |
| H | -1.182999 | -0.000001 | 2.112608  |
| H | 0.338405  | -0.885049 | 2.051943  |
| H | 0.338404  | 0.885049  | 2.051944  |
| C | 1.913098  | -1.257515 | -0.205201 |
| H | 2.813035  | -1.304936 | -0.819942 |
| H | 2.227078  | -1.267778 | 0.839866  |
| H | 1.329776  | -2.161299 | -0.392171 |
| H | -1.418244 | -1.944026 | 0.297226  |
| C | 1.913098  | 1.257515  | -0.205201 |
| H | 2.227079  | 1.267778  | 0.839866  |
| H | 2.813033  | 1.304937  | -0.819944 |
| H | 1.329774  | 2.161299  | -0.392170 |
| C | -2.363786 | 0.000000  | -0.385493 |
| H | -3.027388 | 0.000000  | -1.247027 |
| H | -2.965146 | -0.000000 | 0.521442  |

2

|   |           |           |           |
|---|-----------|-----------|-----------|
| C | 1.234850  | -0.011927 | -0.391362 |
| H | 1.516012  | 0.333385  | -1.391910 |
| C | -0.267277 | 0.272238  | -0.216558 |

|   |           |           |           |
|---|-----------|-----------|-----------|
| C | -0.876267 | 0.015254  | 1.189078  |
| C | -1.304236 | -0.738797 | -0.784793 |
| H | -0.331377 | -0.758472 | 1.729756  |
| H | -1.773655 | -0.472975 | -1.731868 |
| H | -0.906693 | -1.748652 | -0.853383 |
| C | -0.611028 | 1.678734  | -0.701084 |
| H | -1.676635 | 1.882507  | -0.583773 |
| H | -0.067046 | 2.442033  | -0.143976 |
| H | -0.364231 | 1.786792  | -1.759505 |
| C | 1.600919  | -1.492358 | -0.292206 |
| H | 2.685043  | -1.610500 | -0.319920 |
| H | 1.246599  | -1.926041 | 0.645717  |
| H | 1.184719  | -2.075446 | -1.112359 |
| H | -0.999071 | 0.883665  | 1.836274  |
| C | 2.053891  | 0.777202  | 0.633101  |
| H | 1.823534  | 0.434906  | 1.644970  |
| H | 3.121202  | 0.625601  | 0.468397  |
| H | 1.859019  | 1.847946  | 0.587416  |
| C | -2.136076 | -0.561973 | 0.505629  |
| H | -2.567464 | -1.460199 | 0.941334  |
| H | -2.918612 | 0.185217  | 0.392007  |

3

```
=====
```

|   |           |           |           |
|---|-----------|-----------|-----------|
| C | 0.252982  | 0.499572  | -0.137349 |
| C | 0.931645  | 0.040271  | 1.185551  |
| C | 1.446108  | -0.124025 | -0.916769 |
| H | 1.437664  | 0.868966  | 1.680179  |
| H | 1.198004  | -0.751548 | -1.772072 |
| H | 2.153612  | 0.639999  | -1.236794 |
| C | 0.134678  | 2.008945  | -0.289560 |
| H | 1.117937  | 2.474126  | -0.208222 |
| H | -0.286612 | 2.273676  | -1.263086 |
| H | -0.500424 | 2.442830  | 0.483819  |
| C | -2.212997 | 0.340249  | 0.460560  |
| H | -3.131643 | -0.224363 | 0.296540  |
| H | -1.945278 | 0.238163  | 1.515494  |
| H | -2.429505 | 1.389665  | 0.267291  |
| H | 0.298859  | -0.466559 | 1.913241  |
| C | -1.042125 | -1.719959 | -0.309673 |
| H | -0.841044 | -2.026374 | 0.718941  |
| H | -2.006818 | -2.141993 | -0.593708 |
| H | -0.284234 | -2.165517 | -0.952993 |
| C | 1.907594  | -0.841276 | 0.372743  |
| H | 2.962365  | -0.752887 | 0.623198  |
| H | 1.631098  | -1.893298 | 0.389091  |
| C | -1.090989 | -0.195553 | -0.430448 |
| H | -1.335359 | 0.045773  | -1.471254 |

4

```
=====
```

|   |           |           |           |
|---|-----------|-----------|-----------|
| C | -0.291119 | 0.000192  | 0.364374  |
| C | -1.327779 | 1.078568  | -0.064691 |
| C | -1.327684 | -1.078615 | -0.063772 |



|   |           |           |           |
|---|-----------|-----------|-----------|
| H | -1.897467 | 1.438742  | 0.791955  |
| H | -0.953358 | -1.933681 | -0.624692 |
| H | -1.897311 | -1.438244 | 0.793148  |
| C | 0.076006  | 0.000828  | 1.839184  |
| H | -0.829096 | 0.001005  | 2.447971  |
| H | 0.657367  | -0.882811 | 2.109169  |
| H | 0.657278  | 0.884757  | 2.108425  |
| C | 1.805469  | -1.247737 | -0.386536 |
| H | 2.578156  | -1.283902 | -1.155744 |
| H | 2.308410  | -1.237571 | 0.581889  |
| H | 1.222767  | -2.166630 | -0.454965 |
| H | -0.953573 | 1.933296  | -0.626202 |
| C | 1.805564  | 1.247345  | -0.387523 |
| H | 2.308804  | 1.237738  | 0.580761  |
| H | 2.578035  | 1.283056  | -1.156983 |
| H | 1.222937  | 2.166259  | -0.456318 |
| C | -2.101570 | -0.000394 | -0.852152 |
| H | -3.185108 | -0.000385 | -0.759269 |
| H | -1.839971 | -0.000814 | -1.908515 |
| C | 0.939076  | -0.000213 | -0.562616 |
| H | 0.554357  | -0.000661 | -1.588237 |

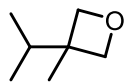

3-isopropyl-3-methyloxetane

| Conformation | Electronic Energy | Enthalpy    | Gibbs Free Energy |
|--------------|-------------------|-------------|-------------------|
| 1            | -350.314072       | -350.103248 | -350.146852       |
| 2            | -350.310996       | -350.099815 | -350.143533       |
| 3            | -350.312287       | -350.101218 | -350.143983       |

1

|   |           |           |           |
|---|-----------|-----------|-----------|
| C | -1.068825 | -0.000035 | -0.530800 |
| H | -0.829983 | 0.000005  | -1.598796 |
| C | 0.271638  | 0.000070  | 0.202628  |
| C | 1.297393  | 1.029881  | -0.303853 |
| C | 1.297248  | -1.029924 | -0.303723 |
| H | 1.027789  | 1.499358  | -1.252136 |
| H | 1.632566  | -1.784698 | 0.407230  |
| H | 1.027559  | -1.499415 | -1.251978 |
| C | 0.164534  | 0.000212  | 1.720278  |
| H | 1.162457  | 0.000153  | 2.161764  |
| H | -0.360648 | 0.885518  | 2.080268  |
| H | -0.360836 | -0.884906 | 2.080460  |
| C | -1.878718 | 1.258792  | -0.231084 |
| H | -2.759433 | 1.307624  | -0.872309 |
| H | -2.221989 | 1.267229  | 0.804492  |

|   |           |           |           |
|---|-----------|-----------|-----------|
| H | -1.288031 | 2.161696  | -0.399630 |
| H | 1.632765  | 1.784648  | 0.407077  |
| O | 2.297253  | -0.000092 | -0.504468 |
| C | -1.878508 | -1.258898 | -0.230840 |
| H | -2.221621 | -1.267207 | 0.804780  |
| H | -2.759361 | -1.308051 | -0.871831 |
| H | -1.287835 | -2.161807 | -0.399281 |

2

```
=====
```

|   |           |           |           |
|---|-----------|-----------|-----------|
| C | 1.197308  | -0.013445 | -0.413831 |
| H | 1.474583  | 0.339544  | -1.411555 |
| C | -0.287101 | 0.323461  | -0.211488 |
| C | -0.893834 | -0.030509 | 1.159170  |
| C | -1.358682 | -0.643975 | -0.755196 |
| H | -0.303590 | -0.723829 | 1.759897  |
| H | -2.021920 | -0.239007 | -1.519293 |
| H | -1.002894 | -1.627254 | -1.057075 |
| C | -0.610870 | 1.756968  | -0.612888 |
| H | -1.672428 | 1.960392  | -0.463068 |
| H | -0.046759 | 2.477904  | -0.021900 |
| H | -0.379133 | 1.918106  | -1.667305 |
| C | 1.507477  | -1.508561 | -0.341162 |
| H | 2.586058  | -1.663848 | -0.381679 |
| H | 1.147214  | -1.944767 | 0.593102  |
| H | 1.063638  | -2.062809 | -1.166487 |
| H | -1.221311 | 0.807143  | 1.775053  |
| O | -2.011194 | -0.711692 | 0.537494  |
| C | 2.052363  | 0.733959  | 0.612584  |
| H | 1.799466  | 0.409625  | 1.625292  |
| H | 3.109565  | 0.521830  | 0.452425  |
| H | 1.917105  | 1.813107  | 0.559505  |

3

```
=====
```

|   |           |           |           |
|---|-----------|-----------|-----------|
| C | 1.089552  | -0.154647 | -0.440056 |
| H | 1.310786  | 0.081573  | -1.486178 |
| C | -0.280969 | 0.479457  | -0.141578 |
| C | -1.451037 | -0.235481 | -0.841283 |
| C | -0.949875 | -0.044761 | 1.142631  |
| H | -2.242672 | 0.441328  | -1.166957 |
| H | -0.335054 | -0.603813 | 1.846745  |
| H | -1.523932 | 0.715526  | 1.675505  |
| C | -0.265425 | 1.990470  | -0.292476 |
| H | -1.276678 | 2.390619  | -0.217804 |
| H | 0.336682  | 2.459580  | 0.485480  |
| H | 0.147881  | 2.280395  | -1.260712 |
| C | 1.109588  | -1.676675 | -0.288092 |
| H | 2.078531  | -2.062095 | -0.606302 |
| H | 0.968724  | -1.970435 | 0.753620  |
| H | 0.345090  | -2.170122 | -0.886768 |
| H | -1.213196 | -0.936832 | -1.639923 |
| O | -1.827551 | -0.912400 | 0.382965  |
| C | 2.185307  | 0.454011  | 0.435432  |

|   |          |           |          |
|---|----------|-----------|----------|
| H | 1.926507 | 0.353961  | 1.493040 |
| H | 3.130765 | -0.064900 | 0.274910 |
| H | 2.344132 | 1.510175  | 0.224150 |

## N-Heterocycles

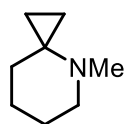

4-methyl-4-azaspiro[2.5]octane

| Conformation | Electronic Energy | Enthalpy    | Gibbs Free Energy |
|--------------|-------------------|-------------|-------------------|
| ax           | -368.552780       | -368.321815 | -368.363599       |
| eq           | -368.551067       | -368.319947 | -368.361743       |

ax

|   |           |           |           |
|---|-----------|-----------|-----------|
| C | -0.802696 | -0.158906 | -0.060095 |
| C | -1.710390 | -0.752099 | 0.976735  |
| C | -2.281273 | -0.020304 | -0.216651 |
| C | 1.182573  | 0.664535  | 0.986616  |
| C | 2.062073  | -0.250416 | 0.129888  |
| H | 2.396407  | 0.283199  | -0.763442 |
| H | 2.956526  | -0.519168 | 0.694462  |
| C | -0.032480 | -1.112167 | -0.954141 |
| C | 1.285101  | -1.502559 | -0.279952 |
| H | 1.064689  | -2.095159 | 0.613443  |
| H | 1.883963  | -2.128629 | -0.942747 |
| C | 0.092347  | 1.981578  | -0.744887 |
| H | 0.700661  | 1.601209  | -1.573819 |
| H | -0.883620 | 2.258950  | -1.142930 |
| H | -1.761341 | -0.249614 | 1.931745  |
| H | -1.808916 | -1.828192 | 1.005460  |
| H | -2.763790 | -0.604544 | -0.987430 |
| H | -2.705270 | 0.957361  | -0.037126 |
| H | 0.941722  | 0.148127  | 1.920333  |
| H | -0.641844 | -1.993089 | -1.160678 |
| H | 0.174972  | -0.630616 | -1.914405 |
| H | 1.713258  | 1.582042  | 1.244434  |
| N | -0.087334 | 1.034037  | 0.349700  |
| H | 0.572389  | 2.881891  | -0.360277 |

eq

|   |           |           |           |
|---|-----------|-----------|-----------|
| C | 0.553538  | -0.500152 | -0.177710 |
| C | 1.920068  | -1.079197 | -0.331379 |
| C | 1.305104  | -0.958646 | 1.049581  |
| C | -0.875171 | 1.340289  | 0.359529  |
| C | -2.119768 | 0.547426  | -0.015796 |

|   |           |           |           |
|---|-----------|-----------|-----------|
| H | -2.957985 | 0.879743  | 0.598404  |
| H | -2.369962 | 0.761949  | -1.058129 |
| C | -0.618616 | -1.361902 | -0.599491 |
| C | -1.881277 | -0.950220 | 0.153938  |
| H | -2.741879 | -1.520615 | -0.197829 |
| H | -1.753009 | -1.177871 | 1.216290  |
| C | 1.407761  | 1.809273  | -0.200691 |
| H | 1.773826  | 1.801195  | 0.835418  |
| H | 2.233432  | 1.568993  | -0.866187 |
| H | 2.754344  | -0.431380 | -0.551219 |
| H | 1.982932  | -2.063312 | -0.774407 |
| H | 0.966833  | -1.859319 | 1.542418  |
| H | 1.731425  | -0.211745 | 1.703499  |
| H | -1.035445 | 2.401159  | 0.165190  |
| H | -0.380771 | -2.409852 | -0.413261 |
| H | -0.774889 | -1.241922 | -1.675524 |
| H | -0.673141 | 1.228991  | 1.437783  |
| N | 0.287215  | 0.909819  | -0.423080 |
| H | 1.083955  | 2.824030  | -0.428769 |

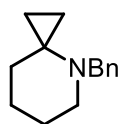

4-benzyl-4-azaspiro[2.5]octane

| Conformation | Electronic Energy | Enthalpy    | Gibbs Free Energy |
|--------------|-------------------|-------------|-------------------|
| ax           | -599.583802       | -599.266557 | -599.3205         |
| ax2          | -599.578802       | -599.26142  | -599.316007       |
| ax3          | -599.582589       | -599.265272 | -599.318992       |
| ax4          | -599.582590       | -599.265272 | -599.318986       |
| ax5          | -599.582589       | -599.265271 | -599.318983       |
| eq           | -599.580380       | -599.262975 | -599.317138       |
| eq1          | -599.580381       | -599.262976 | -599.317144       |
| eq2          | -599.577535       | -599.259711 | -599.312082       |
| eq3          | -599.580320       | -599.263108 | -599.316674       |
| eq4          | -599.577535       | -599.259713 | -599.312085       |
| eq5          | -599.580314       | -599.263149 | -599.316834       |

ax

|   |          |           |           |
|---|----------|-----------|-----------|
| C | 2.086892 | -0.673673 | -0.158125 |
| C | 2.813629 | -1.610704 | 0.760992  |
| C | 2.302686 | -2.089831 | -0.578456 |
| C | 0.773059 | 0.842796  | 1.141010  |
| C | 1.507941 | 2.049014  | 0.549993  |
| H | 0.958502 | 2.436571  | -0.311859 |

|   |           |           |           |
|---|-----------|-----------|-----------|
| H | 1.537371  | 2.847738  | 1.292947  |
| C | 2.882133  | 0.442328  | -0.807800 |
| C | 2.923580  | 1.656416  | 0.123443  |
| H | 3.506739  | 1.400226  | 1.013367  |
| H | 3.426268  | 2.494099  | -0.361732 |
| C | -0.157761 | -0.145443 | -0.895785 |
| H | 0.063755  | 0.758142  | -1.474900 |
| H | 0.000889  | -0.998034 | -1.558800 |
| H | 2.283199  | -1.948797 | 1.639349  |
| H | 3.879676  | -1.475480 | 0.878295  |
| H | 3.024590  | -2.279422 | -1.360213 |
| H | 1.439854  | -2.741061 | -0.570987 |
| H | 1.280175  | 0.533423  | 2.058899  |
| H | 3.889444  | 0.090883  | -1.035447 |
| H | 2.414326  | 0.721670  | -1.756819 |
| H | -0.251383 | 1.105217  | 1.407112  |
| N | 0.739094  | -0.325657 | 0.250315  |
| C | -1.606886 | -0.109461 | -0.472353 |
| C | -2.397657 | 1.009110  | -0.716458 |
| C | -2.176509 | -1.206376 | 0.175119  |
| C | -3.733941 | 1.035713  | -0.326161 |
| H | -1.963077 | 1.867956  | -1.213868 |
| C | -3.507951 | -1.185115 | 0.566222  |
| H | -1.566494 | -2.079667 | 0.371948  |
| C | -4.291737 | -0.061351 | 0.316212  |
| H | -4.334972 | 1.913794  | -0.521866 |
| H | -3.938094 | -2.044261 | 1.063776  |
| H | -5.329287 | -0.043935 | 0.621485  |

ax2

```
=====
```

|   |           |           |           |
|---|-----------|-----------|-----------|
| C | 1.744672  | -0.581763 | -0.112848 |
| C | 3.193571  | -0.992322 | -0.038134 |
| C | 2.095427  | -2.025364 | 0.044213  |
| C | 1.372514  | 1.548056  | 0.947930  |
| C | 0.883579  | 2.150731  | -0.373291 |
| H | -0.201245 | 2.060873  | -0.450712 |
| H | 1.125383  | 3.215386  | -0.384928 |
| C | 1.268854  | -0.066596 | -1.461134 |
| C | 1.533799  | 1.436234  | -1.557030 |
| H | 2.614005  | 1.612622  | -1.538582 |
| H | 1.156667  | 1.832486  | -2.500672 |
| C | -0.014343 | -0.406513 | 1.630039  |
| H | 0.148521  | -1.451460 | 1.896912  |
| H | -0.173653 | 0.143263  | 2.559188  |
| H | 3.721370  | -0.764492 | 0.876237  |
| H | 3.779223  | -0.944487 | -0.945498 |
| H | 1.939525  | -2.671883 | -0.807975 |
| H | 1.921877  | -2.481120 | 1.008221  |
| H | 2.438481  | 1.782220  | 1.047889  |
| H | 1.786586  | -0.605004 | -2.256687 |
| H | 0.199166  | -0.253098 | -1.579687 |
| H | 0.859564  | 2.004121  | 1.795538  |
| N | 1.234389  | 0.095082  | 1.057658  |

|   |           |           |           |
|---|-----------|-----------|-----------|
| C | -1.280982 | -0.328303 | 0.797948  |
| C | -1.646144 | -1.386574 | -0.032866 |
| C | -2.108248 | 0.792219  | 0.852271  |
| C | -2.793530 | -1.317118 | -0.814232 |
| H | -1.019465 | -2.270459 | -0.070411 |
| C | -3.257121 | 0.869001  | 0.073626  |
| H | -1.846709 | 1.613766  | 1.509231  |
| C | -3.599876 | -0.185031 | -0.766471 |
| H | -3.060951 | -2.146153 | -1.456078 |
| H | -3.887348 | 1.746989  | 0.125884  |
| H | -4.494758 | -0.129076 | -1.371604 |

ax3

```
=====
```

|   |           |           |           |
|---|-----------|-----------|-----------|
| C | 1.196654  | -0.813604 | 0.228660  |
| C | 1.471995  | -1.774155 | 1.349813  |
| C | 0.195625  | -1.878058 | 0.551584  |
| C | 2.156784  | 1.280677  | 0.836043  |
| C | 3.072741  | 1.269662  | -0.390175 |
| H | 2.600467  | 1.816404  | -1.210541 |
| H | 4.000077  | 1.792701  | -0.150408 |
| C | 2.057414  | -0.945539 | -1.014645 |
| C | 3.362652  | -0.167914 | -0.824893 |
| H | 3.956774  | -0.660638 | -0.049115 |
| H | 3.953786  | -0.182222 | -1.741539 |
| C | 0.002500  | 1.256105  | -0.289439 |
| H | 0.001415  | 2.304292  | 0.015795  |
| H | 0.354571  | 1.224534  | -1.326225 |
| H | 1.390142  | -1.389522 | 2.356264  |
| H | 2.236741  | -2.521928 | 1.193916  |
| H | 0.097047  | -2.695425 | -0.149270 |
| H | -0.716788 | -1.574938 | 1.042272  |
| H | 2.677843  | 0.807639  | 1.672629  |
| H | 2.259092  | -2.000276 | -1.206497 |
| H | 1.519728  | -0.559114 | -1.885260 |
| H | 1.915549  | 2.302301  | 1.131402  |
| N | 0.896256  | 0.548579  | 0.638401  |
| C | -1.410753 | 0.729858  | -0.239230 |
| C | -2.179762 | 0.899528  | 0.912141  |
| C | -1.963791 | 0.053676  | -1.321286 |
| C | -3.469467 | 0.392408  | 0.984057  |
| H | -1.755101 | 1.425357  | 1.758916  |
| C | -3.256671 | -0.458737 | -1.254815 |
| H | -1.374317 | -0.083177 | -2.220091 |
| C | -4.010821 | -0.293478 | -0.100615 |
| H | -4.055103 | 0.530926  | 1.883266  |
| H | -3.671092 | -0.988335 | -2.102407 |
| H | -5.015234 | -0.691217 | -0.045118 |

ax4

```
=====
```

|   |          |          |           |
|---|----------|----------|-----------|
| C | 1.196782 | 0.813959 | -0.227659 |
| C | 1.472703 | 1.775933 | -1.347481 |
| C | 0.195954 | 1.878848 | -0.549794 |

|   |           |           |           |
|---|-----------|-----------|-----------|
| C | 2.157090  | -1.279462 | -0.837579 |
| C | 3.072538  | -1.270172 | 0.389066  |
| H | 2.599880  | -1.818026 | 1.208470  |
| H | 3.999949  | -1.792917 | 0.148968  |
| C | 2.056912  | 0.944083  | 1.016215  |
| C | 3.362284  | 0.166789  | 0.825956  |
| H | 3.956742  | 0.660611  | 0.051139  |
| H | 3.952998  | 0.179767  | 1.742888  |
| C | 0.002382  | -1.256672 | 0.286912  |
| H | 0.001187  | -2.304214 | -0.020487 |
| H | 0.354289  | -1.227240 | 1.323816  |
| H | 1.391525  | 1.392621  | -2.354485 |
| H | 2.237339  | 2.523505  | -1.190070 |
| H | 0.096875  | 2.695410  | 0.151926  |
| H | -0.716187 | 1.576254  | -1.041305 |
| H | 2.678562  | -0.805330 | -1.673295 |
| H | 2.258428  | 1.998535  | 1.209790  |
| H | 1.518823  | 0.556276  | 1.885988  |
| H | 1.916051  | -2.300702 | -1.134415 |
| N | 0.896500  | -0.547640 | -0.639485 |
| C | -1.410802 | -0.730160 | 0.237630  |
| C | -1.963945 | -0.056661 | 1.321433  |
| C | -2.179737 | -0.896988 | -0.914106 |
| C | -3.256794 | 0.455773  | 1.256232  |
| H | -1.374376 | 0.077878  | 2.220518  |
| C | -3.469526 | -0.389714 | -0.984794 |
| H | -1.755141 | -1.420695 | -1.762230 |
| C | -4.010943 | 0.293345  | 0.101536  |
| H | -3.671434 | 0.983140  | 2.105109  |
| H | -4.055032 | -0.525969 | -1.884432 |
| H | -5.015374 | 0.691182  | 0.047110  |

ax5

```
=====
```

|   |           |           |           |
|---|-----------|-----------|-----------|
| C | -1.196879 | 0.813994  | 0.227548  |
| C | -1.472573 | 1.776014  | 1.347377  |
| C | -0.196014 | 1.878944  | 0.549381  |
| C | -2.156927 | -1.279512 | 0.837626  |
| C | -3.072581 | -1.270281 | -0.388857 |
| H | -2.599958 | -1.818000 | -1.208377 |
| H | -3.999880 | -1.793176 | -0.148653 |
| C | -2.057301 | 0.944046  | -1.016136 |
| C | -3.362581 | 0.166671  | -0.825612 |
| H | -3.956912 | 0.660398  | -0.050638 |
| H | -3.953497 | 0.179636  | -1.742415 |
| C | -0.002347 | -1.256515 | -0.287188 |
| H | -0.001264 | -2.304129 | 0.019963  |
| H | -0.354187 | -1.226795 | -1.324108 |
| H | -1.391106 | 1.392744  | 2.354373  |
| H | -2.237292 | 2.523535  | 1.190123  |
| H | -0.097131 | 2.695455  | -0.152424 |
| H | 0.716247  | 1.576430  | 1.040721  |
| H | -2.678286 | -0.805430 | 1.673443  |
| H | -2.258891 | 1.998478  | -1.209735 |

|   |           |           |           |
|---|-----------|-----------|-----------|
| H | -1.519385 | 0.556189  | -1.885992 |
| H | -1.915746 | -2.300732 | 1.134410  |
| N | -0.896439 | -0.547589 | 0.639315  |
| C | 1.410890  | -0.730132 | -0.237728 |
| C | 2.179630  | -0.896913 | 0.914136  |
| C | 1.964224  | -0.056730 | -1.321497 |
| C | 3.469430  | -0.389678 | 0.984983  |
| H | 1.754881  | -1.420526 | 1.762240  |
| C | 3.257081  | 0.455659  | -1.256137 |
| H | 1.374796  | 0.077770  | -2.220680 |
| C | 4.011040  | 0.293283  | -0.101306 |
| H | 4.054805  | -0.525899 | 1.884712  |
| H | 3.671861  | 0.982969  | -2.104981 |
| H | 5.015470  | 0.691101  | -0.046717 |

eq

```
=====
```

|   |           |           |           |
|---|-----------|-----------|-----------|
| C | 2.084826  | -0.609470 | 0.251476  |
| C | 2.356616  | -2.023684 | 0.645855  |
| C | 2.673108  | -1.559571 | -0.763245 |
| C | 0.746901  | 1.073139  | -0.803191 |
| C | 1.639819  | 2.189019  | -0.281645 |
| H | 1.627208  | 3.019414  | -0.989022 |
| H | 1.230290  | 2.555087  | 0.663624  |
| C | 3.025791  | 0.434833  | 0.819525  |
| C | 3.060106  | 1.679635  | -0.062114 |
| H | 3.684835  | 2.451449  | 0.389195  |
| H | 3.505851  | 1.423614  | -1.027843 |
| C | -0.279226 | -1.040807 | -0.324133 |
| H | -0.163760 | -1.309461 | -1.383318 |
| H | -0.168440 | -1.951651 | 0.260169  |
| H | 1.549695  | -2.729077 | 0.764761  |
| H | 3.184621  | -2.175896 | 1.323986  |
| H | 3.709138  | -1.433659 | -1.045134 |
| H | 2.025956  | -1.931070 | -1.545115 |
| H | -0.276147 | 1.434189  | -0.905833 |
| H | 4.021624  | 0.001300  | 0.916543  |
| H | 2.682308  | 0.704559  | 1.822647  |
| H | 1.087731  | 0.759351  | -1.803555 |
| N | 0.734100  | -0.080405 | 0.105324  |
| C | -1.681058 | -0.516695 | -0.105386 |
| C | -2.590860 | -0.445090 | -1.155349 |
| C | -2.089026 | -0.112067 | 1.165945  |
| C | -3.886956 | 0.017566  | -0.944338 |
| H | -2.281435 | -0.749722 | -2.147806 |
| C | -3.379328 | 0.352169  | 1.380805  |
| H | -1.385797 | -0.161683 | 1.987859  |
| C | -4.283861 | 0.418533  | 0.324169  |
| H | -4.581605 | 0.068930  | -1.772242 |
| H | -3.682703 | 0.660932  | 2.372481  |
| H | -5.289185 | 0.781169  | 0.491089  |

eq1

```
=====
```



|   |           |           |           |
|---|-----------|-----------|-----------|
| C | -2.084640 | -0.609707 | -0.251360 |
| C | -2.355823 | -2.023929 | -0.646037 |
| C | -2.672587 | -1.560257 | 0.763091  |
| C | -0.747387 | 1.073685  | 0.803088  |
| C | -1.640505 | 2.189183  | 0.281109  |
| H | -1.628051 | 3.019807  | 0.988218  |
| H | -1.231067 | 2.555006  | -0.664293 |
| C | -3.025888 | 0.434283  | -0.819537 |
| C | -3.060620 | 1.679300  | 0.061767  |
| H | -3.685612 | 2.450734  | -0.389823 |
| H | -3.506296 | 1.423439  | 1.027569  |
| C | 0.279281  | -1.040143 | 0.325447  |
| H | 0.163966  | -1.307501 | 1.384982  |
| H | 0.168456  | -1.951715 | -0.257693 |
| H | -1.548662 | -2.729012 | -0.765250 |
| H | -3.183742 | -2.176310 | -1.324248 |
| H | -3.708661 | -1.434943 | 1.045112  |
| H | -2.025342 | -1.931587 | 1.544978  |
| H | 0.275577  | 1.434972  | 0.905818  |
| H | -4.021591 | 0.000409  | -0.916450 |
| H | -2.682519 | 0.703873  | -1.822735 |
| H | -1.088299 | 0.760161  | 1.803526  |
| N | -0.734106 | -0.080239 | -0.104949 |
| C | 1.681097  | -0.516270 | 0.105946  |
| C | 2.088741  | -0.112325 | -1.165703 |
| C | 2.591246  | -0.444296 | 1.155590  |
| C | 3.379058  | 0.351589  | -1.381185 |
| H | 1.385244  | -0.162194 | -1.987368 |
| C | 3.887350  | 0.018030  | 0.943952  |
| H | 2.282059  | -0.748332 | 2.148307  |
| C | 4.283942  | 0.418302  | -0.324876 |
| H | 3.682161  | 0.659831  | -2.373106 |
| H | 4.582244  | 0.069696  | 1.771633  |
| H | 5.289282  | 0.780669  | -0.492280 |

eq2

|   |           |           |           |
|---|-----------|-----------|-----------|
| C | -1.485745 | 0.893575  | 0.031196  |
| C | -0.832610 | 2.231822  | 0.096423  |
| C | -0.668969 | 1.379115  | -1.146173 |
| C | -1.357451 | -1.489821 | 0.210339  |
| C | -2.858403 | -1.635720 | -0.017564 |
| H | -3.056615 | -2.581637 | -0.524159 |
| H | -3.358869 | -1.668924 | 0.953670  |
| C | -2.986467 | 0.858406  | -0.185604 |
| C | -3.397993 | -0.463060 | -0.832202 |
| H | -4.483245 | -0.524079 | -0.923743 |
| H | -2.984605 | -0.507242 | -1.844263 |
| C | 0.228121  | -0.155631 | 1.546637  |
| H | 0.246305  | 0.744771  | 2.159759  |
| H | 0.242521  | -1.005920 | 2.231714  |
| H | 0.038859  | 2.365518  | 0.717230  |
| H | -1.481109 | 3.095051  | 0.039662  |
| H | -1.202894 | 1.674402  | -2.038876 |

|   |           |           |           |
|---|-----------|-----------|-----------|
| H | 0.304472  | 0.941410  | -1.312740 |
| H | -0.995274 | -2.293962 | 0.852184  |
| H | -3.281594 | 1.701941  | -0.810986 |
| H | -3.485043 | 0.968603  | 0.781644  |
| H | -0.837385 | -1.575296 | -0.755652 |
| N | -1.061935 | -0.215546 | 0.863400  |
| C | 1.499609  | -0.198555 | 0.710622  |
| C | 2.347251  | 0.906753  | 0.651578  |
| C | 1.864022  | -1.348468 | 0.006394  |
| C | 3.505258  | 0.884222  | -0.117884 |
| H | 2.101478  | 1.796827  | 1.217694  |
| C | 3.015877  | -1.374233 | -0.770348 |
| H | 1.250103  | -2.236586 | 0.073510  |
| C | 3.836950  | -0.253985 | -0.842138 |
| H | 4.147565  | 1.754372  | -0.149390 |
| H | 3.278092  | -2.273086 | -1.312606 |
| H | 4.734081  | -0.273855 | -1.446112 |

eq3

```
=====
```

|   |           |           |           |
|---|-----------|-----------|-----------|
| C | -1.375334 | 0.733471  | 0.288357  |
| C | -0.515094 | 1.922486  | 0.560042  |
| C | -1.665343 | 2.038271  | -0.416562 |
| C | -1.988208 | -1.052870 | -1.172441 |
| C | -3.058958 | -1.534475 | -0.199769 |
| H | -3.883369 | -1.977058 | -0.760895 |
| H | -2.628099 | -2.319757 | 0.427021  |
| C | -2.377029 | 0.316265  | 1.343861  |
| C | -3.558299 | -0.394359 | 0.684827  |
| H | -4.251747 | -0.769677 | 1.438500  |
| H | -4.106285 | 0.326050  | 0.070485  |
| C | 0.287027  | -0.199136 | -1.279291 |
| H | 0.315305  | -1.004346 | -2.015840 |
| H | 0.231027  | 0.732717  | -1.858388 |
| H | 0.480589  | 1.959645  | 0.144680  |
| H | -0.618771 | 2.389691  | 1.529530  |
| H | -2.545810 | 2.588380  | -0.115627 |
| H | -1.406297 | 2.124369  | -1.462541 |
| H | -1.589082 | -1.899735 | -1.730147 |
| H | -2.712910 | 1.195261  | 1.895366  |
| H | -1.885577 | -0.356169 | 2.053178  |
| H | -2.431864 | -0.353506 | -1.899085 |
| N | -0.882744 | -0.421487 | -0.447450 |
| C | 1.601292  | -0.224638 | -0.523150 |
| C | 1.722670  | -0.816330 | 0.730547  |
| C | 2.734717  | 0.335415  | -1.112376 |
| C | 2.952749  | -0.851455 | 1.380155  |
| H | 0.846056  | -1.242261 | 1.199269  |
| C | 3.964876  | 0.298051  | -0.468817 |
| H | 2.648789  | 0.809854  | -2.083032 |
| C | 4.078360  | -0.296823 | 0.783593  |
| H | 3.029976  | -1.311870 | 2.356432  |
| H | 4.833157  | 0.738407  | -0.940998 |
| H | 5.033559  | -0.322832 | 1.290394  |

eq4

```
=====
C -1.486006      0.893663      0.030987
C -0.832528      2.231726      0.095852
C -0.669170      1.378698     -1.146551
C -1.357385     -1.489662      0.210327
C -2.858374     -1.635830     -0.017291
H -3.056591     -2.581750     -0.523883
H -3.358615     -1.669127      0.954048
C -2.986690      0.858385     -0.185397
C -3.398334     -0.463175     -0.831768
H -4.483615     -0.524161     -0.922958
H -2.985261     -0.507378     -1.843954
C  0.228023     -0.155142      1.546595
H  0.246340      0.745461      2.159448
H  0.242498     -1.005114      2.232077
H  0.038696      2.365726      0.716936
H -1.481048      3.094903      0.038597
H -1.202623      1.674209     -2.039462
H  0.304046      0.940327     -1.312599
H -0.994877     -2.293794      0.851958
H -3.282077      1.701765     -0.810885
H -3.485031      0.968721      0.781957
H -0.837468     -1.574936     -0.755826
N -1.061913     -0.215356      0.863303
C  1.499763     -0.198361      0.710710
C  2.347687      0.906764      0.651665
C  1.863903     -1.348302      0.006386
C  3.505701      0.884017     -0.117755
H  2.102075      1.796870      1.217771
C  3.015773     -1.374281     -0.770329
H  1.249726     -2.236246      0.073227
C  3.837130     -0.254247     -0.842041
H  4.148203      1.754022     -0.149217
H  3.277755     -2.273124     -1.312727
H  4.734288     -0.274400     -1.445964
```

eq5

```
=====
C  1.384483      0.757929     -0.215231
C  0.534642      1.974529     -0.375527
C  1.684809      1.989398      0.607709
C  1.976300     -1.163516      1.074153
C  3.041430     -1.566117      0.060753
H  3.860070     -2.069226      0.577547
H  2.601017     -2.283990     -0.636296
C  2.383575      0.429014     -1.304175
C  3.555216     -0.354590     -0.713753
H  4.244880     -0.666080     -1.499310
H  4.111201      0.298647     -0.034883
C -0.291747     -0.300836      1.254359
H -0.324102     -1.164052      1.921578
H -0.235832      0.579062      1.909849
```

|   |           |           |           |
|---|-----------|-----------|-----------|
| H | -0.461201 | 1.980573  | 0.041412  |
| H | 0.642504  | 2.528734  | -1.297586 |
| H | 2.570079  | 2.557832  | 0.359526  |
| H | 1.424699  | 1.979645  | 1.656987  |
| H | 1.566007  | -2.053355 | 1.550891  |
| H | 2.731392  | 1.351284  | -1.771133 |
| H | 1.885248  | -0.168268 | -2.073451 |
| H | 2.428005  | -0.540009 | 1.862213  |
| N | 0.879633  | -0.454647 | 0.410342  |
| C | -1.604386 | -0.260405 | 0.495719  |
| C | -2.754870 | 0.169862  | 1.157026  |
| C | -1.708065 | -0.665137 | -0.831431 |
| C | -3.983882 | 0.186694  | 0.510933  |
| H | -2.683826 | 0.496888  | 2.187960  |
| C | -2.937456 | -0.644546 | -1.483582 |
| H | -0.818705 | -0.990334 | -1.353839 |
| C | -4.079675 | -0.221297 | -0.815830 |
| H | -4.865882 | 0.522192  | 1.040371  |
| H | -3.000743 | -0.958610 | -2.517231 |
| H | -5.034480 | -0.204293 | -1.323736 |

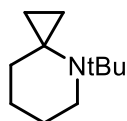

4-(*tert*-butyl)-4-azaspiro[2.5]octane

| Conformation | Electronic Energy | Enthalpy    | Gibbs Free Energy |
|--------------|-------------------|-------------|-------------------|
| ax2          | -486.464721       | -486.144757 | -486.194045       |
| ax           | -486.466407       | -486.146681 | -486.19568        |
| eq           | -486.462170       | -486.142531 | -486.191924       |

ax2

|   |           |           |           |
|---|-----------|-----------|-----------|
| C | 0.832747  | 0.809403  | 0.006744  |
| C | 1.654516  | 1.660536  | -0.928758 |
| C | 0.745395  | 2.303963  | 0.085121  |
| C | 0.343862  | -1.168980 | -1.184075 |
| C | 1.080574  | -2.041570 | -0.165610 |
| H | 1.491121  | -2.918206 | -0.671326 |
| H | 0.379255  | -2.403033 | 0.590449  |
| C | 1.656990  | 0.078401  | 1.061687  |
| C | 2.200220  | -1.234203 | 0.491372  |
| H | 2.694664  | -1.812815 | 1.273036  |
| H | 2.955546  | -1.006111 | -0.267071 |
| C | -1.550488 | -0.035298 | 0.085345  |
| H | 1.335673  | 1.701253  | -1.960151 |
| H | 2.722189  | 1.701078  | -0.765336 |
| H | 1.192501  | 2.780389  | 0.946687  |
| H | -0.133375 | 2.789244  | -0.305184 |
| H | -0.415042 | -1.738806 | -1.709757 |

|   |           |           |           |
|---|-----------|-----------|-----------|
| H | 2.480559  | 0.722234  | 1.375847  |
| H | 1.058300  | -0.129417 | 1.947251  |
| H | 1.069872  | -0.849762 | -1.938820 |
| C | -1.460660 | -0.251549 | 1.603967  |
| H | -0.954317 | -1.181865 | 1.858147  |
| H | -0.943379 | 0.575268  | 2.090674  |
| H | -2.471352 | -0.294951 | 2.014408  |
| C | -2.385230 | -1.174499 | -0.505965 |
| H | -3.379512 | -1.143701 | -0.061183 |
| H | -2.495215 | -1.067075 | -1.586219 |
| H | -1.956494 | -2.153777 | -0.292508 |
| C | -2.338928 | 1.264132  | -0.143637 |
| H | -2.364881 | 1.515395  | -1.204589 |
| H | -3.364260 | 1.136891  | 0.207460  |
| H | -1.910810 | 2.100056  | 0.404656  |
| N | -0.237861 | 0.059386  | -0.626231 |

ax

```
=====
```

|   |           |           |           |
|---|-----------|-----------|-----------|
| C | -0.857675 | 0.795647  | -0.029563 |
| C | -1.758003 | 1.546428  | 0.921502  |
| C | -0.867607 | 2.291955  | -0.034209 |
| C | -0.263310 | -1.157789 | 1.173561  |
| C | -1.081821 | -2.039684 | 0.214642  |
| H | -1.533939 | -2.847342 | 0.794692  |
| H | -0.429800 | -2.506511 | -0.521723 |
| C | -1.589028 | 0.035203  | -1.121085 |
| C | -2.168246 | -1.244283 | -0.512038 |
| H | -2.640770 | -1.862273 | -1.277073 |
| H | -2.948942 | -0.961956 | 0.200170  |
| C | 1.565334  | 0.003839  | -0.087343 |
| H | -1.473951 | 1.555143  | 1.963855  |
| H | -2.821036 | 1.524648  | 0.726179  |
| H | -1.320097 | 2.782692  | -0.885016 |
| H | -0.021109 | 2.802888  | 0.395718  |
| H | 0.569418  | -1.727990 | 1.582711  |
| H | -2.385720 | 0.654327  | -1.537472 |
| H | -0.901003 | -0.205098 | -1.935920 |
| H | -0.907099 | -0.889129 | 2.016659  |
| C | 1.759142  | -1.247343 | -0.962555 |
| H | 1.686625  | -2.164211 | -0.378284 |
| H | 1.035239  | -1.292092 | -1.775554 |
| H | 2.757148  | -1.218072 | -1.402775 |
| C | 2.640137  | -0.016198 | 1.007370  |
| H | 3.634720  | -0.082039 | 0.562978  |
| H | 2.584655  | 0.894791  | 1.604207  |
| H | 2.516755  | -0.870670 | 1.673672  |
| C | 1.820037  | 1.225085  | -0.971605 |
| H | 1.826530  | 2.148013  | -0.395306 |
| H | 2.800908  | 1.114151  | -1.434791 |
| H | 1.079546  | 1.314325  | -1.766721 |
| N | 0.242595  | 0.097034  | 0.599676  |

eq

```

=====
C  -0.720006    0.813089   -0.151559
C  -0.902750    1.666498    1.088210
C  -0.290284    2.246153   -0.163937
C  -0.458170   -1.382639    0.668805
C  -1.787779   -1.826722    0.058932
H  -2.246229   -2.581502    0.700744
H  -1.576859   -2.298680   -0.904566
C  -2.022585    0.493115   -0.866185
C  -2.737078   -0.649377   -0.145281
H  -3.624645   -0.961786   -0.697711
H  -3.075817   -0.288810    0.830297
C   1.632579   -0.208880   -0.101657
H  -0.232740    1.497740    1.918494
H  -1.908060    1.958570    1.359020
H  -0.890776    2.917430   -0.762933
H   0.751552    2.510379   -0.116626
H   0.192759   -2.247151    0.733951
H  -2.656365    1.380942   -0.891596
H  -1.800133    0.209764   -1.898514
H  -0.626280   -1.016282    1.693061
C   2.149312    0.490552    1.168293
H   1.916416    1.552727    1.198918
H   1.727094    0.018578    2.057643
H   3.234998    0.391322    1.223562
C   2.121542    0.502233   -1.370767
H   3.199222    0.661741   -1.309915
H   1.918712   -0.127025   -2.239229
H   1.648021    1.463694   -1.538716
C   2.277985   -1.603393   -0.136224
H   1.820327   -2.225737   -0.906705
H   3.336014   -1.489645   -0.372751
H   2.212964   -2.120229    0.820342
N   0.157603   -0.349973   -0.169794
=====

```

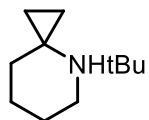

4-(*tert*-butyl)-4λ<sup>4</sup>-azaspiro[2.5]octane

| Conformation | Electronic Energy | Enthalpy    | Gibbs Free Energy |
|--------------|-------------------|-------------|-------------------|
| ax2          | -486.933348       | -486.59698  | -486.645817       |
| ax           | -486.934942       | -486.599028 | -486.647865       |
| eq           | -486.930527       | -486.594672 | -486.643616       |

ax2

```

=====
C  0.891502      0.816948      0.030892
C  1.700060      1.664490     -0.904793
C  0.801622      2.304781      0.121554
C  0.347230     -1.208583     -1.206626
C  1.026595     -2.065300     -0.157322
H  1.399949     -2.956314     -0.662035
H  0.303758     -2.398614      0.588656
C  1.662598      0.026662      1.068315
C  2.170432     -1.294496      0.494410
H  2.634163     -1.887686      1.281353
H  2.934919     -1.091955     -0.259753
C -1.593456     -0.025859      0.124511
H  1.378011      1.729582     -1.934980
H  2.768514      1.670164     -0.749635
H  1.244910      2.755688      0.997268
H -0.075503      2.799993     -0.261723
H -0.444461     -1.727006     -1.731489
H  2.498623      0.653254      1.378888
H  1.061214     -0.159341      1.954231
H  1.078403     -0.871620     -1.940660
C -1.427188     -0.201220      1.626250
H -0.928739     -1.130165      1.892038
H -0.902336      0.640815      2.073454
H -2.431297     -0.227769      2.049673
C -2.396539     -1.183964     -0.456833
H -3.382231     -1.159981      0.004863
H -2.527505     -1.082579     -1.534662
H -1.946114     -2.150175     -0.234698
C -2.341497      1.281147     -0.143032
H -2.370754      1.517137     -1.208211
H -3.367258      1.157146      0.200801
H -1.910117      2.116918      0.400904
N -0.227907      0.070571     -0.632525
H -0.468958      0.620876     -1.460573

```

ax

```

=====
C -0.901963      0.807692     -0.054840
C -1.806965      1.546430      0.885244
C -0.897513      2.298615     -0.048530
C -0.286898     -1.195280      1.202340
C -1.072570     -2.053178      0.216210
H -1.530178     -2.847548      0.806702
H -0.405675     -2.535436     -0.492677
C -1.552492     -0.000567     -1.147518
C -2.144985     -1.270127     -0.538262
H -2.582765     -1.899324     -1.312136
H -2.946716     -0.987241      0.147369
C  1.605074      0.005036     -0.123695
H -1.549525      1.557289      1.935486

```

|   |           |           |           |
|---|-----------|-----------|-----------|
| H | -2.863782 | 1.500966  | 0.667408  |
| H | -1.319393 | 2.784329  | -0.916272 |
| H | -0.059146 | 2.805221  | 0.404788  |
| H | 0.561930  | -1.731105 | 1.616394  |
| H | -2.331098 | 0.614425  | -1.597954 |
| H | -0.832654 | -0.239707 | -1.932104 |
| H | -0.932972 | -0.886809 | 2.022367  |
| C | 1.753419  | -1.282036 | -0.925786 |
| H | 1.708172  | -2.168608 | -0.296783 |
| H | 1.024512  | -1.363127 | -1.728651 |
| H | 2.744305  | -1.252708 | -1.377896 |
| C | 2.657495  | 0.039298  | 0.982138  |
| H | 3.643387  | -0.022385 | 0.524336  |
| H | 2.602140  | 0.972561  | 1.544949  |
| H | 2.553647  | -0.799132 | 1.670475  |
| C | 1.789393  | 1.204991  | -1.043740 |
| H | 1.792191  | 2.143818  | -0.494907 |
| H | 2.762352  | 1.094659  | -1.521206 |
| H | 1.031546  | 1.244206  | -1.824553 |
| N | 0.232305  | 0.103634  | 0.615048  |
| H | 0.451626  | 0.684966  | 1.428165  |

eq

```
=====
```

|   |           |           |           |
|---|-----------|-----------|-----------|
| C | 0.754936  | 0.849009  | 0.168061  |
| C | 0.886633  | 1.640912  | -1.091727 |
| C | 0.312350  | 2.274920  | 0.150816  |
| C | 0.468141  | -1.405240 | -0.663458 |
| C | 1.811081  | -1.816638 | -0.075810 |
| H | 2.246216  | -2.568227 | -0.733628 |
| H | 1.626474  | -2.299080 | 0.888265  |
| C | 2.053693  | 0.493109  | 0.862890  |
| C | 2.756351  | -0.634511 | 0.109272  |
| H | 3.651011  | -0.949960 | 0.644828  |
| H | 3.072576  | -0.264019 | -0.868238 |
| C | -1.697903 | -0.196161 | 0.085148  |
| H | 0.199514  | 1.454295  | -1.901951 |
| H | 1.895168  | 1.887262  | -1.391160 |
| H | 0.928517  | 2.954409  | 0.721943  |
| H | -0.731137 | 2.532045  | 0.119147  |
| H | -0.193810 | -2.259639 | -0.705112 |
| H | 2.676475  | 1.385679  | 0.895629  |
| H | 1.848868  | 0.197791  | 1.896227  |
| H | 0.562733  | -0.968784 | -1.655042 |
| C | -2.096855 | 0.482390  | -1.217022 |
| H | -1.882154 | 1.547189  | -1.235513 |
| H | -1.624829 | 0.000553  | -2.073277 |
| H | -3.174860 | 0.363470  | -1.324313 |
| C | -2.186620 | 0.547169  | 1.326978  |
| H | -3.263236 | 0.683853  | 1.236079  |
| H | -1.997742 | -0.051268 | 2.220082  |
| H | -1.732142 | 1.521719  | 1.463202  |
| C | -2.305246 | -1.600837 | 0.124701  |
| H | -1.857304 | -2.208101 | 0.912744  |



|   |           |           |           |
|---|-----------|-----------|-----------|
| H | -3.365860 | -1.491686 | 0.345492  |
| H | -2.216845 | -2.119730 | -0.827242 |
| N | -0.162486 | -0.349391 | 0.216871  |
| H | -0.069607 | -0.706771 | 1.174639  |

### Butane Model Conformations

| Dihed. Angle | Electronic Energy | Enthalpy    | Gibbs Free Energy |
|--------------|-------------------|-------------|-------------------|
| 34           | -158.413077       | -158.273797 | -158.307667       |
| 38           | -158.413778       | -158.274573 | -158.308345       |
| 47           | -158.415067       | -158.275868 | -158.309478       |
| 56           | -158.415735       | -158.276558 | -158.310369       |
| 64           | -158.415821       | -158.276732 | -158.310776       |
| 77           | -158.415239       | -158.27623  | -158.310808       |

34

|   |           |           |           |
|---|-----------|-----------|-----------|
| C | -0.411909 | -0.649415 | 0.700226  |
| C | 0.411909  | 0.649415  | 0.700226  |
| H | 0.054500  | 1.300347  | 1.499617  |
| C | 0.411909  | 1.405967  | -0.625203 |
| H | 0.880168  | 0.822269  | -1.417264 |
| H | -0.603193 | 1.650174  | -0.946659 |
| H | 0.963725  | 2.341898  | -0.531818 |
| C | -0.411909 | -1.405967 | -0.625203 |
| H | 0.603193  | -1.650174 | -0.946659 |
| H | -0.963725 | -2.341898 | -0.531818 |
| H | -0.880168 | -0.822269 | -1.417264 |
| H | -1.449558 | -0.406666 | 0.945987  |
| H | -0.054500 | -1.300347 | 1.499617  |
| H | 1.449558  | 0.406666  | 0.945987  |

38

|   |           |           |           |
|---|-----------|-----------|-----------|
| C | -0.446282 | -0.624885 | 0.693830  |
| C | 0.446282  | 0.624885  | 0.693830  |
| H | 0.144865  | 1.279131  | 1.513565  |
| C | 0.446282  | 1.402783  | -0.619169 |
| H | 0.871478  | 0.813739  | -1.431327 |
| H | -0.566060 | 1.691417  | -0.911299 |
| H | 1.037302  | 2.314365  | -0.525959 |
| C | -0.446282 | -1.402783 | -0.619169 |
| H | 0.566060  | -1.691417 | -0.911299 |
| H | -1.037302 | -2.314365 | -0.525959 |
| H | -0.871478 | -0.813739 | -1.431327 |
| H | -1.475157 | -0.321563 | 0.907053  |
| H | -0.144865 | -1.279131 | 1.513565  |
| H | 1.475157  | 0.321563  | 0.907053  |

47

```
=====  
C -0.510934 -0.570467 0.675844  
C 0.510934 0.570467 0.675844  
H 0.324110 1.215309 1.536690  
C 0.510934 1.403639 -0.602565  
H 0.838945 0.817906 -1.461112  
H -0.488152 1.787207 -0.822892  
H 1.182319 2.257732 -0.509216  
C -0.510934 -1.403639 -0.602565  
H 0.488152 -1.787207 -0.822892  
H -1.182319 -2.257732 -0.509216  
H -0.838945 -0.817906 -1.461112  
H -1.510541 -0.149263 0.816857  
H -0.324110 -1.215309 1.536690  
H 1.510541 0.149263 0.816857
```

56

```
=====  
C -0.559751 -0.520833 0.652540  
C 0.559751 0.520833 0.652540  
H 0.471316 1.137005 1.549825  
C 0.559751 1.417231 -0.581689  
H 0.790050 0.853414 -1.485941  
H -0.415989 1.887919 -0.721987  
H 1.302668 2.210145 -0.489755  
C -0.559751 -1.417231 -0.581689  
H 0.415989 -1.887919 -0.721987  
H -1.302668 -2.210145 -0.489755  
H -0.790050 -0.853414 -1.485941  
H -1.522989 -0.007540 0.722752  
H -0.471316 -1.137005 1.549825  
H 1.522989 0.007540 0.722752
```

64

```
=====  
C -0.591740 -0.483739 0.627569  
C 0.591740 0.483739 0.627569  
H 0.576793 1.062673 1.553634  
C 0.591740 1.442094 -0.559848  
H 0.710651 0.911604 -1.505058  
H -0.346089 1.999931 -0.606202  
H 1.405880 2.163505 -0.483211  
C -0.591740 -1.442094 -0.559848  
H 0.346089 -1.999931 -0.606202  
H -1.405880 -2.163505 -0.483211  
H -0.710651 -0.911604 -1.505058  
H -1.522493 0.090540 0.634509  
H -0.576793 -1.062673 1.553634  
H 1.522493 -0.090540 0.634509
```

```
=====
C  -0.632720    -0.430231     0.581394
C   0.632720     0.430231     0.581394
H   0.729649     0.930587     1.547325
C   0.632720     1.488239    -0.518518
H   0.545898     1.037460    -1.508405
H  -0.207382     2.173098    -0.389742
H   1.550262     2.077445    -0.503839
C  -0.632720    -1.488239    -0.518518
H   0.207382    -2.173098    -0.389742
H  -1.550262    -2.077445    -0.503839
H  -0.545898    -1.037460    -1.508405
H  -1.507512     0.217336     0.477403
H  -0.729649    -0.930587     1.547325
H   1.507512    -0.217336     0.477403
```
